# Supplementary material for: Elucidating bonding preferences in tetrakis(imido)uranate(VI) dianions
Source: Springer Nature journal article supplement (doi:10.1038/nchem.2767), 2017-04-24
Supplement: 41557_2017_BFnchem2767_MOESM5_ESM.mol [file 41557_2017_BFnchem2767_MOESM5_ESM.mol]

nchem.2767-comp2Li.mol
  ChemDraw04061711512D

 55 56  0  0  0  0  0  0  0  0999 V2000
    4.3948   -2.3520    0.0000 Li  0  3  0  0  0  0  0  0  0  0  0  0
    5.2170   -2.3520    0.0000 Li  0  3  0  0  0  0  0  0  0  0  0  0
   -2.8696   -1.7329    0.0000 C   0  0  0  0  0  0  0  0  0  0  0  0
   -2.8696   -0.9079    0.0000 C   0  0  0  0  0  0  0  0  0  0  0  0
   -2.1551   -0.4954    0.0000 C   0  0  0  0  0  0  0  0  0  0  0  0
   -3.5840   -0.4954    0.0000 C   0  0  0  0  0  0  0  0  0  0  0  0
   -4.2985   -0.9079    0.0000 C   0  0  0  0  0  0  0  0  0  0  0  0
   -5.0130   -0.4954    0.0000 C   0  0  0  0  0  0  0  0  0  0  0  0
   -5.0130    0.3296    0.0000 C   0  0  0  0  0  0  0  0  0  0  0  0
   -4.2985    0.7421    0.0000 C   0  0  0  0  0  0  0  0  0  0  0  0
   -4.4418    1.5545    0.0000 C   0  0  0  0  0  0  0  0  0  0  0  0
   -3.8098    2.0848    0.0000 C   0  0  0  0  0  0  0  0  0  0  0  0
   -5.2170    1.8367    0.0000 C   0  0  0  0  0  0  0  0  0  0  0  0
   -3.5840    0.3296    0.0000 C   0  0  0  0  0  0  0  0  0  0  0  0
   -2.3436    0.7810    0.0000 N   0  0  0  0  0  0  0  0  0  0  0  0
   -1.0290    0.0220    0.0000 U   0  6  0  0  0  0  0  0  0  0  0  0
   -0.1463    1.5510    0.0000 N   0  0  0  0  0  0  0  0  0  0  0  0
   -0.5131    2.5588    0.0000 C   0  0  0  0  0  0  0  0  0  0  0  0
   -1.2883    2.8410    0.0000 C   0  0  0  0  0  0  0  0  0  0  0  0
   -2.0028    2.4285    0.0000 C   0  0  0  0  0  0  0  0  0  0  0  0
   -2.0028    1.6035    0.0000 C   0  0  0  0  0  0  0  0  0  0  0  0
   -2.7173    2.8410    0.0000 C   0  0  0  0  0  0  0  0  0  0  0  0
   -1.4316    3.6534    0.0000 C   0  0  0  0  0  0  0  0  0  0  0  0
   -0.7996    4.1837    0.0000 C   0  0  0  0  0  0  0  0  0  0  0  0
   -0.0244    3.9016    0.0000 C   0  0  0  0  0  0  0  0  0  0  0  0
    0.1189    3.0891    0.0000 C   0  0  0  0  0  0  0  0  0  0  0  0
    0.8942    2.8069    0.0000 C   0  0  0  0  0  0  0  0  0  0  0  0
    1.5261    3.3372    0.0000 C   0  0  0  0  0  0  0  0  0  0  0  0
    1.0374    1.9945    0.0000 C   0  0  0  0  0  0  0  0  0  0  0  0
    0.7143   -0.9845    0.0000 N   0  0  0  0  0  0  0  0  0  0  0  0
    1.4895   -0.7023    0.0000 C   0  0  0  0  0  0  0  0  0  0  0  0
    1.6328    0.1102    0.0000 C   0  0  0  0  0  0  0  0  0  0  0  0
    1.0008    0.6405    0.0000 C   0  0  0  0  0  0  0  0  0  0  0  0
    1.1441    1.4529    0.0000 C   0  0  0  0  0  0  0  0  0  0  0  0
    0.2256    0.3583    0.0000 C   0  0  0  0  0  0  0  0  0  0  0  0
    2.4081    0.3923    0.0000 C   0  0  0  0  0  0  0  0  0  0  0  0
    3.0400   -0.1380    0.0000 C   0  0  0  0  0  0  0  0  0  0  0  0
    2.8968   -0.9504    0.0000 C   0  0  0  0  0  0  0  0  0  0  0  0
    2.1215   -1.2326    0.0000 C   0  0  0  0  0  0  0  0  0  0  0  0
    1.9783   -2.0451    0.0000 C   0  0  0  0  0  0  0  0  0  0  0  0
    1.2030   -2.3272    0.0000 C   0  0  0  0  0  0  0  0  0  0  0  0
    2.6103   -2.5754    0.0000 C   0  0  0  0  0  0  0  0  0  0  0  0
   -2.0355   -1.7213    0.0000 N   0  0  0  0  0  0  0  0  0  0  0  0
   -1.8923   -2.5337    0.0000 C   0  0  0  0  0  0  0  0  0  0  0  0
   -2.6067   -2.9462    0.0000 C   0  0  0  0  0  0  0  0  0  0  0  0
   -3.3212   -2.5337    0.0000 C   0  0  0  0  0  0  0  0  0  0  0  0
   -3.3212   -1.7087    0.0000 C   0  0  0  0  0  0  0  0  0  0  0  0
   -4.0357   -2.9462    0.0000 C   0  0  0  0  0  0  0  0  0  0  0  0
   -2.6067   -3.7712    0.0000 C   0  0  0  0  0  0  0  0  0  0  0  0
   -1.8923   -4.1837    0.0000 C   0  0  0  0  0  0  0  0  0  0  0  0
   -1.1778   -3.7712    0.0000 C   0  0  0  0  0  0  0  0  0  0  0  0
   -1.1778   -2.9462    0.0000 C   0  0  0  0  0  0  0  0  0  0  0  0
   -0.4633   -2.5337    0.0000 C   0  0  0  0  0  0  0  0  0  0  0  0
   -0.4633   -1.7087    0.0000 C   0  0  0  0  0  0  0  0  0  0  0  0
    0.2512   -2.9462    0.0000 C   0  0  0  0  0  0  0  0  0  0  0  0
  3  4  1  0      
  4  5  1  0      
  4  6  1  0      
  6  7  1  0      
  7  8  2  0      
  8  9  1  0      
  9 10  2  0      
 10 11  1  0      
 11 12  1  0      
 11 13  1  0      
  6 14  2  0      
 10 14  1  0      
 14 15  1  0      
 15 16  2  0      
 16 17  2  0      
 17 18  1  0      
 18 19  2  0      
 19 20  1  0      
 20 21  1  0      
 20 22  1  0      
 19 23  1  0      
 23 24  2  0      
 24 25  1  0      
 25 26  2  0      
 18 26  1  0      
 26 27  1  0      
 27 28  1  0      
 27 29  1  0      
 16 30  2  0      
 30 31  1  0      
 31 32  2  0      
 32 33  1  0      
 33 34  1  0      
 33 35  1  0      
 32 36  1  0      
 36 37  2  0      
 37 38  1  0      
 38 39  2  0      
 31 39  1  0      
 39 40  1  0      
 40 41  1  0      
 40 42  1  0      
 16 43  2  0      
 43 44  1  0      
 44 45  2  0      
 45 46  1  0      
 46 47  1  0      
 46 48  1  0      
 45 49  1  0      
 49 50  2  0      
 50 51  1  0      
 51 52  2  0      
 44 52  1  0      
 52 53  1  0      
 53 54  1  0      
 53 55  1  0      
M  CHG  3   1   1   2   1  16  -2
M  STY  1   1 SUP
M  SLB  1   1   1
M  SAL   1  2   1   2
M  SMT   1 [Li\S^+\n]2
M  END
