# Supplementary material for: Elucidating bonding preferences in tetrakis(imido)uranate(VI) dianions
Source: Springer Nature journal article supplement (doi:10.1038/nchem.2767), 2017-04-24
Supplement: 41557_2017_BFnchem2767_MOESM10_ESM.cif [file 41557_2017_BFnchem2767_MOESM10_ESM.cif]

data_global

loop_
_publ_author_name
_publ_author_address
_publ_author_footnote

        'Anderson, Nickolas'
;       Department of Chemistry
        Purdue University
        560 Oval Dr.
        W. Lafayette
        IN 47907-2084
        USA
;
;?
;

        'Bart, Suzanne C.'
;       Department of Chemistry
        Purdue University
        560 Oval Dr.
        W. Lafayette
        IN 47907-2084
        USA
;
;?
;

        'Fanwick, Phillip E.'
;       Department of Chemistry
        Purdue University
        560 Oval Dr.
        W. Lafayette
        IN 47907-2084
        USA
;
;?
;


_publ_section_references
;
Allen, F. H., Johnson, O., Shields, G. P., Smith, B. R., Towler, M. (2004). 
J. Appl. Cryst., 37, 335--338.

H�bschle, C. B., Sheldrick, G. M. and Dittrich, B. (2011). J. Appl. Cryst., 
44, 1281--1284.

Nonius (1998). Collect Users Manual, Nonius Delft, The Netherlands.

Otwinowski Z. & Minor, W. (1997). Methods Enzymol., 276, 307--327.

Prince, E. and Nicholson, W. L. (1983). Acta Cryst., A39, 407--410.

Rigaku Corp. (2001). CrystalClear, The Woodlands, Texas, USA.

Sheldrick, G.M. (2008). Acta Cryst., A64, 112--122.

Sheldrick, G. M. (2013). SHELXL2013. University of G\"ottingen, Germany.

Spek, A. L. (2003). J. Appl. Cryst., 36, 7--13.

CSD: Groom, C. R. & Allen, F. H. (2014). Angew. Chem. Int. Ed., 53, 662--671.

Publcif: Westrip, S. P. (2010). J. Appl. Cryst., 43, 920-�925.
;

data_nha61_2016
 
_audit_creation_method            'SHELXL-2014/7'
_shelx_SHELXL_version_number      '2014/7'
_chemical_name_systematic         ?
_chemical_name_common             ?
_chemical_melting_point           ?
_chemical_formula_moiety          ?
_chemical_formula_sum
 'C60 H96 N4 Na2 O3 U' 
_chemical_formula_weight          1205.41

loop_
 _atom_type_symbol
 _atom_type_description
 _atom_type_scat_dispersion_real
 _atom_type_scat_dispersion_imag
 _atom_type_scat_source
 'C'  'C'   0.0033   0.0016
 'International Tables Vol C Tables 4.2.6.8 and 6.1.1.4'
 'H'  'H'   0.0000   0.0000
 'International Tables Vol C Tables 4.2.6.8 and 6.1.1.4'
 'N'  'N'   0.0061   0.0033
 'International Tables Vol C Tables 4.2.6.8 and 6.1.1.4'
 'O'  'O'   0.0106   0.0060
 'International Tables Vol C Tables 4.2.6.8 and 6.1.1.4'
 'Na'  'Na'   0.0362   0.0249
 'International Tables Vol C Tables 4.2.6.8 and 6.1.1.4'
 'U'  'U'  -9.6767   9.6646
 'International Tables Vol C Tables 4.2.6.8 and 6.1.1.4'
 
_space_group_crystal_system       monoclinic
_space_group_IT_number            14
_space_group_name_H-M_alt         'P 21/n'
_space_group_name_Hall            '-P 2yn'
 
_shelx_space_group_comment
;
The symmetry employed for this shelxl refinement is uniquely defined
by the following loop, which should always be used as a source of
symmetry information in preference to the above space-group names.
They are only intended as comments.
;
 
loop_
 _space_group_symop_operation_xyz
 'x, y, z'
 '-x+1/2, y+1/2, -z+1/2'
 '-x, -y, -z'
 'x-1/2, -y-1/2, z-1/2'
 
_cell_length_a                    14.7552(2)
_cell_length_b                    20.6750(5)
_cell_length_c                    20.3540(3)
_cell_angle_alpha                 90
_cell_angle_beta                  105.1390(10)
_cell_angle_gamma                 90
_cell_volume                      5993.77(19)
_cell_formula_units_Z             4
_cell_measurement_temperature     150(2)
_cell_measurement_reflns_used     37582
_cell_measurement_theta_min       2.205
_cell_measurement_theta_max       28.248
 
_exptl_crystal_description        chunk
_exptl_crystal_colour             'brown'
_exptl_crystal_density_meas       ?
_exptl_crystal_density_method     ?
_exptl_crystal_density_diffrn     1.336          
_exptl_crystal_F_000              2488
_exptl_transmission_factor_min    ?
_exptl_transmission_factor_max    ?
_exptl_crystal_size_max           0.700
_exptl_crystal_size_mid           0.700
_exptl_crystal_size_min           0.600
_exptl_absorpt_coefficient_mu     2.767
_shelx_estimated_absorpt_T_min    0.248
_shelx_estimated_absorpt_T_max    0.288
_exptl_absorpt_correction_type    multi-scan
_exptl_absorpt_correction_T_min   0.023 
_exptl_absorpt_correction_T_max   0.190 
_exptl_absorpt_process_details    'SCALEPACK (Otwinowski & Minor, 1997)'
_exptl_absorpt_special_details    ?
_diffrn_ambient_temperature       150(2)
_diffrn_radiation_wavelength      0.71073
_diffrn_radiation_type            MoK\a
_diffrn_source                    'fine focus tube'
_diffrn_measurement_device_type   'Nonius KappaCCD'
_diffrn_measurement_method        '\w and \f'
_diffrn_detector_area_resol_mean  ?
_diffrn_reflns_number             22899
_diffrn_reflns_av_unetI/netI      0.0745
_diffrn_reflns_av_R_equivalents   0.0564
_diffrn_reflns_limit_h_min        -19
_diffrn_reflns_limit_h_max        19
_diffrn_reflns_limit_k_min        -27
_diffrn_reflns_limit_k_max        25
_diffrn_reflns_limit_l_min        -26
_diffrn_reflns_limit_l_max        26
_diffrn_reflns_theta_min          2.205
_diffrn_reflns_theta_max          28.248
_diffrn_reflns_theta_full         25.242
_diffrn_measured_fraction_theta_max   0.951
_diffrn_measured_fraction_theta_full  0.962
_diffrn_reflns_Laue_measured_fraction_max    0.951
_diffrn_reflns_Laue_measured_fraction_full   0.962
_diffrn_reflns_point_group_measured_fraction_max   0.951
_diffrn_reflns_point_group_measured_fraction_full  0.962
_reflns_number_total              14103
_reflns_number_gt                 10407
_reflns_threshold_expression      'I > 2\s(I)'
_reflns_Friedel_coverage          0.000
_reflns_Friedel_fraction_max      .
_reflns_Friedel_fraction_full     .
 
_reflns_special_details
;
 Reflections were merged by SHELXL according to the crystal
 class for the calculation of statistics and refinement.
 
 _reflns_Friedel_fraction is defined as the number of unique
 Friedel pairs measured divided by the number that would be
 possible theoretically, ignoring centric projections and
 systematic absences.
;
 
_computing_data_collection        'Nonius Collect (Nonius, 1998)'
_computing_cell_refinement        'HKL3000 (Otwinowski & Minor, 1997)'
_computing_data_reduction         'HKL3000 (Otwinowski & Minor, 1997)'
_computing_structure_solution     'SHELXT (Sheldrick)'
_computing_structure_refinement 
;  
SHELXL-2014/7 (Sheldrick, 2014), 
SHELXLE Rev714 (H\"ubschle et al., 2011)
; 
_computing_molecular_graphics     ?
_computing_publication_material   'local programs'

_refine_special_details          
; 
A coordinated THF molecule was refined as disordered over two mutually 
exclusive orientations. The geometries of the THF rings were
restrained to be similar, and Uij components of ADPs were restrained to 
be similar for atoms closer than 1.7 Angstrom. Subject to these conditions 
the occupancy rates refined to 0.387(12) to 0.613(12).
;
_refine_ls_structure_factor_coef  Fsqd
_refine_ls_matrix_type            full
_refine_ls_weighting_scheme       calc
_refine_ls_weighting_details
'w=1/[\s^2^(Fo^2^)+(0.0195P)^2^] where P=(Fo^2^+2Fc^2^)/3'
_atom_sites_solution_primary      iterative
_atom_sites_solution_secondary    difmap
_atom_sites_solution_hydrogens    geom
_refine_ls_hydrogen_treatment     constr
_refine_ls_extinction_method      none
_refine_ls_extinction_coef        .
_refine_ls_number_reflns          14103
_refine_ls_number_parameters      697
_refine_ls_number_restraints      160
_refine_ls_R_factor_all           0.0609
_refine_ls_R_factor_gt            0.0325
_refine_ls_wR_factor_ref          0.0653
_refine_ls_wR_factor_gt           0.0584
_refine_ls_goodness_of_fit_ref    0.999
_refine_ls_restrained_S_all       0.996
_refine_ls_shift/su_max           0.005
_refine_ls_shift/su_mean          0.000
 
loop_
 _atom_site_label
 _atom_site_type_symbol
 _atom_site_fract_x
 _atom_site_fract_y
 _atom_site_fract_z
 _atom_site_U_iso_or_equiv
 _atom_site_adp_type
 _atom_site_occupancy
 _atom_site_site_symmetry_order  
 _atom_site_calc_flag
 _atom_site_refinement_flags_posn
 _atom_site_refinement_flags_adp
 _atom_site_refinement_flags_occupancy
 _atom_site_disorder_assembly
 _atom_site_disorder_group
C1 C 0.2438(3) 0.57174(19) 0.84084(18) 0.0367(9) Uani 1 1 d . . . . .
H1A H 0.3052 0.5620 0.8319 0.044 Uiso 1 1 calc R U . . .
H1B H 0.2038 0.5329 0.8287 0.044 Uiso 1 1 calc R U . . .
C2 C 0.2587(3) 0.5854(2) 0.91537(19) 0.0436(10) Uani 1 1 d . . . . .
H2A H 0.2944 0.6256 0.9271 0.065 Uiso 1 1 calc R U . . .
H2B H 0.2938 0.5497 0.9420 0.065 Uiso 1 1 calc R U . . .
H2C H 0.1978 0.5898 0.9257 0.065 Uiso 1 1 calc R U . . .
C3 C 0.1017(3) 0.6296(2) 0.7904(2) 0.0420(10) Uani 1 1 d . . . . .
H3A H 0.0889 0.6304 0.8358 0.050 Uiso 1 1 calc R U . . .
H3B H 0.0695 0.5915 0.7652 0.050 Uiso 1 1 calc R U . . .
C4 C 0.0662(4) 0.6897(2) 0.7527(2) 0.0552(12) Uani 1 1 d . . . . .
H4A H 0.0958 0.7272 0.7791 0.083 Uiso 1 1 calc R U . . .
H4B H -0.0020 0.6922 0.7454 0.083 Uiso 1 1 calc R U . . .
H4C H 0.0813 0.6893 0.7086 0.083 Uiso 1 1 calc R U . . .
C5 C 0.8372(3) 0.7845(2) 0.6884(2) 0.0419(10) Uani 1 1 d . . . . .
H5A H 0.8945 0.7945 0.6737 0.050 Uiso 1 1 calc R U . . .
H5B H 0.8255 0.7375 0.6827 0.050 Uiso 1 1 calc R U . . .
C6 C 0.8536(3) 0.8018(2) 0.7624(2) 0.0473(11) Uani 1 1 d . . . . .
H6A H 0.8600 0.8488 0.7678 0.071 Uiso 1 1 calc R U . . .
H6B H 0.9111 0.7808 0.7889 0.071 Uiso 1 1 calc R U . . .
H6C H 0.8002 0.7871 0.7788 0.071 Uiso 1 1 calc R U . . .
C7 C 0.7826(3) 0.8808(2) 0.6243(2) 0.0486(11) Uani 1 1 d . . . . .
H7A H 0.8257 0.8755 0.5947 0.058 Uiso 1 1 calc R U . . .
H7B H 0.8151 0.9066 0.6645 0.058 Uiso 1 1 calc R U . . .
C8 C 0.6961(3) 0.9151(2) 0.5863(2) 0.0438(10) Uani 1 1 d . . . . .
H8A H 0.6626 0.8886 0.5477 0.066 Uiso 1 1 calc R U . . .
H8B H 0.7134 0.9566 0.5695 0.066 Uiso 1 1 calc R U . . .
H8C H 0.6555 0.9229 0.6167 0.066 Uiso 1 1 calc R U . . .
C10 C 0.6451(2) 0.64445(15) 0.61682(15) 0.0185(7) Uani 1 1 d . . . . .
C11 C 0.6823(2) 0.65836(17) 0.55948(16) 0.0239(7) Uani 1 1 d . . . . .
C12 C 0.7711(3) 0.6362(2) 0.55938(18) 0.0337(9) Uani 1 1 d . . . . .
H12 H 0.7939 0.6441 0.5205 0.040 Uiso 1 1 calc R U . . .
C13 C 0.8273(3) 0.6032(2) 0.6137(2) 0.0382(10) Uani 1 1 d . . . . .
H13 H 0.8879 0.5887 0.6124 0.046 Uiso 1 1 calc R U . . .
C14 C 0.7940(3) 0.59155(17) 0.67030(18) 0.0284(8) Uani 1 1 d . . . . .
H14 H 0.8328 0.5692 0.7081 0.034 Uiso 1 1 calc R U . . .
C15 C 0.7049(2) 0.61182(15) 0.67300(16) 0.0202(7) Uani 1 1 d . . . . .
C16 C 0.6234(2) 0.69411(18) 0.49753(16) 0.0265(7) Uani 1 1 d . . . . .
H16 H 0.5701 0.7155 0.5110 0.032 Uiso 1 1 calc R U . . .
C17 C 0.6730(2) 0.60094(16) 0.73724(16) 0.0240(7) Uani 1 1 d . . . . .
H17 H 0.6044 0.5906 0.7228 0.029 Uiso 1 1 calc R U . . .
C20 C 0.1849(2) 0.71465(16) 0.59555(14) 0.0171(6) Uani 1 1 d . . . . .
C21 C 0.1539(2) 0.77918(16) 0.60511(15) 0.0214(7) Uani 1 1 d . . . . .
C22 C 0.0583(3) 0.79196(17) 0.59086(17) 0.0258(8) Uani 1 1 d . . . . .
H22 H 0.0382 0.8345 0.5976 0.031 Uiso 1 1 calc R U . . .
C23 C -0.0083(2) 0.74477(19) 0.56729(17) 0.0291(8) Uani 1 1 d . . . . .
H23 H -0.0733 0.7548 0.5576 0.035 Uiso 1 1 calc R U . . .
C24 C 0.0206(2) 0.68264(18) 0.55792(16) 0.0250(7) Uani 1 1 d . . . . .
H24 H -0.0254 0.6502 0.5417 0.030 Uiso 1 1 calc R U . . .
C25 C 0.1155(2) 0.66621(16) 0.57161(15) 0.0212(7) Uani 1 1 d . . . . .
C26 C 0.2242(3) 0.83073(17) 0.63240(18) 0.0291(8) Uani 1 1 d . . . . .
H26 H 0.2848 0.8169 0.6234 0.035 Uiso 1 1 calc R U . . .
C27 C 0.1418(2) 0.59641(16) 0.56296(16) 0.0245(7) Uani 1 1 d . . . . .
H27 H 0.2114 0.5941 0.5703 0.029 Uiso 1 1 calc R U . . .
C30 C 0.4614(2) 0.61761(15) 0.78458(14) 0.0179(6) Uani 1 1 d . . . . .
C31 C 0.4689(2) 0.54921(16) 0.78596(15) 0.0206(7) Uani 1 1 d . . . . .
C32 C 0.4961(3) 0.51708(18) 0.84819(17) 0.0293(8) Uani 1 1 d . . . . .
H32 H 0.5024 0.4713 0.8488 0.035 Uiso 1 1 calc R U . . .
C33 C 0.5142(3) 0.55056(19) 0.90911(17) 0.0359(9) Uani 1 1 d . . . . .
H33 H 0.5326 0.5280 0.9512 0.043 Uiso 1 1 calc R U . . .
C34 C 0.5053(3) 0.61655(18) 0.90807(16) 0.0306(8) Uani 1 1 d . . . . .
H34 H 0.5173 0.6392 0.9501 0.037 Uiso 1 1 calc R U . . .
C35 C 0.4792(3) 0.65159(17) 0.84756(16) 0.0243(7) Uani 1 1 d . . . . .
C36 C 0.4449(3) 0.51172(17) 0.71890(16) 0.0269(8) Uani 1 1 d . . . . .
H36 H 0.4638 0.5395 0.6845 0.032 Uiso 1 1 calc R U . . .
C37 C 0.4712(3) 0.72460(18) 0.84970(17) 0.0298(8) Uani 1 1 d . . . . .
H37 H 0.4621 0.7410 0.8022 0.036 Uiso 1 1 calc R U . . .
C40 C 0.4543(2) 0.85094(15) 0.61614(15) 0.0179(6) Uani 1 1 d . . . . .
C41 C 0.4300(2) 0.87118(16) 0.54666(16) 0.0215(7) Uani 1 1 d . . . . .
C42 C 0.4289(3) 0.93662(17) 0.53130(17) 0.0293(8) Uani 1 1 d . . . . .
H42 H 0.4122 0.9496 0.4849 0.035 Uiso 1 1 calc R U . . .
C43 C 0.4512(3) 0.98308(17) 0.58090(19) 0.0339(9) Uani 1 1 d . . . . .
H43 H 0.4499 1.0276 0.5691 0.041 Uiso 1 1 calc R U . . .
C44 C 0.4756(3) 0.96404(17) 0.64861(18) 0.0292(8) Uani 1 1 d . . . . .
H44 H 0.4920 0.9961 0.6831 0.035 Uiso 1 1 calc R U . . .
C45 C 0.4767(2) 0.89960(16) 0.66739(16) 0.0221(7) Uani 1 1 d . . . . .
C46 C 0.4032(3) 0.82107(17) 0.49024(16) 0.0272(8) Uani 1 1 d . . . . .
H46 H 0.4311 0.7788 0.5093 0.033 Uiso 1 1 calc R U . . .
C47 C 0.5057(3) 0.88011(17) 0.74230(16) 0.0263(8) Uani 1 1 d . . . . .
H47 H 0.4712 0.8394 0.7469 0.032 Uiso 1 1 calc R U . . .
O3 O 0.371(5) 0.6143(14) 0.5246(14) 0.038(2) Uani 0.387(12) 1 d D U P A 1
C50 C 0.4181(11) 0.5537(10) 0.5194(9) 0.042(2) Uani 0.387(12) 1 d D U P A 1
H50A H 0.4393 0.5319 0.5641 0.050 Uiso 0.387(12) 1 calc R U P A 1
H50B H 0.4721 0.5597 0.4997 0.050 Uiso 0.387(12) 1 calc R U P A 1
C51 C 0.3380(10) 0.5169(6) 0.4711(7) 0.051(2) Uani 0.387(12) 1 d D U P A 1
H51A H 0.2843 0.5092 0.4909 0.061 Uiso 0.387(12) 1 calc R U P A 1
H51B H 0.3589 0.4756 0.4552 0.061 Uiso 0.387(12) 1 calc R U P A 1
C52 C 0.3162(13) 0.5712(9) 0.4133(9) 0.049(3) Uani 0.387(12) 1 d D U P A 1
H52A H 0.3638 0.5712 0.3868 0.059 Uiso 0.387(12) 1 calc R U P A 1
H52B H 0.2530 0.5657 0.3820 0.059 Uiso 0.387(12) 1 calc R U P A 1
C53 C 0.322(2) 0.6338(9) 0.4568(15) 0.040(3) Uani 0.387(12) 1 d D U P A 1
H53A H 0.3571 0.6682 0.4399 0.048 Uiso 0.387(12) 1 calc R U P A 1
H53B H 0.2587 0.6501 0.4556 0.048 Uiso 0.387(12) 1 calc R U P A 1
O3B O 0.371(3) 0.6162(9) 0.5204(9) 0.0373(18) Uani 0.613(12) 1 d D U P A 2
C50B C 0.3939(8) 0.5491(6) 0.5191(5) 0.044(2) Uani 0.613(12) 1 d D U P A 2
H50C H 0.3564 0.5234 0.5435 0.053 Uiso 0.613(12) 1 calc R U P A 2
H50D H 0.4613 0.5424 0.5418 0.053 Uiso 0.613(12) 1 calc R U P A 2
C51B C 0.3730(6) 0.5280(4) 0.4462(4) 0.0384(17) Uani 0.613(12) 1 d D U P A 2
H51C H 0.3538 0.4820 0.4406 0.046 Uiso 0.613(12) 1 calc R U P A 2
H51D H 0.4273 0.5351 0.4269 0.046 Uiso 0.613(12) 1 calc R U P A 2
C52B C 0.2898(8) 0.5743(6) 0.4139(6) 0.051(2) Uani 0.613(12) 1 d D U P A 2
H52C H 0.2882 0.5838 0.3659 0.061 Uiso 0.613(12) 1 calc R U P A 2
H52D H 0.2292 0.5546 0.4153 0.061 Uiso 0.613(12) 1 calc R U P A 2
C53B C 0.3085(12) 0.6368(6) 0.4573(10) 0.040(2) Uani 0.613(12) 1 d D U P A 2
H53C H 0.3383 0.6704 0.4352 0.048 Uiso 0.613(12) 1 calc R U P A 2
H53D H 0.2494 0.6543 0.4646 0.048 Uiso 0.613(12) 1 calc R U P A 2
C161 C 0.6789(3) 0.7466(2) 0.4719(2) 0.0485(11) Uani 1 1 d . . . . .
H16A H 0.7287 0.7265 0.4552 0.073 Uiso 1 1 calc R U . . .
H16B H 0.7070 0.7762 0.5093 0.073 Uiso 1 1 calc R U . . .
H16C H 0.6367 0.7708 0.4349 0.073 Uiso 1 1 calc R U . . .
C162 C 0.5825(4) 0.6476(3) 0.4404(2) 0.0734(17) Uani 1 1 d . . . . .
H16D H 0.6331 0.6223 0.4300 0.110 Uiso 1 1 calc R U . . .
H16E H 0.5494 0.6719 0.3999 0.110 Uiso 1 1 calc R U . . .
H16F H 0.5384 0.6185 0.4542 0.110 Uiso 1 1 calc R U . . .
C171 C 0.6843(3) 0.66309(19) 0.77960(17) 0.0326(8) Uani 1 1 d . . . . .
H17A H 0.7503 0.6765 0.7916 0.049 Uiso 1 1 calc R U . . .
H17B H 0.6644 0.6552 0.8212 0.049 Uiso 1 1 calc R U . . .
H17C H 0.6455 0.6973 0.7530 0.049 Uiso 1 1 calc R U . . .
C172 C 0.7216(3) 0.5454(2) 0.78158(19) 0.0382(9) Uani 1 1 d . . . . .
H17D H 0.7191 0.5066 0.7536 0.057 Uiso 1 1 calc R U . . .
H17E H 0.6898 0.5369 0.8174 0.057 Uiso 1 1 calc R U . . .
H17F H 0.7873 0.5569 0.8024 0.057 Uiso 1 1 calc R U . . .
C261 C 0.2416(4) 0.8376(2) 0.7097(2) 0.0515(12) Uani 1 1 d . . . . .
H26D H 0.1814 0.8420 0.7211 0.077 Uiso 1 1 calc R U . . .
H26E H 0.2801 0.8760 0.7252 0.077 Uiso 1 1 calc R U . . .
H26F H 0.2745 0.7991 0.7321 0.077 Uiso 1 1 calc R U . . .
C262 C 0.1999(3) 0.89721(19) 0.5993(2) 0.0432(10) Uani 1 1 d . . . . .
H26A H 0.1807 0.8924 0.5497 0.065 Uiso 1 1 calc R U . . .
H26B H 0.2550 0.9255 0.6123 0.065 Uiso 1 1 calc R U . . .
H26C H 0.1482 0.9163 0.6148 0.065 Uiso 1 1 calc R U . . .
C271 C 0.1144(3) 0.55184(19) 0.61516(19) 0.0376(9) Uani 1 1 d . . . . .
H27A H 0.1418 0.5684 0.6612 0.056 Uiso 1 1 calc R U . . .
H27B H 0.1381 0.5081 0.6113 0.056 Uiso 1 1 calc R U . . .
H27C H 0.0459 0.5506 0.6063 0.056 Uiso 1 1 calc R U . . .
C272 C 0.0952(3) 0.5705(2) 0.49140(18) 0.0397(9) Uani 1 1 d . . . . .
H27D H 0.0269 0.5703 0.4841 0.060 Uiso 1 1 calc R U . . .
H27E H 0.1171 0.5263 0.4871 0.060 Uiso 1 1 calc R U . . .
H27F H 0.1119 0.5983 0.4573 0.060 Uiso 1 1 calc R U . . .
C361 C 0.4988(3) 0.4478(2) 0.7226(2) 0.0491(11) Uani 1 1 d . . . . .
H36D H 0.4733 0.4161 0.7488 0.074 Uiso 1 1 calc R U . . .
H36E H 0.5654 0.4551 0.7448 0.074 Uiso 1 1 calc R U . . .
H36F H 0.4922 0.4312 0.6764 0.074 Uiso 1 1 calc R U . . .
C362 C 0.3421(3) 0.5008(2) 0.6938(2) 0.0411(10) Uani 1 1 d . . . . .
H36A H 0.3206 0.4745 0.7268 0.062 Uiso 1 1 calc R U . . .
H36B H 0.3285 0.4782 0.6500 0.062 Uiso 1 1 calc R U . . .
H36C H 0.3094 0.5425 0.6880 0.062 Uiso 1 1 calc R U . . .
C371 C 0.5591(3) 0.7566(2) 0.8940(2) 0.0379(9) Uani 1 1 d . . . . .
H37A H 0.5709 0.7404 0.9407 0.057 Uiso 1 1 calc R U . . .
H37B H 0.5500 0.8036 0.8937 0.057 Uiso 1 1 calc R U . . .
H37C H 0.6129 0.7464 0.8760 0.057 Uiso 1 1 calc R U . . .
C372 C 0.3853(3) 0.7458(2) 0.87415(19) 0.0374(9) Uani 1 1 d . . . . .
H37D H 0.3286 0.7256 0.8455 0.056 Uiso 1 1 calc R U . . .
H37E H 0.3790 0.7930 0.8709 0.056 Uiso 1 1 calc R U . . .
H37F H 0.3938 0.7324 0.9215 0.056 Uiso 1 1 calc R U . . .
C461 C 0.2966(3) 0.8123(2) 0.46674(18) 0.0386(9) Uani 1 1 d . . . . .
H46A H 0.2738 0.7948 0.5043 0.058 Uiso 1 1 calc R U . . .
H46B H 0.2809 0.7822 0.4282 0.058 Uiso 1 1 calc R U . . .
H46C H 0.2667 0.8542 0.4527 0.058 Uiso 1 1 calc R U . . .
C462 C 0.4417(3) 0.8372(2) 0.42854(19) 0.0420(10) Uani 1 1 d . . . . .
H46D H 0.4145 0.8781 0.4082 0.063 Uiso 1 1 calc R U . . .
H46E H 0.4249 0.8026 0.3947 0.063 Uiso 1 1 calc R U . . .
H46F H 0.5102 0.8413 0.4436 0.063 Uiso 1 1 calc R U . . .
C471 C 0.4800(3) 0.9305(2) 0.78921(18) 0.0418(10) Uani 1 1 d . . . . .
H47A H 0.4909 0.9126 0.8352 0.063 Uiso 1 1 calc R U . . .
H47B H 0.4137 0.9422 0.7720 0.063 Uiso 1 1 calc R U . . .
H47C H 0.5190 0.9691 0.7905 0.063 Uiso 1 1 calc R U . . .
C472 C 0.6094(3) 0.8652(2) 0.76513(19) 0.0474(11) Uani 1 1 d . . . . .
H47D H 0.6225 0.8257 0.7427 0.071 Uiso 1 1 calc R U . . .
H47E H 0.6281 0.8591 0.8146 0.071 Uiso 1 1 calc R U . . .
H47F H 0.6449 0.9013 0.7529 0.071 Uiso 1 1 calc R U . . .
N1 N 0.55617(18) 0.66390(13) 0.61792(12) 0.0172(5) Uani 1 1 d . . . . .
N2 N 0.28031(18) 0.70013(12) 0.61033(12) 0.0166(5) Uani 1 1 d . . . . .
N3 N 0.43631(19) 0.65023(13) 0.72323(12) 0.0185(6) Uani 1 1 d . . . . .
N4 N 0.45541(19) 0.78636(13) 0.63152(12) 0.0176(5) Uani 1 1 d . . . . .
O1 O 0.7586(2) 0.81915(13) 0.64552(13) 0.0374(6) Uani 1 1 d . . . . .
O2 O 0.20042(19) 0.62487(13) 0.79784(12) 0.0340(6) Uani 1 1 d . . . . .
Na1 Na 0.61526(11) 0.77528(7) 0.62713(8) 0.0351(3) Uani 1 1 d . . . . .
Na2 Na 0.27687(10) 0.67039(7) 0.72558(7) 0.0345(4) Uani 1 1 d . . . . .
U1 U 0.42357(2) 0.68880(2) 0.62799(2) 0.01284(4) Uani 1 1 d . . . . .
 
loop_
 _atom_site_aniso_label
 _atom_site_aniso_U_11
 _atom_site_aniso_U_22
 _atom_site_aniso_U_33
 _atom_site_aniso_U_23
 _atom_site_aniso_U_13
 _atom_site_aniso_U_12
C1 0.041(2) 0.034(2) 0.039(2) 0.0076(17) 0.0163(19) 0.0051(19)
C2 0.042(3) 0.051(3) 0.039(2) 0.0085(19) 0.013(2) 0.002(2)
C3 0.035(2) 0.051(3) 0.045(2) 0.010(2) 0.020(2) 0.003(2)
C4 0.047(3) 0.065(3) 0.057(3) 0.018(3) 0.019(2) 0.017(3)
C5 0.030(2) 0.039(2) 0.053(2) 0.0004(19) 0.006(2) 0.009(2)
C6 0.043(3) 0.043(3) 0.052(2) 0.005(2) 0.005(2) -0.007(2)
C7 0.042(3) 0.039(3) 0.063(3) -0.001(2) 0.011(2) -0.010(2)
C8 0.044(3) 0.041(3) 0.044(2) 0.0060(19) 0.008(2) 0.007(2)
C10 0.0174(16) 0.0172(16) 0.0222(15) -0.0072(12) 0.0074(14) -0.0052(13)
C11 0.0224(18) 0.0257(18) 0.0265(17) -0.0012(14) 0.0116(15) 0.0002(15)
C12 0.026(2) 0.046(2) 0.0348(19) 0.0055(17) 0.0179(17) 0.0068(18)
C13 0.022(2) 0.046(2) 0.052(2) 0.0077(19) 0.0192(19) 0.0111(18)
C14 0.0192(18) 0.032(2) 0.0351(18) 0.0069(15) 0.0081(16) 0.0039(16)
C15 0.0162(17) 0.0186(17) 0.0250(15) -0.0035(13) 0.0040(14) -0.0010(13)
C16 0.0242(18) 0.033(2) 0.0245(15) 0.0016(15) 0.0102(15) 0.0012(17)
C17 0.0198(18) 0.0266(19) 0.0244(16) 0.0051(14) 0.0038(15) 0.0018(15)
C20 0.0140(16) 0.0237(17) 0.0137(13) 0.0048(12) 0.0036(13) 0.0008(13)
C21 0.0195(17) 0.0233(18) 0.0223(15) 0.0037(13) 0.0072(14) 0.0035(14)
C22 0.0208(18) 0.029(2) 0.0273(17) 0.0032(14) 0.0063(15) 0.0071(15)
C23 0.0150(17) 0.044(2) 0.0301(17) 0.0060(16) 0.0081(15) 0.0067(16)
C24 0.0121(15) 0.036(2) 0.0257(15) 0.0058(15) 0.0027(13) -0.0044(15)
C25 0.0161(17) 0.0298(18) 0.0173(14) 0.0052(13) 0.0039(13) -0.0026(14)
C26 0.0220(19) 0.027(2) 0.039(2) -0.0021(15) 0.0088(17) 0.0043(15)
C27 0.0194(18) 0.0258(19) 0.0280(17) 0.0015(14) 0.0054(15) -0.0078(15)
C30 0.0127(15) 0.0226(17) 0.0180(14) 0.0041(12) 0.0031(13) 0.0011(13)
C31 0.0191(17) 0.0208(17) 0.0213(15) 0.0023(13) 0.0042(14) 0.0008(14)
C32 0.027(2) 0.026(2) 0.0358(19) 0.0099(15) 0.0094(17) 0.0043(16)
C33 0.045(2) 0.041(2) 0.0217(16) 0.0125(16) 0.0079(17) 0.0050(19)
C34 0.036(2) 0.037(2) 0.0174(15) 0.0015(14) 0.0047(16) 0.0008(18)
C35 0.0251(19) 0.0255(19) 0.0222(16) 0.0019(14) 0.0060(15) -0.0023(15)
C36 0.030(2) 0.0232(19) 0.0262(17) -0.0019(14) 0.0051(16) 0.0017(16)
C37 0.038(2) 0.030(2) 0.0222(16) -0.0055(15) 0.0090(16) -0.0007(17)
C40 0.0148(16) 0.0168(16) 0.0222(15) 0.0003(12) 0.0050(13) -0.0014(13)
C41 0.0201(17) 0.0204(17) 0.0244(16) 0.0022(13) 0.0063(14) 0.0044(14)
C42 0.035(2) 0.0254(19) 0.0294(17) 0.0088(15) 0.0122(16) 0.0050(17)
C43 0.040(2) 0.0162(18) 0.052(2) 0.0089(16) 0.024(2) 0.0019(17)
C44 0.032(2) 0.0206(18) 0.0403(19) -0.0024(15) 0.0182(18) 0.0003(16)
C45 0.0185(17) 0.0211(17) 0.0271(16) -0.0017(13) 0.0067(15) -0.0012(14)
C46 0.029(2) 0.029(2) 0.0203(15) 0.0025(14) 0.0017(15) -0.0002(16)
C47 0.030(2) 0.0245(19) 0.0249(16) -0.0053(14) 0.0074(16) 0.0024(16)
O3 0.036(4) 0.038(4) 0.032(4) -0.014(4) -0.004(4) 0.009(4)
C50 0.040(5) 0.041(4) 0.037(4) -0.015(4) -0.003(4) 0.014(4)
C51 0.046(5) 0.046(4) 0.052(4) -0.015(4) -0.001(4) 0.010(4)
C52 0.044(5) 0.050(4) 0.045(4) -0.015(4) -0.004(4) 0.013(4)
C53 0.038(5) 0.038(4) 0.038(4) -0.007(4) -0.001(4) 0.010(4)
O3B 0.035(3) 0.039(3) 0.032(3) -0.019(3) -0.002(3) 0.012(3)
C50B 0.047(4) 0.041(3) 0.035(3) -0.012(3) -0.005(3) 0.016(4)
C51B 0.042(4) 0.036(3) 0.034(3) -0.011(3) 0.005(3) 0.010(3)
C52B 0.041(4) 0.055(4) 0.048(3) -0.015(3) -0.005(4) 0.015(4)
C53B 0.038(5) 0.040(3) 0.035(3) 0.000(3) -0.004(3) -0.003(3)
C161 0.052(3) 0.046(3) 0.045(2) 0.011(2) 0.009(2) -0.007(2)
C162 0.079(4) 0.055(3) 0.058(3) 0.004(3) -0.033(3) -0.017(3)
C171 0.031(2) 0.042(2) 0.0243(17) -0.0051(15) 0.0062(16) -0.0004(18)
C172 0.029(2) 0.045(3) 0.040(2) 0.0166(18) 0.0091(18) 0.0082(19)
C261 0.058(3) 0.042(3) 0.045(2) -0.010(2) -0.005(2) -0.008(2)
C262 0.042(3) 0.027(2) 0.062(3) 0.0007(19) 0.016(2) 0.0027(19)
C271 0.032(2) 0.033(2) 0.048(2) 0.0135(18) 0.0109(19) -0.0025(18)
C272 0.042(2) 0.033(2) 0.039(2) -0.0027(17) 0.0012(19) -0.003(2)
C361 0.043(3) 0.041(3) 0.056(3) -0.009(2) 0.000(2) 0.013(2)
C362 0.034(2) 0.040(2) 0.044(2) -0.0094(19) 0.0010(19) 0.002(2)
C371 0.036(2) 0.035(2) 0.043(2) -0.0149(18) 0.0135(19) -0.0092(19)
C372 0.037(2) 0.034(2) 0.041(2) -0.0069(17) 0.0077(19) 0.0036(19)
C461 0.037(2) 0.045(2) 0.0298(17) -0.0028(18) 0.0021(17) -0.012(2)
C462 0.040(2) 0.055(3) 0.0319(19) -0.0057(18) 0.0118(19) -0.004(2)
C471 0.058(3) 0.038(2) 0.0297(18) -0.0082(17) 0.014(2) 0.009(2)
C472 0.039(3) 0.071(3) 0.0284(19) -0.002(2) 0.0028(19) 0.007(2)
N1 0.0126(13) 0.0213(14) 0.0176(12) -0.0024(10) 0.0039(11) -0.0004(11)
N2 0.0114(13) 0.0169(15) 0.0204(12) 0.0007(10) 0.0022(11) -0.0010(10)
N3 0.0209(15) 0.0197(14) 0.0158(12) 0.0028(10) 0.0066(11) 0.0027(12)
N4 0.0175(14) 0.0151(13) 0.0203(12) 0.0014(10) 0.0053(11) 0.0029(11)
O1 0.0348(16) 0.0332(16) 0.0434(14) -0.0034(12) 0.0089(13) -0.0059(13)
O2 0.0325(15) 0.0353(15) 0.0377(13) 0.0087(12) 0.0153(12) 0.0016(13)
Na1 0.0233(8) 0.0277(8) 0.0551(9) -0.0059(7) 0.0120(7) -0.0052(7)
Na2 0.0251(8) 0.0501(10) 0.0317(7) 0.0120(6) 0.0134(7) 0.0037(7)
U1 0.01152(5) 0.01369(6) 0.01303(5) -0.00007(5) 0.00272(4) 0.00015(6)
 
_geom_special_details
;
 All esds (except the esd in the dihedral angle between two l.s. planes)
 are estimated using the full covariance matrix.  The cell esds are taken
 into account individually in the estimation of esds in distances, angles
 and torsion angles; correlations between esds in cell parameters are only
 used when they are defined by crystal symmetry.  An approximate (isotropic)
 treatment of cell esds is used for estimating esds involving l.s. planes.
;
 
loop_
 _geom_bond_atom_site_label_1
 _geom_bond_atom_site_label_2
 _geom_bond_distance
 _geom_bond_site_symmetry_2
 _geom_bond_publ_flag
C1 O2 1.446(4) . ?
C1 C2 1.502(5) . ?
C1 H1A 0.9900 . ?
C1 H1B 0.9900 . ?
C2 H2A 0.9800 . ?
C2 H2B 0.9800 . ?
C2 H2C 0.9800 . ?
C3 O2 1.427(5) . ?
C3 C4 1.482(6) . ?
C3 H3A 0.9900 . ?
C3 H3B 0.9900 . ?
C4 H4A 0.9800 . ?
C4 H4B 0.9800 . ?
C4 H4C 0.9800 . ?
C5 O1 1.446(5) . ?
C5 C6 1.505(6) . ?
C5 H5A 0.9900 . ?
C5 H5B 0.9900 . ?
C6 H6A 0.9800 . ?
C6 H6B 0.9800 . ?
C6 H6C 0.9800 . ?
C7 O1 1.420(5) . ?
C7 C8 1.488(6) . ?
C7 H7A 0.9900 . ?
C7 H7B 0.9900 . ?
C8 H8A 0.9800 . ?
C8 H8B 0.9800 . ?
C8 H8C 0.9800 . ?
C10 N1 1.378(4) . ?
C10 C15 1.420(5) . ?
C10 C11 1.443(4) . ?
C10 Na1 2.757(3) . ?
C11 C12 1.388(5) . ?
C11 C16 1.523(5) . ?
C11 Na1 3.071(3) . ?
C12 C13 1.377(5) . ?
C12 H12 0.9500 . ?
C13 C14 1.386(5) . ?
C13 H13 0.9500 . ?
C14 C15 1.394(5) . ?
C14 H14 0.9500 . ?
C15 C17 1.518(4) . ?
C16 C162 1.507(6) . ?
C16 C161 1.532(5) . ?
C16 H16 1.0000 . ?
C17 C172 1.520(5) . ?
C17 C171 1.532(5) . ?
C17 H17 1.0000 . ?
C20 N2 1.393(4) . ?
C20 C25 1.424(5) . ?
C20 C21 1.440(5) . ?
C20 Na2 2.794(3) . ?
C21 C22 1.390(5) . ?
C21 C26 1.490(5) . ?
C22 C23 1.379(5) . ?
C22 H22 0.9500 . ?
C23 C24 1.382(5) . ?
C23 H23 0.9500 . ?
C24 C25 1.397(5) . ?
C24 H24 0.9500 . ?
C25 C27 1.516(5) . ?
C26 C262 1.531(5) . ?
C26 C261 1.532(5) . ?
C26 H26 1.0000 . ?
C27 C272 1.535(5) . ?
C27 C271 1.538(4) . ?
C27 H27 1.0000 . ?
C30 N3 1.382(4) . ?
C30 C31 1.418(5) . ?
C30 C35 1.425(4) . ?
C30 Na2 2.887(3) . ?
C31 C32 1.393(4) . ?
C31 C36 1.529(4) . ?
C32 C33 1.384(5) . ?
C32 H32 0.9500 . ?
C33 C34 1.370(5) . ?
C33 H33 0.9500 . ?
C34 C35 1.394(5) . ?
C34 H34 0.9500 . ?
C35 C37 1.516(5) . ?
C36 C362 1.485(5) . ?
C36 C361 1.535(5) . ?
C36 H36 1.0000 . ?
C37 C371 1.524(5) . ?
C37 C372 1.541(5) . ?
C37 H37 1.0000 . ?
C40 N4 1.371(4) . ?
C40 C45 1.425(4) . ?
C40 C41 1.428(4) . ?
C40 Na1 2.803(3) . ?
C41 C42 1.388(5) . ?
C41 C46 1.520(5) . ?
C42 C43 1.370(5) . ?
C42 H42 0.9500 . ?
C43 C44 1.387(5) . ?
C43 H43 0.9500 . ?
C44 C45 1.385(5) . ?
C44 H44 0.9500 . ?
C45 C47 1.526(4) . ?
C46 C461 1.531(5) . ?
C46 C462 1.544(4) . ?
C46 H46 1.0000 . ?
C47 C472 1.510(6) . ?
C47 C471 1.527(4) . ?
C47 H47 1.0000 . ?
O3 C53 1.439(14) . ?
O3 C50 1.446(17) . ?
O3 U1 2.56(2) . ?
C50 C51 1.529(14) . ?
C50 H50A 0.9900 . ?
C50 H50B 0.9900 . ?
C51 C52 1.598(15) . ?
C51 H51A 0.9900 . ?
C51 H51B 0.9900 . ?
C52 C53 1.557(13) . ?
C52 H52A 0.9900 . ?
C52 H52B 0.9900 . ?
C53 H53A 0.9900 . ?
C53 H53B 0.9900 . ?
O3B C50B 1.432(12) . ?
O3B C53B 1.433(9) . ?
O3B U1 2.602(12) . ?
C50B C51B 1.500(11) . ?
C50B H50C 0.9900 . ?
C50B H50D 0.9900 . ?
C51B C52B 1.561(10) . ?
C51B H51C 0.9900 . ?
C51B H51D 0.9900 . ?
C52B C53B 1.550(10) . ?
C52B H52C 0.9900 . ?
C52B H52D 0.9900 . ?
C53B H53C 0.9900 . ?
C53B H53D 0.9900 . ?
C161 H16A 0.9800 . ?
C161 H16B 0.9800 . ?
C161 H16C 0.9800 . ?
C162 H16D 0.9800 . ?
C162 H16E 0.9800 . ?
C162 H16F 0.9800 . ?
C171 H17A 0.9800 . ?
C171 H17B 0.9800 . ?
C171 H17C 0.9800 . ?
C172 H17D 0.9800 . ?
C172 H17E 0.9800 . ?
C172 H17F 0.9800 . ?
C261 H26D 0.9800 . ?
C261 H26E 0.9800 . ?
C261 H26F 0.9800 . ?
C262 H26A 0.9800 . ?
C262 H26B 0.9800 . ?
C262 H26C 0.9800 . ?
C271 H27A 0.9800 . ?
C271 H27B 0.9800 . ?
C271 H27C 0.9800 . ?
C272 H27D 0.9800 . ?
C272 H27E 0.9800 . ?
C272 H27F 0.9800 . ?
C361 H36D 0.9800 . ?
C361 H36E 0.9800 . ?
C361 H36F 0.9800 . ?
C362 H36A 0.9800 . ?
C362 H36B 0.9800 . ?
C362 H36C 0.9800 . ?
C371 H37A 0.9800 . ?
C371 H37B 0.9800 . ?
C371 H37C 0.9800 . ?
C372 H37D 0.9800 . ?
C372 H37E 0.9800 . ?
C372 H37F 0.9800 . ?
C461 H46A 0.9800 . ?
C461 H46B 0.9800 . ?
C461 H46C 0.9800 . ?
C462 H46D 0.9800 . ?
C462 H46E 0.9800 . ?
C462 H46F 0.9800 . ?
C471 H47A 0.9800 . ?
C471 H47B 0.9800 . ?
C471 H47C 0.9800 . ?
C472 H47D 0.9800 . ?
C472 H47E 0.9800 . ?
C472 H47F 0.9800 . ?
N1 U1 2.084(2) . ?
N1 Na1 2.452(3) . ?
N2 U1 2.063(3) . ?
N2 Na2 2.438(3) . ?
N3 U1 2.059(2) . ?
N3 Na2 2.402(3) . ?
N4 U1 2.068(3) . ?
N4 Na1 2.394(3) . ?
O1 Na1 2.241(3) . ?
O2 Na2 2.278(2) . ?
Na1 U1 3.3501(14) . ?
Na2 U1 3.3198(12) . ?
 
loop_
 _geom_angle_atom_site_label_1
 _geom_angle_atom_site_label_2
 _geom_angle_atom_site_label_3
 _geom_angle
 _geom_angle_site_symmetry_1
 _geom_angle_site_symmetry_3
 _geom_angle_publ_flag
O2 C1 C2 113.2(3) . . ?
O2 C1 H1A 108.9 . . ?
C2 C1 H1A 108.9 . . ?
O2 C1 H1B 108.9 . . ?
C2 C1 H1B 108.9 . . ?
H1A C1 H1B 107.8 . . ?
C1 C2 H2A 109.5 . . ?
C1 C2 H2B 109.5 . . ?
H2A C2 H2B 109.5 . . ?
C1 C2 H2C 109.5 . . ?
H2A C2 H2C 109.5 . . ?
H2B C2 H2C 109.5 . . ?
O2 C3 C4 109.0(3) . . ?
O2 C3 H3A 109.9 . . ?
C4 C3 H3A 109.9 . . ?
O2 C3 H3B 109.9 . . ?
C4 C3 H3B 109.9 . . ?
H3A C3 H3B 108.3 . . ?
C3 C4 H4A 109.5 . . ?
C3 C4 H4B 109.5 . . ?
H4A C4 H4B 109.5 . . ?
C3 C4 H4C 109.5 . . ?
H4A C4 H4C 109.5 . . ?
H4B C4 H4C 109.5 . . ?
O1 C5 C6 112.3(3) . . ?
O1 C5 H5A 109.1 . . ?
C6 C5 H5A 109.1 . . ?
O1 C5 H5B 109.1 . . ?
C6 C5 H5B 109.1 . . ?
H5A C5 H5B 107.9 . . ?
C5 C6 H6A 109.5 . . ?
C5 C6 H6B 109.5 . . ?
H6A C6 H6B 109.5 . . ?
C5 C6 H6C 109.5 . . ?
H6A C6 H6C 109.5 . . ?
H6B C6 H6C 109.5 . . ?
O1 C7 C8 109.8(4) . . ?
O1 C7 H7A 109.7 . . ?
C8 C7 H7A 109.7 . . ?
O1 C7 H7B 109.7 . . ?
C8 C7 H7B 109.7 . . ?
H7A C7 H7B 108.2 . . ?
C7 C8 H8A 109.5 . . ?
C7 C8 H8B 109.5 . . ?
H8A C8 H8B 109.5 . . ?
C7 C8 H8C 109.5 . . ?
H8A C8 H8C 109.5 . . ?
H8B C8 H8C 109.5 . . ?
N1 C10 C15 121.4(3) . . ?
N1 C10 C11 121.4(3) . . ?
C15 C10 C11 117.2(3) . . ?
N1 C10 Na1 62.68(16) . . ?
C15 C10 Na1 118.9(2) . . ?
C11 C10 Na1 88.2(2) . . ?
C12 C11 C10 119.6(3) . . ?
C12 C11 C16 119.6(3) . . ?
C10 C11 C16 120.7(3) . . ?
C12 C11 Na1 132.5(3) . . ?
C10 C11 Na1 63.81(17) . . ?
C16 C11 Na1 78.93(19) . . ?
C13 C12 C11 122.2(3) . . ?
C13 C12 H12 118.9 . . ?
C11 C12 H12 118.9 . . ?
C12 C13 C14 119.0(3) . . ?
C12 C13 H13 120.5 . . ?
C14 C13 H13 120.5 . . ?
C13 C14 C15 121.5(3) . . ?
C13 C14 H14 119.3 . . ?
C15 C14 H14 119.3 . . ?
C14 C15 C10 120.4(3) . . ?
C14 C15 C17 119.8(3) . . ?
C10 C15 C17 119.8(3) . . ?
C162 C16 C11 110.9(3) . . ?
C162 C16 C161 109.4(3) . . ?
C11 C16 C161 112.6(3) . . ?
C162 C16 H16 107.9 . . ?
C11 C16 H16 107.9 . . ?
C161 C16 H16 107.9 . . ?
C15 C17 C172 114.8(3) . . ?
C15 C17 C171 110.3(3) . . ?
C172 C17 C171 109.5(3) . . ?
C15 C17 H17 107.3 . . ?
C172 C17 H17 107.3 . . ?
C171 C17 H17 107.3 . . ?
N2 C20 C25 121.2(3) . . ?
N2 C20 C21 120.6(3) . . ?
C25 C20 C21 118.2(3) . . ?
N2 C20 Na2 60.77(15) . . ?
C25 C20 Na2 102.81(19) . . ?
C21 C20 Na2 105.56(19) . . ?
C22 C21 C20 119.3(3) . . ?
C22 C21 C26 120.8(3) . . ?
C20 C21 C26 119.9(3) . . ?
C23 C22 C21 122.1(3) . . ?
C23 C22 H22 119.0 . . ?
C21 C22 H22 119.0 . . ?
C22 C23 C24 119.2(3) . . ?
C22 C23 H23 120.4 . . ?
C24 C23 H23 120.4 . . ?
C23 C24 C25 121.9(3) . . ?
C23 C24 H24 119.1 . . ?
C25 C24 H24 119.1 . . ?
C24 C25 C20 119.4(3) . . ?
C24 C25 C27 118.8(3) . . ?
C20 C25 C27 121.7(3) . . ?
C21 C26 C262 114.7(3) . . ?
C21 C26 C261 111.2(3) . . ?
C262 C26 C261 109.0(3) . . ?
C21 C26 H26 107.2 . . ?
C262 C26 H26 107.2 . . ?
C261 C26 H26 107.2 . . ?
C25 C27 C272 112.2(3) . . ?
C25 C27 C271 111.6(3) . . ?
C272 C27 C271 108.2(3) . . ?
C25 C27 H27 108.2 . . ?
C272 C27 H27 108.2 . . ?
C271 C27 H27 108.2 . . ?
N3 C30 C31 120.4(3) . . ?
N3 C30 C35 121.0(3) . . ?
C31 C30 C35 118.6(3) . . ?
N3 C30 Na2 55.87(15) . . ?
C31 C30 Na2 116.4(2) . . ?
C35 C30 Na2 96.9(2) . . ?
C32 C31 C30 119.7(3) . . ?
C32 C31 C36 121.0(3) . . ?
C30 C31 C36 119.3(3) . . ?
C33 C32 C31 121.2(3) . . ?
C33 C32 H32 119.4 . . ?
C31 C32 H32 119.4 . . ?
C34 C33 C32 119.3(3) . . ?
C34 C33 H33 120.4 . . ?
C32 C33 H33 120.4 . . ?
C33 C34 C35 122.3(3) . . ?
C33 C34 H34 118.8 . . ?
C35 C34 H34 118.8 . . ?
C34 C35 C30 118.8(3) . . ?
C34 C35 C37 119.9(3) . . ?
C30 C35 C37 121.3(3) . . ?
C362 C36 C31 111.2(3) . . ?
C362 C36 C361 110.8(3) . . ?
C31 C36 C361 113.4(3) . . ?
C362 C36 H36 107.0 . . ?
C31 C36 H36 107.0 . . ?
C361 C36 H36 107.0 . . ?
C35 C37 C371 112.9(3) . . ?
C35 C37 C372 111.7(3) . . ?
C371 C37 C372 109.3(3) . . ?
C35 C37 H37 107.6 . . ?
C371 C37 H37 107.6 . . ?
C372 C37 H37 107.6 . . ?
N4 C40 C45 122.3(3) . . ?
N4 C40 C41 119.8(3) . . ?
C45 C40 C41 117.9(3) . . ?
N4 C40 Na1 58.60(16) . . ?
C45 C40 Na1 107.8(2) . . ?
C41 C40 Na1 103.34(19) . . ?
C42 C41 C40 119.6(3) . . ?
C42 C41 C46 120.6(3) . . ?
C40 C41 C46 119.8(3) . . ?
C43 C42 C41 122.1(3) . . ?
C43 C42 H42 119.0 . . ?
C41 C42 H42 119.0 . . ?
C42 C43 C44 118.9(3) . . ?
C42 C43 H43 120.6 . . ?
C44 C43 H43 120.6 . . ?
C45 C44 C43 121.9(3) . . ?
C45 C44 H44 119.0 . . ?
C43 C44 H44 119.0 . . ?
C44 C45 C40 119.6(3) . . ?
C44 C45 C47 120.7(3) . . ?
C40 C45 C47 119.7(3) . . ?
C41 C46 C461 111.1(3) . . ?
C41 C46 C462 112.9(3) . . ?
C461 C46 C462 109.8(3) . . ?
C41 C46 H46 107.6 . . ?
C461 C46 H46 107.6 . . ?
C462 C46 H46 107.6 . . ?
C472 C47 C45 111.0(3) . . ?
C472 C47 C471 110.1(3) . . ?
C45 C47 C471 113.2(3) . . ?
C472 C47 H47 107.4 . . ?
C45 C47 H47 107.4 . . ?
C471 C47 H47 107.4 . . ?
C53 O3 C50 107.7(17) . . ?
C53 O3 U1 126.0(14) . . ?
C50 O3 U1 122.3(19) . . ?
O3 C50 C51 100.1(19) . . ?
O3 C50 H50A 111.7 . . ?
C51 C50 H50A 111.7 . . ?
O3 C50 H50B 111.7 . . ?
C51 C50 H50B 111.7 . . ?
H50A C50 H50B 109.5 . . ?
C50 C51 C52 95.5(11) . . ?
C50 C51 H51A 112.6 . . ?
C52 C51 H51A 112.6 . . ?
C50 C51 H51B 112.6 . . ?
C52 C51 H51B 112.6 . . ?
H51A C51 H51B 110.1 . . ?
C53 C52 C51 101.3(11) . . ?
C53 C52 H52A 111.5 . . ?
C51 C52 H52A 111.5 . . ?
C53 C52 H52B 111.5 . . ?
C51 C52 H52B 111.5 . . ?
H52A C52 H52B 109.3 . . ?
O3 C53 C52 104.6(11) . . ?
O3 C53 H53A 110.8 . . ?
C52 C53 H53A 110.8 . . ?
O3 C53 H53B 110.8 . . ?
C52 C53 H53B 110.8 . . ?
H53A C53 H53B 108.9 . . ?
C50B O3B C53B 111.9(9) . . ?
C50B O3B U1 123.6(9) . . ?
C53B O3B U1 124.3(9) . . ?
O3B C50B C51B 108.1(10) . . ?
O3B C50B H50C 110.1 . . ?
C51B C50B H50C 110.1 . . ?
O3B C50B H50D 110.1 . . ?
C51B C50B H50D 110.1 . . ?
H50C C50B H50D 108.4 . . ?
C50B C51B C52B 100.1(7) . . ?
C50B C51B H51C 111.8 . . ?
C52B C51B H51C 111.8 . . ?
C50B C51B H51D 111.8 . . ?
C52B C51B H51D 111.8 . . ?
H51C C51B H51D 109.5 . . ?
C53B C52B C51B 105.6(7) . . ?
C53B C52B H52C 110.6 . . ?
C51B C52B H52C 110.6 . . ?
C53B C52B H52D 110.6 . . ?
C51B C52B H52D 110.6 . . ?
H52C C52B H52D 108.8 . . ?
O3B C53B C52B 103.9(8) . . ?
O3B C53B H53C 111.0 . . ?
C52B C53B H53C 111.0 . . ?
O3B C53B H53D 111.0 . . ?
C52B C53B H53D 111.0 . . ?
H53C C53B H53D 109.0 . . ?
C16 C161 H16A 109.5 . . ?
C16 C161 H16B 109.5 . . ?
H16A C161 H16B 109.5 . . ?
C16 C161 H16C 109.5 . . ?
H16A C161 H16C 109.5 . . ?
H16B C161 H16C 109.5 . . ?
C16 C162 H16D 109.5 . . ?
C16 C162 H16E 109.5 . . ?
H16D C162 H16E 109.5 . . ?
C16 C162 H16F 109.5 . . ?
H16D C162 H16F 109.5 . . ?
H16E C162 H16F 109.5 . . ?
C17 C171 H17A 109.5 . . ?
C17 C171 H17B 109.5 . . ?
H17A C171 H17B 109.5 . . ?
C17 C171 H17C 109.5 . . ?
H17A C171 H17C 109.5 . . ?
H17B C171 H17C 109.5 . . ?
C17 C172 H17D 109.5 . . ?
C17 C172 H17E 109.5 . . ?
H17D C172 H17E 109.5 . . ?
C17 C172 H17F 109.5 . . ?
H17D C172 H17F 109.5 . . ?
H17E C172 H17F 109.5 . . ?
C26 C261 H26D 109.5 . . ?
C26 C261 H26E 109.5 . . ?
H26D C261 H26E 109.5 . . ?
C26 C261 H26F 109.5 . . ?
H26D C261 H26F 109.5 . . ?
H26E C261 H26F 109.5 . . ?
C26 C262 H26A 109.5 . . ?
C26 C262 H26B 109.5 . . ?
H26A C262 H26B 109.5 . . ?
C26 C262 H26C 109.5 . . ?
H26A C262 H26C 109.5 . . ?
H26B C262 H26C 109.5 . . ?
C27 C271 H27A 109.5 . . ?
C27 C271 H27B 109.5 . . ?
H27A C271 H27B 109.5 . . ?
C27 C271 H27C 109.5 . . ?
H27A C271 H27C 109.5 . . ?
H27B C271 H27C 109.5 . . ?
C27 C272 H27D 109.5 . . ?
C27 C272 H27E 109.5 . . ?
H27D C272 H27E 109.5 . . ?
C27 C272 H27F 109.5 . . ?
H27D C272 H27F 109.5 . . ?
H27E C272 H27F 109.5 . . ?
C36 C361 H36D 109.5 . . ?
C36 C361 H36E 109.5 . . ?
H36D C361 H36E 109.5 . . ?
C36 C361 H36F 109.5 . . ?
H36D C361 H36F 109.5 . . ?
H36E C361 H36F 109.5 . . ?
C36 C362 H36A 109.5 . . ?
C36 C362 H36B 109.5 . . ?
H36A C362 H36B 109.5 . . ?
C36 C362 H36C 109.5 . . ?
H36A C362 H36C 109.5 . . ?
H36B C362 H36C 109.5 . . ?
C37 C371 H37A 109.5 . . ?
C37 C371 H37B 109.5 . . ?
H37A C371 H37B 109.5 . . ?
C37 C371 H37C 109.5 . . ?
H37A C371 H37C 109.5 . . ?
H37B C371 H37C 109.5 . . ?
C37 C372 H37D 109.5 . . ?
C37 C372 H37E 109.5 . . ?
H37D C372 H37E 109.5 . . ?
C37 C372 H37F 109.5 . . ?
H37D C372 H37F 109.5 . . ?
H37E C372 H37F 109.5 . . ?
C46 C461 H46A 109.5 . . ?
C46 C461 H46B 109.5 . . ?
H46A C461 H46B 109.5 . . ?
C46 C461 H46C 109.5 . . ?
H46A C461 H46C 109.5 . . ?
H46B C461 H46C 109.5 . . ?
C46 C462 H46D 109.5 . . ?
C46 C462 H46E 109.5 . . ?
H46D C462 H46E 109.5 . . ?
C46 C462 H46F 109.5 . . ?
H46D C462 H46F 109.5 . . ?
H46E C462 H46F 109.5 . . ?
C47 C471 H47A 109.5 . . ?
C47 C471 H47B 109.5 . . ?
H47A C471 H47B 109.5 . . ?
C47 C471 H47C 109.5 . . ?
H47A C471 H47C 109.5 . . ?
H47B C471 H47C 109.5 . . ?
C47 C472 H47D 109.5 . . ?
C47 C472 H47E 109.5 . . ?
H47D C472 H47E 109.5 . . ?
C47 C472 H47F 109.5 . . ?
H47D C472 H47F 109.5 . . ?
H47E C472 H47F 109.5 . . ?
C10 N1 U1 174.8(2) . . ?
C10 N1 Na1 87.38(18) . . ?
U1 N1 Na1 94.86(10) . . ?
C20 N2 U1 173.6(2) . . ?
C20 N2 Na2 89.34(16) . . ?
U1 N2 Na2 94.68(10) . . ?
C30 N3 U1 167.7(2) . . ?
C30 N3 Na2 95.69(17) . . ?
U1 N3 Na2 95.88(11) . . ?
C40 N4 U1 162.4(2) . . ?
C40 N4 Na1 92.16(19) . . ?
U1 N4 Na1 97.03(11) . . ?
C7 O1 C5 113.8(3) . . ?
C7 O1 Na1 127.7(3) . . ?
C5 O1 Na1 118.3(2) . . ?
C3 O2 C1 113.2(3) . . ?
C3 O2 Na2 124.5(2) . . ?
C1 O2 Na2 119.3(2) . . ?
O1 Na1 N4 148.30(12) . . ?
O1 Na1 N1 133.95(12) . . ?
N4 Na1 N1 76.04(10) . . ?
O1 Na1 C10 104.32(11) . . ?
N4 Na1 C10 105.97(10) . . ?
N1 Na1 C10 29.95(9) . . ?
O1 Na1 C40 122.02(11) . . ?
N4 Na1 C40 29.24(9) . . ?
N1 Na1 C40 103.95(10) . . ?
C10 Na1 C40 133.64(11) . . ?
O1 Na1 C11 89.59(10) . . ?
N4 Na1 C11 121.87(11) . . ?
N1 Na1 C11 51.41(8) . . ?
C10 Na1 C11 28.01(8) . . ?
C40 Na1 C11 140.26(11) . . ?
O1 Na1 U1 167.52(10) . . ?
N4 Na1 U1 37.79(7) . . ?
N1 Na1 U1 38.32(6) . . ?
C10 Na1 U1 68.20(7) . . ?
C40 Na1 U1 66.39(7) . . ?
C11 Na1 U1 87.34(7) . . ?
O2 Na2 N3 126.44(11) . . ?
O2 Na2 N2 149.73(12) . . ?
N3 Na2 N2 76.00(9) . . ?
O2 Na2 C20 123.17(11) . . ?
N3 Na2 C20 105.89(9) . . ?
N2 Na2 C20 29.90(8) . . ?
O2 Na2 C30 98.48(10) . . ?
N3 Na2 C30 28.44(8) . . ?
N2 Na2 C30 103.95(9) . . ?
C20 Na2 C30 133.59(9) . . ?
O2 Na2 U1 160.73(9) . . ?
N3 Na2 U1 38.09(6) . . ?
N2 Na2 U1 38.27(6) . . ?
C20 Na2 U1 68.09(6) . . ?
C30 Na2 U1 66.47(6) . . ?
N3 U1 N2 92.61(10) . . ?
N3 U1 N4 112.40(10) . . ?
N2 U1 N4 96.23(10) . . ?
N3 U1 N1 98.03(10) . . ?
N2 U1 N1 163.01(10) . . ?
N4 U1 N1 91.93(10) . . ?
N3 U1 O3 118.4(11) . . ?
N2 U1 O3 81.4(15) . . ?
N4 U1 O3 129.2(10) . . ?
N1 U1 O3 81.9(15) . . ?
N3 U1 O3B 120.2(7) . . ?
N2 U1 O3B 81.4(9) . . ?
N4 U1 O3B 127.4(7) . . ?
N1 U1 O3B 81.8(9) . . ?
N3 U1 Na2 46.03(8) . . ?
N2 U1 Na2 47.06(7) . . ?
N4 U1 Na2 105.59(7) . . ?
N1 U1 Na2 143.71(7) . . ?
O3 U1 Na2 108.7(17) . . ?
O3B U1 Na2 109.8(10) . . ?
N3 U1 Na1 110.00(8) . . ?
N2 U1 Na1 140.05(7) . . ?
N4 U1 Na1 45.18(8) . . ?
N1 U1 Na1 46.83(8) . . ?
O3 U1 Na1 112.9(17) . . ?
O3B U1 Na1 111.8(10) . . ?
Na2 U1 Na1 138.39(4) . . ?
 
loop_
 _geom_torsion_atom_site_label_1
 _geom_torsion_atom_site_label_2
 _geom_torsion_atom_site_label_3
 _geom_torsion_atom_site_label_4
 _geom_torsion
 _geom_torsion_site_symmetry_1
 _geom_torsion_site_symmetry_2
 _geom_torsion_site_symmetry_3
 _geom_torsion_site_symmetry_4
 _geom_torsion_publ_flag
N1 C10 C11 C12 -178.0(3) . . . . ?
C15 C10 C11 C12 4.0(5) . . . . ?
Na1 C10 C11 C12 125.9(3) . . . . ?
N1 C10 C11 C16 -1.1(5) . . . . ?
C15 C10 C11 C16 -179.1(3) . . . . ?
Na1 C10 C11 C16 -57.3(3) . . . . ?
N1 C10 C11 Na1 56.1(3) . . . . ?
C15 C10 C11 Na1 -121.8(3) . . . . ?
C10 C11 C12 C13 -2.6(6) . . . . ?
C16 C11 C12 C13 -179.6(4) . . . . ?
Na1 C11 C12 C13 77.7(5) . . . . ?
C11 C12 C13 C14 0.2(6) . . . . ?
C12 C13 C14 C15 0.7(6) . . . . ?
C13 C14 C15 C10 0.9(5) . . . . ?
C13 C14 C15 C17 -177.0(3) . . . . ?
N1 C10 C15 C14 178.8(3) . . . . ?
C11 C10 C15 C14 -3.2(5) . . . . ?
Na1 C10 C15 C14 -107.3(3) . . . . ?
N1 C10 C15 C17 -3.2(5) . . . . ?
C11 C10 C15 C17 174.8(3) . . . . ?
Na1 C10 C15 C17 70.7(3) . . . . ?
C12 C11 C16 C162 75.8(5) . . . . ?
C10 C11 C16 C162 -101.1(4) . . . . ?
Na1 C11 C16 C162 -151.4(3) . . . . ?
C12 C11 C16 C161 -47.1(5) . . . . ?
C10 C11 C16 C161 136.0(3) . . . . ?
Na1 C11 C16 C161 85.7(3) . . . . ?
C14 C15 C17 C172 -24.7(5) . . . . ?
C10 C15 C17 C172 157.3(3) . . . . ?
C14 C15 C17 C171 99.6(4) . . . . ?
C10 C15 C17 C171 -78.4(4) . . . . ?
N2 C20 C21 C22 -179.1(3) . . . . ?
C25 C20 C21 C22 0.0(4) . . . . ?
Na2 C20 C21 C22 -114.2(3) . . . . ?
N2 C20 C21 C26 -1.3(4) . . . . ?
C25 C20 C21 C26 177.8(3) . . . . ?
Na2 C20 C21 C26 63.6(3) . . . . ?
C20 C21 C22 C23 -0.5(5) . . . . ?
C26 C21 C22 C23 -178.2(3) . . . . ?
C21 C22 C23 C24 0.5(5) . . . . ?
C22 C23 C24 C25 -0.1(5) . . . . ?
C23 C24 C25 C20 -0.4(4) . . . . ?
C23 C24 C25 C27 177.4(3) . . . . ?
N2 C20 C25 C24 179.5(3) . . . . ?
C21 C20 C25 C24 0.4(4) . . . . ?
Na2 C20 C25 C24 116.1(3) . . . . ?
N2 C20 C25 C27 1.7(4) . . . . ?
C21 C20 C25 C27 -177.4(3) . . . . ?
Na2 C20 C25 C27 -61.7(3) . . . . ?
C22 C21 C26 C262 -41.4(4) . . . . ?
C20 C21 C26 C262 140.8(3) . . . . ?
C22 C21 C26 C261 82.8(4) . . . . ?
C20 C21 C26 C261 -95.0(4) . . . . ?
C24 C25 C27 C272 55.2(4) . . . . ?
C20 C25 C27 C272 -127.1(3) . . . . ?
C24 C25 C27 C271 -66.5(4) . . . . ?
C20 C25 C27 C271 111.2(3) . . . . ?
N3 C30 C31 C32 178.7(3) . . . . ?
C35 C30 C31 C32 -2.0(5) . . . . ?
Na2 C30 C31 C32 -117.1(3) . . . . ?
N3 C30 C31 C36 -2.6(5) . . . . ?
C35 C30 C31 C36 176.8(3) . . . . ?
Na2 C30 C31 C36 61.6(3) . . . . ?
C30 C31 C32 C33 1.4(5) . . . . ?
C36 C31 C32 C33 -177.3(3) . . . . ?
C31 C32 C33 C34 -0.1(6) . . . . ?
C32 C33 C34 C35 -0.5(6) . . . . ?
C33 C34 C35 C30 -0.1(6) . . . . ?
C33 C34 C35 C37 -179.6(4) . . . . ?
N3 C30 C35 C34 -179.3(3) . . . . ?
C31 C30 C35 C34 1.4(5) . . . . ?
Na2 C30 C35 C34 126.6(3) . . . . ?
N3 C30 C35 C37 0.2(5) . . . . ?
C31 C30 C35 C37 -179.2(3) . . . . ?
Na2 C30 C35 C37 -53.9(3) . . . . ?
C32 C31 C36 C362 95.8(4) . . . . ?
C30 C31 C36 C362 -83.0(4) . . . . ?
C32 C31 C36 C361 -29.9(5) . . . . ?
C30 C31 C36 C361 151.3(3) . . . . ?
C34 C35 C37 C371 52.5(4) . . . . ?
C30 C35 C37 C371 -126.9(3) . . . . ?
C34 C35 C37 C372 -71.1(5) . . . . ?
C30 C35 C37 C372 109.4(3) . . . . ?
N4 C40 C41 C42 179.9(3) . . . . ?
C45 C40 C41 C42 0.0(5) . . . . ?
Na1 C40 C41 C42 -118.8(3) . . . . ?
N4 C40 C41 C46 1.5(5) . . . . ?
C45 C40 C41 C46 -178.5(3) . . . . ?
Na1 C40 C41 C46 62.7(3) . . . . ?
C40 C41 C42 C43 0.5(5) . . . . ?
C46 C41 C42 C43 178.9(3) . . . . ?
C41 C42 C43 C44 0.0(6) . . . . ?
C42 C43 C44 C45 -1.0(6) . . . . ?
C43 C44 C45 C40 1.4(5) . . . . ?
C43 C44 C45 C47 178.8(3) . . . . ?
N4 C40 C45 C44 179.2(3) . . . . ?
C41 C40 C45 C44 -0.9(5) . . . . ?
Na1 C40 C45 C44 115.5(3) . . . . ?
N4 C40 C45 C47 1.7(5) . . . . ?
C41 C40 C45 C47 -178.3(3) . . . . ?
Na1 C40 C45 C47 -61.9(3) . . . . ?
C42 C41 C46 C461 -83.7(4) . . . . ?
C40 C41 C46 C461 94.7(4) . . . . ?
C42 C41 C46 C462 40.1(5) . . . . ?
C40 C41 C46 C462 -141.5(3) . . . . ?
C44 C45 C47 C472 -92.6(4) . . . . ?
C40 C45 C47 C472 84.8(4) . . . . ?
C44 C45 C47 C471 31.8(5) . . . . ?
C40 C45 C47 C471 -150.8(3) . . . . ?
C53 O3 C50 C51 -47(5) . . . . ?
U1 O3 C50 C51 154(3) . . . . ?
O3 C50 C51 C52 54(3) . . . . ?
C50 C51 C52 C53 -42.7(18) . . . . ?
C50 O3 C53 C52 17(5) . . . . ?
U1 O3 C53 C52 175(4) . . . . ?
C51 C52 C53 O3 17(4) . . . . ?
C53B O3B C50B C51B 19(4) . . . . ?
U1 O3B C50B C51B -166.0(19) . . . . ?
O3B C50B C51B C52B -30(2) . . . . ?
C50B C51B C52B C53B 30.9(13) . . . . ?
C50B O3B C53B C52B 2(4) . . . . ?
U1 O3B C53B C52B -173(2) . . . . ?
C51B C52B C53B O3B -21(2) . . . . ?
C15 C10 N1 Na1 108.8(3) . . . . ?
C11 C10 N1 Na1 -69.1(3) . . . . ?
C25 C20 N2 Na2 -87.6(2) . . . . ?
C21 C20 N2 Na2 91.5(2) . . . . ?
C31 C30 N3 U1 -56.6(12) . . . . ?
C35 C30 N3 U1 124.1(10) . . . . ?
Na2 C30 N3 U1 -159.6(11) . . . . ?
C31 C30 N3 Na2 103.1(3) . . . . ?
C35 C30 N3 Na2 -76.3(3) . . . . ?
C45 C40 N4 U1 146.2(5) . . . . ?
C41 C40 N4 U1 -33.8(8) . . . . ?
Na1 C40 N4 U1 -121.6(7) . . . . ?
C45 C40 N4 Na1 -92.2(3) . . . . ?
C41 C40 N4 Na1 87.8(3) . . . . ?
C8 C7 O1 C5 -174.5(3) . . . . ?
C8 C7 O1 Na1 0.3(5) . . . . ?
C6 C5 O1 C7 86.7(4) . . . . ?
C6 C5 O1 Na1 -88.6(4) . . . . ?
C4 C3 O2 C1 173.2(3) . . . . ?
C4 C3 O2 Na2 -26.5(5) . . . . ?
C2 C1 O2 C3 -77.4(4) . . . . ?
C2 C1 O2 Na2 121.2(3) . . . . ?
 
_refine_diff_density_max    0.710
_refine_diff_density_min   -0.750
_refine_diff_density_rms    0.109

_shelx_res_file
;

    nha61_2016.res created by SHELXL-2014/7


TITL xl in P2(1)/n
CELL  0.71073  14.7552  20.6750  20.3540   90.000  105.139   90.000
ZERR    4.000   0.0002   0.0005   0.0003    0.000    0.001    0.000
LATT  1
SYMM 1/2-X, 1/2+Y, 1/2-Z
SFAC C H N O NA U
UNIT 240 384 16 12 8 4
LIST 6 ! automatically inserted. Change 6 to 4 for CHECKCIF!!
HTAB

TEMP -123.00
SIZE 0.60 0.70 0.70
L.S.  15
ACTA
BOND $H
CONF
PLAN 20
SIMU 0.01 O3 > C53B
OMIT 1 1 0
OMIT -1 1 1
OMIT -8 2 13
OMIT 5 7 9
WGHT    0.019500
FVAR       0.17777   0.38728
C1    1    0.243840    0.571742    0.840841    11.00000    0.04072    0.03358 =
         0.03910    0.00759    0.01631    0.00514
AFIX  23
H1A   2    0.305216    0.562029    0.831875    11.00000   -1.20000
H1B   2    0.203773    0.532869    0.828731    11.00000   -1.20000
AFIX   0
C2    1    0.258746    0.585411    0.915366    11.00000    0.04170    0.05130 =
         0.03918    0.00850    0.01278    0.00153
AFIX 137
H2A   2    0.294428    0.625643    0.927090    11.00000   -1.50000
H2B   2    0.293766    0.549664    0.941975    11.00000   -1.50000
H2C   2    0.197771    0.589846    0.925670    11.00000   -1.50000
AFIX   0
C3    1    0.101745    0.629579    0.790414    11.00000    0.03537    0.05093 =
         0.04517    0.00969    0.02039    0.00302
AFIX  23
H3A   2    0.088949    0.630443    0.835791    11.00000   -1.20000
H3B   2    0.069473    0.591547    0.765243    11.00000   -1.20000
AFIX   0
C4    1    0.066190    0.689657    0.752693    11.00000    0.04701    0.06472 =
         0.05700    0.01842    0.01928    0.01693
AFIX 137
H4A   2    0.095765    0.727228    0.779112    11.00000   -1.50000
H4B   2   -0.002041    0.692176    0.745431    11.00000   -1.50000
H4C   2    0.081339    0.689288    0.708596    11.00000   -1.50000
AFIX   0
C5    1    0.837233    0.784540    0.688422    11.00000    0.03038    0.03945 =
         0.05290    0.00036    0.00552    0.00947
AFIX  23
H5A   2    0.894529    0.794537    0.673674    11.00000   -1.20000
H5B   2    0.825523    0.737463    0.682744    11.00000   -1.20000
AFIX   0
C6    1    0.853552    0.801832    0.762430    11.00000    0.04262    0.04280 =
         0.05203    0.00491    0.00461   -0.00742
AFIX 137
H6A   2    0.860044    0.848841    0.767836    11.00000   -1.50000
H6B   2    0.911064    0.780792    0.788867    11.00000   -1.50000
H6C   2    0.800171    0.787122    0.778774    11.00000   -1.50000
AFIX   0
C7    1    0.782553    0.880770    0.624289    11.00000    0.04172    0.03912 =
         0.06334   -0.00143    0.01078   -0.00966
AFIX  23
H7A   2    0.825727    0.875490    0.594723    11.00000   -1.20000
H7B   2    0.815091    0.906559    0.664524    11.00000   -1.20000
AFIX   0
C8    1    0.696146    0.915138    0.586322    11.00000    0.04427    0.04140 =
         0.04363    0.00604    0.00774    0.00687
AFIX 137
H8A   2    0.662608    0.888560    0.547745    11.00000   -1.50000
H8B   2    0.713382    0.956562    0.569531    11.00000   -1.50000
H8C   2    0.655526    0.922931    0.616678    11.00000   -1.50000
AFIX   0
C10   1    0.645079    0.644454    0.616818    11.00000    0.01744    0.01723 =
         0.02218   -0.00722    0.00739   -0.00524
C11   1    0.682333    0.658358    0.559478    11.00000    0.02243    0.02567 =
         0.02654   -0.00125    0.01162    0.00015
C12   1    0.771125    0.636208    0.559377    11.00000    0.02585    0.04607 =
         0.03483    0.00550    0.01788    0.00682
AFIX  43
H12   2    0.793878    0.644054    0.520541    11.00000   -1.20000
AFIX   0
C13   1    0.827284    0.603244    0.613715    11.00000    0.02240    0.04575 =
         0.05169    0.00766    0.01922    0.01114
AFIX  43
H13   2    0.887893    0.588740    0.612439    11.00000   -1.20000
AFIX   0
C14   1    0.794040    0.591546    0.670301    11.00000    0.01918    0.03158 =
         0.03510    0.00692    0.00807    0.00391
AFIX  43
H14   2    0.832817    0.569213    0.708098    11.00000   -1.20000
AFIX   0
C15   1    0.704948    0.611821    0.673002    11.00000    0.01624    0.01863 =
         0.02500   -0.00349    0.00400   -0.00100
C16   1    0.623384    0.694107    0.497530    11.00000    0.02424    0.03293 =
         0.02455    0.00164    0.01016    0.00120
AFIX  13
H16   2    0.570135    0.715504    0.510962    11.00000   -1.20000
AFIX   0
C17   1    0.672993    0.600945    0.737236    11.00000    0.01980    0.02661 =
         0.02439    0.00506    0.00379    0.00177
AFIX  13
H17   2    0.604430    0.590627    0.722840    11.00000   -1.20000
AFIX   0
C20   1    0.184930    0.714650    0.595551    11.00000    0.01396    0.02373 =
         0.01365    0.00476    0.00364    0.00082
C21   1    0.153913    0.779175    0.605105    11.00000    0.01947    0.02332 =
         0.02227    0.00374    0.00717    0.00348
C22   1    0.058288    0.791959    0.590857    11.00000    0.02077    0.02934 =
         0.02732    0.00320    0.00631    0.00711
AFIX  43
H22   2    0.038180    0.834531    0.597559    11.00000   -1.20000
AFIX   0
C23   1   -0.008337    0.744767    0.567288    11.00000    0.01503    0.04353 =
         0.03008    0.00600    0.00806    0.00666
AFIX  43
H23   2   -0.073305    0.754841    0.557608    11.00000   -1.20000
AFIX   0
C24   1    0.020560    0.682642    0.557923    11.00000    0.01210    0.03605 =
         0.02568    0.00576    0.00267   -0.00442
AFIX  43
H24   2   -0.025441    0.650197    0.541720    11.00000   -1.20000
AFIX   0
C25   1    0.115509    0.666210    0.571612    11.00000    0.01612    0.02978 =
         0.01733    0.00522    0.00394   -0.00262
C26   1    0.224237    0.830734    0.632396    11.00000    0.02201    0.02697 =
         0.03889   -0.00208    0.00882    0.00431
AFIX  13
H26   2    0.284833    0.816872    0.623435    11.00000   -1.20000
AFIX   0
C27   1    0.141797    0.596411    0.562955    11.00000    0.01943    0.02582 =
         0.02796    0.00153    0.00543   -0.00784
AFIX  13
H27   2    0.211426    0.594065    0.570304    11.00000   -1.20000
AFIX   0
C30   1    0.461377    0.617612    0.784575    11.00000    0.01271    0.02264 =
         0.01799    0.00405    0.00314    0.00110
C31   1    0.468863    0.549213    0.785959    11.00000    0.01910    0.02084 =
         0.02127    0.00230    0.00417    0.00080
C32   1    0.496104    0.517079    0.848188    11.00000    0.02676    0.02617 =
         0.03578    0.00991    0.00937    0.00427
AFIX  43
H32   2    0.502355    0.471335    0.848807    11.00000   -1.20000
AFIX   0
C33   1    0.514225    0.550562    0.909114    11.00000    0.04456    0.04098 =
         0.02173    0.01246    0.00793    0.00504
AFIX  43
H33   2    0.532634    0.528045    0.951192    11.00000   -1.20000
AFIX   0
C34   1    0.505319    0.616554    0.908074    11.00000    0.03618    0.03688 =
         0.01742    0.00146    0.00466    0.00083
AFIX  43
H34   2    0.517349    0.639213    0.950073    11.00000   -1.20000
AFIX   0
C35   1    0.479232    0.651595    0.847561    11.00000    0.02509    0.02553 =
         0.02215    0.00189    0.00596   -0.00235
C36   1    0.444867    0.511719    0.718904    11.00000    0.03005    0.02321 =
         0.02625   -0.00190    0.00513    0.00169
AFIX  13
H36   2    0.463758    0.539478    0.684481    11.00000   -1.20000
AFIX   0
C37   1    0.471168    0.724604    0.849700    11.00000    0.03814    0.02972 =
         0.02221   -0.00550    0.00903   -0.00066
AFIX  13
H37   2    0.462133    0.741032    0.802215    11.00000   -1.20000
AFIX   0
C40   1    0.454324    0.850945    0.616140    11.00000    0.01479    0.01676 =
         0.02225    0.00033    0.00496   -0.00142
C41   1    0.430049    0.871181    0.546664    11.00000    0.02009    0.02036 =
         0.02440    0.00219    0.00628    0.00436
C42   1    0.428943    0.936618    0.531304    11.00000    0.03518    0.02536 =
         0.02940    0.00876    0.01218    0.00499
AFIX  43
H42   2    0.412246    0.949605    0.484923    11.00000   -1.20000
AFIX   0
C43   1    0.451167    0.983084    0.580904    11.00000    0.04031    0.01621 =
         0.05200    0.00890    0.02448    0.00187
AFIX  43
H43   2    0.449870    1.027602    0.569135    11.00000   -1.20000
AFIX   0
C44   1    0.475598    0.964037    0.648606    11.00000    0.03160    0.02058 =
         0.04033   -0.00243    0.01820    0.00031
AFIX  43
H44   2    0.492018    0.996126    0.683083    11.00000   -1.20000
AFIX   0
C45   1    0.476746    0.899601    0.667389    11.00000    0.01845    0.02106 =
         0.02713   -0.00172    0.00666   -0.00123
C46   1    0.403231    0.821073    0.490235    11.00000    0.02946    0.02923 =
         0.02029    0.00254    0.00168   -0.00018
AFIX  13
H46   2    0.431138    0.778810    0.509284    11.00000   -1.20000
AFIX   0
C47   1    0.505721    0.880108    0.742295    11.00000    0.02953    0.02451 =
         0.02486   -0.00530    0.00735    0.00241
AFIX  13
H47   2    0.471239    0.839432    0.746921    11.00000   -1.20000
AFIX   0
PART 1
O3    4    0.371472    0.614335    0.524570    21.00000    0.03627    0.03850 =
         0.03229   -0.01410   -0.00378    0.00930
C50   1    0.418059    0.553719    0.519439    21.00000    0.03994    0.04122 =
         0.03702   -0.01508   -0.00300    0.01364
AFIX  23
H50A  2    0.439295    0.531917    0.564135    21.00000   -1.20000
H50B  2    0.472138    0.559651    0.499721    21.00000   -1.20000
AFIX   0
C51   1    0.337952    0.516904    0.471118    21.00000    0.04641    0.04563 =
         0.05204   -0.01502   -0.00096    0.00980
AFIX  23
H51A  2    0.284307    0.509178    0.490877    21.00000   -1.20000
H51B  2    0.358859    0.475633    0.455220    21.00000   -1.20000
AFIX   0
C52   1    0.316238    0.571237    0.413296    21.00000    0.04358    0.04971 =
         0.04459   -0.01489   -0.00383    0.01257
AFIX  23
H52A  2    0.363750    0.571220    0.386790    21.00000   -1.20000
H52B  2    0.252996    0.565666    0.381951    21.00000   -1.20000
AFIX   0
C53   1    0.322215    0.633837    0.456768    21.00000    0.03752    0.03808 =
         0.03821   -0.00709   -0.00053    0.01008
AFIX  23
H53A  2    0.357135    0.668163    0.439865    21.00000   -1.20000
H53B  2    0.258704    0.650087    0.455610    21.00000   -1.20000
AFIX   0
PART 2
SAME O3 > C53
O3B   4    0.370677    0.616202    0.520365   -21.00000    0.03459    0.03925 =
         0.03198   -0.01924   -0.00239    0.01192
C50B  1    0.393934    0.549053    0.519120   -21.00000    0.04673    0.04139 =
         0.03529   -0.01246   -0.00455    0.01580
AFIX  23
H50C  2    0.356365    0.523354    0.543522   -21.00000   -1.20000
H50D  2    0.461271    0.542354    0.541825   -21.00000   -1.20000
AFIX   0
C51B  1    0.373033    0.527983    0.446198   -21.00000    0.04231    0.03586 =
         0.03401   -0.01071    0.00478    0.01018
AFIX  23
H51C  2    0.353800    0.482007    0.440643   -21.00000   -1.20000
H51D  2    0.427290    0.535052    0.426929   -21.00000   -1.20000
AFIX   0
C52B  1    0.289836    0.574311    0.413855   -21.00000    0.04129    0.05469 =
         0.04751   -0.01454   -0.00542    0.01516
AFIX  23
H52C  2    0.288157    0.583828    0.365883   -21.00000   -1.20000
H52D  2    0.229228    0.554641    0.415336   -21.00000   -1.20000
AFIX   0
C53B  1    0.308491    0.636832    0.457334   -21.00000    0.03802    0.04005 =
         0.03520   -0.00006   -0.00412   -0.00271
AFIX  23
H53C  2    0.338345    0.670352    0.435236   -21.00000   -1.20000
H53D  2    0.249409    0.654345    0.464586   -21.00000   -1.20000
AFIX   0
PART 0
C161  1    0.678948    0.746639    0.471916    11.00000    0.05203    0.04639 =
         0.04490    0.01099    0.00865   -0.00736
AFIX 137
H16A  2    0.728722    0.726482    0.455152    11.00000   -1.50000
H16B  2    0.706975    0.776243    0.509305    11.00000   -1.50000
H16C  2    0.636690    0.770799    0.434906    11.00000   -1.50000
AFIX   0
C162  1    0.582494    0.647640    0.440432    11.00000    0.07890    0.05514 =
         0.05782    0.00370   -0.03282   -0.01742
AFIX 137
H16D  2    0.633124    0.622273    0.430042    11.00000   -1.50000
H16E  2    0.549382    0.671932    0.399922    11.00000   -1.50000
H16F  2    0.538387    0.618500    0.454205    11.00000   -1.50000
AFIX   0
C171  1    0.684332    0.663092    0.779600    11.00000    0.03122    0.04176 =
         0.02434   -0.00509    0.00619   -0.00039
AFIX 137
H17A  2    0.750326    0.676496    0.791648    11.00000   -1.50000
H17B  2    0.664429    0.655190    0.821216    11.00000   -1.50000
H17C  2    0.645496    0.697344    0.753034    11.00000   -1.50000
AFIX   0
C172  1    0.721611    0.545392    0.781583    11.00000    0.02913    0.04511 =
         0.04044    0.01664    0.00910    0.00824
AFIX 137
H17D  2    0.719103    0.506554    0.753563    11.00000   -1.50000
H17E  2    0.689802    0.536908    0.817376    11.00000   -1.50000
H17F  2    0.787273    0.556898    0.802402    11.00000   -1.50000
AFIX   0
C261  1    0.241618    0.837593    0.709659    11.00000    0.05752    0.04189 =
         0.04482   -0.01016   -0.00489   -0.00770
AFIX 137
H26D  2    0.181388    0.841995    0.721100    11.00000   -1.50000
H26E  2    0.280112    0.876037    0.725175    11.00000   -1.50000
H26F  2    0.274470    0.799133    0.732113    11.00000   -1.50000
AFIX   0
C262  1    0.199855    0.897208    0.599336    11.00000    0.04197    0.02689 =
         0.06221    0.00070    0.01649    0.00274
AFIX 137
H26A  2    0.180747    0.892410    0.549722    11.00000   -1.50000
H26B  2    0.254980    0.925463    0.612318    11.00000   -1.50000
H26C  2    0.148234    0.916295    0.614809    11.00000   -1.50000
AFIX   0
C271  1    0.114394    0.551842    0.615162    11.00000    0.03173    0.03328 =
         0.04799    0.01353    0.01092   -0.00253
AFIX 137
H27A  2    0.141802    0.568422    0.661177    11.00000   -1.50000
H27B  2    0.138057    0.508104    0.611263    11.00000   -1.50000
H27C  2    0.045864    0.550604    0.606307    11.00000   -1.50000
AFIX   0
C272  1    0.095225    0.570495    0.491400    11.00000    0.04203    0.03316 =
         0.03878   -0.00266    0.00122   -0.00349
AFIX 137
H27D  2    0.026889    0.570331    0.484074    11.00000   -1.50000
H27E  2    0.117127    0.526335    0.487109    11.00000   -1.50000
H27F  2    0.111937    0.598279    0.457349    11.00000   -1.50000
AFIX   0
C361  1    0.498792    0.447771    0.722568    11.00000    0.04350    0.04056 =
         0.05592   -0.00881   -0.00026    0.01274
AFIX 137
H36D  2    0.473260    0.416128    0.748812    11.00000   -1.50000
H36E  2    0.565359    0.455114    0.744800    11.00000   -1.50000
H36F  2    0.492189    0.431239    0.676430    11.00000   -1.50000
AFIX   0
C362  1    0.342121    0.500787    0.693805    11.00000    0.03392    0.04034 =
         0.04390   -0.00945    0.00096    0.00228
AFIX 137
H36A  2    0.320580    0.474470    0.726827    11.00000   -1.50000
H36B  2    0.328541    0.478177    0.649997    11.00000   -1.50000
H36C  2    0.309446    0.542499    0.688029    11.00000   -1.50000
AFIX   0
C371  1    0.559064    0.756601    0.893970    11.00000    0.03644    0.03542 =
         0.04346   -0.01495    0.01353   -0.00924
AFIX 137
H37A  2    0.570863    0.740381    0.940685    11.00000   -1.50000
H37B  2    0.550004    0.803566    0.893729    11.00000   -1.50000
H37C  2    0.612863    0.746438    0.875971    11.00000   -1.50000
AFIX   0
C372  1    0.385327    0.745816    0.874146    11.00000    0.03669    0.03362 =
         0.04061   -0.00687    0.00770    0.00362
AFIX 137
H37D  2    0.328591    0.725572    0.845541    11.00000   -1.50000
H37E  2    0.379002    0.792973    0.870903    11.00000   -1.50000
H37F  2    0.393782    0.732398    0.921545    11.00000   -1.50000
AFIX   0
C461  1    0.296576    0.812286    0.466743    11.00000    0.03693    0.04544 =
         0.02983   -0.00276    0.00214   -0.01230
AFIX 137
H46A  2    0.273848    0.794800    0.504271    11.00000   -1.50000
H46B  2    0.280919    0.782246    0.428184    11.00000   -1.50000
H46C  2    0.266708    0.854190    0.452742    11.00000   -1.50000
AFIX   0
C462  1    0.441720    0.837247    0.428540    11.00000    0.04024    0.05515 =
         0.03189   -0.00572    0.01181   -0.00397
AFIX 137
H46D  2    0.414498    0.878128    0.408190    11.00000   -1.50000
H46E  2    0.424885    0.802570    0.394715    11.00000   -1.50000
H46F  2    0.510210    0.841310    0.443554    11.00000   -1.50000
AFIX   0
C471  1    0.480007    0.930511    0.789209    11.00000    0.05825    0.03848 =
         0.02972   -0.00825    0.01357    0.00853
AFIX 137
H47A  2    0.490893    0.912572    0.835181    11.00000   -1.50000
H47B  2    0.413651    0.942192    0.772028    11.00000   -1.50000
H47C  2    0.518971    0.969121    0.790533    11.00000   -1.50000
AFIX   0
C472  1    0.609407    0.865248    0.765125    11.00000    0.03921    0.07118 =
         0.02838   -0.00245    0.00284    0.00706
AFIX 137
H47D  2    0.622482    0.825698    0.742689    11.00000   -1.50000
H47E  2    0.628102    0.859089    0.814577    11.00000   -1.50000
H47F  2    0.644938    0.901311    0.752929    11.00000   -1.50000
AFIX   0
N1    3    0.556173    0.663896    0.617920    11.00000    0.01261    0.02127 =
         0.01758   -0.00237    0.00390   -0.00045
N2    3    0.280309    0.700130    0.610331    11.00000    0.01142    0.01685 =
         0.02037    0.00072    0.00223   -0.00101
N3    3    0.436310    0.650230    0.723230    11.00000    0.02091    0.01974 =
         0.01578    0.00284    0.00664    0.00269
N4    3    0.455412    0.786365    0.631517    11.00000    0.01755    0.01513 =
         0.02028    0.00138    0.00526    0.00290
O1    4    0.758577    0.819145    0.645519    11.00000    0.03476    0.03323 =
         0.04343   -0.00335    0.00894   -0.00585
O2    4    0.200416    0.624874    0.797845    11.00000    0.03253    0.03526 =
         0.03770    0.00866    0.01526    0.00155
NA1   5    0.615257    0.775277    0.627128    11.00000    0.02333    0.02769 =
         0.05511   -0.00593    0.01197   -0.00519
NA2   5    0.276865    0.670393    0.725580    11.00000    0.02514    0.05007 =
         0.03175    0.01204    0.01338    0.00368
U1    6    0.423566    0.688799    0.627995    11.00000    0.01152    0.01369 =
         0.01303   -0.00007    0.00272    0.00015
HKLF      4

REM  xl in P2(1)/n
REM R1 =  0.0325 for   10407 Fo > 4sig(Fo)  and  0.0609 for all   14103 data
REM    697 parameters refined using    160 restraints

END

WGHT      0.0195      0.0000

REM No hydrogen bonds found for HTAB generation

REM Highest difference peak  0.710,  deepest hole -0.750,  1-sigma level  0.109
Q1    1   0.3358  0.6766  0.4019  11.00000  0.05    0.71
Q2    1   0.3700  0.7379  0.6390  11.00000  0.05    0.62
Q3    1   0.4251  0.9340  0.6288  11.00000  0.05    0.61
Q4    1   0.3428  0.6642  0.6210  11.00000  0.05    0.59
Q5    1   0.4414  0.6564  0.6842  11.00000  0.05    0.58
Q6    1   0.5009  0.6672  0.6080  11.00000  0.05    0.56
Q7    1   0.3861  0.6381  0.6589  11.00000  0.05    0.52
Q8    1   0.4025  0.6529  0.5746  11.00000  0.05    0.48
Q9    1   0.5110  0.4916  0.6827  11.00000  0.05    0.47
Q10   1   0.2765  0.6676  0.4665  11.00000  0.05    0.46
Q11   1   0.4862  0.7297  0.6131  11.00000  0.05    0.45
Q12   1   0.2943  0.9482  0.5781  11.00000  0.05    0.42
Q13   1   0.6633  0.6876  0.5915  11.00000  0.05    0.42
Q14   1  -0.0047  0.6797  0.6894  11.00000  0.05    0.42
Q15   1   0.4615  0.4727  0.8291  11.00000  0.05    0.42
Q16   1   0.3836  0.6519  0.4386  11.00000  0.05    0.42
Q17   1   0.2785  0.7410  0.5497  11.00000  0.05    0.41
Q18   1   0.1881  0.8096  0.6098  11.00000  0.05    0.41
Q19   1   0.4563  0.8733  0.6463  11.00000  0.05    0.40
Q20   1   0.6117  0.8415  0.6273  11.00000  0.05    0.40
;
_shelx_res_checksum   14654

_shelx_hkl_file
;
   0   0   7   -1.13    2.25
   0   0  10   23.67    3.38
   0   0  11   -3.38    3.38
   0   0  12 2133.47   72.13
   0   0  13    6.76    6.76
   0   0  14  300.92   14.65
   0   0  15    1.13    5.64
   0   0  16  608.60   20.29
   0   0  17   -3.38    5.64
   0   0  18   14.65    6.76
   0   0  19  -10.14    4.51
   0   0  20  721.30   19.16
   0   0  21    0.00    4.51
   0   0  22   58.61    6.76
   0   0  23  -11.27   11.27
   0   0  24  295.28   23.67
   0   1   3  158.91    4.51
   0  -1  -3  178.07    5.64
   0   1   4   46.21    2.25
   0  -1  -4   43.95    2.25
   0   1   5   16.91    2.25
   0  -1  -5   12.40    3.38
   0   1   6 5206.87  167.93
   0  -1  -6 5062.61  118.34
   0   1   7   58.61    4.51
   0  -1  -7   66.49    3.38
   0  -1  -8   -2.25    3.38
   0  -1  -9  220.90    9.02
   0   1  10 2052.32   51.84
   0  -1 -10 2021.89   85.65
   0   1  11  265.98   10.14
   0   1  12   57.48    5.64
   0   1  13   96.92    9.02
   0   1  14 1496.69   51.84
   0  -1 -14 1460.63   51.84
   0   1  15  110.45    7.89
   0  -1 -15   92.42   10.14
   0   1  16    6.76    5.64
   0  -1 -16   16.91    6.76
   0   1  17  344.87   12.40
   0  -1 -17  341.49   12.40
   0   1  18 1076.31   31.56
   0  -1 -18 1093.22   30.43
   0   1  19  108.19    7.89
   0  -1 -19   93.54   10.14
   0   1  20   56.35    6.76
   0  -1 -20   54.10    7.89
   0   1  21   23.67    6.76
   0  -1 -21   30.43    9.02
   0   1  22  368.54   16.91
   0  -1 -22  379.81   16.91
   0   1  23   31.56   12.40
   0  -1 -23   18.03    9.02
   0   1  24   72.13   12.40
   0  -1 -24   61.99    9.02
   0   2   3  544.35   16.91
   0  -2  -3  431.65   23.67
   0   2   4 2862.65  113.83
   0  -2  -5  173.56    7.89
   0   2   6   49.59    4.51
   0  -2  -6   41.70    3.38
   0   2   7  173.56    6.76
   0  -2  -7  167.93    7.89
   0   2   8 2771.36   69.88
   0  -2  -8 2769.11   67.62
   0   2   9  139.75    5.64
   0  -2  -9  143.13    6.76
   0   2  10   67.62    4.51
   0  -2 -10   63.11    4.51
   0   2  11  302.04   10.14
   0  -2 -11  296.41   10.14
   0   2  12 1023.34   29.30
   0  -2 -12 1105.62   30.43
   0   2  13  568.02   16.91
   0  -2 -13  524.07   21.41
   0   2  14   34.94    4.51
   0  -2 -14   13.52    5.64
   0   2  15   11.27    5.64
   0  -2 -15   11.27    5.64
   0   2  16  888.10   27.05
   0  -2 -16  955.72   29.30
   0   2  17  222.02   10.14
   0  -2 -17  253.58   11.27
   0   2  18   21.41   10.14
   0  -2 -18   24.79    7.89
   0   2  19  291.90   14.65
   0  -2 -19  291.90   13.52
   0   2  20  297.54   14.65
   0  -2 -20  276.12   13.52
   0   2  21  163.42   11.27
   0  -2 -21  174.69   10.14
   0   2  22   59.73    9.02
   0  -2 -22   47.34    7.89
   0   2  23   48.46   13.52
   0  -2 -23   25.92    7.89
   0   2  24  127.35   16.91
   0  -2 -24  111.58   12.40
   0  -2 -25   99.18   15.78
   0   3   0    2.25    1.13
   0  -3   0    1.13    1.13
   0   3   2  504.91   14.65
   0  -3  -2  507.16   14.65
   0   3   3  263.72    9.02
   0  -3  -3  269.36    9.02
   0   3   4  176.94    9.02
   0  -3  -4  145.39   10.14
   0   3   5 1821.28   67.62
   0  -3  -5 1695.05   59.73
   0   3   6  196.10   11.27
   0  -3  -6  190.47    7.89
   0   3   7  489.13   21.41
   0  -3  -7  497.02   19.16
   0   3   8  405.73   20.29
   0  -3  -8  388.82   15.78
   0   3   9  279.50   14.65
   0  -3  -9  267.11   20.29
   0   3  10  148.77   10.14
   0  -3 -10  152.15    6.76
   0   3  11 1001.93   38.32
   0  -3 -11  985.02   27.05
   0   3  12   50.72   10.14
   0  -3 -12   58.61    5.64
   0   3  13  112.70   10.14
   0  -3 -13  118.34    5.64
   0   3  14  253.58   18.03
   0  -3 -14  228.79   13.52
   0   3  15  322.33   21.41
   0  -3 -15  396.71   13.52
   0   3  16  119.47   12.40
   0  -3 -16  129.61    7.89
   0   3  17  410.24   28.18
   0  -3 -17  462.08   15.78
   0   3  18   16.91   10.14
   0  -3 -18   27.05    6.76
   0   3  19  483.50   19.16
   0  -3 -19  463.21   16.91
   0   3  20   18.03    5.64
   0  -3 -20   11.27    7.89
   0   3  21   85.65    9.02
   0  -3 -21   86.78    9.02
   0   3  22   93.54   10.14
   0  -3 -22   71.00    9.02
   0   3  23  273.87   22.54
   0  -3 -23  253.58   12.40
   0   3  24   51.84   13.52
   0  -3 -24   63.11    9.02
   0  -3 -25   25.92   13.52
   0   4   0  976.01   50.72
   0   4   1  722.43   40.57
   0  -4  -1 1284.81   28.18
   0   4   2   48.46    3.38
   0  -4  -2   50.72    3.38
   0   4   3 1360.32   37.19
   0  -4  -3 1425.69   37.19
   0   4   4  404.60   12.40
   0  -4  -4  378.68   20.29
   0   4   5  190.47   10.14
   0   4   6  216.39   12.40
   0  -4  -6  218.64   10.14
   0   4   7  699.88   31.56
   0  -4  -7  661.57   24.79
   0   4   8   99.18    9.02
   0  -4  -8   94.67    7.89
   0   4   9 1151.82   46.21
   0  -4  -9 1051.52   36.06
   0   4  10   16.91    6.76
   0  -4 -10   18.03    4.51
   0   4  11  279.50   16.91
   0  -4 -11  290.77   14.65
   0   4  12    0.00    4.51
   0  -4 -12   -4.51    4.51
   0   4  13  946.70   42.83
   0  -4 -13  937.69   25.92
   0   4  14   -4.51    5.64
   0  -4 -14   -5.64    4.51
   0   4  15  130.74   16.91
   0  -4 -15  155.53    7.89
   0   4  16   10.14    9.02
   0  -4 -16    0.00    4.51
   0   4  17  564.64   28.18
   0  -4 -17  554.50   18.03
   0   4  18   37.19   11.27
   0  -4 -18   39.45    7.89
   0   4  19  199.48   11.27
   0  -4 -19  190.47   11.27
   0   4  20   -3.38    5.64
   0  -4 -20    1.13    6.76
   0   4  21  428.27   18.03
   0  -4 -21  403.48   15.78
   0   4  22   -3.38    7.89
   0  -4 -22   -6.76    7.89
   0   4  23   32.68   10.14
   0  -4 -23   54.10   11.27
   0   4  24  -11.27   11.27
   0  -4 -24    7.89    7.89
   0  -4 -25  184.83   15.78
   0   5   1  578.17   30.43
   0  -5  -1  701.01   15.78
   0  -5  -2 1155.20   30.43
   0   5   3  942.20   25.92
   0  -5  -3  867.81   24.79
   0   5   4   41.70    5.64
   0  -5  -4   39.45    3.38
   0   5   5  998.55   37.19
   0  -5  -5  737.08   47.34
   0   5   6  191.59   10.14
   0   5   7  136.37   10.14
   0  -5  -7  129.61    7.89
   0   5   8   61.99    6.76
   0  -5  -8   47.34    5.64
   0   5   9  953.47   37.19
   0  -5  -9  956.85   36.06
   0   5  10  617.61   27.05
   0  -5 -10  573.66   21.41
   0   5  11  702.14   29.30
   0  -5 -11  659.31   24.79
   0   5  12   86.78   10.14
   0  -5 -12   91.29    6.76
   0   5  13  422.64   30.43
   0  -5 -13  330.22   15.78
   0   5  14  117.21   11.27
   0  -5 -14  108.19    6.76
   0   5  15  527.45   25.92
   0  -5 -15  524.07   16.91
   0   5  16    7.89    6.76
   0  -5 -16   -5.64    4.51
   0   5  17  155.53   16.91
   0  -5 -17  152.15    7.89
   0   5  18   95.80    9.02
   0  -5 -18  109.32    6.76
   0   5  19  302.04   14.65
   0  -5 -19  298.66   12.40
   0   5  20   10.14    7.89
   0  -5 -20    5.64    6.76
   0   5  21   75.51   10.14
   0  -5 -21   52.97    9.02
   0   5  22   73.26    9.02
   0  -5 -22   86.78   10.14
   0   5  23  401.22   25.92
   0  -5 -23  380.94   16.91
   0  -5 -24   11.27    9.02
   0  -5 -25   34.94   14.65
   0   6   1  165.67   11.27
   0  -6  -1  217.52    7.89
   0   6   2  145.39    9.02
   0  -6  -2  161.17    5.64
   0   6   3  554.50   18.03
   0  -6  -3  562.39   22.54
   0   6   4  258.09   12.40
   0  -6  -4  261.47   13.52
   0   6   5  356.14   12.40
   0  -6  -5  369.67   18.03
   0   6   6   13.52    3.38
   0  -6  -6    2.25    4.51
   0   6   7  517.31   23.67
   0  -6  -7  500.40   22.54
   0   6   8  821.60   33.81
   0  -6  -8  788.92   30.43
   0   6   9  779.90   33.81
   0  -6  -9  740.46   23.67
   0   6  10  104.81   11.27
   0  -6 -10  157.78   10.14
   0   6  11  108.19   11.27
   0  -6 -11  110.45   10.14
   0   6  12 1255.51   64.24
   0  -6 -12 1034.61   38.32
   0   6  13  271.61   15.78
   0  -6 -13  276.12   14.65
   0   6  14  200.61   14.65
   0  -6 -14  196.10   10.14
   0   6  15  225.41   13.52
   0  -6 -15  225.41   10.14
   0   6  16  476.73   23.67
   0  -6 -16  490.26   14.65
   0   6  17  203.99   15.78
   0  -6 -17  203.99    7.89
   0   6  18   -1.13    6.76
   0  -6 -18    1.13    5.64
   0   6  19   36.06    6.76
   0  -6 -19   48.46    5.64
   0   6  20  219.77   13.52
   0  -6 -20  238.93   13.52
   0   6  21  191.59   11.27
   0  -6 -21  192.72   10.14
   0   6  22   38.32    9.02
   0  -6 -22   37.19    7.89
   0   6  23   33.81   12.40
   0  -6 -23   30.43   10.14
   0  -6 -24   72.13    9.02
   0  -6 -25  130.74   13.52
   0  -7   0   -3.38    3.38
   0   7   1   12.40    3.38
   0  -7  -1   16.91    3.38
   0   7   2 6081.45  260.34
   0  -7  -2 2279.98   56.35
   0   7   3  180.32   11.27
   0  -7  -3  197.23   10.14
   0   7   4   29.30    4.51
   0  -7  -4   27.05    5.64
   0   7   5   49.59    5.64
   0  -7  -5   52.97    4.51
   0   7   6 2461.43   63.11
   0  -7  -6 2227.01   64.24
   0   7   7  231.04    9.02
   0  -7  -7  223.15   14.65
   0   7   8    7.89    4.51
   0  -7  -8   12.40    4.51
   0   7   9  193.85    9.02
   0  -7  -9  198.36   11.27
   0   7  10 1607.14   42.83
   0  -7 -10 1595.87   57.48
   0   7  11   65.37   12.40
   0  -7 -11   49.59    7.89
   0   7  12   69.88    9.02
   0  -7 -12   78.89    9.02
   0   7  13   20.29    6.76
   0  -7 -13   32.68   12.40
   0   7  14 1051.52   41.70
   0  -7 -14 1013.20   31.56
   0   7  15  140.88    9.02
   0  -7 -15  170.18    9.02
   0   7  16  119.47   12.40
   0  -7 -16  145.39    7.89
   0   7  17   22.54    6.76
   0  -7 -17   15.78    5.64
   0   7  18  365.16   16.91
   0  -7 -18  359.52   12.40
   0   7  19   30.43    9.02
   0  -7 -19   29.30    5.64
   0   7  20   58.61    7.89
   0  -7 -20   64.24    7.89
   0   7  21   13.52    9.02
   0  -7 -21   23.67    7.89
   0   7  22  330.22   16.91
   0  -7 -22  338.11   15.78
   0   7  23   51.84   13.52
   0  -7 -23   43.95    7.89
   0  -7 -24   37.19   11.27
   0  -7 -25    5.64   10.14
   0  -8   0 2266.46   81.15
   0   8   1  170.18   11.27
   0  -8  -1  171.31    6.76
   0   8   2    2.25    3.38
   0  -8  -2   -1.13    2.25
   0  -8  -3    2.25    2.25
   0   8   4 1567.70   60.86
   0  -8  -4 1573.33   57.48
   0   8   5    9.02    4.51
   0  -8  -5    6.76    4.51
   0   8   6   38.32    7.89
   0  -8  -6   27.05    6.76
   0   8   7   25.92    4.51
   0  -8  -7   10.14    4.51
   0   8   8 2568.50   65.37
   0  -8  -8 2553.85   91.29
   0   8   9   14.65    4.51
   0   8  10    5.64    7.89
   0  -8 -10   10.14    4.51
   0   8  11   49.59    9.02
   0  -8 -11   33.81    6.76
   0   8  12  686.36   29.30
   0  -8 -12  707.77   23.67
   0   8  13    0.00    4.51
   0  -8 -13   -5.64    4.51
   0   8  14  162.29   10.14
   0  -8 -14  163.42   10.14
   0   8  15   -3.38    4.51
   0  -8 -15    2.25    6.76
   0   8  16  586.05   28.18
   0  -8 -16  589.44   19.16
   0   8  17   13.52    6.76
   0  -8 -17  -10.14    5.64
   0   8  18   67.62    9.02
   0  -8 -18   66.49    5.64
   0   8  19   12.40    6.76
   0  -8 -19    1.13    5.64
   0   8  20  498.15   19.16
   0  -8 -20  469.97   13.52
   0   8  21   -6.76    7.89
   0  -8 -21   -7.89    6.76
   0   8  22   67.62   15.78
   0  -8 -22  105.94   12.40
   0   8  23  -12.40   12.40
   0  -8 -23   -3.38    9.02
   0  -8 -24  241.18   13.52
   0  -9   0    5.64    5.64
   0  -9  -1  385.44   12.40
   0  -9  -2 3199.63   78.89
   0   9   3  357.27   20.29
   0  -9  -3  379.81   16.91
   0   9   4   54.10    7.89
   0  -9  -4   58.61    4.51
   0   9   5  375.30   14.65
   0  -9  -5  387.70   18.03
   0   9   6 1551.92   42.83
   0  -9  -6 1497.82   61.99
   0   9   7   18.03    5.64
   0  -9  -7   21.41    4.51
   0   9   8   24.79    5.64
   0   9   9  224.28   10.14
   0  -9  -9  217.52   14.65
   0   9  10 1114.63   31.56
   0  -9 -10 1103.36   33.81
   0   9  11  158.91   13.52
   0  -9 -11  152.15   10.14
   0   9  12   54.10    6.76
   0  -9 -12   59.73    6.76
   0   9  13   12.40    4.51
   0  -9 -13    1.13    5.64
   0   9  14  826.11   27.05
   0  -9 -14  765.25   25.92
   0   9  15  126.23    9.02
   0  -9 -15  119.47    9.02
   0   9  16   34.94    6.76
   0  -9 -16   33.81    7.89
   0   9  17   71.00    9.02
   0  -9 -17   65.37    6.76
   0   9  18  333.60   14.65
   0  -9 -18  355.01   12.40
   0   9  19   48.46    7.89
   0  -9 -19   39.45    6.76
   0   9  20  108.19   10.14
   0  -9 -20   96.92    7.89
   0   9  21    6.76    9.02
   0  -9 -21   -6.76   10.14
   0   9  22  256.96   22.54
   0  -9 -22  281.76   14.65
   0   9  23   45.08   13.52
   0  -9 -23   50.72   12.40
   0  -9 -24   67.62   10.14
   0 -10   0  609.72   32.68
   0 -10  -1  587.18   18.03
   0 -10  -2   16.91    4.51
   0 -10  -3  725.81   31.56
   0  10   4 1115.76   54.10
   0 -10  -4 1208.17   36.06
   0  10   5  199.48   10.14
   0 -10  -5  182.58    7.89
   0  10   6   37.19    5.64
   0 -10  -6   41.70    6.76
   0  10   7  483.50   18.03
   0 -10  -7  460.95   22.54
   0  10   8  999.67   32.68
   0 -10  -8  999.67   32.68
   0  10   9  687.49   22.54
   0 -10  -9  707.77   27.05
   0  10  10   10.14    6.76
   0 -10 -10    5.64    5.64
   0  10  11   52.97    9.02
   0 -10 -11   57.48    5.64
   0  10  12  132.99    9.02
   0 -10 -12  151.02    9.02
   0  10  13  369.67   15.78
   0 -10 -13  364.03   14.65
   0  10  14    3.38    5.64
   0 -10 -14    1.13    4.51
   0  10  15  294.15   13.52
   0 -10 -15  281.76   12.40
   0  10  16  397.84   16.91
   0 -10 -16  420.38   15.78
   0  10  17  244.57   12.40
   0 -10 -17  229.91   11.27
   0  10  18  109.32   12.40
   0 -10 -18  102.56   13.52
   0  10  19  117.21   11.27
   0 -10 -19   96.92    6.76
   0  10  20  144.26   13.52
   0 -10 -20  178.07   11.27
   0  10  21  216.39   13.52
   0 -10 -21  201.74   12.40
   0  10  22   84.53   12.40
   0 -10 -22  101.43   13.52
   0 -10 -23    6.76    7.89
   0 -10 -24  121.72   14.65
   0 -11   0   -5.64    7.89
   0 -11  -1  918.53   27.05
   0 -11  -2  978.26   31.56
   0 -11  -3 1810.01   63.11
   0  11   4    1.13    4.51
   0 -11  -4   -9.02    3.38
   0  11   5  375.30   20.29
   0 -11  -5  367.41   15.78
   0  11   6  583.80   20.29
   0 -11  -6  570.28   19.16
   0  11   7  503.78   23.67
   0 -11  -7  466.59   18.03
   0  11   8   28.18    5.64
   0 -11  -8   33.81    6.76
   0  11   9  515.05   20.29
   0 -11  -9  534.21   18.03
   0  11  10  130.74    9.02
   0 -11 -10  123.97   10.14
   0  11  11  818.22   25.92
   0 -11 -11  778.78   21.41
   0  11  12    0.00    6.76
   0 -11 -12    3.38    4.51
   0  11  13  237.80   11.27
   0 -11 -13  228.79   11.27
   0  11  14   59.73    7.89
   0 -11 -14   66.49    7.89
   0  11  15  613.10   22.54
   0 -11 -15  595.07   18.03
   0  11  16    4.51    6.76
   0 -11 -16    5.64    5.64
   0  11  17  129.61   11.27
   0 -11 -17  109.32   10.14
   0  11  18   91.29   11.27
   0 -11 -18  101.43    9.02
   0  11  19  287.39   13.52
   0 -11 -19  289.65   18.03
   0  11  20   29.30   10.14
   0 -11 -20   22.54    6.76
   0  11  21   41.70   12.40
   0 -11 -21   30.43    9.02
   0  11  22   63.11   12.40
   0 -11 -22   41.70   10.14
   0 -11 -23  241.18   14.65
   0 -12   0   24.79    6.76
   0 -12  -1  973.75   25.92
   0 -12  -2   -2.25    3.38
   0  12   3  595.07   29.30
   0 -12  -3  624.37   19.16
   0  12   4    4.51    5.64
   0 -12  -4    2.25    3.38
   0  12   5  417.00   22.54
   0 -12  -5  392.21   12.40
   0  12   6   -2.25    5.64
   0 -12  -6   -6.76    4.51
   0  12   7  535.34   28.18
   0 -12  -7  510.54   15.78
   0  12   8   51.84    9.02
   0 -12  -8   67.62    7.89
   0  12   9  972.63   31.56
   0 -12  -9  968.12   29.30
   0  12  10    6.76    5.64
   0 -12 -10   -4.51    6.76
   0  12  11  606.34   19.16
   0 -12 -11  586.05   21.41
   0  12  12   31.56    6.76
   0 -12 -12   36.06    6.76
   0  12  13  546.61   20.29
   0 -12 -13  534.21   15.78
   0  12  14    3.38    6.76
   0 -12 -14   25.92    5.64
   0  12  15  305.42   14.65
   0 -12 -15  279.50   11.27
   0  12  16   -4.51    5.64
   0 -12 -16    6.76    6.76
   0  12  17  521.81   20.29
   0 -12 -17  534.21   18.03
   0  12  18    3.38    6.76
   0 -12 -18   -3.38    6.76
   0  12  19  101.43   10.14
   0 -12 -19   99.18   13.52
   0  12  20   12.40    9.02
   0 -12 -20   -5.64    7.89
   0  12  21  417.00   25.92
   0 -12 -21  402.35   20.29
   0  12  22   16.91   13.52
   0 -12 -22    5.64   10.14
   0 -12 -23   31.56    9.02
   0 -13   0    2.25    4.51
   0 -13  -1  618.74   20.29
   0 -13  -2  197.23    9.02
   0  13   3  663.82   30.43
   0 -13  -3  654.80   19.16
   0  13   4  105.94   12.40
   0 -13  -4  119.47    7.89
   0  13   5  741.58   34.94
   0 -13  -5  714.54   20.29
   0  13   6    2.25    9.02
   0 -13  -6    9.02    4.51
   0  13   7 1542.90   64.24
   0 -13  -7 1346.80   33.81
   0  13   8   37.19   11.27
   0 -13  -8   45.08    6.76
   0  13   9  237.80   12.40
   0 -13  -9  246.82   10.14
   0  13  10   21.41    7.89
   0 -13 -10   19.16    6.76
   0  13  11  474.48   20.29
   0 -13 -11  475.61   18.03
   0  13  12  191.59   12.40
   0 -13 -12  180.32    9.02
   0  13  13  232.17   12.40
   0 -13 -13  238.93   13.52
   0  13  14   24.79    9.02
   0 -13 -14   24.79    6.76
   0  13  15  442.92   18.03
   0 -13 -15  439.54   14.65
   0  13  16    4.51    9.02
   0 -13 -16    2.25    5.64
   0  13  17  155.53   12.40
   0 -13 -17  152.15   13.52
   0  13  18   31.56   11.27
   0 -13 -18   22.54    9.02
   0  13  19  440.67   27.05
   0 -13 -19  417.00   21.41
   0  13  20    9.02   13.52
   0  13  21   56.35   12.40
   0 -13 -21   41.70   10.14
   0 -13 -22   34.94   12.40
   0 -13 -23  154.40   25.92
   0 -14   0  568.02   31.56
   0 -14  -1  347.12   12.40
   0 -14  -2   -5.64    4.51
   0 -14  -3  477.86   15.78
   0 -14  -4  259.22   10.14
   0  14   5  681.85   33.81
   0 -14  -5  658.18   18.03
   0  14   6    2.25    7.89
   0 -14  -6   -4.51    4.51
   0  14   7  295.28   18.03
   0 -14  -7  275.00   10.14
   0  14   8  404.60   22.54
   0 -14  -8  388.82   13.52
   0  14   9  256.96   18.03
   0 -14  -9  244.57   13.52
   0  14  10   81.15   13.52
   0 -14 -10   75.51    6.76
   0  14  11  587.18   22.54
   0 -14 -11  559.01   16.91
   0  14  12  182.58   14.65
   0 -14 -12  215.26   10.14
   0  14  13  213.01   12.40
   0 -14 -13  240.06   11.27
   0  14  14   30.43    6.76
   0 -14 -14   21.41    6.76
   0  14  15   82.27   11.27
   0 -14 -15   93.54    7.89
   0  14  16  184.83   15.78
   0 -14 -16  183.71   13.52
   0  14  17  312.19   16.91
   0 -14 -17  299.79   18.03
   0  14  18   14.65   13.52
   0 -14 -18   27.05   10.14
   0  14  19   18.03   14.65
   0 -14 -19   22.54   12.40
   0  14  20  244.57   20.29
   0 -14 -20  192.72   25.92
   0  14  21  163.42   19.16
   0 -14 -21  137.50   20.29
   0 -14 -22   13.52   10.14
   0 -15   0    5.64    5.64
   0 -15  -1  189.34   10.14
   0 -15  -2  478.99   14.65
   0 -15  -3  260.34    9.02
   0 -15  -4    7.89    4.51
   0  15   5  134.12   14.65
   0 -15  -5  114.96    7.89
   0  15   6  790.05   37.19
   0 -15  -6  787.79   20.29
   0  15   7  355.01   21.41
   0 -15  -7  347.12   12.40
   0  15   8  388.82   23.67
   0 -15  -8  380.94   12.40
   0  15   9  191.59   16.91
   0 -15  -9  201.74   10.14
   0  15  10  369.67   24.79
   0 -15 -10  361.78   13.52
   0  15  11  100.31   13.52
   0 -15 -11  110.45    9.02
   0  15  12  122.85   14.65
   0 -15 -12  109.32   10.14
   0  15  13   11.27    7.89
   0 -15 -13    6.76    5.64
   0  15  14  394.46   25.92
   0 -15 -14  369.67   12.40
   0  15  15  170.18   11.27
   0 -15 -15  166.80   11.27
   0  15  16   28.18   11.27
   0 -15 -16   30.43    7.89
   0  15  17   19.16   10.14
   0 -15 -17   20.29   12.40
   0  15  18  326.84   23.67
   0 -15 -18  340.36   22.54
   0  15  19   41.70   12.40
   0 -15 -19   32.68   14.65
   0  15  20   60.86   12.40
   0 -15 -20   42.83   19.16
   0  15  21    1.13   11.27
   0 -15 -21  -14.65   20.29
   0 -16   0  928.67   30.43
   0 -16  -1    0.00    4.51
   0 -16  -2   -7.89    4.51
   0 -16  -3   -2.25    4.51
   0 -16  -4  295.28   10.14
   0  16   5  197.23   16.91
   0 -16  -5  225.41   10.14
   0  16   6   61.99   11.27
   0 -16  -6   40.57    6.76
   0  16   7   19.16    9.02
   0 -16  -7    6.76    4.51
   0 -16  -8  848.65   23.67
   0  16   9   34.94   13.52
   0 -16  -9   46.21    6.76
   0  16  10   18.03    9.02
   0 -16 -10    3.38    5.64
   0  16  11    7.89    9.02
   0 -16 -11    3.38    6.76
   0  16  12  630.01   31.56
   0 -16 -12  600.71   21.41
   0  16  13   15.78   11.27
   0 -16 -13   25.92    5.64
   0  16  14   37.19   10.14
   0 -16 -14   20.29    9.02
   0  16  15   49.59   14.65
   0 -16 -15   21.41    9.02
   0  16  16  422.64   29.30
   0 -16 -16  436.16   22.54
   0 -16 -17  -23.67   11.27
   0  16  18   83.40   13.52
   0 -16 -18   87.91   21.41
   0  16  19    6.76   15.78
   0 -16 -19 -149.89   45.08
   0  16  20  249.07   23.67
   0 -16 -20  200.61   23.67
   0 -16 -21  -36.06   21.41
   0 -17   0    5.64    5.64
   0 -17  -1    4.51    4.51
   0 -17  -2  314.44   10.14
   0 -17  -3   23.67    5.64
   0 -17  -4   -5.64    6.76
   0  17   5   14.65    9.02
   0 -17  -5   25.92    5.64
   0  17   6  622.12   34.94
   0 -17  -6  628.88   19.16
   0  17   7   61.99   13.52
   0 -17  -7   47.34    7.89
   0 -17  -8    3.38    7.89
   0  17   9   14.65   10.14
   0 -17  -9   -1.13    6.76
   0  17  10  367.41   29.30
   0 -17 -10  411.37   15.78
   0  17  11    3.38   13.52
   0 -17 -11    5.64    6.76
   0  17  12  119.47   14.65
   0 -17 -12   81.15   10.14
   0  17  13    7.89   12.40
   0 -17 -13    6.76   11.27
   0  17  14  464.34   23.67
   0 -17 -14  494.77   21.41
   0  17  15    5.64   11.27
   0 -17 -15   10.14   12.40
   0  17  16   75.51   13.52
   0 -17 -16   76.64   12.40
   0  17  17  -12.40   10.14
   0 -17 -17   16.91   19.16
   0  17  18  277.25   23.67
   0 -17 -18  214.14   22.54
   0  17  19   46.21   12.40
   0 -17 -19  -64.24   42.83
   0  17  20   23.67   13.52
   0 -17 -20   40.57   21.41
   0 -18   0  234.42   13.52
   0 -18  -1  138.62    7.89
   0 -18  -2   31.56    5.64
   0 -18  -3   64.24    6.76
   0 -18  -4  438.41   14.65
   0 -18  -5  262.60   10.14
   0  18   6   -2.25    9.02
   0 -18  -6   10.14    6.76
   0  18   7   69.88   14.65
   0 -18  -7   54.10    9.02
   0  18   8  369.67   23.67
   0 -18  -8  334.73   18.03
   0  18   9  117.21   13.52
   0 -18  -9  122.85   10.14
   0  18  10   56.35   14.65
   0 -18 -10   41.70   10.14
   0  18  11   52.97   12.40
   0 -18 -11   50.72    9.02
   0  18  12  238.93   21.41
   0 -18 -12  247.95   15.78
   0  18  13  146.51   16.91
   0 -18 -13  142.01   13.52
   0  18  14   -1.13   13.52
   0 -18 -14   -6.76   11.27
   0 -18 -15   10.14   13.52
   0  18  16  293.03   22.54
   0 -18 -16  305.42   25.92
   0  18  17  127.35   14.65
   0 -18 -17  135.24   20.29
   0  18  18   25.92   12.40
   0 -18 -18   21.41   21.41
   0  18  19   14.65   12.40
   0 -18 -19   24.79   15.78
   0 -19   0   -5.64    9.02
   0 -19  -1  222.02   10.14
   0 -19  -2  134.12    9.02
   0 -19  -3  251.33   10.14
   0 -19  -4   11.27    5.64
   0 -19  -5  229.91   10.14
   0 -19  -6  171.31    9.02
   0 -19  -7  251.33   11.27
   0  19   8  -10.14   10.14
   0 -19  -8   -3.38   13.52
   0  19   9  148.77   18.03
   0 -19  -9  145.39   13.52
   0  19  10   73.26   16.91
   0 -19 -10   51.84   12.40
   0  19  11  234.42   19.16
   0 -19 -11  249.07   15.78
   0  19  12   -1.13   14.65
   0 -19 -12  -13.52   18.03
   0  19  13  109.32   14.65
   0 -19 -13   84.53   18.03
   0  19  14   82.27   14.65
   0 -19 -14   80.02   21.41
   0 -19 -15  225.41   22.54
   0  19  16   -1.13   16.91
   0 -19 -16  -12.40   20.29
   0  19  17   33.81   16.91
   0  19  18   37.19   16.91
   0 -19 -18   47.34   23.67
   0 -20   0   31.56    9.02
   0 -20  -1  305.42   11.27
   0 -20  -2  -12.40    5.64
   0 -20  -3  293.03   11.27
   0 -20  -4    7.89   10.14
   0 -20  -5  329.09   16.91
   0 -20  -6    5.64    7.89
   0 -20  -7  244.57   13.52
   0 -20  -8   20.29    9.02
   0  20   9  304.30   22.54
   0 -20  -9  341.49   18.03
   0  20  10   27.05   16.91
   0 -20 -10   10.14    9.02
   0  20  11  187.09   19.16
   0 -20 -11  164.55   21.41
   0  20  12  -10.14   16.91
   0 -20 -12  -22.54   19.16
   0  20  13  348.25   27.05
   0 -20 -13  297.54   28.18
   0  20  14   12.40   11.27
   0 -20 -14    3.38   14.65
   0  20  15  110.45   16.91
   0 -20 -15  174.69   25.92
   0  20  16    1.13   15.78
   0 -20 -16   18.03   15.78
   0  20  17  385.44   28.18
   0 -20 -17  397.84   33.81
   0 -21  -1  474.48   30.43
   0 -21  -2   24.79   10.14
   0 -21  -3  462.08   21.41
   0 -21  -4    6.76    9.02
   0 -21  -5  236.68   14.65
   0 -21  -6   69.88   15.78
   0 -21  -7  309.93   19.16
   0 -21  -8   12.40    9.02
   0 -21  -9  208.50   15.78
   0 -21 -10   23.67   11.27
   0  21  11  377.55   27.05
   0 -21 -11  433.91   21.41
   0  21  12   39.45   14.65
   0 -21 -12   22.54   15.78
   0  21  13  109.32   21.41
   0 -21 -13   92.42   24.79
   0  21  14   29.30   13.52
   0 -21 -14   10.14   15.78
   0  21  15  273.87   22.54
   0 -21 -15  361.78   32.68
   0  21  16    4.51   12.40
   0 -21 -16   27.05   16.91
   0 -22   0  157.78   16.91
   0 -22  -1  296.41   15.78
   0 -22  -2    7.89   10.14
   0 -22  -3  211.88   18.03
   0 -22  -4  184.83   24.79
   0 -22  -5  233.29   18.03
   0 -22  -6   11.27    9.02
   0 -22  -7  135.24   14.65
   0 -22  -8  113.83   12.40
   0 -22  -9  359.52   20.29
   0 -22 -10   16.91   11.27
   0 -22 -11   77.76   13.52
   0 -22 -12  174.69   14.65
   0 -22 -13  214.14   18.03
   0 -22 -14    4.51   12.40
   0  22  15   65.37   14.65
   0 -22 -15   55.22   12.40
   0 -23   0    1.13   13.52
   0 -23  -1  165.67   13.52
   0 -23  -2  428.27   20.29
   0 -23  -3   96.92   13.52
   0 -23  -4    3.38   11.27
   0 -23  -5   52.97   12.40
   0 -23  -6  315.57   16.91
   0 -23  -7   92.42   14.65
   0 -23  -8  -16.91   11.27
   0 -23  -9   90.16   13.52
   0 -23 -10  263.72   16.91
   0 -23 -11   98.05   14.65
   0 -23 -12   -1.13   11.27
   0 -23 -13    4.51   15.78
   0 -23 -14  190.47   16.91
   0 -24   0  439.54   34.94
   0 -24  -1   23.67   14.65
   0 -24  -2    4.51   13.52
   0 -24  -3   16.91   12.40
   0 -24  -4  417.00   22.54
   0 -24  -5   30.43   15.78
   0 -24  -6    1.13   12.40
   0 -24  -7   -5.64   15.78
   0 -24  -8  361.78   21.41
   0 -24  -9   24.79   11.27
   0 -24 -10   20.29   11.27
   0 -24 -11   13.52   15.78
   0 -24 -12  240.06   18.03
   0 -25   0   -2.25   14.65
   0 -25  -1   -3.38   10.14
   0 -25  -2  357.27   22.54
   0 -25  -3   -5.64   15.78
   0 -25  -4   18.03   11.27
   0 -25  -5    3.38   13.52
   0 -25  -6  371.92   20.29
   0 -25  -7   -6.76   11.27
   0 -25  -8   -5.64   13.52
   0 -25  -9   20.29   12.40
   0 -25 -10  322.33   21.41
   0 -26   0  214.14   25.92
   0 -26  -1   19.16   13.52
   0 -26  -2    9.02   13.52
   0 -26  -3   29.30   16.91
   0 -26  -4  229.91   18.03
   0 -26  -5   30.43   14.65
   0 -26  -6    1.13   16.91
   0 -26  -7   28.18   14.65
   0 -26  -8  193.85   28.18
   0 -27   0  -19.16   23.67
   0 -27  -1   60.86   15.78
   0 -27  -2   28.18   13.52
   0 -27  -3   86.78   14.65
   0 -27  -4    6.76   24.79
   1   0 -24   -1.13   10.14
   1   0 -23  563.51   21.41
   1   0 -22   -6.76    5.64
   1   0 -21   13.52    5.64
   1   0 -20   -1.13    4.51
   1   0 -19 1084.20   31.56
   1   0 -18   -9.02    5.64
   1   0 -17   91.29    6.76
   1   0 -16   -2.25    7.89
   1   0 -14    1.13    5.64
   1   0 -13   30.43    5.64
   1   0 -12   -7.89    3.38
   1   0 -11 3838.66   94.67
   1   0  -9  480.11   22.54
   1   0  -8   -5.64    2.25
   1   0  -7 3464.49  111.58
   1   0  -6    2.25    2.25
   1   0  -5  137.50    5.64
   1   0  -4    4.51    2.25
   1   0  -2    0.00    0.01
   1   0   2    5.64    1.13
   1   0   3   13.52    1.13
   1   0   4    1.13    2.25
   1   0   5  640.15   25.92
   1   0   8    3.38    2.25
   1   0   9 1265.65   41.70
   1   0  12   -4.51    5.64
   1   0  13 1331.02   47.34
   1   0  14   -2.25    5.64
   1   0  15  649.17   21.41
   1   0  16   -1.13    5.64
   1   0  17  792.30   23.67
   1   0  18   -7.89    5.64
   1   0  19  537.59   18.03
   1   0  20    9.02    5.64
   1   0  21  368.54   18.03
   1   0  22   -1.13    9.02
   1   0  23  211.88   21.41
   1   0  24    0.00   10.14
  -1  -1  25  216.39   18.03
   1   1 -24    9.02   10.14
  -1  -1  24   -2.25    7.89
   1   1 -23    0.00   10.14
  -1  -1  23   16.91    5.64
   1   1 -22   95.80    7.89
  -1  -1  22   92.42    9.02
   1   1 -21  596.20   18.03
  -1  -1  21  578.17   15.78
   1   1 -20   46.21    5.64
  -1  -1  20   50.72    5.64
   1   1 -19    1.13    5.64
  -1  -1  19   -2.25    6.76
   1   1 -18   50.72    7.89
  -1  -1  18   60.86    6.76
   1   1 -17  559.01   20.29
  -1  -1  17  557.88   16.91
   1   1 -16    7.89    5.64
  -1  -1  16    5.64    9.02
   1   1 -15   76.64    7.89
  -1  -1  15   85.65   10.14
   1   1 -14   98.05    6.76
  -1  -1  14  110.45   10.14
   1   1 -13 1150.70   48.46
  -1  -1  13 1190.14   43.95
   1   1 -12  173.56   12.40
  -1  -1  12  169.05    9.02
   1   1 -11  122.85    6.76
  -1  -1  11  126.23    7.89
   1   1 -10  105.94    6.76
  -1  -1  10  119.47    5.64
   1   1  -9 5600.21  135.24
  -1  -1   9 5667.83  134.12
  -1  -1   8  285.14    9.02
   1   1  -7 1178.87   47.34
  -1  -1   7 1183.38   30.43
   1   1  -6   64.24    5.64
  -1  -1   6   61.99    3.38
  -1  -1   5 5316.19  129.61
   1   1  -4  116.08    3.38
  -1  -1   4  126.23    4.51
   1   1  -3  458.70   11.27
  -1  -1   3  439.54   11.27
   1   1  -2   46.21    2.25
  -1  -1   2   52.97    2.25
  -1  -1   1 3373.20   86.78
   1   1   0   11.27    2.25
  -1  -1   0   43.95    3.38
   1   1   1 1047.01   45.08
  -1  -1  -3  820.48   28.18
   1   1   4  282.88   11.27
  -1  -1  -4  271.61   10.14
   1   1   5 1798.74   60.86
  -1  -1  -5 1760.42   41.70
   1   1   6   49.59    3.38
  -1  -1  -6   49.59    2.25
   1   1   7 1131.54   38.32
  -1  -1  -7 1128.16   28.18
   1   1   8  170.18    7.89
  -1  -1  -8  164.55    5.64
   1   1   9  428.27   15.78
  -1  -1  -9  389.95   11.27
  -1  -1 -10  213.01    7.89
  -1  -1 -11 1915.95   65.37
   1   1  12  294.15   13.52
  -1  -1 -12  289.65   13.52
   1   1  13  508.29   16.91
  -1  -1 -13  536.47   21.41
   1   1  14    4.51    4.51
  -1  -1 -14    1.13    5.64
   1   1  15  237.80   12.40
  -1  -1 -15  252.45   12.40
   1   1  16   55.22    5.64
  -1  -1 -16   54.10    6.76
   1   1  17  182.58    9.02
  -1  -1 -17  214.14   11.27
   1   1  18    7.89   11.27
  -1  -1 -18   13.52    5.64
   1   1  19  373.05   21.41
  -1  -1 -19  383.19   13.52
   1   1  20  111.58   13.52
  -1  -1 -20   84.53    7.89
   1   1  21  288.52   21.41
  -1  -1 -21  303.17   13.52
   1   1  22    0.00    7.89
  -1  -1 -22    9.02    6.76
   1   1  23  268.23   22.54
  -1  -1 -23  281.76   23.67
   1   1  24   34.94   11.27
  -1  -1 -24   24.79   11.27
  -1  -2  26   36.06   18.03
  -1  -2  25   -1.13   14.65
   1   2 -24   75.51   11.27
  -1  -2  24   86.78   11.27
   1   2 -23  262.60   20.29
  -1  -2  23  282.88   14.65
   1   2 -22   74.38    9.02
  -1  -2  22   68.75    9.02
   1   2 -21   -4.51    5.64
  -1  -2  21    7.89    5.64
   1   2 -20  153.28   10.14
  -1  -2  20  144.26    7.89
   1   2 -19  377.55   12.40
  -1  -2  19  375.30   14.65
   1   2 -18  170.18    9.02
  -1  -2  18  185.96   10.14
   1   2 -17   45.08    6.76
  -1  -2  17   52.97    5.64
   1   2 -16  176.94   11.27
  -1  -2  16  165.67   11.27
   1   2 -15  615.36   25.92
  -1  -2  15  639.03   24.79
   1   2 -14  114.96    6.76
  -1  -2  14  117.21    9.02
   1   2 -13   36.06    7.89
  -1  -2  13   39.45    7.89
  -1  -2  12   50.72    4.51
   1   2 -11 1210.43   32.68
  -1  -2  11 1175.49   31.56
   1   2 -10  966.99   25.92
  -1  -2  10  976.01   27.05
   1   2  -9  374.17   11.27
  -1  -2   9  382.06   11.27
   1   2  -8  191.59    6.76
  -1  -2   8  185.96    9.02
   1   2  -7 3352.91   80.02
  -1  -2   7 3317.97  110.45
   1   2  -6  947.83   25.92
  -1  -2   6  948.96   32.68
   1   2  -5  134.12    4.51
  -1  -2   5  128.48    4.51
   1   2  -4  868.94   18.03
  -1  -2   4  836.26   22.54
   1   2  -3 1459.50   34.94
  -1  -2   3 1353.56   28.18
   1   2  -2   72.13    4.51
  -1  -2   2   77.76    3.38
   1   2  -1   22.54    1.13
  -1  -2   1   22.54    1.13
  -1  -2   0  903.88   23.67
   1   2   1  962.48   27.05
  -1  -2  -2  374.17   19.16
  -1  -2  -4    4.51    2.25
  -1  -2  -5  625.50   22.54
  -1  -2  -6  574.78   21.41
  -1  -2  -7  227.66    9.02
  -1  -2  -8  223.15    6.76
   1   2   9 1405.40   55.22
  -1  -2  -9 1439.22   34.94
   1   2  10 1165.35   31.56
  -1  -2 -10 1159.71   30.43
   1   2  11  235.55   11.27
  -1  -2 -11  235.55    7.89
   1   2  12  154.40    9.02
  -1  -2 -12  149.89    6.76
   1   2  13  477.86   31.56
   1   2  14  657.06   31.56
  -1  -2 -14  686.36   38.32
   1   2  15  300.92   16.91
  -1  -2 -15  293.03   13.52
   1   2  16   22.54    9.02
  -1  -2 -16    4.51    4.51
   1   2  17  280.63   21.41
  -1  -2 -17  273.87   12.40
   1   2  18  716.79   36.06
  -1  -2 -18  760.74   22.54
   1   2  19  110.45   14.65
  -1  -2 -19  105.94    7.89
   1   2  20   24.79   10.14
  -1  -2 -20    4.51    7.89
   1   2  21  208.50   12.40
  -1  -2 -21  198.36   10.14
   1   2  22  213.01   14.65
  -1  -2 -22  224.28   11.27
   1   2  23  207.37   20.29
  -1  -2 -23  196.10   13.52
   1   2  24   11.27   13.52
  -1  -2 -24    5.64   11.27
  -1  -3  26   64.24   11.27
  -1  -3  25   34.94   10.14
  -1  -3  24   81.15    9.02
   1   3 -23   -2.25    9.02
  -1  -3  23   -3.38    5.64
   1   3 -22  330.22   15.78
  -1  -3  22  355.01   16.91
   1   3 -21   93.54    9.02
  -1  -3  21   98.05    9.02
   1   3 -20  227.66   12.40
  -1  -3  20  227.66   10.14
   1   3 -19    4.51    4.51
  -1  -3  19    6.76    6.76
   1   3 -18  317.82   14.65
  -1  -3  18  373.05   14.65
   1   3 -17  252.45   16.91
  -1  -3  17  251.33   10.14
   1   3 -16  190.47   15.78
  -1  -3  16  164.55   10.14
   1   3 -15  139.75    7.89
  -1  -3  15  151.02   10.14
   1   3 -14  170.18    9.02
  -1  -3  14  173.56    7.89
   1   3 -13  453.07   20.29
  -1  -3  13  466.59   14.65
   1   3 -12  480.11   15.78
  -1  -3  12  468.84   14.65
   1   3 -11   71.00    4.51
  -1  -3  11   65.37    4.51
   1   3 -10  336.98   11.27
  -1  -3  10  336.98   15.78
   1   3  -9  488.00   14.65
  -1  -3   9  457.57   18.03
   1   3  -8 1121.39   29.30
  -1  -3   8 1072.93   38.32
   1   3  -7  529.70   21.41
  -1  -3   7  510.54   19.16
   1   3  -6  998.55   36.06
  -1  -3   6  998.55   25.92
   1   3  -5 3323.61   78.89
  -1  -3   5 3094.82   76.64
   1   3  -4 3996.44   94.67
  -1  -3   4 3805.98   91.29
   1   3  -3   67.62    2.25
  -1  -3   3   61.99    2.25
  -1  -3   2  241.18   10.14
   1   3  -1   10.14    1.13
  -1  -3   1   11.27    1.13
  -1  -3   0 1364.83   38.32
   1   3   1   23.67    2.25
  -1  -3  -1   24.79    2.25
   1   3   2  448.56   21.41
  -1  -3  -2  350.51   19.16
   1   3   3 2071.48   94.67
  -1  -3  -3 1560.93   84.53
   1   3   4 1849.45   80.02
   1   3   6  199.48   13.52
  -1  -3  -6  185.96    9.02
   1   3   7  321.20   16.91
  -1  -3  -7  333.60   13.52
   1   3   8 2121.07   83.40
  -1  -3  -8 2090.64   69.88
   1   3   9   94.67    9.02
  -1  -3  -9   94.67    6.76
   1   3  10  307.68   18.03
  -1  -3 -10  288.52   10.14
   1   3  11   72.13   11.27
  -1  -3 -11   82.27    4.51
   1   3  12 1200.29   48.46
  -1  -3 -12 1192.40   31.56
   1   3  13  331.35   22.54
  -1  -3 -13  343.74   12.40
   1   3  14    1.13    5.64
  -1  -3 -14    0.00    3.38
   1   3  15  187.09   15.78
  -1  -3 -15  171.31   10.14
   1   3  16  598.45   30.43
  -1  -3 -16  611.98   20.29
   1   3  17   42.83   11.27
  -1  -3 -17   64.24    9.02
   1   3  18   45.08   12.40
  -1  -3 -18   39.45    5.64
   1   3  19   30.43    7.89
  -1  -3 -19   38.32    6.76
   1   3  20  517.31   28.18
  -1  -3 -20  530.83   23.67
   1   3  21   42.83    7.89
  -1  -3 -21   51.84    7.89
   1   3  22    4.51   10.14
  -1  -3 -22  -10.14    7.89
   1   3  23   50.72   15.78
  -1  -3 -23   46.21   10.14
   1   3  24  327.97   23.67
  -1  -3 -24  289.65   13.52
  -1  -3 -25    7.89    6.76
  -1  -4  25    5.64   14.65
  -1  -4  24  187.09   14.65
   1   4 -23    1.13   10.14
  -1  -4  23    3.38    9.02
   1   4 -22  198.36   11.27
  -1  -4  22  215.26   12.40
   1   4 -21    1.13    6.76
  -1  -4  21   -6.76    5.64
   1   4 -20  397.84   15.78
  -1  -4  20  397.84   15.78
   1   4 -19   10.14    5.64
  -1  -4  19   12.40    6.76
   1   4 -18  344.87   21.41
  -1  -4  18  339.24   14.65
   1   4 -17    4.51    5.64
  -1  -4  17    0.00    4.51
   1   4 -16  284.01   19.16
  -1  -4  16  268.23   12.40
   1   4 -15  103.69   11.27
  -1  -4  15   86.78    6.76
   1   4 -14  578.17   29.30
  -1  -4  14  569.15   18.03
   1   4 -13  -10.14   30.43
  -1  -4  13    9.02    3.38
   1   4 -12  426.02   25.92
  -1  -4  12  477.86   22.54
   1   4 -11   -4.51    3.38
  -1  -4  11   10.14    4.51
   1   4 -10  724.68   31.56
  -1  -4  10  748.35   29.30
   1   4  -9    7.89    4.51
  -1  -4   9   13.52    5.64
   1   4  -8  379.81   16.91
  -1  -4   8  376.43   14.65
   1   4  -7   63.11    6.76
  -1  -4   7   50.72    4.51
   1   4  -6 2114.31   51.84
  -1  -4   6 1873.12   50.72
   1   4  -5   99.18    4.51
  -1  -4   5  102.56    4.51
   1   4  -4  598.45   16.91
  -1  -4   4  595.07   15.78
   1   4  -3  176.94    9.02
  -1  -4   3  188.21    5.64
  -1  -4   2  786.67   21.41
   1   4  -1  313.31   16.91
  -1  -4   1  355.01    7.89
   1   4   0  245.69    9.02
  -1  -4   0  261.47    9.02
   1   4   1   10.14    2.25
  -1  -4  -1   16.91    3.38
  -1  -4  -2 7977.11  201.74
   1   4   3  238.93   13.52
  -1  -4  -3  224.28   12.40
   1   4   4  515.05   25.92
   1   4   5    1.13    3.38
   1   4   6 1722.10   73.26
   1   4   7    1.13    3.38
  -1  -4  -7    7.89    4.51
   1   4   8  717.92   41.70
  -1  -4  -8  870.07   39.45
   1   4   9   43.95    6.76
  -1  -4  -9   45.08    4.51
   1   4  10 1351.31   72.13
  -1  -4 -10 1602.64   55.22
   1   4  11    9.02    5.64
  -1  -4 -11    3.38    3.38
   1   4  12  215.26   18.03
  -1  -4 -12  182.58    7.89
   1   4  13   50.72    9.02
  -1  -4 -13   52.97    4.51
   1   4  14  653.68   33.81
  -1  -4 -14  664.95   19.16
   1   4  15    7.89    6.76
  -1  -4 -15   -1.13    4.51
   1   4  16   28.18   11.27
  -1  -4 -16   28.18    4.51
   1   4  17   13.52    9.02
  -1  -4 -17   12.40    7.89
   1   4  18  601.83   23.67
  -1  -4 -18  586.05   19.16
   1   4  19    1.13   12.40
  -1  -4 -19    2.25    5.64
   1   4  20   13.52   10.14
  -1  -4 -20    6.76   10.14
   1   4  21   -9.02    6.76
  -1  -4 -21    0.00    5.64
   1   4  22  641.28   27.05
  -1  -4 -22  604.09   22.54
   1   4  23   14.65   12.40
  -1  -4 -23    1.13    7.89
   1   4  24    5.64   13.52
  -1  -4 -24   -6.76    7.89
  -1  -4 -25    6.76   13.52
  -1  -5  25   16.91   11.27
  -1  -5  24  108.19   10.14
   1   5 -23    5.64   11.27
  -1  -5  23   14.65    7.89
   1   5 -22  254.71   13.52
  -1  -5  22  255.84   14.65
   1   5 -21  100.31    9.02
  -1  -5  21   92.42    7.89
   1   5 -20  161.17   10.14
  -1  -5  20  166.80   10.14
   1   5 -19   -2.25    3.38
  -1  -5  19    0.00    5.64
   1   5 -18  216.39   11.27
  -1  -5  18  201.74    9.02
   1   5 -17   48.46   10.14
  -1  -5  17   27.05    5.64
   1   5 -16  414.75   23.67
  -1  -5  16  453.07   18.03
   1   5 -15   68.75   10.14
  -1  -5  15   87.91    5.64
   1   5 -14  277.25   11.27
  -1  -5  14  303.17   12.40
   1   5 -13   24.79    3.38
  -1  -5  13   14.65    6.76
   1   5 -12  741.58   34.94
  -1  -5  12  713.41   28.18
   1   5 -11   47.34    6.76
  -1  -5  11   51.84    6.76
   1   5 -10  688.61   30.43
  -1  -5  10  734.82   25.92
   1   5  -9  321.20   16.91
  -1  -5   9  303.17   14.65
   1   5  -8 1254.38   32.68
  -1  -5   8 1240.86   32.68
   1   5  -7  256.96    9.02
  -1  -5   7  234.42    9.02
   1   5  -6  677.34   19.16
  -1  -5   6  641.28   19.16
   1   5  -5    3.38    2.25
   1   5  -4  467.72   14.65
  -1  -5   4  484.62   14.65
   1   5  -3  109.32    6.76
  -1  -5   3  129.61    5.64
  -1  -5   2 3929.95   96.92
   1   5  -1  157.78   10.14
  -1  -5   1  184.83    6.76
  -1  -5   0 2828.84   73.26
   1   5   1   40.57    3.38
  -1  -5  -1   41.70    3.38
   1   5   2 1247.62   45.08
  -1  -5  -2 1168.73   47.34
   1   5   3   38.32    5.64
  -1  -5  -3   46.21    3.38
   1   5   4 2532.43   87.91
  -1  -5  -4 2615.83   94.67
   1   5   5  251.33   13.52
   1   5   6   10.14    4.51
   1   5   7  406.86   20.29
   1   5   8  898.24   39.45
  -1  -5  -8  879.08   37.19
   1   5   9   27.05    6.76
  -1  -5  -9   24.79    4.51
   1   5  10  179.20   14.65
  -1  -5 -10  158.91   10.14
   1   5  11  321.20   22.54
  -1  -5 -11  300.92   14.65
   1   5  12  938.82   41.70
  -1  -5 -12  909.51   33.81
   1   5  13   56.35   10.14
  -1  -5 -13   46.21    5.64
   1   5  14   23.67    7.89
  -1  -5 -14   19.16    4.51
   1   5  15  127.35   13.52
  -1  -5 -15  121.72    5.64
   1   5  16  522.94   28.18
  -1  -5 -16  482.37   13.52
   1   5  17   10.14    7.89
  -1  -5 -17    3.38    4.51
   1   5  18   31.56   13.52
  -1  -5 -18   42.83    5.64
   1   5  19  185.96   15.78
  -1  -5 -19  169.05   11.27
   1   5  20  415.87   20.29
  -1  -5 -20  405.73   16.91
   1   5  21   24.79    7.89
  -1  -5 -21   27.05    6.76
   1   5  22  -10.14   10.14
  -1  -5 -22   13.52    9.02
   1   5  23   56.35   14.65
  -1  -5 -23   37.19   11.27
   1   5  24  346.00   25.92
  -1  -5 -24  293.03   15.78
  -1  -5 -25   -1.13    9.02
  -1  -6  25   12.40   11.27
  -1  -6  24  121.72   12.40
   1   6 -23  158.91   15.78
  -1  -6  23  200.61   13.52
   1   6 -22   89.04   10.14
  -1  -6  22   86.78    9.02
   1   6 -21   16.91    7.89
  -1  -6  21    1.13    6.76
   1   6 -20  148.77   14.65
  -1  -6  20  163.42   11.27
   1   6 -19  271.61   12.40
  -1  -6  19  261.47   10.14
   1   6 -18  258.09   12.40
  -1  -6  18  262.60   10.14
   1   6 -17    6.76    4.51
  -1  -6  17    9.02    4.51
   1   6 -16  244.57   11.27
  -1  -6  16  254.71   11.27
   1   6 -15  588.31   20.29
  -1  -6  15  586.05   19.16
   1   6 -14  480.11   25.92
  -1  -6  14  494.77   23.67
   1   6 -13    3.38    3.38
  -1  -6  13    0.00    5.64
   1   6 -12   67.62    9.02
  -1  -6  12   57.48    6.76
   1   6 -11  623.25   19.16
  -1  -6  11  604.09   24.79
   1   6 -10  155.53    7.89
  -1  -6  10  152.15   10.14
   1   6  -9  597.33   18.03
  -1  -6   9  577.04   21.41
   1   6  -8  471.10   14.65
  -1  -6   8  442.92   11.27
   1   6  -7  776.52   21.41
  -1  -6   7  735.95   19.16
   1   6  -6  799.06   21.41
  -1  -6   6  750.60   23.67
   1   6  -5   59.73    4.51
  -1  -6   5   50.72    5.64
  -1  -6   4  835.13   23.67
  -1  -6   3  374.17   11.27
  -1  -6   2  376.43   12.40
   1   6  -1  359.52   20.29
  -1  -6   1  440.67   12.40
  -1  -6   0  910.64   20.29
   1   6   2  533.08   21.41
  -1  -6  -2  503.78   16.91
   1   6   3 1037.99   39.45
  -1  -6  -3  970.37   30.43
   1   6   4 1544.03   52.97
   1   6   5 1618.41   57.48
  -1  -6  -5 1657.86   63.11
   1   6   6  440.67   20.29
  -1  -6  -6  444.05   21.41
   1   6   7   56.35    7.89
   1   6   8  123.97   11.27
  -1  -6  -8  116.08    6.76
   1   6   9  812.59   34.94
  -1  -6  -9  779.90   30.43
   1   6  10  555.63   29.30
  -1  -6 -10  524.07   21.41
   1   6  11   75.51   10.14
  -1  -6 -11   80.02    7.89
   1   6  12   64.24    9.02
  -1  -6 -12   83.40   10.14
   1   6  13  469.97   23.67
  -1  -6 -13  478.99   15.78
   1   6  14  313.31   18.03
  -1  -6 -14  307.68   10.14
   1   6  15  225.41   16.91
  -1  -6 -15  219.77    9.02
   1   6  16  111.58   14.65
  -1  -6 -16   94.67    6.76
   1   6  17  369.67   20.29
  -1  -6 -17  376.43   12.40
   1   6  18  205.12   13.52
  -1  -6 -18  216.39    9.02
   1   6  19   34.94   10.14
  -1  -6 -19   36.06    5.64
   1   6  20    2.25    9.02
  -1  -6 -20   10.14    5.64
   1   6  21  240.06   14.65
  -1  -6 -21  240.06   11.27
   1   6  22  191.59   13.52
  -1  -6 -22  234.42   14.65
   1   6  23  125.10   16.91
  -1  -6 -23   93.54    9.02
  -1  -6 -24   -4.51   10.14
  -1  -7  25  193.85   23.67
  -1  -7  24   28.18    9.02
   1   7 -23   21.41   11.27
  -1  -7  23   11.27    7.89
   1   7 -22   72.13   12.40
  -1  -7  22   47.34   10.14
   1   7 -21  555.63   20.29
  -1  -7  21  559.01   21.41
   1   7 -20   22.54    9.02
  -1  -7  20   29.30    5.64
   1   7 -19   14.65    6.76
  -1  -7  19   14.65    5.64
   1   7 -18  113.83    7.89
  -1  -7  18  108.19    7.89
   1   7 -17  620.99   20.29
  -1  -7  17  627.76   16.91
   1   7 -16   98.05    7.89
  -1  -7  16   96.92    6.76
   1   7 -15    2.25    4.51
  -1  -7  15    1.13    5.64
   1   7 -14  259.22   11.27
  -1  -7  14  276.12   15.78
   1   7 -13 1143.93   33.81
  -1  -7  13 1136.05   41.70
   1   7 -12   46.21    5.64
  -1  -7  12   39.45    5.64
   1   7 -11   -3.38    3.38
  -1  -7  11   -1.13    6.76
   1   7 -10  110.45    7.89
  -1  -7  10  120.59    7.89
   1   7  -9 1936.24   50.72
  -1  -7   9 1891.15   51.84
   1   7  -8   42.83    4.51
  -1  -7   8   49.59    4.51
   1   7  -7  235.55    9.02
  -1  -7   7  234.42   10.14
   1   7  -6    0.00    3.38
  -1  -7   6   -2.25    4.51
   1   7  -5 1393.01   54.10
  -1  -7   5 1318.62   30.43
   1   7  -4  324.58   16.91
  -1  -7   4  340.36   11.27
  -1  -7   3   30.43    4.51
  -1  -7   2  387.70   15.78
   1   7  -1 2088.38  104.81
  -1  -7   1 3161.32   76.64
   1   7   0   20.29    3.38
  -1  -7   0   18.03    3.38
   1   7   1   83.40    6.76
  -1  -7  -1   73.26    6.76
   1   7   2  250.20   13.52
  -1  -7  -2  224.28    9.02
   1   7   3 3026.07  104.81
   1   7   4   45.08    4.51
  -1  -7  -4   51.84    5.64
   1   7   5 1072.93   41.70
  -1  -7  -5 1092.09   45.08
   1   7   6  191.59   11.27
  -1  -7  -6  174.69   12.40
   1   7   7  538.72   23.67
  -1  -7  -7  535.34   24.79
   1   7   8  164.55   11.27
   1   7   9    2.25    7.89
  -1  -7  -9   18.03    6.76
   1   7  10   91.29   10.14
  -1  -7 -10   83.40    7.89
   1   7  11 1371.59   58.61
  -1  -7 -11 1397.52   51.84
   1   7  12   11.27    9.02
  -1  -7 -12   12.40    5.64
   1   7  13  410.24   20.29
  -1  -7 -13  412.49   14.65
   1   7  14  187.09   14.65
  -1  -7 -14  184.83    9.02
   1   7  15  297.54   20.29
  -1  -7 -15  308.81   10.14
   1   7  16  132.99   15.78
  -1  -7 -16  142.01    7.89
   1   7  17  101.43   10.14
  -1  -7 -17  114.96    6.76
   1   7  18   -6.76    6.76
  -1  -7 -18   -2.25    5.64
   1   7  19  446.30   25.92
  -1  -7 -19  417.00   13.52
   1   7  20   40.57    7.89
  -1  -7 -20   52.97    5.64
   1   7  21  103.69   12.40
  -1  -7 -21   87.91   10.14
   1   7  22   -4.51    9.02
  -1  -7 -22   -3.38    7.89
   1   7  23  232.17   22.54
  -1  -7 -23  277.25   15.78
  -1  -7 -24   52.97    9.02
  -1  -8  25    1.13   14.65
  -1  -8  24   -2.25    9.02
  -1  -8  23  342.62   16.91
   1   8 -22    6.76   10.14
  -1  -8  22   -4.51    9.02
   1   8 -21    5.64    7.89
  -1  -8  21   15.78    7.89
   1   8 -20   -3.38    5.64
  -1  -8  20    5.64    4.51
   1   8 -19  867.81   27.05
  -1  -8  19  881.34   23.67
   1   8 -18   30.43    7.89
  -1  -8  18   27.05    5.64
   1   8 -17    4.51    6.76
  -1  -8  17    1.13    4.51
   1   8 -16   11.27    6.76
  -1  -8  16    3.38    5.64
   1   8 -15 1219.45   36.06
  -1  -8  15 1262.27   31.56
   1   8 -14   24.79    4.51
  -1  -8  14   16.91    5.64
   1   8 -13    3.38    3.38
  -1  -8  13  -10.14    7.89
   1   8 -12   12.40    7.89
  -1  -8  12   13.52    9.02
   1   8 -11  966.99   30.43
  -1  -8  11  987.28   39.45
   1   8 -10   -1.13    3.38
  -1  -8  10   -2.25    5.64
   1   8  -9    6.76    3.38
  -1  -8   9    7.89    3.38
   1   8  -8   -2.25    3.38
  -1  -8   8    3.38    3.38
   1   8  -7 3729.34   96.92
  -1  -8   7 3365.31   93.54
   1   8  -6    9.02    3.38
  -1  -8   6   10.14    2.25
   1   8  -5  136.37   10.14
  -1  -8   5  127.35    5.64
   1   8  -4   30.43    4.51
  -1  -8   4   28.18    4.51
  -1  -8   3 1989.21   47.34
  -1  -8   2   45.08    4.51
   1   8  -1  125.10    9.02
  -1  -8   1  142.01    6.76
   1   8   0  169.05   21.41
  -1  -8   0  166.80    6.76
   1   8   1 2447.91  178.07
  -1  -8  -1 1469.65   54.10
   1   8   2   31.56    5.64
  -1  -8  -2   31.56    5.64
   1   8   3   66.49    6.76
  -1  -8  -3   76.64    5.64
   1   8   4  193.85   11.27
  -1  -8  -4  216.39   13.52
   1   8   5 2481.72   92.42
  -1  -8  -5 2300.27   67.62
   1   8   6   36.06    7.89
  -1  -8  -6   31.56    7.89
   1   8   7  303.17   15.78
  -1  -8  -7  314.44   16.91
   1   8   8    0.00    7.89
  -1  -8  -8    3.38    4.51
   1   8   9 1500.08   57.48
  -1  -8  -9 1495.57   63.11
   1   8  10   21.41    6.76
  -1  -8 -10   21.41    4.51
   1   8  11  415.87   22.54
  -1  -8 -11  405.73   15.78
   1   8  12   19.16   10.14
  -1  -8 -12   25.92    5.64
   1   8  13  557.88   28.18
  -1  -8 -13  588.31   19.16
   1   8  14   15.78    5.64
  -1  -8 -14   14.65    6.76
   1   8  15   86.78    7.89
  -1  -8 -15   94.67    7.89
   1   8  16   20.29    7.89
  -1  -8 -16   13.52    4.51
   1   8  17  422.64   18.03
  -1  -8 -17  421.51   13.52
   1   8  18   12.40    6.76
  -1  -8 -18   -1.13    5.64
   1   8  19  147.64   11.27
  -1  -8 -19  170.18    9.02
   1   8  20   -4.51    9.02
  -1  -8 -20   -6.76    5.64
   1   8  21  280.63   15.78
  -1  -8 -21  269.36   12.40
   1   8  22   11.27    9.02
  -1  -8 -22  -13.52   10.14
   1   8  23  130.74   16.91
  -1  -8 -23  114.96   10.14
  -1  -8 -24    9.02   10.14
  -1  -9  24    9.02    9.02
  -1  -9  23    5.64   11.27
   1   9 -22   38.32   11.27
  -1  -9  22   60.86    9.02
   1   9 -21  519.56   19.16
  -1  -9  21  556.75   22.54
   1   9 -20   52.97    7.89
  -1  -9  20   48.46    7.89
   1   9 -19    3.38    5.64
  -1  -9  19   -2.25    5.64
   1   9 -18   18.03    7.89
  -1  -9  18   12.40    6.76
   1   9 -17  835.13   25.92
  -1  -9  17  826.11   25.92
   1   9 -16  121.72    7.89
  -1  -9  16  122.85   10.14
   1   9 -15    6.76    5.64
  -1  -9  15   11.27    4.51
   1   9 -14   -3.38    5.64
  -1  -9  14   -1.13    6.76
   1   9 -13 1350.18   41.70
  -1  -9  13 1402.02   45.08
   1   9 -12   37.19    5.64
  -1  -9  12   50.72    9.02
   1   9 -11   13.52    4.51
  -1  -9  11   18.03    6.76
   1   9 -10  114.96    7.89
  -1  -9  10  120.59    6.76
   1   9  -9 1285.94   39.45
  -1  -9   9 1081.95   34.94
   1   9  -8  476.73   16.91
  -1  -9   8  488.00   18.03
   1   9  -7   -6.76    3.38
  -1  -9   7    2.25    2.25
   1   9  -6   36.06    5.64
  -1  -9   6   36.06    4.51
   1   9  -5 1979.06   81.15
  -1  -9   5 1968.92   45.08
   1   9  -4   89.04    9.02
  -1  -9   4   94.67    5.64
  -1  -9   3  109.32    6.76
  -1  -9   2  271.61   10.14
   1   9  -1  625.50   37.19
  -1  -9   1  843.02   23.67
   1   9   0  200.61   13.52
  -1  -9   0  208.50   10.14
   1   9   1   76.64    7.89
  -1  -9  -1   90.16    5.64
   1   9   2   -5.64    2.25
  -1  -9  -2   -1.13    2.25
   1   9   3 1115.76   43.95
  -1  -9  -3 1110.12   45.08
   1   9   4  663.82   30.43
  -1  -9  -4  611.98   20.29
   1   9   5   84.53   10.14
  -1  -9  -5   84.53    9.02
   1   9   6   11.27    9.02
  -1  -9  -6  -13.52    5.64
   1   9   7  566.90   27.05
  -1  -9  -7  606.34   28.18
   1   9   8   68.75   16.91
  -1  -9  -8   63.11   10.14
   1   9   9   73.26   10.14
  -1  -9  -9   99.18   13.52
   1   9  10    1.13    5.64
  -1  -9 -10    2.25    5.64
   1   9  11  901.62   39.45
  -1  -9 -11  891.48   28.18
   1   9  12  278.38   36.06
  -1  -9 -12  330.22   13.52
   1   9  13  166.80   10.14
  -1  -9 -13  171.31    9.02
   1   9  14   14.65    5.64
  -1  -9 -14    9.02    5.64
   1   9  15  619.87   27.05
  -1  -9 -15  659.31   21.41
   1   9  16   41.70    9.02
  -1  -9 -16   46.21    7.89
   1   9  17  240.06   14.65
  -1  -9 -17  232.17   10.14
   1   9  18   10.14   14.65
  -1  -9 -18   -4.51    6.76
   1   9  19  336.98   15.78
  -1  -9 -19  327.97   12.40
   1   9  20   56.35   11.27
  -1  -9 -20   67.62    6.76
   1   9  21  174.69   15.78
  -1  -9 -21  149.89   12.40
   1   9  22    7.89   10.14
  -1  -9 -22    2.25    7.89
   1   9  23  191.59   21.41
  -1  -9 -23  155.53   13.52
  -1  -9 -24   46.21   10.14
  -1 -10  24   78.89   12.40
  -1 -10  23  194.98   14.65
   1  10 -22   38.32   11.27
  -1 -10  22   28.18   11.27
   1  10 -21   -6.76   10.14
  -1 -10  21   -1.13    7.89
   1  10 -20  119.47   10.14
  -1 -10  20  137.50   10.14
   1  10 -19  344.87   14.65
  -1 -10  19  336.98   11.27
   1  10 -18  140.88   10.14
  -1 -10  18  146.51    9.02
   1  10 -17   -7.89    4.51
  -1 -10  17  -14.65    7.89
   1  10 -16  126.23   10.14
  -1 -10  16  138.62    7.89
   1  10 -15  553.37   19.16
  -1 -10  15  554.50   15.78
   1  10 -14  203.99   10.14
  -1 -10  14  191.59    9.02
   1  10 -13   19.16    6.76
  -1 -10  13   20.29    4.51
   1  10 -12   78.89    6.76
  -1 -10  12   76.64    9.02
   1  10 -11  613.10   20.29
  -1 -10  11  601.83   20.29
   1  10 -10  334.73   12.40
  -1 -10  10  336.98   13.52
   1  10  -9  156.66    9.02
  -1 -10   9  153.28    9.02
   1  10  -8  273.87   11.27
  -1 -10   8  260.34    9.02
   1  10  -7 1300.59   48.46
  -1 -10   7 1216.06   34.94
   1  10  -6 1282.56   51.84
  -1 -10   6 1226.21   32.68
   1  10  -5   37.19    6.76
  -1 -10   5   49.59    4.51
   1  10  -4  289.65   15.78
  -1 -10   4  312.19   11.27
   1  10  -3 1977.94   85.65
  -1 -10   3 2042.18   51.84
  -1 -10   2 1116.89   32.68
  -1 -10   1  116.08    6.76
  -1 -10   0   76.64    6.76
   1  10   1  664.95   32.68
  -1 -10  -1  724.68   21.41
   1  10   2 1101.11   54.10
  -1 -10  -2 1265.65   34.94
   1  10   3   31.56    7.89
  -1 -10  -3   46.21    7.89
   1  10   4  224.28   13.52
  -1 -10  -4  238.93   15.78
   1  10   5  368.54   14.65
  -1 -10  -5  352.76   20.29
   1  10   6  506.04   23.67
  -1 -10  -6  624.37   34.94
   1  10   7   87.91    9.02
  -1 -10  -7  102.56   12.40
   1  10   8  -36.06   31.56
  -1 -10  -8   -4.51    7.89
   1  10   9  398.97   16.91
  -1 -10  -9  394.46   21.41
   1  10  10  867.81   29.30
  -1 -10 -10  935.43   45.08
   1  10  11   90.16    9.02
  -1 -10 -11   96.92    7.89
   1  10  12   73.26    6.76
  -1 -10 -12   77.76    7.89
   1  10  13  336.98   14.65
  -1 -10 -13  327.97   14.65
   1  10  14  484.62   18.03
  -1 -10 -14  435.03   18.03
   1  10  15  152.15   11.27
  -1 -10 -15  126.23   10.14
   1  10  16   -7.89    7.89
  -1 -10 -16    0.00    4.51
   1  10  17  218.64   13.52
  -1 -10 -17  222.02   12.40
   1  10  18  200.61   13.52
  -1 -10 -18  190.47    9.02
   1  10  19  146.51   12.40
  -1 -10 -19  137.50    7.89
   1  10  20    6.76   10.14
  -1 -10 -20    2.25    7.89
   1  10  21  111.58   16.91
  -1 -10 -21   67.62   10.14
   1  10  22  164.55   16.91
  -1 -10 -22  179.20   12.40
  -1 -10 -23  111.58   11.27
  -1 -11  24  129.61   21.41
  -1 -11  23   13.52   11.27
   1  11 -22  155.53   15.78
  -1 -11  22  174.69   13.52
   1  11 -21  107.07   12.40
  -1 -11  21   90.16   10.14
   1  11 -20  187.09   12.40
  -1 -11  20  167.93   19.16
   1  11 -19   -5.64    5.64
  -1 -11  19    0.00   12.40
   1  11 -18  238.93   12.40
  -1 -11  18  224.28   12.40
   1  11 -17  182.58   11.27
  -1 -11  17  184.83   11.27
   1  11 -16  374.17   14.65
  -1 -11  16  371.92   15.78
   1  11 -15    4.51    6.76
  -1 -11  15  -14.65    9.02
   1  11 -14  309.93   13.52
  -1 -11  14  300.92   11.27
   1  11 -13  309.93   13.52
  -1 -11  13  307.68   11.27
   1  11 -12  522.94   19.16
  -1 -11  12  516.18   15.78
   1  11 -11   27.05    6.76
  -1 -11  11   28.18    5.64
   1  11 -10  395.59   15.78
  -1 -11  10  383.19   13.52
   1  11  -9  132.99   10.14
  -1 -11   9  142.01    7.89
   1  11  -8 1114.63   45.08
  -1 -11   8 1157.46   31.56
   1  11  -7   30.43    7.89
  -1 -11   7   23.67    5.64
   1  11  -6  109.32   10.14
  -1 -11   6  108.19    6.76
  -1 -11   5  662.69   18.03
   1  11  -4 1269.03   54.10
  -1 -11   4 1274.67   32.68
  -1 -11   3  199.48    9.02
  -1 -11   2  570.28   15.78
  -1 -11   1  456.45   18.03
  -1 -11   0  706.65   23.67
  -1 -11  -1    0.00    3.38
  -1 -11  -2  157.78    9.02
  -1 -11  -3  145.39   14.65
   1  11   4 1236.35   50.72
  -1 -11  -4 1199.16   49.59
   1  11   5   23.67    6.76
  -1 -11  -5   30.43    6.76
   1  11   6    3.38    3.38
  -1 -11  -6   15.78    7.89
   1  11   7  203.99   10.14
  -1 -11  -7  202.87   11.27
   1  11   8 1457.25   43.95
  -1 -11  -8 1464.01   43.95
   1  11   9  169.05   11.27
  -1 -11  -9  155.53   10.14
   1  11  10   93.54   12.40
  -1 -11 -10   63.11    6.76
   1  11  11    1.13    6.76
  -1 -11 -11   13.52    6.76
   1  11  12 1210.43   36.06
  -1 -11 -12 1210.43   30.43
   1  11  13   28.18    7.89
  -1 -11 -13   20.29    6.76
   1  11  14   84.53    9.02
  -1 -11 -14   96.92    6.76
   1  11  15   28.18    7.89
  -1 -11 -15   20.29    5.64
   1  11  16  667.20   23.67
  -1 -11 -16  639.03   19.16
   1  11  17  126.23   12.40
  -1 -11 -17  109.32    9.02
   1  11  18   -2.25   10.14
  -1 -11 -18   -2.25    6.76
   1  11  19   45.08    9.02
  -1 -11 -19   54.10    9.02
   1  11  20  307.68   21.41
  -1 -11 -20  298.66   15.78
   1  11  21   95.80   16.91
  -1 -11 -21   54.10    9.02
   1  11  22   -1.13   10.14
  -1 -11 -22    4.51    9.02
  -1 -11 -23   15.78   12.40
  -1 -12  23    1.13    9.02
  -1 -12  22  268.23   16.91
   1  12 -21   -5.64    7.89
  -1 -12  21    5.64    6.76
   1  12 -20  294.15   15.78
  -1 -12  20  307.68   23.67
   1  12 -19    0.00    9.02
  -1 -12  19   -2.25   10.14
   1  12 -18  258.09   13.52
  -1 -12  18  261.47   15.78
   1  12 -17   10.14   13.52
  -1 -12  17   -1.13    5.64
   1  12 -16  371.92   16.91
  -1 -12  16  393.33   13.52
   1  12 -15    0.00    6.76
  -1 -12  15   32.68    6.76
   1  12 -14  396.71   15.78
  -1 -12  14  426.02   13.52
   1  12 -13   16.91    5.64
  -1 -12  13   23.67    5.64
   1  12 -12  557.88   19.16
  -1 -12  12  524.07   13.52
   1  12 -11  130.74   10.14
  -1 -12  11  145.39    6.76
   1  12 -10  800.19   34.94
  -1 -12  10  758.49   20.29
   1  12  -9    4.51    7.89
  -1 -12   9   -3.38    4.51
   1  12  -8  431.65   36.06
  -1 -12   8  450.81   13.52
   1  12  -7  103.69   10.14
  -1 -12   7  114.96    6.76
   1  12  -6 1622.92   64.24
  -1 -12   6 1571.08   36.06
  -1 -12   5   27.05    5.64
   1  12  -4  285.14   16.91
  -1 -12   4  273.87   12.40
  -1 -12   3   60.86    5.64
  -1 -12   2 1450.49   48.46
  -1 -12   1   57.48    4.51
  -1 -12   0  240.06   10.14
  -1 -12  -1   22.54    4.51
   1  12   2 1218.32   54.10
  -1 -12  -2 1239.73   31.56
   1  12   3   47.34    7.89
  -1 -12  -3   37.19    7.89
  -1 -12  -4  191.59   19.16
   1  12   5    1.13    4.51
  -1 -12  -5    3.38    4.51
   1  12   6 1015.45   32.68
  -1 -12  -6  953.47   34.94
   1  12   7   42.83    7.89
  -1 -12  -7   41.70    5.64
   1  12   8   20.29    5.64
  -1 -12  -8    9.02    7.89
   1  12   9   27.05    5.64
  -1 -12  -9   12.40    7.89
   1  12  10 1493.31   42.83
  -1 -12 -10 1461.76   41.70
   1  12  11    1.13    6.76
  -1 -12 -11   19.16    5.64
   1  12  12  149.89   12.40
  -1 -12 -12  153.28    9.02
   1  12  13   -2.25    6.76
  -1 -12 -13    0.00    6.76
   1  12  14  872.32   28.18
  -1 -12 -14  871.19   22.54
   1  12  15   18.03    7.89
  -1 -12 -15   27.05    7.89
   1  12  16   11.27    7.89
  -1 -12 -16   15.78    6.76
   1  12  17   -2.25    9.02
  -1 -12 -17   11.27    6.76
   1  12  18  483.50   21.41
  -1 -12 -18  419.25   15.78
   1  12  19   28.18   13.52
  -1 -12 -19   -9.02   10.14
   1  12  20    3.38   10.14
  -1 -12 -20   -3.38    6.76
   1  12  21  -18.03   14.65
  -1 -12 -21    4.51   11.27
   1  12  22  335.85   25.92
  -1 -12 -22  300.92   15.78
  -1 -12 -23  -33.81   19.16
  -1 -13  23    2.25    9.02
  -1 -13  22  193.85   16.91
   1  13 -21   47.34   14.65
  -1 -13  21   52.97   10.14
   1  13 -20  323.46   22.54
  -1 -13  20  268.23   18.03
   1  13 -19  -14.65   10.14
  -1 -13  19   -2.25    7.89
   1  13 -18  288.52   15.78
  -1 -13  18  276.12   14.65
   1  13 -17    9.02   13.52
  -1 -13  17   12.40    7.89
   1  13 -16  273.87   14.65
  -1 -13  16  249.07    9.02
   1  13 -15   16.91    5.64
  -1 -13  15   15.78    5.64
   1  13 -14  291.90   13.52
  -1 -13  14  271.61    9.02
   1  13 -13   16.91   11.27
  -1 -13  13   14.65    5.64
   1  13 -12  659.31   30.43
  -1 -13  12  611.98   14.65
   1  13 -11   -4.51    6.76
  -1 -13  11   -5.64    5.64
   1  13 -10  199.48   14.65
  -1 -13  10  214.14   10.14
   1  13  -9   13.52    9.02
  -1 -13   9   28.18    5.64
   1  13  -8  504.91   30.43
  -1 -13   8  521.81   14.65
   1  13  -7  111.58   11.27
  -1 -13   7  116.08    7.89
   1  13  -6  564.64   27.05
  -1 -13   6  540.97   14.65
  -1 -13   5   85.65    7.89
  -1 -13   4 1223.95   34.94
  -1 -13   3   16.91    5.64
  -1 -13   2  240.06    9.02
  -1 -13   1   82.27    6.76
   1  13   0 1072.93   47.34
  -1 -13   0 1069.55   33.81
  -1 -13  -1   36.06    4.51
   1  13   2  734.82   32.68
  -1 -13  -2  692.00   19.16
  -1 -13  -3   33.81    5.64
   1  13   4  646.91   30.43
  -1 -13  -4  611.98   18.03
   1  13   5  199.48   16.91
  -1 -13  -5  202.87    9.02
   1  13   6  341.49   14.65
  -1 -13  -6  320.08   12.40
   1  13   7   24.79   11.27
  -1 -13  -7   49.59    7.89
   1  13   8 1307.35   41.70
  -1 -13  -8 1258.89   42.83
   1  13   9   -9.02    6.76
  -1 -13  -9   -7.89    6.76
   1  13  10  306.55   14.65
  -1 -13 -10  309.93   14.65
   1  13  11  120.59   10.14
  -1 -13 -11   94.67    9.02
   1  13  12  553.37   22.54
  -1 -13 -12  559.01   20.29
   1  13  13   -9.02    7.89
  -1 -13 -13   11.27    6.76
   1  13  14   16.91    6.76
  -1 -13 -14    2.25    6.76
   1  13  15   98.05   14.65
  -1 -13 -15  110.45    7.89
   1  13  16  546.61   21.41
  -1 -13 -16  535.34   18.03
   1  13  17   -6.76    9.02
  -1 -13 -17   -6.76    7.89
   1  13  18  -15.78   16.91
  -1 -13 -18    7.89   11.27
   1  13  19    3.38   13.52
  -1 -13 -19   -7.89   13.52
   1  13  20  393.33   27.05
  -1 -13 -20  358.40   20.29
   1  13  21    4.51   11.27
  -1 -13 -21    3.38   10.14
  -1 -13 -22   -1.13   11.27
  -1 -14  22  114.96   13.52
   1  14 -21   13.52   10.14
  -1 -14  21   41.70   19.16
   1  14 -20  113.83   13.52
  -1 -14  20  107.07   16.91
   1  14 -19  193.85   14.65
  -1 -14  19  171.31   22.54
   1  14 -18  169.05   14.65
  -1 -14  18  164.55   11.27
   1  14 -17   31.56    9.02
  -1 -14  17   19.16    7.89
   1  14 -16  357.27   21.41
  -1 -14  16  315.57   12.40
   1  14 -15  182.58   16.91
  -1 -14  15  169.05    7.89
   1  14 -14  275.00   20.29
  -1 -14  14  289.65   11.27
   1  14 -13   23.67    9.02
  -1 -14  13   30.43    5.64
   1  14 -12  259.22   16.91
  -1 -14  12  263.72    9.02
   1  14 -11  259.22   19.16
  -1 -14  11  214.14   10.14
   1  14 -10  256.96   24.79
  -1 -14  10  287.39   11.27
   1  14  -9  -10.14    6.76
  -1 -14   9   -3.38    4.51
   1  14  -8  652.55   30.43
  -1 -14   8  635.64   18.03
   1  14  -7  670.58   32.68
  -1 -14   7  626.63   20.29
   1  14  -6  733.70   34.94
  -1 -14   6  715.66   19.16
  -1 -14   5   -1.13    4.51
  -1 -14   4  265.98    9.02
  -1 -14   3  364.03   11.27
  -1 -14   2  386.57   22.54
  -1 -14   1   21.41    4.51
  -1 -14   0  302.04   11.27
   1  14   1  255.84   20.29
  -1 -14  -1  217.52   10.14
   1  14   2 1027.85   45.08
  -1 -14  -2  963.61   25.92
  -1 -14  -3   15.78    5.64
   1  14   4  110.45   18.03
  -1 -14  -4  134.12    7.89
   1  14   5   47.34   10.14
  -1 -14  -5   56.35    6.76
   1  14   6  902.75   39.45
  -1 -14  -6  809.21   22.54
   1  14   7  155.53   10.14
  -1 -14  -7  169.05    9.02
   1  14   8    3.38    5.64
  -1 -14  -8   -1.13    6.76
   1  14   9  220.90   12.40
  -1 -14  -9  214.14   12.40
   1  14  10  261.47   14.65
  -1 -14 -10  258.09   13.52
   1  14  11   14.65    6.76
  -1 -14 -11   18.03    7.89
   1  14  12   73.26   11.27
  -1 -14 -12   52.97   10.14
   1  14  13  139.75   11.27
  -1 -14 -13  132.99   10.14
   1  14  14  240.06   16.91
  -1 -14 -14  275.00   12.40
   1  14  15    9.02   10.14
  -1 -14 -15   18.03    6.76
   1  14  16   12.40    9.02
  -1 -14 -16    2.25    6.76
   1  14  17   66.49   16.91
  -1 -14 -17  129.61   13.52
   1  14  18  198.36   31.56
  -1 -14 -18  291.90   19.16
   1  14  19   28.18   11.27
  -1 -14 -19    5.64   18.03
   1  14  20    5.64   14.65
  -1 -14 -20    4.51   12.40
   1  14  21   42.83   18.03
  -1 -14 -21   61.99   12.40
  -1 -14 -22   81.15   19.16
  -1 -15  22   27.05   20.29
  -1 -15  21  293.03   25.92
   1  15 -20   61.99   15.78
  -1 -15  20   59.73   14.65
   1  15 -19   51.84   14.65
  -1 -15  19   38.32   21.41
   1  15 -18   55.22   14.65
  -1 -15  18   46.21   12.40
   1  15 -17  402.35   25.92
  -1 -15  17  351.63   14.65
   1  15 -16  143.13   15.78
  -1 -15  16  123.97   10.14
   1  15 -15    7.89    9.02
  -1 -15  15   -1.13    7.89
   1  15 -14  148.77   14.65
  -1 -15  14  151.02    9.02
   1  15 -13  332.47   22.54
  -1 -15  13  299.79   10.14
   1  15 -12  121.72   13.52
  -1 -15  12  131.86    9.02
   1  15 -11  -25.92   11.27
  -1 -15  11   12.40    5.64
  -1 -15  10   43.95    6.76
   1  15  -9  388.82   22.54
  -1 -15   9  393.33   13.52
   1  15  -8  100.31   12.40
  -1 -15   8  107.07    9.02
   1  15  -7    6.76    6.76
  -1 -15   7   -3.38    5.64
   1  15  -6  263.72   18.03
  -1 -15   6  265.98    9.02
  -1 -15   5  527.45   14.65
  -1 -15   4  287.39    9.02
  -1 -15   3   82.27    6.76
  -1 -15   2   42.83    4.51
  -1 -15   1  657.06   19.16
  -1 -15   0  196.10    7.89
  -1 -15  -1   12.40    5.64
   1  15   2   90.16   11.27
  -1 -15  -2   98.05    9.02
   1  15   3  563.51   30.43
  -1 -15  -3  518.43   20.29
  -1 -15  -4  383.19   12.40
  -1 -15  -5   29.30    6.76
   1  15   6  140.88   14.65
  -1 -15  -6  140.88    9.02
   1  15   7  570.28   30.43
  -1 -15  -7  535.34   16.91
   1  15   8  170.18   18.03
  -1 -15  -8  137.50    9.02
   1  15   9   84.53   13.52
  -1 -15  -9   77.76    7.89
   1  15  10    0.00    6.76
  -1 -15 -10   12.40    9.02
   1  15  11  473.35   20.29
  -1 -15 -11  474.48   21.41
   1  15  12   22.54    7.89
  -1 -15 -12    9.02   10.14
   1  15  13   45.08   11.27
  -1 -15 -13   66.49    9.02
   1  15  14   -3.38    6.76
  -1 -15 -14   -2.25    5.64
   1  15  15  276.12   20.29
  -1 -15 -15  227.66   16.91
   1  15  16  110.45   16.91
  -1 -15 -16  145.39   14.65
   1  15  17   86.78   16.91
  -1 -15 -17   48.46   14.65
   1  15  18  -34.94   13.52
  -1 -15 -18   25.92   14.65
   1  15  19  165.67   20.29
  -1 -15 -19  118.34   23.67
   1  15  20   75.51   14.65
  -1 -15 -20   95.80   19.16
   1  15  21   96.92   14.65
  -1 -15 -21   90.16   23.67
  -1 -16  21   -1.13   13.52
   1  16 -20   14.65   10.14
  -1 -16  20    3.38   19.16
   1  16 -19  405.73   24.79
  -1 -16  19  406.86   28.18
   1  16 -18    0.00   10.14
  -1 -16  18   -4.51   12.40
   1  16 -17   32.68   10.14
  -1 -16  17    5.64   10.14
   1  16 -16   -1.13    9.02
  -1 -16  16   -1.13   11.27
   1  16 -15  495.89   25.92
  -1 -16  15  509.42   18.03
   1  16 -14   31.56   13.52
  -1 -16  14    6.76    9.02
  -1 -16  13    1.13    5.64
  -1 -16  12    9.02    7.89
   1  16 -11  661.57   32.68
  -1 -16  11  670.58   20.29
   1  16 -10   38.32   10.14
  -1 -16  10   30.43    7.89
  -1 -16   9    0.00    5.64
   1  16  -8   45.08   10.14
  -1 -16   8   32.68    6.76
   1  16  -7  740.46   34.94
  -1 -16   7  755.11   18.03
  -1 -16   6    1.13    4.51
  -1 -16   5    1.13    4.51
  -1 -16   4   50.72    6.76
  -1 -16   3  501.53   15.78
  -1 -16   2    4.51    4.51
  -1 -16   1   14.65    4.51
  -1 -16   0   18.03    4.51
  -1 -16  -1  954.59   21.41
   1  16   2   77.76   11.27
  -1 -16  -2   77.76    5.64
   1  16   3   84.53   12.40
  -1 -16  -3   94.67    7.89
  -1 -16  -4    3.38    5.64
  -1 -16  -5  473.35   15.78
   1  16   6  -11.27   12.40
  -1 -16  -6   -7.89    5.64
   1  16   7  279.50   21.41
  -1 -16  -7  256.96   11.27
   1  16   8   61.99   11.27
  -1 -16  -8   43.95    6.76
   1  16   9  554.50   27.05
  -1 -16  -9  520.69   18.03
   1  16  10   11.27   12.40
  -1 -16 -10   -1.13    5.64
   1  16  11   52.97   15.78
  -1 -16 -11   58.61    9.02
   1  16  12   -3.38    9.02
  -1 -16 -12   24.79    6.76
   1  16  13  483.50   27.05
  -1 -16 -13  396.71   15.78
   1  16  14    7.89   12.40
  -1 -16 -14   19.16    9.02
   1  16  15   60.86   16.91
  -1 -16 -15   69.88   14.65
   1  16  16    3.38   10.14
  -1 -16 -16    5.64   12.40
   1  16  17  189.34   18.03
  -1 -16 -17  218.64   22.54
   1  16  18   -2.25   11.27
  -1 -16 -18    3.38   18.03
   1  16  19   81.15   15.78
  -1 -16 -19   94.67   20.29
   1  16  20  -19.16   15.78
  -1 -16 -20   20.29   21.41
  -1 -17  20   24.79   14.65
   1  17 -19   12.40   10.14
  -1 -17  19   11.27   14.65
   1  17 -18   36.06   12.40
  -1 -17  18   43.95   20.29
   1  17 -17  471.10   25.92
  -1 -17  17  504.91   21.41
  -1 -17  16   11.27   13.52
  -1 -17  15   -9.02    9.02
   1  17 -14   34.94   11.27
  -1 -17  14    2.25    9.02
   1  17 -13  607.47   30.43
  -1 -17  13  609.72   20.29
  -1 -17  12   13.52    9.02
   1  17 -11    5.64    9.02
  -1 -17  11    2.25    6.76
   1  17 -10   20.29   10.14
  -1 -17  10   24.79    9.02
  -1 -17   9  371.92   14.65
   1  17  -8    2.25    9.02
  -1 -17   8   19.16    5.64
  -1 -17   7    9.02    5.64
  -1 -17   6   32.68    5.64
  -1 -17   5  688.61   16.91
  -1 -17   4   99.18    7.89
  -1 -17   3  132.99    9.02
  -1 -17   2   65.37    6.76
  -1 -17   1  608.60   15.78
  -1 -17   0   31.56    5.64
  -1 -17  -1   64.24    5.64
  -1 -17  -2   22.54    5.64
   1  17   3  715.66   36.06
  -1 -17  -3  689.74   16.91
   1  17   4   94.67   15.78
  -1 -17  -4   86.78    6.76
   1  17   5   60.86   12.40
  -1 -17  -5   71.00   10.14
   1  17   6   -5.64    9.02
  -1 -17  -6   -6.76    5.64
   1  17   7  850.91   39.45
  -1 -17  -7  803.57   22.54
   1  17   8   56.35   12.40
  -1 -17  -8   60.86    7.89
   1  17   9  109.32   16.91
  -1 -17  -9   72.13   10.14
   1  17  10   60.86   12.40
  -1 -17 -10   60.86    7.89
   1  17  11  488.00   28.18
  -1 -17 -11  438.41   16.91
   1  17  12   52.97   13.52
  -1 -17 -12   25.92   11.27
   1  17  13   89.04   16.91
  -1 -17 -13   85.65   11.27
   1  17  14    2.25    9.02
  -1 -17 -14    3.38    9.02
   1  17  15  275.00   21.41
  -1 -17 -15  228.79   15.78
   1  17  16    3.38   15.78
  -1 -17 -16   46.21   19.16
   1  17  17   99.18   19.16
  -1 -17 -17   75.51   16.91
   1  17  18  -13.52   16.91
  -1 -17 -18   37.19   20.29
   1  17  19  203.99   23.67
  -1 -17 -19  249.07   25.92
   1  17  20   34.94   12.40
  -1 -17 -20   80.02   27.05
  -1 -18  20   -3.38   20.29
   1  18 -19  130.74   18.03
  -1 -18  19  119.47   25.92
   1  18 -18   87.91   19.16
  -1 -18  18   10.14   43.95
   1  18 -17   33.81   15.78
  -1 -18  17   15.78   20.29
   1  18 -16   72.13   16.91
  -1 -18  16   85.65   18.03
   1  18 -15  316.70   21.41
  -1 -18  15  356.14   21.41
   1  18 -14   82.27   13.52
  -1 -18  14   69.88   13.52
   1  18 -13   15.78   13.52
  -1 -18  13   -1.13    9.02
   1  18 -12  103.69   14.65
  -1 -18  12   73.26   11.27
   1  18 -11  289.65   22.54
  -1 -18  11  284.01   12.40
   1  18 -10  194.98   18.03
  -1 -18  10  194.98   10.14
  -1 -18   9    7.89    5.64
  -1 -18   8  147.64    9.02
  -1 -18   7  355.01   11.27
  -1 -18   6  208.50   10.14
  -1 -18   5   -1.13    5.64
  -1 -18   4  258.09   12.40
  -1 -18   3  485.75   19.16
  -1 -18   2  123.97    7.89
  -1 -18   1   75.51    6.76
  -1 -18   0  227.66   10.14
  -1 -18  -1  437.29   13.52
  -1 -18  -2  395.59   12.40
  -1 -18  -3   64.24    6.76
   1  18   4   12.40   10.14
  -1 -18  -4   16.91    5.64
   1  18   5  679.60   33.81
  -1 -18  -5  659.31   19.16
   1  18   6  299.79   22.54
  -1 -18  -6  300.92   12.40
   1  18   7   31.56   11.27
  -1 -18  -7   39.45    9.02
  -1 -18  -8   37.19   11.27
   1  18   9  303.17   21.41
  -1 -18  -9  352.76   14.65
   1  18  10  245.69   18.03
  -1 -18 -10  256.96   15.78
   1  18  11   86.78   16.91
  -1 -18 -11   66.49   11.27
   1  18  12   18.03   11.27
  -1 -18 -12   22.54   11.27
   1  18  13  220.90   20.29
  -1 -18 -13  181.45   21.41
   1  18  14  215.26   22.54
  -1 -18 -14  232.17   25.92
   1  18  15   41.70   14.65
  -1 -18 -15   57.48   15.78
  -1 -18 -16  -30.43   19.16
   1  18  17  137.50   16.91
  -1 -18 -17  107.07   25.92
   1  18  18   76.64   14.65
  -1 -18 -18  103.69   19.16
   1  18  19    9.02   12.40
  -1 -18 -19   28.18   22.54
   1  19 -19  -14.65   15.78
  -1 -19  19   31.56   23.67
   1  19 -18  178.07   21.41
  -1 -19  18  174.69   25.92
   1  19 -17   74.38   18.03
  -1 -19  17   93.54   16.91
   1  19 -16  197.23   21.41
  -1 -19  16  217.52   28.18
   1  19 -15    3.38   11.27
  -1 -19  15   11.27   12.40
   1  19 -14  105.94   15.78
  -1 -19  14   98.05   23.67
   1  19 -13  206.25   21.41
  -1 -19  13  156.66   13.52
   1  19 -12  216.39   19.16
  -1 -19  12  181.45   11.27
  -1 -19  11   -9.02    6.76
  -1 -19  10  249.07   12.40
  -1 -19   9   95.80    9.02
  -1 -19   8  286.27   12.40
  -1 -19   7    0.00    6.76
  -1 -19   6  334.73   12.40
  -1 -19   5  330.22   13.52
  -1 -19   4  562.39   14.65
  -1 -19   3    1.13    5.64
  -1 -19   2   66.49   10.14
  -1 -19   1   86.78    9.02
  -1 -19   0  183.71    9.02
  -1 -19  -1   14.65    5.64
  -1 -19  -2  116.08    7.89
  -1 -19  -3  263.72   12.40
  -1 -19  -4  660.44   18.03
   1  19   5   67.62   13.52
  -1 -19  -5   60.86    6.76
   1  19   6   83.40   13.52
  -1 -19  -6   78.89    9.02
   1  19   7  203.99   22.54
  -1 -19  -7  213.01   14.65
   1  19   8  598.45   38.32
  -1 -19  -8  548.86   31.56
   1  19   9   27.05   11.27
  -1 -19  -9   34.94   10.14
   1  19  10  -18.03   18.03
  -1 -19 -10   37.19   18.03
   1  19  11  156.66   16.91
  -1 -19 -11  164.55   18.03
   1  19  12  392.21   27.05
  -1 -19 -12  329.09   31.56
   1  19  13   11.27   12.40
  -1 -19 -13   23.67   19.16
   1  19  14   22.54   12.40
  -1 -19 -14   12.40   15.78
   1  19  15  156.66   22.54
  -1 -19 -15   87.91   23.67
   1  19  16  349.38   27.05
  -1 -19 -16  284.01   27.05
   1  19  17    7.89   16.91
  -1 -19 -17   34.94   22.54
   1  19  18   -6.76   18.03
  -1 -19 -18   18.03   15.78
   1  20 -18   82.27   19.16
  -1 -20  18   96.92   13.52
   1  20 -17   -9.02   16.91
  -1 -20  17    9.02   10.14
   1  20 -16  191.59   19.16
  -1 -20  16  198.36   19.16
   1  20 -15   12.40   12.40
  -1 -20  15   10.14    9.02
   1  20 -14  138.62   21.41
  -1 -20  14  169.05   15.78
  -1 -20  13   11.27   10.14
  -1 -20  12  180.32   13.52
  -1 -20  11   23.67   10.14
  -1 -20  10  340.36   18.03
  -1 -20   9  -28.18    9.02
  -1 -20   8  169.05   10.14
  -1 -20   7    7.89    6.76
  -1 -20   6  574.78   23.67
  -1 -20   5    5.64    7.89
  -1 -20   4  287.39   14.65
  -1 -20   3   93.54    7.89
  -1 -20   2  446.30   13.52
  -1 -20   1   -3.38    5.64
  -1 -20   0  166.80    9.02
  -1 -20  -1    7.89    7.89
  -1 -20  -2  549.99   16.91
  -1 -20  -3    4.51    7.89
  -1 -20  -4  146.51   10.14
  -1 -20  -5    4.51    7.89
   1  20   6  568.02   31.56
  -1 -20  -6  511.67   21.41
   1  20   7   -4.51   14.65
   1  20   8   77.76   16.91
  -1 -20  -8   71.00   14.65
   1  20   9   32.68   13.52
  -1 -20  -9   33.81   12.40
   1  20  10  617.61   37.19
  -1 -20 -10  561.26   38.32
   1  20  11   -2.25   11.27
  -1 -20 -11   -7.89   12.40
   1  20  12  -48.46   18.03
  -1 -20 -12   40.57   15.78
   1  20  13   -1.13   15.78
  -1 -20 -13    9.02   19.16
   1  20  14  306.55   23.67
  -1 -20 -14  322.33   25.92
   1  20  15    7.89   12.40
  -1 -20 -15  -11.27   22.54
   1  20  16   20.29   19.16
  -1 -20 -16   -7.89   21.41
   1  20  17   10.14   19.16
  -1 -20 -17   16.91   16.91
  -1 -21  17   49.59   13.52
  -1 -21  16   98.05   12.40
  -1 -21  15  -10.14    9.02
  -1 -21  14  284.01   19.16
  -1 -21  13   14.65   11.27
  -1 -21  12  268.23   20.29
  -1 -21  11    0.00   10.14
  -1 -21  10  174.69   14.65
  -1 -21   9   21.41   12.40
  -1 -21   8  264.85   15.78
  -1 -21   7   -1.13    7.89
  -1 -21   6  111.58   19.16
  -1 -21   5    5.64   11.27
  -1 -21   4  293.03   15.78
  -1 -21   3   28.18    9.02
  -1 -21   2  193.85   14.65
  -1 -21   1    6.76   11.27
  -1 -21   0  572.53   32.68
  -1 -21  -1   -1.13    9.02
  -1 -21  -2  101.43   12.40
  -1 -21  -3    3.38   10.14
  -1 -21  -4  327.97   18.03
  -1 -21  -5   25.92    9.02
  -1 -21  -6   77.76   12.40
  -1 -21  -7   48.46   11.27
   1  21   8  642.41   34.94
  -1 -21  -8  577.04   24.79
   1  21   9    6.76   11.27
  -1 -21  -9   16.91   14.65
   1  21  10   51.84   16.91
  -1 -21 -10   50.72   22.54
   1  21  11   32.68   12.40
  -1 -21 -11    3.38   13.52
   1  21  12  375.30   25.92
  -1 -21 -12  389.95   31.56
   1  21  13   -2.25   18.03
  -1 -21 -13  -39.45   21.41
  -1 -21 -14    9.02   21.41
   1  21  15    3.38   12.40
  -1 -21 -15   24.79   16.91
   1  21  16  316.70   23.67
  -1 -21 -16  366.28   33.81
  -1 -22  15  157.78   18.03
  -1 -22  14  118.34   16.91
  -1 -22  13   -3.38   11.27
  -1 -22  12  189.34   15.78
  -1 -22  11  100.31   13.52
  -1 -22  10  185.96   14.65
  -1 -22   9   32.68   13.52
  -1 -22   8  134.12   13.52
  -1 -22   7  197.23   15.78
  -1 -22   6  222.02   15.78
  -1 -22   5   22.54   11.27
  -1 -22   4  108.19   16.91
  -1 -22   3  151.02   15.78
  -1 -22   2  243.44   16.91
  -1 -22   1   39.45   11.27
  -1 -22   0    7.89   11.27
  -1 -22  -1  140.88   13.52
  -1 -22  -2  276.12   18.03
  -1 -22  -3   49.59   14.65
  -1 -22  -4   81.15   14.65
  -1 -22  -5   85.65   13.52
  -1 -22  -6  336.98   18.03
  -1 -22  -7   65.37   13.52
  -1 -22  -8   50.72   11.27
   1  22   9  101.43   16.91
  -1 -22  -9   83.40   15.78
   1  22  10  392.21   29.30
  -1 -22 -10  406.86   20.29
   1  22  11   29.30   19.16
  -1 -22 -11   57.48   18.03
   1  22  12   18.03   13.52
  -1 -22 -12   23.67   16.91
   1  22  13   86.78   21.41
  -1 -22 -13   54.10   24.79
   1  22  14  291.90   27.05
  -1 -22 -14  215.26   29.30
   1  22  15   31.56   19.16
  -1 -22 -15   22.54   18.03
  -1 -23  14   77.76   16.91
  -1 -23  13  245.69   18.03
  -1 -23  12   20.29   14.65
  -1 -23  11    5.64   14.65
  -1 -23  10  100.31   13.52
  -1 -23   9  185.96   15.78
  -1 -23   8   67.62   14.65
  -1 -23   7  -24.79   19.16
  -1 -23   6   56.35   11.27
  -1 -23   5  320.08   19.16
  -1 -23   4  122.85   14.65
  -1 -23   3   33.81   10.14
  -1 -23   2    0.00   11.27
  -1 -23   1  323.46   18.03
  -1 -23   0  185.96   15.78
  -1 -23  -1   46.21   11.27
  -1 -23  -2    5.64    9.02
  -1 -23  -3  237.80   19.16
  -1 -23  -4  118.34   15.78
  -1 -23  -5   74.38   12.40
  -1 -23  -6    3.38   10.14
  -1 -23  -7  213.01   18.03
  -1 -23  -8  149.89   14.65
  -1 -23  -9   50.72   15.78
  -1 -23 -10   10.14   11.27
  -1 -23 -11  118.34   16.91
   1  23  12   94.67   18.03
  -1 -23 -12  108.19   13.52
   1  23  13   37.19   15.78
  -1 -23 -13   27.05   12.40
  -1 -24  13    6.76   12.40
  -1 -24  12   15.78   11.27
  -1 -24  11  216.39   19.16
  -1 -24  10   18.03   12.40
  -1 -24   9   16.91   11.27
  -1 -24   8   24.79   13.52
  -1 -24   7  276.12   18.03
  -1 -24   6   19.16   12.40
  -1 -24   5   20.29   15.78
  -1 -24   4  -16.91   12.40
  -1 -24   3  393.33   21.41
  -1 -24   2   49.59   12.40
  -1 -24   1   80.02   18.03
  -1 -24   0    4.51   14.65
  -1 -24  -1  331.35   19.16
  -1 -24  -2   33.81   12.40
  -1 -24  -3   48.46   13.52
  -1 -24  -4   16.91   12.40
  -1 -24  -5  307.68   20.29
  -1 -24  -6   27.05   12.40
  -1 -24  -7   38.32   15.78
  -1 -24  -8    0.00   11.27
  -1 -24  -9  323.46   29.30
  -1 -24 -10   10.14   18.03
  -1 -24 -11   78.89   14.65
  -1 -24 -12  -13.52   11.27
  -1 -25  11   11.27   12.40
  -1 -25  10  -24.79   16.91
  -1 -25   9  303.17   27.05
  -1 -25   8  -15.78   15.78
  -1 -25   7   11.27   14.65
  -1 -25   6   12.40   13.52
  -1 -25   5  374.17   19.16
  -1 -25   4    3.38   11.27
  -1 -25   3   46.21   13.52
  -1 -25   2  -24.79   14.65
  -1 -25   1  358.40   19.16
  -1 -25   0  -10.14   12.40
  -1 -25  -1  111.58   15.78
  -1 -25  -2   12.40   12.40
  -1 -25  -3  279.50   19.16
  -1 -25  -4   14.65   15.78
  -1 -25  -5  102.56   16.91
  -1 -25  -6   -9.02   13.52
  -1 -25  -7  259.22   21.41
  -1 -25  -8   16.91   11.27
  -1 -25  -9   78.89   15.78
  -1 -25 -10   10.14   12.40
  -1 -26   8   -2.25   14.65
  -1 -26   7  181.45   18.03
  -1 -26   6   22.54   16.91
  -1 -26   5   13.52   13.52
  -1 -26   4   14.65   16.91
  -1 -26   3  188.21   19.16
  -1 -26   2   55.22   12.40
  -1 -26   1   54.10   12.40
  -1 -26   0    2.25   13.52
  -1 -26  -1  207.37   19.16
  -1 -26  -2   52.97   14.65
  -1 -26  -3   71.00   13.52
  -1 -26  -4   25.92   12.40
  -1 -26  -5  235.55   19.16
  -1 -26  -6   51.84   13.52
  -1 -26  -7   43.95   15.78
  -1 -26  -8   22.54   18.03
  -1 -27   5   34.94   19.16
  -1 -27   4   66.49   25.92
  -1 -27   3   10.14   16.91
  -1 -27   2   12.40   16.91
  -1 -27   1   68.75   19.16
  -1 -27   0  151.02   16.91
  -1 -27  -1   28.18   13.52
  -1 -27  -2   40.57   13.52
  -1 -27  -3  104.81   20.29
  -1 -27  -4  162.29   21.41
   2   0 -25   -7.89   10.14
   2   0 -24   12.40   10.14
   2   0 -23    3.38    7.89
   2   0 -22  472.23   24.79
   2   0 -21   -2.25    4.51
   2   0 -20    9.02    4.51
   2   0 -19   -2.25    3.38
   2   0 -18  725.81   21.41
   2   0 -17   -3.38    4.51
   2   0 -16   77.76   10.14
   2   0 -15   -4.51    3.38
   2   0 -14 1110.12   31.56
   2   0 -13   -4.51    3.38
   2   0 -12  261.47    9.02
   2   0 -11   -3.38    2.25
   2   0 -10 2676.69   66.49
   2   0  -9   -4.51    2.25
   2   0  -8  335.85   14.65
   2   0  -7    1.13    2.25
   2   0  -6  109.32    3.38
   2   0  -5    0.00    1.13
   2   0  -4   31.56    1.13
   2   0  -3    1.13    0.01
   2   0  -2 1052.64   37.19
   2   0   2  866.69   28.18
   2   0   3    6.76    1.13
   2   0   4 3155.68   73.26
   2   0   5   -1.13    1.13
   2   0   6  192.72    7.89
   2   0   7   -2.25    2.25
   2   0  12  402.35   18.03
   2   0  13    5.64    3.38
   2   0  14  131.86    7.89
   2   0  15    3.38    5.64
   2   0  16  635.64   20.29
   2   0  17  -12.40    6.76
   2   0  18  219.77   19.16
   2   0  19    4.51   13.52
   2   0  20  330.22   16.91
   2   0  21    0.00    7.89
   2   0  22  129.61   15.78
   2   0  23  -27.05   15.78
   2   0  24  347.12   30.43
  -2  -1  26   21.41   19.16
  -2  -1  25   -7.89   14.65
  -2  -1  24  281.76   20.29
   2   1 -23   18.03    6.76
  -2  -1  23   24.79    7.89
   2   1 -22   46.21    7.89
  -2  -1  22   39.45    7.89
   2   1 -21   11.27    5.64
  -2  -1  21    4.51    4.51
   2   1 -20  806.95   21.41
  -2  -1  20  753.98   20.29
   2   1 -19   99.18    5.64
  -2  -1  19   99.18    7.89
   2   1 -18   67.62    6.76
  -2  -1  18   72.13    6.76
   2   1 -17   58.61    6.76
  -2  -1  17   45.08    5.64
   2   1 -16  601.83   19.16
  -2  -1  16  593.94   23.67
   2   1 -15   94.67    7.89
  -2  -1  15  103.69    6.76
   2   1 -14  244.57    9.02
  -2  -1  14  237.80    9.02
   2   1 -13    6.76    6.76
  -2  -1  13    5.64    3.38
   2   1 -12 1067.30   28.18
  -2  -1  12 1083.07   28.18
   2   1 -11  542.10   15.78
  -2  -1  11  530.83   15.78
   2   1 -10   86.78    5.64
  -2  -1  10   83.40    5.64
   2   1  -9   18.03    3.38
  -2  -1   9   14.65    2.25
   2   1  -8 2090.64   75.51
  -2  -1   8 2052.32   51.84
   2   1  -7  105.94    5.64
  -2  -1   7  101.43    4.51
   2   1  -6   48.46    3.38
  -2  -1   6   47.34    4.51
  -2  -1   5  263.72    7.89
   2   1  -4  530.83   20.29
  -2  -1   4  510.54   11.27
   2   1  -3  126.23    3.38
  -2  -1   3  132.99    4.51
  -2  -1   2   55.22    3.38
   2   1  -1   98.05    4.51
  -2  -1   1   99.18    3.38
   2   1   0  728.06   30.43
  -2  -1   0  769.76   25.92
  -2  -1  -3   18.03    1.13
  -2  -1  -4 1639.83   38.32
  -2  -1  -5  110.45    3.38
  -2  -1  -6 1298.34   45.08
  -2  -1  -7    7.89    4.51
   2   1   8  348.25   14.65
  -2  -1  -8  351.63   10.14
   2   1   9  720.17   25.92
  -2  -1  -9  738.20   20.29
   2   1  10  905.00   32.68
  -2  -1 -10  938.82   31.56
  -2  -1 -11   11.27    3.38
   2   1  12  729.19   30.43
  -2  -1 -12  710.03   25.92
   2   1  13  128.48    6.76
  -2  -1 -13  126.23    9.02
   2   1  14  757.36   36.06
  -2  -1 -14  769.76   23.67
   2   1  15  131.86   13.52
  -2  -1 -15  134.12    7.89
   2   1  16  173.56   14.65
  -2  -1 -16  169.05   10.14
   2   1  17  137.50   14.65
  -2  -1 -17  123.97    9.02
   2   1  18  608.60   30.43
  -2  -1 -18  611.98   21.41
   2   1  19   -2.25   12.40
  -2  -1 -19    3.38    5.64
   2   1  20  137.50   18.03
  -2  -1 -20  152.15    7.89
   2   1  21  102.56   13.52
  -2  -1 -21  105.94   12.40
   2   1  22  430.53   23.67
  -2  -1 -22  439.54   22.54
   2   1  23    1.13   15.78
  -2  -1 -23  -19.16   15.78
   2   1  24   87.91   20.29
  -2  -1 -24   94.67   19.16
  -2  -2  26  122.85   14.65
  -2  -2  25   69.88   12.40
  -2  -2  24   16.91    7.89
   2   2 -23  138.62   13.52
  -2  -2  23  148.77   10.14
  -2  -2  22  222.02   12.40
   2   2 -21  197.23    7.89
  -2  -2  21  211.88   10.14
   2   2 -20   19.16    5.64
  -2  -2  20   24.79    5.64
   2   2 -19  210.75   10.14
  -2  -2  19  198.36   10.14
   2   2 -18  376.43   13.52
  -2  -2  18  387.70   13.52
   2   2 -17  193.85    9.02
  -2  -2  17  164.55    7.89
  -2  -2  16  350.51   12.40
   2   2 -15  107.07    7.89
  -2  -2  15  116.08    6.76
   2   2 -14  539.85   16.91
  -2  -2  14  535.34   16.91
   2   2 -13  840.76   24.79
   2   2 -12   13.52    3.38
  -2  -2  12   15.78    6.76
   2   2 -11   64.24    5.64
  -2  -2  11   75.51    4.51
   2   2 -10  732.57   29.30
  -2  -2  10  734.82   21.41
   2   2  -9 1489.93   37.19
  -2  -2   9 1491.06   39.45
   2   2  -8  173.56    5.64
  -2  -2   8  165.67    9.02
   2   2  -7   46.21    2.25
  -2  -2   7   43.95    5.64
   2   2  -6  412.49    9.02
  -2  -2   6  395.59   11.27
   2   2  -5 1168.73   28.18
  -2  -2   5 1127.03   23.67
   2   2  -4  954.59   33.81
  -2  -2   4  976.01   15.78
   2   2  -3   16.91    1.13
  -2  -2   3   13.52    1.13
   2   2  -2  113.83    4.51
  -2  -2   2  117.21    3.38
   2   2  -1  140.88    5.64
  -2  -2   1  152.15    7.89
  -2  -2  -5  130.74    6.76
  -2  -2  -6  600.71   22.54
  -2  -2  -7 1154.08   29.30
  -2  -2  -8  295.28    9.02
  -2  -2  -9   81.15    4.51
  -2  -2 -10  190.47    6.76
   2   2  11  782.16   43.95
  -2  -2 -11  837.38   22.54
   2   2  12  286.27   22.54
  -2  -2 -12  306.55   10.14
   2   2  13    6.76    5.64
  -2  -2 -13    9.02    6.76
   2   2  14  270.49   18.03
  -2  -2 -14  281.76   11.27
   2   2  15  149.89   15.78
  -2  -2 -15  156.66    9.02
   2   2  16  436.16   23.67
  -2  -2 -16  455.32   15.78
   2   2  17  130.74   13.52
  -2  -2 -17  122.85    7.89
   2   2  18   98.05   13.52
  -2  -2 -18   86.78    7.89
   2   2  19  191.59   20.29
  -2  -2 -19  175.82    9.02
   2   2  20  196.10   14.65
  -2  -2 -20  206.25    9.02
   2   2  21   31.56   11.27
  -2  -2 -21   20.29    6.76
   2   2  22   93.54   13.52
  -2  -2 -22   69.88    6.76
   2   2  23  223.15   24.79
  -2  -2 -23  229.91   25.92
   2   2  24  182.58   22.54
  -2  -2 -24  182.58   22.54
  -2  -2 -25   38.32   13.52
  -2  -3  26   12.40   12.40
  -2  -3  25   93.54   13.52
  -2  -3  24  114.96   13.52
   2   3 -23  180.32   14.65
  -2  -3  23  207.37   13.52
  -2  -3  22   23.67    7.89
   2   3 -21  190.47   10.14
  -2  -3  21  185.96   12.40
   2   3 -20   49.59    6.76
  -2  -3  20   83.40    7.89
   2   3 -19  537.59   20.29
  -2  -3  19  568.02   19.16
   2   3 -18   33.81    4.51
  -2  -3  18   37.19    6.76
   2   3 -17  309.93   11.27
  -2  -3  17  299.79   12.40
   2   3 -16  384.32   18.03
  -2  -3  16  384.32   16.91
   2   3 -15  772.01   22.54
  -2  -3  15  759.62   46.21
   2   3 -14   12.40    4.51
  -2  -3  14    3.38    5.64
   2   3 -13   46.21    4.51
  -2  -3  13   38.32    4.51
   2   3 -12  174.69    6.76
  -2  -3  12  178.07    7.89
   2   3 -11 1115.76   29.30
  -2  -3  11 1104.49   31.56
   2   3 -10   23.67    6.76
  -2  -3  10   16.91    4.51
   2   3  -9  500.40   14.65
  -2  -3   9  488.00   19.16
   2   3  -8   24.79    2.25
  -2  -3   8   24.79    2.25
   2   3  -7 2736.43   51.84
  -2  -3   7 2694.73   66.49
   2   3  -6   28.18    2.25
  -2  -3   6   28.18    2.25
   2   3  -5  121.72    5.64
  -2  -3   5  113.83    3.38
  -2  -3   4  102.56    2.25
   2   3  -3 3330.37  135.24
  -2  -3   3 4227.49   73.26
   2   3  -2    3.38    1.13
  -2  -3   2    2.25    1.13
   2   3  -1    0.00    1.13
  -2  -3   1    0.00    1.13
   2   3   0  210.75   10.14
  -2  -3   0  185.96   10.14
   2   3   1 1573.33   57.48
  -2  -3  -1 1203.67   59.73
  -2  -3  -6    9.02    2.25
  -2  -3  -7    4.51    3.38
   2   3   8  193.85   14.65
  -2  -3  -8  206.25    9.02
   2   3   9 1142.81   68.75
  -2  -3  -9 1471.90   37.19
  -2  -3 -10  200.61    6.76
  -2  -3 -11    2.25    3.38
   2   3  12   27.05    6.76
  -2  -3 -12   15.78    4.51
   2   3  13  965.86   41.70
  -2  -3 -13  976.01   22.54
   2   3  14  194.98   13.52
  -2  -3 -14  206.25    7.89
   2   3  15  163.42   15.78
  -2  -3 -15  161.17    7.89
   2   3  16  116.08   14.65
  -2  -3 -16  107.07    9.02
   2   3  17  387.70   23.67
  -2  -3 -17  392.21   14.65
   2   3  18   90.16   12.40
  -2  -3 -18   99.18    9.02
   2   3  19   15.78   13.52
  -2  -3 -19   18.03    5.64
   2   3  20   23.67    7.89
  -2  -3 -20   25.92    6.76
   2   3  21  455.32   21.41
  -2  -3 -21  466.59   20.29
   2   3  22   90.16   13.52
  -2  -3 -22   82.27   11.27
   2   3  23   49.59   16.91
  -2  -3 -23   18.03   10.14
   2   3  24    4.51   15.78
  -2  -3 -24    5.64   10.14
  -2  -4  26  -10.14   15.78
  -2  -4  25  189.34   19.16
  -2  -4  24  -12.40    9.02
   2   4 -23  113.83   12.40
  -2  -4  23  116.08   10.14
   2   4 -22   -7.89    6.76
  -2  -4  22   -1.13    5.64
   2   4 -21  290.77   12.40
  -2  -4  21  275.00   11.27
   2   4 -20   -4.51    9.02
  -2  -4  20   -4.51    5.64
   2   4 -19  201.74   10.14
  -2  -4  19  207.37   10.14
   2   4 -18   -4.51    4.51
  -2  -4  18   -1.13    5.64
   2   4 -17  821.60   25.92
  -2  -4  17  839.64   25.92
   2   4 -16  -19.16    7.89
  -2  -4  16    4.51    5.64
   2   4 -15   34.94   33.81
  -2  -4  15  120.59    7.89
   2   4 -14   49.59   10.14
  -2  -4  14   50.72    4.51
   2   4 -13 1241.99   49.59
  -2  -4  13 1315.24   36.06
   2   4 -12    0.00    4.51
  -2  -4  12    2.25    6.76
   2   4 -11 1170.98   43.95
  -2  -4  11 1096.60   41.70
   2   4 -10   72.13    4.51
  -2  -4  10   85.65   16.91
   2   4  -9 3136.52   75.51
  -2  -4   9 3010.29   74.38
   2   4  -8   13.52    2.25
  -2  -4   8   11.27    3.38
   2   4  -7  839.64   23.67
  -2  -4   7  800.19   21.41
   2   4  -6    9.02    2.25
  -2  -4   6    4.51    2.25
   2   4  -5 2938.16   99.18
  -2  -4   5 2843.49   50.72
  -2  -4   4  486.88   13.52
   2   4  -3  845.27   43.95
  -2  -4   3 1256.64   27.05
   2   4  -2    7.89    2.25
  -2  -4   2    4.51    1.13
   2   4  -1 2418.60   74.38
  -2  -4   1 2836.73   77.76
   2   4   0  703.27   22.54
  -2  -4   0  775.40   22.54
   2   4   1  660.44   28.18
  -2  -4  -1  516.18   28.18
   2   4   2    6.76    3.38
   2   4   3 2103.04   83.40
  -2  -4  -3 1379.48   75.51
   2   4   4  108.19    9.02
   2   4   6    4.51    3.38
   2   4   7  614.23   38.32
  -2  -4  -7  743.84   28.18
   2   4   8   21.41    6.76
  -2  -4  -8   18.03    3.38
   2   4   9   -5.64    5.64
  -2  -4  -9    5.64    4.51
   2   4  10  100.31   12.40
  -2  -4 -10   90.16    5.64
   2   4  11 1176.62   56.35
  -2  -4 -11 1328.77   33.81
   2   4  12   14.65    6.76
  -2  -4 -12    1.13    4.51
   2   4  13   38.32    7.89
  -2  -4 -13   34.94    4.51
   2   4  14   22.54   10.14
  -2  -4 -14   24.79    3.38
   2   4  15  666.07   31.56
  -2  -4 -15  710.03   19.16
   2   4  16   11.27   10.14
  -2  -4 -16    3.38    4.51
   2   4  17   22.54    9.02
  -2  -4 -17   21.41    6.76
   2   4  18    5.64   10.14
  -2  -4 -18   11.27    6.76
   2   4  19  681.85   39.45
  -2  -4 -19  655.93   20.29
   2   4  20  -10.14    6.76
  -2  -4 -20    0.00    9.02
   2   4  21    6.76   10.14
  -2  -4 -21   15.78   10.14
   2   4  22    5.64   10.14
  -2  -4 -22   -4.51    9.02
   2   4  23  483.50   31.56
  -2  -4 -23  433.91   18.03
   2   4  24   13.52   14.65
  -2  -4 -24   -1.13    7.89
  -2  -4 -25   15.78   16.91
  -2  -5  26   16.91   15.78
  -2  -5  25  111.58   13.52
  -2  -5  24   28.18   11.27
   2   5 -23  347.12   21.41
  -2  -5  23  341.49   15.78
  -2  -5  22  -14.65    7.89
   2   5 -21   96.92    9.02
  -2  -5  21  102.56    9.02
   2   5 -20   41.70    6.76
  -2  -5  20   69.88    6.76
   2   5 -19  467.72   16.91
  -2  -5  19  488.00   16.91
   2   5 -18  -12.40    3.38
  -2  -5  18   -1.13    4.51
   2   5 -17   64.24    5.64
  -2  -5  17   60.86    5.64
   2   5 -16    4.51    6.76
  -2  -5  16    2.25    5.64
  -2  -5  15  649.17   20.29
   2   5 -14   69.88   12.40
  -2  -5  14   76.64    5.64
  -2  -5  13  251.33   14.65
   2   5 -12    9.02    3.38
  -2  -5  12    7.89    5.64
   2   5 -11 1729.99   45.08
  -2  -5  11 1762.67   64.24
   2   5 -10  163.42    6.76
  -2  -5  10  156.66    9.02
   2   5  -9  391.08   12.40
  -2  -5   9  376.43   12.40
   2   5  -8  207.37    7.89
  -2  -5   8  213.01    7.89
   2   5  -7 1332.15   33.81
  -2  -5   7 1269.03   33.81
   2   5  -6   39.45    4.51
  -2  -5   6   32.68    3.38
   2   5  -5  961.36   33.81
  -2  -5   5  964.74   21.41
  -2  -5   4  516.18   14.65
   2   5  -3 1133.79   59.73
  -2  -5   3 1808.88   47.34
   2   5  -2   85.65    4.51
  -2  -5   2   90.16    4.51
   2   5  -1  241.18    9.02
  -2  -5   1  244.57    9.02
   2   5   0   91.29    6.76
  -2  -5   0   77.76    7.89
   2   5   2  131.86    9.02
   2   5   3   65.37    6.76
  -2  -5  -3   77.76    6.76
   2   5   4  125.10   11.27
   2   5   5 1532.76   60.86
   2   5   6  100.31   10.14
   2   5   7    6.76    4.51
   2   5   8  701.01   34.94
  -2  -5  -8  760.74   29.30
   2   5   9  822.73   43.95
  -2  -5  -9  933.18   33.81
   2   5  10   93.54   11.27
  -2  -5 -10   86.78    6.76
   2   5  11   -4.51    4.51
  -2  -5 -11    5.64    5.64
   2   5  12  240.06   18.03
  -2  -5 -12  233.29    7.89
   2   5  13 1364.83   64.24
  -2  -5 -13 1387.37   31.56
   2   5  14   50.72   10.14
  -2  -5 -14   65.37    4.51
   2   5  15    1.13    6.76
  -2  -5 -15    1.13    3.38
   2   5  16   40.57   13.52
  -2  -5 -16   55.22    5.64
   2   5  17  772.01   38.32
  -2  -5 -17  764.13   20.29
   2   5  18   12.40   13.52
  -2  -5 -18    6.76    6.76
   2   5  19   18.03   15.78
  -2  -5 -19   12.40    5.64
   2   5  20   16.91    9.02
  -2  -5 -20    6.76    7.89
   2   5  21  478.99   21.41
  -2  -5 -21  465.46   15.78
   2   5  22   55.22   15.78
  -2  -5 -22   55.22    9.02
   2   5  23   38.32   15.78
  -2  -5 -23   47.34    9.02
   2   5  24    5.64   15.78
  -2  -5 -24   -3.38   10.14
  -2  -6  25  101.43   13.52
  -2  -6  24   -6.76    9.02
  -2  -6  23   54.10   10.14
   2   6 -22  213.01   14.65
  -2  -6  22  192.72   11.27
   2   6 -21  108.19   12.40
  -2  -6  21  123.97   10.14
   2   6 -20    4.51    5.64
  -2  -6  20   -1.13    7.89
   2   6 -19  116.08    7.89
  -2  -6  19  130.74    7.89
   2   6 -18  308.81   12.40
  -2  -6  18  295.28   10.14
   2   6 -17  781.03   24.79
  -2  -6  17  783.29   21.41
   2   6 -16   71.00   10.14
  -2  -6  16   60.86    6.76
   2   6 -15   25.92    9.02
  -2  -6  15   15.78   11.27
   2   6 -14  281.76   11.27
  -2  -6  14  285.14   14.65
   2   6 -13  476.73   15.78
  -2  -6  13  503.78   22.54
   2   6 -12   56.35    5.64
  -2  -6  12   51.84    6.76
   2   6 -11  631.14   20.29
  -2  -6  11  641.28   24.79
   2   6 -10  684.11   19.16
  -2  -6  10  660.44   20.29
   2   6  -9  790.05   22.54
  -2  -6   9  796.81   23.67
   2   6  -8  608.60   18.03
  -2  -6   8  591.69   18.03
   2   6  -7  112.70    6.76
  -2  -6   7  110.45    4.51
   2   6  -6  617.61   23.67
  -2  -6   6  593.94   18.03
   2   6  -5 1803.25   61.99
  -2  -6   5 1737.88   37.19
  -2  -6   4  271.61    9.02
   2   6  -3  348.25   16.91
  -2  -6   3  377.55   11.27
   2   6  -2  448.56   22.54
  -2  -6   2  478.99   11.27
   2   6  -1  990.66   29.30
  -2  -6   1 1010.94   28.18
   2   6   0  432.78   18.03
  -2  -6   0  439.54   13.52
   2   6   1    5.64    3.38
  -2  -6  -1    5.64    3.38
   2   6   2 1416.68   45.08
   2   6   3 1377.23   55.22
   2   6   4 2219.12   81.15
   2   6   5  413.62   20.29
  -2  -6  -5  420.38   21.41
   2   6   6  815.97   34.94
  -2  -6  -6  779.90   33.81
   2   6   7  308.81   18.03
  -2  -6  -7  293.03   18.03
   2   6   8    3.38    7.89
  -2  -6  -8   16.91    5.64
   2   6   9    1.13    6.76
  -2  -6  -9    2.25    3.38
   2   6  10  387.70   21.41
  -2  -6 -10  366.28   16.91
   2   6  11  632.26   31.56
  -2  -6 -11  605.21   22.54
   2   6  12  226.53   18.03
  -2  -6 -12  203.99    9.02
   2   6  13   10.14    7.89
  -2  -6 -13    0.00    4.51
   2   6  14  296.41   20.29
  -2  -6 -14  294.15   10.14
   2   6  15  553.37   30.43
  -2  -6 -15  610.85   15.78
   2   6  16  263.72   20.29
  -2  -6 -16  236.68    9.02
   2   6  17    0.00    9.02
  -2  -6 -17   -4.51    4.51
   2   6  18   76.64   16.91
  -2  -6 -18   72.13    6.76
   2   6  19  414.75   19.16
  -2  -6 -19  366.28   14.65
   2   6  20  243.44   16.91
  -2  -6 -20  216.39   11.27
   2   6  21    9.02    9.02
  -2  -6 -21    0.00    5.64
   2   6  22   68.75   16.91
  -2  -6 -22   76.64   10.14
   2   6  23  171.31   22.54
  -2  -6 -23  183.71   13.52
  -2  -6 -24  151.02   11.27
  -2  -7  25    3.38   14.65
  -2  -7  24  260.34   15.78
  -2  -7  23   43.95    9.02
   2   7 -22   18.03   10.14
  -2  -7  22   31.56   10.14
   2   7 -21    6.76    7.89
  -2  -7  21   13.52    9.02
   2   7 -20  428.27   15.78
  -2  -7  20  414.75   12.40
   2   7 -19   71.00    7.89
  -2  -7  19   68.75    6.76
   2   7 -18    5.64    6.76
  -2  -7  18   24.79    5.64
   2   7 -17   22.54    5.64
  -2  -7  17   16.91    5.64
   2   7 -16  352.76   18.03
  -2  -7  16  375.30   20.29
   2   7 -15  276.12   12.40
  -2  -7  15  262.60   16.91
   2   7 -14  100.31    7.89
  -2  -7  14  100.31    9.02
   2   7 -13   98.05    6.76
  -2  -7  13  105.94   10.14
   2   7 -12  482.37   15.78
  -2  -7  12  499.27   20.29
   2   7 -11  456.45   14.65
  -2  -7  11  450.81   15.78
   2   7 -10  136.37    6.76
  -2  -7  10  129.61    6.76
   2   7  -9  247.95    9.02
  -2  -7   9  241.18   10.14
   2   7  -8 1010.94   37.19
  -2  -7   8  971.50   19.16
   2   7  -7  348.25   14.65
  -2  -7   7  344.87   12.40
  -2  -7   6  698.76   21.41
   2   7  -5  288.52   12.40
  -2  -7   5  291.90    9.02
  -2  -7   4  555.63   15.78
   2   7  -3 1053.77   51.84
  -2  -7   3 1255.51   34.94
   2   7  -2 1803.25  135.24
  -2  -7   2  658.18   19.16
   2   7  -1   40.57    5.64
  -2  -7   1   -2.25   20.29
   2   7   0 1838.18  107.07
  -2  -7   0 1702.94   54.10
  -2  -7  -1  769.76   34.94
   2   7   2 1054.90   37.19
  -2  -7  -2  970.37   32.68
   2   7   3  803.57   32.68
  -2  -7  -3  682.98   23.67
   2   7   4  724.68   28.18
  -2  -7  -4  632.26   22.54
   2   7   5  553.37   28.18
  -2  -7  -5  493.64   18.03
   2   7   6  675.09   31.56
  -2  -7  -6  671.71   30.43
   2   7   7   29.30    9.02
  -2  -7  -7   39.45    6.76
   2   7   8  810.33   40.57
  -2  -7  -8  669.46   30.43
   2   7   9  130.74   13.52
  -2  -7  -9  120.59    7.89
   2   7  10  542.10   25.92
  -2  -7 -10  536.47   19.16
   2   7  11   48.46    9.02
  -2  -7 -11   39.45    5.64
   2   7  12  502.65   50.72
  -2  -7 -12  668.33   21.41
   2   7  13  153.28   13.52
  -2  -7 -13  142.01    7.89
   2   7  14  477.86   25.92
  -2  -7 -14  477.86   16.91
   2   7  15   -3.38   13.52
  -2  -7 -15   -1.13    4.51
   2   7  16  265.98   14.65
  -2  -7 -16  260.34    9.02
   2   7  17  136.37   15.78
  -2  -7 -17  120.59    6.76
   2   7  18  376.43   25.92
  -2  -7 -18  398.97   12.40
   2   7  19   -6.76    6.76
  -2  -7 -19    1.13    5.64
   2   7  20  142.01   14.65
  -2  -7 -20  116.08    7.89
   2   7  21   51.84   10.14
  -2  -7 -21   42.83    9.02
   2   7  22  287.39   27.05
  -2  -7 -22  272.74   14.65
   2   7  23  -18.03   15.78
  -2  -7 -23    4.51    6.76
  -2  -7 -24   60.86   21.41
  -2  -8  25    4.51   18.03
  -2  -8  24    7.89    9.02
  -2  -8  23  -12.40    7.89
   2   8 -22  403.48   23.67
  -2  -8  22  449.68   19.16
   2   8 -21   -1.13    7.89
  -2  -8  21    6.76    6.76
   2   8 -20   15.78    7.89
  -2  -8  20   11.27    6.76
   2   8 -19    1.13    4.51
  -2  -8  19   -6.76    5.64
   2   8 -18  774.27   24.79
  -2  -8  18  767.51   20.29
   2   8 -17    5.64    4.51
  -2  -8  17    5.64    5.64
   2   8 -16  250.20   11.27
  -2  -8  16  254.71   12.40
   2   8 -15   11.27    3.38
  -2  -8  15   -3.38    6.76
   2   8 -14  765.25   24.79
  -2  -8  14  806.95   32.68
   2   8 -13   74.38    5.64
  -2  -8  13   77.76    6.76
   2   8 -12  245.69   12.40
  -2  -8  12  236.68   14.65
   2   8 -11    2.25    4.51
  -2  -8  11   12.40    7.89
   2   8 -10  936.56   27.05
  -2  -8  10  937.69   27.05
   2   8  -9   14.65    5.64
  -2  -8   9   11.27    3.38
   2   8  -8   74.38    7.89
  -2  -8   8   71.00    3.38
  -2  -8   7   18.03    4.51
  -2  -8   6 2592.17   56.35
  -2  -8   5  232.17    9.02
  -2  -8   4   95.80    4.51
  -2  -8   3  107.07    6.76
   2   8  -2  349.38   19.16
  -2  -8   2  424.89   12.40
  -2  -8   1   19.16    3.38
   2   8   0  306.55   15.78
  -2  -8   0  268.23   11.27
   2   8   1  421.51   19.16
  -2  -8  -1  380.94   14.65
   2   8   2 1181.13   46.21
  -2  -8  -2  969.24   34.94
   2   8   3    6.76    5.64
  -2  -8  -3   -5.64    3.38
   2   8   4  508.29   22.54
  -2  -8  -4  521.81   25.92
   2   8   5  888.10   36.06
  -2  -8  -5  947.83   40.57
   2   8   6 1308.48   51.84
  -2  -8  -6 1300.59   49.59
   2   8   7   76.64   11.27
  -2  -8  -7   73.26    9.02
   2   8   8  865.56   34.94
  -2  -8  -8 1150.70   59.73
   2   8   9  -29.30   25.92
  -2  -8  -9   31.56    7.89
   2   8  10  838.51   41.70
  -2  -8 -10  827.24   24.79
   2   8  11    0.00    6.76
  -2  -8 -11   -3.38    4.51
   2   8  12  774.27   40.57
  -2  -8 -12  788.92   23.67
   2   8  13    0.00    6.76
  -2  -8 -13    0.00    6.76
   2   8  14  489.13   27.05
  -2  -8 -14  458.70   16.91
   2   8  15  -12.40    9.02
  -2  -8 -15   12.40    5.64
   2   8  16  667.20   36.06
  -2  -8 -16  630.01   16.91
   2   8  17   10.14   13.52
  -2  -8 -17    2.25    4.51
   2   8  18  189.34   11.27
  -2  -8 -18  184.83    9.02
   2   8  19   -7.89   10.14
  -2  -8 -19    1.13    4.51
   2   8  20  378.68   18.03
  -2  -8 -20  348.25   11.27
   2   8  21    9.02   10.14
  -2  -8 -21    7.89    6.76
   2   8  22  132.99   19.16
  -2  -8 -22  140.88   10.14
   2   8  23   -2.25   14.65
  -2  -8 -23    9.02   10.14
  -2  -8 -24  262.60   23.67
  -2  -9  24  295.28   20.29
  -2  -9  23   13.52    9.02
   2   9 -22   45.08   10.14
  -2  -9  22   45.08    9.02
   2   9 -21   18.03    7.89
  -2  -9  21    9.02    7.89
   2   9 -20  565.77   20.29
  -2  -9  20  526.32   16.91
   2   9 -19   28.18    6.76
  -2  -9  19   28.18    5.64
   2   9 -18   10.14    6.76
  -2  -9  18   21.41    5.64
   2   9 -17   22.54    6.76
  -2  -9  17    9.02    7.89
   2   9 -16  715.66   22.54
  -2  -9  16  777.65   28.18
   2   9 -15   13.52    5.64
  -2  -9  15    9.02    5.64
   2   9 -14  185.96    9.02
  -2  -9  14  179.20   10.14
   2   9 -13   27.05    5.64
  -2  -9  13   22.54    9.02
   2   9 -12 1195.78   34.94
  -2  -9  12 1165.35   33.81
   2   9 -11   65.37    5.64
  -2  -9  11   57.48    5.64
   2   9 -10   98.05   10.14
  -2  -9  10  117.21    5.64
   2   9  -9   -1.13    5.64
  -2  -9   9    5.64    3.38
   2   9  -8 1445.98   54.10
  -2  -9   8 1417.80   32.68
  -2  -9   7   55.22    5.64
  -2  -9   6  308.81   10.14
  -2  -9   5    0.00    3.38
  -2  -9   4 1275.80   34.94
  -2  -9   3  172.44    6.76
   2   9  -2  120.59   10.14
  -2  -9   2  131.86    6.76
  -2  -9   1  208.50    9.02
   2   9   0  895.99   31.56
  -2  -9   0 1021.09   29.30
   2   9   1  349.38   18.03
  -2  -9  -1  341.49   14.65
   2   9   2  957.97   38.32
  -2  -9  -2  828.37   30.43
   2   9   3  675.09   28.18
  -2  -9  -3  670.58   31.56
   2   9   4 1469.65   58.61
  -2  -9  -4 1488.81   57.48
   2   9   5   22.54    6.76
  -2  -9  -5   20.29    7.89
   2   9   6  888.10   36.06
  -2  -9  -6  986.15   55.22
   2   9   7  134.12   11.27
  -2  -9  -7  137.50   14.65
   2   9   8  546.61   41.70
  -2  -9  -8  552.24   28.18
   2   9   9   74.38   10.14
  -2  -9  -9   81.15   10.14
   2   9  10  294.15   20.29
  -2  -9 -10  267.11   19.16
   2   9  11   72.13   11.27
  -2  -9 -11   61.99    6.76
   2   9  12  466.59   22.54
  -2  -9 -12  469.97   16.91
   2   9  13   64.24    9.02
  -2  -9 -13   57.48    7.89
   2   9  14  314.44   19.16
  -2  -9 -14  346.00   14.65
   2   9  15  -11.27    6.76
  -2  -9 -15    5.64    7.89
   2   9  16  193.85   15.78
  -2  -9 -16  182.58    9.02
   2   9  17   90.16   19.16
  -2  -9 -17   82.27    6.76
   2   9  18  325.71   16.91
  -2  -9 -18  322.33   11.27
   2   9  19   -1.13    9.02
  -2  -9 -19   -3.38    5.64
   2   9  20  171.31   20.29
  -2  -9 -20  147.64    9.02
   2   9  21   50.72   12.40
  -2  -9 -21   40.57    9.02
   2   9  22  191.59   23.67
  -2  -9 -22  182.58   13.52
   2   9  23   34.94   13.52
  -2  -9 -23   32.68    9.02
  -2 -10  24   23.67   11.27
  -2 -10  23   64.24   11.27
  -2 -10  22  349.38   16.91
   2  10 -21   65.37    9.02
  -2 -10  21   92.42   11.27
   2  10 -20   41.70    7.89
  -2 -10  20   37.19    6.76
   2  10 -19  108.19   11.27
  -2 -10  19  113.83   10.14
   2  10 -18  448.56   18.03
  -2 -10  18  424.89   16.91
   2  10 -17  442.92   16.91
  -2 -10  17  405.73   13.52
   2  10 -16   30.43    6.76
  -2 -10  16   36.06    4.51
   2  10 -15    3.38    5.64
  -2 -10  15    7.89    5.64
   2  10 -14  997.42   30.43
  -2 -10  14 1024.47   27.05
   2  10 -13  267.11   11.27
  -2 -10  13  268.23    7.89
   2  10 -12  149.89   12.40
  -2 -10  12  137.50    6.76
   2  10 -11   72.13   10.14
  -2 -10  11  105.94    6.76
   2  10 -10  721.30   33.81
  -2 -10  10  735.95   20.29
   2  10  -9  460.95   22.54
  -2 -10   9  436.16   12.40
   2  10  -8   27.05    5.64
  -2 -10   8   33.81    4.51
   2  10  -7    4.51    4.51
  -2 -10   7    1.13    4.51
  -2 -10   6 1642.08   36.06
  -2 -10   5 1016.58   28.18
  -2 -10   4   22.54    4.51
   2  10  -3   27.05    5.64
  -2 -10   3   31.56    4.51
   2  10  -2  893.73   47.34
  -2 -10   2 1063.92   29.30
  -2 -10   1  273.87   13.52
  -2 -10   0   10.14    4.51
   2  10   1   45.08    9.02
  -2 -10  -1   61.99    7.89
   2  10   2  624.37   40.57
  -2 -10  -2  557.88   25.92
   2  10   3 2018.51   75.51
  -2 -10  -3 1799.86   85.65
   2  10   4  235.55   15.78
  -2 -10  -4  313.31   22.54
   2  10   5    0.00    4.51
  -2 -10  -5   -4.51    6.76
   2  10   6  704.39   31.56
  -2 -10  -6  678.47   34.94
   2  10   7  608.60   20.29
  -2 -10  -7  598.45   30.43
   2  10   8  329.09   28.18
  -2 -10  -8  277.25   18.03
   2  10   9   -9.02    6.76
  -2 -10  -9  -14.65    7.89
   2  10  10  207.37   15.78
  -2 -10 -10  198.36   16.91
   2  10  11  338.11   19.16
  -2 -10 -11  346.00   13.52
   2  10  12  264.85   18.03
  -2 -10 -12  280.63   11.27
   2  10  13   10.14    7.89
  -2 -10 -13   15.78    5.64
   2  10  14  302.04   16.91
  -2 -10 -14  312.19   13.52
   2  10  15  335.85   15.78
  -2 -10 -15  329.09   11.27
   2  10  16  286.27   16.91
  -2 -10 -16  305.42   12.40
   2  10  17   72.13    9.02
  -2 -10 -17   75.51    7.89
   2  10  18  134.12   11.27
  -2 -10 -18  118.34    7.89
   2  10  19  199.48   18.03
  -2 -10 -19  179.20    7.89
   2  10  20  178.07   20.29
  -2 -10 -20  155.53   10.14
   2  10  21    4.51   11.27
  -2 -10 -21   12.40   10.14
   2  10  22   99.18   16.91
  -2 -10 -22   80.02   13.52
   2  10  23  140.88   18.03
  -2 -10 -23  132.99   11.27
  -2 -11  24   86.78   20.29
  -2 -11  23  234.42   15.78
  -2 -11  22   15.78    9.02
   2  11 -21  153.28   11.27
  -2 -11  21  154.40   10.14
   2  11 -20  155.53   10.14
  -2 -11  20  149.89   10.14
   2  11 -19  222.02   11.27
  -2 -11  19  209.63   10.14
   2  11 -18   21.41    6.76
  -2 -11  18   10.14    4.51
   2  11 -17  223.15   11.27
  -2 -11  17  219.77    9.02
   2  11 -16  288.52   12.40
  -2 -11  16  291.90   10.14
   2  11 -15  668.33   21.41
  -2 -11  15  657.06   15.78
   2  11 -14   50.72    9.02
  -2 -11  14   56.35    5.64
   2  11 -13   75.51   11.27
  -2 -11  13   89.04    5.64
   2  11 -12  564.64   25.92
  -2 -11  12  577.04   14.65
   2  11 -11 1332.15   56.35
  -2 -11  11 1430.20   30.43
   2  11 -10   29.30    6.76
  -2 -11  10   28.18    4.51
   2  11  -9  113.83   10.14
  -2 -11   9  108.19    6.76
  -2 -11   8  197.23    7.89
   2  11  -7 1037.99   42.83
  -2 -11   7 1033.49   24.79
  -2 -11   6    4.51    3.38
  -2 -11   5    2.25    3.38
  -2 -11   4  527.45   15.78
  -2 -11   3 1264.53   46.21
  -2 -11   2  174.69    7.89
  -2 -11   1   19.16    4.51
  -2 -11   0  444.05   27.05
  -2 -11  -1 2097.40   55.22
  -2 -11  -2    4.51    4.51
   2  11   3    7.89    7.89
  -2 -11  -3   14.65    4.51
   2  11   4  138.62    9.02
  -2 -11  -4  116.08   11.27
   2  11   5 2004.98   78.89
  -2 -11  -5 1989.21  116.08
   2  11   6   48.46    9.02
   2  11   7   38.32    7.89
  -2 -11  -7   30.43    5.64
   2  11   8  165.67   24.79
  -2 -11  -8  149.89   14.65
   2  11   9  543.23   19.16
  -2 -11  -9  445.18   39.45
   2  11  10  167.93   13.52
  -2 -11 -10  155.53   15.78
   2  11  11    1.13    5.64
  -2 -11 -11   -9.02    6.76
   2  11  12   51.84   10.14
  -2 -11 -12   46.21    5.64
   2  11  13  628.88   24.79
  -2 -11 -13  662.69   19.16
   2  11  14   80.02   11.27
  -2 -11 -14  128.48    7.89
   2  11  15   20.29    6.76
  -2 -11 -15   12.40    6.76
   2  11  16   31.56   16.91
  -2 -11 -16   29.30    6.76
   2  11  17  210.75   16.91
  -2 -11 -17  229.91   12.40
  -2 -11 -18   52.97    5.64
  -2 -11 -19   12.40    5.64
   2  11  20   31.56   16.91
  -2 -11 -20   25.92   10.14
   2  11  21  255.84   23.67
  -2 -11 -21  220.90   14.65
   2  11  22   24.79   12.40
  -2 -11 -22   28.18    9.02
  -2 -11 -23   54.10   23.67
  -2 -12  23   85.65   10.14
  -2 -12  22   15.78    9.02
   2  12 -21  260.34   18.03
  -2 -12  21  244.57   13.52
   2  12 -20   -5.64    6.76
  -2 -12  20   -2.25   13.52
   2  12 -19  123.97   11.27
  -2 -12  19  122.85    9.02
   2  12 -18   91.29   10.14
  -2 -12  18   74.38    7.89
   2  12 -17  513.93   25.92
  -2 -12  17  504.91   15.78
   2  12 -16   77.76   11.27
  -2 -12  16   66.49    6.76
   2  12 -15   91.29   12.40
  -2 -12  15   82.27    6.76
   2  12 -14   82.27    9.02
  -2 -12  14   90.16    6.76
   2  12 -13 1342.29   54.10
  -2 -12  13 1309.61   28.18
   2  12 -12   10.14    7.89
  -2 -12  12    4.51    4.51
  -2 -12  11  100.31    6.76
  -2 -12  10   23.67    4.51
  -2 -12   9 1175.49   27.05
  -2 -12   8    2.25    4.51
   2  12  -7   91.29    9.02
  -2 -12   7   81.15    5.64
  -2 -12   6   -4.51    3.38
  -2 -12   5 1487.68   33.81
  -2 -12   4   14.65    5.64
  -2 -12   3   45.08    4.51
  -2 -12   2  162.29   12.40
  -2 -12   1 1670.26   52.97
  -2 -12   0  117.21    7.89
  -2 -12  -1   61.99    6.76
  -2 -12  -2   11.27    4.51
   2  12   3 1531.63   46.21
  -2 -12  -3 1530.51   47.34
   2  12   4    0.00    5.64
  -2 -12  -4   25.92    9.02
   2  12   5   37.19   10.14
  -2 -12  -5   32.68    7.89
   2  12   6  -12.40    5.64
  -2 -12  -6    5.64    4.51
   2  12   7 1402.02   41.70
  -2 -12  -7 1374.98   41.70
   2  12   8   66.49   11.27
  -2 -12  -8   59.73   11.27
   2  12   9    4.51    5.64
  -2 -12  -9   -2.25    6.76
   2  12  10   -2.25    6.76
  -2 -12 -10   -2.25    6.76
   2  12  11 1096.60   36.06
  -2 -12 -11 1087.58   34.94
   2  12  12   13.52    7.89
  -2 -12 -12    1.13    4.51
   2  12  13    9.02    6.76
  -2 -12 -13    4.51    5.64
   2  12  14   -6.76    5.64
  -2 -12 -14   -5.64    5.64
   2  12  15  534.21   23.67
  -2 -12 -15  529.70   20.29
   2  12  16  -10.14   12.40
  -2 -12 -16   -3.38    5.64
   2  12  17   43.95   14.65
  -2 -12 -17    9.02    9.02
   2  12  18  -16.91   18.03
  -2 -12 -18    3.38    6.76
   2  12  19  428.27   27.05
  -2 -12 -19  445.18   19.16
   2  12  20   10.14   12.40
  -2 -12 -20   -2.25    6.76
   2  12  21   34.94   16.91
  -2 -12 -21    3.38    9.02
   2  12  22  -13.52   12.40
  -2 -12 -22    4.51   10.14
  -2 -13  23  128.48   13.52
  -2 -13  22    4.51    9.02
   2  13 -21   94.67   11.27
  -2 -13  21  132.99   21.41
   2  13 -20    9.02   11.27
  -2 -13  20   -7.89   11.27
   2  13 -19  404.60   23.67
  -2 -13  19  412.49   20.29
   2  13 -18  -14.65   10.14
  -2 -13  18   13.52    6.76
   2  13 -17  149.89   13.52
  -2 -13  17  155.53   10.14
   2  13 -16   41.70    9.02
  -2 -13  16   42.83    7.89
   2  13 -15  601.83   28.18
  -2 -13  15  582.67   14.65
   2  13 -14  -25.92   10.14
  -2 -13  14    3.38    4.51
   2  13 -13   14.65    7.89
  -2 -13  13   39.45    4.51
   2  13 -12   45.08    9.02
  -2 -13  12   30.43    4.51
  -2 -13  11 1112.38   23.67
  -2 -13  10   31.56    6.76
  -2 -13   9  249.07   10.14
  -2 -13   8   61.99    5.64
  -2 -13   7 1113.50   27.05
  -2 -13   6   -2.25    4.51
  -2 -13   5   21.41    5.64
  -2 -13   4   86.78    6.76
  -2 -13   3 1222.83   29.30
  -2 -13   2    6.76    5.64
   2  13  -1    2.25    5.64
  -2 -13   1   -2.25    4.51
   2  13   0   66.49   10.14
  -2 -13   0   57.48    7.89
  -2 -13  -1  773.14   25.92
   2  13   2   32.68    7.89
  -2 -13  -2   28.18    4.51
   2  13   3  130.74   14.65
  -2 -13  -3  118.34    7.89
   2  13   4  246.82   12.40
  -2 -13  -4  238.93   15.78
   2  13   5 1017.71   31.56
  -2 -13  -5  994.04   37.19
   2  13   6   37.19    6.76
  -2 -13  -6   32.68    6.76
   2  13   7   22.54    6.76
  -2 -13  -7   25.92    6.76
   2  13   8  184.83   12.40
  -2 -13  -8  167.93   11.27
   2  13   9  628.88   22.54
  -2 -13  -9  628.88   22.54
   2  13  10  -10.14    7.89
  -2 -13 -10    7.89    6.76
   2  13  11    6.76    7.89
  -2 -13 -11   -5.64    7.89
   2  13  12   43.95    9.02
  -2 -13 -12   31.56    7.89
   2  13  13  609.72   23.67
  -2 -13 -13  604.09   18.03
   2  13  14   14.65   10.14
  -2 -13 -14   34.94    6.76
   2  13  15   21.41   10.14
  -2 -13 -15   40.57    6.76
   2  13  16   30.43   13.52
  -2 -13 -16   11.27    6.76
   2  13  17  463.21   31.56
  -2 -13 -17  422.64   16.91
   2  13  18   21.41   15.78
  -2 -13 -18   -6.76   13.52
   2  13  19   -4.51   15.78
  -2 -13 -19    3.38   15.78
   2  13  20   30.43   12.40
  -2 -13 -20    7.89    7.89
   2  13  21  272.74   22.54
  -2 -13 -21  256.96   16.91
   2  13  22   39.45   18.03
  -2 -13 -22    4.51   15.78
  -2 -14  23    6.76   19.16
  -2 -14  22  110.45   12.40
  -2 -14  21  267.11   27.05
   2  14 -20   -2.25    9.02
  -2 -14  20   -6.76   15.78
   2  14 -19   49.59   10.14
  -2 -14  19   38.32   12.40
   2  14 -18   93.54   11.27
  -2 -14  18   73.26    9.02
   2  14 -17  260.34   16.91
  -2 -14  17  252.45   12.40
  -2 -14  16   58.61   10.14
   2  14 -15   76.64   14.65
  -2 -14  15  109.32    6.76
   2  14 -14  142.01   12.40
  -2 -14  14  146.51    6.76
   2  14 -13  315.57   19.16
  -2 -14  13  279.50   10.14
   2  14 -12   25.92    7.89
  -2 -14  12   30.43    4.51
   2  14 -11   60.86   10.14
  -2 -14  11   59.73   10.14
  -2 -14  10  288.52   11.27
  -2 -14   9  264.85   12.40
  -2 -14   8    9.02    4.51
  -2 -14   7    6.76    5.64
  -2 -14   6  472.23   15.78
  -2 -14   5  613.10   18.03
  -2 -14   4  215.26    9.02
  -2 -14   3   12.40    4.51
  -2 -14   2  232.17   10.14
  -2 -14   1  547.74   28.18
   2  14   0   94.67   12.40
  -2 -14   0   91.29    6.76
  -2 -14  -1   56.35    6.76
   2  14   2  569.15   30.43
  -2 -14  -2  571.40   15.78
   2  14   3  615.36   29.30
  -2 -14  -3  581.55   16.91
   2  14   4  190.47   24.79
  -2 -14  -4  167.93   10.14
   2  14   5   -1.13    7.89
  -2 -14  -5   33.81    5.64
   2  14   6  680.73   23.67
  -2 -14  -6  645.79   23.67
   2  14   7  613.10   22.54
  -2 -14  -7  599.58   22.54
   2  14   8   75.51    9.02
  -2 -14  -8   51.84    9.02
   2  14   9    4.51    6.76
  -2 -14  -9   -5.64    6.76
   2  14  10  224.28   16.91
  -2 -14 -10  237.80   14.65
   2  14  11  380.94   18.03
  -2 -14 -11  326.84   18.03
   2  14  12   36.06    7.89
  -2 -14 -12   40.57    9.02
   2  14  13    6.76    7.89
  -2 -14 -13   -2.25    7.89
   2  14  14  121.72   12.40
  -2 -14 -14   94.67    9.02
   2  14  15  401.22   24.79
  -2 -14 -15  369.67   13.52
   2  14  16  167.93   16.91
  -2 -14 -16  136.37   10.14
   2  14  17   19.16   12.40
  -2 -14 -17  -14.65   10.14
   2  14  18    5.64   11.27
  -2 -14 -18  -47.34   19.16
   2  14  19  329.09   25.92
  -2 -14 -19  290.77   24.79
   2  14  20   47.34   18.03
  -2 -14 -20   47.34   11.27
   2  14  21   29.30   18.03
  -2 -14 -21   15.78   11.27
  -2 -15  22  -20.29   19.16
  -2 -15  21    7.89   19.16
   2  15 -20  268.23   20.29
  -2 -15  20  287.39   25.92
   2  15 -19  121.72   15.78
  -2 -15  19  123.97   16.91
   2  15 -18    5.64   12.40
  -2 -15  18   21.41   12.40
  -2 -15  17   29.30    9.02
  -2 -15  16  405.73   15.78
   2  15 -15  100.31   12.40
  -2 -15  15   75.51    7.89
   2  15 -14   95.80   11.27
  -2 -15  14   95.80    7.89
   2  15 -13  105.94   12.40
  -2 -15  13  100.31    6.76
   2  15 -12  607.47   29.30
  -2 -15  12  586.05   14.65
   2  15 -11   73.26   10.14
  -2 -15  11   91.29    7.89
   2  15 -10   50.72    9.02
  -2 -15  10   34.94    5.64
  -2 -15   9   29.30    5.64
  -2 -15   8 1315.24   27.05
  -2 -15   7  217.52    9.02
  -2 -15   6   91.29    6.76
  -2 -15   5   81.15    5.64
  -2 -15   4  556.75   14.65
  -2 -15   3  309.93   10.14
  -2 -15   2  367.41   12.40
  -2 -15   1    4.51    5.64
   2  15   0  799.06   37.19
  -2 -15   0  750.60   25.92
  -2 -15  -1  125.10    7.89
   2  15   2   41.70   10.14
  -2 -15  -2   51.84    5.64
   2  15   3   16.91    9.02
  -2 -15  -3   11.27    5.64
   2  15   4  652.55   32.68
  -2 -15  -4  622.12   16.91
   2  15   5   49.59   13.52
  -2 -15  -5   20.29    6.76
   2  15   6  137.50   12.40
  -2 -15  -6  167.93    9.02
   2  15   7    1.13    5.64
  -2 -15  -7    0.00    6.76
   2  15   8  234.42   13.52
  -2 -15  -8  240.06   13.52
   2  15   9   67.62    9.02
  -2 -15  -9   58.61   11.27
   2  15  10  187.09   13.52
  -2 -15 -10  155.53   15.78
   2  15  11   31.56    7.89
  -2 -15 -11   23.67   10.14
   2  15  12  268.23   18.03
  -2 -15 -12  268.23   15.78
   2  15  13   40.57   11.27
  -2 -15 -13   60.86    6.76
   2  15  14  330.22   22.54
  -2 -15 -14  309.93   13.52
   2  15  15    7.89   10.14
  -2 -15 -15   -3.38    9.02
   2  15  16  179.20   21.41
  -2 -15 -16  166.80   14.65
   2  15  17  131.86   20.29
  -2 -15 -17  142.01   20.29
   2  15  18  201.74   22.54
  -2 -15 -18  201.74   25.92
   2  15  19   -2.25   11.27
  -2 -15 -19   13.52   15.78
   2  15  20   91.29   16.91
  -2 -15 -20  129.61   24.79
   2  15  21   55.22   18.03
  -2 -15 -21   54.10   19.16
  -2 -16  21   10.14   13.52
   2  16 -20   25.92   13.52
  -2 -16  20   29.30   13.52
   2  16 -19    7.89   12.40
  -2 -16  19    7.89   19.16
   2  16 -18  348.25   22.54
  -2 -16  18  386.57   30.43
  -2 -16  17  -12.40   11.27
   2  16 -16   33.81    9.02
  -2 -16  16   24.79    7.89
   2  16 -15   -1.13    7.89
  -2 -16  15    4.51    5.64
   2  16 -14  557.88   29.30
  -2 -16  14  503.78   16.91
   2  16 -13    4.51    7.89
  -2 -16  13    9.02    5.64
   2  16 -12  103.69   14.65
  -2 -16  12   81.15    7.89
   2  16 -11   18.03    9.02
  -2 -16  11   11.27    5.64
  -2 -16  10  469.97   12.40
  -2 -16   9   11.27    5.64
  -2 -16   8  130.74    7.89
  -2 -16   7   -2.25    5.64
  -2 -16   6  325.71   10.14
  -2 -16   5  -11.27    6.76
  -2 -16   4  216.39    9.02
  -2 -16   3  227.66    9.02
  -2 -16   2 1037.99   22.54
  -2 -16   1    6.76    5.64
   2  16   0  391.08   23.67
  -2 -16   0  385.44   12.40
   2  16   1  -14.65    7.89
  -2 -16  -1   -7.89    5.64
  -2 -16  -2 1023.34   25.92
   2  16   3   28.18   10.14
  -2 -16  -3   38.32    6.76
   2  16   4   42.83   11.27
  -2 -16  -4   40.57    6.76
   2  16   5   12.40    9.02
  -2 -16  -5   -1.13    5.64
   2  16   6  901.62   40.57
  -2 -16  -6  853.16   25.92
   2  16   7   15.78   11.27
  -2 -16  -7   11.27    6.76
   2  16   8  247.95   14.65
  -2 -16  -8  226.53   12.40
   2  16   9   18.03    7.89
  -2 -16  -9   13.52    6.76
   2  16  10  539.85   20.29
  -2 -16 -10  495.89   21.41
   2  16  11   -1.13   13.52
  -2 -16 -11    7.89    7.89
   2  16  12  240.06   21.41
  -2 -16 -12  228.79   15.78
   2  16  13    9.02   10.14
  -2 -16 -13  -20.29   14.65
   2  16  14  245.69   21.41
  -2 -16 -14  229.91   16.91
   2  16  15  -12.40   14.65
  -2 -16 -15  -10.14   18.03
   2  16  16  314.44   25.92
  -2 -16 -16  297.54   25.92
  -2 -16 -17  -27.05   18.03
   2  16  18  128.48   21.41
  -2 -16 -18  148.77   21.41
   2  16  19  -15.78   16.91
  -2 -16 -19  -14.65   20.29
   2  16  20  198.36   23.67
  -2 -16 -20  148.77   28.18
  -2 -17  21    7.89   13.52
  -2 -17  20  386.57   32.68
   2  17 -19    1.13    9.02
  -2 -17  19   25.92   20.29
   2  17 -18   31.56   13.52
  -2 -17  18   42.83   14.65
   2  17 -17   27.05   10.14
  -2 -17  17   15.78   13.52
   2  17 -16  420.38   24.79
  -2 -17  16  476.73   23.67
   2  17 -15   85.65   15.78
  -2 -17  15   80.02   13.52
   2  17 -14   51.84   14.65
  -2 -17  14   37.19    7.89
   2  17 -13   -1.13    9.02
  -2 -17  13  -11.27    6.76
  -2 -17  12  676.22   20.29
  -2 -17  11  127.35    9.02
  -2 -17  10   48.46    6.76
  -2 -17   9   34.94    5.64
  -2 -17   8  460.95   13.52
  -2 -17   7  155.53    7.89
  -2 -17   6  172.44    7.89
  -2 -17   5   18.03    6.76
  -2 -17   4  743.84   16.91
  -2 -17   3  160.04    7.89
  -2 -17   2  433.91   15.78
  -2 -17   1  -11.27    5.64
  -2 -17   0  909.51   24.79
   2  17   1  218.64   20.29
  -2 -17  -1  201.74    9.02
  -2 -17  -2  336.98   13.52
   2  17   3   25.92   13.52
  -2 -17  -3    2.25    6.76
   2  17   4  920.78   43.95
  -2 -17  -4  894.86   24.79
   2  17   5  137.50   16.91
  -2 -17  -5  152.15   10.14
   2  17   6   46.21   14.65
  -2 -17  -6   73.26   11.27
   2  17   7   14.65   14.65
  -2 -17  -7   28.18    7.89
   2  17   8  482.37   28.18
  -2 -17  -8  439.54   19.16
   2  17   9   34.94   25.92
  -2 -17  -9   72.13   11.27
   2  17  10  304.30   16.91
  -2 -17 -10  311.06   13.52
   2  17  11   -1.13   10.14
  -2 -17 -11   -1.13   11.27
   2  17  12  299.79   24.79
  -2 -17 -12  273.87   15.78
   2  17  13   91.29   18.03
  -2 -17 -13   69.88   11.27
   2  17  14  190.47   19.16
  -2 -17 -14  209.63   29.30
   2  17  15   14.65   12.40
  -2 -17 -15   23.67   14.65
   2  17  16  167.93   20.29
  -2 -17 -16  155.53   25.92
   2  17  17   94.67   21.41
  -2 -17 -17   63.11   18.03
   2  17  18  157.78   22.54
   2  17  19   10.14   12.40
  -2 -17 -19   11.27   21.41
  -2 -18  20   24.79   15.78
   2  18 -19   10.14   11.27
  -2 -18  19   11.27    9.02
   2  18 -18  197.23   18.03
  -2 -18  18  182.58   14.65
   2  18 -17  109.32   15.78
  -2 -18  17  111.58   11.27
   2  18 -16   57.48   12.40
  -2 -18  16   52.97   10.14
  -2 -18  15   51.84   10.14
  -2 -18  14  349.38   14.65
  -2 -18  13  208.50   11.27
  -2 -18  12   49.59   10.14
  -2 -18  11   76.64    7.89
  -2 -18  10  317.82   12.40
  -2 -18   9  222.02   10.14
  -2 -18   8  117.21    7.89
  -2 -18   7    9.02    5.64
  -2 -18   6  587.18   14.65
  -2 -18   5  405.73   12.40
  -2 -18   4  157.78    7.89
  -2 -18   3    7.89    6.76
  -2 -18   2  760.74   24.79
  -2 -18   1  382.06   12.40
  -2 -18   0  158.91    7.89
  -2 -18  -1   -2.25    5.64
   2  18   2  405.73   28.18
  -2 -18  -2  401.22   15.78
  -2 -18  -3  627.76   23.67
  -2 -18  -4  132.99   11.27
   2  18   5  -49.59   19.16
  -2 -18  -5   -2.25    6.76
   2  18   6  373.05   24.79
  -2 -18  -6  386.57   14.65
   2  18   7  238.93   20.29
  -2 -18  -7  233.29   11.27
   2  18   8  107.07   43.95
  -2 -18  -8  125.10   14.65
   2  18   9  -59.73   38.32
  -2 -18  -9   -2.25   16.91
   2  18  10  156.66   18.03
  -2 -18 -10  147.64   12.40
   2  18  11  194.98   24.79
  -2 -18 -11  201.74   22.54
   2  18  12  245.69   20.29
  -2 -18 -12  275.00   25.92
   2  18  13    9.02   12.40
  -2 -18 -13  -11.27   12.40
   2  18  14  123.97   20.29
  -2 -18 -14  111.58   18.03
   2  18  15  223.15   22.54
  -2 -18 -15  206.25   27.05
   2  18  16  197.23   20.29
  -2 -18 -16  164.55   22.54
   2  18  17   -6.76   12.40
  -2 -18 -17   39.45   23.67
   2  18  18   78.89   14.65
  -2 -18 -18   78.89   21.41
  -2 -19  19  207.37   22.54
  -2 -19  18    9.02    7.89
  -2 -19  17   98.05   14.65
  -2 -19  16  162.29   14.65
  -2 -19  15  297.54   18.03
  -2 -19  14   16.91    9.02
  -2 -19  13   56.35    7.89
  -2 -19  12  247.95   12.40
  -2 -19  11  256.96   12.40
  -2 -19  10   52.97    9.02
  -2 -19   9  104.81    7.89
  -2 -19   8  197.23    9.02
  -2 -19   7  573.66   15.78
  -2 -19   6   34.94    6.76
  -2 -19   5   25.92    7.89
  -2 -19   4  428.27   14.65
  -2 -19   3  714.54   18.03
  -2 -19   2   50.72    6.76
  -2 -19   1   -2.25    5.64
  -2 -19   0  138.62    7.89
  -2 -19  -1  749.47   22.54
  -2 -19  -2  169.05   14.65
  -2 -19  -3    2.25    6.76
   2  19   4  165.67   20.29
  -2 -19  -4  171.31   11.27
   2  19   5  724.68   41.70
  -2 -19  -5  679.60   20.29
   2  19   6   77.76   13.52
  -2 -19  -6   77.76   19.16
   2  19   7    7.89   11.27
  -2 -19  -7   11.27    7.89
   2  19   8  102.56   19.16
  -2 -19  -8  119.47   19.16
   2  19   9  424.89   27.05
  -2 -19  -9  446.30   30.43
   2  19  10  102.56   15.78
  -2 -19 -10   82.27   18.03
   2  19  11   -2.25   11.27
  -2 -19 -11  -10.14   12.40
   2  19  12   33.81   18.03
  -2 -19 -12   56.35   15.78
   2  19  13  210.75   21.41
  -2 -19 -13  309.93   28.18
   2  19  14   42.83   12.40
  -2 -19 -14   51.84   15.78
   2  19  15    5.64   12.40
  -2 -19 -15    1.13   14.65
   2  19  16   21.41   18.03
  -2 -19 -16   55.22   23.67
   2  19  17  271.61   27.05
  -2 -19 -17  234.42   24.79
   2  19  18   25.92   20.29
  -2 -20  18    1.13   11.27
  -2 -20  17  267.11   18.03
  -2 -20  16   -2.25   12.40
  -2 -20  15   75.51   11.27
  -2 -20  14   12.40    9.02
  -2 -20  13  275.00   15.78
  -2 -20  12  -10.14   14.65
  -2 -20  11   50.72    9.02
  -2 -20  10   15.78    9.02
  -2 -20   9  340.36   14.65
  -2 -20   8   -6.76    7.89
  -2 -20   7   30.43    9.02
  -2 -20   6   18.03    7.89
  -2 -20   5  507.16   21.41
  -2 -20   4   19.16    7.89
  -2 -20   3   59.73   11.27
  -2 -20   2   65.37    7.89
  -2 -20   1  664.95   20.29
  -2 -20   0   20.29    9.02
  -2 -20  -1   -3.38    9.02
  -2 -20  -2    9.02    7.89
  -2 -20  -3  651.42   25.92
   2  20   4   18.03   15.78
  -2 -20  -4    5.64    7.89
   2  20   5   32.68   12.40
  -2 -20  -5   41.70   18.03
   2  20   6    6.76   11.27
  -2 -20  -6   21.41   18.03
   2  20   7  504.91   30.43
  -2 -20  -7  298.66  149.89
   2  20   8   48.46   16.91
  -2 -20  -8   28.18   13.52
   2  20   9   12.40   11.27
  -2 -20  -9  -30.43   14.65
   2  20  10   -3.38   16.91
  -2 -20 -10    0.00   19.16
   2  20  11  374.17   24.79
  -2 -20 -11  347.12   25.92
   2  20  12   19.16   12.40
  -2 -20 -12    9.02   14.65
   2  20  13   11.27   19.16
  -2 -20 -13    6.76   21.41
   2  20  14   -4.51   13.52
  -2 -20 -14  -11.27   21.41
   2  20  15  282.88   41.70
  -2 -20 -15  419.25   32.68
   2  20  16    0.00   14.65
  -2 -20 -16  -19.16   23.67
   2  20  17    4.51   13.52
  -2 -20 -17    7.89   24.79
  -2 -21  17   85.65   13.52
  -2 -21  16   23.67   13.52
  -2 -21  15  210.75   21.41
  -2 -21  14   12.40   10.14
  -2 -21  13  129.61   11.27
  -2 -21  12   16.91   12.40
  -2 -21  11  440.67   19.16
  -2 -21  10    5.64   10.14
  -2 -21   9   16.91   10.14
  -2 -21   8   -5.64   10.14
  -2 -21   7  294.15   15.78
  -2 -21   6    1.13    9.02
  -2 -21   5   28.18   18.03
  -2 -21   4    2.25   14.65
  -2 -21   3  477.86   20.29
  -2 -21   2   40.57   13.52
  -2 -21   1   20.29   12.40
  -2 -21   0   10.14   10.14
  -2 -21  -1  728.06   27.05
  -2 -21  -2   -3.38   10.14
  -2 -21  -3   24.79   11.27
  -2 -21  -4   13.52   12.40
   2  21   5  599.58   36.06
  -2 -21  -5  605.21   24.79
   2  21   6   27.05   11.27
  -2 -21  -6   -4.51   21.41
   2  21   7   20.29   16.91
  -2 -21  -7   27.05   13.52
   2  21   8    0.00   12.40
  -2 -21  -8    3.38   12.40
   2  21   9  342.62   25.92
  -2 -21  -9  379.81   30.43
   2  21  10    6.76   13.52
  -2 -21 -10   16.91   20.29
   2  21  11    1.13   18.03
  -2 -21 -11   -4.51   21.41
   2  21  12   -6.76   12.40
  -2 -21 -12    3.38   16.91
   2  21  13  305.42   28.18
  -2 -21 -13  280.63   24.79
   2  21  14   15.78   19.16
  -2 -21 -14  -14.65   22.54
   2  21  15  -20.29   19.16
  -2 -21 -15   19.16   25.92
  -2 -22  16   23.67   14.65
  -2 -22  15   94.67   13.52
  -2 -22  14   83.40   14.65
  -2 -22  13  199.48   15.78
  -2 -22  12   -1.13   11.27
  -2 -22  11   61.99   23.67
  -2 -22  10   48.46   11.27
  -2 -22   9  263.72   18.03
  -2 -22   8   47.34   11.27
  -2 -22   7   24.79   10.14
  -2 -22   6  132.99   14.65
  -2 -22   5  243.44   14.65
  -2 -22   4   32.68   11.27
  -2 -22   3   34.94   12.40
  -2 -22   2  119.47   14.65
  -2 -22   1  361.78   19.16
  -2 -22   0   40.57   10.14
  -2 -22  -1   -2.25   11.27
  -2 -22  -2   60.86   15.78
  -2 -22  -3  278.38   20.29
  -2 -22  -4   75.51   14.65
  -2 -22  -5    6.76   11.27
   2  22   6   38.32   14.65
  -2 -22  -6   36.06   11.27
   2  22   7  279.50   28.18
  -2 -22  -7  298.66   25.92
   2  22   8   74.38   15.78
  -2 -22  -8   83.40   16.91
   2  22   9   13.52   19.16
  -2 -22  -9   -7.89   14.65
   2  22  10   36.06   15.78
  -2 -22 -10   11.27   22.54
   2  22  11  225.41   24.79
  -2 -22 -11  176.94   28.18
  -2 -22 -12   87.91   21.41
   2  22  13   -3.38   13.52
  -2 -22 -13   24.79   16.91
   2  22  14   63.11   21.41
  -2 -22 -14   84.53   25.92
  -2 -23  14   39.45   12.40
  -2 -23  13   47.34   11.27
  -2 -23  12  130.74   13.52
  -2 -23  11  149.89   16.91
  -2 -23  10   81.15   13.52
  -2 -23   9  -15.78   11.27
  -2 -23   8  160.04   13.52
  -2 -23   7  126.23   21.41
  -2 -23   6   23.67   14.65
  -2 -23   5   14.65   10.14
  -2 -23   4  142.01   15.78
  -2 -23   3  116.08   14.65
  -2 -23   2   93.54   12.40
  -2 -23   1  -33.81   13.52
  -2 -23   0  234.42   15.78
  -2 -23  -1  119.47   14.65
  -2 -23  -2   86.78   13.52
  -2 -23  -3    6.76   11.27
  -2 -23  -4  164.55   20.29
  -2 -23  -5  107.07   13.52
  -2 -23  -6  118.34   13.52
  -2 -23  -7    3.38   11.27
   2  23   8  129.61   20.29
  -2 -23  -8  111.58   13.52
   2  23   9  162.29   23.67
  -2 -23  -9  100.31   25.92
   2  23  10  102.56   18.03
  -2 -23 -10   72.13   24.79
   2  23  11    7.89   19.16
  -2 -23 -11   -3.38   24.79
   2  23  12  134.12   24.79
  -2 -23 -12  110.45   21.41
   2  23  13  118.34   19.16
  -2 -23 -13   93.54   19.16
  -2 -24  13    0.00   11.27
  -2 -24  12   49.59   13.52
  -2 -24  11   -3.38   13.52
  -2 -24  10  199.48   15.78
  -2 -24   9    5.64   14.65
  -2 -24   8   80.02   12.40
  -2 -24   7   19.16   12.40
  -2 -24   6  346.00   19.16
  -2 -24   5   -3.38   12.40
  -2 -24   4  126.23   14.65
  -2 -24   3  -13.52   12.40
  -2 -24   2  316.70   20.29
  -2 -24   1    9.02   12.40
  -2 -24   0  224.28   24.79
  -2 -24  -1    7.89   11.27
  -2 -24  -2  180.32   15.78
  -2 -24  -3    0.00   20.29
  -2 -24  -4  103.69   15.78
  -2 -24  -5    4.51   10.14
  -2 -24  -6  166.80   14.65
  -2 -24  -7   30.43   13.52
  -2 -24  -8   99.18   14.65
  -2 -24  -9   14.65   15.78
   2  24  10  113.83   19.16
  -2 -24 -10  119.47   16.91
   2  24  11   -9.02   15.78
  -2 -24 -11   36.06   14.65
  -2 -25  11  -12.40   16.91
  -2 -25  10   61.99   14.65
  -2 -25   9    2.25   10.14
  -2 -25   8  202.87   22.54
  -2 -25   7    9.02   14.65
  -2 -25   6  114.96   18.03
  -2 -25   5   10.14   12.40
  -2 -25   4  314.44   19.16
  -2 -25   3   12.40   15.78
  -2 -25   2  103.69   18.03
  -2 -25   1    0.00   14.65
  -2 -25   0  259.22   19.16
  -2 -25  -1    1.13   11.27
  -2 -25  -2  125.10   15.78
  -2 -25  -3    2.25   13.52
  -2 -25  -4  185.96   20.29
  -2 -25  -5   10.14   13.52
  -2 -25  -6  101.43   15.78
  -2 -25  -7   -1.13   15.78
  -2 -25  -8  146.51   15.78
  -2 -25  -9    5.64   12.40
  -2 -26   8   48.46   14.65
  -2 -26   7    9.02   11.27
  -2 -26   6  162.29   16.91
  -2 -26   5  134.12   14.65
  -2 -26   4   55.22   14.65
  -2 -26   3    3.38   12.40
  -2 -26   2  205.12   16.91
  -2 -26   1   93.54   15.78
  -2 -26   0  117.21   19.16
  -2 -26  -1  -14.65   13.52
  -2 -26  -2  127.35   14.65
  -2 -26  -3   68.75   13.52
  -2 -26  -4   24.79   14.65
  -2 -26  -5   21.41   12.40
  -2 -26  -6  140.88   15.78
  -2 -26  -7   54.10   23.67
  -2 -27   4   41.70   18.03
  -2 -27   3  153.28   22.54
  -2 -27   2   13.52   14.65
  -2 -27   1    2.25   12.40
  -2 -27   0   48.46   13.52
  -2 -27  -1  217.52   25.92
  -2 -27  -2    4.51   18.03
  -2 -27  -3    3.38   16.91
   3   0 -26   18.03   16.91
   3   0 -25  356.14   23.67
   3   0 -24   -9.02   11.27
   3   0 -23  151.02   10.14
   3   0 -22    4.51    5.64
   3   0 -21  438.41   13.52
   3   0 -20   -3.38    4.51
   3   0 -19  261.47    9.02
   3   0 -18   -5.64    3.38
   3   0 -17  255.84   10.14
   3   0 -16    0.00    3.38
   3   0 -15  209.63    9.02
   3   0 -14    0.00    2.25
   3   0 -13 1032.36   27.05
   3   0 -12   -1.13    2.25
   3   0 -11  326.84   15.78
   3   0 -10    0.00    2.25
   3   0  -9 1123.65   28.18
   3   0  -8   -1.13    1.13
   3   0  -7  518.43   13.52
   3   0  -6    0.00    2.25
   3   0  -5   55.22    2.25
   3   0   2    3.38    1.13
   3   0   3  400.10   13.52
   3   0   4    0.00    1.13
   3   0   7   13.52    2.25
   3   0   8   -3.38    3.38
   3   0   9 1584.60   55.22
   3   0  10   -3.38    4.51
   3   0  11  188.21    9.02
   3   0  12   -7.89    4.51
   3   0  13 1316.37   36.06
   3   0  14  -13.52    6.76
   3   0  15   60.86   11.27
   3   0  16    1.13    7.89
   3   0  17  864.43   38.32
   3   0  18    3.38   10.14
   3   0  19   18.03   11.27
   3   0  20    0.00   13.52
   3   0  21  626.63   25.92
   3   0  22    3.38   14.65
   3   0  23   50.72   18.03
   3   0  24    0.00   18.03
  -3  -1  26   61.99   20.29
  -3  -1  25   50.72   16.91
   3   1 -24   -9.02   15.78
  -3  -1  24   -3.38   14.65
   3   1 -23  246.82   11.27
  -3  -1  23  238.93   11.27
   3   1 -22   63.11    7.89
  -3  -1  22   61.99    6.76
   3   1 -21   71.00    5.64
  -3  -1  21   69.88    5.64
   3   1 -20   -4.51    3.38
  -3  -1  20    0.00    3.38
   3   1 -19  862.18   20.29
  -3  -1  19  884.72   25.92
   3   1 -18  161.17    6.76
  -3  -1  18  163.42    9.02
   3   1 -17  152.15    7.89
  -3  -1  17  165.67    9.02
   3   1 -16   75.51    5.64
  -3  -1  16   69.88    5.64
   3   1 -15  701.01   21.41
  -3  -1  15  707.77   21.41
   3   1 -14  303.17   11.27
  -3  -1  14  308.81   11.27
   3   1 -13  164.55    6.76
  -3  -1  13  165.67    6.76
   3   1 -12    4.51    2.25
  -3  -1  12   -3.38    2.25
   3   1 -11  176.94    6.76
  -3  -1  11  173.56   10.14
   3   1 -10    6.76    2.25
  -3  -1  10    9.02    2.25
   3   1  -9  181.45    5.64
  -3  -1   9  179.20    5.64
   3   1  -8    1.13    1.13
  -3  -1   8   10.14    1.13
  -3  -1   7 1185.63   25.92
  -3  -1   6  176.94    4.51
   3   1  -5 2178.55   71.00
   3   1  -4  246.82    6.76
  -3  -1   4  245.69   12.40
   3   1  -3   94.67    3.38
   3   1  -2  681.85   23.67
   3   1  -1 5183.21  166.80
  -3  -1   1 5450.31  174.69
   3   1   0   98.05    4.51
  -3  -1   0   82.27    3.38
  -3  -1  -1  427.14   14.65
  -3  -1  -3 1362.58   43.95
  -3  -1  -4   45.08    2.25
  -3  -1  -5  323.46    9.02
  -3  -1  -6  236.68    9.02
  -3  -1  -7 1041.37   37.19
  -3  -1  -8   24.79    3.38
  -3  -1  -9   66.49    3.38
  -3  -1 -10  120.59    7.89
   3   1  13  137.50   14.65
  -3  -1 -13  147.64    7.89
   3   1  14   34.94   10.14
  -3  -1 -14   41.70    5.64
   3   1  15  518.43   27.05
  -3  -1 -15  528.58   18.03
   3   1  16   12.40    9.02
  -3  -1 -16    4.51    4.51
   3   1  17  119.47   14.65
  -3  -1 -17  111.58    9.02
   3   1  18  135.24   14.65
  -3  -1 -18  129.61   15.78
   3   1  19  306.55   23.67
  -3  -1 -19  346.00   27.05
   3   1  20   -2.25   18.03
  -3  -1 -20   -7.89   12.40
   3   1  21   37.19   13.52
  -3  -1 -21   41.70   13.52
   3   1  22   32.68   13.52
  -3  -1 -22   10.14   16.91
   3   1  23  288.52   24.79
  -3  -1 -23  316.70   29.30
   3   1  24   23.67   13.52
  -3  -1 -24    5.64   18.03
  -3  -2  26   81.15   13.52
  -3  -2  25  189.34   15.78
  -3  -2  24  161.17   14.65
   3   2 -23   93.54   11.27
  -3  -2  23   81.15   10.14
   3   2 -22   -2.25    5.64
  -3  -2  22   -6.76    5.64
   3   2 -21  255.84   10.14
  -3  -2  21  258.09   10.14
   3   2 -20  346.00   11.27
  -3  -2  20  350.51   14.65
   3   2 -19   40.57    4.51
  -3  -2  19   45.08    6.76
   3   2 -18    1.13    3.38
  -3  -2  18    6.76    4.51
   3   2 -17  590.56   15.78
  -3  -2  17  592.82   18.03
   3   2 -16  564.64   14.65
  -3  -2  16  573.66   18.03
   3   2 -15  228.79   11.27
  -3  -2  15  226.53    9.02
   3   2 -14    1.13    3.38
  -3  -2  14    3.38    2.25
   3   2 -13  284.01   10.14
  -3  -2  13  271.61    9.02
   3   2 -12  822.73   21.41
  -3  -2  12  802.44   19.16
   3   2 -11   13.52    3.38
  -3  -2  11   10.14    4.51
   3   2 -10  174.69    5.64
  -3  -2  10  164.55    6.76
   3   2  -9  488.00   11.27
  -3  -2   9  485.75   14.65
   3   2  -8  625.50   15.78
  -3  -2   8  646.91   15.78
   3   2  -7  205.12    9.02
  -3  -2   7  215.26    4.51
   3   2  -6    1.13    4.51
  -3  -2   6    4.51    1.13
   3   2  -5  733.70   25.92
  -3  -2   5  759.62   21.41
   3   2  -4   39.45    2.25
  -3  -2   4   39.45    3.38
   3   2  -3 1618.41   42.83
  -3  -2   3 1700.69   57.48
   3   2  -2 1161.97   30.43
  -3  -2   2 1136.05   38.32
  -3  -2   1  329.09   12.40
  -3  -2   0 1331.02   45.08
  -3  -2  -5 1054.90   27.05
  -3  -2  -6  184.83    5.64
  -3  -2  -7  145.39    4.51
  -3  -2  -8  841.89   21.41
  -3  -2  -9  802.44   20.29
  -3  -2 -10    3.38    4.51
  -3  -2 -11   68.75    3.38
  -3  -2 -12  502.65   19.16
   3   2  13  619.87   31.56
  -3  -2 -13  616.48   19.16
   3   2  14  162.29   16.91
  -3  -2 -14  192.72    9.02
   3   2  15   51.84   13.52
  -3  -2 -15   63.11    6.76
   3   2  16  289.65   19.16
  -3  -2 -16  291.90   12.40
   3   2  17  238.93   21.41
  -3  -2 -17  293.03   12.40
   3   2  18   50.72   14.65
  -3  -2 -18   63.11    7.89
   3   2  19   21.41   16.91
  -3  -2 -19    7.89    7.89
   3   2  20  285.14   25.92
  -3  -2 -20  277.25   19.16
   3   2  21  181.45   20.29
  -3  -2 -21  181.45   16.91
   3   2  22   81.15   15.78
  -3  -2 -22   69.88   20.29
   3   2  23   14.65   12.40
  -3  -2 -23   -2.25   16.91
   3   2  24   72.13   15.78
  -3  -2 -24   83.40   16.91
  -3  -3  26  216.39   16.91
  -3  -3  25    1.13   11.27
  -3  -3  24   61.99   14.65
  -3  -3  23  131.86   10.14
   3   3 -22  361.78   19.16
  -3  -3  22  368.54   20.29
   3   3 -21   32.68    5.64
  -3  -3  21   33.81    6.76
   3   3 -20   33.81    4.51
  -3  -3  20   41.70    5.64
   3   3 -19   55.22    4.51
  -3  -3  19   52.97    5.64
   3   3 -18 1227.33   28.18
  -3  -3  18 1294.96   36.06
   3   3 -17   25.92    4.51
  -3  -3  17   27.05    5.64
   3   3 -16  245.69    7.89
  -3  -3  16  225.41    9.02
   3   3 -15  140.88    5.64
  -3  -3  15  151.02    6.76
   3   3 -14 1347.93   30.43
  -3  -3  14 1361.45   32.68
   3   3 -13    4.51    2.25
  -3  -3  13    7.89    5.64
   3   3 -12   36.06    3.38
  -3  -3  12   41.70    4.51
   3   3 -11  127.35    4.51
  -3  -3  11  119.47    6.76
   3   3 -10  401.22   10.14
  -3  -3  10  383.19   18.03
   3   3  -9  631.14   13.52
  -3  -3   9  610.85   18.03
   3   3  -8  219.77    6.76
  -3  -3   8  218.64    6.76
   3   3  -7   28.18    3.38
  -3  -3   7   34.94    2.25
   3   3  -6 1238.60   42.83
  -3  -3   6 1280.30   20.29
   3   3  -5  145.39    6.76
  -3  -3   5  154.40    4.51
   3   3  -4  383.19   11.27
  -3  -3   4  386.57    9.02
   3   3  -3  840.76   24.79
  -3  -3   3  923.04   24.79
  -3  -3   2 1297.21   28.18
  -3  -3  -6  398.97   15.78
  -3  -3  -7   13.52    2.25
  -3  -3  -8   59.73    3.38
  -3  -3  -9   27.05    2.25
  -3  -3 -10  684.11   18.03
   3   3  11  226.53   18.03
  -3  -3 -11  247.95    9.02
   3   3  12  127.35   13.52
  -3  -3 -12  147.64    6.76
   3   3  13  149.89   18.03
  -3  -3 -13  151.02    5.64
   3   3  14  722.43   31.56
  -3  -3 -14  744.97   19.16
   3   3  15  153.28   18.03
  -3  -3 -15  144.26    7.89
   3   3  16  201.74   15.78
  -3  -3 -16  209.63   10.14
  -3  -3 -17    7.89    4.51
   3   3  18  357.27   27.05
  -3  -3 -18  364.03   13.52
   3   3  19    3.38   15.78
  -3  -3 -19   36.06    7.89
   3   3  20   71.00   20.29
  -3  -3 -20   66.49    9.02
   3   3  21  -10.14   11.27
  -3  -3 -21   -3.38    6.76
   3   3  22  268.23   23.67
  -3  -3 -22  237.80   25.92
   3   3  23   37.19   18.03
  -3  -3 -23   21.41   13.52
   3   3  24  103.69   21.41
  -3  -3 -24  126.23   19.16
  -3  -4  26   38.32   16.91
  -3  -4  25   -1.13   15.78
  -3  -4  24  491.38   27.05
  -3  -4  23   24.79    9.02
   3   4 -22   19.16    6.76
  -3  -4  22   -3.38   10.14
   3   4 -21   13.52    5.64
  -3  -4  21   10.14    5.64
   3   4 -20  810.33   27.05
  -3  -4  20  787.79   24.79
   3   4 -19    1.13    4.51
  -3  -4  19    5.64    5.64
   3   4 -18  158.91    7.89
  -3  -4  18  162.29   11.27
   3   4 -17   58.61    5.64
  -3  -4  17   82.27    7.89
   3   4 -16  876.83   22.54
  -3  -4  16  885.84   22.54
   3   4 -15   37.19    3.38
  -3  -4  15   37.19    5.64
   3   4 -14  146.51    5.64
  -3  -4  14  142.01    7.89
   3   4 -13    1.13    3.38
  -3  -4  13    4.51    4.51
   3   4 -12 1271.29   28.18
  -3  -4  12 1240.86   48.46
   3   4 -11   -1.13    2.25
  -3  -4  11    0.00    4.51
   3   4 -10  162.29    5.64
  -3  -4  10  162.29    7.89
   3   4  -9   74.38    3.38
  -3  -4   9   68.75    4.51
  -3  -4   8  722.43   16.91
  -3  -4   7   86.78    4.51
  -3  -4   6   33.81    2.25
  -3  -4   5  132.99    4.51
  -3  -4   4 2623.72   56.35
   3   4  -3  100.31    4.51
  -3  -4   3  100.31    4.51
   3   4  -2  180.32    6.76
  -3  -4   2  188.21    6.76
   3   4  -1   34.94    4.51
  -3  -4   1   29.30    4.51
   3   4   0 1785.21   71.00
  -3  -4   0 1805.50   68.75
   3   4   5    2.25    3.38
  -3  -4  -7  231.04   10.14
   3   4   8  941.07   61.99
  -3  -4  -8 1075.19   39.45
  -3  -4  -9    7.89    4.51
  -3  -4 -10  438.41   12.40
   3   4  11   10.14    6.76
  -3  -4 -11   11.27    3.38
   3   4  12  956.85   48.46
  -3  -4 -12 1034.61   28.18
   3   4  13  -40.57   16.91
  -3  -4 -13   -3.38    3.38
   3   4  14   32.68    9.02
  -3  -4 -14   32.68    3.38
   3   4  15  -15.78   11.27
  -3  -4 -15    1.13    3.38
   3   4  16  533.08   28.18
  -3  -4 -16  555.63   18.03
   3   4  17   -7.89    9.02
  -3  -4 -17   -6.76    6.76
   3   4  18  306.55   24.79
  -3  -4 -18  276.12   12.40
   3   4  19   -2.25   15.78
  -3  -4 -19    3.38    5.64
  -3  -4 -20  339.24   13.52
   3   4  21  -33.81   13.52
  -3  -4 -21  -15.78    7.89
   3   4  22  129.61   18.03
  -3  -4 -22  111.58    9.02
   3   4  23   11.27   16.91
  -3  -4 -23   -3.38    5.64
   3   4  24  258.09   27.05
  -3  -4 -24  231.04   28.18
  -3  -5  26  263.72   21.41
  -3  -5  25    0.00   12.40
  -3  -5  24   34.94   11.27
  -3  -5  23   25.92    7.89
   3   5 -22  460.95   21.41
  -3  -5  22  444.05   18.03
   3   5 -21   14.65    5.64
  -3  -5  21   13.52    5.64
   3   5 -20   12.40    4.51
  -3  -5  20   22.54    5.64
   3   5 -19   89.04    6.76
  -3  -5  19   82.27    6.76
   3   5 -18  808.08   29.30
  -3  -5  18  897.11   24.79
   3   5 -17  139.75    7.89
  -3  -5  17  142.01    6.76
   3   5 -16  132.99    7.89
  -3  -5  16  142.01    9.02
   3   5 -15  138.62    7.89
  -3  -5  15  134.12    7.89
   3   5 -14 1122.52   39.45
  -3  -5  14 1123.65   45.08
   3   5 -13   59.73    5.64
  -3  -5  13   60.86    7.89
   3   5 -12   48.46    3.38
  -3  -5  12   54.10    6.76
   3   5 -11  167.93    6.76
  -3  -5  11  162.29    7.89
   3   5 -10 2284.49   81.15
  -3  -5  10 2171.78   46.21
  -3  -5   9   72.13    4.51
  -3  -5   8    7.89    3.38
  -3  -5   7    6.76    2.25
  -3  -5   6 2161.64   45.08
  -3  -5   5  244.57    6.76
   3   5  -4    0.00    2.25
  -3  -5   4    0.00    1.13
   3   5  -3  251.33    9.02
  -3  -5   3  265.98   10.14
   3   5  -2  634.52   24.79
  -3  -5   2  520.69   28.18
  -3  -5   1    6.76    2.25
   3   5   0   63.11    6.76
   3   5   1   57.48    6.76
   3   5   5   85.65   10.14
   3   5   7  125.10   12.40
   3   5   8  343.74   30.43
  -3  -5  -8  307.68   12.40
   3   5   9    4.51    4.51
  -3  -5  -9    3.38    4.51
   3   5  10  921.91   51.84
  -3  -5 -10  985.02   34.94
   3   5  11  146.51   15.78
  -3  -5 -11  143.13    6.76
   3   5  12   74.38   18.03
  -3  -5 -12   87.91    4.51
   3   5  13   -5.64    6.76
  -3  -5 -13   -5.64    3.38
   3   5  14 1214.94   50.72
  -3  -5 -14 1174.36   27.05
   3   5  15  237.80   20.29
  -3  -5 -15  253.58    9.02
   3   5  16   89.04   14.65
  -3  -5 -16   68.75    5.64
   3   5  17   -2.25   12.40
  -3  -5 -17    0.00    3.38
   3   5  18  421.51   27.05
  -3  -5 -18  453.07   15.78
   3   5  19   93.54   11.27
  -3  -5 -19   80.02    7.89
   3   5  20   65.37   13.52
  -3  -5 -20   83.40    9.02
   3   5  21   -1.13    9.02
  -3  -5 -21    4.51    6.76
   3   5  22  351.63   28.18
  -3  -5 -22  305.42   14.65
   3   5  23   89.04   19.16
  -3  -5 -23   57.48   20.29
   3   5  24  148.77   23.67
  -3  -5 -24  123.97   20.29
  -3  -6  25  108.19   20.29
  -3  -6  24  214.14   16.91
  -3  -6  23   43.95   10.14
   3   6 -22   15.78    6.76
  -3  -6  22    3.38    7.89
   3   6 -21   95.80    7.89
  -3  -6  21   91.29    9.02
   3   6 -20  353.89   12.40
  -3  -6  20  351.63   13.52
   3   6 -19  108.19    7.89
  -3  -6  19   87.91    6.76
   3   6 -18   12.40    3.38
  -3  -6  18   13.52    4.51
   3   6 -17  465.46   16.91
  -3  -6  17  412.49   13.52
   3   6 -16  604.09   20.29
  -3  -6  16  642.41   22.54
   3   6 -15  183.71    7.89
  -3  -6  15  166.80   11.27
  -3  -6  14    4.51    9.02
   3   6 -13  463.21   23.67
  -3  -6  13  503.78   20.29
   3   6 -12 1041.37   39.45
  -3  -6  12  960.23   28.18
   3   6 -11   95.80    6.76
  -3  -6  11   87.91    5.64
   3   6 -10    0.00    3.38
  -3  -6  10    0.00    3.38
   3   6  -9  144.26    7.89
  -3  -6   9  139.75    4.51
  -3  -6   8  548.86   13.52
  -3  -6   7  162.29    4.51
  -3  -6   6    0.00    1.13
  -3  -6   5  200.61    5.64
   3   6  -4 1359.20   63.11
  -3  -6   4 1589.11   33.81
   3   6  -3  971.50   28.18
  -3  -6   3 1032.36   29.30
   3   6  -2   39.45    3.38
  -3  -6   2   42.83    3.38
  -3  -6   1  481.24   19.16
   3   6   0 1083.07   39.45
  -3  -6   0  788.92   43.95
   3   6   1  147.64   34.94
  -3  -6  -1 4522.77  254.71
   3   6   2   85.65    9.02
   3   6   3  785.54   33.81
  -3  -6  -3  724.68   30.43
   3   6   4  883.59   40.57
  -3  -6  -4  822.73   37.19
   3   6   5  671.71   31.56
  -3  -6  -5  606.34   29.30
   3   6   6   13.52    5.64
   3   6   7  359.52   33.81
   3   6   8 1026.72   58.61
   3   6   9  814.84  113.83
  -3  -6  -9  748.35   29.30
   3   6  10  187.09   15.78
  -3  -6 -10  222.02   11.27
  -3  -6 -11   24.79    4.51
   3   6  12 1041.37   51.84
  -3  -6 -12 1047.01   30.43
   3   6  13  314.44   21.41
  -3  -6 -13  305.42   10.14
   3   6  14   15.78   12.40
  -3  -6 -14   22.54    4.51
   3   6  15    6.76   13.52
  -3  -6 -15   22.54    4.51
   3   6  16  528.58   31.56
  -3  -6 -16  565.77   15.78
   3   6  17  174.69   19.16
  -3  -6 -17  155.53    6.76
   3   6  18   69.88   14.65
  -3  -6 -18  109.32    6.76
   3   6  19    2.25    7.89
  -3  -6 -19    9.02    5.64
   3   6  20  226.53   22.54
  -3  -6 -20  217.52   11.27
   3   6  21  237.80   20.29
  -3  -6 -21  207.37   10.14
   3   6  22   66.49   18.03
  -3  -6 -22   45.08   10.14
   3   6  23   14.65   18.03
  -3  -6 -23  -15.78   13.52
   3   6  24  137.50   18.03
  -3  -6 -24  143.13   25.92
  -3  -7  25   33.81   19.16
  -3  -7  24   -3.38   15.78
  -3  -7  23  219.77   14.65
   3   7 -22  144.26   11.27
  -3  -7  22  134.12   10.14
   3   7 -21  126.23    7.89
  -3  -7  21  127.35   10.14
   3   7 -20   -3.38    5.64
  -3  -7  20    5.64    4.51
   3   7 -19  498.15   16.91
  -3  -7  19  480.11   15.78
   3   7 -18  160.04    7.89
  -3  -7  18  164.55    7.89
   3   7 -17  245.69   10.14
  -3  -7  17  275.00   11.27
   3   7 -16    0.00    3.38
  -3  -7  16   -6.76    4.51
   3   7 -15  986.15   32.68
  -3  -7  15  936.56   28.18
   3   7 -14  181.45   37.19
  -3  -7  14  164.55    9.02
   3   7 -13  245.69   10.14
  -3  -7  13  261.47   10.14
   3   7 -12   -4.51    3.38
  -3  -7  12   -1.13    3.38
   3   7 -11  685.23   28.18
  -3  -7  11  659.31   14.65
   3   7 -10  349.38   16.91
  -3  -7  10  355.01   12.40
   3   7  -9  705.52   27.05
  -3  -7   9  701.01   15.78
  -3  -7   8    7.89    2.25
  -3  -7   7 1059.41   21.41
  -3  -7   6  689.74   19.16
  -3  -7   5 1902.42   49.59
   3   7  -4    7.89    3.38
  -3  -7   4    2.25    2.25
   3   7  -3  385.44   20.29
  -3  -7   3  420.38   12.40
   3   7  -2  120.59    5.64
  -3  -7   2  132.99    6.76
   3   7  -1  792.30   24.79
  -3  -7   1  596.20   33.81
   3   7   0   83.40    7.89
  -3  -7   0   65.37    5.64
   3   7   1  988.40   38.32
   3   7   2  846.40   32.68
   3   7   3  987.28   42.83
  -3  -7  -3 1001.93   43.95
   3   7   4  147.64   12.40
  -3  -7  -4  125.10   12.40
   3   7   5  449.68   24.79
  -3  -7  -5  471.10   27.05
   3   7   6 1061.66   48.46
  -3  -7  -6 1004.18   46.21
   3   7   7 1187.89   50.72
  -3  -7  -7 1315.24   75.51
   3   7   8   45.08   10.14
  -3  -7  -8   21.41    6.76
   3   7   9   -6.76   28.18
  -3  -7  -9   24.79    7.89
   3   7  10  219.77   16.91
  -3  -7 -10  222.02   10.14
   3   7  11  631.14   30.43
  -3  -7 -11  659.31   22.54
   3   7  12   22.54    9.02
  -3  -7 -12   14.65    5.64
   3   7  13   81.15   12.40
  -3  -7 -13   77.76   10.14
   3   7  14  187.09   19.16
  -3  -7 -14  198.36    7.89
   3   7  15  671.71   34.94
  -3  -7 -15  696.50   18.03
   3   7  16   10.14   10.14
  -3  -7 -16    7.89    4.51
   3   7  17   25.92   16.91
  -3  -7 -17    6.76    5.64
   3   7  18  108.19   15.78
  -3  -7 -18  100.31    6.76
   3   7  19  341.49   22.54
  -3  -7 -19  361.78   12.40
   3   7  20   54.10   20.29
  -3  -7 -20   39.45    7.89
   3   7  21   11.27   11.27
  -3  -7 -21   -4.51    7.89
   3   7  22  144.26   23.67
  -3  -7 -22   59.73   12.40
   3   7  23  253.58   27.05
  -3  -7 -23  244.57   25.92
  -3  -8  25  242.31   21.41
  -3  -8  24   -4.51   16.91
  -3  -8  23  107.07   11.27
   3   8 -22   -4.51    6.76
  -3  -8  22   -3.38    7.89
   3   8 -21  331.35   13.52
  -3  -8  21  329.09   13.52
   3   8 -20    4.51    5.64
  -3  -8  20    0.00    4.51
   3   8 -19   68.75    7.89
  -3  -8  19   75.51    5.64
   3   8 -18   -3.38    4.51
  -3  -8  18   -5.64    3.38
   3   8 -17  830.62   28.18
  -3  -8  17  794.56   19.16
   3   8 -16   69.88    6.76
  -3  -8  16   65.37    4.51
   3   8 -15  389.95   16.91
  -3  -8  15  398.97   12.40
  -3  -8  14   16.91    3.38
   3   8 -13  422.64   22.54
  -3  -8  13  466.59   15.78
   3   8 -12   42.83    5.64
  -3  -8  12   22.54    4.51
   3   8 -11  561.26   24.79
  -3  -8  11  581.55   15.78
  -3  -8  10   20.29    4.51
  -3  -8   9 1097.73   21.41
  -3  -8   8   34.94    4.51
  -3  -8   7 1205.92   32.68
  -3  -8   6    1.13    3.38
  -3  -8   5 1231.84   36.06
   3   8  -4   12.40    4.51
  -3  -8   4   11.27    2.25
   3   8  -3  925.29   55.22
  -3  -8   3 1459.50   39.45
   3   8  -2  107.07    5.64
  -3  -8   2   96.92   10.14
   3   8  -1  436.16   19.16
  -3  -8   1  414.75   15.78
   3   8   0   -3.38    5.64
  -3  -8   0    5.64    3.38
   3   8   1 1254.38   52.97
  -3  -8  -1 1084.20   34.94
   3   8   2    3.38    5.64
  -3  -8  -2    4.51    4.51
   3   8   3  409.11   20.29
  -3  -8  -3  406.86   22.54
   3   8   4  104.81    9.02
  -3  -8  -4  110.45   10.14
   3   8   5  844.14   36.06
  -3  -8  -5  876.83   42.83
   3   8   6   91.29   10.14
  -3  -8  -6  136.37   15.78
   3   8   7  295.28   18.03
  -3  -8  -7  300.92   19.16
   3   8   8   51.84    9.02
   3   8   9  808.08   39.45
  -3  -8  -9  725.81   38.32
   3   8  10   30.43   11.27
  -3  -8 -10    7.89    4.51
   3   8  11  192.72   15.78
  -3  -8 -11  167.93   11.27
   3   8  12  -12.40    7.89
  -3  -8 -12   -3.38    4.51
   3   8  13  812.59   40.57
  -3  -8 -13  854.29   25.92
   3   8  14    2.25   13.52
  -3  -8 -14   -3.38    6.76
   3   8  15   72.13   11.27
  -3  -8 -15   69.88    6.76
   3   8  16   13.52   11.27
  -3  -8 -16   10.14    5.64
  -3  -8 -17  536.47   14.65
   3   8  18  -33.81   19.16
  -3  -8 -18    2.25    5.64
   3   8  19  -32.68   15.78
  -3  -8 -19    2.25    5.64
   3   8  20    1.13   14.65
  -3  -8 -20    4.51    5.64
   3   8  21  436.16   28.18
  -3  -8 -21  483.50   20.29
   3   8  22  -20.29   16.91
  -3  -8 -22   -2.25    6.76
   3   8  23   38.32   13.52
  -3  -8 -23   49.59   20.29
  -3  -9  25   85.65   18.03
  -3  -9  24    4.51   12.40
  -3  -9  23  278.38   14.65
  -3  -9  22   18.03   10.14
   3   9 -21  178.07   12.40
  -3  -9  21  169.05    9.02
   3   9 -20   -5.64    6.76
  -3  -9  20   -1.13    4.51
   3   9 -19  289.65   15.78
  -3  -9  19  273.87    9.02
  -3  -9  18  109.32    6.76
   3   9 -17  180.32   13.52
  -3  -9  17  184.83    7.89
   3   9 -16   -1.13    5.64
  -3  -9  16    2.25    4.51
   3   9 -15  376.43   50.72
  -3  -9  15  575.91   15.78
   3   9 -14   11.27    4.51
  -3  -9  14    6.76    4.51
   3   9 -13  255.84   13.52
  -3  -9  13  254.71    9.02
   3   9 -12   33.81    5.64
  -3  -9  12   38.32    5.64
  -3  -9  11  584.93   14.65
  -3  -9  10   16.91    4.51
   3   9  -9  247.95   12.40
  -3  -9   9  262.60   11.27
  -3  -9   8   13.52    3.38
  -3  -9   7 1169.86   32.68
  -3  -9   6  324.58   10.14
  -3  -9   5  977.13   23.67
   3   9  -4   47.34    6.76
  -3  -9   4   52.97    4.51
  -3  -9   3  910.64   27.05
   3   9  -2  236.68   16.91
  -3  -9   2  308.81   12.40
  -3  -9   1  677.34   29.30
   3   9   0   12.40    3.38
  -3  -9   0   18.03    6.76
   3   9   1  755.11   31.56
  -3  -9  -1  627.76   25.92
   3   9   2  275.00   15.78
  -3  -9  -2  271.61   12.40
   3   9   3 1362.58   71.00
  -3  -9  -3 1347.93   58.61
   3   9   4   67.62    9.02
  -3  -9  -4   61.99   11.27
   3   9   5  268.23   16.91
  -3  -9  -5  263.72   18.03
   3   9   6   84.53   11.27
  -3  -9  -6   89.04   11.27
   3   9   7 1265.65   51.84
  -3  -9  -7  794.56  111.58
   3   9   8   19.16    7.89
  -3  -9  -8   -6.76    7.89
  -3  -9  -9  143.13   15.78
   3   9  10   34.94   12.40
   3   9  11  682.98   31.56
  -3  -9 -11  741.58   24.79
   3   9  12   -7.89    7.89
  -3  -9 -12    0.00    5.64
   3   9  13  108.19   14.65
  -3  -9 -13   93.54    7.89
   3   9  14  205.12   16.91
  -3  -9 -14  203.99   10.14
   3   9  15  757.36   28.18
  -3  -9 -15  689.74   23.67
   3   9  16   47.34   16.91
  -3  -9 -16   73.26    6.76
   3   9  17   20.29   12.40
  -3  -9 -17    7.89    5.64
   3   9  18   16.91    9.02
  -3  -9 -18   22.54    5.64
   3   9  19  520.69   31.56
  -3  -9 -19  586.05   16.91
   3   9  20    0.00   14.65
  -3  -9 -20    6.76    5.64
   3   9  21   20.29   16.91
  -3  -9 -21   16.91   10.14
   3   9  22   37.19   18.03
  -3  -9 -22   20.29   11.27
   3   9  23  305.42   28.18
  -3  -9 -23  295.28   27.05
  -3 -10  24  101.43   19.16
  -3 -10  23   40.57    9.02
  -3 -10  22   27.05   11.27
   3  10 -21  188.21   13.52
  -3 -10  21  211.88   11.27
  -3 -10  20  130.74    9.02
   3  10 -19   41.70    7.89
  -3 -10  19   46.21    7.89
   3  10 -18   39.45    9.02
  -3 -10  18   43.95    5.64
   3  10 -17  357.27   22.54
  -3 -10  17  374.17   11.27
   3  10 -16  645.79   28.18
  -3 -10  16  610.85   14.65
   3  10 -15  175.82   11.27
  -3 -10  15  176.94    6.76
   3  10 -14   13.52    6.76
  -3 -10  14   13.52    4.51
   3  10 -13  251.33   14.65
  -3 -10  13  223.15    9.02
  -3 -10  12  370.79   12.40
  -3 -10  11  112.70    6.76
   3  10 -10   16.91    4.51
  -3 -10  10   10.14    4.51
   3  10  -9  670.58   30.43
  -3 -10   9  688.61   15.78
  -3 -10   8  233.29   11.27
  -3 -10   7  335.85    9.02
  -3 -10   6    0.00    3.38
  -3 -10   5  326.84   10.14
   3  10  -4  739.33   48.46
  -3 -10   4 1193.52   29.30
  -3 -10   3  485.75   14.65
   3  10  -2  389.95   22.54
  -3 -10   2  400.10   12.40
   3  10  -1  270.49   15.78
  -3 -10   1  281.76   10.14
   3  10   0  207.37   13.52
   3  10   2   71.00   11.27
  -3 -10  -2   95.80   10.14
   3  10   3  127.35   38.32
  -3 -10  -3  182.58   14.65
   3  10   4  449.68   22.54
  -3 -10  -4  412.49   24.79
   3  10   5 1211.56   50.72
  -3 -10  -5 1107.87   57.48
   3  10   6   33.81   10.14
  -3 -10  -6   27.05   29.30
   3  10   7  167.93   15.78
  -3 -10  -7  165.67   13.52
   3  10   8  466.59   23.67
  -3 -10  -8  472.23   25.92
   3  10   9  311.06   22.54
  -3 -10  -9  312.19   20.29
   3  10  10    9.02   12.40
  -3 -10 -10   13.52    7.89
   3  10  11   84.53   12.40
  -3 -10 -11  100.31    7.89
   3  10  12  357.27   21.41
  -3 -10 -12  410.24   15.78
   3  10  13  365.16   21.41
  -3 -10 -13  355.01   12.40
   3  10  14   15.78    6.76
  -3 -10 -14    5.64    7.89
   3  10  15   51.84    7.89
  -3 -10 -15   39.45    7.89
   3  10  16  231.04   20.29
  -3 -10 -16  218.64   11.27
   3  10  17  317.82   18.03
  -3 -10 -17  313.31   11.27
   3  10  18   65.37   16.91
  -3 -10 -18   68.75    6.76
   3  10  19   54.10   16.91
  -3 -10 -19   24.79    6.76
   3  10  20  101.43   15.78
  -3 -10 -20  111.58   12.40
   3  10  21  303.17   28.18
  -3 -10 -21  268.23   14.65
   3  10  22   60.86   13.52
  -3 -10 -22   48.46   23.67
  -3 -11  24   33.81   11.27
  -3 -11  23  169.05   12.40
  -3 -11  22  233.29   14.65
   3  11 -21   21.41    9.02
  -3 -11  21   20.29    7.89
   3  11 -20    3.38    9.02
  -3 -11  20    4.51    7.89
   3  11 -19  132.99   11.27
  -3 -11  19  129.61    7.89
   3  11 -18  386.57   20.29
  -3 -11  18  371.92   13.52
   3  11 -17   29.30    7.89
  -3 -11  17   19.16    4.51
   3  11 -16    5.64    5.64
  -3 -11  16    5.64    5.64
   3  11 -15  146.51   12.40
  -3 -11  15  154.40    7.89
   3  11 -14  471.10   23.67
  -3 -11  14  480.11   12.40
   3  11 -13  193.85   13.52
  -3 -11  13  210.75    9.02
  -3 -11  12   -1.13    4.51
  -3 -11  11  376.43   10.14
  -3 -11  10  895.99   20.29
  -3 -11   9   57.48    4.51
  -3 -11   8   -7.89    4.51
  -3 -11   7   30.43    3.38
  -3 -11   6 1132.66   30.43
  -3 -11   5   91.29    4.51
   3  11  -4   25.92    6.76
  -3 -11   4   27.05    5.64
  -3 -11   3  311.06   12.40
   3  11  -2  667.20   34.94
  -3 -11   2  782.16   39.45
  -3 -11   1  723.55   39.45
   3  11   0    4.51    4.51
   3  11   1   13.52    7.89
   3  11   2 1608.27  134.12
  -3 -11  -2 2237.15   92.42
   3  11   3  610.85   33.81
  -3 -11  -3  573.66   30.43
   3  11   4   41.70   16.91
  -3 -11  -4  110.45   13.52
   3  11   5  125.10   12.40
   3  11   6  663.82   33.81
  -3 -11  -6  737.08   25.92
   3  11   7  194.98   16.91
  -3 -11  -7  198.36   16.91
  -3 -11  -8   36.06    6.76
   3  11   9   94.67   13.52
  -3 -11  -9   63.11   13.52
   3  11  10  516.18   27.05
  -3 -11 -10  547.74   27.05
   3  11  11  207.37   12.40
  -3 -11 -11  191.59   13.52
   3  11  12  134.12   18.03
  -3 -11 -12  114.96    7.89
   3  11  13    3.38    7.89
  -3 -11 -13   14.65    4.51
   3  11  14  644.66   27.05
  -3 -11 -14  633.39   21.41
   3  11  15  151.02   12.40
  -3 -11 -15  151.02    9.02
   3  11  16  146.51   12.40
  -3 -11 -16  142.01    9.02
   3  11  17   25.92   10.14
  -3 -11 -17   29.30    6.76
   3  11  18  305.42   24.79
  -3 -11 -18  294.15   11.27
   3  11  19  125.10   20.29
  -3 -11 -19  113.83    7.89
   3  11  20   76.64   14.65
  -3 -11 -20   64.24    7.89
   3  11  21    2.25   16.91
  -3 -11 -21    2.25    6.76
   3  11  22  252.45   27.05
  -3 -11 -22  241.18   30.43
  -3 -12  23    7.89   11.27
  -3 -12  22   33.81    9.02
  -3 -12  21   33.81    9.02
   3  12 -20  385.44   21.41
  -3 -12  20  383.19   16.91
   3  12 -19   11.27    6.76
  -3 -12  19   11.27    5.64
   3  12 -18   28.18    6.76
  -3 -12  18   21.41    5.64
   3  12 -17   -2.25    5.64
  -3 -12  17    5.64    4.51
  -3 -12  16  596.20   14.65
   3  12 -15    7.89    5.64
  -3 -12  15    0.00    4.51
  -3 -12  14   28.18    5.64
   3  12 -13   29.30    6.76
  -3 -12  13   23.67    4.51
   3  12 -12  901.62   43.95
  -3 -12  12  985.02   22.54
   3  12 -11   52.97    7.89
  -3 -12  11   58.61    5.64
  -3 -12  10   36.06    4.51
  -3 -12   9   57.48    5.64
  -3 -12   8  742.71   19.16
  -3 -12   7    2.25    3.38
  -3 -12   6   29.30    4.51
  -3 -12   5   -3.38    3.38
  -3 -12   4 1177.75   33.81
  -3 -12   3   19.16    4.51
  -3 -12   2   -2.25    5.64
  -3 -12   1   80.02    7.89
  -3 -12   0 1148.44   45.08
   3  12   1   46.21    6.76
  -3 -12  -1   10.14    9.02
   3  12   2    5.64    7.89
  -3 -12  -2    5.64    4.51
   3  12   3   25.92    7.89
  -3 -12  -3   30.43    5.64
   3  12   4 1085.33   33.81
  -3 -12  -4 1061.66   34.94
   3  12   5    4.51    6.76
  -3 -12  -5  -34.94   18.03
   3  12   6   64.24   11.27
  -3 -12  -6   51.84    9.02
   3  12   7   15.78   11.27
  -3 -12  -7    6.76    6.76
   3  12   8  706.65   24.79
  -3 -12  -8  698.76   25.92
   3  12   9   15.78    5.64
  -3 -12  -9    5.64    7.89
   3  12  10  127.35   11.27
  -3 -12 -10  125.10   10.14
  -3 -12 -11   24.79    7.89
   3  12  12  792.30   29.30
  -3 -12 -12  717.92   21.41
   3  12  13    0.00    7.89
  -3 -12 -13   15.78    6.76
   3  12  14   52.97    9.02
  -3 -12 -14   41.70    7.89
   3  12  15    1.13    6.76
  -3 -12 -15   -7.89    6.76
   3  12  16  447.43   27.05
  -3 -12 -16  383.19   13.52
   3  12  17  -13.52   10.14
  -3 -12 -17   15.78    7.89
   3  12  18  128.48   16.91
  -3 -12 -18  111.58    9.02
   3  12  19   19.16   18.03
  -3 -12 -19    0.00    9.02
   3  12  20  453.07   30.43
  -3 -12 -20  343.74   20.29
   3  12  21   -7.89   12.40
  -3 -12 -21    6.76    9.02
   3  12  22   52.97   20.29
  -3 -12 -22   32.68   23.67
  -3 -13  23  -13.52    9.02
  -3 -13  22  231.04   16.91
  -3 -13  21    0.00   10.14
  -3 -13  20   10.14    6.76
   3  13 -19   -9.02    9.02
  -3 -13  19    9.02    6.76
  -3 -13  18  508.29   16.91
  -3 -13  17    4.51    5.64
  -3 -13  16   29.30    7.89
   3  13 -15   67.62    9.02
  -3 -13  15   74.38    6.76
  -3 -13  14  590.56   14.65
   3  13 -13   -4.51    5.64
  -3 -13  13   -4.51    4.51
   3  13 -12  131.86   12.40
  -3 -13  12  134.12    5.64
  -3 -13  11   -1.13    3.38
  -3 -13  10  459.83   14.65
  -3 -13   9   12.40    4.51
  -3 -13   8   89.04    5.64
  -3 -13   7   39.45    4.51
  -3 -13   6  872.32   20.29
  -3 -13   5  238.93   11.27
  -3 -13   4   14.65    5.64
  -3 -13   3    7.89    4.51
  -3 -13   2  852.03   25.92
   3  13  -1   39.45    9.02
  -3 -13   1   19.16    4.51
   3  13   0    5.64    6.76
  -3 -13   0   10.14    4.51
   3  13   1   87.91   15.78
  -3 -13  -1   99.18    9.02
   3  13   2  897.11   29.30
  -3 -13  -2  872.32   31.56
   3  13   3  151.02   10.14
  -3 -13  -3  158.91   10.14
   3  13   4   -3.38   16.91
  -3 -13  -4    2.25    5.64
   3  13   5    1.13    9.02
  -3 -13  -5  -12.40    6.76
   3  13   6 1444.85   41.70
  -3 -13  -6 1420.06   45.08
   3  13   7   31.56    7.89
  -3 -13  -7   15.78    6.76
   3  13   8   32.68    9.02
  -3 -13  -8   37.19    9.02
   3  13   9    4.51    6.76
  -3 -13  -9   16.91    7.89
   3  13  10 1333.28   40.57
  -3 -13 -10 1227.33   38.32
   3  13  11   14.65    6.76
  -3 -13 -11   11.27    6.76
   3  13  12   69.88   10.14
  -3 -13 -12   71.00   10.14
   3  13  13    9.02    9.02
  -3 -13 -13   -3.38    6.76
   3  13  14  436.16   20.29
  -3 -13 -14  460.95   15.78
   3  13  15   50.72   13.52
  -3 -13 -15   56.35    7.89
   3  13  16   66.49   14.65
  -3 -13 -16   58.61    6.76
   3  13  17    7.89   11.27
  -3 -13 -17  -10.14    7.89
   3  13  18  384.32   24.79
  -3 -13 -18  384.32   32.68
   3  13  19   49.59   15.78
  -3 -13 -19   27.05    9.02
   3  13  20   74.38   20.29
  -3 -13 -20   66.49   11.27
   3  13  21   -6.76   18.03
  -3 -13 -21    5.64   14.65
  -3 -14  23   30.43   13.52
  -3 -14  22   41.70   14.65
  -3 -14  21   91.29   15.78
  -3 -14  20  300.92   16.91
   3  14 -19   29.30   11.27
  -3 -14  19   22.54   10.14
  -3 -14  18    4.51    7.89
  -3 -14  17  206.25   10.14
   3  14 -16  275.00   16.91
  -3 -14  16  254.71   11.27
  -3 -14  15  154.40    7.89
  -3 -14  14   15.78    4.51
   3  14 -13  101.43   12.40
  -3 -14  13  137.50    6.76
  -3 -14  12  478.99   11.27
  -3 -14  11  111.58    5.64
  -3 -14  10    7.89    5.64
  -3 -14   9  342.62   10.14
  -3 -14   8  911.77   19.16
  -3 -14   7  270.49    9.02
  -3 -14   6   56.35    5.64
  -3 -14   5  289.65   10.14
  -3 -14   4  507.16   14.65
  -3 -14   3  427.14   13.52
  -3 -14   2   15.78    5.64
   3  14  -1  226.53   18.03
  -3 -14   1  194.98   13.52
   3  14   0  643.53   31.56
  -3 -14   0  614.23   23.67
   3  14   1  251.33   19.16
  -3 -14  -1  245.69   10.14
   3  14   2    7.89   10.14
  -3 -14  -2   -2.25    4.51
   3  14   3   39.45    7.89
  -3 -14  -3   33.81    6.76
   3  14   4  417.00   15.78
  -3 -14  -4  445.18   27.05
   3  14   5  744.97   24.79
  -3 -14  -5  734.82   27.05
   3  14   6   33.81    9.02
  -3 -14  -6   46.21    7.89
   3  14   7   -5.64   10.14
  -3 -14  -7   20.29    7.89
   3  14   8  348.25   16.91
  -3 -14  -8  297.54   14.65
   3  14   9  286.27   15.78
  -3 -14  -9  281.76   15.78
   3  14  10   11.27    6.76
  -3 -14 -10   -2.25   10.14
   3  14  11   39.45    9.02
  -3 -14 -11   20.29    9.02
   3  14  12  229.91   15.78
  -3 -14 -12  219.77   19.16
   3  14  13  171.31   13.52
  -3 -14 -13  155.53   11.27
   3  14  14   61.99   16.91
  -3 -14 -14   45.08    7.89
   3  14  15  -12.40   13.52
  -3 -14 -15   46.21   12.40
   3  14  16  300.92   25.92
  -3 -14 -16  250.20   13.52
   3  14  17  180.32   21.41
  -3 -14 -17  215.26   27.05
  -3 -14 -18   58.61   14.65
   3  14  19   23.67   18.03
  -3 -14 -19   40.57   21.41
   3  14  20  179.20   20.29
  -3 -14 -20  166.80   13.52
   3  14  21   95.80   16.91
  -3 -14 -21  108.19   21.41
  -3 -15  22   80.02   16.91
  -3 -15  21   49.59   19.16
   3  15 -20   -1.13   11.27
  -3 -15  20   11.27   16.91
   3  15 -19  255.84   20.29
  -3 -15  19  238.93   11.27
   3  15 -18   75.51   13.52
  -3 -15  18   69.88    7.89
   3  15 -17  127.35   14.65
  -3 -15  17  117.21    7.89
   3  15 -16    7.89    6.76
  -3 -15  16   10.14    6.76
  -3 -15  15  314.44   11.27
  -3 -15  14  138.62    6.76
  -3 -15  13  333.60   11.27
  -3 -15  12   27.05    4.51
  -3 -15  11  201.74    9.02
  -3 -15  10  235.55    9.02
  -3 -15   9  185.96    7.89
  -3 -15   8   -2.25    4.51
  -3 -15   7  553.37   14.65
  -3 -15   6  188.21    7.89
  -3 -15   5  383.19   11.27
  -3 -15   4   56.35    5.64
  -3 -15   3  313.31   11.27
   3  15  -2  309.93   22.54
  -3 -15   2  286.27   11.27
   3  15  -1  562.39   27.05
  -3 -15   1  504.91   15.78
  -3 -15   0   13.52    6.76
   3  15   1  536.47   28.18
  -3 -15  -1  490.26   14.65
   3  15   2  119.47   14.65
  -3 -15  -2  122.85    7.89
   3  15   3  450.81   29.30
  -3 -15  -3  451.94   15.78
   3  15   4   24.79    9.02
  -3 -15  -4   25.92    5.64
   3  15   5  339.24   16.91
  -3 -15  -5  323.46   15.78
   3  15   6  233.29   13.52
  -3 -15  -6  191.59   14.65
   3  15   7 1097.73   33.81
  -3 -15  -7  973.75   38.32
   3  15   8    5.64    6.76
  -3 -15  -8   -5.64    6.76
   3  15   9   96.92   10.14
  -3 -15  -9  102.56   15.78
   3  15  10  120.59   11.27
  -3 -15 -10  129.61   18.03
   3  15  11  524.07   22.54
  -3 -15 -11  537.59   23.67
   3  15  12   24.79   10.14
  -3 -15 -12   36.06    9.02
   3  15  13  191.59   21.41
  -3 -15 -13  152.15   12.40
   3  15  14   65.37   18.03
  -3 -15 -14   71.00   10.14
   3  15  15  375.30   25.92
  -3 -15 -15  374.17   28.18
   3  15  16    9.02   10.14
  -3 -15 -16  -19.16   18.03
   3  15  17   48.46   14.65
  -3 -15 -17   56.35   21.41
   3  15  18   74.38   14.65
  -3 -15 -18   74.38   16.91
   3  15  19  223.15   23.67
  -3 -15 -19  183.71   28.18
   3  15  20   14.65   19.16
  -3 -15 -20    0.00    6.76
  -3 -16  21  364.03   30.43
  -3 -16  20    6.76   18.03
  -3 -16  19  120.59   11.27
  -3 -16  18    0.00    6.76
  -3 -16  17  282.88   11.27
  -3 -16  16   13.52    5.64
  -3 -16  15  228.79   10.14
  -3 -16  14   66.49    6.76
  -3 -16  13  607.47   18.03
  -3 -16  12   14.65    5.64
  -3 -16  11  732.57   20.29
  -3 -16  10    6.76    4.51
  -3 -16   9  653.68   15.78
  -3 -16   8   -2.25    5.64
  -3 -16   7  667.20   16.91
  -3 -16   6  102.56    6.76
  -3 -16   5  288.52   10.14
  -3 -16   4    4.51    5.64
  -3 -16   3  562.39   14.65
  -3 -16   2   10.14    4.51
   3  16  -1  868.94   40.57
  -3 -16   1  822.73   22.54
  -3 -16   0    7.89    5.64
   3  16   1  374.17   24.79
  -3 -16  -1  401.22   14.65
   3  16   2   28.18   10.14
  -3 -16  -2   36.06    5.64
   3  16   3  474.48   28.18
  -3 -16  -3  444.05   14.65
   3  16   4   43.95   11.27
  -3 -16  -4   15.78    6.76
   3  16   5  705.52   25.92
  -3 -16  -5  687.49   20.29
   3  16   6   25.92    7.89
  -3 -16  -6   23.67    9.02
   3  16   7   76.64   10.14
  -3 -16  -7   91.29   18.03
   3  16   8   14.65   13.52
  -3 -16  -8   22.54   14.65
   3  16   9  599.58   23.67
  -3 -16  -9  569.15   31.56
   3  16  10    5.64   11.27
  -3 -16 -10   15.78   12.40
   3  16  11  104.81   14.65
  -3 -16 -11  143.13   14.65
   3  16  12   -6.76   13.52
  -3 -16 -12    3.38    9.02
   3  16  13  530.83   29.30
  -3 -16 -13  475.61   22.54
   3  16  14   10.14   11.27
  -3 -16 -14  -11.27   13.52
   3  16  15   57.48   20.29
  -3 -16 -15   71.00   21.41
   3  16  16    5.64   16.91
  -3 -16 -16   -5.64   20.29
   3  16  17  439.54   31.56
  -3 -16 -17  449.68   32.68
   3  16  18   -5.64   18.03
  -3 -16 -18  -22.54   36.06
   3  16  19    0.00   12.40
  -3 -16 -19   13.52   14.65
  -3 -17  21   75.51   22.54
  -3 -17  20    0.00   13.52
  -3 -17  19  216.39   12.40
  -3 -17  18   33.81    9.02
  -3 -17  17  116.08   11.27
  -3 -17  16    2.25    6.76
  -3 -17  15  357.27   12.40
  -3 -17  14   40.57    7.89
  -3 -17  13  234.42    9.02
  -3 -17  12   43.95    7.89
  -3 -17  11  460.95   13.52
  -3 -17  10    5.64    5.64
  -3 -17   9  584.93   15.78
  -3 -17   8   -6.76    5.64
  -3 -17   7  539.85   14.65
  -3 -17   6  127.35    7.89
  -3 -17   5  162.29    7.89
  -3 -17   4   25.92    4.51
  -3 -17   3  740.46   18.03
  -3 -17   2  137.50   10.14
   3  17  -1  704.39   34.94
  -3 -17   1  652.55   18.03
  -3 -17   0   -4.51    5.64
   3  17   1  373.05   28.18
  -3 -17  -1  406.86   15.78
   3  17   2   96.92   13.52
  -3 -17  -2   85.65    7.89
   3  17   3  446.30   27.05
  -3 -17  -3  444.05   14.65
   3  17   4   -5.64    9.02
  -3 -17  -4   -1.13    7.89
   3  17   5  379.81   28.18
  -3 -17  -5  385.44   18.03
   3  17   6  108.19   22.54
  -3 -17  -6  137.50   10.14
   3  17   7  327.97   16.91
  -3 -17  -7  341.49   14.65
   3  17   8   20.29    7.89
  -3 -17  -8   21.41   12.40
   3  17   9   95.80   77.76
  -3 -17  -9  145.39   16.91
   3  17  10   75.51   14.65
  -3 -17 -10   54.10   12.40
   3  17  11  624.37   34.94
  -3 -17 -11  607.47   25.92
   3  17  12  -21.41   14.65
  -3 -17 -12   -6.76   12.40
   3  17  13   34.94   18.03
  -3 -17 -13    2.25   13.52
   3  17  14  -10.14   15.78
  -3 -17 -14   10.14   19.16
   3  17  15  275.00   22.54
  -3 -17 -15  290.77   25.92
   3  17  16   -1.13   12.40
  -3 -17 -16   23.67   14.65
   3  17  17   32.68   14.65
  -3 -17 -17    0.00   20.29
   3  17  18   38.32   15.78
  -3 -17 -18   41.70   19.16
   3  17  19  183.71   24.79
  -3 -17 -19  205.12   24.79
  -3 -18  20  130.74   23.67
  -3 -18  19   48.46   21.41
  -3 -18  18   11.27    7.89
  -3 -18  17  222.02   13.52
  -3 -18  16  185.96   13.52
  -3 -18  15  146.51   10.14
  -3 -18  14    1.13    6.76
  -3 -18  13  407.98   15.78
  -3 -18  12  200.61   11.27
  -3 -18  11  147.64    9.02
  -3 -18  10    7.89    6.76
  -3 -18   9  342.62   11.27
  -3 -18   8  428.27   12.40
  -3 -18   7  308.81   11.27
  -3 -18   6   22.54    6.76
  -3 -18   5  346.00   12.40
  -3 -18   4  489.13   14.65
  -3 -18   3  341.49   12.40
  -3 -18   2   15.78    6.76
  -3 -18   1  387.70   12.40
   3  18   0  269.36   23.67
  -3 -18   0  256.96   10.14
   3  18   1  322.33   23.67
  -3 -18  -1  259.22   12.40
   3  18   2   14.65   14.65
  -3 -18  -2   -1.13    5.64
   3  18   3  102.56   32.68
  -3 -18  -3  148.77   12.40
  -3 -18  -4  304.30   14.65
  -3 -18  -5  259.22   12.40
   3  18   6   36.06   14.65
  -3 -18  -6   36.06    7.89
   3  18   7  136.37   15.78
  -3 -18  -7  113.83   15.78
   3  18   8  289.65   23.67
  -3 -18  -8  246.82   15.78
   3  18   9  253.58   23.67
   3  18  10   45.08   13.52
  -3 -18 -10   25.92   13.52
   3  18  11   54.10   13.52
  -3 -18 -11   16.91   13.52
   3  18  12  224.28   23.67
  -3 -18 -12  211.88   24.79
   3  18  13  237.80   21.41
  -3 -18 -13  294.15   30.43
   3  18  14  -20.29   13.52
  -3 -18 -14   22.54   15.78
   3  18  15   49.59   19.16
  -3 -18 -15   16.91   22.54
  -3 -18 -16  118.34   27.05
   3  18  17  129.61   22.54
  -3 -18 -17  153.28   20.29
   3  18  18   16.91   19.16
  -3 -18 -18    3.38   23.67
  -3 -19  19    6.76   19.16
  -3 -19  18  208.50   14.65
  -3 -19  17   21.41   11.27
  -3 -19  16    3.38    7.89
  -3 -19  15   49.59   12.40
  -3 -19  14  298.66   14.65
  -3 -19  13   32.68    7.89
  -3 -19  12    4.51    9.02
  -3 -19  11  214.14   11.27
  -3 -19  10  419.25   14.65
  -3 -19   9  165.67    9.02
  -3 -19   8   -3.38    6.76
  -3 -19   7  148.77    9.02
  -3 -19   6  839.64   20.29
  -3 -19   5  146.51    7.89
  -3 -19   4   -4.51    6.76
  -3 -19   3  222.02   10.14
  -3 -19   2  637.90   16.91
  -3 -19   1   46.21    6.76
  -3 -19   0   -3.38    5.64
   3  19   1   93.54   18.03
  -3 -19  -1   71.00    9.02
  -3 -19  -2  357.27   14.65
  -3 -19  -3  227.66   12.40
  -3 -19  -4   19.16    7.89
   3  19   5   86.78   14.65
  -3 -19  -5   80.02   16.91
   3  19   6  379.81   27.05
  -3 -19  -6  403.48   32.68
   3  19   7   31.56   12.40
  -3 -19  -7   29.30   12.40
   3  19   8   -3.38   15.78
   3  19   9   43.95   13.52
  -3 -19  -9   43.95   19.16
   3  19  10  377.55   30.43
  -3 -19 -10  348.25   29.30
   3  19  11  127.35   18.03
  -3 -19 -11  128.48   19.16
   3  19  12   16.91   13.52
  -3 -19 -12   41.70   16.91
   3  19  13   27.05   18.03
  -3 -19 -13   20.29   21.41
   3  19  14  276.12   22.54
  -3 -19 -14  272.74   29.30
   3  19  15   90.16   16.91
  -3 -19 -15   59.73   19.16
   3  19  16   56.35   18.03
  -3 -19 -16   86.78   21.41
   3  19  17   -4.51   13.52
  -3 -19 -17    9.02   24.79
  -3 -20  18    7.89   20.29
  -3 -20  17    4.51   10.14
  -3 -20  16  306.55   15.78
  -3 -20  15  -11.27   12.40
  -3 -20  14    0.00   10.14
  -3 -20  13   28.18   10.14
  -3 -20  12  484.62   19.16
  -3 -20  11   18.03    9.02
  -3 -20  10    5.64   12.40
  -3 -20   9   14.65    9.02
  -3 -20   8  671.71   20.29
  -3 -20   7    9.02    7.89
  -3 -20   6    5.64    7.89
  -3 -20   5   16.91   11.27
  -3 -20   4  715.66   22.54
  -3 -20   3   11.27    9.02
  -3 -20   2   22.54    7.89
  -3 -20   1   32.68    7.89
  -3 -20   0  659.31   20.29
  -3 -20  -1   40.57   21.41
  -3 -20  -2   37.19   13.52
  -3 -20  -3    7.89   11.27
   3  20   4  368.54   83.40
  -3 -20  -4  681.85   38.32
   3  20   5    7.89   10.14
  -3 -20  -5   -1.13   15.78
   3  20   6    7.89   12.40
  -3 -20  -6   27.05   18.03
   3  20   7   24.79   16.91
  -3 -20  -7    0.00   12.40
   3  20   8  483.50   32.68
  -3 -20  -8  405.73   29.30
   3  20   9   20.29   18.03
  -3 -20  -9   30.43   15.78
   3  20  10   19.16   13.52
  -3 -20 -10   34.94   20.29
   3  20  11   -3.38   18.03
  -3 -20 -11   15.78   21.41
   3  20  12  369.67   25.92
  -3 -20 -12  360.65   29.30
   3  20  13   13.52   14.65
  -3 -20 -13   31.56   18.03
   3  20  14   69.88   22.54
  -3 -20 -14   19.16   22.54
   3  20  15  -12.40   19.16
  -3 -20 -15   21.41   24.79
   3  20  16  281.76   28.18
  -3 -20 -16  242.31   25.92
  -3 -21  17    6.76   11.27
  -3 -21  16    1.13    9.02
  -3 -21  15   11.27   11.27
  -3 -21  14  389.95   20.29
  -3 -21  13    2.25   12.40
  -3 -21  12   -4.51    9.02
  -3 -21  11    3.38   12.40
  -3 -21  10  610.85   23.67
  -3 -21   9  -10.14   12.40
  -3 -21   8    4.51    7.89
  -3 -21   7   45.08   11.27
  -3 -21   6  512.80   23.67
  -3 -21   5   31.56    9.02
  -3 -21   4   14.65   11.27
  -3 -21   3   -2.25   10.14
  -3 -21   2  606.34   23.67
  -3 -21   1    4.51   16.91
  -3 -21   0   29.30   18.03
  -3 -21  -1  -10.14   18.03
  -3 -21  -2  536.47   23.67
   3  21   3    1.13   16.91
  -3 -21  -3    4.51   10.14
   3  21   4   13.52   11.27
  -3 -21  -4   20.29   18.03
   3  21   5    5.64   12.40
  -3 -21  -5   -3.38   18.03
   3  21   6  418.13   31.56
  -3 -21  -6  439.54   33.81
   3  21   7   -6.76   16.91
  -3 -21  -7   -1.13   14.65
   3  21   8   21.41   13.52
  -3 -21  -8   38.32   15.78
   3  21   9   -4.51   18.03
  -3 -21  -9   16.91   14.65
   3  21  10  395.59   29.30
  -3 -21 -10  346.00   31.56
   3  21  11   15.78   16.91
  -3 -21 -11  -36.06   21.41
   3  21  12   45.08   21.41
  -3 -21 -12   55.22   24.79
  -3 -21 -13    5.64   18.03
   3  21  14  193.85   21.41
  -3 -21 -14  192.72   25.92
   3  21  15   54.10   18.03
  -3 -21 -15   46.21   25.92
  -3 -22  16  176.94   14.65
  -3 -22  15   23.67   11.27
  -3 -22  14    2.25   10.14
  -3 -22  13  114.96   15.78
  -3 -22  12  331.35   18.03
  -3 -22  11   32.68   10.14
  -3 -22  10   -1.13   16.91
  -3 -22   9  137.50   12.40
  -3 -22   8  366.28   19.16
  -3 -22   7   39.45   16.91
  -3 -22   6    4.51    9.02
  -3 -22   5   91.29   14.65
  -3 -22   4  446.30   20.29
  -3 -22   3  117.21   16.91
  -3 -22   2   -7.89   15.78
  -3 -22   1   85.65   12.40
  -3 -22   0  501.53   22.54
  -3 -22  -1  142.01   19.16
  -3 -22  -2    3.38   13.52
  -3 -22  -3   50.72   15.78
   3  22   4  244.57   23.67
  -3 -22  -4  265.98   18.03
   3  22   5  123.97   19.16
  -3 -22  -5   67.62   22.54
   3  22   6  -25.92   18.03
  -3 -22  -6   11.27   13.52
   3  22   7   43.95   14.65
  -3 -22  -7   32.68   15.78
   3  22   8  262.60   23.67
  -3 -22  -8  290.77   24.79
   3  22   9   81.15   16.91
  -3 -22  -9   77.76   19.16
   3  22  10  104.81   22.54
  -3 -22 -10   58.61   18.03
   3  22  11   10.14   14.65
  -3 -22 -11   55.22   24.79
   3  22  12  222.02   25.92
  -3 -22 -12  219.77   30.43
   3  22  13   85.65   22.54
  -3 -22 -13   59.73   20.29
   3  22  14   39.45   14.65
  -3 -22 -14   64.24   21.41
  -3 -23  14   86.78   13.52
  -3 -23  13   74.38   13.52
  -3 -23  12   -5.64   14.65
  -3 -23  11  209.63   14.65
  -3 -23  10  160.04   15.78
  -3 -23   9  151.02   14.65
  -3 -23   8   -1.13   12.40
  -3 -23   7  183.71   14.65
  -3 -23   6  158.91   15.78
  -3 -23   5  135.24   19.16
  -3 -23   4    2.25   13.52
  -3 -23   3   98.05   13.52
  -3 -23   2  156.66   15.78
  -3 -23   1  158.91   13.52
  -3 -23   0  -14.65   13.52
  -3 -23  -1  144.26   14.65
  -3 -23  -2   52.97   15.78
  -3 -23  -3  350.51   20.29
  -3 -23  -4   29.30   10.14
   3  23   5   58.61   16.91
  -3 -23  -5   59.73   12.40
   3  23   6   37.19   21.41
  -3 -23  -6   50.72   15.78
   3  23   7  102.56   19.16
  -3 -23  -7  138.62   21.41
   3  23   8  -18.03   21.41
  -3 -23  -8   19.16   16.91
   3  23   9  162.29   21.41
  -3 -23  -9  112.70   20.29
   3  23  10   54.10   23.67
  -3 -23 -10   58.61   18.03
   3  23  11  194.98   22.54
  -3 -23 -11  207.37   29.30
   3  23  12   18.03   16.91
  -3 -23 -12   57.48   28.18
  -3 -24  13  136.37   14.65
  -3 -24  12  -11.27   14.65
  -3 -24  11   49.59   15.78
  -3 -24  10  -25.92   12.40
  -3 -24   9  148.77   16.91
  -3 -24   8   -4.51   11.27
  -3 -24   7  116.08   18.03
  -3 -24   6    1.13   10.14
  -3 -24   5  181.45   14.65
  -3 -24   4   14.65   12.40
  -3 -24   3  199.48   15.78
  -3 -24   2  -30.43   10.14
  -3 -24   1  236.68   18.03
  -3 -24   0  -13.52   14.65
  -3 -24  -1  245.69   25.92
  -3 -24  -2   18.03   12.40
  -3 -24  -3  165.67   16.91
  -3 -24  -4   -4.51   10.14
  -3 -24  -5  173.56   18.03
  -3 -24  -6    9.02   12.40
   3  24   7  161.17   20.29
  -3 -24  -7  157.78   14.65
   3  24   8    0.00   21.41
  -3 -24  -8   30.43   19.16
   3  24   9  297.54   28.18
  -3 -24  -9  275.00   28.18
   3  24  10   29.30   22.54
  -3 -24 -10   -6.76   25.92
   3  24  11   87.91   25.92
  -3 -25  11  209.63   18.03
  -3 -25  10   51.84   13.52
  -3 -25   9  185.96   16.91
  -3 -25   8   28.18   13.52
  -3 -25   7  143.13   14.65
  -3 -25   6   22.54   15.78
  -3 -25   5  139.75   16.91
  -3 -25   4   -2.25   11.27
  -3 -25   3  233.29   18.03
  -3 -25   2   37.19   13.52
  -3 -25   1  152.15   18.03
  -3 -25   0   -1.13   11.27
  -3 -25  -1  118.34   15.78
  -3 -25  -2   11.27   15.78
  -3 -25  -3  302.04   22.54
  -3 -25  -4    9.02   13.52
  -3 -25  -5   56.35   18.03
  -3 -25  -6    4.51   16.91
  -3 -25  -7  250.20   19.16
  -3 -25  -8    3.38   22.54
   3  25   9   71.00   20.29
  -3 -25  -9   75.51   20.29
  -3 -26   8   64.24   16.91
  -3 -26   7  136.37   16.91
  -3 -26   6   -1.13   16.91
  -3 -26   5  132.99   15.78
  -3 -26   4  135.24   19.16
  -3 -26   3   76.64   15.78
  -3 -26   2   -1.13   13.52
  -3 -26   1  181.45   20.29
  -3 -26   0   75.51   15.78
  -3 -26  -1   86.78   14.65
  -3 -26  -2    0.00   11.27
  -3 -26  -3   69.88   16.91
  -3 -26  -4   99.18   15.78
  -3 -26  -5  137.50   16.91
  -3 -26  -6    1.13   16.91
  -3 -27   3   67.62   19.16
  -3 -27   2  217.52   31.56
  -3 -27   1   46.21   20.29
  -3 -27   0   -7.89   19.16
  -3 -27  -1   21.41   27.05
   4   0 -26  218.64   18.03
   4   0 -25   -3.38   12.40
   4   0 -24  246.82   21.41
   4   0 -23  -12.40   14.65
   4   0 -22  285.14   12.40
   4   0 -21   -2.25    3.38
   4   0 -20  672.84   16.91
   4   0 -19   -3.38    2.25
   4   0 -18  422.64   11.27
   4   0 -17   -4.51    2.25
   4   0 -16  822.73   22.54
   4   0 -15   -3.38    2.25
   4   0 -14 1094.34   29.30
   4   0 -13    3.38    2.25
   4   0 -12  655.93   24.79
   4   0 -11    0.00    1.13
   4   0 -10 1876.50   63.11
   4   0  -9   -4.51    5.64
   4   0  -8 1681.53   57.48
   4   0  -6 1340.04   46.21
   4   0  -5   -2.25    2.25
   4   0  13  -11.27    9.02
   4   0  14  449.68   28.18
   4   0  15  -12.40   12.40
   4   0  16  317.82   25.92
   4   0  17  -20.29   14.65
   4   0  18  627.76   36.06
   4   0  19   -6.76   19.16
   4   0  20   29.30   12.40
   4   0  21   19.16   16.91
   4   0  22  342.62   28.18
   4   0  23    5.64   19.16
   4   0  24   13.52   19.16
  -4  -1  26  147.64   16.91
   4   1 -25   69.88   19.16
  -4  -1  25   84.53   19.16
   4   1 -24  213.01   18.03
  -4  -1  24  216.39   16.91
   4   1 -23   -5.64   10.14
  -4  -1  23   -2.25    4.51
   4   1 -22  271.61   11.27
  -4  -1  22  277.25   11.27
   4   1 -21   58.61    4.51
  -4  -1  21   65.37    4.51
   4   1 -20  326.84   12.40
  -4  -1  20  340.36   10.14
   4   1 -19   12.40    3.38
  -4  -1  19   15.78    3.38
   4   1 -18  153.28    5.64
  -4  -1  18  146.51    7.89
   4   1 -17   56.35    4.51
  -4  -1  17   68.75    4.51
   4   1 -16  296.41    9.02
  -4  -1  16  287.39   10.14
   4   1 -15    2.25    2.25
  -4  -1  15    6.76    2.25
   4   1 -14  686.36   15.78
  -4  -1  14  680.73   19.16
   4   1 -13  129.61    4.51
  -4  -1  13  128.48    5.64
  -4  -1  12 1545.16   32.68
  -4  -1  11   11.27    2.25
   4   1 -10  228.79   11.27
  -4  -1  10  234.42    7.89
  -4  -1   9  281.76    9.02
  -4  -1   8  920.78   24.79
   4   1  -7    5.64    3.38
  -4  -1   7    5.64    1.13
   4   1  -6  855.41   16.91
  -4  -1   6  853.16   39.45
   4   1  -5  189.34    5.64
  -4  -1   5  183.71   11.27
   4   1  -4 1963.28   48.46
  -4  -1   4 2029.78   77.76
   4   1  -3  510.54   18.03
  -4  -1   3  528.58   23.67
   4   1  -2  334.73   12.40
  -4  -1   2  338.11   14.65
   4   1  -1 2974.23   98.05
   4   1   0 2680.07   87.91
  -4  -1  -4 1289.32   43.95
  -4  -1  -5    6.76    1.13
  -4  -1  -6   59.73    4.51
  -4  -1  -7  189.34    5.64
  -4  -1  -8 1299.46   32.68
  -4  -1  -9   42.83    3.38
  -4  -1 -10    2.25    3.38
  -4  -1 -11   95.80    5.64
   4   1  12  622.12   39.45
  -4  -1 -12  672.84   23.67
   4   1  13  210.75   19.16
  -4  -1 -13  225.41    9.02
   4   1  14    4.51   11.27
  -4  -1 -14   16.91    9.02
   4   1  15   -7.89   12.40
  -4  -1 -15   19.16   12.40
   4   1  16  701.01   42.83
  -4  -1 -16  669.46   37.19
   4   1  17   66.49   12.40
  -4  -1 -17   80.02   16.91
   4   1  18    2.25   11.27
  -4  -1 -18   10.14   16.91
   4   1  19   68.75   11.27
  -4  -1 -19   80.02   21.41
   4   1  20  518.43   22.54
  -4  -1 -20  535.34   25.92
   4   1  21   51.84   15.78
  -4  -1 -21   65.37   19.16
   4   1  22    9.02   11.27
  -4  -1 -22   16.91   19.16
   4   1  23   -3.38   13.52
  -4  -1 -23  -33.81   18.03
   4   1  24  197.23   22.54
  -4  -1 -24  201.74   28.18
  -4  -2  26  104.81   19.16
  -4  -2  25   23.67   22.54
   4   2 -24  220.90   15.78
  -4  -2  24  223.15   21.41
   4   2 -23  360.65   23.67
  -4  -2  23  342.62   13.52
   4   2 -22   91.29    6.76
  -4  -2  22  100.31    9.02
   4   2 -21   -6.76    3.38
  -4  -2  21    3.38    3.38
   4   2 -20  148.77    6.76
  -4  -2  20  158.91    6.76
   4   2 -19  581.55   14.65
  -4  -2  19  569.15   18.03
   4   2 -18  205.12    6.76
  -4  -2  18  198.36    9.02
   4   2 -17   15.78    3.38
  -4  -2  17   24.79    3.38
   4   2 -16   71.00    3.38
  -4  -2  16   73.26    4.51
   4   2 -15  530.83   13.52
  -4  -2  15  554.50   16.91
   4   2 -14  596.20   13.52
  -4  -2  14  581.55   16.91
   4   2 -13   12.40    2.25
  -4  -2  13    5.64    1.13
  -4  -2  12  107.07    3.38
   4   2 -11  859.92   30.43
  -4  -2  11  799.06   20.29
   4   2 -10 1081.95   41.70
  -4  -2  10 1098.85   24.79
   4   2  -9   42.83    5.64
  -4  -2   9   46.21    2.25
   4   2  -8  243.44   11.27
  -4  -2   8  253.58    6.76
   4   2  -7 1341.16   45.08
  -4  -2   7 1386.25   36.06
   4   2  -6 1261.15   24.79
  -4  -2   6 1234.10   46.21
   4   2  -5    5.64    2.25
  -4  -2   5    0.00    2.25
   4   2  -4  793.43   28.18
  -4  -2   4  823.86   30.43
   4   2  -3  689.74   24.79
  -4  -2   3  719.04   25.92
   4   2  -2  202.87    7.89
  -4  -2   2  214.14    9.02
  -4  -2   1  182.58    7.89
  -4  -2   0  666.07   23.67
  -4  -2  -1   27.05    2.25
  -4  -2  -2 1478.66   48.46
  -4  -2  -4   52.97    2.25
  -4  -2  -5  998.55   34.94
  -4  -2  -6 1164.22   39.45
  -4  -2  -7  272.74   11.27
  -4  -2  -8  127.35    6.76
  -4  -2  -9  524.07   20.29
  -4  -2 -10  546.61   22.54
  -4  -2 -11   38.32    5.64
   4   2  12    6.76    9.02
  -4  -2 -12   -4.51    4.51
   4   2  13  235.55   20.29
  -4  -2 -13  245.69   10.14
   4   2  14  744.97   36.06
  -4  -2 -14  787.79   24.79
   4   2  15  139.75   18.03
  -4  -2 -15  138.62    7.89
   4   2  16   24.79   14.65
  -4  -2 -16    0.00    5.64
   4   2  17  280.63   21.41
  -4  -2 -17  357.27   27.05
   4   2  18  244.57   20.29
  -4  -2 -18  288.52   23.67
   4   2  19  180.32   13.52
  -4  -2 -19  157.78   20.29
   4   2  20    2.25    9.02
  -4  -2 -20   10.14   11.27
   4   2  21   45.08   14.65
  -4  -2 -21   28.18   18.03
   4   2  22  269.36   25.92
  -4  -2 -22  276.12   25.92
   4   2  23   23.67   19.16
  -4  -2 -23   31.56   13.52
   4   2  24   12.40   18.03
  -4  -2 -24    1.13   14.65
  -4  -3  26   29.30   12.40
  -4  -3  25  406.86   27.05
  -4  -3  24   37.19   11.27
  -4  -3  23    6.76    5.64
   4   3 -22   36.06    5.64
  -4  -3  22   37.19    6.76
   4   3 -21  471.10   13.52
  -4  -3  21  473.35   13.52
   4   3 -20   29.30    3.38
  -4  -3  20   36.06    4.51
   4   3 -19   16.91    3.38
  -4  -3  19    9.02    9.02
   4   3 -18  102.56    4.51
  -4  -3  18   89.04    5.64
   4   3 -17  757.36   22.54
  -4  -3  17  739.33   21.41
   4   3 -16  277.25    7.89
  -4  -3  16  280.63   10.14
   4   3 -15    3.38    2.25
  -4  -3  15    5.64    2.25
   4   3 -14  125.10    5.64
  -4  -3  14  118.34    5.64
   4   3 -13  793.43   21.41
  -4  -3  13  811.46   16.91
   4   3 -12  142.01    9.02
  -4  -3  12  137.50    4.51
   4   3 -11    3.38    4.51
  -4  -3  11    2.25    1.13
   4   3 -10   25.92    6.76
  -4  -3  10   34.94    2.25
   4   3  -9  822.73   30.43
  -4  -3   9  803.57   15.78
   4   3  -8  119.47    6.76
  -4  -3   8  137.50    4.51
   4   3  -7   10.14    3.38
  -4  -3   7   12.40    1.13
   4   3  -6  538.72   14.65
  -4  -3   6  538.72   14.65
   4   3  -5 1531.63   30.43
  -4  -3   5 1532.76   52.97
   4   3  -4  272.74    9.02
  -4  -3   4  289.65   11.27
   4   3  -3  282.88   14.65
  -4  -3   3  297.54   11.27
  -4  -3   2  400.10   14.65
  -4  -3   1 2332.95   78.89
  -4  -3   0   11.27    2.25
  -4  -3  -6   39.45    3.38
  -4  -3  -7  955.72   23.67
  -4  -3  -8  741.58   19.16
  -4  -3  -9  113.83    4.51
  -4  -3 -10    4.51    2.25
   4   3  11  394.46   24.79
  -4  -3 -11  455.32   20.29
   4   3  12  110.45   14.65
  -4  -3 -12  122.85    9.02
   4   3  13  453.07   25.92
  -4  -3 -13  459.83   12.40
   4   3  14   11.27   10.14
  -4  -3 -14   14.65    5.64
   4   3  15  333.60   24.79
  -4  -3 -15  326.84   12.40
   4   3  16   80.02   16.91
  -4  -3 -16   98.05    7.89
   4   3  17  346.00   23.67
  -4  -3 -17  348.25   14.65
   4   3  18   -3.38   15.78
  -4  -3 -18    0.00    6.76
   4   3  19  302.04   18.03
  -4  -3 -19  250.20   10.14
   4   3  20  112.70   16.91
  -4  -3 -20  123.97   14.65
   4   3  21  187.09   22.54
  -4  -3 -21  162.29   21.41
   4   3  22   24.79   16.91
  -4  -3 -22   -6.76   12.40
   4   3  23   78.89   21.41
  -4  -3 -23   77.76   20.29
   4   3  24   66.49   21.41
  -4  -3 -24   18.03   21.41
  -4  -4  26   -5.64   11.27
  -4  -4  25   29.30   16.91
  -4  -4  24    6.76   11.27
  -4  -4  23  635.64   22.54
   4   4 -22    0.00    4.51
  -4  -4  22   -6.76    5.64
   4   4 -21    2.25    3.38
  -4  -4  21    3.38    3.38
   4   4 -20    2.25    3.38
  -4  -4  20   12.40    4.51
   4   4 -19  606.34   19.16
  -4  -4  19  596.20   20.29
   4   4 -18   -4.51    7.89
  -4  -4  18   -6.76    3.38
   4   4 -17   33.81    3.38
  -4  -4  17   43.95    4.51
   4   4 -16   41.70    3.38
  -4  -4  16   47.34    3.38
   4   4 -15  549.99   16.91
  -4  -4  15  574.78   13.52
   4   4 -14   16.91    2.25
  -4  -4  14   15.78    3.38
   4   4 -13   81.15   10.14
  -4  -4  13   77.76    4.51
   4   4 -12   15.78    2.25
  -4  -4  12    7.89    3.38
   4   4 -11  793.43   32.68
  -4  -4  11  785.54   15.78
   4   4 -10   37.19    7.89
  -4  -4  10   30.43    3.38
   4   4  -9   85.65    6.76
  -4  -4   9   87.91    3.38
   4   4  -8   22.54    6.76
  -4  -4   8   21.41    2.25
   4   4  -7 1359.20   47.34
  -4  -4   7 1409.91   29.30
   4   4  -6   84.53    5.64
  -4  -4   6   84.53    4.51
   4   4  -5   65.37    3.38
  -4  -4   5   65.37    5.64
   4   4  -4  199.48    7.89
  -4  -4   4  198.36   10.14
   4   4  -3 1075.19   61.99
  -4  -4   3 1866.36   49.59
  -4  -4   2   28.18    2.25
  -4  -4  -7  577.04   22.54
  -4  -4  -8   83.40    5.64
  -4  -4  -9  555.63   14.65
  -4  -4 -10   -2.25    2.25
   4   4  11  240.06   19.16
  -4  -4 -11  263.72    7.89
   4   4  12   12.40    7.89
  -4  -4 -12    4.51    3.38
   4   4  13  689.74   36.06
  -4  -4 -13  657.06   15.78
   4   4  14   -4.51    7.89
  -4  -4 -14    5.64    3.38
   4   4  15  397.84   28.18
  -4  -4 -15  405.73   12.40
   4   4  16    5.64   10.14
  -4  -4 -16   -3.38    5.64
   4   4  17  243.44   21.41
  -4  -4 -17  249.07   11.27
   4   4  18  -23.67   15.78
  -4  -4 -18   -4.51    5.64
   4   4  19  346.00   20.29
  -4  -4 -19  368.54   13.52
   4   4  20    5.64   11.27
  -4  -4 -20    3.38    5.64
   4   4  21  214.14   24.79
  -4  -4 -21  188.21    7.89
   4   4  22    6.76   16.91
  -4  -4 -22   24.79   19.16
   4   4  23  211.88   20.29
  -4  -4 -23  237.80   29.30
  -4  -5  26   -7.89   15.78
  -4  -5  25  375.30   25.92
  -4  -5  24   57.48   16.91
  -4  -5  23    4.51    6.76
   4   5 -22   28.18    5.64
  -4  -5  22   23.67    6.76
   4   5 -21  420.38   19.16
  -4  -5  21  405.73   15.78
   4   5 -20   15.78    4.51
  -4  -5  20   25.92    4.51
  -4  -5  19    2.25    3.38
   4   5 -18   20.29    4.51
  -4  -5  18   28.18    3.38
   4   5 -17  358.40   16.91
  -4  -5  17  370.79   10.14
   4   5 -16   82.27    6.76
  -4  -5  16   85.65    5.64
   4   5 -15   11.27    3.38
  -4  -5  15    9.02    4.51
   4   5 -14   91.29    5.64
  -4  -5  14   92.42    5.64
   4   5 -13  565.77   25.92
  -4  -5  13  662.69   20.29
  -4  -5  12  140.88    6.76
  -4  -5  11   40.57    2.25
  -4  -5  10  109.32    3.38
  -4  -5   9  455.32   12.40
  -4  -5   8    3.38    1.13
  -4  -5   7   20.29    2.25
  -4  -5   6  147.64    5.64
   4   5  -5 1231.84   33.81
  -4  -5   5 1266.78   47.34
   4   5  -4 1110.12   33.81
  -4  -5   4 1147.32   31.56
  -4  -5   3  471.10   20.29
  -4  -5   2   10.14    3.38
   4   5  -1  986.15   42.83
   4   5   6   25.92    6.76
  -4  -5  -8  388.82   15.78
  -4  -5  -9  526.32   20.29
  -4  -5 -10    2.25    2.25
   4   5  11  639.03   32.68
  -4  -5 -11  673.96   18.03
   4   5  12   47.34   10.14
  -4  -5 -12   32.68    3.38
   4   5  13  286.27   21.41
  -4  -5 -13  279.50    9.02
   4   5  14   -3.38    9.02
  -4  -5 -14    1.13    4.51
   4   5  15  430.53   29.30
  -4  -5 -15  417.00   12.40
   4   5  16  173.56   18.03
  -4  -5 -16  166.80    7.89
   4   5  17  273.87   24.79
  -4  -5 -17  304.30   12.40
  -4  -5 -18   -9.02    6.76
   4   5  19  187.09   14.65
  -4  -5 -19  176.94   10.14
   4   5  20   57.48   14.65
  -4  -5 -20   60.86    6.76
   4   5  21  285.14   28.18
  -4  -5 -21  252.45   12.40
   4   5  22    7.89   13.52
  -4  -5 -22   -9.02   14.65
   4   5  23  105.94   16.91
  -4  -5 -23  120.59   22.54
  -4  -6  26   65.37   18.03
  -4  -6  25    2.25   18.03
  -4  -6  24  173.56   15.78
  -4  -6  23  217.52   12.40
   4   6 -22  192.72   10.14
  -4  -6  22  181.45   12.40
   4   6 -21    1.13    5.64
  -4  -6  21   10.14    6.76
   4   6 -20  108.19    6.76
  -4  -6  20  108.19    5.64
   4   6 -19  265.98   12.40
  -4  -6  19  251.33    7.89
   4   6 -18  153.28    7.89
  -4  -6  18  142.01    5.64
   4   6 -17   -2.25    3.38
  -4  -6  17   -2.25    4.51
   4   6 -16  143.13    9.02
  -4  -6  16  144.26    6.76
   4   6 -15  325.71   15.78
  -4  -6  15  355.01   13.52
   4   6 -14  553.37   23.67
  -4  -6  14  568.02   18.03
  -4  -6  13   59.73    4.51
  -4  -6  12   24.79    4.51
  -4  -6  11  387.70    9.02
  -4  -6  10 1115.76   24.79
  -4  -6   9   50.72    3.38
  -4  -6   8   51.84    3.38
  -4  -6   7  314.44   10.14
  -4  -6   6  614.23   18.03
   4   6  -5  103.69    7.89
  -4  -6   5   99.18    4.51
  -4  -6   4  148.77   10.14
   4   6  -3  693.12   80.02
  -4  -6   3  565.77   19.16
   4   6  -2  568.02   25.92
  -4  -6   2  583.80   18.03
   4   6  -1  713.41   29.30
   4   6   0   10.14    4.51
   4   6   1  673.96   31.56
   4   6   2  524.07   25.92
   4   6   4    5.64    4.51
   4   6   6  340.36   27.05
   4   6   7  119.47   12.40
   4   6   8   90.16   11.27
  -4  -6  -9  217.52   11.27
   4   6  10  451.94   28.18
  -4  -6 -10  511.67   21.41
   4   6  11  288.52   20.29
  -4  -6 -11  284.01   13.52
   4   6  12   69.88   14.65
  -4  -6 -12   57.48    4.51
   4   6  13  503.78   29.30
  -4  -6 -13  515.05   13.52
   4   6  14  525.20   29.30
  -4  -6 -14  534.21   13.52
   4   6  15  243.44   22.54
  -4  -6 -15  244.57    7.89
   4   6  16    3.38   10.14
  -4  -6 -16    1.13    3.38
   4   6  17  130.74   20.29
  -4  -6 -17  119.47    7.89
   4   6  18  209.63   14.65
  -4  -6 -18  215.26   10.14
   4   6  19  157.78   19.16
  -4  -6 -19  171.31   10.14
   4   6  20    0.00   14.65
  -4  -6 -20    4.51    5.64
   4   6  21  129.61   21.41
  -4  -6 -21  127.35   11.27
   4   6  22  208.50   22.54
  -4  -6 -22  237.80   29.30
   4   6  23  136.37   23.67
  -4  -6 -23  161.17   25.92
  -4  -7  25   56.35   13.52
  -4  -7  24  172.44   22.54
  -4  -7  23   14.65    9.02
  -4  -7  22  315.57   15.78
  -4  -7  21   56.35    7.89
   4   7 -20  322.33   15.78
  -4  -7  20  324.58    9.02
   4   7 -19   -3.38    4.51
  -4  -7  19   -2.25    4.51
   4   7 -18  229.91   12.40
  -4  -7  18  227.66    6.76
   4   7 -17  153.28    9.02
  -4  -7  17  165.67    6.76
  -4  -7  16  557.88   19.16
   4   7 -15    5.64    3.38
  -4  -7  15   11.27    4.51
  -4  -7  14  509.42   13.52
  -4  -7  13   23.67    4.51
  -4  -7  12  880.21   20.29
  -4  -7  11   23.67    3.38
  -4  -7  10   77.76    3.38
  -4  -7   9   84.53    4.51
  -4  -7   8 1255.51   28.18
  -4  -7   7   57.48    4.51
  -4  -7   6  407.98   10.14
   4   7  -5  268.23   14.65
  -4  -7   5  288.52   10.14
   4   7  -4 1287.07   38.32
  -4  -7   3  412.49   15.78
   4   7  -2  125.10    9.02
  -4  -7   2  103.69   10.14
   4   7  -1   15.78    5.64
   4   7   0 1072.93   41.70
   4   7   1   72.13    9.02
   4   7   2   50.72    7.89
   4   7   3  100.31   12.40
  -4  -7  -4 1548.54   66.49
   4   7   5  367.41   20.29
   4   7   6   21.41    6.76
   4   7   7  272.74   21.41
   4   7   8 1031.23   56.35
  -4  -7  -8 3732.72  253.58
  -4  -7  -9   57.48   11.27
   4   7  10    3.38    9.02
  -4  -7 -10    2.25    3.38
   4   7  11   63.11   14.65
  -4  -7 -11   80.02    6.76
   4   7  12  770.89   41.70
  -4  -7 -12  777.65   23.67
   4   7  13  100.31   16.91
  -4  -7 -13  104.81    5.64
   4   7  14   -4.51    7.89
  -4  -7 -14    0.00    3.38
   4   7  15   80.02   16.91
  -4  -7 -15   63.11    5.64
   4   7  16  489.13   31.56
  -4  -7 -16  482.37   13.52
   4   7  17  151.02   19.16
  -4  -7 -17  122.85    6.76
   4   7  18   16.91   11.27
  -4  -7 -18    0.00    5.64
   4   7  19   31.56   12.40
  -4  -7 -19   18.03    5.64
   4   7  20  427.14   31.56
  -4  -7 -20  380.94   15.78
   4   7  21   47.34   14.65
  -4  -7 -21   42.83    9.02
   4   7  22   -5.64   18.03
  -4  -7 -22    4.51   13.52
   4   7  23   55.22   19.16
  -4  -7 -23   39.45   22.54
  -4  -8  25    5.64   11.27
  -4  -8  24  170.18   21.41
  -4  -8  23  -13.52    9.02
  -4  -8  22  251.33   13.52
  -4  -8  21   -7.89    4.51
   4   8 -20  305.42   14.65
  -4  -8  20  290.77   10.14
   4   8 -19   13.52    5.64
  -4  -8  19   14.65    3.38
   4   8 -18  437.29   19.16
  -4  -8  18  418.13   10.14
  -4  -8  17   14.65    3.38
  -4  -8  16  847.53   21.41
  -4  -8  15   -2.25    3.38
  -4  -8  14  795.68   20.29
  -4  -8  13    2.25    4.51
  -4  -8  12   20.29    4.51
  -4  -8  11   -1.13    2.25
  -4  -8  10 1039.12   19.16
  -4  -8   9   -2.25    2.25
  -4  -8   8  671.71   14.65
  -4  -8   7   92.42    5.64
  -4  -8   6 1341.16   37.19
   4   8  -5  170.18   32.68
  -4  -8   5  122.85    5.64
   4   8  -4   84.53   20.29
  -4  -8   4  193.85    7.89
   4   8  -3   20.29    4.51
  -4  -8   3   21.41    3.38
  -4  -8   2 1745.77   58.61
   4   8  -1   58.61    6.76
  -4  -8   1   54.10    5.64
   4   8   0   15.78    5.64
  -4  -8   0   12.40    5.64
   4   8   1   16.91    5.64
   4   8   2  850.91   39.45
  -4  -8  -4   16.91    7.89
   4   8   5  122.85   13.52
  -4  -8  -5  109.32   12.40
   4   8   6 1619.54   69.88
  -4  -8  -6 1452.74   69.88
   4   8   7    7.89    6.76
  -4  -8  -9   -3.38    6.76
   4   8  10 1110.12   52.97
  -4  -8 -10 1066.17   32.68
   4   8  11   76.64   13.52
  -4  -8 -11   52.97    6.76
   4   8  12   -5.64   12.40
  -4  -8 -12    1.13   10.14
   4   8  13    5.64   12.40
  -4  -8 -13    6.76    5.64
   4   8  14  726.93   38.32
  -4  -8 -14  758.49   20.29
   4   8  15    6.76    6.76
  -4  -8 -15    7.89    4.51
   4   8  16   11.27   16.91
  -4  -8 -16   -3.38    4.51
   4   8  17   -7.89   12.40
  -4  -8 -17   -5.64    5.64
   4   8  18  589.44   33.81
  -4  -8 -18  561.26   14.65
   4   8  19   22.54   11.27
  -4  -8 -19   -4.51    6.76
   4   8  20   25.92   16.91
  -4  -8 -20   22.54    4.51
   4   8  21    2.25   12.40
  -4  -8 -21    0.00    9.02
   4   8  22  370.79   32.68
  -4  -8 -22  325.71   29.30
   4   8  23    1.13   13.52
  -4  -8 -23  -11.27   14.65
  -4  -9  25   28.18   12.40
  -4  -9  24  192.72   20.29
  -4  -9  23    0.00   10.14
  -4  -9  22  281.76   14.65
   4   9 -21   74.38    7.89
  -4  -9  21   63.11    6.76
   4   9 -20  202.87   12.40
  -4  -9  20  209.63   10.14
  -4  -9  19    9.02    4.51
  -4  -9  18  306.55   10.14
   4   9 -17   91.29    7.89
  -4  -9  17   91.29    5.64
   4   9 -16  497.02   21.41
  -4  -9  16  478.99   13.52
  -4  -9  15   21.41    3.38
  -4  -9  14  356.14   12.40
  -4  -9  13  196.10    7.89
  -4  -9  12  529.70   12.40
  -4  -9  11   -1.13    3.38
  -4  -9  10  198.36    6.76
  -4  -9   9   55.22    3.38
  -4  -9   8 1164.22   23.67
  -4  -9   7   57.48    4.51
   4   9  -6  148.77   11.27
  -4  -9   6  140.88    5.64
  -4  -9   5  400.10   12.40
   4   9  -4 1734.50   77.76
  -4  -9   4 1852.84   49.59
   4   9  -3    6.76    3.38
  -4  -9   3   11.27    3.38
   4   9  -2   47.34    6.76
  -4  -9   2   67.62    7.89
   4   9  -1  100.31    9.02
   4   9   0  439.54   21.41
   4   9   1   30.43    7.89
  -4  -9  -3  512.80   27.05
  -4  -9  -4 1209.30   49.59
   4   9   5   15.78    9.02
  -4  -9  -5   15.78    6.76
   4   9   6    4.51    6.76
  -4  -9  -6   21.41    6.76
   4   9   7   80.02   15.78
   4   9   8  868.94   38.32
  -4  -9  -9   37.19   11.27
   4   9  10    5.64   11.27
  -4  -9 -10    6.76    7.89
   4   9  11   31.56   13.52
  -4  -9 -11   32.68    4.51
   4   9  12  957.97   49.59
  -4  -9 -12  884.72   29.30
   4   9  13    2.25   13.52
  -4  -9 -13    4.51    5.64
   4   9  14   49.59   15.78
  -4  -9 -14   34.94    5.64
   4   9  15   71.00   10.14
  -4  -9 -15   61.99    7.89
   4   9  16  664.95   34.94
  -4  -9 -16  680.73   18.03
   4   9  17   32.68   14.65
  -4  -9 -17   37.19    5.64
   4   9  18  -11.27   14.65
  -4  -9 -18   -1.13    5.64
   4   9  19   20.29   12.40
  -4  -9 -19   16.91    6.76
   4   9  20  373.05   32.68
  -4  -9 -20  374.17   15.78
   4   9  21   18.03   19.16
   4   9  22  -19.16   18.03
  -4  -9 -22    7.89   21.41
  -4 -10  24   86.78   20.29
  -4 -10  23   99.18   12.40
  -4 -10  22  184.83   13.52
   4  10 -21    5.64    6.76
  -4 -10  21   -9.02    5.64
   4  10 -20  154.40   11.27
  -4 -10  20  114.96    9.02
   4  10 -19  148.77   11.27
  -4 -10  19  139.75    7.89
  -4 -10  18  254.71    9.02
  -4 -10  17    3.38    3.38
   4  10 -16  178.07   12.40
  -4 -10  16  172.44    6.76
  -4 -10  15  428.27   11.27
  -4 -10  14  105.94    5.64
  -4 -10  13    3.38    3.38
  -4 -10  12  325.71   10.14
  -4 -10  11  583.80   16.91
  -4 -10  10  539.85   12.40
  -4 -10   9    2.25    3.38
  -4 -10   8   60.86    3.38
  -4 -10   7  591.69   14.65
  -4 -10   6  668.33   16.91
  -4 -10   5    2.25    3.38
  -4 -10   4   34.94    9.02
  -4 -10   3  751.73   19.16
   4  10  -2  484.62   19.16
   4  10  -1   15.78    5.64
   4  10   0  192.72   13.52
   4  10   1  738.20   32.68
   4  10   2  906.13   43.95
   4  10   3  -49.59   29.30
  -4 -10  -3   40.57   10.14
  -4 -10  -4   28.18    9.02
   4  10   5  560.13   29.30
  -4 -10  -5  590.56   32.68
   4  10   6  574.78   28.18
  -4 -10  -6  566.90   23.67
   4  10   7  123.97   15.78
  -4 -10  -7  151.02   32.68
   4  10   8  -19.16   34.94
  -4 -10  -8   18.03    7.89
   4  10   9  105.94   14.65
  -4 -10  -9  116.08   12.40
   4  10  10  615.36   33.81
  -4 -10 -10  504.91   30.43
   4  10  11  228.79   15.78
  -4 -10 -11  222.02   11.27
   4  10  12 -281.76   77.76
  -4 -10 -12   -2.25    4.51
   4  10  13  457.57   20.29
  -4 -10 -13  448.56   16.91
   4  10  14  445.18   22.54
  -4 -10 -14  457.57   18.03
   4  10  15  176.94   14.65
  -4 -10 -15  167.93   12.40
   4  10  16   -1.13    7.89
  -4 -10 -16   -4.51    5.64
   4  10  17   89.04   14.65
  -4 -10 -17   72.13    6.76
   4  10  18  324.58   28.18
  -4 -10 -18  290.77   11.27
   4  10  19   65.37   20.29
  -4 -10 -19   74.38    9.02
   4  10  20   20.29   13.52
  -4 -10 -20   -1.13    7.89
   4  10  21   54.10   19.16
  -4 -10 -21   11.27   15.78
   4  10  22  232.17   20.29
  -4 -10 -22  242.31   30.43
  -4 -11  24   28.18   18.03
  -4 -11  23   -2.25    7.89
  -4 -11  22   67.62   10.14
   4  11 -21  288.52   16.91
  -4 -11  21  351.63   18.03
   4  11 -20   49.59    7.89
  -4 -11  20   29.30    7.89
   4  11 -19    9.02    6.76
  -4 -11  19   -1.13    7.89
   4  11 -18   61.99    9.02
  -4 -11  18   50.72    7.89
   4  11 -17  534.21   24.79
  -4 -11  17  537.59   12.40
  -4 -11  16   56.35    4.51
  -4 -11  15    0.00    4.51
  -4 -11  14  107.07    4.51
  -4 -11  13  836.26   18.03
  -4 -11  12  130.74    7.89
  -4 -11  11   24.79    4.51
  -4 -11  10   93.54    4.51
  -4 -11   9  814.84   18.03
  -4 -11   8  201.74    6.76
  -4 -11   7   47.34    3.38
  -4 -11   6   24.79    3.38
  -4 -11   5 1129.28   30.43
  -4 -11   4  458.70   18.03
  -4 -11   3  143.13    9.02
   4  11  -2   77.76    9.02
  -4 -11   2   72.13    9.02
   4  11  -1  614.23   27.05
   4  11   0  267.11   15.78
   4  11   1    0.00    7.89
   4  11   2   -4.51    5.64
   4  11   3 1054.90   42.83
  -4 -11  -3  991.79   48.46
   4  11   4  360.65   19.16
  -4 -11  -4  348.25   15.78
   4  11   5  143.13   12.40
  -4 -11  -5  188.21   16.91
   4  11   6   23.67    7.89
  -4 -11  -6    4.51    7.89
   4  11   7  735.95   36.06
  -4 -11  -7  690.87   36.06
   4  11   8  152.15   14.65
  -4 -11  -8  155.53   11.27
   4  11   9  501.53   29.30
  -4 -11  -9  469.97   21.41
   4  11  10   76.64   14.65
  -4 -11 -10   69.88   14.65
   4  11  11  347.12   30.43
  -4 -11 -11  361.78   16.91
   4  11  12  105.94   10.14
  -4 -11 -12   87.91    7.89
   4  11  13  220.90   14.65
  -4 -11 -13  220.90   11.27
   4  11  14  -11.27    7.89
  -4 -11 -14  -16.91    7.89
   4  11  15  373.05   18.03
  -4 -11 -15  387.70   16.91
   4  11  16  165.67   18.03
  -4 -11 -16  174.69   11.27
   4  11  17  226.53   21.41
  -4 -11 -17  231.04    9.02
   4  11  18   16.91   11.27
  -4 -11 -18   -3.38    4.51
   4  11  19  149.89   32.68
  -4 -11 -19  176.94    9.02
   4  11  20   73.26   20.29
  -4 -11 -20   36.06    6.76
   4  11  21  138.62   18.03
  -4 -11 -21  140.88   20.29
  -4 -12  24   -2.25   16.91
  -4 -12  23  285.14   22.54
  -4 -12  22    9.02    9.02
  -4 -12  21   13.52    9.02
  -4 -12  20    9.02    5.64
  -4 -12  19  475.61   19.16
  -4 -12  18   12.40    4.51
  -4 -12  17   -3.38    4.51
  -4 -12  16    0.00    4.51
  -4 -12  15  583.80   14.65
  -4 -12  14    3.38    3.38
  -4 -12  13   58.61    4.51
  -4 -12  12    6.76    3.38
  -4 -12  11  966.99   19.16
  -4 -12  10   11.27    3.38
  -4 -12   9   20.29    5.64
  -4 -12   8  109.32    5.64
  -4 -12   7 1119.14   29.30
  -4 -12   6    0.00    3.38
  -4 -12   5   41.70    4.51
  -4 -12   4   -7.89    3.38
  -4 -12   3 1391.88   43.95
  -4 -12   2    6.76    4.51
   4  12  -1  163.42   10.14
  -4 -12   1  144.26   13.52
   4  12   0   21.41    5.64
   4  12   1 1478.66   43.95
  -4 -12  -1 1351.31   63.11
   4  12   2    4.51    5.64
  -4 -12  -2   20.29    6.76
   4  12   3  139.75   14.65
  -4 -12  -3  126.23   10.14
  -4 -12  -4   -5.64    5.64
   4  12   5 1052.64   41.70
   4  12   6   11.27   10.14
   4  12   7  486.88   28.18
  -4 -12  -7  468.84   20.29
   4  12   8   21.41    7.89
  -4 -12  -8   34.94   10.14
   4  12   9  723.55   29.30
  -4 -12  -9  729.19   25.92
   4  12  10   28.18    7.89
  -4 -12 -10   25.92    9.02
   4  12  11  574.78   22.54
  -4 -12 -11  559.01   22.54
   4  12  12   10.14    6.76
  -4 -12 -12    0.00    6.76
   4  12  13  450.81   20.29
  -4 -12 -13  453.07   19.16
   4  12  14    5.64   10.14
  -4 -12 -14    2.25    5.64
   4  12  15  318.95   27.05
  -4 -12 -15  285.14   12.40
   4  12  16  -11.27   14.65
  -4 -12 -16   -1.13    6.76
   4  12  17  346.00   28.18
  -4 -12 -17  282.88   13.52
   4  12  18   -1.13   12.40
  -4 -12 -18    4.51    5.64
   4  12  19  261.47   23.67
  -4 -12 -19  262.60   14.65
   4  12  20    4.51   18.03
  -4 -12 -20   21.41   15.78
   4  12  21  121.72   19.16
  -4 -12 -21  111.58   20.29
  -4 -13  23   19.16   16.91
  -4 -13  22    5.64    7.89
  -4 -13  21  407.98   28.18
  -4 -13  20    7.89    5.64
  -4 -13  19    1.13    5.64
  -4 -13  18   25.92    5.64
  -4 -13  17  586.05   14.65
  -4 -13  16   55.22    7.89
  -4 -13  15   16.91    4.51
  -4 -13  14   63.11    4.51
  -4 -13  13  658.18   14.65
  -4 -13  12    0.00    3.38
  -4 -13  11   65.37    4.51
  -4 -13  10   -6.76    3.38
  -4 -13   9 1190.14   23.67
  -4 -13   8   14.65    3.38
  -4 -13   7   61.99    5.64
  -4 -13   6   -3.38    4.51
  -4 -13   5 1111.25   23.67
  -4 -13   4  166.80    9.02
  -4 -13   3   48.46    5.64
   4  13  -2   81.15   12.40
  -4 -13   2   60.86    6.76
   4  13  -1 1450.49   60.86
  -4 -13   1 1323.13   37.19
   4  13   0   93.54    9.02
  -4 -13   0   69.88   18.03
   4  13   1  109.32    7.89
  -4 -13  -1   91.29   18.03
   4  13   2   20.29   10.14
  -4 -13  -2    4.51    5.64
   4  13   3  611.98   21.41
  -4 -13  -3  582.67   33.81
   4  13   4    7.89    6.76
  -4 -13  -4   15.78    6.76
   4  13   5  419.25   19.16
  -4 -13  -5  430.53   27.05
   4  13   6   29.30    9.02
  -4 -13  -6   30.43    6.76
   4  13   7  658.18   29.30
  -4 -13  -7  668.33   24.79
   4  13   8   41.70    9.02
  -4 -13  -8   37.19    6.76
   4  13   9   82.27    9.02
  -4 -13  -9   89.04   16.91
   4  13  10   20.29    7.89
  -4 -13 -10   15.78    7.89
   4  13  11  803.57   29.30
  -4 -13 -11  726.93   27.05
   4  13  12    5.64    7.89
  -4 -13 -12    5.64   16.91
   4  13  13  219.77   13.52
  -4 -13 -13  203.99   11.27
   4  13  14  -11.27   13.52
  -4 -13 -14   -2.25    5.64
   4  13  15  263.72   24.79
  -4 -13 -15  259.22   12.40
   4  13  16   95.80   19.16
  -4 -13 -16   54.10    9.02
   4  13  17  331.35   28.18
  -4 -13 -17  238.93   13.52
   4  13  18    3.38   18.03
  -4 -13 -18    1.13    6.76
   4  13  19  227.66   23.67
  -4 -13 -19  194.98   12.40
   4  13  20   54.10   15.78
  -4 -13 -20   38.32   18.03
  -4 -14  22   52.97   18.03
  -4 -14  21    1.13   15.78
  -4 -14  20   85.65   12.40
  -4 -14  19  347.12   13.52
  -4 -14  18   72.13    7.89
  -4 -14  17   -4.51    5.64
  -4 -14  16   90.16    6.76
  -4 -14  15  278.38   11.27
  -4 -14  14  193.85    6.76
  -4 -14  13    0.00    4.51
  -4 -14  12   49.59    4.51
  -4 -14  11  284.01    9.02
  -4 -14  10   47.34    5.64
  -4 -14   9   -4.51    4.51
  -4 -14   8  143.13    6.76
  -4 -14   7  831.75   19.16
  -4 -14   6  357.27   11.27
  -4 -14   5  113.83    6.76
  -4 -14   4   90.16    7.89
  -4 -14   3  728.06   20.29
   4  14  -2  488.00   28.18
  -4 -14   2  503.78   14.65
   4  14  -1  187.09   16.91
  -4 -14   1  179.20   11.27
   4  14   0    3.38    7.89
  -4 -14   0    5.64    5.64
   4  14   1  832.87   29.30
  -4 -14  -1  826.11   29.30
   4  14   2  117.21    9.02
  -4 -14  -2  103.69   12.40
   4  14   3  256.96   13.52
  -4 -14  -3  245.69   19.16
   4  14   4   -9.02    5.64
  -4 -14  -4   -2.25    5.64
   4  14   5 1007.56   31.56
  -4 -14  -5  973.75   32.68
   4  14   6  538.72   21.41
  -4 -14  -6  447.43   21.41
   4  14   7  278.38   14.65
  -4 -14  -7  295.28   15.78
   4  14   8    0.00    7.89
   4  14   9  643.53   22.54
  -4 -14  -9  653.68   32.68
   4  14  10  102.56   13.52
  -4 -14 -10   96.92   19.16
   4  14  11   51.84   10.14
  -4 -14 -11   61.99   10.14
   4  14  12  -14.65   12.40
  -4 -14 -12    2.25   11.27
   4  14  13  191.59   22.54
  -4 -14 -13  155.53   10.14
   4  14  14  268.23   22.54
  -4 -14 -14  227.66   12.40
   4  14  15  126.23   15.78
  -4 -14 -15  116.08   10.14
   4  14  16  -12.40   11.27
  -4 -14 -16    7.89    7.89
   4  14  17  148.77   19.16
  -4 -14 -17  117.21   19.16
   4  14  18  170.18   20.29
  -4 -14 -18  170.18   24.79
   4  14  19  164.55   24.79
  -4 -14 -19  131.86   15.78
   4  14  20  -19.16   18.03
  -4 -14 -20   21.41   15.78
  -4 -15  22  164.55   18.03
  -4 -15  21   85.65   20.29
  -4 -15  20  164.55   21.41
  -4 -15  19   -4.51    7.89
  -4 -15  18  126.23   11.27
  -4 -15  17  173.56    9.02
  -4 -15  16  255.84    9.02
  -4 -15  15  -10.14    5.64
  -4 -15  14  122.85    7.89
  -4 -15  13  109.32    5.64
  -4 -15  12  598.45   14.65
  -4 -15  11   34.94    5.64
  -4 -15  10  180.32    7.89
  -4 -15   9  332.47   11.27
  -4 -15   8  564.64   14.65
  -4 -15   7   20.29    4.51
  -4 -15   6  155.53    7.89
  -4 -15   5  234.42    7.89
  -4 -15   4  478.99   13.52
  -4 -15   3   50.72    6.76
   4  15  -2   18.03    9.02
  -4 -15   2   18.03    5.64
   4  15  -1  245.69   21.41
  -4 -15   1  227.66   10.14
   4  15   0  538.72   27.05
  -4 -15   0  495.89   15.78
   4  15   1  108.19   14.65
  -4 -15  -1  104.81    7.89
   4  15   2   11.27    7.89
  -4 -15  -2    7.89    5.64
   4  15   3  214.14   13.52
  -4 -15  -3  201.74   12.40
   4  15   4  376.43   18.03
  -4 -15  -4  360.65   18.03
   4  15   5  163.42   12.40
  -4 -15  -5  126.23   12.40
   4  15   6   57.48   10.14
  -4 -15  -6   61.99    9.02
   4  15   7  350.51   16.91
  -4 -15  -7  350.51   23.67
   4  15   8  226.53   14.65
  -4 -15  -8  240.06   15.78
   4  15   9   13.52    7.89
  -4 -15  -9    3.38   11.27
   4  15  10   21.41   10.14
  -4 -15 -10   41.70   18.03
  -4 -15 -11   90.16   15.78
   4  15  12  298.66   25.92
  -4 -15 -12  298.66   16.91
   4  15  13    6.76   12.40
  -4 -15 -13   36.06   13.52
   4  15  14    1.13   10.14
  -4 -15 -14  -11.27   10.14
   4  15  15   40.57   18.03
  -4 -15 -15   52.97   19.16
   4  15  16  403.48   30.43
  -4 -15 -16  373.05   29.30
   4  15  17    6.76   18.03
  -4 -15 -17   33.81   21.41
   4  15  18   12.40   12.40
  -4 -15 -18   16.91   20.29
   4  15  19   65.37   16.91
  -4 -15 -19   58.61   19.16
  -4 -16  22  157.78   19.16
  -4 -16  21   -3.38   13.52
  -4 -16  20  178.07   19.16
  -4 -16  19   -5.64    7.89
  -4 -16  18  197.23   11.27
  -4 -16  17    2.25    7.89
  -4 -16  16  117.21    7.89
  -4 -16  15    1.13    5.64
  -4 -16  14  302.04   12.40
  -4 -16  13    6.76    5.64
  -4 -16  12  130.74    7.89
  -4 -16  11   72.13    5.64
  -4 -16  10  583.80   14.65
  -4 -16   9  166.80    7.89
  -4 -16   8  456.45   12.40
  -4 -16   7    7.89    4.51
  -4 -16   6  355.01   11.27
  -4 -16   5   -3.38    4.51
  -4 -16   4   90.16    6.76
   4  16  -3   30.43   12.40
  -4 -16   3   27.05    5.64
   4  16  -2  703.27   33.81
  -4 -16   2  654.80   19.16
   4  16  -1   19.16    9.02
  -4 -16   1    1.13    5.64
   4  16   0   68.75   12.40
  -4 -16   0   61.99    7.89
   4  16   1  -11.27    9.02
  -4 -16  -1   14.65    5.64
   4  16   2  652.55   36.06
  -4 -16  -2  673.96   20.29
   4  16   3   74.38    7.89
  -4 -16  -3   81.15    7.89
   4  16   4   45.08    7.89
  -4 -16  -4   46.21    9.02
   4  16   5    2.25    6.76
  -4 -16  -5  -15.78    7.89
   4  16   6 1136.05   41.70
  -4 -16  -6 1143.93   36.06
   4  16   7   13.52    9.02
  -4 -16  -7   21.41    7.89
   4  16   8   11.27    9.02
  -4 -16  -8   14.65   12.40
   4  16   9    3.38    9.02
  -4 -16  -9   25.92   18.03
   4  16  10  530.83   37.19
  -4 -16 -10  490.26   29.30
   4  16  11    9.02   11.27
  -4 -16 -11   43.95   20.29
   4  16  12   -2.25   11.27
  -4 -16 -12    5.64   13.52
   4  16  13  -16.91   15.78
  -4 -16 -13   19.16   20.29
   4  16  14  449.68   32.68
  -4 -16 -14  404.60   30.43
   4  16  15  -74.38   19.16
  -4 -16 -15   10.14   13.52
   4  16  16    2.25   13.52
  -4 -16 -16   29.30   20.29
  -4 -16 -17   10.14   22.54
   4  16  18  359.52   30.43
  -4 -16 -18  316.70   27.05
   4  16  19   -4.51   19.16
  -4 -16 -19   -3.38   22.54
  -4 -17  21   -3.38   18.03
  -4 -17  20  194.98   24.79
  -4 -17  19   23.67   16.91
  -4 -17  18  140.88   13.52
  -4 -17  17   10.14    9.02
  -4 -17  16  326.84   13.52
  -4 -17  15   -2.25    5.64
  -4 -17  14  135.24    7.89
  -4 -17  13   65.37    6.76
  -4 -17  12  566.90   15.78
  -4 -17  11   29.30    6.76
  -4 -17  10   59.73    6.76
  -4 -17   9   52.97    5.64
  -4 -17   8  365.16   14.65
  -4 -17   7   -2.25    4.51
  -4 -17   6  213.01    9.02
  -4 -17   5  130.74    7.89
  -4 -17   4  441.80   12.40
  -4 -17   3   15.78    4.51
   4  17  -2   42.83   11.27
  -4 -17   2   25.92    6.76
   4  17  -1   21.41   10.14
  -4 -17   1   22.54   11.27
   4  17   0  444.05   30.43
  -4 -17   0  413.62   15.78
   4  17   1   40.57   11.27
  -4 -17  -1   38.32    9.02
   4  17   2   27.05   10.14
  -4 -17  -2   30.43   10.14
   4  17   3   38.32   11.27
  -4 -17  -3   37.19    6.76
   4  17   4 1005.31   34.94
  -4 -17  -4 1049.26   28.18
   4  17   5  111.58   12.40
  -4 -17  -5  108.19   10.14
   4  17   6   20.29   10.14
  -4 -17  -6   12.40   11.27
   4  17   7   38.32    9.02
  -4 -17  -7   65.37   13.52
   4  17   8  685.23   39.45
  -4 -17  -8  655.93   29.30
   4  17   9  -13.52   14.65
  -4 -17  -9   16.91   12.40
   4  17  10    6.76   10.14
   4  17  11   42.83   13.52
  -4 -17 -11    6.76   16.91
   4  17  12  582.67   36.06
  -4 -17 -12  494.77   34.94
   4  17  13    2.25   11.27
  -4 -17 -13   16.91   13.52
   4  17  14   16.91   12.40
  -4 -17 -14   -3.38   13.52
   4  17  15   11.27   13.52
  -4 -17 -15   11.27   21.41
   4  17  16  339.24   28.18
  -4 -17 -16  394.46   31.56
   4  17  17   22.54   14.65
  -4 -17 -17   75.51   20.29
   4  17  18    1.13   14.65
  -4 -17 -18   18.03   21.41
  -4 -18  20   55.22   15.78
  -4 -18  19   82.27   16.91
  -4 -18  18  166.80   14.65
  -4 -18  17    1.13   11.27
  -4 -18  16   93.54   12.40
  -4 -18  15  163.42   11.27
  -4 -18  14  182.58   10.14
  -4 -18  13   36.06    9.02
  -4 -18  12  166.80    9.02
  -4 -18  11  295.28   12.40
  -4 -18  10  432.78   13.52
  -4 -18   9   28.18    7.89
  -4 -18   8   65.37    6.76
  -4 -18   7  449.68   13.52
  -4 -18   6  322.33   11.27
  -4 -18   5   41.70    5.64
  -4 -18   4   15.78    5.64
  -4 -18   3  311.06   12.40
   4  18  -2  364.03   23.67
  -4 -18   2  358.40   12.40
   4  18  -1   46.21   12.40
  -4 -18   1   31.56    7.89
   4  18   0   48.46   14.65
  -4 -18   0   80.02    7.89
   4  18   1  161.17   21.41
  -4 -18  -1  167.93   19.16
  -4 -18  -2  814.84   32.68
  -4 -18  -3  233.29   15.78
  -4 -18  -4    5.64    6.76
   4  18   5  219.77   21.41
  -4 -18  -5  245.69   13.52
   4  18   6  299.79   23.67
  -4 -18  -6  307.68   16.91
   4  18   7  101.43   15.78
  -4 -18  -7  125.10   20.29
   4  18   8   91.29   18.03
  -4 -18  -8   47.34   20.29
   4  18   9  146.51   18.03
   4  18  10  482.37   32.68
  -4 -18 -10  455.32   33.81
   4  18  11   95.80   16.91
  -4 -18 -11   57.48   16.91
   4  18  12   -5.64   12.40
  -4 -18 -12   11.27   20.29
   4  18  13  163.42   22.54
  -4 -18 -13  126.23   24.79
   4  18  14  402.35   30.43
  -4 -18 -14  378.68   28.18
   4  18  15  118.34   22.54
  -4 -18 -15   68.75   18.03
   4  18  16  -23.67   13.52
  -4 -18 -16  -13.52   22.54
   4  18  17   67.62   19.16
  -4 -18 -17  100.31   27.05
  -4 -19  19  -14.65   13.52
  -4 -19  18   33.81   15.78
  -4 -19  17  286.27   15.78
  -4 -19  16  128.48   13.52
  -4 -19  15   57.48   10.14
  -4 -19  14   22.54    9.02
  -4 -19  13  278.38   13.52
  -4 -19  12   90.16   10.14
  -4 -19  11   85.65    7.89
  -4 -19  10   76.64    9.02
  -4 -19   9  464.34   14.65
  -4 -19   8  241.18   10.14
  -4 -19   7   37.19    6.76
  -4 -19   6    5.64    6.76
  -4 -19   5  706.65   18.03
  -4 -19   4  148.77   11.27
  -4 -19   3  112.70    9.02
  -4 -19   2   -3.38    6.76
   4  19  -1  281.76   21.41
  -4 -19   1  268.23   11.27
   4  19   0  157.78   21.41
  -4 -19   0  129.61   10.14
   4  19   1  137.50   19.16
  -4 -19  -1  135.24   11.27
  -4 -19  -2   -9.02   15.78
  -4 -19  -3  447.43   21.41
   4  19   4   85.65   93.54
  -4 -19  -4  209.63   23.67
   4  19   5  128.48   71.00
  -4 -19  -5  276.12   23.67
   4  19   6   12.40   10.14
  -4 -19  -6   10.14   12.40
   4  19   7  537.59   32.68
  -4 -19  -7  468.84   30.43
   4  19   8  162.29   16.91
  -4 -19  -8  193.85   21.41
   4  19   9  185.96   24.79
  -4 -19  -9  192.72   23.67
   4  19  10   22.54   12.40
  -4 -19 -10    5.64   19.16
   4  19  11  325.71   28.18
  -4 -19 -11  343.74   28.18
   4  19  12  158.91   19.16
  -4 -19 -12  130.74   20.29
   4  19  13  127.35   19.16
  -4 -19 -13  111.58   21.41
   4  19  14  -21.41   13.52
  -4 -19 -14   -2.25   22.54
   4  19  15  165.67   25.92
  -4 -19 -15  127.35   28.18
   4  19  16  116.08   23.67
  -4 -19 -16  119.47   21.41
  -4 -20  18   25.92   15.78
  -4 -20  17   11.27    9.02
  -4 -20  16   -6.76   10.14
  -4 -20  15  386.57   19.16
  -4 -20  14    9.02   10.14
  -4 -20  13   38.32   10.14
  -4 -20  12   11.27    7.89
  -4 -20  11  633.39   21.41
  -4 -20  10   -4.51    7.89
  -4 -20   9   67.62   13.52
  -4 -20   8  -13.52    7.89
  -4 -20   7  601.83   18.03
  -4 -20   6    7.89    6.76
  -4 -20   5   -1.13   12.40
  -4 -20   4    7.89    7.89
  -4 -20   3  437.29   19.16
  -4 -20   2   19.16    9.02
  -4 -20   1  107.07   13.52
   4  20   0   23.67   14.65
  -4 -20   0   31.56   10.14
   4  20   1  499.27   36.06
   4  20   2   37.19   27.05
   4  20   3   67.62   43.95
  -4 -20  -3  140.88   21.41
   4  20   4   24.79   11.27
  -4 -20  -4  -16.91   12.40
   4  20   5  601.83   40.57
  -4 -20  -5  645.79   37.19
   4  20   6    1.13   16.91
  -4 -20  -6   -4.51   12.40
   4  20   7  196.10   20.29
  -4 -20  -7  148.77   25.92
   4  20   8   -5.64   12.40
  -4 -20  -8    5.64   12.40
   4  20   9  441.80   30.43
  -4 -20  -9  379.81   29.30
   4  20  10   52.97   14.65
  -4 -20 -10   20.29   23.67
   4  20  11  185.96   22.54
  -4 -20 -11  199.48   27.05
   4  20  12    2.25   21.41
  -4 -20 -12  -14.65   23.67
   4  20  13  216.39   27.05
  -4 -20 -13  226.53   27.05
   4  20  14   -1.13   15.78
  -4 -20 -14   15.78   15.78
   4  20  15  191.59   23.67
  -4 -20 -15  224.28   31.56
  -4 -21  17  308.81   27.05
  -4 -21  16   21.41   13.52
  -4 -21  15   14.65    9.02
  -4 -21  14   -2.25   10.14
  -4 -21  13  572.53   23.67
  -4 -21  12   23.67   11.27
  -4 -21  11   18.03   11.27
  -4 -21  10    5.64   10.14
  -4 -21   9  672.84   24.79
  -4 -21   8   81.15   13.52
  -4 -21   7   95.80   11.27
  -4 -21   6   20.29    9.02
  -4 -21   5  414.75   20.29
  -4 -21   4   54.10   11.27
  -4 -21   3   45.08   13.52
  -4 -21   2    0.00    7.89
  -4 -21   1  448.56   20.29
  -4 -21   0    5.64    9.02
   4  21   1   94.67   20.29
  -4 -21  -1   91.29   11.27
   4  21   2   23.67   13.52
  -4 -21  -2   31.56   14.65
   4  21   3  444.05   31.56
  -4 -21  -3  420.38   32.68
   4  21   4   49.59   15.78
  -4 -21  -4   40.57   20.29
   4  21   5  153.28   23.67
  -4 -21  -5  158.91   20.29
   4  21   6   20.29   19.16
  -4 -21  -6   21.41   14.65
   4  21   7  338.11   25.92
  -4 -21  -7  318.95   24.79
   4  21   8   39.45   19.16
  -4 -21  -8    6.76   14.65
   4  21   9  185.96   20.29
  -4 -21  -9  184.83   21.41
   4  21  10    1.13   20.29
  -4 -21 -10  -13.52   15.78
   4  21  11  246.82   23.67
  -4 -21 -11  190.47   28.18
   4  21  12   10.14   15.78
  -4 -21 -12  -31.56   23.67
   4  21  13  140.88   20.29
  -4 -21 -13  180.32   30.43
   4  21  14   25.92   21.41
  -4 -21 -14   19.16   18.03
  -4 -22  16   22.54   14.65
  -4 -22  15  304.30   19.16
  -4 -22  14   75.51   13.52
  -4 -22  13    0.00    9.02
  -4 -22  12   51.84   13.52
  -4 -22  11  511.67   23.67
  -4 -22  10  222.02   14.65
  -4 -22   9   51.84   12.40
  -4 -22   8   48.46   10.14
  -4 -22   7  271.61   22.54
  -4 -22   6  178.07   21.41
  -4 -22   5   12.40    9.02
  -4 -22   4   48.46   11.27
  -4 -22   3  342.62   18.03
  -4 -22   2  103.69   15.78
  -4 -22   1   38.32   11.27
  -4 -22   0   36.06   11.27
  -4 -22  -1  329.09   18.03
   4  22   2  198.36   20.29
  -4 -22  -2  191.59   14.65
   4  22   3   56.35   15.78
  -4 -22  -3   75.51   20.29
   4  22   4   34.94   14.65
  -4 -22  -4   32.68   15.78
   4  22   5  174.69   23.67
  -4 -22  -5  127.35   18.03
   4  22   6  155.53   20.29
  -4 -22  -6  149.89   20.29
   4  22   7   30.43   15.78
  -4 -22  -7   21.41   15.78
   4  22   8   33.81   15.78
  -4 -22  -8   47.34   18.03
   4  22   9  148.77   21.41
  -4 -22  -9  205.12   22.54
   4  22  10  120.59   19.16
  -4 -22 -10  101.43   22.54
   4  22  11  157.78   27.05
  -4 -22 -11  136.37   21.41
   4  22  12  -19.16   14.65
  -4 -22 -12    9.02   24.79
   4  22  13   60.86   19.16
  -4 -22 -13   51.84   27.05
  -4 -23  14   59.73   14.65
  -4 -23  13  117.21   13.52
  -4 -23  12  105.94   12.40
  -4 -23  11   -3.38   13.52
  -4 -23  10   76.64   12.40
  -4 -23   9  117.21   12.40
  -4 -23   8  352.76   20.29
  -4 -23   7   12.40   12.40
  -4 -23   6   76.64   12.40
  -4 -23   5   99.18   13.52
  -4 -23   4  271.61   18.03
  -4 -23   3   27.05   12.40
  -4 -23   2  105.94   15.78
  -4 -23   1  235.55   19.16
  -4 -23   0  371.92   21.41
  -4 -23  -1   24.79   11.27
  -4 -23  -2   87.91   12.40
   4  23   3   95.80   18.03
  -4 -23  -3   98.05   12.40
   4  23   4  362.90   28.18
  -4 -23  -4  314.44   59.73
   4  23   5   38.32   22.54
  -4 -23  -5   20.29   38.32
   4  23   6   41.70   18.03
  -4 -23  -6  111.58   20.29
   4  23   7  110.45   25.92
  -4 -23  -7  120.59   21.41
   4  23   8  329.09   27.05
  -4 -23  -8  276.12   25.92
   4  23   9    5.64   21.41
  -4 -23  -9   46.21   18.03
   4  23  10   81.15   20.29
  -4 -23 -10   67.62   20.29
   4  23  11    1.13   16.91
  -4 -23 -11   25.92   19.16
  -4 -24  13  -23.67   14.65
  -4 -24  12   75.51   14.65
  -4 -24  11   32.68   11.27
  -4 -24  10  339.24   21.41
  -4 -24   9    7.89   11.27
  -4 -24   8   85.65   14.65
  -4 -24   7    7.89   10.14
  -4 -24   6  285.14   20.29
  -4 -24   5   -5.64   12.40
  -4 -24   4   71.00   15.78
  -4 -24   3  -11.27   15.78
  -4 -24   2  455.32   22.54
  -4 -24   1  -11.27   12.40
  -4 -24   0   94.67   16.91
  -4 -24  -1    9.02   21.41
  -4 -24  -2  441.80   22.54
  -4 -24  -3   19.16   11.27
  -4 -24  -4   39.45   13.52
   4  24   5   23.67   22.54
  -4 -24  -5  -11.27   10.14
   4  24   6  176.94   25.92
  -4 -24  -6  181.45   23.67
   4  24   7   -1.13   23.67
  -4 -24  -7   -2.25   18.03
   4  24   8   55.22   16.91
  -4 -24  -8   51.84   19.16
   4  24   9   -5.64   21.41
  -4 -24  -9    9.02   16.91
   4  24  10  286.27   27.05
  -4 -25  10  101.43   13.52
  -4 -25   9   24.79   13.52
  -4 -25   8  260.34   18.03
  -4 -25   7   -9.02   15.78
  -4 -25   6   90.16   14.65
  -4 -25   5   61.99   22.54
  -4 -25   4  316.70   18.03
  -4 -25   3   -7.89   10.14
  -4 -25   2   78.89   14.65
  -4 -25   1   -5.64   13.52
  -4 -25   0  296.41   21.41
  -4 -25  -1   -6.76   13.52
  -4 -25  -2   31.56   13.52
  -4 -25  -3   10.14   13.52
  -4 -25  -4  385.44   24.79
  -4 -25  -5   -3.38   11.27
   4  25   6   34.94   18.03
  -4 -25  -6   18.03   13.52
   4  25   7   -9.02   23.67
  -4 -25  -7   10.14   12.40
   4  25   8  260.34   27.05
  -4 -26   8   50.72   14.65
  -4 -26   7   65.37   13.52
  -4 -26   6  152.15   16.91
  -4 -26   5   11.27   12.40
  -4 -26   4   21.41   14.65
  -4 -26   3  112.70   14.65
  -4 -26   2  155.53   15.78
  -4 -26   1    7.89   14.65
  -4 -26   0    5.64   18.03
  -4 -26  -1   73.26   15.78
  -4 -26  -2  145.39   15.78
  -4 -26  -3   41.70   14.65
  -4 -26  -4   12.40   16.91
  -4 -26  -5   68.75   19.16
   5   0 -26   -4.51   11.27
   5   0 -25  245.69   22.54
   5   0 -24   -5.64   16.91
   5   0 -23  136.37   14.65
   5   0 -22    1.13   10.14
   5   0 -21  756.24   16.91
   5   0 -20   -3.38    2.25
   5   0 -19   15.78    2.25
   5   0 -18    0.00    1.13
   5   0 -17  278.38    9.02
   5   0 -16   -3.38   10.14
   5   0 -15  397.84   20.29
   5   0 -14   -3.38    5.64
   5   0 -13 1572.21   55.22
   5   0 -12   19.16   10.14
   5   0 -11   91.29    7.89
   5   0 -10    1.13    4.51
   5   0  -9 2538.07   84.53
   5   0  -8    0.00    0.01
   5   0  -7   30.43    2.25
   5   0  -6    3.38    3.38
   5   0  -1 9999.00  320.08
   5   0   0    2.25    2.25
   5   0   1  437.29   15.78
   5   0  12  -13.52   10.14
   5   0  13  189.34   16.91
   5   0  14   -1.13    9.02
   5   0  15  873.45   40.57
   5   0  16    0.00   10.14
   5   0  17   32.68   10.14
   5   0  18    0.00   10.14
   5   0  19  335.85   29.30
   5   0  20   18.03   16.91
   5   0  21  128.48   22.54
   5   0  22    9.02   21.41
   5   0  23  323.46   32.68
   5   1 -26  -10.14   15.78
  -5  -1  26   -2.25   10.14
   5   1 -25   65.37   14.65
  -5  -1  25   76.64   14.65
   5   1 -24   69.88   13.52
  -5  -1  24   85.65   14.65
   5   1 -23  490.26   27.05
  -5  -1  23  525.20   25.92
   5   1 -22   25.92   15.78
  -5  -1  22   23.67    3.38
   5   1 -21  135.24   13.52
  -5  -1  21  132.99    4.51
   5   1 -20  121.72   16.91
  -5  -1  20   86.78    4.51
   5   1 -19  591.69   29.30
  -5  -1  19  595.07   14.65
   5   1 -18    2.25    9.02
  -5  -1  18   12.40    2.25
   5   1 -17   76.64   10.14
  -5  -1  17   83.40    3.38
   5   1 -16   94.67   11.27
  -5  -1  16   93.54    4.51
   5   1 -15 1257.76   43.95
  -5  -1  15 1305.10   28.18
   5   1 -14   65.37    7.89
  -5  -1  14   65.37    2.25
   5   1 -13   49.59    9.02
  -5  -1  13   51.84    2.25
   5   1 -12  247.95   14.65
  -5  -1  12  242.31   12.40
   5   1 -11 2294.63   81.15
  -5  -1  11 2217.99   74.38
   5   1 -10  161.17    9.02
  -5  -1  10  158.91    9.02
  -5  -1   9   14.65    2.25
  -5  -1   8    4.51    1.13
   5   1  -7 1087.58   28.18
  -5  -1   7 1182.25   42.83
  -5  -1   6    2.25    3.38
   5   1  -4  138.62    6.76
   5   1  -3 4118.16  132.99
   5   1  -2   12.40    2.25
   5   1  -1  104.81    5.64
   5   1   0   84.53    3.38
  -5  -1  -4   92.42    3.38
  -5  -1  -5 1812.26   59.73
  -5  -1  -6  271.61   10.14
  -5  -1  -7   41.70    3.38
   5   1  12   12.40   10.14
  -5  -1 -12    7.89    9.02
   5   1  13 1111.25   51.84
  -5  -1 -13 1083.07   49.59
   5   1  14   38.32   10.14
  -5  -1 -14   42.83   11.27
   5   1  15   18.03   11.27
  -5  -1 -15   15.78   10.14
   5   1  16  136.37   16.91
  -5  -1 -16  131.86   14.65
   5   1  17  766.38   28.18
  -5  -1 -17  774.27   29.30
   5   1  18  128.48   21.41
  -5  -1 -18   95.80   14.65
   5   1  19   68.75   20.29
  -5  -1 -19  111.58   19.16
   5   1  20   27.05   18.03
  -5  -1 -20    9.02   11.27
   5   1  21  385.44   29.30
  -5  -1 -21  426.02   32.68
   5   1  22    1.13   13.52
  -5  -1 -22   29.30   19.16
   5   1  23   83.40   18.03
  -5  -1 -23   34.94   22.54
  -5  -2  26  156.66   15.78
   5   2 -25  183.71   16.91
  -5  -2  25  173.56   15.78
   5   2 -24   -9.02   15.78
  -5  -2  24    1.13   12.40
   5   2 -23   94.67   13.52
  -5  -2  23   90.16   12.40
   5   2 -22  241.18   16.91
  -5  -2  22  261.47   10.14
   5   2 -21  245.69   20.29
  -5  -2  21  229.91    7.89
   5   2 -20   32.68   10.14
  -5  -2  20   27.05    3.38
   5   2 -19   63.11   10.14
  -5  -2  19   61.99    4.51
   5   2 -18  181.45   15.78
  -5  -2  18  170.18    6.76
   5   2 -17  701.01   28.18
  -5  -2  17  696.50   20.29
   5   2 -16   22.54   10.14
  -5  -2  16    7.89    3.38
   5   2 -15   78.89    7.89
  -5  -2  15   86.78    5.64
   5   2 -14  201.74   14.65
  -5  -2  14  182.58   10.14
   5   2 -13  554.50   22.54
  -5  -2  13  588.31   24.79
   5   2 -12  127.35   11.27
  -5  -2  12  119.47   11.27
   5   2 -11    6.76    5.64
  -5  -2  11    5.64    5.64
   5   2 -10  480.11   19.16
  -5  -2  10  495.89   12.40
   5   2  -9 1060.53   37.19
  -5  -2   9 1062.79   23.67
   5   2  -8  751.73   27.05
  -5  -2   8  774.27   22.54
   5   2  -7   63.11    3.38
  -5  -2   7   57.48    5.64
   5   2  -6  442.92   16.91
  -5  -2   6  457.57   20.29
   5   2  -5 1385.12   48.46
  -5  -2   5 1420.06   52.97
   5   2  -4  281.76   11.27
  -5  -2   4  297.54   13.52
   5   2  -3  468.84   18.03
  -5  -2   3  460.95   20.29
   5   2  -2 2477.21   82.27
  -5  -2   2 2596.67   89.04
   5   2  -1 1746.89   58.61
  -5  -2   1 1785.21   61.99
  -5  -2   0  190.47    7.89
  -5  -2  -1    7.89    1.13
  -5  -2  -5    6.76    2.25
  -5  -2  -6  246.82   10.14
  -5  -2  -7 1218.32   41.70
  -5  -2  -8  728.06   19.16
  -5  -2  -9   25.92    2.25
  -5  -2 -10  270.49    7.89
   5   2  11  459.83   29.30
  -5  -2 -11  471.10   19.16
   5   2  12  284.01   18.03
  -5  -2 -12  252.45   19.16
   5   2  13   89.04   15.78
  -5  -2 -13   81.15   13.52
   5   2  14    0.00    9.02
  -5  -2 -14   -2.25    7.89
   5   2  15  719.04   34.94
  -5  -2 -15  721.30   39.45
   5   2  16  207.37   21.41
  -5  -2 -16  176.94   20.29
   5   2  17   20.29   10.14
  -5  -2 -17   40.57   18.03
   5   2  18   91.29   14.65
  -5  -2 -18   55.22   13.52
   5   2  19  228.79   25.92
  -5  -2 -19  241.18   24.79
   5   2  20  198.36   22.54
  -5  -2 -20  167.93   19.16
   5   2  21   51.84   16.91
  -5  -2 -21   92.42   18.03
   5   2  22    7.89   19.16
  -5  -2 -22    9.02   12.40
   5   2  23  118.34   25.92
  -5  -2 -23  132.99   25.92
  -5  -3  26   21.41   16.91
  -5  -3  25   28.18   16.91
  -5  -3  24  349.38   29.30
  -5  -3  23  138.62   18.03
   5   3 -22   22.54   11.27
  -5  -3  22   43.95    6.76
   5   3 -21   19.16   11.27
  -5  -3  21   10.14    3.38
   5   3 -20  473.35   27.05
  -5  -3  20  460.95   12.40
   5   3 -19  101.43   12.40
  -5  -3  19  104.81    6.76
   5   3 -18   98.05   14.65
  -5  -3  18   77.76    6.76
   5   3 -17   18.03    7.89
  -5  -3  17   18.03    3.38
   5   3 -16  592.82   27.05
  -5  -3  16  608.60   18.03
   5   3 -15  291.90   14.65
  -5  -3  15  288.52   10.14
   5   3 -14  197.23   12.40
  -5  -3  14  226.53   12.40
   5   3 -13   25.92    9.02
  -5  -3  13   30.43    3.38
   5   3 -12 1045.88   38.32
  -5  -3  12 1050.39   24.79
   5   3 -11  123.97    9.02
  -5  -3  11  122.85    4.51
   5   3 -10  428.27   18.03
  -5  -3  10  405.73   11.27
   5   3  -9    0.00    4.51
  -5  -3   9    0.00    2.25
   5   3  -8  625.50   23.67
  -5  -3   8  673.96   15.78
   5   3  -7  599.58   15.78
  -5  -3   7  610.85   24.79
   5   3  -6  318.95   10.14
  -5  -3   6  335.85   14.65
   5   3  -5   33.81    4.51
  -5  -3   5   31.56    3.38
   5   3  -4  757.36   22.54
  -5  -3   4  805.83   29.30
  -5  -3   3  800.19   28.18
  -5  -3   2 1146.19   39.45
  -5  -3   1   10.14    2.25
  -5  -3   0  498.15   18.03
  -5  -3  -1 1493.31   49.59
  -5  -3  -2  511.67   19.16
  -5  -3  -5  334.73   12.40
  -5  -3  -6  793.43   20.29
  -5  -3  -7   15.78    4.51
  -5  -3  -8  484.62   18.03
  -5  -3  -9  132.99    4.51
  -5  -3 -10  476.73   12.40
   5   3  11   11.27   12.40
  -5  -3 -11   38.32    2.25
   5   3  12  139.75   14.65
  -5  -3 -12  147.64    5.64
   5   3  13  275.00   22.54
  -5  -3 -13  258.09   10.14
   5   3  14  297.54   20.29
  -5  -3 -14  307.68   12.40
   5   3  15   27.05   11.27
  -5  -3 -15   33.81    5.64
   5   3  16  240.06   23.67
  -5  -3 -16  232.17   24.79
   5   3  17   93.54   12.40
  -5  -3 -17  140.88   20.29
   5   3  18  471.10   23.67
  -5  -3 -18  463.21   23.67
   5   3  19   -3.38   11.27
  -5  -3 -19    6.76   15.78
   5   3  20   45.08   14.65
  -5  -3 -20   46.21   21.41
   5   3  21   86.78   22.54
  -5  -3 -21  146.51   23.67
   5   3  22  154.40   23.67
  -5  -3 -22  172.44   24.79
   5   3  23   -2.25   13.52
  -5  -3 -23    6.76   21.41
  -5  -4  26  302.04   21.41
  -5  -4  25    2.25   10.14
  -5  -4  24   11.27   14.65
  -5  -4  23   -3.38   11.27
  -5  -4  22  385.44   14.65
  -5  -4  21    2.25    3.38
   5   4 -20   85.65   12.40
  -5  -4  20   71.00    4.51
   5   4 -19   10.14   10.14
  -5  -4  19    4.51    4.51
   5   4 -18  401.22   22.54
  -5  -4  18  447.43   14.65
   5   4 -17  114.96   11.27
  -5  -4  17  105.94    6.76
   5   4 -16  108.19   13.52
  -5  -4  16  107.07    7.89
   5   4 -15    9.02   10.14
  -5  -4  15   11.27    4.51
   5   4 -14 1131.54   41.70
  -5  -4  14 1155.20   28.18
   5   4 -13    9.02    6.76
  -5  -4  13    2.25    2.25
   5   4 -12  380.94   16.91
  -5  -4  12  368.54   13.52
   5   4 -11   61.99    6.76
  -5  -4  11   61.99    3.38
   5   4 -10 1337.78   47.34
  -5  -4  10 1292.70   29.30
   5   4  -9    4.51    4.51
  -5  -4   9    7.89    2.25
   5   4  -8  415.87   16.91
  -5  -4   8  419.25   12.40
   5   4  -7    0.00    3.38
  -5  -4   7    6.76    2.25
   5   4  -6 1787.47   45.08
  -5  -4   6 1867.49   63.11
  -5  -4   5    2.25    3.38
  -5  -4   4  438.41   16.91
   5   4  -3    6.76    3.38
  -5  -4   3    7.89    2.25
  -5  -4   2  649.17   23.67
  -5  -4   1  219.77    9.02
  -5  -4   0  960.23   34.94
  -5  -4  -7   54.10    3.38
  -5  -4  -8 1056.03   25.92
  -5  -4  -9   30.43    3.38
  -5  -4 -10  222.02    6.76
   5   4  11  -22.54   10.14
  -5  -4 -11    3.38    2.25
   5   4  12  589.44   30.43
  -5  -4 -12  591.69   14.65
   5   4  13   -7.89   12.40
  -5  -4 -13   21.41    3.38
   5   4  14  356.14   23.67
  -5  -4 -14  351.63   10.14
   5   4  15    7.89   10.14
  -5  -4 -15    1.13    4.51
   5   4  16  321.20   27.05
  -5  -4 -16  331.35   13.52
   5   4  17   15.78    9.02
  -5  -4 -17    4.51    5.64
   5   4  18  191.59   22.54
  -5  -4 -18  155.53    6.76
   5   4  19   -4.51   11.27
  -5  -4 -19    2.25   11.27
   5   4  20  339.24   28.18
  -5  -4 -20  285.14   29.30
   5   4  21    7.89   18.03
  -5  -4 -21   30.43   15.78
   5   4  22   47.34   15.78
  -5  -4 -22   32.68   16.91
   5   4  23    0.00   13.52
  -5  -4 -23  -19.16   20.29
  -5  -5  26   13.52   12.40
  -5  -5  25   27.05   12.40
  -5  -5  24  385.44   23.67
  -5  -5  23   46.21   12.40
  -5  -5  22    5.64    5.64
  -5  -5  21   -6.76    6.76
  -5  -5  20  278.38   10.14
  -5  -5  19    2.25    5.64
  -5  -5  18   65.37    6.76
  -5  -5  17    4.51    3.38
  -5  -5  16  437.29    9.02
  -5  -5  15  139.75    3.38
  -5  -5  14  157.78    4.51
   5   5 -13   56.35    7.89
  -5  -5  13   55.22    2.25
  -5  -5  12  998.55   21.41
  -5  -5  11  261.47    7.89
  -5  -5  10  391.08    7.89
  -5  -5   9    0.00    2.25
  -5  -5   8 1035.74   27.05
  -5  -5   7   18.03    2.25
   5   5  -6  276.12   12.40
  -5  -5   6  289.65   12.40
   5   5  -5   73.26    4.51
  -5  -5   5   73.26    5.64
  -5  -5   4  592.82   22.54
  -5  -5   3  214.14   10.14
  -5  -5   2 1494.44   40.57
  -5  -5  -8  224.28   10.14
  -5  -5  -9  179.20    6.76
  -5  -5 -10  556.75   13.52
   5   5  11   -1.13    7.89
  -5  -5 -11   -1.13    3.38
   5   5  12  125.10   16.91
  -5  -5 -12  145.39    5.64
   5   5  13  114.96   15.78
  -5  -5 -13  126.23    5.64
   5   5  14  303.17   22.54
  -5  -5 -14  331.35   10.14
   5   5  15  -13.52   15.78
  -5  -5 -15    1.13    3.38
   5   5  16  213.01   14.65
  -5  -5 -16  205.12   10.14
   5   5  17   45.08   10.14
  -5  -5 -17   43.95    5.64
   5   5  18  351.63   29.30
  -5  -5 -18  387.70   14.65
   5   5  19  -12.40   11.27
  -5  -5 -19    3.38    6.76
   5   5  20  173.56   24.79
  -5  -5 -20  113.83    6.76
   5   5  21   61.99   15.78
  -5  -5 -21   37.19   24.79
   5   5  22  379.81   32.68
  -5  -5 -22  351.63   33.81
   5   5  23   21.41   21.41
  -5  -5 -23    6.76   14.65
  -5  -6  26  126.23   15.78
  -5  -6  25  107.07   14.65
  -5  -6  24  -11.27   16.91
  -5  -6  23  122.85   19.16
  -5  -6  22  153.28   12.40
  -5  -6  21  184.83    9.02
  -5  -6  20   14.65    5.64
  -5  -6  19    7.89    1.13
  -5  -6  18  151.02    4.51
  -5  -6  17  208.50    5.64
  -5  -6  16   34.94    2.25
  -5  -6  15   69.88    3.38
  -5  -6  14  312.19   10.14
  -5  -6  13  409.11   11.27
  -5  -6  12   84.53    3.38
  -5  -6  11   12.40    2.25
  -5  -6  10  435.03   10.14
  -5  -6   9  686.36   14.65
  -5  -6   8  162.29    5.64
  -5  -6   7   51.84    3.38
   5   6  -6  654.80   19.16
  -5  -6   6  694.25   27.05
  -5  -6   5  190.47    9.02
  -5  -6   4  173.56    9.02
  -5  -6   3    2.25    3.38
   5   6  -1 1448.23   64.24
  -5  -6   1 1470.77   56.35
   5   6   0  457.57   23.67
   5   6   6  158.91   15.78
   5   6   7 1028.98   68.75
   5   6   8  252.45   19.16
  -5  -6  -9   11.27    4.51
   5   6  10   43.95   10.14
  -5  -6 -10   58.61    6.76
   5   6  11  526.32   28.18
  -5  -6 -11  559.01   14.65
   5   6  12  331.35   23.67
  -5  -6 -12  364.03   10.14
   5   6  13   85.65   16.91
  -5  -6 -13   80.02    4.51
   5   6  14  117.21   16.91
  -5  -6 -14  121.72    5.64
   5   6  15  380.94   22.54
  -5  -6 -15  379.81   11.27
   5   6  16  387.70   20.29
  -5  -6 -16  391.08   11.27
   5   6  17    1.13   11.27
  -5  -6 -17    2.25    5.64
   5   6  18   85.65   16.91
  -5  -6 -18   95.80    6.76
   5   6  19  231.04   25.92
  -5  -6 -19  238.93   12.40
   5   6  20  122.85   19.16
  -5  -6 -20  121.72    9.02
   5   6  21   18.03   14.65
   5   6  22   63.11   20.29
  -5  -6 -22   10.14   22.54
  -5  -7  25  140.88   19.16
  -5  -7  24   43.95   16.91
  -5  -7  23  346.00   21.41
  -5  -7  22   -2.25    6.76
  -5  -7  21   95.80    9.02
  -5  -7  20   47.34    2.25
  -5  -7  19  313.31    6.76
  -5  -7  18   21.41    2.25
  -5  -7  17  104.81    4.51
  -5  -7  16   34.94    3.38
  -5  -7  15  868.94   20.29
  -5  -7  14   45.08    4.51
  -5  -7  13   90.16    5.64
  -5  -7  12   28.18    3.38
  -5  -7  11  664.95   13.52
  -5  -7  10   11.27    2.25
  -5  -7   9   27.05    2.25
  -5  -7   8   24.79    3.38
  -5  -7   7  460.95   14.65
   5   7  -6   86.78    7.89
  -5  -7   6   82.27    5.64
   5   7  -5  156.66    7.89
  -5  -7   5  174.69   10.14
   5   7  -4  123.97   13.52
  -5  -7   4  145.39   10.14
   5   7  -3  617.61   28.18
   5   7  -2   48.46    6.76
  -5  -7   2   52.97    7.89
   5   7  -1  250.20   14.65
  -5  -7   1  251.33   14.65
   5   7   0  267.11   14.65
  -5  -7   0  249.07   14.65
   5   7   1 1160.84   49.59
   5   7   7    0.00    5.64
   5   7   9   96.92   74.38
   5   7  10  165.67   14.65
  -5  -7 -10  152.15    7.89
   5   7  11   72.13   13.52
  -5  -7 -11   80.02    5.64
   5   7  12   45.08   15.78
  -5  -7 -12   68.75    4.51
   5   7  13  331.35   27.05
  -5  -7 -13  370.79   10.14
   5   7  14  163.42   12.40
  -5  -7 -14  184.83    6.76
   5   7  15   14.65   10.14
  -5  -7 -15   29.30    4.51
   5   7  16    4.51   11.27
  -5  -7 -16   10.14    3.38
   5   7  17  440.67   31.56
  -5  -7 -17  373.05   11.27
   5   7  18   66.49   14.65
  -5  -7 -18   50.72    5.64
   5   7  19  114.96   21.41
   5   7  20   21.41   13.52
  -5  -7 -20   22.54   19.16
   5   7  21  419.25   34.94
  -5  -7 -21  137.50   71.00
   5   7  22   20.29   14.65
  -5  -7 -22   42.83   16.91
  -5  -8  25  285.14   23.67
  -5  -8  24   -7.89   16.91
  -5  -8  23  126.23   14.65
  -5  -8  22    6.76    7.89
  -5  -8  21  349.38   12.40
  -5  -8  20   11.27    3.38
  -5  -8  19  137.50    4.51
  -5  -8  18    0.00    2.25
  -5  -8  17  756.24   16.91
  -5  -8  16    6.76    3.38
  -5  -8  15   89.04    4.51
  -5  -8  14    9.02    3.38
  -5  -8  13  808.08   20.29
  -5  -8  12    0.00    2.25
  -5  -8  11   41.70    2.25
  -5  -8  10   69.88    3.38
  -5  -8   9 1363.70   27.05
  -5  -8   8   23.67    4.51
  -5  -8   7   84.53    4.51
   5   8  -6   29.30    5.64
  -5  -8   6   34.94    4.51
   5   8  -5  506.04   23.67
  -5  -8   5  471.10   25.92
   5   8  -4  229.91   14.65
  -5  -8   4  192.72   10.14
   5   8  -3   14.65    4.51
  -5  -8   3    5.64    3.38
   5   8  -2   42.83    9.02
  -5  -8   2   52.97    7.89
   5   8  -1 1732.24   66.49
  -5  -8   1 1780.71   68.75
   5   8   0   -3.38    6.76
   5   8   1   52.97    7.89
  -5  -8  -5   42.83    9.02
   5   8   6   10.14    6.76
   5   8   7 1352.43   65.37
   5   8   8   13.52   10.14
   5   8   9 -113.83   56.35
  -5  -8  -9   23.67   10.14
   5   8  10   16.91    9.02
  -5  -8 -10   10.14    5.64
   5   8  11  945.58   46.21
  -5  -8 -11  924.16   28.18
  -5  -8 -12    6.76    5.64
   5   8  13   20.29   15.78
  -5  -8 -13    4.51    3.38
   5   8  14  -23.67   16.91
  -5  -8 -14    3.38    3.38
   5   8  15  703.27   27.05
  -5  -8 -15  715.66   19.16
   5   8  16    2.25   14.65
  -5  -8 -16   24.79    6.76
   5   8  17   74.38   18.03
  -5  -8 -17   47.34    5.64
   5   8  18    3.38   11.27
  -5  -8 -18   -1.13    5.64
   5   8  19  441.80   33.81
  -5  -8 -19  398.97   16.91
   5   8  20   -1.13   18.03
  -5  -8 -20  -12.40   19.16
   5   8  21   39.45   20.29
  -5  -8 -21   45.08   21.41
   5   8  22   46.21   21.41
  -5  -8 -22   -5.64   15.78
  -5  -9  25   59.73   18.03
  -5  -9  24   78.89   13.52
  -5  -9  23  288.52   21.41
  -5  -9  22    2.25    7.89
  -5  -9  21   96.92   11.27
  -5  -9  20   49.59    4.51
  -5  -9  19  370.79    9.02
  -5  -9  18   10.14    3.38
  -5  -9  17   28.18    3.38
  -5  -9  16  181.45    5.64
  -5  -9  15  664.95   13.52
  -5  -9  14   60.86    4.51
  -5  -9  13   46.21    4.51
  -5  -9  12  260.34    6.76
  -5  -9  11  610.85   12.40
  -5  -9  10    5.64    2.25
  -5  -9   9   61.99    4.51
  -5  -9   8  138.62    6.76
   5   9  -7 1170.98   54.10
  -5  -9   7 1202.54   25.92
  -5  -9   6   34.94    3.38
   5   9  -5  273.87   57.48
  -5  -9   5  199.48    7.89
   5   9  -4  346.00   16.91
  -5  -9   4  380.94   15.78
   5   9  -3 1024.47   43.95
  -5  -9   3  963.61   33.81
   5   9  -2  298.66   15.78
  -5  -9   2  307.68   18.03
   5   9  -1   10.14    5.64
   5   9   0    0.00    4.51
   5   9   1 1296.08   51.84
  -5  -9  -4  252.45   18.03
   5   9   5 1281.43   58.61
  -5  -9  -5 1323.13   61.99
   5   9   6   31.56    9.02
   5   9   7   81.15   12.40
   5   9   8   45.08   12.40
   5   9   9  814.84   39.45
  -5  -9  -9  812.59   42.83
   5   9  10   50.72   11.27
  -5  -9 -10   52.97   11.27
   5   9  11   52.97   12.40
  -5  -9 -11   46.21    6.76
  -5  -9 -12   13.52    4.51
   5   9  13  747.22   38.32
  -5  -9 -13  670.58   23.67
   5   9  14   33.81   16.91
  -5  -9 -14    5.64    4.51
   5   9  15   84.53   11.27
  -5  -9 -15   76.64    6.76
   5   9  16   13.52   11.27
  -5  -9 -16    0.00    4.51
   5   9  17  485.75   32.68
  -5  -9 -17  409.11   14.65
   5   9  18   65.37   19.16
  -5  -9 -18   48.46    5.64
   5   9  19   71.00   15.78
  -5  -9 -19   64.24    9.02
   5   9  20    1.13   18.03
  -5  -9 -20  -19.16   13.52
   5   9  21  200.61   22.54
  -5  -9 -21  289.65   31.56
   5   9  22   27.05   21.41
  -5  -9 -22   48.46   24.79
  -5 -10  24    1.13   12.40
  -5 -10  23   46.21   14.65
  -5 -10  22  330.22   18.03
  -5 -10  21  203.99   14.65
  -5 -10  20   23.67    4.51
  -5 -10  19   57.48    4.51
  -5 -10  18  376.43   10.14
  -5 -10  17  509.42   11.27
  -5 -10  16   52.97    4.51
  -5 -10  15   40.57    3.38
  -5 -10  14  592.82   12.40
  -5 -10  13  379.81    9.02
  -5 -10  12  174.69    7.89
  -5 -10  11   61.99    4.51
  -5 -10  10  432.78   10.14
  -5 -10   9  719.04   18.03
  -5 -10   8  130.74    6.76
   5  10  -7   -2.25    4.51
  -5 -10   7    1.13    2.25
  -5 -10   6  740.46   20.29
  -5 -10   5  932.05   25.92
   5  10  -4  193.85   15.78
  -5 -10   4  200.61   10.14
   5  10  -3    6.76    4.51
  -5 -10   3    7.89    7.89
   5  10  -2  153.28   11.27
  -5 -10   2  207.37   13.52
   5  10  -1  985.02   41.70
   5  10   0  681.85   29.30
   5  10   1    5.64    6.76
   5  10   2  428.27   23.67
  -5 -10  -2  413.62   28.18
  -5 -10  -3  790.05   45.08
   5  10   4  261.47   18.03
  -5 -10  -4  238.93   19.16
   5  10   5  -21.41   13.52
  -5 -10  -5    2.25    6.76
   5  10   6  334.73   22.54
   5  10   7 1299.46   55.22
   5  10   8  269.36   22.54
  -5 -10  -8  233.29   19.16
   5  10   9   -1.13    7.89
  -5 -10  -9   -4.51    9.02
   5  10  10   -9.02   10.14
  -5 -10 -10   -2.25   13.52
   5  10  11  401.22   22.54
  -5 -10 -11  356.14   14.65
   5  10  12  101.43   14.65
  -5 -10 -12   78.89    7.89
   5  10  13   -9.02   11.27
  -5 -10 -13   -1.13    6.76
   5  10  14  148.77   13.52
  -5 -10 -14  138.62   10.14
   5  10  15  370.79   28.18
  -5 -10 -15  392.21   12.40
   5  10  16  190.47   21.41
  -5 -10 -16  180.32    7.89
   5  10  17   28.18   13.52
  -5 -10 -17   22.54    4.51
   5  10  18   45.08   19.16
  -5 -10 -18   51.84    5.64
   5  10  19  208.50   21.41
  -5 -10 -19  202.87   22.54
   5  10  20   66.49   15.78
  -5 -10 -20   86.78   19.16
   5  10  21   16.91   20.29
  -5 -10 -21   67.62   24.79
  -5 -11  24  313.31   22.54
  -5 -11  23   84.53   14.65
  -5 -11  22    0.00   10.14
  -5 -11  21   20.29   10.14
  -5 -11  20  406.86   16.91
  -5 -11  19   80.02    5.64
  -5 -11  18   78.89    5.64
  -5 -11  17   13.52    3.38
  -5 -11  16  405.73    9.02
  -5 -11  15  160.04    5.64
  -5 -11  14  201.74    5.64
  -5 -11  13  105.94    4.51
  -5 -11  12 1121.39   23.67
  -5 -11  11  189.34    7.89
  -5 -11  10  444.05   12.40
  -5 -11   9   10.14    3.38
  -5 -11   8  705.52   14.65
  -5 -11   7  339.24   10.14
  -5 -11   6  284.01   10.14
  -5 -11   5   25.92    4.51
  -5 -11   4  996.29   37.19
   5  11  -3  552.24   25.92
  -5 -11   3  490.26   29.30
   5  11  -2  608.60   28.18
  -5 -11   2  591.69   34.94
   5  11  -1    6.76    6.76
  -5 -11   1   -3.38    5.64
   5  11   0  794.56   36.06
   5  11   1  218.64   14.65
  -5 -11  -1  199.48   16.91
   5  11   2  748.35   34.94
  -5 -11  -2  766.38   36.06
   5  11   3   36.06   10.14
  -5 -11  -3   41.70   11.27
   5  11   4  527.45   27.05
  -5 -11  -4  489.13   30.43
   5  11   5  312.19   20.29
  -5 -11  -5  303.17   20.29
   5  11   6  643.53   23.67
   5  11   7   21.41    9.02
  -5 -11  -7   25.92   12.40
   5  11   8  222.02   19.16
  -5 -11  -8  193.85   18.03
   5  11   9   60.86   12.40
  -5 -11  -9   68.75   15.78
   5  11  10  758.49   37.19
  -5 -11 -10  687.49   38.32
   5  11  11   10.14    6.76
  -5 -11 -11   11.27   10.14
   5  11  12  198.36   14.65
  -5 -11 -12  188.21   10.14
   5  11  13  181.45   13.52
  -5 -11 -13  184.83   13.52
   5  11  14  307.68   23.67
  -5 -11 -14  316.70   13.52
   5  11  15   30.43   12.40
  -5 -11 -15   21.41    7.89
   5  11  16   78.89   16.91
  -5 -11 -16   73.26    9.02
   5  11  17   80.02   16.91
  -5 -11 -17   77.76    6.76
   5  11  18  217.52   22.54
  -5 -11 -18  196.10   10.14
   5  11  19   47.34   19.16
  -5 -11 -19   -1.13   13.52
   5  11  20   48.46   15.78
  -5 -11 -20   77.76   18.03
   5  11  21   32.68   21.41
  -5 -11 -21   10.14   23.67
  -5 -12  24   32.68   23.67
  -5 -12  23    4.51   12.40
  -5 -12  22  375.30   19.16
  -5 -12  21  -14.65   12.40
  -5 -12  20   72.13   10.14
  -5 -12  19   10.14    5.64
  -5 -12  18  549.99   13.52
  -5 -12  17   18.03    4.51
  -5 -12  16  171.31    6.76
  -5 -12  15   15.78    3.38
  -5 -12  14  867.81   16.91
  -5 -12  13   18.03    3.38
  -5 -12  12  376.43   10.14
  -5 -12  11   -5.64    3.38
  -5 -12  10  728.06   15.78
  -5 -12   9   67.62    4.51
  -5 -12   8  392.21   11.27
  -5 -12   7   -2.25    3.38
  -5 -12   6  837.38   22.54
  -5 -12   5  100.31    5.64
  -5 -12   4  475.61   15.78
  -5 -12   3  125.10    9.02
   5  12  -2  886.97   28.18
  -5 -12   2  735.95   40.57
   5  12  -1  110.45   11.27
  -5 -12   1  129.61   13.52
   5  12   0  779.90   34.94
  -5 -12   0  799.06   38.32
   5  12   1   22.54    5.64
  -5 -12  -1  -32.68   18.03
   5  12   2  601.83   21.41
  -5 -12  -2  572.53   33.81
   5  12   3   16.91   11.27
  -5 -12  -3    7.89    5.64
   5  12   4  632.26   24.79
  -5 -12  -4  617.61   22.54
   5  12   5    0.00    6.76
  -5 -12  -5   -4.51    6.76
   5  12   6  756.24   24.79
  -5 -12  -6  739.33   27.05
   5  12   7   -4.51    6.76
  -5 -12  -7   -2.25    9.02
   5  12   8  886.97   31.56
  -5 -12  -8  900.50   32.68
   5  12   9   -1.13    5.64
   5  12  10  290.77   16.91
  -5 -12 -10  268.23   22.54
   5  12  11  -15.78    7.89
  -5 -12 -11  -22.54   15.78
   5  12  12  657.06   38.32
  -5 -12 -12  582.67   23.67
  -5 -12 -13   15.78    6.76
   5  12  14  259.22   24.79
  -5 -12 -14  232.17   12.40
   5  12  15   73.26   18.03
  -5 -12 -15   23.67    9.02
   5  12  16  574.78   37.19
  -5 -12 -16  510.54   21.41
   5  12  17   43.95   18.03
  -5 -12 -17   19.16    6.76
   5  12  18  105.94   19.16
  -5 -12 -18   86.78   10.14
   5  12  19   -7.89   12.40
  -5 -12 -19  -54.10   34.94
   5  12  20  293.03   31.56
  -5 -12 -20  233.29   23.67
  -5 -13  23   27.05   11.27
  -5 -13  22   28.18   10.14
  -5 -13  21   -7.89   13.52
  -5 -13  20  375.30   23.67
  -5 -13  19    1.13    5.64
  -5 -13  18   40.57    6.76
  -5 -13  17    1.13    4.51
  -5 -13  16  554.50   13.52
  -5 -13  15   28.18    4.51
  -5 -13  14  121.72    5.64
  -5 -13  13   55.22    4.51
  -5 -13  12  564.64   12.40
  -5 -13  11  123.97    5.64
  -5 -13  10  107.07    5.64
  -5 -13   9   -1.13    4.51
  -5 -13   8  930.93   22.54
  -5 -13   7   61.99    4.51
  -5 -13   6  451.94   12.40
  -5 -13   5  119.47    6.76
  -5 -13   4  557.88   15.78
  -5 -13   3  220.90    9.02
   5  13  -2 1045.88   32.68
  -5 -13   2 1022.22   31.56
   5  13  -1   -6.76    6.76
  -5 -13   1    1.13    6.76
   5  13   0  804.70   25.92
  -5 -13   0  753.98   39.45
   5  13   1   30.43    7.89
  -5 -13  -1   32.68    9.02
   5  13   2  635.64   24.79
  -5 -13  -2  649.17   22.54
   5  13   3    7.89    5.64
  -5 -13  -3    5.64    7.89
   5  13   4  329.09   16.91
  -5 -13  -4  327.97   16.91
   5  13   5   95.80   11.27
  -5 -13  -5  117.21   10.14
   5  13   6 1280.30   39.45
  -5 -13  -6 1185.63   38.32
   5  13   7   29.30    7.89
  -5 -13  -7   21.41    9.02
   5  13   8  311.06   15.78
  -5 -13  -8  265.98   22.54
   5  13   9   80.02   11.27
  -5 -13  -9   32.68   16.91
   5  13  10  590.56   24.79
  -5 -13 -10  598.45   33.81
   5  13  11  -19.16    7.89
  -5 -13 -11   13.52   18.03
  -5 -13 -12  207.37   25.92
   5  13  13   18.03   14.65
  -5 -13 -13   23.67    7.89
   5  13  14  469.97   32.68
  -5 -13 -14  490.26   20.29
   5  13  15    5.64   12.40
  -5 -13 -15   -3.38    7.89
  -5 -13 -16  146.51   11.27
   5  13  17   71.00   20.29
  -5 -13 -17   16.91   10.14
   5  13  18  297.54   52.97
  -5 -13 -18  373.05   34.94
   5  13  19    3.38   14.65
  -5 -13 -19   19.16   14.65
   5  13  20   33.81   15.78
  -5 -13 -20   40.57   19.16
  -5 -14  22  119.47   19.16
  -5 -14  21   60.86   16.91
  -5 -14  20   48.46   12.40
  -5 -14  19   25.92    5.64
  -5 -14  18  389.95   13.52
  -5 -14  17  164.55    7.89
  -5 -14  16  148.77    7.89
  -5 -14  15   36.06    5.64
  -5 -14  14  380.94   10.14
  -5 -14  13  249.07    7.89
  -5 -14  12   65.37    5.64
  -5 -14  11   20.29    3.38
  -5 -14  10  460.95   11.27
  -5 -14   9  280.63   10.14
  -5 -14   8  359.52   12.40
  -5 -14   7   15.78    4.51
  -5 -14   6  296.41   10.14
  -5 -14   5  369.67   12.40
  -5 -14   4  579.29   21.41
   5  14  -3   14.65    7.89
  -5 -14   3   13.52    4.51
   5  14  -2  318.95   22.54
  -5 -14   2  282.88   11.27
   5  14  -1  265.98   13.52
  -5 -14   1  267.11   13.52
   5  14   0  376.43   16.91
  -5 -14   0  355.01   23.67
   5  14   1   46.21    7.89
  -5 -14  -1   40.57    7.89
   5  14   2  369.67   16.91
  -5 -14  -2  362.90   16.91
   5  14   3   66.49   11.27
  -5 -14  -3   49.59   13.52
   5  14   4  389.95   18.03
  -5 -14  -4  373.05   16.91
   5  14   5   13.52    6.76
  -5 -14  -5   11.27    7.89
   5  14   6  140.88   12.40
  -5 -14  -6  138.62   12.40
   5  14   7  323.46   16.91
  -5 -14  -7  364.03   25.92
   5  14   8  171.31   14.65
  -5 -14  -8  169.05   18.03
   5  14   9    6.76    9.02
  -5 -14  -9   -1.13   15.78
   5  14  10  258.09   15.78
  -5 -14 -10  249.07   20.29
   5  14  11  104.81   38.32
  -5 -14 -11  109.32   18.03
   5  14  12  383.19   30.43
  -5 -14 -12  429.40   32.68
   5  14  13   -1.13   11.27
  -5 -14 -13    3.38    9.02
   5  14  14   78.89   16.91
  -5 -14 -14   64.24   13.52
   5  14  15  270.49   23.67
  -5 -14 -15  262.60   14.65
   5  14  16  382.06   28.18
  -5 -14 -16  417.00   21.41
   5  14  17    0.00   13.52
  -5 -14 -17   29.30   21.41
   5  14  18  -41.70   39.45
  -5 -14 -18   74.38   19.16
   5  14  19  114.96   25.92
  -5 -14 -19  103.69   21.41
  -5 -15  21   69.88   19.16
  -5 -15  20   59.73   16.91
  -5 -15  19  166.80   13.52
  -5 -15  18   21.41    9.02
  -5 -15  17   73.26    7.89
  -5 -15  16  140.88    7.89
  -5 -15  15  280.63   10.14
  -5 -15  14    2.25    6.76
  -5 -15  13  116.08    6.76
  -5 -15  12  149.89    6.76
  -5 -15  11  373.05   10.14
  -5 -15  10  108.19    5.64
  -5 -15   9  167.93    7.89
  -5 -15   8  176.94    7.89
  -5 -15   7  480.11   13.52
  -5 -15   6  233.29    9.02
  -5 -15   5    1.13    5.64
  -5 -15   4  145.39    9.02
   5  15  -3  757.36   41.70
  -5 -15   3  746.09   21.41
   5  15  -2   82.27   12.40
  -5 -15   2   96.92    9.02
  -5 -15   1    3.38    6.76
   5  15   0  250.20   13.52
  -5 -15   0  215.26   12.40
   5  15   1  598.45   22.54
  -5 -15  -1  582.67   22.54
   5  15   2  244.57   15.78
  -5 -15  -2  254.71   14.65
   5  15   3   50.72   10.14
  -5 -15  -3   59.73    9.02
   5  15   4   46.21   10.14
  -5 -15  -4   39.45    9.02
   5  15   5  722.43   27.05
  -5 -15  -5  682.98   25.92
   5  15   6  149.89   12.40
  -5 -15  -6  135.24   13.52
   5  15   7   51.84   14.65
  -5 -15  -7   52.97   10.14
   5  15   8   69.88   11.27
  -5 -15  -8   96.92   12.40
   5  15   9  431.65   20.29
  -5 -15  -9  417.00   25.92
   5  15  10  154.40   21.41
  -5 -15 -10  136.37   21.41
   5  15  11   -3.38   10.14
   5  15  12   84.53   14.65
  -5 -15 -12   19.16   13.52
   5  15  13  584.93   36.06
  -5 -15 -13  486.88   21.41
   5  15  14  208.50   24.79
  -5 -15 -14  182.58   12.40
   5  15  15   48.46   19.16
  -5 -15 -15    5.64   10.14
   5  15  16   47.34   21.41
  -5 -15 -16   20.29   21.41
   5  15  17  330.22   32.68
  -5 -15 -17  267.11   28.18
   5  15  18   85.65   22.54
  -5 -15 -18   46.21   16.91
   5  15  19    6.76   15.78
  -5 -15 -19   16.91   22.54
  -5 -16  21  262.60   25.92
  -5 -16  20   31.56   16.91
  -5 -16  19   68.75   18.03
  -5 -16  18   10.14    7.89
  -5 -16  17  321.20   13.52
  -5 -16  16    0.00    6.76
  -5 -16  15   77.76    6.76
  -5 -16  14    7.89    6.76
  -5 -16  13  387.70   11.27
  -5 -16  12   -3.38    5.64
  -5 -16  11   31.56    5.64
  -5 -16  10    2.25    4.51
  -5 -16   9  494.77   13.52
  -5 -16   8   21.41    5.64
  -5 -16   7   11.27    5.64
  -5 -16   6   95.80    6.76
  -5 -16   5  534.21   14.65
   5  16  -4   11.27    9.02
  -5 -16   4   15.78    6.76
   5  16  -3   24.79   12.40
  -5 -16   3   -5.64    6.76
   5  16  -2   27.05   11.27
  -5 -16   2   33.81    6.76
  -5 -16   1  513.93   16.91
   5  16   0  -14.65    7.89
  -5 -16   0   23.67    9.02
   5  16   1   14.65    6.76
  -5 -16  -1   24.79    6.76
   5  16   2   75.51    9.02
  -5 -16  -2   83.40   10.14
   5  16   3  473.35   19.16
  -5 -16  -3  458.70   21.41
   5  16   4   38.32    7.89
  -5 -16  -4   12.40    7.89
   5  16   5    0.00    7.89
  -5 -16  -5   16.91   10.14
   5  16   6    3.38   14.65
  -5 -16  -6    2.25    7.89
   5  16   7  588.31   25.92
  -5 -16  -7  580.42   23.67
   5  16   8   -4.51    9.02
  -5 -16  -8   31.56   13.52
   5  16   9    7.89   14.65
  -5 -16  -9   -9.02   14.65
   5  16  10   -4.51   10.14
  -5 -16 -10   12.40   12.40
   5  16  11  490.26   28.18
  -5 -16 -11  469.97   31.56
   5  16  12   -2.25   14.65
  -5 -16 -12    7.89   13.52
   5  16  13   19.16   19.16
  -5 -16 -13   32.68   20.29
   5  16  14   34.94   14.65
  -5 -16 -14    0.00   20.29
   5  16  15  542.10   33.81
  -5 -16 -15  509.42   36.06
   5  16  16    6.76   13.52
  -5 -16 -16   -4.51   15.78
   5  16  17   28.18   14.65
  -5 -16 -17   19.16   16.91
   5  16  18   10.14   15.78
  -5 -16 -18   13.52   22.54
  -5 -17  21   34.94   13.52
  -5 -17  20   21.41   12.40
  -5 -17  19  243.44   21.41
  -5 -17  18    6.76   11.27
  -5 -17  17   49.59    9.02
  -5 -17  16   72.13   10.14
  -5 -17  15  350.51   11.27
  -5 -17  14    9.02    6.76
  -5 -17  13   48.46    6.76
  -5 -17  12   81.15    6.76
  -5 -17  11  326.84   11.27
  -5 -17  10    4.51    5.64
  -5 -17   9    9.02    5.64
  -5 -17   8   29.30    5.64
  -5 -17   7  442.92   13.52
  -5 -17   6   40.57    6.76
  -5 -17   5   19.16    5.64
   5  17  -4   10.14   10.14
  -5 -17   4    3.38    5.64
   5  17  -3  666.07   37.19
  -5 -17   3  571.40   18.03
   5  17  -2   54.10   13.52
  -5 -17   2   42.83    6.76
   5  17  -1    1.13    9.02
  -5 -17   1   16.91    6.76
   5  17   0  -20.29   13.52
  -5 -17   0    1.13    6.76
  -5 -17  -1 1045.88   29.30
   5  17   2   34.94    9.02
  -5 -17  -2   42.83   10.14
   5  17   3   29.30   11.27
  -5 -17  -3   34.94    9.02
   5  17   4   -6.76   14.65
  -5 -17  -4    7.89   15.78
   5  17   5  600.71   32.68
  -5 -17  -5  551.12   32.68
   5  17   6   50.72   13.52
  -5 -17  -6   74.38   12.40
   5  17   7   46.21   13.52
  -5 -17  -7   34.94    9.02
   5  17   8    0.00   14.65
  -5 -17  -8    4.51   12.40
   5  17   9  613.10   36.06
  -5 -17  -9 -113.83   91.29
   5  17  10    1.13   12.40
  -5 -17 -10   30.43   19.16
   5  17  11    5.64   18.03
  -5 -17 -11  -12.40   19.16
   5  17  12    2.25   12.40
  -5 -17 -12   19.16   18.03
   5  17  13  539.85   32.68
  -5 -17 -13  527.45   32.68
   5  17  14  -42.83   18.03
  -5 -17 -14    9.02   15.78
   5  17  15   -7.89   20.29
  -5 -17 -15   31.56   16.91
   5  17  16    1.13   19.16
  -5 -17 -16  -10.14   23.67
   5  17  17  291.90   30.43
  -5 -17 -17  223.15   32.68
  -5 -18  20   -5.64   16.91
  -5 -18  19    0.00   18.03
  -5 -18  18  132.99   22.54
  -5 -18  17  384.32   19.16
  -5 -18  16   23.67    7.89
  -5 -18  15   18.03    6.76
  -5 -18  14  167.93   11.27
  -5 -18  13  122.85    9.02
  -5 -18  12   31.56    6.76
  -5 -18  11   15.78    5.64
  -5 -18  10  139.75   10.14
  -5 -18   9  189.34   11.27
  -5 -18   8   86.78    7.89
  -5 -18   7    6.76    5.64
  -5 -18   6  170.18    7.89
  -5 -18   5  252.45   10.14
  -5 -18   4  311.06   11.27
   5  18  -3    1.13   13.52
  -5 -18   3    1.13    6.76
   5  18  -2  162.29   16.91
  -5 -18   2  140.88   10.14
   5  18  -1  320.08   22.54
  -5 -18   1  331.35   12.40
   5  18   0  207.37   19.16
  -5 -18   0  214.14   11.27
   5  18   1    2.25   10.14
  -5 -18  -1   10.14    6.76
   5  18   2   30.43   15.78
  -5 -18  -2   59.73    7.89
   5  18   3  611.98   34.94
  -5 -18  -3  595.07   20.29
   5  18   4   84.53   15.78
  -5 -18  -4  107.07   11.27
   5  18   5 -131.86   83.40
  -5 -18  -5   15.78   16.91
   5  18   6  196.10   85.65
  -5 -18  -6   77.76   18.03
   5  18   7  356.14   27.05
  -5 -18  -7  388.82   30.43
   5  18   8  118.34   18.03
  -5 -18  -8  101.43   21.41
   5  18   9   30.43   16.91
  -5 -18  -9   34.94   15.78
   5  18  10   19.16   13.52
  -5 -18 -10   42.83   14.65
   5  18  11  294.15   24.79
  -5 -18 -11  286.27   24.79
   5  18  12  104.81   22.54
  -5 -18 -12   98.05   18.03
   5  18  13   -1.13   19.16
  -5 -18 -13   -9.02   22.54
   5  18  14   33.81   15.78
  -5 -18 -14   27.05   24.79
   5  18  15   63.11   45.08
  -5 -18 -15  325.71   32.68
   5  18  16   96.92   18.03
  -5 -18 -16   81.15   20.29
  -5 -19  19   73.26   20.29
  -5 -19  18   55.22   20.29
  -5 -19  17   -3.38   10.14
  -5 -19  16  295.28   16.91
  -5 -19  15   38.32    9.02
  -5 -19  14   68.75    9.02
  -5 -19  13   -4.51    6.76
  -5 -19  12  314.44   14.65
  -5 -19  11   57.48    9.02
  -5 -19  10  162.29   10.14
  -5 -19   9    4.51    5.64
  -5 -19   8  255.84   12.40
  -5 -19   7  255.84   11.27
  -5 -19   6  255.84   11.27
  -5 -19   5    6.76    5.64
  -5 -19   4  433.91   15.78
  -5 -19   3  173.56   10.14
   5  19  -2  242.31   21.41
  -5 -19   2  228.79   12.40
   5  19  -1   12.40   11.27
  -5 -19   1    0.00    5.64
   5  19   0  384.32   27.05
  -5 -19   0  389.95   19.16
   5  19   1  241.18   21.41
  -5 -19  -1  243.44   14.65
   5  19   2  350.51   41.70
  -5 -19  -2  351.63   25.92
   5  19   3   13.52   21.41
  -5 -19  -3   28.18   13.52
  -5 -19  -4  158.91   18.03
  -5 -19  -5  139.75   18.03
   5  19   6  188.21   23.67
  -5 -19  -6  189.34   20.29
   5  19   7   15.78   13.52
  -5 -19  -7    7.89   11.27
   5  19   8   85.65   21.41
   5  19   9  222.02   22.54
  -5 -19  -9  218.64   25.92
   5  19  10  272.74   27.05
  -5 -19 -10  270.49   29.30
   5  19  11    6.76   14.65
  -5 -19 -11  -45.08   21.41
   5  19  12  155.53   20.29
  -5 -19 -12  137.50   21.41
   5  19  13  112.70   19.16
  -5 -19 -13  114.96   22.54
   5  19  14  291.90   29.30
  -5 -19 -14  254.71   27.05
   5  19  15   -2.25   21.41
  -5 -19 -15    3.38   25.92
  -5 -20  18  457.57   38.32
  -5 -20  17   -5.64   19.16
  -5 -20  16   80.02   11.27
  -5 -20  15  -25.92   11.27
  -5 -20  14  298.66   20.29
  -5 -20  13   12.40    7.89
  -5 -20  12   82.27    9.02
  -5 -20  11   -4.51    9.02
  -5 -20  10  245.69   12.40
  -5 -20   9    0.00   10.14
  -5 -20   8  181.45   11.27
  -5 -20   7   30.43   10.14
  -5 -20   6  315.57   14.65
  -5 -20   5    1.13    6.76
  -5 -20   4  305.42   13.52
  -5 -20   3    3.38    7.89
   5  20  -2  365.16   27.05
  -5 -20   2  373.05   25.92
   5  20  -1    5.64   11.27
  -5 -20   1    2.25   11.27
   5  20   0  430.53   29.30
  -5 -20   0  400.10   27.05
   5  20   1   30.43   12.40
  -5 -20  -1    3.38   12.40
   5  20   2  486.88   33.81
  -5 -20  -2  466.59   28.18
   5  20   3  -25.92   54.10
  -5 -20  -3   20.29   12.40
   5  20   4  547.74  105.94
  -5 -20  -4  389.95   28.18
  -5 -20  -5   24.79   13.52
   5  20   6  178.07   20.29
  -5 -20  -6  185.96   21.41
  -5 -20  -7    7.89   12.40
   5  20   8  307.68   25.92
  -5 -20  -8  323.46   25.92
   5  20   9    6.76   19.16
  -5 -20  -9   12.40   15.78
   5  20  10  188.21   20.29
  -5 -20 -10  174.69   27.05
   5  20  11   -7.89   20.29
  -5 -20 -11    7.89   23.67
   5  20  12  232.17   27.05
  -5 -20 -12  265.98   32.68
   5  20  13   -4.51   14.65
  -5 -20 -13   20.29   25.92
   5  20  14  138.62   21.41
  -5 -20 -14  127.35   22.54
  -5 -21  17   32.68   20.29
  -5 -21  16  311.06   18.03
  -5 -21  15   38.32   13.52
  -5 -21  14   27.05   11.27
  -5 -21  13    0.00   10.14
  -5 -21  12  302.04   18.03
  -5 -21  11   30.43   10.14
  -5 -21  10  140.88   15.78
  -5 -21   9   21.41    9.02
  -5 -21   8  296.41   18.03
  -5 -21   7   43.95   11.27
  -5 -21   6  176.94   14.65
  -5 -21   5   25.92   10.14
  -5 -21   4  402.35   20.29
  -5 -21   3   43.95   10.14
  -5 -21   2  391.08   20.29
   5  21  -1   52.97   15.78
  -5 -21   1   36.06   12.40
   5  21   0  402.35   29.30
  -5 -21   0  365.16   28.18
   5  21   1    6.76   11.27
  -5 -21  -1   15.78   14.65
   5  21   2  170.18   23.67
  -5 -21  -2  234.42   22.54
   5  21   3   36.06   18.03
  -5 -21  -3   20.29   15.78
   5  21   4  299.79   27.05
  -5 -21  -4  231.04   22.54
   5  21   5    7.89   13.52
  -5 -21  -5   30.43   14.65
   5  21   6  415.87   28.18
  -5 -21  -6  394.46   29.30
  -5 -21  -7   16.91   15.78
   5  21   8  156.66   20.29
  -5 -21  -8   98.05   19.16
   5  21   9   -4.51   14.65
  -5 -21  -9   -6.76   15.78
   5  21  10  352.76   28.18
  -5 -21 -10  347.12   29.30
   5  21  11   13.52   16.91
   5  21  12  119.47   25.92
  -5 -21 -12   64.24   20.29
   5  21  13   23.67   22.54
  -5 -21 -13   47.34   27.05
  -5 -22  16   19.16   18.03
  -5 -22  15   -2.25   13.52
  -5 -22  14  243.44   16.91
  -5 -22  13  100.31   19.16
  -5 -22  12   61.99   11.27
  -5 -22  11   -6.76   13.52
  -5 -22  10  180.32   13.52
  -5 -22   9  191.59   16.91
  -5 -22   8  103.69   12.40
  -5 -22   7   12.40   11.27
  -5 -22   6  194.98   14.65
  -5 -22   5  201.74   18.03
  -5 -22   4   90.16   13.52
  -5 -22   3   -5.64    9.02
  -5 -22   2  235.55   14.65
  -5 -22   1  169.05   15.78
   5  22   0  249.07   22.54
  -5 -22   0  254.71   18.03
   5  22   1   32.68   14.65
  -5 -22  -1  -52.97   18.03
   5  22   2  147.64   20.29
  -5 -22  -2  170.18   19.16
   5  22   3  234.42   27.05
  -5 -22  -3  214.14   23.67
   5  22   4  249.07   22.54
  -5 -22  -4  246.82   23.67
   5  22   5   18.03   14.65
  -5 -22  -5  -55.22   36.06
   5  22   6   92.42   23.67
  -5 -22  -6  102.56   20.29
   5  22   7  166.80   22.54
  -5 -22  -7  183.71   22.54
   5  22   8  262.60   29.30
  -5 -22  -8  252.45   24.79
   5  22   9   15.78   15.78
  -5 -22  -9  -18.03   16.91
   5  22  10   75.51   23.67
  -5 -22 -10   58.61   20.29
   5  22  11   65.37   20.29
  -5 -22 -11   66.49   20.29
   5  22  12  218.64   23.67
  -5 -22 -12  201.74   25.92
  -5 -23  14   12.40   10.14
  -5 -23  13   13.52   12.40
  -5 -23  12  154.40   16.91
  -5 -23  11  202.87   14.65
  -5 -23  10   48.46   14.65
  -5 -23   9  -13.52   11.27
  -5 -23   8   69.88   12.40
  -5 -23   7  279.50   24.79
  -5 -23   6   24.79   19.16
  -5 -23   5    2.25   10.14
  -5 -23   4   40.57   13.52
  -5 -23   3  322.33   18.03
  -5 -23   2   81.15   12.40
  -5 -23   1    1.13   10.14
  -5 -23   0   99.18   15.78
   5  23   1  380.94   29.30
  -5 -23  -1  385.44   20.29
   5  23   2   90.16   23.67
  -5 -23  -2   89.04   18.03
   5  23   3  -28.18   19.16
  -5 -23  -3   -2.25   13.52
   5  23   4   36.06   14.65
  -5 -23  -4   41.70   16.91
   5  23   5  214.14   23.67
  -5 -23  -5  175.82   21.41
   5  23   6    4.51   23.67
  -5 -23  -6    4.51   24.79
   5  23   7  -14.65   15.78
  -5 -23  -7   -1.13   14.65
   5  23   8   43.95   24.79
  -5 -23  -8   65.37   19.16
   5  23   9  286.27   27.05
  -5 -23  -9  275.00   27.05
   5  23  10   51.84   19.16
  -5 -23 -10   90.16   22.54
  -5 -24  12   -3.38   11.27
  -5 -24  11   10.14   14.65
  -5 -24  10   13.52   11.27
  -5 -24   9  344.87   21.41
  -5 -24   8    6.76   15.78
  -5 -24   7   -4.51   12.40
  -5 -24   6   20.29   13.52
  -5 -24   5  426.02   21.41
  -5 -24   4    7.89   10.14
  -5 -24   3    9.02   12.40
  -5 -24   2    0.00   12.40
  -5 -24   1  577.04   24.79
  -5 -24   0   16.91   11.27
  -5 -24  -1  -46.21   22.54
  -5 -24  -2    4.51   15.78
   5  24   3  464.34   36.06
  -5 -24  -3  438.41   22.54
   5  24   4   16.91   15.78
  -5 -24  -4   25.92   18.03
   5  24   5  -20.29   21.41
  -5 -24  -5  -22.54   15.78
   5  24   6   25.92   18.03
  -5 -24  -6   20.29   16.91
   5  24   7  358.40   29.30
  -5 -24  -7  382.06   32.68
   5  24   8  -12.40   18.03
  -5 -24  -8   -6.76   16.91
   5  24   9   13.52   23.67
  -5 -25  10   23.67   16.91
  -5 -25   9   15.78   15.78
  -5 -25   8   -1.13   10.14
  -5 -25   7  424.89   22.54
  -5 -25   6    2.25   12.40
  -5 -25   5  -11.27   12.40
  -5 -25   4   15.78   13.52
  -5 -25   3  295.28   19.16
  -5 -25   2   14.65   13.52
  -5 -25   1    2.25   13.52
  -5 -25   0  -11.27   11.27
  -5 -25  -1  294.15   19.16
  -5 -25  -2   20.29   16.91
  -5 -25  -3    4.51   13.52
   5  25   4  -14.65   18.03
  -5 -25  -4    9.02   11.27
   5  25   5  321.20   31.56
  -5 -25  -5  291.90   29.30
   5  25   6    7.89   16.91
  -5 -25  -6  -21.41   16.91
  -5 -26   7   -6.76   12.40
  -5 -26   6   80.02   19.16
  -5 -26   5  216.39   19.16
  -5 -26   4   49.59   18.03
  -5 -26   3   -2.25   18.03
  -5 -26   2   19.16   14.65
  -5 -26   1  194.98   19.16
  -5 -26   0   25.92   15.78
  -5 -26  -1   -6.76   12.40
  -5 -26  -2   28.18   19.16
  -5 -26  -3  245.69   32.68
   6   0 -26   -4.51   11.27
   6   0 -25    9.02   12.40
   6   0 -24  454.19   25.92
   6   0 -23   -1.13   15.78
   6   0 -22   11.27   15.78
   6   0 -21   -2.25   11.27
   6   0 -20  759.62   32.68
   6   0 -19   -1.13    9.02
   6   0 -18   47.34   13.52
   6   0 -17  -11.27    7.89
   6   0 -16  710.03   29.30
   6   0 -15   -5.64   10.14
   6   0 -14   -1.13   10.14
   6   0 -13    9.02    6.76
   6   0 -12 2287.87   78.89
   6   0  -9    0.00    1.13
   6   0  -8 2136.85   71.00
   6   0  -7    3.38    3.38
   6   0  -4 1841.57   61.99
   6   0  -3    1.13    3.38
   6   0  -2 1461.76   50.72
   6   0  -1   -1.13    2.25
   6   0   0 1460.63   49.59
   6   0   1    5.64    2.25
   6   0   2  380.94   14.65
   6   0  11    2.25   11.27
   6   0  12  662.69   34.94
   6   0  13   16.91    9.02
   6   0  14  569.15   31.56
   6   0  15  -16.91   11.27
   6   0  16  835.13   40.57
   6   0  17  -15.78   13.52
   6   0  18  241.18   27.05
   6   0  19  -20.29   12.40
   6   0  20  543.23   37.19
   6   0  22  152.15   27.05
   6   1 -26  114.96   16.91
  -6  -1  26  108.19   20.29
   6   1 -25    2.25   19.16
  -6  -1  25   -5.64   18.03
   6   1 -24   39.45   18.03
  -6  -1  24   33.81   12.40
   6   1 -23   42.83   11.27
  -6  -1  23   66.49   12.40
   6   1 -22  531.96   25.92
  -6  -1  22  587.18   27.05
   6   1 -21   19.16   15.78
  -6  -1  21   29.30   11.27
   6   1 -20   -3.38   15.78
  -6  -1  20  -18.03   14.65
   6   1 -19   12.40    9.02
  -6  -1  19   -2.25   12.40
   6   1 -18  303.17   19.16
  -6  -1  18  280.63   18.03
   6   1 -17    0.00   11.27
  -6  -1  17   20.29    7.89
   6   1 -16   12.40    7.89
  -6  -1  16   24.79    9.02
   6   1 -15   50.72   10.14
  -6  -1  15   50.72    9.02
   6   1 -14 1387.37   49.59
  -6  -1  14 1425.69   54.10
   6   1 -13   93.54   11.27
   6   1 -12    7.89    6.76
   6   1 -11   57.48    7.89
  -6  -1  11   73.26    7.89
   6   1 -10 2911.12   94.67
  -6  -1  10 2738.68   65.37
   6   1  -9   71.00    9.02
  -6  -1   9   72.13    4.51
   6   1  -8   23.67    5.64
   6   1  -7   67.62   12.40
   6   1  -6 1723.23   58.61
   6   1  -5  138.62    7.89
   6   1  -4    9.02    3.38
   6   1  -3  172.44    9.02
   6   1  -2 2016.25   68.75
   6   1  -1  125.10    5.64
   6   1   0  952.34   33.81
  -6  -1  -4  654.80   22.54
  -6  -1  -5  123.97    4.51
   6   1  11   39.45   13.52
  -6  -1 -11   93.54   15.78
   6   1  12  409.11   29.30
  -6  -1 -12  396.71   27.05
   6   1  13   27.05   10.14
  -6  -1 -13   25.92   14.65
   6   1  14  295.28   22.54
  -6  -1 -14  288.52   22.54
   6   1  15   41.70   13.52
  -6  -1 -15   52.97   12.40
   6   1  16  260.34   25.92
  -6  -1 -16  214.14   19.16
   6   1  17   18.03   12.40
  -6  -1 -17   14.65   11.27
   6   1  18  324.58   27.05
  -6  -1 -18  369.67   32.68
   6   1  19   64.24   16.91
  -6  -1 -19   32.68   21.41
   6   1  20  252.45   29.30
  -6  -1 -20  282.88   29.30
   6   1  21 -148.77   54.10
   6   1  22  297.54   28.18
  -6  -1 -22  276.12   25.92
  -6  -2  26   -5.64   12.40
   6   2 -25  121.72   32.68
  -6  -2  25  125.10   16.91
   6   2 -24  246.82   18.03
  -6  -2  24  259.22   23.67
   6   2 -23  136.37   14.65
  -6  -2  23  145.39   19.16
   6   2 -22    3.38   14.65
  -6  -2  22   -4.51   15.78
   6   2 -21  284.01   19.16
  -6  -2  21  298.66   21.41
   6   2 -20  273.87   19.16
  -6  -2  20  285.14   19.16
   6   2 -19  198.36   14.65
  -6  -2  19  193.85   14.65
   6   2 -18    3.38    9.02
  -6  -2  18    3.38   10.14
   6   2 -17  161.17   14.65
  -6  -2  17  162.29   12.40
   6   2 -16  508.29   22.54
  -6  -2  16  536.47   22.54
   6   2 -15  160.04   13.52
  -6  -2  15  166.80    5.64
   6   2 -14    4.51    6.76
  -6  -2  14   -3.38    1.13
   6   2 -13  374.17   16.91
  -6  -2  13  386.57   18.03
   6   2 -12  702.14   28.18
   6   2 -11  194.98   10.14
  -6  -2  11  214.14   10.14
   6   2 -10  209.63   11.27
  -6  -2  10  216.39   13.52
   6   2  -9   31.56    7.89
  -6  -2   9   39.45    5.64
   6   2  -8  854.29   22.54
   6   2  -7  125.10   16.91
  -6  -2   7  121.72    9.02
   6   2  -6  143.13    7.89
  -6  -2   6  123.97    9.02
   6   2  -5  288.52   12.40
  -6  -2   5  285.14   14.65
   6   2  -4 1563.19   51.84
  -6  -2   4 1582.35   60.86
   6   2  -3  169.05    7.89
  -6  -2   3  175.82   10.14
   6   2  -2    1.13    3.38
  -6  -2   2    0.00    2.25
   6   2  -1  371.92   14.65
  -6  -2  -5  444.05   16.91
  -6  -2  -6  282.88   11.27
  -6  -2  -7  540.97   20.29
  -6  -2  -8 1062.79   37.19
  -6  -2  -9  777.65   29.30
   6   2  11   87.91   13.52
  -6  -2 -11   90.16   13.52
   6   2  12  510.54   33.81
  -6  -2 -12  498.15   30.43
   6   2  13  171.31   16.91
  -6  -2 -13  152.15   18.03
   6   2  14  205.12   19.16
  -6  -2 -14  220.90   22.54
   6   2  15  -14.65   15.78
  -6  -2 -15  -39.45   15.78
   6   2  16  285.14   27.05
  -6  -2 -16  268.23   25.92
   6   2  17  355.01   27.05
  -6  -2 -17  304.30   20.29
   6   2  18  166.80   20.29
  -6  -2 -18  175.82   20.29
   6   2  19   20.29   16.91
  -6  -2 -19   -5.64   12.40
   6   2  20  157.78   21.41
  -6  -2 -20  181.45   27.05
   6   2  21  139.75   29.30
   6   2  22   82.27   24.79
  -6  -2 -22   92.42   24.79
  -6  -3  26   64.24   13.52
  -6  -3  25   29.30   12.40
  -6  -3  24    2.25   11.27
   6   3 -23  234.42   18.03
  -6  -3  23  252.45   18.03
   6   3 -22   94.67   13.52
  -6  -3  22   90.16   13.52
   6   3 -21  293.03   21.41
  -6  -3  21  289.65    7.89
   6   3 -20  -11.27   10.14
  -6  -3  20    0.00    2.25
   6   3 -19  451.94   23.67
  -6  -3  19  460.95   12.40
   6   3 -18  347.12   19.16
  -6  -3  18  367.41   12.40
   6   3 -17  290.77   18.03
  -6  -3  17  286.27   10.14
   6   3 -16    5.64    7.89
  -6  -3  16    4.51    2.25
   6   3 -15  643.53   27.05
  -6  -3  15  618.74   19.16
   6   3 -14   87.91   11.27
  -6  -3  14  108.19    5.64
   6   3 -13  445.18   19.16
  -6  -3  13  469.97   21.41
   6   3 -12    5.64    6.76
  -6  -3  12    4.51    3.38
   6   3 -11  814.84   30.43
  -6  -3  11  855.41   20.29
   6   3 -10  244.57   13.52
  -6  -3  10  253.58    9.02
   6   3  -9  721.30   28.18
  -6  -3   9  679.60   19.16
   6   3  -8    2.25    2.25
  -6  -3   8    3.38    5.64
   6   3  -7  153.28    5.64
  -6  -3   7  156.66    9.02
   6   3  -6  713.41   20.29
  -6  -3   6  769.76   30.43
   6   3  -5  348.25   13.52
  -6  -3   5  367.41   15.78
   6   3  -4    0.00    2.25
  -6  -3   4    2.25    3.38
   6   3  -3  587.18   20.29
  -6  -3   3  620.99   24.79
  -6  -3   2  219.77   10.14
  -6  -3   1  926.42   33.81
  -6  -3   0    0.00    2.25
  -6  -3  -1   89.04    4.51
  -6  -3  -2  393.33   14.65
  -6  -3  -6  227.66    9.02
  -6  -3  -7  657.06   23.67
  -6  -3  -8  198.36    9.02
  -6  -3  -9  318.95   13.52
  -6  -3 -10  173.56    7.89
   6   3  11  534.21   28.18
  -6  -3 -11  571.40   19.16
   6   3  12  121.72   16.91
  -6  -3 -12   45.08   15.78
   6   3  13   47.34   12.40
  -6  -3 -13   50.72   15.78
   6   3  14   68.75   13.52
  -6  -3 -14   84.53   18.03
   6   3  15  231.04   24.79
  -6  -3 -15  229.91   24.79
   6   3  16   41.70   13.52
  -6  -3 -16   40.57   13.52
   6   3  17   74.38   15.78
  -6  -3 -17   54.10   16.91
   6   3  18  105.94   22.54
  -6  -3 -18   84.53   20.29
   6   3  19  419.25   29.30
   6   3  20    2.25   13.52
  -6  -3 -20   32.68   15.78
   6   3  21   -6.76   20.29
  -6  -3 -21  -75.51   48.46
   6   3  22   15.78   23.67
  -6  -3 -22   49.59   18.03
  -6  -4  26  -13.52   12.40
  -6  -4  25  220.90   19.16
  -6  -4  24   -3.38   11.27
  -6  -4  23  171.31   14.65
  -6  -4  22   -9.02   11.27
   6   4 -21  367.41   22.54
  -6  -4  21  393.33   11.27
   6   4 -20   10.14   10.14
  -6  -4  20    3.38    3.38
   6   4 -19  313.31   16.91
  -6  -4  19  360.65   13.52
   6   4 -18    4.51    9.02
  -6  -4  18   -3.38    4.51
   6   4 -17  549.99   28.18
  -6  -4  17  542.10   18.03
   6   4 -16    7.89    7.89
  -6  -4  16   14.65    3.38
   6   4 -15  563.51   24.79
  -6  -4  15  584.93   18.03
   6   4 -14   15.78   10.14
  -6  -4  14    7.89    3.38
   6   4 -13  600.71   27.05
  -6  -4  13  544.35   19.16
   6   4 -12   -3.38    9.02
  -6  -4  12    2.25    2.25
   6   4 -11  974.88   38.32
  -6  -4  11  950.09   23.67
   6   4 -10   40.57    7.89
  -6  -4  10   57.48    2.25
   6   4  -9  383.19   16.91
  -6  -4   9  401.22   12.40
   6   4  -8   71.00    3.38
  -6  -4   8   84.53    7.89
   6   4  -7 1103.36   29.30
  -6  -4   7 1173.24   42.83
   6   4  -6  108.19    9.02
  -6  -4   6  121.72    6.76
  -6  -4   5  870.07   30.43
  -6  -4   4    1.13    3.38
  -6  -4   3  659.31   23.67
  -6  -4   2  142.01    6.76
  -6  -4   1  616.48   22.54
  -6  -4   0    9.02    2.25
  -6  -4  -1  684.11   24.79
  -6  -4  -2  111.58    5.64
  -6  -4  -3  350.51   13.52
  -6  -4  -6   -1.13    1.13
  -6  -4  -7  407.98   11.27
  -6  -4  -8   40.57    4.51
  -6  -4  -9 1175.49   39.45
  -6  -4 -10   22.54    2.25
   6   4  11  163.42   16.91
  -6  -4 -11  174.69    7.89
   6   4  12  -18.03   13.52
  -6  -4 -12    4.51    4.51
   6   4  13  384.32   25.92
  -6  -4 -13  432.78   12.40
   6   4  14   -4.51   14.65
  -6  -4 -14    9.02    3.38
   6   4  15   98.05   15.78
  -6  -4 -15   71.00   15.78
   6   4  16  -14.65   13.52
  -6  -4 -16    2.25   12.40
   6   4  17  726.93   40.57
  -6  -4 -17  611.98   41.70
   6   4  18    7.89   16.91
  -6  -4 -18   29.30   18.03
   6   4  19   33.81   14.65
  -6  -4 -19    7.89   20.29
   6   4  20   -2.25   16.91
  -6  -4 -20   21.41   20.29
   6   4  21  393.33   29.30
  -6  -4 -21  457.57   40.57
   6   4  22   -5.64   14.65
  -6  -4 -22    0.00   21.41
  -6  -5  26   -5.64   16.91
  -6  -5  25   69.88   19.16
  -6  -5  24   -4.51   16.91
  -6  -5  23  234.42   24.79
  -6  -5  22   56.35   18.03
  -6  -5  21  285.14   10.14
  -6  -5  20   -4.51    3.38
  -6  -5  19  327.97   12.40
  -6  -5  18   29.30    4.51
  -6  -5  17  232.17   10.14
   6   5 -16    5.64    7.89
  -6  -5  16   -2.25    4.51
   6   5 -15  400.10   19.16
  -6  -5  15  369.67   14.65
   6   5 -14   90.16   10.14
  -6  -5  14   85.65    6.76
   6   5 -13  460.95   21.41
  -6  -5  13  476.73   15.78
   6   5 -12   38.32    7.89
  -6  -5  12   24.79    3.38
   6   5 -11  663.82   25.92
  -6  -5  11  637.90   16.91
   6   5 -10  161.17   10.14
  -6  -5  10  181.45    5.64
   6   5  -9  934.31   36.06
  -6  -5   9  935.43   20.29
  -6  -5   8   18.03    2.25
   6   5  -7  890.35   36.06
  -6  -5   7  903.88   32.68
  -6  -5   6   48.46    5.64
  -6  -5   5  706.65   27.05
  -6  -5   4   77.76    6.76
  -6  -5   3 1086.46   38.32
  -6  -5   2  411.37   15.78
  -6  -5   1 1367.09   48.46
  -6  -5   0   24.79    3.38
  -6  -5  -8   -1.13    2.25
  -6  -5  -9  109.32    4.51
   6   5  10   61.99   12.40
  -6  -5 -10   65.37    3.38
   6   5  11 1051.52   45.08
  -6  -5 -11 1053.77   23.67
   6   5  12  -28.18   20.29
  -6  -5 -12   40.57    3.38
   6   5  13  152.15   16.91
  -6  -5 -13  148.77    5.64
   6   5  14   77.76   18.03
  -6  -5 -14   82.27    4.51
   6   5  15  365.16   24.79
  -6  -5 -15  421.51   13.52
   6   5  16    0.00    9.02
  -6  -5 -16   -3.38    4.51
   6   5  17   84.53   20.29
  -6  -5 -17   55.22   19.16
   6   5  18   46.21   14.65
  -6  -5 -18  -14.65   18.03
   6   5  19  341.49   29.30
  -6  -5 -19  378.68   31.56
   6   5  20   37.19   14.65
  -6  -5 -20   30.43   20.29
   6   5  21    7.89   14.65
  -6  -5 -21    2.25   21.41
   6   5  22   15.78   21.41
  -6  -5 -22   50.72   24.79
  -6  -6  26   33.81   19.16
  -6  -6  25   84.53   19.16
  -6  -6  24  203.99   21.41
  -6  -6  23  107.07   14.65
  -6  -6  22    7.89    6.76
  -6  -6  21   94.67    5.64
  -6  -6  20  391.08   11.27
  -6  -6  19  161.17    6.76
  -6  -6  18   -6.76    4.51
  -6  -6  17  166.80    6.76
  -6  -6  16  409.11   12.40
  -6  -6  15  242.31   11.27
  -6  -6  14  130.74    7.89
  -6  -6  13  329.09    9.02
  -6  -6  12  655.93   14.65
  -6  -6  11  281.76    9.02
  -6  -6  10   33.81    3.38
  -6  -6   9  243.44    7.89
  -6  -6   8  176.94    6.76
   6   6  -7  703.27   21.41
  -6  -6   7  716.79   27.05
  -6  -6   6   34.94    9.02
  -6  -6   5  508.29   20.29
  -6  -6   4  737.08   27.05
  -6  -6   3  379.81   15.78
  -6  -6   2   11.27    3.38
   6   6  -1  565.77   30.43
  -6  -6   1  601.83   23.67
   6   6   7  100.31   12.40
   6   6   8 1007.56   49.59
   6   6   9  716.79   34.94
  -6  -6  -9  685.23   27.05
   6   6  10  113.83   13.52
  -6  -6 -10   99.18    4.51
   6   6  11  264.85   20.29
  -6  -6 -11  259.22    7.89
   6   6  12 -182.58   83.40
  -6  -6 -12  229.91    6.76
   6   6  13  358.40   25.92
  -6  -6 -13  373.05   10.14
   6   6  14   36.06   16.91
  -6  -6 -14   24.79    3.38
   6   6  15   65.37   14.65
  -6  -6 -15   71.00    5.64
   6   6  16  180.32   19.16
  -6  -6 -16  166.80    6.76
   6   6  17  401.22   32.68
  -6  -6 -17  343.74   15.78
   6   6  18   63.11   16.91
  -6  -6 -18   33.81    5.64
   6   6  19   41.70   19.16
  -6  -6 -19   46.21   15.78
   6   6  20  146.51   20.29
  -6  -6 -20  169.05   23.67
   6   6  21  222.02   28.18
  -6  -6 -21  214.14   22.54
   6   6  22   74.38   18.03
  -6  -6 -22   45.08   21.41
  -6  -7  25    7.89   12.40
  -6  -7  24    0.00   12.40
  -6  -7  23   47.34   13.52
  -6  -7  22  420.38   16.91
  -6  -7  21   15.78    6.76
  -6  -7  20    1.13    4.51
  -6  -7  19   85.65    6.76
  -6  -7  18  751.73   20.29
  -6  -7  17   72.13    5.64
  -6  -7  16    4.51    5.64
  -6  -7  15   73.26    3.38
  -6  -7  14  533.08   12.40
  -6  -7  13  160.04    5.64
  -6  -7  12   23.67    2.25
  -6  -7  11   24.79    2.25
  -6  -7  10 1087.58   21.41
  -6  -7   9   60.86    4.51
  -6  -7   8  269.36    9.02
   6   7  -7  339.24   18.03
  -6  -7   7  333.60   11.27
   6   7  -6 1260.02   38.32
  -6  -7   6 1377.23   50.72
   6   7  -5  184.83    9.02
  -6  -7   5  194.98   10.14
   6   7  -4   13.52    5.64
  -6  -7   4   10.14    5.64
  -6  -7   3   11.27    4.51
   6   7  -2 2234.90   96.92
  -6  -7   2 2516.66   95.80
   6   7  -1  153.28   14.65
  -6  -7   1  169.05   15.78
   6   7   0  247.95   16.91
   6   7   1  101.43   11.27
   6   7   7  259.22   20.29
   6   7   8   71.00   11.27
   6   7   9   18.03   10.14
  -6  -7  -9   34.94   10.14
   6   7  10 1192.40   52.97
  -6  -7 -10 1200.29   34.94
   6   7  11   50.72   12.40
  -6  -7 -11   52.97    3.38
   6   7  12  179.20   23.67
  -6  -7 -12  200.61    6.76
   6   7  13  207.37   19.16
  -6  -7 -13  210.75    6.76
   6   7  14  294.15   24.79
  -6  -7 -14  322.33   10.14
   6   7  15  329.09   28.18
  -6  -7 -15  285.14   10.14
   6   7  16   59.73   16.91
  -6  -7 -16   43.95    5.64
   6   7  17    9.02   15.78
  -6  -7 -17   13.52    4.51
   6   7  18  211.88   27.05
  -6  -7 -18  238.93   12.40
   6   7  19   59.73   15.78
  -6  -7 -19   48.46   19.16
   6   7  20 -107.07   59.73
  -6  -7 -20  145.39   25.92
   6   7  21    3.38   14.65
  -6  -7 -21  -11.27   15.78
  -6  -8  25    6.76   13.52
  -6  -8  24  297.54   21.41
  -6  -8  23  -10.14   12.40
  -6  -8  22   16.91    7.89
  -6  -8  21    0.00    6.76
  -6  -8  20  571.40   16.91
  -6  -8  19   14.65    5.64
  -6  -8  18   13.52    4.51
  -6  -8  17   -3.38    2.25
  -6  -8  16  630.01   13.52
  -6  -8  15   15.78    3.38
  -6  -8  14   25.92    3.38
  -6  -8  13    1.13    3.38
  -6  -8  12  917.40   20.29
  -6  -8  11   95.80    4.51
  -6  -8  10   15.78    3.38
  -6  -8   9   43.95    4.51
  -6  -8   8 2203.34   57.48
  -6  -8   7   10.14    3.38
   6   8  -6    9.02    3.38
  -6  -8   6   10.14    6.76
   6   8  -5    6.76    4.51
  -6  -8   5    0.00    4.51
   6   8  -4 2110.93   85.65
  -6  -8   4 2299.14   59.73
  -6  -8   3   16.91    7.89
   6   8  -2   55.22    7.89
  -6  -8   2   38.32    9.02
   6   8  -1    7.89    6.76
  -6  -8   1    6.76    6.76
   6   8   0 2843.49  111.58
   6   8   1    0.00    5.64
   6   8   2   11.27    5.64
  -6  -8  -4  806.95   45.08
   6   8   5  130.74   16.91
   6   8   6  307.68   22.54
   6   8   7   -5.64    7.89
   6   8   8 1139.43   49.59
  -6  -8  -8 1077.44   47.34
   6   8   9   52.97   11.27
  -6  -8  -9   55.22   14.65
   6   8  10  179.20   21.41
  -6  -8 -10  210.75   10.14
   6   8  11   25.92   12.40
  -6  -8 -11   14.65    6.76
   6   8  12  427.14   31.56
  -6  -8 -12  426.02   12.40
   6   8  13   31.56   16.91
  -6  -8 -13    1.13    3.38
   6   8  14   48.46   13.52
  -6  -8 -14   56.35    5.64
  -6  -8 -15   -3.38    4.51
   6   8  16  511.67   32.68
  -6  -8 -16  465.46   14.65
   6   8  17  -14.65   11.27
  -6  -8 -17    3.38    4.51
   6   8  18  253.58   28.18
  -6  -8 -18  296.41   30.43
   6   8  19   -1.13   13.52
  -6  -8 -19  -13.52   20.29
   6   8  20  152.15   42.83
  -6  -8 -20  183.71   46.21
   6   8  21    1.13   21.41
  -6  -8 -21   12.40   22.54
  -6  -9  25    6.76   13.52
  -6  -9  24   -4.51   11.27
  -6  -9  23   41.70   13.52
  -6  -9  22  409.11   18.03
  -6  -9  21   85.65   11.27
  -6  -9  20   10.14    4.51
  -6  -9  19   48.46    2.25
  -6  -9  18  677.34   14.65
  -6  -9  17  119.47    5.64
  -6  -9  16   -2.25    2.25
  -6  -9  15   24.79    3.38
  -6  -9  14  829.49   15.78
  -6  -9  13   67.62    4.51
  -6  -9  12   -7.89    3.38
  -6  -9  11   39.45    4.51
  -6  -9  10  948.96   19.16
  -6  -9   9  285.14    9.02
   6   9  -8   58.61    9.02
  -6  -9   8   56.35    4.51
  -6  -9   7   24.79    4.51
   6   9  -6 2249.55   69.88
  -6  -9   6 2384.79   45.08
   6   9  -5  231.04   13.52
  -6  -9   5  237.80    9.02
  -6  -9   4    5.64    4.51
   6   9  -3    9.02    5.64
  -6  -9   3   13.52    7.89
   6   9  -2  877.96   39.45
  -6  -9   2  938.82   40.57
   6   9  -1  320.08   19.16
  -6  -9   1  349.38   22.54
   6   9   0   80.02   11.27
   6   9   1    1.13    9.02
   6   9   2 1291.58   52.97
   6   9   3   61.99   12.40
   6   9   4  140.88   14.65
  -6  -9  -4  148.77   15.78
   6   9   5    6.76   14.65
  -6  -9  -5    6.76    9.02
   6   9   6  801.32   40.57
   6   9   7   73.26   15.78
  -6  -9  -7   28.18   33.81
   6   9   8  122.85   14.65
  -6  -9  -8  121.72   16.91
   6   9   9   11.27    9.02
  -6  -9  -9   23.67   11.27
   6   9  10  799.06   40.57
  -6  -9 -10  721.30   52.97
   6   9  11  104.81   15.78
  -6  -9 -11  116.08    7.89
   6   9  12  166.80   18.03
  -6  -9 -12  158.91   10.14
   6   9  13   -2.25   16.91
  -6  -9 -13    2.25    3.38
   6   9  14  619.87   38.32
  -6  -9 -14  599.58   15.78
   6   9  15   -4.51   18.03
  -6  -9 -15   64.24    5.64
   6   9  16  202.87   24.79
  -6  -9 -16  158.91    7.89
   6   9  17  -12.40   12.40
  -6  -9 -17    0.00    4.51
   6   9  18  347.12   30.43
  -6  -9 -18  324.58   28.18
   6   9  19   63.11   22.54
  -6  -9 -19   80.02   19.16
   6   9  20  139.75   21.41
  -6  -9 -20  123.97   29.30
   6   9  21   10.14   20.29
  -6  -9 -21    0.00   21.41
  -6 -10  24  178.07   18.03
  -6 -10  23  105.94   15.78
  -6 -10  22   10.14    9.02
  -6 -10  21  130.74   11.27
  -6 -10  20  215.26   10.14
  -6 -10  19  114.96    5.64
  -6 -10  18   -2.25    2.25
  -6 -10  17  165.67    5.64
  -6 -10  16  410.24    9.02
  -6 -10  15  122.85    5.64
  -6 -10  14    3.38    2.25
  -6 -10  13  270.49    7.89
  -6 -10  12  704.39   14.65
  -6 -10  11  294.15    9.02
  -6 -10  10    6.76    3.38
  -6 -10   9   27.05    4.51
   6  10  -8  854.29   40.57
  -6 -10   8  901.62   24.79
  -6 -10   7  823.86   20.29
   6  10  -6   24.79   23.67
  -6 -10   6   30.43    3.38
   6  10  -5  196.10   15.78
  -6 -10   5  241.18   15.78
   6  10  -4 1173.24   76.64
  -6 -10   4 1187.89   37.19
   6  10  -3  987.28   40.57
  -6 -10   3 1012.07   43.95
   6  10  -2   22.54    6.76
  -6 -10   2   16.91    7.89
   6  10  -1   23.67    9.02
  -6 -10   1   37.19   10.14
   6  10   0  368.54   20.29
  -6 -10   0  362.90   21.41
   6  10   1 1137.17   50.72
  -6 -10  -1 1220.57   55.22
   6  10   2    9.02   10.14
  -6 -10  -2   18.03    7.89
   6  10   3   75.51   12.40
  -6 -10  -3   49.59   16.91
   6  10   4  579.29   28.18
  -6 -10  -4  555.63   29.30
   6  10   5  520.69   25.92
  -6 -10  -5  502.65   30.43
   6  10   6  146.51   14.65
  -6 -10  -6  119.47   14.65
   6  10   7   83.40   15.78
  -6 -10  -7   84.53   14.65
   6  10   8  380.94   22.54
  -6 -10  -8  366.28   24.79
   6  10   9  411.37   25.92
  -6 -10  -9  476.73   30.43
   6  10  10   76.64   13.52
   6  10  11   18.03   12.40
  -6 -10 -11   12.40    5.64
   6  10  12  228.79   20.29
  -6 -10 -12  250.20   13.52
  -6 -10 -13  117.21   11.27
   6  10  14  187.09   21.41
  -6 -10 -14  175.82    9.02
  -6 -10 -15    5.64    4.51
   6  10  16  180.32   24.79
  -6 -10 -16  156.66    7.89
   6  10  17  103.69   23.67
  -6 -10 -17  147.64    7.89
   6  10  18  100.31   18.03
  -6 -10 -18  101.43   20.29
  -6 -10 -19   -3.38   13.52
   6  10  20  145.39   25.92
  -6 -10 -20  131.86   25.92
  -6 -11  24    9.02   12.40
  -6 -11  23  280.63   22.54
  -6 -11  22   75.51   14.65
  -6 -11  21  311.06   15.78
  -6 -11  20   -1.13    7.89
  -6 -11  19  237.80    9.02
  -6 -11  18   76.64    4.51
  -6 -11  17  243.44    7.89
  -6 -11  16   -4.51    3.38
  -6 -11  15  261.47    6.76
  -6 -11  14  285.14    7.89
  -6 -11  13  500.40   11.27
  -6 -11  12   21.41    3.38
  -6 -11  11  333.60    9.02
  -6 -11  10   93.54    5.64
  -6 -11   9  708.90   15.78
   6  11  -8   25.92    6.76
  -6 -11   8   20.29    3.38
  -6 -11   7  185.96    5.64
   6  11  -6  305.42   92.42
  -6 -11   6  485.75   14.65
  -6 -11   5  652.55   18.03
   6  11  -4  293.03   12.40
  -6 -11   4  317.82   14.65
   6  11  -3  116.08   10.14
  -6 -11   3  108.19   14.65
   6  11  -2  209.63   14.65
  -6 -11   2  250.20   16.91
   6  11  -1  813.71   38.32
  -6 -11   1  828.37   42.83
   6  11   0   13.52    6.76
  -6 -11   0    7.89    6.76
   6  11   1   56.35   12.40
  -6 -11  -1   23.67   10.14
   6  11   2  270.49   13.52
  -6 -11  -2  237.80   32.68
   6  11   3  882.46   38.32
  -6 -11  -3  822.73   41.70
   6  11   4   34.94    9.02
  -6 -11  -4   14.65    6.76
   6  11   5  160.04   15.78
  -6 -11  -5  169.05   11.27
   6  11   6  223.15   16.91
  -6 -11  -6  220.90   19.16
   6  11   7  908.39   41.70
  -6 -11  -7  849.78   45.08
   6  11   8  166.80   15.78
  -6 -11  -8  160.04   18.03
   6  11   9   71.00   13.52
  -6 -11  -9   52.97   20.29
   6  11  10   29.30   16.91
  -6 -11 -10   61.99   13.52
   6  11  11  729.19   28.18
  -6 -11 -11  799.06   42.83
   6  11  12   86.78   22.54
  -6 -11 -12  100.31    9.02
   6  11  13   77.76   14.65
  -6 -11 -13   86.78    9.02
   6  11  14  105.94   18.03
  -6 -11 -14  102.56    9.02
   6  11  15  350.51   30.43
  -6 -11 -15  359.52   13.52
   6  11  16   71.00   15.78
  -6 -11 -16   71.00    6.76
   6  11  17   12.40   19.16
  -6 -11 -17    1.13    6.76
   6  11  18   94.67   22.54
  -6 -11 -18   71.00   18.03
   6  11  19  251.33   27.05
  -6 -11 -19  264.85   24.79
   6  11  20   13.52   15.78
  -6 -11 -20   21.41   24.79
  -6 -12  23  122.85   16.91
  -6 -12  22   -6.76   11.27
  -6 -12  21  309.93   21.41
  -6 -12  20    6.76   11.27
  -6 -12  19  175.82   11.27
  -6 -12  18    0.00    4.51
  -6 -12  17  338.11   11.27
  -6 -12  16   23.67    4.51
  -6 -12  15  433.91   10.14
  -6 -12  14   92.42    4.51
  -6 -12  13  284.01    7.89
  -6 -12  12   16.91    4.51
  -6 -12  11  525.20   12.40
  -6 -12  10   11.27    3.38
  -6 -12   9  291.90    9.02
  -6 -12   8   -2.25    3.38
   6  12  -7 1072.93   50.72
  -6 -12   7 1024.47   21.41
   6  12  -6   95.80   10.14
  -6 -12   6   73.26    6.76
  -6 -12   5  207.37    9.02
   6  12  -4   -4.51    7.89
  -6 -12   4    1.13    4.51
   6  12  -3  983.90   43.95
   6  12  -2   90.16   10.14
  -6 -12   2   89.04   11.27
   6  12  -1  262.60   18.03
  -6 -12   1  225.41   20.29
   6  12   0  -11.27    5.64
  -6 -12   0    5.64    7.89
   6  12   1 1004.18   31.56
  -6 -12  -1  964.74   45.08
   6  12   2    2.25    6.76
  -6 -12  -2    2.25    7.89
   6  12   3  163.42   16.91
  -6 -12  -3  166.80   12.40
   6  12   4   13.52    6.76
  -6 -12  -4   20.29    6.76
   6  12   5 1016.58   33.81
  -6 -12  -5 1048.14   36.06
   6  12   6   90.16   11.27
  -6 -12  -6   90.16   12.40
   6  12   7   72.13   10.14
  -6 -12  -7   30.43   19.16
   6  12   8   15.78   11.27
  -6 -12  -8   22.54   11.27
   6  12   9 1061.66   52.97
  -6 -12  -9 1058.28   51.84
   6  12  10    9.02   16.91
  -6 -12 -10    3.38   12.40
   6  12  11   91.29   16.91
  -6 -12 -11   84.53   20.29
  -6 -12 -12   24.79    7.89
   6  12  13  529.70   39.45
  -6 -12 -13  553.37   21.41
   6  12  14   42.83   18.03
  -6 -12 -14   48.46    6.76
   6  12  15   46.21   18.03
  -6 -12 -15   14.65    6.76
   6  12  16   33.81   13.52
  -6 -12 -16   18.03    6.76
   6  12  17  491.38   33.81
  -6 -12 -17  464.34   33.81
   6  12  18   14.65   14.65
  -6 -12 -18   -6.76   15.78
   6  12  19   52.97   22.54
  -6 -12 -19   16.91   15.78
  -6 -13  23  137.50   16.91
  -6 -13  22   22.54   13.52
  -6 -13  21  108.19   14.65
  -6 -13  20   14.65   12.40
  -6 -13  19  261.47   13.52
  -6 -13  18   48.46    5.64
  -6 -13  17  147.64    6.76
  -6 -13  16   30.43    6.76
  -6 -13  15  180.32    6.76
  -6 -13  14   84.53    5.64
  -6 -13  13  542.10   12.40
  -6 -13  12   84.53    5.64
  -6 -13  11  104.81    5.64
  -6 -13  10  100.31    5.64
  -6 -13   9  428.27   10.14
  -6 -13   8   31.56    4.51
   6  13  -7  120.59   12.40
  -6 -13   7  119.47    6.76
   6  13  -6  119.47   13.52
  -6 -13   6  117.21    7.89
   6  13  -5  893.73  143.13
  -6 -13   5  852.03   22.54
  -6 -13   4  138.62    7.89
   6  13  -3  261.47   13.52
  -6 -13   3  244.57   18.03
   6  13  -2   95.80   12.40
  -6 -13   2  110.45    9.02
   6  13  -1  744.97   27.05
  -6 -13   1  752.86   36.06
   6  13   0    3.38    5.64
  -6 -13   0   12.40   12.40
   6  13   1  340.36   15.78
  -6 -13  -1  340.36   21.41
   6  13   2   12.40    6.76
  -6 -13  -2   21.41    9.02
   6  13   3  929.80   32.68
  -6 -13  -3  919.66   43.95
   6  13   4   10.14    9.02
  -6 -13  -4   21.41    6.76
   6  13   5  229.91   13.52
  -6 -13  -5  216.39   21.41
   6  13   6  104.81   11.27
  -6 -13  -6  120.59   14.65
   6  13   7  986.15   45.08
  -6 -13  -7  998.55   49.59
   6  13   8   19.16    9.02
  -6 -13  -8   18.03   12.40
   6  13   9   67.62   11.27
  -6 -13  -9   75.51   20.29
   6  13  10   68.75   10.14
  -6 -13 -10   72.13   14.65
   6  13  11  671.71   42.83
  -6 -13 -11  655.93   41.70
   6  13  12  -10.14   14.65
  -6 -13 -12   19.16   12.40
   6  13  13  105.94   20.29
  -6 -13 -13   63.11   10.14
   6  13  14  -24.79   16.91
  -6 -13 -14   12.40    6.76
   6  13  15  627.76   37.19
  -6 -13 -15  489.13   20.29
   6  13  16   20.29   18.03
  -6 -13 -16    9.02    7.89
   6  13  17    9.02   19.16
  -6 -13 -17   11.27   15.78
   6  13  18  -27.05   20.29
  -6 -13 -18   14.65   18.03
   6  13  19  282.88   25.92
  -6 -13 -19  341.49   33.81
  -6 -14  21  118.34   14.65
  -6 -14  20  156.66   19.16
  -6 -14  19   99.18   11.27
  -6 -14  18   15.78    6.76
  -6 -14  17  165.67    9.02
  -6 -14  16  298.66    9.02
  -6 -14  15  282.88    9.02
  -6 -14  14   16.91    4.51
  -6 -14  13  207.37    6.76
  -6 -14  12  442.92   10.14
  -6 -14  11  134.12    6.76
  -6 -14  10   -3.38    3.38
  -6 -14   9  351.63    9.02
  -6 -14   8  346.00   11.27
  -6 -14   7  622.12   14.65
   6  14  -6   -7.89    7.89
  -6 -14   6   -3.38    5.64
  -6 -14   5   49.59    7.89
  -6 -14   4  563.51   16.91
   6  14  -3  395.59   27.05
  -6 -14   3  404.60   13.52
   6  14  -2   -5.64    6.76
  -6 -14   2  -11.27    5.64
   6  14  -1  167.93   11.27
  -6 -14   1  157.78   18.03
   6  14   0  256.96   13.52
  -6 -14   0  253.58   19.16
   6  14   1  756.24   27.05
  -6 -14  -1  682.98   36.06
   6  14   2   65.37   11.27
  -6 -14  -2   59.73   10.14
   6  14   3   31.56    7.89
  -6 -14  -3   43.95   11.27
   6  14   4  410.24   19.16
  -6 -14  -4  362.90   25.92
   6  14   5  868.94   30.43
  -6 -14  -5  805.83   38.32
   6  14   6   31.56    9.02
  -6 -14  -6   29.30   10.14
   6  14   7    4.51    9.02
  -6 -14  -7   18.03   10.14
   6  14   8  309.93   22.54
  -6 -14  -8  312.19   16.91
   6  14   9  553.37   23.67
  -6 -14  -9  628.88   37.19
   6  14  10   -2.25   10.14
  -6 -14 -10  -20.29   16.91
   6  14  11   56.35   18.03
   6  14  12  178.07   16.91
  -6 -14 -12  171.31   22.54
   6  14  13  466.59   32.68
  -6 -14 -13  454.19   21.41
   6  14  14    3.38   13.52
  -6 -14 -14   10.14    7.89
   6  14  15   10.14   13.52
  -6 -14 -15   22.54    6.76
   6  14  16   89.04   18.03
  -6 -14 -16   85.65   18.03
   6  14  17  317.82   27.05
  -6 -14 -17  251.33   28.18
   6  14  18   25.92   23.67
  -6 -14 -18   71.00   25.92
  -6 -15  21   45.08   12.40
  -6 -15  20   48.46   16.91
  -6 -15  19   28.18   15.78
  -6 -15  18  269.36   11.27
  -6 -15  17   84.53    7.89
  -6 -15  16   -2.25    4.51
  -6 -15  15  105.94    6.76
  -6 -15  14  449.68   13.52
  -6 -15  13   50.72    6.76
  -6 -15  12   12.40    3.38
  -6 -15  11   37.19    5.64
  -6 -15  10  533.08   12.40
  -6 -15   9  206.25    7.89
  -6 -15   8   -4.51    5.64
  -6 -15   7   46.21    5.64
   6  15  -6  580.42   32.68
  -6 -15   6  582.67   16.91
  -6 -15   5  346.00   12.40
   6  15  -4   -7.89   40.57
  -6 -15   4   11.27    5.64
   6  15  -3    9.02    9.02
  -6 -15   3   18.03    5.64
   6  15  -2  856.54   41.70
  -6 -15   2  808.08   22.54
   6  15  -1  144.26   11.27
  -6 -15   1  137.50   11.27
   6  15   0   -1.13    5.64
  -6 -15   0    5.64    7.89
   6  15   1   51.84    7.89
  -6 -15  -1   56.35   14.65
   6  15   2  733.70   25.92
  -6 -15  -2  715.66   24.79
   6  15   3  101.43   10.14
  -6 -15  -3   99.18   12.40
   6  15   4    5.64   10.14
  -6 -15  -4   -6.76    6.76
   6  15   5   -2.25    6.76
  -6 -15  -5   -2.25    6.76
   6  15   6  619.87   34.94
  -6 -15  -6  560.13   24.79
   6  15   7  253.58   20.29
  -6 -15  -7  223.15   14.65
   6  15   8   15.78   11.27
  -6 -15  -8   23.67   11.27
   6  15   9   -7.89   10.14
  -6 -15  -9  -18.03   27.05
   6  15  10  349.38   29.30
   6  15  11  154.40   19.16
  -6 -15 -11  234.42   25.92
   6  15  12   31.56   15.78
  -6 -15 -12   49.59   19.16
   6  15  13  -11.27   19.16
  -6 -15 -13   11.27    6.76
   6  15  14  229.91   25.92
  -6 -15 -14  211.88   13.52
   6  15  15  194.98   27.05
  -6 -15 -15  160.04   15.78
   6  15  16   39.45   25.92
  -6 -15 -16   13.52   22.54
   6  15  17   28.18   21.41
  -6 -15 -17   63.11   25.92
   6  15  18  127.35   20.29
  -6 -15 -18  136.37   29.30
  -6 -16  21   -5.64   16.91
  -6 -16  20  287.39   22.54
  -6 -16  19   -2.25   12.40
  -6 -16  18    2.25   11.27
  -6 -16  17   -4.51    7.89
  -6 -16  16  462.08   15.78
  -6 -16  15   -7.89    4.51
  -6 -16  14   -2.25    4.51
  -6 -16  13    7.89    4.51
  -6 -16  12  497.02   13.52
  -6 -16  11    6.76    4.51
  -6 -16  10   -3.38    3.38
  -6 -16   9    2.25    6.76
  -6 -16   8  847.53   19.16
  -6 -16   7   30.43    5.64
   6  16  -6   10.14    9.02
  -6 -16   6   10.14    4.51
   6  16  -5    4.51   13.52
  -6 -16   5   19.16    6.76
   6  16  -4  599.58  160.04
  -6 -16   4  827.24   22.54
  -6 -16   3   29.30    7.89
   6  16  -2   36.06   12.40
  -6 -16   2   56.35    7.89
   6  16  -1  -10.14   11.27
  -6 -16   1   -6.76    6.76
   6  16   0 1063.92   37.19
  -6 -16   0 1062.79   38.32
   6  16   1   75.51   10.14
  -6 -16  -1   74.38   11.27
   6  16   2   22.54    9.02
  -6 -16  -2   58.61   10.14
   6  16   3   -6.76   10.14
  -6 -16  -3  -16.91    7.89
   6  16   4 1010.94   36.06
  -6 -16  -4  951.21   32.68
   6  16   5   -2.25   11.27
  -6 -16  -5   22.54   11.27
   6  16   6  225.41   21.41
  -6 -16  -6  234.42   15.78
  -6 -16  -7  -15.78   15.78
   6  16   8  702.14   43.95
  -6 -16  -8  696.50   42.83
   6  16   9   24.79   16.91
  -6 -16  -9  -16.91   11.27
   6  16  10  120.59   18.03
  -6 -16 -10   74.38   31.56
   6  16  11   -6.76   16.91
  -6 -16 -11  -31.56   13.52
   6  16  12  417.00   32.68
  -6 -16 -12  401.22   31.56
   6  16  13   43.95   15.78
  -6 -16 -13   24.79   15.78
   6  16  14   55.22   16.91
  -6 -16 -14   46.21   23.67
   6  16  15  -15.78   14.65
  -6 -16 -15   27.05   22.54
   6  16  16  152.15   47.34
  -6 -16 -16  173.56   30.43
   6  16  17   18.03   15.78
  -6 -16 -17   23.67   18.03
  -6 -17  21  -19.16   16.91
  -6 -17  20    4.51   16.91
  -6 -17  19  -20.29   18.03
  -6 -17  18  331.35   28.18
  -6 -17  17   12.40    9.02
  -6 -17  16   -3.38    6.76
  -6 -17  15    9.02    7.89
  -6 -17  14  441.80   13.52
  -6 -17  13   34.94    5.64
  -6 -17  12    5.64    6.76
  -6 -17  11   -2.25    6.76
  -6 -17  10  380.94   11.27
  -6 -17   9   75.51    6.76
  -6 -17   8   -2.25    6.76
  -6 -17   7    6.76    6.76
  -6 -17   6  460.95   12.40
   6  17  -5  108.19   15.78
  -6 -17   5   99.18    9.02
   6  17  -4   18.03   10.14
  -6 -17   4   18.03    7.89
  -6 -17   3   27.05    6.76
   6  17  -2  602.96   31.56
  -6 -17   2  607.47   18.03
   6  17  -1   -4.51    9.02
  -6 -17   1   15.78    6.76
   6  17   0   68.75   14.65
  -6 -17   0   67.62    7.89
   6  17   1   15.78    9.02
  -6 -17  -1   13.52    6.76
   6  17   2  888.10   30.43
  -6 -17  -2  883.59   30.43
   6  17   3   -1.13    6.76
  -6 -17  -3    4.51    9.02
   6  17   4   11.27    7.89
  -6 -17  -4   16.91    7.89
  -6 -17  -5   68.75   15.78
   6  17   6  323.46  126.23
  -6 -17  -6  493.64   29.30
   6  17   7    7.89   10.14
  -6 -17  -7   37.19   14.65
   6  17   8  109.32   21.41
  -6 -17  -8  142.01   18.03
   6  17   9    9.02   12.40
  -6 -17  -9    5.64   13.52
   6  17  10  465.46   36.06
  -6 -17 -10  429.40   33.81
   6  17  11   14.65   14.65
  -6 -17 -11  -31.56   19.16
   6  17  12   73.26   15.78
  -6 -17 -12   76.64   22.54
   6  17  13  -24.79   14.65
  -6 -17 -13  -20.29   21.41
   6  17  14  316.70   30.43
  -6 -17 -14  355.01   31.56
   6  17  15    3.38   20.29
  -6 -17 -15   -9.02   19.16
   6  17  16   56.35   23.67
  -6 -17 -16   34.94   19.16
  -6 -18  20   64.24   20.29
  -6 -18  19   73.26   20.29
  -6 -18  18    6.76   18.03
  -6 -18  17   72.13   11.27
  -6 -18  16  190.47   16.91
  -6 -18  15  114.96   12.40
  -6 -18  14   -4.51    6.76
  -6 -18  13   99.18    7.89
  -6 -18  12  229.91   10.14
  -6 -18  11  117.21    7.89
  -6 -18  10  -18.03    6.76
  -6 -18   9   89.04    9.02
  -6 -18   8  419.25   14.65
  -6 -18   7  290.77   11.27
  -6 -18   6   29.30    6.76
  -6 -18   5   85.65    7.89
   6  18  -4  464.34   28.18
  -6 -18   4  473.35   16.91
  -6 -18   3  176.94   10.14
   6  18  -2    5.64   15.78
  -6 -18   2   12.40    7.89
   6  18  -1  138.62   18.03
  -6 -18   1  107.07    9.02
   6  18   0  492.51   31.56
  -6 -18   0  497.02   16.91
   6  18   1  132.99   18.03
  -6 -18  -1  158.91   11.27
   6  18   2  119.47   12.40
  -6 -18  -2  120.59   11.27
   6  18   3   13.52   24.79
  -6 -18  -3  -23.67   25.92
   6  18   4  378.68   48.46
  -6 -18  -4  338.11   27.05
  -6 -18  -5   85.65   19.16
   6  18   6   41.70   12.40
  -6 -18  -6   54.10   19.16
   6  18   7   51.84   18.03
  -6 -18  -7    5.64   20.29
   6  18   8  174.69   19.16
  -6 -18  -8  224.28   23.67
   6  18   9  170.18   24.79
  -6 -18  -9  114.96   19.16
   6  18  10    6.76   13.52
  -6 -18 -10   66.49   15.78
   6  18  11   11.27   19.16
  -6 -18 -11   24.79   15.78
   6  18  12  201.74   27.05
  -6 -18 -12  173.56   21.41
   6  18  13  110.45   21.41
  -6 -18 -13   92.42   21.41
   6  18  14   49.59   16.91
  -6 -18 -14   41.70   20.29
   6  18  15  -19.16   15.78
  -6 -18 -15  -27.05   25.92
  -6 -19  19  125.10   19.16
  -6 -19  18   38.32   14.65
  -6 -19  17  111.58   18.03
  -6 -19  16   -9.02    7.89
  -6 -19  15  135.24   11.27
  -6 -19  14   51.84   11.27
  -6 -19  13  128.48    9.02
  -6 -19  12   -5.64    7.89
  -6 -19  11  169.05   11.27
  -6 -19  10  121.72    9.02
  -6 -19   9  331.35   13.52
  -6 -19   8    1.13    7.89
  -6 -19   7  192.72   11.27
  -6 -19   6  271.61   12.40
  -6 -19   5  368.54   15.78
   6  19  -4   10.14   12.40
  -6 -19   4   16.91   10.14
   6  19  -3   99.18   20.29
  -6 -19   3  118.34   10.14
   6  19  -2   56.35   24.79
  -6 -19   2   46.21   10.14
   6  19  -1  240.06   24.79
  -6 -19   1  240.06   15.78
   6  19   0    9.02   11.27
  -6 -19   0  -16.91   15.78
   6  19   1   96.92   14.65
  -6 -19  -1   86.78   19.16
   6  19   2  111.58   16.91
  -6 -19  -2  113.83   21.41
   6  19   3  401.22   31.56
  -6 -19  -3  350.51   29.30
   6  19   4 -143.13   94.67
  -6 -19  -4   32.68   18.03
   6  19   5   65.37   18.03
  -6 -19  -5   47.34   19.16
   6  19   6   45.08   16.91
  -6 -19  -6   13.52   18.03
   6  19   7  276.12   23.67
  -6 -19  -7  276.12   27.05
   6  19   8   45.08   14.65
  -6 -19  -8   51.84   20.29
   6  19   9   29.30   15.78
  -6 -19  -9   36.06   21.41
   6  19  10  112.70   22.54
  -6 -19 -10   76.64   22.54
   6  19  11  304.30   25.92
  -6 -19 -11  315.57   31.56
   6  19  12   14.65   14.65
  -6 -19 -12   -4.51   23.67
   6  19  13   46.21   24.79
  -6 -19 -13    2.25   27.05
   6  19  14  120.59   27.05
  -6 -19 -14  114.96   22.54
   6  19  15  275.00   32.68
  -6 -20  18   -2.25   14.65
  -6 -20  17  111.58   20.29
  -6 -20  16  -14.65   12.40
  -6 -20  15  117.21   15.78
  -6 -20  14   15.78   10.14
  -6 -20  13  102.56   14.65
  -6 -20  12   20.29    6.76
  -6 -20  11  226.53   12.40
  -6 -20  10    2.25    9.02
  -6 -20   9  220.90   13.52
  -6 -20   8  -14.65    7.89
  -6 -20   7  386.57   14.65
  -6 -20   6   15.78    7.89
  -6 -20   5  148.77   10.14
  -6 -20   4   14.65   10.14
   6  20  -3  486.88   34.94
  -6 -20   3  475.61   20.29
   6  20  -2    9.02   16.91
  -6 -20   2    0.00   11.27
   6  20  -1   87.91   20.29
  -6 -20   1  120.59   16.91
   6  20   0   10.14   15.78
  -6 -20   0   -5.64   16.91
   6  20   1  625.50   39.45
  -6 -20  -1  653.68   37.19
   6  20   2   25.92   16.91
  -6 -20  -2   63.11   20.29
   6  20   3   93.54   19.16
  -6 -20  -3   89.04   28.18
   6  20   4   23.67   13.52
  -6 -20  -4   54.10   16.91
   6  20   5  438.41   31.56
  -6 -20  -5  431.65   30.43
   6  20   6  -10.14   18.03
  -6 -20  -6    4.51   13.52
   6  20   7   52.97   16.91
  -6 -20  -7   52.97   15.78
   6  20   8  -15.78   19.16
  -6 -20  -8   21.41   14.65
   6  20   9  361.78   29.30
  -6 -20  -9  380.94   30.43
   6  20  10   -2.25   15.78
  -6 -20 -10   10.14   15.78
   6  20  11   11.27   21.41
  -6 -20 -11   61.99   20.29
   6  20  12   18.03   15.78
  -6 -20 -12   20.29   24.79
   6  20  13  277.25   27.05
  -6 -20 -13  290.77   31.56
  -6 -21  17   76.64   23.67
  -6 -21  16    2.25   21.41
  -6 -21  15  118.34   11.27
  -6 -21  14   40.57   10.14
  -6 -21  13  194.98   15.78
  -6 -21  12    3.38   10.14
  -6 -21  11  107.07   13.52
  -6 -21  10   21.41    9.02
  -6 -21   9  206.25   18.03
  -6 -21   8   12.40    9.02
  -6 -21   7  191.59   16.91
  -6 -21   6   46.21   11.27
  -6 -21   5  430.53   19.16
  -6 -21   4   -9.02   10.14
  -6 -21   3   40.57   12.40
   6  21  -2    2.25   18.03
  -6 -21   2   20.29   13.52
   6  21  -1  530.83   34.94
  -6 -21   1  495.89   32.68
   6  21   0   -5.64   18.03
  -6 -21   0    2.25   19.16
   6  21   1   90.16   20.29
  -6 -21  -1  107.07   21.41
   6  21   2   23.67   14.65
  -6 -21  -2  -41.70   22.54
   6  21   3  502.65   32.68
  -6 -21  -3  462.08   31.56
   6  21   4   16.91   13.52
  -6 -21  -4    9.02   15.78
   6  21   5   77.76   21.41
  -6 -21  -5   77.76   18.03
   6  21   6   28.18   15.78
  -6 -21  -6  -69.88   38.32
  -6 -21  -7  398.97   31.56
   6  21   8   31.56   16.91
  -6 -21  -8   18.03   15.78
   6  21   9   66.49   24.79
  -6 -21  -9   13.52   15.78
   6  21  10   -9.02   14.65
  -6 -21 -10   13.52   16.91
   6  21  11  366.28   29.30
  -6 -21 -11  342.62   29.30
   6  21  12   23.67   23.67
  -6 -21 -12  -18.03   19.16
  -6 -22  15  117.21   20.29
  -6 -22  14    0.00   13.52
  -6 -22  13   73.26   15.78
  -6 -22  12   96.92   13.52
  -6 -22  11  210.75   14.65
  -6 -22  10   -5.64   12.40
  -6 -22   9   78.89   11.27
  -6 -22   8  176.94   18.03
  -6 -22   7  250.20   16.91
  -6 -22   6    4.51   11.27
  -6 -22   5   36.06   11.27
  -6 -22   4  151.02   12.40
  -6 -22   3  178.07   16.91
  -6 -22   2   -4.51   10.14
   6  22  -1   59.73   20.29
  -6 -22   1   54.10   16.91
   6  22   0  136.37   22.54
  -6 -22   0  152.15   24.79
   6  22   1  236.68   25.92
  -6 -22  -1  297.54   29.30
   6  22   2    6.76   13.52
  -6 -22  -2   25.92   20.29
   6  22   3   39.45   14.65
  -6 -22  -3   28.18   15.78
   6  22   4   74.38   21.41
  -6 -22  -4   91.29   19.16
   6  22   5  291.90   25.92
  -6 -22  -5  305.42   24.79
   6  22   6   40.57   16.91
  -6 -22  -6    6.76   15.78
   6  22   8  113.83   21.41
  -6 -22  -8  118.34   20.29
   6  22   9  268.23   27.05
  -6 -22  -9  262.60   27.05
   6  22  10   36.06   23.67
  -6 -22 -10   27.05   18.03
   6  22  11   23.67   18.03
  -6 -23  14  120.59   12.40
  -6 -23  13   56.35   12.40
  -6 -23  12    4.51   11.27
  -6 -23  11   21.41   14.65
  -6 -23  10  251.33   15.78
  -6 -23   9  100.31   15.78
  -6 -23   8  -23.67   13.52
  -6 -23   7   46.21   11.27
  -6 -23   6  290.77   15.78
  -6 -23   5   86.78   13.52
  -6 -23   4   10.14   12.40
  -6 -23   3   23.67   15.78
  -6 -23   2  321.20   21.41
  -6 -23   1  146.51   15.78
   6  23   0   95.80   23.67
  -6 -23   0  101.43   14.65
   6  23   1   39.45   14.65
  -6 -23  -1   18.03   21.41
   6  23   2  260.34   25.92
  -6 -23  -2  314.44   31.56
   6  23   3  111.58   19.16
  -6 -23  -3  130.74   20.29
   6  23   4   68.75   23.67
  -6 -23  -4   47.34   18.03
   6  23   5   13.52   16.91
  -6 -23  -5   11.27   18.03
   6  23   6  238.93   30.43
  -6 -23  -6  213.01   24.79
   6  23   7  147.64   21.41
  -6 -23  -7  143.13   23.67
   6  23   8   76.64   27.05
  -6 -23  -8   61.99   25.92
   6  23   9    9.02   16.91
  -6 -23  -9   -9.02   24.79
  -6 -24  12  211.88   18.03
  -6 -24  11   -9.02   10.14
  -6 -24  10   -3.38   14.65
  -6 -24   9   -5.64   14.65
  -6 -24   8  211.88   16.91
  -6 -24   7   11.27   13.52
  -6 -24   6    5.64   12.40
  -6 -24   5   12.40   15.78
  -6 -24   4  227.66   18.03
  -6 -24   3    2.25   12.40
  -6 -24   2   23.67   15.78
  -6 -24   1   30.43   13.52
  -6 -24   0  297.54   18.03
   6  24   1   12.40   16.91
  -6 -24  -1   19.16   13.52
   6  24   2   49.59   18.03
  -6 -24  -2   55.22   23.67
   6  24   3   55.22   25.92
  -6 -24  -3   31.56   18.03
   6  24   4  203.99   28.18
  -6 -24  -4  258.09   25.92
   6  24   5   43.95   19.16
  -6 -24  -5   52.97   18.03
   6  24   6   76.64   24.79
  -6 -24  -6   60.86   19.16
   6  24   7  -25.92   18.03
  -6 -24  -7  -16.91   19.16
  -6 -25   9   19.16   11.27
  -6 -25   8   38.32   14.65
  -6 -25   7    3.38   12.40
  -6 -25   6  401.22   24.79
  -6 -25   5    5.64   23.67
  -6 -25   4    2.25   15.78
  -6 -25   3    1.13   13.52
  -6 -25   2  281.76   22.54
  -6 -25   1  -15.78   15.78
  -6 -25   0   18.03   12.40
  -6 -25  -1   11.27   11.27
   6  25   2  260.34   28.18
  -6 -25  -2  272.74   20.29
   6  25   3   18.03   22.54
  -6 -25  -3   12.40   25.92
   6  25   4  101.43   21.41
  -6 -25  -4   37.19   19.16
  -6 -26   5   47.34   23.67
  -6 -26   4  162.29   21.41
  -6 -26   3   -6.76   24.79
  -6 -26   2    9.02   16.91
  -6 -26   1   20.29   23.67
  -6 -26   0  219.77   31.56
   7   0 -26    3.38   12.40
   7   0 -25   67.62   50.72
   7   0 -24  -20.29   12.40
   7   0 -23  524.07   27.05
   7   0 -22   -5.64   11.27
   7   0 -21   -5.64   13.52
   7   0 -20  -15.78   10.14
   7   0 -19  781.03   32.68
   7   0 -18    0.00   11.27
   7   0 -17   10.14   11.27
   7   0 -16   -5.64    7.89
   7   0 -15 1184.51   45.08
   7   0 -14   -3.38   10.14
   7   0 -13  218.64   12.40
   7   0 -12   -1.13    6.76
   7   0 -11 1402.02   49.59
   7   0 -10    0.00    1.13
   7   0  -7  586.05   22.54
   7   0  -6    2.25    3.38
   7   0  -5  964.74   33.81
   7   0  -4   -3.38    4.51
   7   0  -3 1964.41   65.37
   7   0  -2    3.38    2.25
   7   0  -1 2186.44   73.26
   7   0   0    1.13    2.25
   7   0   1 1711.96   57.48
   7   0   2   10.14    2.25
   7   0  10    9.02    9.02
   7   0  11  605.21   33.81
   7   0  13  270.49   23.67
   7   0  14   15.78   12.40
   7   0  15  235.55   21.41
   7   0  18   11.27   12.40
   7   0  19  237.80   28.18
   7   0  20    2.25   19.16
   7   0  21  225.41   23.67
   7   1 -26    9.02   19.16
  -7  -1  26   42.83   14.65
   7   1 -25  223.15   20.29
  -7  -1  25  304.30   60.86
   7   1 -24   18.03   11.27
  -7  -1  24   49.59   16.91
   7   1 -23   46.21   18.03
  -7  -1  23   24.79   16.91
   7   1 -22   40.57   10.14
  -7  -1  22   39.45   11.27
   7   1 -21  624.37   29.30
  -7  -1  21  565.77   25.92
   7   1 -20  178.07   18.03
  -7  -1  20  184.83   14.65
   7   1 -19  147.64   14.65
  -7  -1  19  169.05   18.03
   7   1 -18    7.89    9.02
  -7  -1  18    4.51   12.40
   7   1 -17  466.59   24.79
  -7  -1  17  437.29   21.41
   7   1 -16  113.83   11.27
  -7  -1  16  143.13   11.27
   7   1 -15  130.74   13.52
  -7  -1  15  123.97   11.27
   7   1 -14   71.00    9.02
  -7  -1  14   78.89   11.27
   7   1 -13  915.15   36.06
  -7  -1  13  956.85   36.06
   7   1 -12  236.68   12.40
  -7  -1  12  224.28   13.52
   7   1 -11  222.02   13.52
   7   1 -10  146.51   10.14
  -7  -1  10  146.51   11.27
  -7  -1   9  770.89   29.30
  -7  -1   8  218.64   11.27
   7   1  -7  654.80   24.79
  -7  -1   7  670.58   25.92
   7   1  -6   18.03    3.38
   7   1  -5  125.10    9.02
   7   1  -4  307.68   13.52
   7   1  -3  475.61   18.03
   7   1  -2  604.09   21.41
   7   1  -1  836.26   29.30
   7   1   0  145.39    6.76
   7   1  10   18.03    9.02
  -7  -1 -10   13.52    9.02
   7   1  11  478.99   30.43
  -7  -1 -11  444.05   28.18
   7   1  13  516.18   30.43
  -7  -1 -13  582.67   34.94
   7   1  14   14.65   12.40
  -7  -1 -14   42.83   18.03
   7   1  15  297.54   23.67
  -7  -1 -15  306.55   30.43
   7   1  17  242.31   27.05
  -7  -1 -17  238.93   29.30
   7   1  18   29.30   19.16
  -7  -1 -18   23.67   14.65
   7   1  19  299.79   25.92
  -7  -1 -19  311.06   28.18
   7   1  20   63.11   16.91
  -7  -1 -20   59.73   16.91
   7   1  21  179.20   28.18
  -7  -1 -21  187.09   28.18
   7   2 -26   83.40   14.65
  -7  -2  26   98.05   16.91
   7   2 -25    4.51   12.40
  -7  -2  25  194.98   48.46
   7   2 -24  110.45   21.41
  -7  -2  24   73.26   14.65
   7   2 -23  219.77   18.03
  -7  -2  23  228.79   18.03
   7   2 -22  192.72   15.78
  -7  -2  22  209.63   22.54
   7   2 -21   25.92   14.65
  -7  -2  21   13.52   16.91
   7   2 -20  191.59   15.78
  -7  -2  20  200.61   18.03
   7   2 -19  510.54   66.49
  -7  -2  19  471.10   23.67
   7   2 -18  403.48   20.29
  -7  -2  18  415.87   22.54
   7   2 -17  128.48   14.65
  -7  -2  17  128.48   12.40
   7   2 -16   98.05   10.14
  -7  -2  16   95.80   11.27
   7   2 -15  474.48   21.41
  -7  -2  15  424.89   20.29
   7   2 -14  368.54   18.03
  -7  -2  14  402.35   20.29
   7   2 -13   12.40   10.14
  -7  -2  13   19.16    9.02
   7   2 -12  194.98   12.40
  -7  -2  12  232.17    9.02
   7   2 -11  738.20   28.18
  -7  -2  11  785.54   21.41
   7   2 -10  675.09   19.16
  -7  -2  10  685.23   27.05
   7   2  -9  382.06   18.03
  -7  -2   9  417.00   18.03
   7   2  -8   65.37    7.89
  -7  -2   8   65.37    6.76
   7   2  -7  321.20   13.52
   7   2  -6 1007.56   34.94
   7   2  -5  276.12   13.52
   7   2  -4  694.25   27.05
   7   2  -3  271.61   11.27
   7   2  -2 1709.70   58.61
   7   2  -1  309.93   12.40
  -7  -2  -5  121.72    5.64
  -7  -2  -6  581.55   20.29
  -7  -2  -7  335.85   12.40
   7   2  10  657.06   33.81
  -7  -2 -10  642.41   34.94
   7   2  11  315.57   23.67
  -7  -2 -11  321.20   23.67
   7   2  12  -66.49   51.84
   7   2  13  370.79   25.92
  -7  -2 -13  361.78   25.92
   7   2  14  184.83   19.16
  -7  -2 -14  172.44   20.29
   7   2  15  218.64   24.79
  -7  -2 -15  201.74   20.29
   7   2  16    3.38   11.27
   7   2  17  235.55   28.18
  -7  -2 -17  209.63   23.67
   7   2  18  285.14   24.79
  -7  -2 -18  245.69   25.92
   7   2  19  118.34   22.54
  -7  -2 -19   95.80   22.54
   7   2  20   24.79   20.29
  -7  -2 -20   28.18   22.54
   7   2  21   85.65   19.16
  -7  -2 -21   90.16   23.67
  -7  -3  25  220.90   50.72
   7   3 -24  209.63   20.29
  -7  -3  24  165.67   16.91
   7   3 -23   -2.25   16.91
  -7  -3  23   10.14   11.27
   7   3 -22  181.45   14.65
  -7  -3  22  163.42   14.65
   7   3 -21   30.43   11.27
  -7  -3  21   22.54   11.27
   7   3 -20  605.21   29.30
  -7  -3  20  620.99   28.18
   7   3 -19   21.41   32.68
  -7  -3  19   -2.25   10.14
   7   3 -18  167.93   16.91
  -7  -3  18  167.93   12.40
   7   3 -17   54.10   10.14
  -7  -3  17   55.22   10.14
   7   3 -16  482.37   22.54
  -7  -3  16  524.07   25.92
   7   3 -15   54.10   11.27
  -7  -3  15   55.22    3.38
   7   3 -14  349.38   16.91
  -7  -3  14  343.74   19.16
   7   3 -13   28.18    7.89
  -7  -3  13   31.56    3.38
   7   3 -12  953.47   36.06
  -7  -3  12  966.99   38.32
   7   3 -11  102.56   10.14
  -7  -3  11  108.19    5.64
   7   3 -10  424.89   13.52
  -7  -3  10  421.51   25.92
   7   3  -9   24.79    7.89
  -7  -3   9   23.67    7.89
   7   3  -8  868.94   22.54
  -7  -3   8  868.94   39.45
   7   3  -7  158.91   10.14
  -7  -3   7  179.20   16.91
   7   3  -6  208.50   10.14
  -7  -3   6  225.41   13.52
   7   3  -5  252.45   11.27
  -7  -3   5  258.09   14.65
   7   3  -4 1743.51   58.61
  -7  -3   4 1831.42   69.88
   7   3  -3  256.96   10.14
  -7  -3   3  254.71   12.40
  -7  -3   2  829.49   33.81
  -7  -3   1  192.72   10.14
  -7  -3  -6  163.42    7.89
  -7  -3  -7  146.51    6.76
  -7  -3  -8 1123.65   39.45
   7   3   9  297.54   20.29
  -7  -3  -9  338.11   14.65
   7   3  10    1.13    9.02
  -7  -3 -10    3.38    3.38
   7   3  11   24.79   13.52
  -7  -3 -11   39.45   11.27
   7   3  12  752.86   39.45
   7   3  13   48.46   13.52
  -7  -3 -13   61.99   14.65
   7   3  14    2.25   16.91
  -7  -3 -14    0.00   11.27
   7   3  15   21.41   13.52
  -7  -3 -15   46.21   15.78
  -7  -3 -16  601.83   40.57
   7   3  17  136.37   20.29
  -7  -3 -17   68.75   23.67
   7   3  18   18.03   18.03
  -7  -3 -18  -11.27   11.27
   7   3  19   36.06   20.29
  -7  -3 -19   30.43   14.65
   7   3  20  350.51   29.30
  -7  -3 -20  339.24   31.56
   7   3  21   45.08   23.67
  -7  -3 -21   13.52   16.91
  -7  -4  25   76.64   51.84
  -7  -4  24  154.40   21.41
  -7  -4  23   13.52   16.91
   7   4 -22  385.44   22.54
  -7  -4  22  417.00   29.30
   7   4 -21    7.89   10.14
  -7  -4  21   13.52   15.78
   7   4 -20  394.46   23.67
  -7  -4  20  467.72   27.05
   7   4 -19   89.04   34.94
  -7  -4  19    9.02    2.25
   7   4 -18  643.53   31.56
  -7  -4  18  619.87   15.78
   7   4 -17   -1.13    9.02
  -7  -4  17    3.38    3.38
   7   4 -16  232.17   15.78
  -7  -4  16  249.07   10.14
   7   4 -15    5.64   11.27
  -7  -4  15   16.91    3.38
   7   4 -14  530.83   24.79
  -7  -4  14  528.58   15.78
   7   4 -13   -1.13    6.76
  -7  -4  13   -1.13    2.25
   7   4 -12  788.92   31.56
  -7  -4  12  804.70   24.79
   7   4 -11   -2.25    6.76
  -7  -4  11   -3.38    2.25
   7   4 -10 1500.08   39.45
  -7  -4  10 1531.63   33.81
   7   4  -9    6.76    6.76
  -7  -4   9   16.91    4.51
   7   4  -8  112.70    5.64
  -7  -4   8  117.21    9.02
   7   4  -7   95.80    5.64
  -7  -4   7   91.29    7.89
   7   4  -6 1829.17   64.24
  -7  -4   6 1939.62   69.88
  -7  -4   5   10.14    5.64
  -7  -4   4  217.52   10.14
  -7  -4   3   73.26    5.64
  -7  -4   2 1844.95   63.11
  -7  -4   1   86.78    5.64
  -7  -4   0   48.46    3.38
  -7  -4  -1   82.27    4.51
  -7  -4  -2 2563.99   85.65
  -7  -4  -3   48.46    2.25
  -7  -4  -7   72.13    4.51
  -7  -4  -8   41.70    4.51
   7   4   9   -3.38    7.89
  -7  -4  -9   -1.13    3.38
   7   4  10 1303.97   52.97
  -7  -4 -10 1393.01   38.32
   7   4  11  -10.14   13.52
  -7  -4 -11    5.64    3.38
   7   4  12   24.79   11.27
  -7  -4 -12    6.76    5.64
   7   4  13   14.65   18.03
  -7  -4 -13    1.13   14.65
   7   4  14  618.74   36.06
  -7  -4 -14  679.60   42.83
  -7  -4 -15   24.79   19.16
   7   4  16    3.38   16.91
  -7  -4 -16   -7.89   10.14
   7   4  17   20.29   13.52
  -7  -4 -17  -16.91   11.27
   7   4  18  639.03   42.83
  -7  -4 -18  575.91   41.70
   7   4  19    5.64   12.40
  -7  -4 -19  -14.65   19.16
   7   4  20   34.94   21.41
  -7  -4 -20 -135.24   52.97
   7   4  21   -1.13   14.65
  -7  -4 -21  -24.79   22.54
  -7  -5  26  135.24   18.03
  -7  -5  25   61.99   13.52
  -7  -5  24  199.48   20.29
  -7  -5  23  -11.27   13.52
  -7  -5  22  162.29   19.16
  -7  -5  21  104.81    6.76
  -7  -5  20  422.64   12.40
  -7  -5  19   -6.76    3.38
   7   5 -18  170.18   14.65
  -7  -5  18  170.18    9.02
   7   5 -17   32.68    9.02
  -7  -5  17   29.30    4.51
   7   5 -16  233.29   14.65
  -7  -5  16  231.04    7.89
   7   5 -15   -6.76   10.14
  -7  -5  15    2.25    2.25
   7   5 -14  206.25   14.65
  -7  -5  14  216.39    6.76
   7   5 -13  102.56   11.27
  -7  -5  13  101.43    4.51
   7   5 -12  948.96   38.32
  -7  -5  12  939.94   25.92
   7   5 -11   -2.25    6.76
  -7  -5  11    6.76    1.13
   7   5 -10  171.31    7.89
  -7  -5  10  171.31    6.76
  -7  -5   9  188.21    6.76
   7   5  -8 1040.25   39.45
  -7  -5   8 1033.49   39.45
   7   5  -7   31.56    4.51
  -7  -5   7   25.92    5.64
  -7  -5   6  446.30   19.16
   7   5  -5  744.97   31.56
  -7  -5   5  689.74   27.05
  -7  -5   4 1734.50   60.86
  -7  -5   3   55.22    5.64
  -7  -5   2  227.66   10.14
  -7  -5   1  153.28    7.89
  -7  -5   0 1394.13   48.46
  -7  -5  -1    2.25    2.25
  -7  -5  -2  166.80    6.76
  -7  -5  -3  118.34    5.64
  -7  -5  -4 1058.28   36.06
  -7  -5  -6  242.31    9.02
   7   5   8 1056.03   47.34
  -7  -5  -8 1070.68   29.30
   7   5   9   38.32   10.14
  -7  -5  -9   25.92    2.25
   7   5  10    5.64   16.91
  -7  -5 -10   14.65    2.25
   7   5  11   28.18   15.78
  -7  -5 -11   24.79    2.25
   7   5  12 1085.33   46.21
  -7  -5 -12 1081.95   33.81
   7   5  13   87.91   20.29
  -7  -5 -13  107.07    7.89
   7   5  14   11.27   11.27
  -7  -5 -14    1.13    4.51
   7   5  16  561.26   40.57
   7   5  17   -4.51   16.91
  -7  -5 -17  -10.14   16.91
   7   5  18   12.40   11.27
  -7  -5 -18   -2.25   18.03
   7   5  19   58.61   20.29
  -7  -5 -19   64.24   19.16
   7   5  20  410.24   32.68
  -7  -5 -20  -67.62   39.45
   7   5  21   55.22   16.91
  -7  -5 -21   84.53   19.16
  -7  -6  25    3.38   12.40
  -7  -6  24   92.42   16.91
  -7  -6  23  220.90   18.03
  -7  -6  22  122.85   13.52
  -7  -6  21   13.52    5.64
  -7  -6  20   99.18    5.64
  -7  -6  19  343.74   10.14
  -7  -6  18  228.79    9.02
  -7  -6  17   72.13    5.64
  -7  -6  16   78.89    4.51
  -7  -6  15  193.85    7.89
  -7  -6  14  311.06   10.14
  -7  -6  13    6.76    3.38
  -7  -6  12  324.58    7.89
  -7  -6  11 1006.44   20.29
   7   6 -10  634.52   25.92
  -7  -6  10  639.03   15.78
  -7  -6   9  191.59    7.89
  -7  -6   8  315.57   15.78
   7   6  -7  335.85   16.91
  -7  -6   7  332.47   15.78
  -7  -6   6  847.53   32.68
  -7  -6   5  193.85   10.14
  -7  -6   4   77.76    6.76
  -7  -6   3  615.36   23.67
  -7  -6   2 1290.45   34.94
  -7  -6   1  364.03   12.40
  -7  -6   0   71.00    4.51
   7   6   1  546.61   28.18
  -7  -6  -1  572.53   22.54
   7   6   6  630.01   43.95
   7   6   7  235.55   20.29
   7   6   8   11.27    9.02
  -7  -6  -8   -2.25    2.25
   7   6   9  324.58   22.54
  -7  -6  -9  351.63    9.02
   7   6  10  830.62   41.70
  -7  -6 -10  862.18   19.16
   7   6  11  208.50   22.54
  -7  -6 -11  201.74    6.76
   7   6  12   -3.38   11.27
  -7  -6 -12   10.14    2.25
   7   6  13  224.28   22.54
  -7  -6 -13  192.72    6.76
   7   6  14  371.92   30.43
  -7  -6 -14  424.89   12.40
  -7  -6 -15   84.53    4.51
   7   6  16  -10.14   11.27
  -7  -6 -16  -22.54   12.40
   7   6  17  142.01   23.67
  -7  -6 -17   93.54   18.03
   7   6  18  359.52   31.56
  -7  -6 -18  315.57   28.18
   7   6  19   66.49   18.03
  -7  -6 -19   72.13   18.03
   7   6  20   -1.13   14.65
  -7  -6 -20  -40.57   22.54
   7   6  21  128.48   25.92
  -7  -6 -21   41.70   18.03
  -7  -7  25  262.60   22.54
  -7  -7  24  165.67   50.72
  -7  -7  23   25.92   12.40
  -7  -7  22   14.65   12.40
  -7  -7  21  609.72   21.41
  -7  -7  20   29.30    5.64
  -7  -7  19  109.32    6.76
  -7  -7  18   87.91    5.64
  -7  -7  17  527.45   15.78
  -7  -7  16  169.05    7.89
  -7  -7  15   22.54    4.51
  -7  -7  14   86.78    6.76
  -7  -7  13  963.61   20.29
  -7  -7  12  132.99    4.51
  -7  -7  11  297.54    7.89
  -7  -7  10  170.18    7.89
  -7  -7   9 1254.38   29.30
   7   7  -8  113.83    6.76
  -7  -7   8  111.58   10.14
   7   7  -7  352.76   15.78
  -7  -7   7  360.65   15.78
   7   7  -6  103.69   11.27
  -7  -7   6  104.81    7.89
  -7  -7   5  985.02   34.94
  -7  -7   4  333.60   15.78
  -7  -7   3   94.67    7.89
  -7  -7   2    4.51    3.38
   7   7  -1 1626.30   67.62
  -7  -7   1 1649.97   46.21
   7   7   0  259.22   18.03
  -7  -7   0  235.55   18.03
   7   7   1  777.65   38.32
   7   7   2  111.58   12.40
   7   7   3  427.14   24.79
   7   7   4  888.10   40.57
  -7  -7  -4  890.35   45.08
   7   7   5  143.13   16.91
  -7  -7  -5  117.21   16.91
   7   7   6   14.65    7.89
  -7  -7  -6   15.78    7.89
   7   7   7  758.49   37.19
  -7  -7  -7  777.65   38.32
   7   7   8   58.61   12.40
  -7  -7  -8   89.04   15.78
   7   7   9  307.68   22.54
  -7  -7  -9  309.93   12.40
   7   7  10   51.84   14.65
  -7  -7 -10   47.34    3.38
   7   7  11  463.21   31.56
  -7  -7 -11  501.53   12.40
   7   7  12  205.12   20.29
  -7  -7 -12  232.17    6.76
   7   7  13  263.72   22.54
  -7  -7 -13  233.29    6.76
  -7  -7 -14   -2.25    3.38
  -7  -7 -15  254.71    9.02
   7   7  16  127.35   19.16
  -7  -7 -16  104.81    5.64
   7   7  17  175.82   22.54
  -7  -7 -17  166.80   24.79
   7   7  18   27.05   19.16
  -7  -7 -18   -7.89   18.03
   7   7  19  163.42   21.41
  -7  -7 -19  175.82   28.18
   7   7  20   57.48   22.54
  -7  -7 -20   43.95   25.92
   7   7  21  160.04   21.41
  -7  -8  25   42.83   13.52
  -7  -8  24  118.34   51.84
  -7  -8  23  321.20   27.05
  -7  -8  22  -24.79   16.91
  -7  -8  21   29.30    9.02
  -7  -8  20   -2.25    5.64
  -7  -8  19  765.25   20.29
  -7  -8  18   -1.13    4.51
  -7  -8  17   87.91    6.76
  -7  -8  16    0.00    4.51
  -7  -8  15  589.44   13.52
  -7  -8  14   57.48    3.38
  -7  -8  13  237.80    6.76
  -7  -8  12    1.13    2.25
  -7  -8  11 1067.30   23.67
  -7  -8  10    1.13    3.38
  -7  -8   9  427.14   11.27
   7   8  -8   38.32    6.76
  -7  -8   8   37.19    4.51
   7   8  -7 1352.43   40.57
  -7  -8   7 1363.70   48.46
   7   8  -6   -4.51    3.38
  -7  -8   6    0.00    4.51
  -7  -8   5  457.57   20.29
  -7  -8   4   15.78    4.51
   7   8  -3  822.73   96.92
  -7  -8   3  915.15   28.18
  -7  -8   2   14.65    4.51
   7   8  -1  427.14   24.79
  -7  -8   1  397.84   22.54
   7   8   0   14.65    5.64
  -7  -8   0   16.91    7.89
   7   8   1 1604.89   66.49
  -7  -8  -1 1606.02   61.99
   7   8   2   19.16    7.89
  -7  -8  -2   18.03   10.14
   7   8   3  302.04   22.54
  -7  -8  -3  339.24   23.67
   7   8   4   34.94    9.02
  -7  -8  -4   24.79   16.91
   7   8   5  873.45   40.57
  -7  -8  -5  840.76   41.70
   7   8   6  118.34   16.91
  -7  -8  -6   80.02   13.52
   7   8   7  402.35   25.92
  -7  -8  -7  436.16   29.30
   7   8   8    4.51    9.02
  -7  -8  -8  -13.52    9.02
   7   8   9  552.24   32.68
  -7  -8  -9  540.97   29.30
   7   8  10   11.27   11.27
  -7  -8 -10   -1.13    5.64
   7   8  11  387.70   28.18
  -7  -8 -11  371.92   11.27
   7   8  12   -2.25   15.78
  -7  -8 -12   20.29    6.76
   7   8  13  340.36   65.37
  -7  -8 -13  432.78   11.27
  -7  -8 -14   10.14    4.51
  -7  -8 -15  295.28   10.14
   7   8  16    0.00   15.78
  -7  -8 -16    3.38    3.38
   7   8  17  234.42   25.92
  -7  -8 -17  209.63   28.18
   7   8  18   23.67   15.78
  -7  -8 -18  -29.30   19.16
   7   8  19  382.06   34.94
  -7  -8 -19  336.98   34.94
   7   8  20   15.78   14.65
  -7  -8 -20  -31.56   21.41
  -7  -9  25  224.28   20.29
  -7  -9  24   18.03   13.52
  -7  -9  23   37.19   21.41
  -7  -9  21  340.36   18.03
  -7  -9  20   32.68    7.89
  -7  -9  19   16.91    5.64
  -7  -9  18   14.65    5.64
  -7  -9  17  852.03   23.67
  -7  -9  16   22.54    6.76
  -7  -9  15   67.62    4.51
  -7  -9  14   56.35    3.38
  -7  -9  13 1004.18   18.03
  -7  -9  12  181.45    6.76
  -7  -9  11  118.34    5.64
  -7  -9  10    4.51    3.38
  -7  -9   9 1310.73   30.43
   7   9  -8  131.86   11.27
  -7  -9   8  131.86    5.64
   7   9  -7  299.79   12.40
  -7  -9   7  293.03   14.65
   7   9  -6    0.00    3.38
  -7  -9   6    0.00    3.38
   7   9  -5 1225.08   52.97
  -7  -9   5 1288.19   37.19
   7   9  -4  143.13   29.30
  -7  -9   4  137.50    6.76
   7   9  -3  394.46   21.41
  -7  -9   3  397.84   13.52
   7   9  -2    2.25    7.89
  -7  -9   2   -6.76    9.02
   7   9  -1  872.32   37.19
  -7  -9   1  898.24   39.45
   7   9   0  327.97   21.41
  -7  -9   0  300.92   20.29
   7   9   1  464.34   30.43
  -7  -9  -1  454.19   25.92
   7   9   2   40.57   12.40
  -7  -9  -2   45.08    9.02
   7   9   3  914.02   42.83
  -7  -9  -3  871.19   61.99
   7   9   4   58.61   13.52
  -7  -9  -4   38.32   10.14
   7   9   5  448.56   25.92
  -7  -9  -5  419.25   27.05
   7   9   6   10.14   12.40
  -7  -9  -6   14.65   13.52
   7   9   7  533.08   32.68
  -7  -9  -7  547.74   31.56
   7   9   8   77.76   13.52
  -7  -9  -8   45.08   19.16
   7   9   9  320.08   22.54
  -7  -9  -9  307.68   24.79
   7   9  10   16.91   13.52
  -7  -9 -10   21.41   11.27
   7   9  11  376.43   27.05
  -7  -9 -11  360.65   15.78
   7   9  12  118.34   20.29
  -7  -9 -12  114.96    5.64
   7   9  13  228.79   22.54
  -7  -9 -13  265.98    9.02
   7   9  14   12.40   11.27
  -7  -9 -14   -1.13    3.38
   7   9  15  298.66   27.05
  -7  -9 -15  277.25    9.02
   7   9  16   33.81   13.52
  -7  -9 -16   38.32    6.76
   7   9  17  279.50   30.43
  -7  -9 -17  294.15   31.56
   7   9  18   10.14   20.29
  -7  -9 -18   25.92   21.41
   7   9  19  123.97   22.54
  -7  -9 -19  151.02   28.18
   7   9  20   24.79   23.67
  -7  -9 -20  -21.41   22.54
  -7 -10  24   29.30   15.78
  -7 -10  23  165.67   21.41
  -7 -10  21    4.51    7.89
  -7 -10  20   40.57    7.89
  -7 -10  19  202.87   10.14
  -7 -10  18  339.24    7.89
  -7 -10  17   48.46    3.38
  -7 -10  16    7.89    3.38
  -7 -10  15  474.48   10.14
  -7 -10  14  232.17    6.76
  -7 -10  13  164.55    5.64
  -7 -10  12  101.43    4.51
  -7 -10  11  578.17   12.40
  -7 -10  10  519.56   13.52
   7  10  -9   51.84    9.02
  -7 -10   9   48.46    7.89
  -7 -10   8   -6.76    5.64
   7  10  -7  557.88   27.05
  -7 -10   7  579.29   13.52
   7  10  -6  313.31   16.91
  -7 -10   6  320.08   10.14
   7  10  -5  247.95   16.91
  -7 -10   5  270.49   10.14
   7  10  -4    5.64    6.76
  -7 -10   4    2.25    4.51
   7  10  -3  395.59   20.29
  -7 -10   3  362.90   20.29
   7  10  -2  302.04   18.03
  -7 -10   2  286.27   18.03
   7  10  -1  174.69   13.52
  -7 -10   1  190.47   18.03
   7  10   0   37.19    7.89
  -7 -10   0   38.32   10.14
   7  10   1  300.92   20.29
  -7 -10  -1  322.33   21.41
[truncated: 339,622 more chars]
