# Supplementary material for: Elucidating bonding preferences in tetrakis(imido)uranate(VI) dianions
Source: Springer Nature journal article supplement (doi:10.1038/nchem.2767), 2017-04-24
Supplement: 41557_2017_BFnchem2767_MOESM33_ESM.mol [file 41557_2017_BFnchem2767_MOESM33_ESM.mol]

nchem.2767-comp2Cs.mol
  ChemDraw04061711512D

 55 56  0  0  0  0  0  0  0  0999 V2000
    4.3885   -2.9415    0.0000 Cs  0  3  0  0  0  0  0  0  0  0  0  0
    5.2107   -2.9415    0.0000 Cs  0  3  0  0  0  0  0  0  0  0  0  0
   -2.8632   -1.7329    0.0000 C   0  0  0  0  0  0  0  0  0  0  0  0
   -2.8632   -0.9079    0.0000 C   0  0  0  0  0  0  0  0  0  0  0  0
   -2.1488   -0.4954    0.0000 C   0  0  0  0  0  0  0  0  0  0  0  0
   -3.5777   -0.4954    0.0000 C   0  0  0  0  0  0  0  0  0  0  0  0
   -4.2922   -0.9079    0.0000 C   0  0  0  0  0  0  0  0  0  0  0  0
   -5.0066   -0.4954    0.0000 C   0  0  0  0  0  0  0  0  0  0  0  0
   -5.0066    0.3296    0.0000 C   0  0  0  0  0  0  0  0  0  0  0  0
   -4.2922    0.7421    0.0000 C   0  0  0  0  0  0  0  0  0  0  0  0
   -4.4354    1.5545    0.0000 C   0  0  0  0  0  0  0  0  0  0  0  0
   -3.8035    2.0848    0.0000 C   0  0  0  0  0  0  0  0  0  0  0  0
   -5.2107    1.8367    0.0000 C   0  0  0  0  0  0  0  0  0  0  0  0
   -3.5777    0.3296    0.0000 C   0  0  0  0  0  0  0  0  0  0  0  0
   -2.3373    0.7810    0.0000 N   0  0  0  0  0  0  0  0  0  0  0  0
   -1.0227    0.0220    0.0000 U   0  6  0  0  0  0  0  0  0  0  0  0
   -0.1399    1.5510    0.0000 N   0  0  0  0  0  0  0  0  0  0  0  0
   -0.5068    2.5588    0.0000 C   0  0  0  0  0  0  0  0  0  0  0  0
   -1.2820    2.8410    0.0000 C   0  0  0  0  0  0  0  0  0  0  0  0
   -1.9965    2.4285    0.0000 C   0  0  0  0  0  0  0  0  0  0  0  0
   -1.9965    1.6035    0.0000 C   0  0  0  0  0  0  0  0  0  0  0  0
   -2.7109    2.8410    0.0000 C   0  0  0  0  0  0  0  0  0  0  0  0
   -1.4253    3.6534    0.0000 C   0  0  0  0  0  0  0  0  0  0  0  0
   -0.7933    4.1837    0.0000 C   0  0  0  0  0  0  0  0  0  0  0  0
   -0.0180    3.9016    0.0000 C   0  0  0  0  0  0  0  0  0  0  0  0
    0.1252    3.0891    0.0000 C   0  0  0  0  0  0  0  0  0  0  0  0
    0.9005    2.8069    0.0000 C   0  0  0  0  0  0  0  0  0  0  0  0
    1.5325    3.3372    0.0000 C   0  0  0  0  0  0  0  0  0  0  0  0
    1.0437    1.9945    0.0000 C   0  0  0  0  0  0  0  0  0  0  0  0
    0.7206   -0.9845    0.0000 N   0  0  0  0  0  0  0  0  0  0  0  0
    1.4959   -0.7023    0.0000 C   0  0  0  0  0  0  0  0  0  0  0  0
    1.6391    0.1102    0.0000 C   0  0  0  0  0  0  0  0  0  0  0  0
    1.0071    0.6405    0.0000 C   0  0  0  0  0  0  0  0  0  0  0  0
    1.1504    1.4529    0.0000 C   0  0  0  0  0  0  0  0  0  0  0  0
    0.2319    0.3583    0.0000 C   0  0  0  0  0  0  0  0  0  0  0  0
    2.4144    0.3923    0.0000 C   0  0  0  0  0  0  0  0  0  0  0  0
    3.0464   -0.1380    0.0000 C   0  0  0  0  0  0  0  0  0  0  0  0
    2.9031   -0.9504    0.0000 C   0  0  0  0  0  0  0  0  0  0  0  0
    2.1279   -1.2326    0.0000 C   0  0  0  0  0  0  0  0  0  0  0  0
    1.9846   -2.0451    0.0000 C   0  0  0  0  0  0  0  0  0  0  0  0
    1.2093   -2.3272    0.0000 C   0  0  0  0  0  0  0  0  0  0  0  0
    2.6166   -2.5754    0.0000 C   0  0  0  0  0  0  0  0  0  0  0  0
   -2.0292   -1.7213    0.0000 N   0  0  0  0  0  0  0  0  0  0  0  0
   -1.8859   -2.5337    0.0000 C   0  0  0  0  0  0  0  0  0  0  0  0
   -2.6004   -2.9462    0.0000 C   0  0  0  0  0  0  0  0  0  0  0  0
   -3.3149   -2.5337    0.0000 C   0  0  0  0  0  0  0  0  0  0  0  0
   -3.3149   -1.7087    0.0000 C   0  0  0  0  0  0  0  0  0  0  0  0
   -4.0293   -2.9462    0.0000 C   0  0  0  0  0  0  0  0  0  0  0  0
   -2.6004   -3.7712    0.0000 C   0  0  0  0  0  0  0  0  0  0  0  0
   -1.8859   -4.1837    0.0000 C   0  0  0  0  0  0  0  0  0  0  0  0
   -1.1715   -3.7712    0.0000 C   0  0  0  0  0  0  0  0  0  0  0  0
   -1.1715   -2.9462    0.0000 C   0  0  0  0  0  0  0  0  0  0  0  0
   -0.4570   -2.5337    0.0000 C   0  0  0  0  0  0  0  0  0  0  0  0
   -0.4570   -1.7087    0.0000 C   0  0  0  0  0  0  0  0  0  0  0  0
    0.2575   -2.9462    0.0000 C   0  0  0  0  0  0  0  0  0  0  0  0
  3  4  1  0      
  4  5  1  0      
  4  6  1  0      
  6  7  1  0      
  7  8  2  0      
  8  9  1  0      
  9 10  2  0      
 10 11  1  0      
 11 12  1  0      
 11 13  1  0      
  6 14  2  0      
 10 14  1  0      
 14 15  1  0      
 15 16  2  0      
 16 17  2  0      
 17 18  1  0      
 18 19  2  0      
 19 20  1  0      
 20 21  1  0      
 20 22  1  0      
 19 23  1  0      
 23 24  2  0      
 24 25  1  0      
 25 26  2  0      
 18 26  1  0      
 26 27  1  0      
 27 28  1  0      
 27 29  1  0      
 16 30  2  0      
 30 31  1  0      
 31 32  2  0      
 32 33  1  0      
 33 34  1  0      
 33 35  1  0      
 32 36  1  0      
 36 37  2  0      
 37 38  1  0      
 38 39  2  0      
 31 39  1  0      
 39 40  1  0      
 40 41  1  0      
 40 42  1  0      
 16 43  2  0      
 43 44  1  0      
 44 45  2  0      
 45 46  1  0      
 46 47  1  0      
 46 48  1  0      
 45 49  1  0      
 49 50  2  0      
 50 51  1  0      
 51 52  2  0      
 44 52  1  0      
 52 53  1  0      
 53 54  1  0      
 53 55  1  0      
M  CHG  3   1   1   2   1  16  -2
M  STY  1   1 SUP
M  SLB  1   1   1
M  SAL   1  2   1   2
M  SMT   1 [Cs\S^+\n]2
M  END
