# Supplementary material for: Elucidating bonding preferences in tetrakis(imido)uranate(VI) dianions
Source: Springer Nature journal article supplement (doi:10.1038/nchem.2767), 2017-04-24
Supplement: 41557_2017_BFnchem2767_MOESM38_ESM.cif [file 41557_2017_BFnchem2767_MOESM38_ESM.cif]

data_global

_publ_contact_author_name     'Zeller, Matthias'
_publ_contact_author_address
;       Department of Chemistry
        Purdue University
        560 Oval Dr.
        W. Lafayette
        IN 47907-2084
        USA
;
_publ_contact_author_email      'zeller4@purdue.edu'
_publ_contact_author_fax        '1(765)4940239'
_publ_contact_author_phone      '1(765)4944572'


# The loop structure below should contain the names and addresses and footnotes
# of all authors, in the relevant order of publication. Repeat as necessary

loop_
_publ_author_name
_publ_author_address
_publ_author_footnote

        'Zeller, Matthias'
;       Department of Chemistry
        Purdue University
        560 Oval Dr.
        W. Lafayette
        IN 47907-2084
        USA
;
;
?
; 

        'Nickolas H. Anderson'
;       Department of Chemistry
        Purdue University
        560 Oval Dr.
        W. Lafayette
        IN 47907-2084
        USA
;
;
?
;

        'Suzanne C. Bart'
;       Department of Chemistry
        Purdue University
        560 Oval Dr.
        W. Lafayette
        IN 47907-2084
        USA
;
;
?
;

_publ_section_references
;
Allen, F. H., Johnson, O., Shields, G. P., Smith, B. R., Towler, M. (2004). 
J. Appl. Cryst., 37, 335--338.

H�bschle, C. B., Sheldrick, G. M. and Dittrich, B. (2011). J. Appl. Cryst., 
44, 1281--1284.

Nonius (1998). Collect Users Manual, Nonius Delft, The Netherlands.

Otwinowski Z. & Minor, W. (1997). Methods Enzymol., 276, 307--327.

Prince, E. and Nicholson, W. L. (1983). Acta Cryst., A39, 407--410.

Rigaku Corp. (2001). CrystalClear, The Woodlands, Texas, USA.

Sheldrick, G.M. (2008). Acta Cryst., A64, 112--122.

Sheldrick, G. M. (2013). SHELXL2013. University of G\"ottingen, Germany.

Spek, A. L. (2003). J. Appl. Cryst., 36, 7--13.

CSD: Groom, C. R. & Allen, F. H. (2014). Angew. Chem. Int. Ed., 53, 662--671.

Publcif: Westrip, S. P. (2010). J. Appl. Cryst., 43, 920-�925.
;
 
data_nha-k2cryptUNR4
 
_audit_creation_method            'SHELXL-2014/7'
_shelx_SHELXL_version_number      '2014/7'
_chemical_name_systematic         ?
_chemical_name_common             ?
_chemical_melting_point           ?
_chemical_formula_moiety          'C48 H68 N4 U, 2(C18 H36 K N2 O6), C4 H8 O'
_chemical_formula_sum
 'C88 H148 K2 N8 O13 U' 
_chemical_formula_weight          1842.37

loop_
 _atom_type_symbol
 _atom_type_description
 _atom_type_scat_dispersion_real
 _atom_type_scat_dispersion_imag
 _atom_type_scat_source
 'C'  'C'   0.0033   0.0016
 'International Tables Vol C Tables 4.2.6.8 and 6.1.1.4'
 'H'  'H'   0.0000   0.0000
 'International Tables Vol C Tables 4.2.6.8 and 6.1.1.4'
 'K'  'K'   0.2009   0.2494
 'International Tables Vol C Tables 4.2.6.8 and 6.1.1.4'
 'N'  'N'   0.0061   0.0033
 'International Tables Vol C Tables 4.2.6.8 and 6.1.1.4'
 'O'  'O'   0.0106   0.0060
 'International Tables Vol C Tables 4.2.6.8 and 6.1.1.4'
 'U'  'U'  -9.6767   9.6646
 'International Tables Vol C Tables 4.2.6.8 and 6.1.1.4'
 
_space_group_crystal_system       monoclinic
_space_group_IT_number            15
_space_group_name_H-M_alt         'C 2/c'
_space_group_name_Hall            '-C 2yc'
 
_shelx_space_group_comment
;
The symmetry employed for this shelxl refinement is uniquely defined
by the following loop, which should always be used as a source of
symmetry information in preference to the above space-group names.
They are only intended as comments.
;
 
loop_
 _space_group_symop_operation_xyz
 'x, y, z'
 '-x, y, -z+1/2'
 'x+1/2, y+1/2, z'
 '-x+1/2, y+1/2, -z+1/2'
 '-x, -y, -z'
 'x, -y, z-1/2'
 '-x+1/2, -y+1/2, -z'
 'x+1/2, -y+1/2, z-1/2'
 
_cell_length_a                    19.943(4)
_cell_length_b                    19.348(4)
_cell_length_c                    25.956(5)
_cell_angle_alpha                 90
_cell_angle_beta                  111.50(3)
_cell_angle_gamma                 90
_cell_volume                      9318(4)
_cell_formula_units_Z             4
_cell_measurement_temperature     100(2)
_cell_measurement_reflns_used     42111
_cell_measurement_theta_min       1.521
_cell_measurement_theta_max       30.734
 
_exptl_crystal_description        plate
_exptl_crystal_colour             black
_exptl_crystal_density_meas       ?
_exptl_crystal_density_method     ?
_exptl_crystal_density_diffrn     1.313          
_exptl_crystal_F_000              3864
_exptl_transmission_factor_min    ?
_exptl_transmission_factor_max    ?
_exptl_crystal_size_max           0.250
_exptl_crystal_size_mid           0.250
_exptl_crystal_size_min           0.100
_exptl_absorpt_coefficient_mu     1.892
_shelx_estimated_absorpt_T_min    0.649
_shelx_estimated_absorpt_T_max    0.833
_exptl_absorpt_correction_type    'multi-scan'
_exptl_absorpt_correction_T_min   0.553 
_exptl_absorpt_correction_T_max   0.833 
_exptl_absorpt_process_details    'SCALEPACK (Otwinowski & Minor, 1997)'
_exptl_absorpt_special_details    ?
_diffrn_ambient_temperature       100(2)
_diffrn_radiation_wavelength      0.71073
_diffrn_radiation_type            MoK\a
_diffrn_source                    'fine focus X-ray tube'
_diffrn_radiation_monochromator   'graphite'
_diffrn_measurement_device_type   'Nonius Kappa CCD diffractometer'
_diffrn_measurement_method        '\w and \f scans'
_diffrn_detector_area_resol_mean  ?
_diffrn_reflns_number             42111
_diffrn_reflns_av_unetI/netI      0.0694
_diffrn_reflns_av_R_equivalents   0.0545
_diffrn_reflns_limit_h_min        -27
_diffrn_reflns_limit_h_max        23
_diffrn_reflns_limit_k_min        -23
_diffrn_reflns_limit_k_max        26
_diffrn_reflns_limit_l_min        -36
_diffrn_reflns_limit_l_max        35
_diffrn_reflns_theta_min          1.521
_diffrn_reflns_theta_max          30.734
_diffrn_reflns_theta_full         25.242
_diffrn_measured_fraction_theta_max   0.857
_diffrn_measured_fraction_theta_full  0.997
_diffrn_reflns_Laue_measured_fraction_max    0.857
_diffrn_reflns_Laue_measured_fraction_full   0.997
_diffrn_reflns_point_group_measured_fraction_max   0.857
_diffrn_reflns_point_group_measured_fraction_full  0.997
_reflns_number_total              12428
_reflns_number_gt                 9517
_reflns_threshold_expression      'I > 2\s(I)'
_reflns_Friedel_coverage          0.000
_reflns_Friedel_fraction_max      .
_reflns_Friedel_fraction_full     .
 
_reflns_special_details
;
 Reflections were merged by SHELXL according to the crystal
 class for the calculation of statistics and refinement.
 
 _reflns_Friedel_fraction is defined as the number of unique
 Friedel pairs measured divided by the number that would be
 possible theoretically, ignoring centric projections and
 systematic absences.
;
 
_computing_data_collection        'Nonius Collect (Nonius, 1998)' 
_computing_cell_refinement        'HKL3000 (Otwinowski & Minor, 1997)' 
_computing_data_reduction         'HKL3000 (Otwinowski & Minor, 1997)'
_computing_structure_solution     'SHELXS-97 (Sheldrick, 2008)' 
_computing_structure_refinement   
;  
SHELXL-2014/7 (Sheldrick, 2014), 
SHELXLE Rev761 (H\"ubschle et al., 2011)
; 
_computing_molecular_graphics     ?
_computing_publication_material   ?
_refine_special_details           
;
An outer sphere THF molecule is disordered over a C2 rotational axis. 
Chemically equivalent bond distances and angles were restrained to be 
similiar (using SADI commands for SHelXl). A rigid bond restraint was 
applied to the disordered atoms (RIGU command in Shelxl).   
;


_refine_ls_structure_factor_coef  Fsqd
_refine_ls_matrix_type            full
_refine_ls_weighting_scheme       calc
_refine_ls_weighting_details
'w=1/[\s^2^(Fo^2^)+44.0863P] where P=(Fo^2^+2Fc^2^)/3'
_atom_sites_solution_primary      direct 
_atom_sites_solution_secondary    difmap
_atom_sites_solution_hydrogens    geom
_refine_ls_hydrogen_treatment     constr
_refine_ls_extinction_method      none
_refine_ls_extinction_coef        .
_refine_ls_number_reflns          12428
_refine_ls_number_parameters      536
_refine_ls_number_restraints      36
_refine_ls_R_factor_all           0.0772
_refine_ls_R_factor_gt            0.0468
_refine_ls_wR_factor_ref          0.0920
_refine_ls_wR_factor_gt           0.0797
_refine_ls_goodness_of_fit_ref    1.137
_refine_ls_restrained_S_all       1.137
_refine_ls_shift/su_max           0.000
_refine_ls_shift/su_mean          0.000
 
loop_
 _atom_site_label
 _atom_site_type_symbol
 _atom_site_fract_x
 _atom_site_fract_y
 _atom_site_fract_z
 _atom_site_U_iso_or_equiv
 _atom_site_adp_type
 _atom_site_occupancy
 _atom_site_site_symmetry_order  
 _atom_site_calc_flag
 _atom_site_refinement_flags_posn
 _atom_site_refinement_flags_adp
 _atom_site_refinement_flags_occupancy
 _atom_site_disorder_assembly
 _atom_site_disorder_group
U1 U 0.0000 0.05582(2) 0.2500 0.02239(6) Uani 1 2 d S T P . .
K1 K 0.36904(4) 0.11510(4) 0.00766(3) 0.02137(16) Uani 1 1 d . . . . .
O1 O 0.46875(13) 0.02589(13) 0.08479(11) 0.0285(6) Uani 1 1 d . . . . .
O2 O 0.29266(14) 0.14146(13) 0.08078(10) 0.0293(6) Uani 1 1 d . . . . .
O3 O 0.27575(13) 0.01905(13) -0.06681(10) 0.0271(6) Uani 1 1 d . . . . .
O4 O 0.30696(13) 0.14594(13) -0.10702(10) 0.0258(5) Uani 1 1 d . . . . .
O5 O 0.37061(13) 0.24584(13) 0.05271(11) 0.0282(6) Uani 1 1 d . . . . .
O6 O 0.51988(13) 0.11860(13) 0.02379(10) 0.0272(6) Uani 1 1 d . . . . .
N1 N -0.04035(16) 0.10715(16) 0.17535(12) 0.0256(7) Uani 1 1 d . . . . .
N2 N 0.08482(16) -0.00232(16) 0.24616(12) 0.0254(6) Uani 1 1 d . . . . .
N3 N 0.31354(16) -0.00206(16) 0.05348(13) 0.0282(7) Uani 1 1 d . . . . .
N4 N 0.42552(15) 0.23243(15) -0.03700(12) 0.0234(6) Uani 1 1 d . . . . .
C1 C -0.06573(18) 0.12504(18) 0.12045(14) 0.0223(7) Uani 1 1 d . . . . .
C2 C -0.04260(18) 0.08924(18) 0.08207(14) 0.0222(7) Uani 1 1 d . . . . .
C3 C -0.07274(19) 0.10507(19) 0.02611(15) 0.0264(8) Uani 1 1 d . . . . .
H3 H -0.0574 0.0801 0.0009 0.032 Uiso 1 1 calc R U . . .
C4 C -0.12443(19) 0.1560(2) 0.00596(15) 0.0273(8) Uani 1 1 d . . . . .
H4 H -0.1447 0.1657 -0.0326 0.033 Uiso 1 1 calc R U . . .
C5 C -0.14626(19) 0.19302(19) 0.04317(15) 0.0267(8) Uani 1 1 d . . . . .
H5 H -0.1813 0.2284 0.0296 0.032 Uiso 1 1 calc R U . . .
C6 C -0.11818(18) 0.17947(18) 0.09948(14) 0.0232(7) Uani 1 1 d . . . . .
C7 C 0.01159(19) 0.03068(19) 0.10280(15) 0.0261(8) Uani 1 1 d . . . . .
H7 H 0.0329 0.0346 0.1441 0.031 Uiso 1 1 calc R U . . .
C8 C -0.0268(2) -0.03892(19) 0.08959(17) 0.0340(9) Uani 1 1 d . . . . .
H8A H -0.0541 -0.0422 0.0497 0.051 Uiso 1 1 calc R U . . .
H8B H -0.0600 -0.0430 0.1095 0.051 Uiso 1 1 calc R U . . .
H8C H 0.0088 -0.0762 0.1011 0.051 Uiso 1 1 calc R U . . .
C9 C 0.0738(2) 0.0339(2) 0.08251(16) 0.0318(9) Uani 1 1 d . . . . .
H9A H 0.0551 0.0305 0.0420 0.048 Uiso 1 1 calc R U . . .
H9B H 0.1069 -0.0046 0.0984 0.048 Uiso 1 1 calc R U . . .
H9C H 0.0995 0.0778 0.0940 0.048 Uiso 1 1 calc R U . . .
C10 C -0.1396(2) 0.2200(2) 0.14075(17) 0.0355(9) Uani 1 1 d . . . . .
H10 H -0.1436 0.1865 0.1688 0.043 Uiso 1 1 calc R U . . .
C11 C -0.0799(3) 0.2722(2) 0.1716(2) 0.0524(12) Uani 1 1 d . . . . .
H11A H -0.0745 0.3059 0.1452 0.079 Uiso 1 1 calc R U . . .
H11B H -0.0343 0.2476 0.1895 0.079 Uiso 1 1 calc R U . . .
H11C H -0.0930 0.2963 0.1998 0.079 Uiso 1 1 calc R U . . .
C12 C -0.2122(3) 0.2570(3) 0.1154(2) 0.0514(13) Uani 1 1 d . . . . .
H12A H -0.2091 0.2925 0.0894 0.077 Uiso 1 1 calc R U . . .
H12B H -0.2245 0.2787 0.1449 0.077 Uiso 1 1 calc R U . . .
H12C H -0.2496 0.2234 0.0957 0.077 Uiso 1 1 calc R U . . .
C13 C 0.14123(19) -0.02621(19) 0.23385(14) 0.0246(8) Uani 1 1 d . . . . .
C14 C 0.1431(2) -0.0949(2) 0.21419(15) 0.0289(8) Uani 1 1 d . . . . .
C15 C 0.2011(2) -0.1159(2) 0.20072(17) 0.0382(10) Uani 1 1 d . . . . .
H15 H 0.2012 -0.1614 0.1870 0.046 Uiso 1 1 calc R U . . .
C16 C 0.2587(2) -0.0730(2) 0.20656(18) 0.0401(11) Uani 1 1 d . . . . .
H16 H 0.2976 -0.0885 0.1966 0.048 Uiso 1 1 calc R U . . .
C17 C 0.2588(2) -0.0068(2) 0.22721(16) 0.0350(9) Uani 1 1 d . . . . .
H17 H 0.2988 0.0226 0.2321 0.042 Uiso 1 1 calc R U . . .
C18 C 0.2020(2) 0.0176(2) 0.24098(14) 0.0268(8) Uani 1 1 d . . . . .
C19 C 0.0833(2) -0.1447(2) 0.21235(16) 0.0331(9) Uani 1 1 d . . . . .
H19 H 0.0375 -0.1177 0.2014 0.040 Uiso 1 1 calc R U . . .
C20 C 0.0712(3) -0.2043(2) 0.1710(2) 0.0515(12) Uani 1 1 d . . . . .
H20A H 0.0668 -0.1858 0.1347 0.077 Uiso 1 1 calc R U . . .
H20B H 0.0270 -0.2290 0.1677 0.077 Uiso 1 1 calc R U . . .
H20C H 0.1122 -0.2362 0.1841 0.077 Uiso 1 1 calc R U . . .
C21 C 0.0989(2) -0.1731(2) 0.27088(18) 0.0438(11) Uani 1 1 d . . . . .
H21A H 0.0604 -0.2051 0.2701 0.066 Uiso 1 1 calc R U . . .
H21B H 0.1010 -0.1348 0.2961 0.066 Uiso 1 1 calc R U . . .
H21C H 0.1451 -0.1976 0.2838 0.066 Uiso 1 1 calc R U . . .
C22 C 0.20269(19) 0.0901(2) 0.26396(15) 0.0274(8) Uani 1 1 d . . . . .
H22 H 0.1763 0.0876 0.2901 0.033 Uiso 1 1 calc R U . . .
C23 C 0.2777(2) 0.1174(3) 0.2968(2) 0.0501(12) Uani 1 1 d . . . . .
H23A H 0.3031 0.1268 0.2716 0.075 Uiso 1 1 calc R U . . .
H23B H 0.3046 0.0829 0.3242 0.075 Uiso 1 1 calc R U . . .
H23C H 0.2739 0.1602 0.3158 0.075 Uiso 1 1 calc R U . . .
C24 C 0.1621(2) 0.1414(2) 0.21884(16) 0.0339(9) Uani 1 1 d . . . . .
H24A H 0.1864 0.1455 0.1923 0.051 Uiso 1 1 calc R U . . .
H24B H 0.1613 0.1867 0.2355 0.051 Uiso 1 1 calc R U . . .
H24C H 0.1127 0.1252 0.1997 0.051 Uiso 1 1 calc R U . . .
C25 C 0.3234(2) 0.1981(2) 0.11655(16) 0.0341(9) Uani 1 1 d . . . . .
H25A H 0.3729 0.1864 0.1416 0.041 Uiso 1 1 calc R U . . .
H25B H 0.2943 0.2083 0.1395 0.041 Uiso 1 1 calc R U . . .
C26 C 0.3249(2) 0.2596(2) 0.08249(16) 0.0324(9) Uani 1 1 d . . . . .
H26A H 0.2756 0.2701 0.0563 0.039 Uiso 1 1 calc R U . . .
H26B H 0.3430 0.3003 0.1068 0.039 Uiso 1 1 calc R U . . .
C27 C 0.3757(2) 0.30397(19) 0.02094(17) 0.0302(8) Uani 1 1 d . . . . .
H27A H 0.3850 0.3462 0.0441 0.036 Uiso 1 1 calc R U . . .
H27B H 0.3297 0.3103 -0.0108 0.036 Uiso 1 1 calc R U . . .
C28 C 0.4364(2) 0.29269(19) 0.00008(16) 0.0294(8) Uani 1 1 d . . . . .
H28A H 0.4416 0.3346 -0.0200 0.035 Uiso 1 1 calc R U . . .
H28B H 0.4819 0.2864 0.0322 0.035 Uiso 1 1 calc R U . . .
C29 C 0.3745(2) 0.2510(2) -0.09246(15) 0.0313(9) Uani 1 1 d . . . . .
H29A H 0.3989 0.2827 -0.1100 0.038 Uiso 1 1 calc R U . . .
H29B H 0.3336 0.2765 -0.0885 0.038 Uiso 1 1 calc R U . . .
C30 C 0.3453(2) 0.1902(2) -0.13032(15) 0.0316(9) Uani 1 1 d . . . . .
H30A H 0.3128 0.2066 -0.1671 0.038 Uiso 1 1 calc R U . . .
H30B H 0.3855 0.1644 -0.1352 0.038 Uiso 1 1 calc R U . . .
C31 C 0.27684(19) 0.0884(2) -0.14237(14) 0.0272(8) Uani 1 1 d . . . . .
H31A H 0.3160 0.0591 -0.1454 0.033 Uiso 1 1 calc R U . . .
H31B H 0.2471 0.1050 -0.1799 0.033 Uiso 1 1 calc R U . . .
C32 C 0.23125(19) 0.0471(2) -0.11902(14) 0.0276(8) Uani 1 1 d . . . . .
H32A H 0.1936 0.0769 -0.1143 0.033 Uiso 1 1 calc R U . . .
H32B H 0.2071 0.0092 -0.1448 0.033 Uiso 1 1 calc R U . . .
C33 C 0.2347(2) -0.0249(2) -0.04533(18) 0.0400(10) Uani 1 1 d . . . . .
H33A H 0.2132 -0.0631 -0.0716 0.048 Uiso 1 1 calc R U . . .
H33B H 0.1951 0.0017 -0.0403 0.048 Uiso 1 1 calc R U . . .
C34 C 0.2836(2) -0.0538(2) 0.00944(16) 0.0381(9) Uani 1 1 d . . . . .
H34A H 0.2563 -0.0884 0.0221 0.046 Uiso 1 1 calc R U . . .
H34B H 0.3240 -0.0782 0.0038 0.046 Uiso 1 1 calc R U . . .
C35 C 0.53947(19) 0.0212(2) 0.08327(17) 0.0330(9) Uani 1 1 d . . . . .
H35A H 0.5387 -0.0089 0.0522 0.040 Uiso 1 1 calc R U . . .
H35B H 0.5728 0.0006 0.1182 0.040 Uiso 1 1 calc R U . . .
C36 C 0.56514(19) 0.0917(2) 0.07594(15) 0.0320(9) Uani 1 1 d . . . . .
H36A H 0.5638 0.1225 0.1060 0.038 Uiso 1 1 calc R U . . .
H36B H 0.6155 0.0893 0.0776 0.038 Uiso 1 1 calc R U . . .
C37 C 0.54783(19) 0.1820(2) 0.01118(16) 0.0296(8) Uani 1 1 d . . . . .
H37A H 0.5942 0.1731 0.0066 0.035 Uiso 1 1 calc R U . . .
H37B H 0.5566 0.2151 0.0420 0.035 Uiso 1 1 calc R U . . .
C38 C 0.49487(19) 0.2121(2) -0.04116(16) 0.0286(8) Uani 1 1 d . . . . .
H38A H 0.5168 0.2533 -0.0514 0.034 Uiso 1 1 calc R U . . .
H38B H 0.4854 0.1778 -0.0713 0.034 Uiso 1 1 calc R U . . .
C39 C 0.4413(2) -0.04080(19) 0.08951(16) 0.0306(9) Uani 1 1 d . . . . .
H39A H 0.4772 -0.0665 0.1204 0.037 Uiso 1 1 calc R U . . .
H39B H 0.4323 -0.0672 0.0549 0.037 Uiso 1 1 calc R U . . .
C40 C 0.3724(2) -0.0333(2) 0.09995(16) 0.0312(9) Uani 1 1 d . . . . .
H40A H 0.3569 -0.0796 0.1076 0.037 Uiso 1 1 calc R U . . .
H40B H 0.3816 -0.0045 0.1334 0.037 Uiso 1 1 calc R U . . .
C41 C 0.2567(2) 0.0224(2) 0.07280(18) 0.0373(10) Uani 1 1 d . . . . .
H41A H 0.2436 -0.0157 0.0928 0.045 Uiso 1 1 calc R U . . .
H41B H 0.2134 0.0342 0.0402 0.045 Uiso 1 1 calc R U . . .
C42 C 0.2781(2) 0.0840(2) 0.11000(17) 0.0355(9) Uani 1 1 d . . . . .
H42A H 0.2387 0.0962 0.1230 0.043 Uiso 1 1 calc R U . . .
H42B H 0.3216 0.0731 0.1428 0.043 Uiso 1 1 calc R U . . .
O7 O 0.4314(7) 0.0620(7) 0.2479(6) 0.137(4) Uani 0.5 1 d D U P A -1
C100 C 0.4731(11) 0.0031(10) 0.2538(10) 0.100(5) Uani 0.5 1 d D U P A -1
H10A H 0.4441 -0.0353 0.2312 0.120 Uiso 0.5 1 calc R U P A -1
H10B H 0.4936 -0.0117 0.2930 0.120 Uiso 0.5 1 calc R U P A -1
C101 C 0.5327(9) 0.0245(7) 0.2332(9) 0.087(5) Uani 0.5 1 d D U P A -1
H10C H 0.5807 0.0116 0.2604 0.104 Uiso 0.5 1 calc R U P A -1
H10D H 0.5260 0.0022 0.1973 0.104 Uiso 0.5 1 calc R U P A -1
C102 C 0.5255(14) 0.1026(8) 0.2268(13) 0.114(7) Uani 0.5 1 d D U P A -1
H10E H 0.5036 0.1160 0.1873 0.137 Uiso 0.5 1 calc R U P A -1
H10F H 0.5729 0.1256 0.2437 0.137 Uiso 0.5 1 calc R U P A -1
C103 C 0.4758(12) 0.1207(10) 0.2579(10) 0.102(5) Uani 0.5 1 d D U P A -1
H10G H 0.5034 0.1272 0.2979 0.122 Uiso 0.5 1 calc R U P A -1
H10H H 0.4475 0.1630 0.2427 0.122 Uiso 0.5 1 calc R U P A -1
 
loop_
 _atom_site_aniso_label
 _atom_site_aniso_U_11
 _atom_site_aniso_U_22
 _atom_site_aniso_U_33
 _atom_site_aniso_U_23
 _atom_site_aniso_U_13
 _atom_site_aniso_U_12
U1 0.02266(9) 0.02371(10) 0.01928(9) 0.000 0.00589(7) 0.000
K1 0.0203(3) 0.0189(4) 0.0230(4) -0.0009(3) 0.0057(3) -0.0007(3)
O1 0.0219(12) 0.0266(14) 0.0353(14) 0.0045(11) 0.0084(11) 0.0050(11)
O2 0.0331(14) 0.0281(15) 0.0290(14) 0.0019(11) 0.0141(12) 0.0013(11)
O3 0.0244(12) 0.0232(14) 0.0280(13) -0.0002(11) 0.0031(11) -0.0061(10)
O4 0.0277(13) 0.0256(14) 0.0228(12) -0.0031(10) 0.0076(11) -0.0047(11)
O5 0.0308(13) 0.0212(14) 0.0354(14) -0.0041(11) 0.0154(12) 0.0020(11)
O6 0.0190(12) 0.0297(15) 0.0295(14) 0.0018(11) 0.0049(11) -0.0020(11)
N1 0.0255(15) 0.0274(17) 0.0240(15) 0.0016(13) 0.0094(13) 0.0053(13)
N2 0.0259(15) 0.0250(17) 0.0230(15) -0.0016(13) 0.0063(13) 0.0021(13)
N3 0.0253(15) 0.0240(17) 0.0319(17) 0.0039(13) 0.0065(14) 0.0006(13)
N4 0.0237(15) 0.0190(15) 0.0255(15) -0.0013(12) 0.0067(13) -0.0016(12)
C1 0.0209(16) 0.0192(18) 0.0251(18) 0.0018(14) 0.0064(15) -0.0037(14)
C2 0.0207(16) 0.0206(18) 0.0241(17) 0.0004(14) 0.0068(15) -0.0043(14)
C3 0.0292(19) 0.023(2) 0.0257(18) 0.0000(15) 0.0091(16) -0.0032(15)
C4 0.0260(18) 0.030(2) 0.0220(18) 0.0054(15) 0.0041(15) -0.0063(16)
C5 0.0208(17) 0.0217(19) 0.035(2) 0.0085(16) 0.0066(16) -0.0022(14)
C6 0.0228(17) 0.0201(19) 0.0288(19) 0.0035(14) 0.0121(15) -0.0015(14)
C7 0.0275(18) 0.0250(19) 0.0246(18) 0.0002(15) 0.0080(16) 0.0009(15)
C8 0.035(2) 0.023(2) 0.041(2) 0.0070(16) 0.0098(18) -0.0019(16)
C9 0.032(2) 0.029(2) 0.036(2) -0.0008(16) 0.0133(18) 0.0020(16)
C10 0.044(2) 0.027(2) 0.042(2) 0.0065(18) 0.023(2) 0.0087(18)
C11 0.068(3) 0.038(3) 0.050(3) -0.010(2) 0.020(3) 0.007(2)
C12 0.053(3) 0.049(3) 0.063(3) 0.010(2) 0.033(3) 0.023(2)
C13 0.0235(18) 0.029(2) 0.0172(17) 0.0047(14) 0.0031(15) 0.0058(15)
C14 0.035(2) 0.029(2) 0.0202(18) 0.0035(15) 0.0067(16) 0.0074(17)
C15 0.051(3) 0.033(2) 0.033(2) 0.0019(18) 0.019(2) 0.014(2)
C16 0.049(3) 0.037(3) 0.045(2) 0.0082(19) 0.030(2) 0.016(2)
C17 0.036(2) 0.037(2) 0.037(2) 0.0113(18) 0.0192(19) 0.0058(18)
C18 0.0301(19) 0.030(2) 0.0195(17) 0.0045(15) 0.0080(16) 0.0075(16)
C19 0.038(2) 0.024(2) 0.028(2) -0.0003(16) 0.0017(17) 0.0026(17)
C20 0.058(3) 0.033(3) 0.048(3) -0.009(2) 0.001(2) 0.006(2)
C21 0.042(2) 0.040(3) 0.041(2) 0.010(2) 0.004(2) -0.005(2)
C22 0.0259(18) 0.029(2) 0.0233(18) 0.0011(15) 0.0042(16) -0.0016(16)
C23 0.035(2) 0.050(3) 0.054(3) -0.010(2) 0.003(2) -0.002(2)
C24 0.043(2) 0.026(2) 0.032(2) 0.0011(17) 0.0126(19) 0.0022(18)
C25 0.034(2) 0.040(2) 0.030(2) -0.0061(18) 0.0129(18) 0.0038(18)
C26 0.035(2) 0.031(2) 0.035(2) -0.0105(17) 0.0167(18) -0.0001(17)
C27 0.0302(19) 0.0196(19) 0.041(2) -0.0039(16) 0.0130(18) -0.0036(16)
C28 0.0292(19) 0.022(2) 0.036(2) -0.0035(16) 0.0104(17) -0.0072(16)
C29 0.034(2) 0.025(2) 0.032(2) 0.0040(16) 0.0078(17) -0.0046(16)
C30 0.033(2) 0.035(2) 0.0243(19) 0.0034(16) 0.0078(17) -0.0054(17)
C31 0.0259(18) 0.030(2) 0.0217(18) -0.0063(15) 0.0036(15) 0.0019(16)
C32 0.0246(17) 0.025(2) 0.0262(18) -0.0040(16) 0.0007(15) -0.0017(15)
C33 0.034(2) 0.034(2) 0.043(2) 0.0033(19) 0.0037(19) -0.0163(18)
C34 0.040(2) 0.026(2) 0.042(2) 0.005(2) 0.0073(18) -0.010(2)
C35 0.0199(18) 0.042(2) 0.035(2) 0.0076(18) 0.0075(17) 0.0100(17)
C36 0.0193(17) 0.046(3) 0.027(2) 0.0001(17) 0.0036(16) 0.0028(17)
C37 0.0223(18) 0.030(2) 0.036(2) -0.0042(17) 0.0103(17) -0.0042(16)
C38 0.0268(19) 0.026(2) 0.035(2) -0.0014(16) 0.0143(17) -0.0037(16)
C39 0.033(2) 0.021(2) 0.034(2) 0.0037(15) 0.0084(17) 0.0049(15)
C40 0.033(2) 0.025(2) 0.035(2) 0.0087(16) 0.0118(18) 0.0018(16)
C41 0.028(2) 0.036(2) 0.050(3) 0.013(2) 0.0173(19) -0.0015(18)
C42 0.035(2) 0.038(2) 0.042(2) 0.0139(19) 0.024(2) 0.0074(18)
O7 0.083(7) 0.179(10) 0.160(12) -0.016(9) 0.058(7) -0.023(7)
C100 0.067(9) 0.176(11) 0.057(10) -0.003(8) 0.023(7) -0.022(7)
C101 0.044(6) 0.140(10) 0.068(12) -0.025(9) 0.010(6) -0.044(7)
C102 0.091(11) 0.149(11) 0.12(2) -0.012(10) 0.060(13) -0.018(9)
C103 0.061(8) 0.163(10) 0.071(13) -0.005(8) 0.012(7) 0.001(7)
 
_geom_special_details
;
 All esds (except the esd in the dihedral angle between two l.s. planes)
 are estimated using the full covariance matrix.  The cell esds are taken
 into account individually in the estimation of esds in distances, angles
 and torsion angles; correlations between esds in cell parameters are only
 used when they are defined by crystal symmetry.  An approximate (isotropic)
 treatment of cell esds is used for estimating esds involving l.s. planes.
;
 
loop_
 _geom_bond_atom_site_label_1
 _geom_bond_atom_site_label_2
 _geom_bond_distance
 _geom_bond_site_symmetry_2
 _geom_bond_publ_flag
U1 N1 2.060(3) . ?
U1 N1 2.061(3) 2 ?
U1 N2 2.064(3) 2 ?
U1 N2 2.064(3) . ?
K1 O5 2.782(3) . ?
K1 O3 2.831(3) . ?
K1 O1 2.833(3) . ?
K1 O4 2.837(3) . ?
K1 O2 2.881(3) . ?
K1 O6 2.882(3) . ?
K1 N4 2.953(3) . ?
K1 N3 2.957(3) . ?
O1 C39 1.424(4) . ?
O1 C35 1.428(4) . ?
O2 C25 1.421(5) . ?
O2 C42 1.434(4) . ?
O3 C32 1.427(4) . ?
O3 C33 1.429(5) . ?
O4 C30 1.422(4) . ?
O4 C31 1.427(4) . ?
O5 C27 1.420(4) . ?
O5 C26 1.420(4) . ?
O6 C36 1.422(4) . ?
O6 C37 1.433(4) . ?
N1 C1 1.370(4) . ?
N2 C13 1.358(5) . ?
N3 C40 1.470(5) . ?
N3 C34 1.472(5) . ?
N3 C41 1.475(5) . ?
N4 C29 1.471(5) . ?
N4 C28 1.476(5) . ?
N4 C38 1.479(4) . ?
C1 C2 1.422(5) . ?
C1 C6 1.443(5) . ?
C2 C3 1.388(5) . ?
C2 C7 1.521(5) . ?
C3 C4 1.383(5) . ?
C3 H3 0.9500 . ?
C4 C5 1.394(5) . ?
C4 H4 0.9500 . ?
C5 C6 1.385(5) . ?
C5 H5 0.9500 . ?
C6 C10 1.510(5) . ?
C7 C9 1.515(5) . ?
C7 C8 1.525(5) . ?
C7 H7 1.0000 . ?
C8 H8A 0.9800 . ?
C8 H8B 0.9800 . ?
C8 H8C 0.9800 . ?
C9 H9A 0.9800 . ?
C9 H9B 0.9800 . ?
C9 H9C 0.9800 . ?
C10 C12 1.531(6) . ?
C10 C11 1.542(6) . ?
C10 H10 1.0000 . ?
C11 H11A 0.9800 . ?
C11 H11B 0.9800 . ?
C11 H11C 0.9800 . ?
C12 H12A 0.9800 . ?
C12 H12B 0.9800 . ?
C12 H12C 0.9800 . ?
C13 C14 1.430(5) . ?
C13 C18 1.435(5) . ?
C14 C15 1.387(5) . ?
C14 C19 1.519(6) . ?
C15 C16 1.380(6) . ?
C15 H15 0.9500 . ?
C16 C17 1.388(6) . ?
C16 H16 0.9500 . ?
C17 C18 1.389(5) . ?
C17 H17 0.9500 . ?
C18 C22 1.521(5) . ?
C19 C20 1.533(6) . ?
C19 C21 1.536(6) . ?
C19 H19 1.0000 . ?
C20 H20A 0.9800 . ?
C20 H20B 0.9800 . ?
C20 H20C 0.9800 . ?
C21 H21A 0.9800 . ?
C21 H21B 0.9800 . ?
C21 H21C 0.9800 . ?
C22 C23 1.520(5) . ?
C22 C24 1.523(5) . ?
C22 H22 1.0000 . ?
C23 H23A 0.9800 . ?
C23 H23B 0.9800 . ?
C23 H23C 0.9800 . ?
C24 H24A 0.9800 . ?
C24 H24B 0.9800 . ?
C24 H24C 0.9800 . ?
C25 C26 1.490(6) . ?
C25 H25A 0.9900 . ?
C25 H25B 0.9900 . ?
C26 H26A 0.9900 . ?
C26 H26B 0.9900 . ?
C27 C28 1.512(5) . ?
C27 H27A 0.9900 . ?
C27 H27B 0.9900 . ?
C28 H28A 0.9900 . ?
C28 H28B 0.9900 . ?
C29 C30 1.507(5) . ?
C29 H29A 0.9900 . ?
C29 H29B 0.9900 . ?
C30 H30A 0.9900 . ?
C30 H30B 0.9900 . ?
C31 C32 1.496(5) . ?
C31 H31A 0.9900 . ?
C31 H31B 0.9900 . ?
C32 H32A 0.9900 . ?
C32 H32B 0.9900 . ?
C33 C34 1.506(6) . ?
C33 H33A 0.9900 . ?
C33 H33B 0.9900 . ?
C34 H34A 0.9900 . ?
C34 H34B 0.9900 . ?
C35 C36 1.494(6) . ?
C35 H35A 0.9900 . ?
C35 H35B 0.9900 . ?
C36 H36A 0.9900 . ?
C36 H36B 0.9900 . ?
C37 C38 1.500(5) . ?
C37 H37A 0.9900 . ?
C37 H37B 0.9900 . ?
C38 H38A 0.9900 . ?
C38 H38B 0.9900 . ?
C39 C40 1.503(5) . ?
C39 H39A 0.9900 . ?
C39 H39B 0.9900 . ?
C40 H40A 0.9900 . ?
C40 H40B 0.9900 . ?
C41 C42 1.494(6) . ?
C41 H41A 0.9900 . ?
C41 H41B 0.9900 . ?
C42 H42A 0.9900 . ?
C42 H42B 0.9900 . ?
O7 C100 1.385(17) . ?
O7 C103 1.405(17) . ?
C100 C101 1.529(12) . ?
C100 H10A 0.9900 . ?
C100 H10B 0.9900 . ?
C101 C102 1.522(16) . ?
C101 H10C 0.9900 . ?
C101 H10D 0.9900 . ?
C102 C103 1.529(13) . ?
C102 H10E 0.9900 . ?
C102 H10F 0.9900 . ?
C103 H10G 0.9900 . ?
C103 H10H 0.9900 . ?
 
loop_
 _geom_angle_atom_site_label_1
 _geom_angle_atom_site_label_2
 _geom_angle_atom_site_label_3
 _geom_angle
 _geom_angle_site_symmetry_1
 _geom_angle_site_symmetry_3
 _geom_angle_publ_flag
N1 U1 N1 122.37(17) . 2 ?
N1 U1 N2 105.29(12) . 2 ?
N1 U1 N2 105.17(12) 2 2 ?
N1 U1 N2 105.17(12) . . ?
N1 U1 N2 105.28(12) 2 . ?
N2 U1 N2 113.95(17) 2 . ?
O5 K1 O3 141.92(8) . . ?
O5 K1 O1 111.11(8) . . ?
O3 K1 O1 101.42(8) . . ?
O5 K1 O4 100.55(8) . . ?
O3 K1 O4 59.79(7) . . ?
O1 K1 O4 142.48(8) . . ?
O5 K1 O2 59.30(7) . . ?
O3 K1 O2 101.08(8) . . ?
O1 K1 O2 92.63(8) . . ?
O4 K1 O2 121.41(8) . . ?
O5 K1 O6 93.85(8) . . ?
O3 K1 O6 120.29(8) . . ?
O1 K1 O6 59.11(7) . . ?
O4 K1 O6 100.28(8) . . ?
O2 K1 O6 132.51(8) . . ?
O5 K1 N4 61.24(8) . . ?
O3 K1 N4 119.10(8) . . ?
O1 K1 N4 118.42(8) . . ?
O4 K1 N4 60.60(8) . . ?
O2 K1 N4 119.49(8) . . ?
O6 K1 N4 60.73(8) . . ?
O5 K1 N3 118.44(8) . . ?
O3 K1 N3 61.46(8) . . ?
O1 K1 N3 61.17(8) . . ?
O4 K1 N3 119.97(8) . . ?
O2 K1 N3 60.30(8) . . ?
O6 K1 N3 118.96(8) . . ?
N4 K1 N3 179.43(9) . . ?
C39 O1 C35 111.1(3) . . ?
C39 O1 K1 114.9(2) . . ?
C35 O1 K1 117.6(2) . . ?
C25 O2 C42 112.0(3) . . ?
C25 O2 K1 111.2(2) . . ?
C42 O2 K1 118.0(2) . . ?
C32 O3 C33 110.5(3) . . ?
C32 O3 K1 115.1(2) . . ?
C33 O3 K1 116.9(2) . . ?
C30 O4 C31 111.2(3) . . ?
C30 O4 K1 118.5(2) . . ?
C31 O4 K1 115.4(2) . . ?
C27 O5 C26 111.4(3) . . ?
C27 O5 K1 117.9(2) . . ?
C26 O5 K1 119.3(2) . . ?
C36 O6 C37 111.5(3) . . ?
C36 O6 K1 113.2(2) . . ?
C37 O6 K1 117.4(2) . . ?
C1 N1 U1 165.4(3) . . ?
C13 N2 U1 163.9(3) . . ?
C40 N3 C34 109.4(3) . . ?
C40 N3 C41 109.6(3) . . ?
C34 N3 C41 109.8(3) . . ?
C40 N3 K1 110.0(2) . . ?
C34 N3 K1 108.3(2) . . ?
C41 N3 K1 109.7(2) . . ?
C29 N4 C28 109.2(3) . . ?
C29 N4 C38 108.9(3) . . ?
C28 N4 C38 109.8(3) . . ?
C29 N4 K1 110.2(2) . . ?
C28 N4 K1 109.7(2) . . ?
C38 N4 K1 109.0(2) . . ?
N1 C1 C2 121.0(3) . . ?
N1 C1 C6 121.1(3) . . ?
C2 C1 C6 117.9(3) . . ?
C3 C2 C1 119.9(3) . . ?
C3 C2 C7 120.9(3) . . ?
C1 C2 C7 119.1(3) . . ?
C4 C3 C2 122.0(3) . . ?
C4 C3 H3 119.0 . . ?
C2 C3 H3 119.0 . . ?
C3 C4 C5 118.9(3) . . ?
C3 C4 H4 120.6 . . ?
C5 C4 H4 120.6 . . ?
C6 C5 C4 121.7(3) . . ?
C6 C5 H5 119.1 . . ?
C4 C5 H5 119.1 . . ?
C5 C6 C1 119.6(3) . . ?
C5 C6 C10 122.7(3) . . ?
C1 C6 C10 117.8(3) . . ?
C9 C7 C2 114.4(3) . . ?
C9 C7 C8 111.4(3) . . ?
C2 C7 C8 110.2(3) . . ?
C9 C7 H7 106.8 . . ?
C2 C7 H7 106.8 . . ?
C8 C7 H7 106.8 . . ?
C7 C8 H8A 109.5 . . ?
C7 C8 H8B 109.5 . . ?
H8A C8 H8B 109.5 . . ?
C7 C8 H8C 109.5 . . ?
H8A C8 H8C 109.5 . . ?
H8B C8 H8C 109.5 . . ?
C7 C9 H9A 109.5 . . ?
C7 C9 H9B 109.5 . . ?
H9A C9 H9B 109.5 . . ?
C7 C9 H9C 109.5 . . ?
H9A C9 H9C 109.5 . . ?
H9B C9 H9C 109.5 . . ?
C6 C10 C12 114.0(4) . . ?
C6 C10 C11 110.1(3) . . ?
C12 C10 C11 110.3(4) . . ?
C6 C10 H10 107.4 . . ?
C12 C10 H10 107.4 . . ?
C11 C10 H10 107.4 . . ?
C10 C11 H11A 109.5 . . ?
C10 C11 H11B 109.5 . . ?
H11A C11 H11B 109.5 . . ?
C10 C11 H11C 109.5 . . ?
H11A C11 H11C 109.5 . . ?
H11B C11 H11C 109.5 . . ?
C10 C12 H12A 109.5 . . ?
C10 C12 H12B 109.5 . . ?
H12A C12 H12B 109.5 . . ?
C10 C12 H12C 109.5 . . ?
H12A C12 H12C 109.5 . . ?
H12B C12 H12C 109.5 . . ?
N2 C13 C14 122.2(3) . . ?
N2 C13 C18 120.1(3) . . ?
C14 C13 C18 117.7(3) . . ?
C15 C14 C13 119.7(4) . . ?
C15 C14 C19 121.6(4) . . ?
C13 C14 C19 118.6(3) . . ?
C16 C15 C14 122.3(4) . . ?
C16 C15 H15 118.8 . . ?
C14 C15 H15 118.8 . . ?
C15 C16 C17 118.7(4) . . ?
C15 C16 H16 120.6 . . ?
C17 C16 H16 120.6 . . ?
C16 C17 C18 121.9(4) . . ?
C16 C17 H17 119.1 . . ?
C18 C17 H17 119.1 . . ?
C17 C18 C13 119.7(4) . . ?
C17 C18 C22 121.6(4) . . ?
C13 C18 C22 118.7(3) . . ?
C14 C19 C20 114.8(4) . . ?
C14 C19 C21 108.9(3) . . ?
C20 C19 C21 110.3(4) . . ?
C14 C19 H19 107.5 . . ?
C20 C19 H19 107.5 . . ?
C21 C19 H19 107.5 . . ?
C19 C20 H20A 109.5 . . ?
C19 C20 H20B 109.5 . . ?
H20A C20 H20B 109.5 . . ?
C19 C20 H20C 109.5 . . ?
H20A C20 H20C 109.5 . . ?
H20B C20 H20C 109.5 . . ?
C19 C21 H21A 109.5 . . ?
C19 C21 H21B 109.5 . . ?
H21A C21 H21B 109.5 . . ?
C19 C21 H21C 109.5 . . ?
H21A C21 H21C 109.5 . . ?
H21B C21 H21C 109.5 . . ?
C23 C22 C18 113.9(3) . . ?
C23 C22 C24 109.9(3) . . ?
C18 C22 C24 111.9(3) . . ?
C23 C22 H22 106.9 . . ?
C18 C22 H22 106.9 . . ?
C24 C22 H22 106.9 . . ?
C22 C23 H23A 109.5 . . ?
C22 C23 H23B 109.5 . . ?
H23A C23 H23B 109.5 . . ?
C22 C23 H23C 109.5 . . ?
H23A C23 H23C 109.5 . . ?
H23B C23 H23C 109.5 . . ?
C22 C24 H24A 109.5 . . ?
C22 C24 H24B 109.5 . . ?
H24A C24 H24B 109.5 . . ?
C22 C24 H24C 109.5 . . ?
H24A C24 H24C 109.5 . . ?
H24B C24 H24C 109.5 . . ?
O2 C25 C26 109.0(3) . . ?
O2 C25 H25A 109.9 . . ?
C26 C25 H25A 109.9 . . ?
O2 C25 H25B 109.9 . . ?
C26 C25 H25B 109.9 . . ?
H25A C25 H25B 108.3 . . ?
O5 C26 C25 109.3(3) . . ?
O5 C26 H26A 109.8 . . ?
C25 C26 H26A 109.8 . . ?
O5 C26 H26B 109.8 . . ?
C25 C26 H26B 109.8 . . ?
H26A C26 H26B 108.3 . . ?
O5 C27 C28 109.3(3) . . ?
O5 C27 H27A 109.8 . . ?
C28 C27 H27A 109.8 . . ?
O5 C27 H27B 109.8 . . ?
C28 C27 H27B 109.8 . . ?
H27A C27 H27B 108.3 . . ?
N4 C28 C27 113.7(3) . . ?
N4 C28 H28A 108.8 . . ?
C27 C28 H28A 108.8 . . ?
N4 C28 H28B 108.8 . . ?
C27 C28 H28B 108.8 . . ?
H28A C28 H28B 107.7 . . ?
N4 C29 C30 114.2(3) . . ?
N4 C29 H29A 108.7 . . ?
C30 C29 H29A 108.7 . . ?
N4 C29 H29B 108.7 . . ?
C30 C29 H29B 108.7 . . ?
H29A C29 H29B 107.6 . . ?
O4 C30 C29 109.4(3) . . ?
O4 C30 H30A 109.8 . . ?
C29 C30 H30A 109.8 . . ?
O4 C30 H30B 109.8 . . ?
C29 C30 H30B 109.8 . . ?
H30A C30 H30B 108.2 . . ?
O4 C31 C32 109.4(3) . . ?
O4 C31 H31A 109.8 . . ?
C32 C31 H31A 109.8 . . ?
O4 C31 H31B 109.8 . . ?
C32 C31 H31B 109.8 . . ?
H31A C31 H31B 108.2 . . ?
O3 C32 C31 109.2(3) . . ?
O3 C32 H32A 109.8 . . ?
C31 C32 H32A 109.8 . . ?
O3 C32 H32B 109.8 . . ?
C31 C32 H32B 109.8 . . ?
H32A C32 H32B 108.3 . . ?
O3 C33 C34 108.9(3) . . ?
O3 C33 H33A 109.9 . . ?
C34 C33 H33A 109.9 . . ?
O3 C33 H33B 109.9 . . ?
C34 C33 H33B 109.9 . . ?
H33A C33 H33B 108.3 . . ?
N3 C34 C33 114.8(4) . . ?
N3 C34 H34A 108.6 . . ?
C33 C34 H34A 108.6 . . ?
N3 C34 H34B 108.6 . . ?
C33 C34 H34B 108.6 . . ?
H34A C34 H34B 107.6 . . ?
O1 C35 C36 109.5(3) . . ?
O1 C35 H35A 109.8 . . ?
C36 C35 H35A 109.8 . . ?
O1 C35 H35B 109.8 . . ?
C36 C35 H35B 109.8 . . ?
H35A C35 H35B 108.2 . . ?
O6 C36 C35 109.1(3) . . ?
O6 C36 H36A 109.9 . . ?
C35 C36 H36A 109.9 . . ?
O6 C36 H36B 109.9 . . ?
C35 C36 H36B 109.9 . . ?
H36A C36 H36B 108.3 . . ?
O6 C37 C38 109.6(3) . . ?
O6 C37 H37A 109.7 . . ?
C38 C37 H37A 109.7 . . ?
O6 C37 H37B 109.7 . . ?
C38 C37 H37B 109.7 . . ?
H37A C37 H37B 108.2 . . ?
N4 C38 C37 113.8(3) . . ?
N4 C38 H38A 108.8 . . ?
C37 C38 H38A 108.8 . . ?
N4 C38 H38B 108.8 . . ?
C37 C38 H38B 108.8 . . ?
H38A C38 H38B 107.7 . . ?
O1 C39 C40 109.5(3) . . ?
O1 C39 H39A 109.8 . . ?
C40 C39 H39A 109.8 . . ?
O1 C39 H39B 109.8 . . ?
C40 C39 H39B 109.8 . . ?
H39A C39 H39B 108.2 . . ?
N3 C40 C39 113.5(3) . . ?
N3 C40 H40A 108.9 . . ?
C39 C40 H40A 108.9 . . ?
N3 C40 H40B 108.9 . . ?
C39 C40 H40B 108.9 . . ?
H40A C40 H40B 107.7 . . ?
N3 C41 C42 113.8(3) . . ?
N3 C41 H41A 108.8 . . ?
C42 C41 H41A 108.8 . . ?
N3 C41 H41B 108.8 . . ?
C42 C41 H41B 108.8 . . ?
H41A C41 H41B 107.7 . . ?
O2 C42 C41 109.9(3) . . ?
O2 C42 H42A 109.7 . . ?
C41 C42 H42A 109.7 . . ?
O2 C42 H42B 109.7 . . ?
C41 C42 H42B 109.7 . . ?
H42A C42 H42B 108.2 . . ?
C100 O7 C103 109.5(17) . . ?
O7 C100 C101 104.5(14) . . ?
O7 C100 H10A 110.8 . . ?
C101 C100 H10A 110.8 . . ?
O7 C100 H10B 110.8 . . ?
C101 C100 H10B 110.8 . . ?
H10A C100 H10B 108.9 . . ?
C102 C101 C100 104.6(10) . . ?
C102 C101 H10C 110.8 . . ?
C100 C101 H10C 110.8 . . ?
C102 C101 H10D 110.8 . . ?
C100 C101 H10D 110.8 . . ?
H10C C101 H10D 108.9 . . ?
C101 C102 C103 103.0(10) . . ?
C101 C102 H10E 111.2 . . ?
C103 C102 H10E 111.2 . . ?
C101 C102 H10F 111.2 . . ?
C103 C102 H10F 111.2 . . ?
H10E C102 H10F 109.1 . . ?
O7 C103 C102 101.7(14) . . ?
O7 C103 H10G 111.4 . . ?
C102 C103 H10G 111.4 . . ?
O7 C103 H10H 111.4 . . ?
C102 C103 H10H 111.4 . . ?
H10G C103 H10H 109.3 . . ?
 
loop_
 _geom_torsion_atom_site_label_1
 _geom_torsion_atom_site_label_2
 _geom_torsion_atom_site_label_3
 _geom_torsion_atom_site_label_4
 _geom_torsion
 _geom_torsion_site_symmetry_1
 _geom_torsion_site_symmetry_2
 _geom_torsion_site_symmetry_3
 _geom_torsion_site_symmetry_4
 _geom_torsion_publ_flag
U1 N1 C1 C2 -29.0(12) . . . . ?
U1 N1 C1 C6 149.3(8) . . . . ?
N1 C1 C2 C3 175.5(3) . . . . ?
C6 C1 C2 C3 -2.8(5) . . . . ?
N1 C1 C2 C7 -0.5(5) . . . . ?
C6 C1 C2 C7 -178.8(3) . . . . ?
C1 C2 C3 C4 1.2(5) . . . . ?
C7 C2 C3 C4 177.1(3) . . . . ?
C2 C3 C4 C5 0.7(5) . . . . ?
C3 C4 C5 C6 -0.8(5) . . . . ?
C4 C5 C6 C1 -1.0(5) . . . . ?
C4 C5 C6 C10 178.4(3) . . . . ?
N1 C1 C6 C5 -175.6(3) . . . . ?
C2 C1 C6 C5 2.7(5) . . . . ?
N1 C1 C6 C10 5.0(5) . . . . ?
C2 C1 C6 C10 -176.7(3) . . . . ?
C3 C2 C7 C9 51.3(5) . . . . ?
C1 C2 C7 C9 -132.7(3) . . . . ?
C3 C2 C7 C8 -75.1(4) . . . . ?
C1 C2 C7 C8 100.9(4) . . . . ?
C5 C6 C10 C12 21.7(5) . . . . ?
C1 C6 C10 C12 -158.9(4) . . . . ?
C5 C6 C10 C11 -102.8(4) . . . . ?
C1 C6 C10 C11 76.6(4) . . . . ?
U1 N2 C13 C14 -127.1(8) . . . . ?
U1 N2 C13 C18 53.6(10) . . . . ?
N2 C13 C14 C15 178.1(3) . . . . ?
C18 C13 C14 C15 -2.5(5) . . . . ?
N2 C13 C14 C19 -6.0(5) . . . . ?
C18 C13 C14 C19 173.3(3) . . . . ?
C13 C14 C15 C16 1.3(6) . . . . ?
C19 C14 C15 C16 -174.5(4) . . . . ?
C14 C15 C16 C17 0.7(6) . . . . ?
C15 C16 C17 C18 -1.3(6) . . . . ?
C16 C17 C18 C13 0.0(6) . . . . ?
C16 C17 C18 C22 179.6(4) . . . . ?
N2 C13 C18 C17 -178.7(3) . . . . ?
C14 C13 C18 C17 1.9(5) . . . . ?
N2 C13 C18 C22 1.7(5) . . . . ?
C14 C13 C18 C22 -177.7(3) . . . . ?
C15 C14 C19 C20 -27.7(5) . . . . ?
C13 C14 C19 C20 156.5(3) . . . . ?
C15 C14 C19 C21 96.4(4) . . . . ?
C13 C14 C19 C21 -79.4(4) . . . . ?
C17 C18 C22 C23 -29.5(5) . . . . ?
C13 C18 C22 C23 150.1(4) . . . . ?
C17 C18 C22 C24 95.9(4) . . . . ?
C13 C18 C22 C24 -84.5(4) . . . . ?
C42 O2 C25 C26 -170.0(3) . . . . ?
K1 O2 C25 C26 55.6(3) . . . . ?
C27 O5 C26 C25 -178.1(3) . . . . ?
K1 O5 C26 C25 39.2(4) . . . . ?
O2 C25 C26 O5 -63.4(4) . . . . ?
C26 O5 C27 C28 167.9(3) . . . . ?
K1 O5 C27 C28 -48.8(3) . . . . ?
C29 N4 C28 C27 78.4(4) . . . . ?
C38 N4 C28 C27 -162.3(3) . . . . ?
K1 N4 C28 C27 -42.5(4) . . . . ?
O5 C27 C28 N4 62.1(4) . . . . ?
C28 N4 C29 C30 -166.3(3) . . . . ?
C38 N4 C29 C30 73.8(4) . . . . ?
K1 N4 C29 C30 -45.7(4) . . . . ?
C31 O4 C30 C29 178.5(3) . . . . ?
K1 O4 C30 C29 -44.3(4) . . . . ?
N4 C29 C30 O4 61.4(4) . . . . ?
C30 O4 C31 C32 -174.7(3) . . . . ?
K1 O4 C31 C32 46.7(3) . . . . ?
C33 O3 C32 C31 -175.7(3) . . . . ?
K1 O3 C32 C31 49.2(3) . . . . ?
O4 C31 C32 O3 -63.9(4) . . . . ?
C32 O3 C33 C34 179.6(3) . . . . ?
K1 O3 C33 C34 -46.3(4) . . . . ?
C40 N3 C34 C33 -166.9(3) . . . . ?
C41 N3 C34 C33 72.8(4) . . . . ?
K1 N3 C34 C33 -47.0(4) . . . . ?
O3 C33 C34 N3 64.8(5) . . . . ?
C39 O1 C35 C36 177.6(3) . . . . ?
K1 O1 C35 C36 42.4(4) . . . . ?
C37 O6 C36 C35 -171.9(3) . . . . ?
K1 O6 C36 C35 53.2(3) . . . . ?
O1 C35 C36 O6 -63.7(4) . . . . ?
C36 O6 C37 C38 -174.2(3) . . . . ?
K1 O6 C37 C38 -41.4(3) . . . . ?
C29 N4 C38 C37 -171.4(3) . . . . ?
C28 N4 C38 C37 69.2(4) . . . . ?
K1 N4 C38 C37 -51.1(3) . . . . ?
O6 C37 C38 N4 64.0(4) . . . . ?
C35 O1 C39 C40 171.2(3) . . . . ?
K1 O1 C39 C40 -52.3(3) . . . . ?
C34 N3 C40 C39 76.6(4) . . . . ?
C41 N3 C40 C39 -163.0(3) . . . . ?
K1 N3 C40 C39 -42.3(4) . . . . ?
O1 C39 C40 N3 65.3(4) . . . . ?
C40 N3 C41 C42 70.4(4) . . . . ?
C34 N3 C41 C42 -169.5(3) . . . . ?
K1 N3 C41 C42 -50.5(4) . . . . ?
C25 O2 C42 C41 -171.3(3) . . . . ?
K1 O2 C42 C41 -40.3(4) . . . . ?
N3 C41 C42 O2 62.4(4) . . . . ?
C103 O7 C100 C101 -34.0(17) . . . . ?
O7 C100 C101 C102 10.3(18) . . . . ?
C100 C101 C102 C103 13.8(17) . . . . ?
C100 O7 C103 C102 42.9(17) . . . . ?
C101 C102 C103 O7 -32.9(16) . . . . ?
 
_refine_diff_density_max    1.943
_refine_diff_density_min   -2.710
_refine_diff_density_rms    0.131

_shelx_res_file
;

    nha-k2cryptUNR4.res created by SHELXL-2014/7


TITL nha-k2cryptUNR4 in Cc            New: C2/c
CELL  0.71073   19.9430   19.3480   25.9560    90.000   111.500    90.000
ZERR        4    0.0040    0.0040    0.0050     0.000     0.030     0.000
LATT   7
SYMM             - X ,              Y ,    0.50000 - Z
SFAC  C  H  K  N  O  U
UNIT 352 592 8 32 52 4
LIST 6 ! automatically inserted. Change 6 to 4 for CHECKCIF!!
temp -173.15
size 0.25 0.25 0.1

L.S. 25
FMAP 2
PLAN -20
ACTA
rigu O7 > C103
sadi O7 C100 O7 C103
sadi C100 C101 C101 C102 C102 C103
sadi O7 C102 O7 C101
sadi C100 C102 C103 C101
BOND $H
CONF
omit -18 14 27
OMIT -17 15 27
OMIT -11  1  7
OMIT -21  3 24

WGHT    0.000000   44.086304
FVAR       0.06406
U1    6    0.000000    0.055821    0.250000    10.50000    0.02266    0.02371 =
         0.01928    0.00000    0.00589    0.00000
K1    3    0.369041    0.115102    0.007658    11.00000    0.02030    0.01890 =
         0.02303   -0.00094    0.00574   -0.00067
O1    5    0.468753    0.025886    0.084793    11.00000    0.02186    0.02664 =
         0.03530    0.00449    0.00845    0.00504
O2    5    0.292657    0.141456    0.080784    11.00000    0.03314    0.02814 =
         0.02901    0.00191    0.01411    0.00126
O3    5    0.275752    0.019051   -0.066811    11.00000    0.02439    0.02322 =
         0.02803   -0.00018    0.00309   -0.00607
O4    5    0.306958    0.145938   -0.107016    11.00000    0.02765    0.02562 =
         0.02281   -0.00314    0.00756   -0.00473
O5    5    0.370610    0.245844    0.052709    11.00000    0.03078    0.02123 =
         0.03541   -0.00412    0.01537    0.00199
O6    5    0.519884    0.118605    0.023794    11.00000    0.01901    0.02970 =
         0.02953    0.00184    0.00494   -0.00199
N1    4   -0.040351    0.107154    0.175349    11.00000    0.02554    0.02741 =
         0.02405    0.00158    0.00943    0.00532
N2    4    0.084825   -0.002321    0.246156    11.00000    0.02587    0.02496 =
         0.02303   -0.00158    0.00630    0.00210
N3    4    0.313541   -0.002061    0.053484    11.00000    0.02532    0.02402 =
         0.03190    0.00391    0.00652    0.00061
N4    4    0.425517    0.232427   -0.036995    11.00000    0.02371    0.01898 =
         0.02546   -0.00132    0.00668   -0.00161
C1    1   -0.065731    0.125041    0.120452    11.00000    0.02088    0.01918 =
         0.02509    0.00177    0.00641   -0.00374
C2    1   -0.042597    0.089244    0.082074    11.00000    0.02068    0.02063 =
         0.02405    0.00043    0.00685   -0.00427
C3    1   -0.072744    0.105072    0.026109    11.00000    0.02924    0.02346 =
         0.02574    0.00004    0.00905   -0.00320
AFIX  43
H3    2   -0.057416    0.080144    0.000858    11.00000   -1.20000
AFIX   0
C4    1   -0.124432    0.156034    0.005962    11.00000    0.02600    0.02997 =
         0.02200    0.00539    0.00407   -0.00628
AFIX  43
H4    2   -0.144706    0.165665   -0.032580    11.00000   -1.20000
AFIX   0
C5    1   -0.146263    0.193018    0.043175    11.00000    0.02082    0.02172 =
         0.03456    0.00850    0.00660   -0.00222
AFIX  43
H5    2   -0.181326    0.228444    0.029562    11.00000   -1.20000
AFIX   0
C6    1   -0.118175    0.179470    0.099477    11.00000    0.02276    0.02014 =
         0.02882    0.00353    0.01207   -0.00148
C7    1    0.011588    0.030684    0.102795    11.00000    0.02746    0.02504 =
         0.02457    0.00020    0.00795    0.00089
AFIX  13
H7    2    0.032856    0.034634    0.144062    11.00000   -1.20000
AFIX   0
C8    1   -0.026848   -0.038924    0.089585    11.00000    0.03521    0.02273 =
         0.04054    0.00697    0.00982   -0.00191
AFIX 137
H8A   2   -0.054083   -0.042223    0.049661    11.00000   -1.50000
H8B   2   -0.059961   -0.043033    0.109515    11.00000   -1.50000
H8C   2    0.008805   -0.076241    0.101093    11.00000   -1.50000
AFIX   0
C9    1    0.073756    0.033864    0.082509    11.00000    0.03173    0.02873 =
         0.03573   -0.00084    0.01329    0.00200
AFIX 137
H9A   2    0.055146    0.030492    0.042023    11.00000   -1.50000
H9B   2    0.106865   -0.004595    0.098424    11.00000   -1.50000
H9C   2    0.099457    0.077750    0.093960    11.00000   -1.50000
AFIX   0
C10   1   -0.139583    0.220035    0.140747    11.00000    0.04416    0.02707 =
         0.04154    0.00651    0.02305    0.00873
AFIX  13
H10   2   -0.143648    0.186530    0.168793    11.00000   -1.20000
AFIX   0
C11   1   -0.079922    0.272211    0.171634    11.00000    0.06808    0.03801 =
         0.05002   -0.00964    0.02046    0.00693
AFIX 137
H11A  2   -0.074541    0.305911    0.145226    11.00000   -1.50000
H11B  2   -0.034299    0.247592    0.189483    11.00000   -1.50000
H11C  2   -0.093015    0.296286    0.199820    11.00000   -1.50000
AFIX   0
C12   1   -0.212234    0.256964    0.115406    11.00000    0.05250    0.04936 =
         0.06270    0.00963    0.03346    0.02276
AFIX 137
H12A  2   -0.209084    0.292451    0.089447    11.00000   -1.50000
H12B  2   -0.224536    0.278719    0.144884    11.00000   -1.50000
H12C  2   -0.249586    0.223359    0.095665    11.00000   -1.50000
AFIX   0
C13   1    0.141227   -0.026214    0.233845    11.00000    0.02347    0.02938 =
         0.01725    0.00468    0.00311    0.00576
C14   1    0.143061   -0.094949    0.214189    11.00000    0.03488    0.02863 =
         0.02025    0.00354    0.00673    0.00742
C15   1    0.201102   -0.115937    0.200721    11.00000    0.05115    0.03329 =
         0.03310    0.00186    0.01889    0.01390
AFIX  43
H15   2    0.201204   -0.161439    0.186997    11.00000   -1.20000
AFIX   0
C16   1    0.258709   -0.073035    0.206558    11.00000    0.04924    0.03674 =
         0.04492    0.00823    0.02963    0.01607
AFIX  43
H16   2    0.297565   -0.088503    0.196642    11.00000   -1.20000
AFIX   0
C17   1    0.258783   -0.006828    0.227205    11.00000    0.03588    0.03713 =
         0.03693    0.01130    0.01920    0.00580
AFIX  43
H17   2    0.298789    0.022579    0.232053    11.00000   -1.20000
AFIX   0
C18   1    0.202026    0.017641    0.240976    11.00000    0.03012    0.02976 =
         0.01945    0.00450    0.00798    0.00748
C19   1    0.083340   -0.144744    0.212354    11.00000    0.03831    0.02381 =
         0.02824   -0.00030    0.00166    0.00255
AFIX  13
H19   2    0.037502   -0.117684    0.201361    11.00000   -1.20000
AFIX   0
C20   1    0.071242   -0.204328    0.171002    11.00000    0.05780    0.03276 =
         0.04813   -0.00866    0.00081    0.00620
AFIX 137
H20A  2    0.066811   -0.185829    0.134749    11.00000   -1.50000
H20B  2    0.026963   -0.229035    0.167718    11.00000   -1.50000
H20C  2    0.112219   -0.236216    0.184101    11.00000   -1.50000
AFIX   0
C21   1    0.098870   -0.173114    0.270876    11.00000    0.04185    0.03956 =
         0.04089    0.01024    0.00430   -0.00514
AFIX 137
H21A  2    0.060426   -0.205107    0.270126    11.00000   -1.50000
H21B  2    0.100974   -0.134758    0.296082    11.00000   -1.50000
H21C  2    0.145116   -0.197577    0.283754    11.00000   -1.50000
AFIX   0
C22   1    0.202692    0.090069    0.263964    11.00000    0.02589    0.02893 =
         0.02327    0.00108    0.00417   -0.00156
AFIX  13
H22   2    0.176346    0.087572    0.290102    11.00000   -1.20000
AFIX   0
C23   1    0.277745    0.117413    0.296816    11.00000    0.03472    0.04987 =
         0.05415   -0.00982    0.00275   -0.00156
AFIX 137
H23A  2    0.303128    0.126814    0.271603    11.00000   -1.50000
H23B  2    0.304580    0.082873    0.324237    11.00000   -1.50000
H23C  2    0.273903    0.160177    0.315780    11.00000   -1.50000
AFIX   0
C24   1    0.162139    0.141446    0.218838    11.00000    0.04304    0.02604 =
         0.03158    0.00115    0.01258    0.00217
AFIX 137
H24A  2    0.186400    0.145490    0.192268    11.00000   -1.50000
H24B  2    0.161273    0.186699    0.235543    11.00000   -1.50000
H24C  2    0.112651    0.125206    0.199666    11.00000   -1.50000
AFIX   0
C25   1    0.323360    0.198067    0.116551    11.00000    0.03366    0.03959 =
         0.02995   -0.00613    0.01286    0.00379
AFIX  23
H25A  2    0.372924    0.186352    0.141603    11.00000   -1.20000
H25B  2    0.294348    0.208310    0.139467    11.00000   -1.20000
AFIX   0
C26   1    0.324894    0.259622    0.082493    11.00000    0.03494    0.03074 =
         0.03477   -0.01049    0.01673   -0.00006
AFIX  23
H26A  2    0.275576    0.270071    0.056312    11.00000   -1.20000
H26B  2    0.342984    0.300286    0.106790    11.00000   -1.20000
AFIX   0
C27   1    0.375709    0.303966    0.020937    11.00000    0.03017    0.01958 =
         0.04086   -0.00391    0.01304   -0.00361
AFIX  23
H27A  2    0.385032    0.346186    0.044054    11.00000   -1.20000
H27B  2    0.329733    0.310274   -0.010782    11.00000   -1.20000
AFIX   0
C28   1    0.436400    0.292689    0.000076    11.00000    0.02921    0.02184 =
         0.03579   -0.00347    0.01044   -0.00716
AFIX  23
H28A  2    0.441621    0.334612   -0.020000    11.00000   -1.20000
H28B  2    0.481913    0.286391    0.032235    11.00000   -1.20000
AFIX   0
C29   1    0.374490    0.251025   -0.092458    11.00000    0.03362    0.02494 =
         0.03177    0.00401    0.00782   -0.00458
AFIX  23
H29A  2    0.398877    0.282663   -0.109976    11.00000   -1.20000
H29B  2    0.333582    0.276464   -0.088487    11.00000   -1.20000
AFIX   0
C30   1    0.345342    0.190161   -0.130315    11.00000    0.03286    0.03520 =
         0.02434    0.00344    0.00781   -0.00540
AFIX  23
H30A  2    0.312814    0.206553   -0.167129    11.00000   -1.20000
H30B  2    0.385544    0.164443   -0.135158    11.00000   -1.20000
AFIX   0
C31   1    0.276839    0.088431   -0.142371    11.00000    0.02594    0.02966 =
         0.02166   -0.00627    0.00365    0.00192
AFIX  23
H31A  2    0.315951    0.059140   -0.145368    11.00000   -1.20000
H31B  2    0.247126    0.105035   -0.179900    11.00000   -1.20000
AFIX   0
C32   1    0.231251    0.047056   -0.119017    11.00000    0.02462    0.02472 =
         0.02618   -0.00397    0.00067   -0.00174
AFIX  23
H32A  2    0.193614    0.076910   -0.114265    11.00000   -1.20000
H32B  2    0.207141    0.009166   -0.144780    11.00000   -1.20000
AFIX   0
C33   1    0.234664   -0.024946   -0.045328    11.00000    0.03393    0.03448 =
         0.04287    0.00334    0.00367   -0.01625
AFIX  23
H33A  2    0.213201   -0.063123   -0.071608    11.00000   -1.20000
H33B  2    0.195084    0.001651   -0.040312    11.00000   -1.20000
AFIX   0
C34   1    0.283581   -0.053820    0.009444    11.00000    0.03976    0.02624 =
         0.04185    0.00509    0.00729   -0.00987
AFIX  23
H34A  2    0.256331   -0.088381    0.022058    11.00000   -1.20000
H34B  2    0.323989   -0.078239    0.003822    11.00000   -1.20000
AFIX   0
C35   1    0.539474    0.021210    0.083271    11.00000    0.01985    0.04193 =
         0.03495    0.00757    0.00747    0.00997
AFIX  23
H35A  2    0.538675   -0.008928    0.052228    11.00000   -1.20000
H35B  2    0.572780    0.000597    0.118180    11.00000   -1.20000
AFIX   0
C36   1    0.565140    0.091729    0.075937    11.00000    0.01927    0.04575 =
         0.02676    0.00011    0.00363    0.00277
AFIX  23
H36A  2    0.563821    0.122513    0.106017    11.00000   -1.20000
H36B  2    0.615490    0.089261    0.077632    11.00000   -1.20000
AFIX   0
C37   1    0.547825    0.181951    0.011179    11.00000    0.02227    0.02965 =
         0.03636   -0.00423    0.01028   -0.00417
AFIX  23
H37A  2    0.594220    0.173075    0.006611    11.00000   -1.20000
H37B  2    0.556641    0.215091    0.042032    11.00000   -1.20000
AFIX   0
C38   1    0.494869    0.212138   -0.041159    11.00000    0.02679    0.02636 =
         0.03517   -0.00142    0.01428   -0.00369
AFIX  23
H38A  2    0.516778    0.253302   -0.051358    11.00000   -1.20000
H38B  2    0.485353    0.177831   -0.071307    11.00000   -1.20000
AFIX   0
C39   1    0.441333   -0.040802    0.089509    11.00000    0.03278    0.02144 =
         0.03436    0.00369    0.00838    0.00493
AFIX  23
H39A  2    0.477150   -0.066462    0.120411    11.00000   -1.20000
H39B  2    0.432292   -0.067230    0.054949    11.00000   -1.20000
AFIX   0
C40   1    0.372363   -0.033336    0.099955    11.00000    0.03269    0.02540 =
         0.03510    0.00865    0.01179    0.00175
AFIX  23
H40A  2    0.356877   -0.079555    0.107645    11.00000   -1.20000
H40B  2    0.381605   -0.004499    0.133364    11.00000   -1.20000
AFIX   0
C41   1    0.256741    0.022431    0.072802    11.00000    0.02769    0.03649 =
         0.05036    0.01334    0.01731   -0.00147
AFIX  23
H41A  2    0.243640   -0.015656    0.092798    11.00000   -1.20000
H41B  2    0.213364    0.034181    0.040179    11.00000   -1.20000
AFIX   0
C42   1    0.278075    0.084024    0.110005    11.00000    0.03485    0.03812 =
         0.04232    0.01388    0.02441    0.00738
AFIX  23
H42A  2    0.238732    0.096170    0.123046    11.00000   -1.20000
H42B  2    0.321575    0.073062    0.142772    11.00000   -1.20000
AFIX   0

part -1
O7    5    0.431444    0.061976    0.247910    10.50000    0.08261    0.17857 =
         0.16010   -0.01618    0.05788   -0.02253
C100  1    0.473060    0.003075    0.253758    10.50000    0.06732    0.17631 =
         0.05682   -0.00261    0.02333   -0.02228
AFIX  23
H10A  2    0.444101   -0.035284    0.231159    10.50000   -1.20000
H10B  2    0.493572   -0.011725    0.292972    10.50000   -1.20000
AFIX   0
C101  1    0.532736    0.024474    0.233203    10.50000    0.04351    0.14017 =
         0.06833   -0.02504    0.00978   -0.04358
AFIX  23
H10C  2    0.580703    0.011611    0.260385    10.50000   -1.20000
H10D  2    0.525988    0.002183    0.197311    10.50000   -1.20000
AFIX   0
C102  1    0.525493    0.102593    0.226827    10.50000    0.09083    0.14902 =
         0.12079   -0.01192    0.05975   -0.01779
AFIX  23
H10E  2    0.503649    0.116004    0.187345    10.50000   -1.20000
H10F  2    0.572892    0.125594    0.243729    10.50000   -1.20000
AFIX   0
C103  1    0.475821    0.120706    0.257876    10.50000    0.06072    0.16327 =
         0.07077   -0.00499    0.01247    0.00095
AFIX  23
H10G  2    0.503369    0.127169    0.297941    10.50000   -1.20000
H10H  2    0.447463    0.162958    0.242689    10.50000   -1.20000
part 0
AFIX   0
HKLF 4

REM  nha-k2cryptUNR4 in Cc            New: C2/c
REM R1 =  0.0468 for    9517 Fo > 4sig(Fo)  and  0.0772 for all   12428 data
REM    536 parameters refined using     36 restraints

END

WGHT      0.0000     44.1007

REM Highest difference peak  1.943,  deepest hole -2.710,  1-sigma level  0.131
Q1    1  -0.0278  0.0564  0.2039  11.00000  0.05    1.94
Q2    1   0.0610  0.0554  0.2357  11.00000  0.05    1.30
Q3    1   0.0314  0.0721  0.2131  11.00000  0.05    1.17
Q4    1   0.0790  0.0776  0.2148  11.00000  0.05    1.08
Q5    1  -0.0168  0.1078  0.2149  11.00000  0.05    1.02
Q6    1   0.0000  0.1367  0.2500  10.50000  0.05    0.75
Q7    1   0.0146 -0.0011  0.2272  11.00000  0.05    0.71
Q8    1  -0.0401  0.0614  0.1643  11.00000  0.05    0.70
Q9    1  -0.0659  0.0537  0.1769  11.00000  0.05    0.68
Q10   1   0.0000 -0.0295  0.2500  10.50000  0.05    0.68
Q11   1   0.0758  0.0344  0.2170  11.00000  0.05    0.68
Q12   1  -0.0374  0.1082  0.2435  11.00000  0.05    0.63
Q13   1   0.0000  0.3939  0.2500  10.50000  0.05    0.62
Q14   1   0.0503  0.1274  0.2148  11.00000  0.05    0.62
Q15   1  -0.0705  0.0279  0.2440  11.00000  0.05    0.61
Q16   1  -0.0577  0.1088  0.1426  11.00000  0.05    0.61
Q17   1   0.0173  0.1565  0.2296  11.00000  0.05    0.60
Q18   1  -0.0165 -0.0039  0.0920  11.00000  0.05    0.57
Q19   1  -0.1084  0.0523  0.2216  11.00000  0.05    0.57
Q20   1   0.0931  0.0710  0.1837  11.00000  0.05    0.57
;
_shelx_res_checksum   29408

_shelx_hkl_file
;
   0   0   1   -0.40    0.20
   0   0   1    0.70    0.60
   0   0   7   -0.40    1.10
   0   0   8  948.20   32.80
   0   0   9    1.20    1.30
   0   0  10    4.10    1.40
   0   0  11    0.30    1.20
   0   0  11   -0.30    1.20
   0   0  12  566.60   20.20
   0   0  12  546.30   21.20
   0   0  13   -1.40    1.70
   0   0  13   -0.10    1.50
   0   0  14  136.30    5.80
   0   0  14  126.40    6.10
   0   0  15   -3.10    2.00
   0   0  16  148.30    6.40
   0   0 -16  152.30    6.60
   0   0  17   -1.50    1.80
   0   0 -17    0.10    2.00
   0   0  18  104.00    4.80
   0   0 -18  104.40    5.00
   0   0  19    0.10    2.20
   0   0 -19    1.00    2.10
   0   0  20  136.60    6.70
   0   0 -20  131.70    6.30
   0   0  21   -1.50    2.80
   0   0 -21   -2.40    2.50
   0   0  22   28.00    3.60
   0   0 -22   30.90    3.00
   0   0  23   -5.90    2.80
   0   0 -23   -3.30    4.80
   0   0 -23   12.10    6.50
   0   0  24  177.50    8.50
   0   0 -24  187.90    9.20
   0   0 -24  196.20   13.40
   0   0  25   -3.30    3.20
   0   0 -25   -3.50    3.80
   0   0 -25    0.70    3.20
   0   0 -26   37.90    4.60
   0   0 -26   41.40    4.40
   0   0 -27   -5.40    3.80
   0   0 -27   -1.40    3.30
   0   0 -28   68.20    5.90
   0   0 -29   -0.80    5.20
   0   0 -30   53.70    5.10
   0   0 -31   -0.80    3.20
   0   0 -32   19.30    6.90
   0   0 -33   -1.90    3.80
   0  -2   0 1171.00   38.00
   0   2  -1  342.90   11.80
   0  -2  -1  347.10   12.10
   0   2  -2  737.40   24.50
   0  -2  -2  727.70   24.00
   0   2  -3   16.40    1.60
   0  -2  -3   13.40    1.40
   0   2  -4  437.30   15.10
   0  -2  -4  435.70   14.70
   0  -2   4  419.40   14.80
   0   2   5  747.00   24.90
   0   2  -5  714.60   25.70
   0  -2  -5  711.30   24.80
   0  -2   5  731.00   24.50
   0   2   6 2193.60   71.40
   0   2  -6 2162.90   70.80
   0   2  -6 2205.80   72.90
   0  -2  -6 2234.50   71.00
   0  -2   6 2200.50   71.60
   0   2   7  120.70    5.00
   0   2  -7  119.50    4.90
   0   2  -7  124.90    4.90
   0  -2  -7  116.90    5.20
   0  -2  -7  122.30    5.50
   0  -2   7  120.90    5.10
   0   2   8  183.00    7.30
   0   2  -8  185.20    7.20
   0   2  -8  188.70    7.40
   0  -2  -8  183.00    6.90
   0  -2  -8  183.20    7.70
   0  -2   8  183.00    7.40
   0   2   9  190.00    7.50
   0   2  -9  183.60    7.50
   0   2  -9  179.80    7.40
   0  -2  -9  168.60    7.50
   0  -2   9  189.90    7.90
   0   2  10  143.80    5.70
   0   2 -10  137.50    5.90
   0   2 -10  144.90    6.20
   0  -2 -10  140.00    6.20
   0  -2  10  137.20    6.10
   0  -2  10  139.20    6.90
   0   2  11  117.10    5.10
   0   2 -11  115.00    5.10
   0   2 -11  117.50    5.00
   0  -2 -11  118.60    5.60
   0  -2  11  116.00    5.20
   0  -2  11  112.80    5.50
   0   2  12  478.60   17.60
   0   2 -12  478.70   17.90
   0   2 -12  473.50   17.50
   0  -2 -12  492.70   19.20
   0  -2  12  491.10   18.10
   0  -2  12  471.10   18.60
   0   2  13  441.80   16.60
   0   2 -13  431.40   16.90
   0   2 -13  423.70   16.00
   0  -2 -13  429.20   17.40
   0  -2  13  474.90   19.30
   0  -2  13  424.30   18.50
   0   2  14   41.10    2.60
   0   2 -14   44.30    4.40
   0  -2 -14   37.70    2.80
   0  -2 -14   43.40    3.20
   0  -2  14   43.60    2.70
   0  -2  14   41.70    2.70
   0   2  15    9.80    2.30
   0   2 -15    9.60    1.70
   0  -2 -15    7.40    1.90
   0  -2 -15   10.50    1.90
   0  -2  15   15.40    2.70
   0  -2  15    9.80    1.70
   0   2  16  119.60    5.30
   0   2 -16  119.40    5.60
   0   2 -16  109.00    5.40
   0  -2 -16  118.30    5.30
   0  -2  16  118.10    5.40
   0  -2  16  122.00    5.70
   0   2  17  232.90    9.30
   0   2 -17  221.60    9.20
   0   2 -17  220.50    9.60
   0  -2 -17  212.00    8.90
   0  -2  17  216.50    8.90
   0  -2  17  219.80   10.10
   0   2  18  151.00    6.20
   0   2 -18  142.40    6.70
   0   2 -18  148.60    7.00
   0  -2 -18  143.90    6.60
   0  -2  18  147.70    6.60
   0  -2  18  147.70    6.50
   0   2  19    9.00    2.50
   0   2 -19    9.20    2.40
   0   2 -19    6.80    2.00
   0  -2 -19    4.50    2.30
   0  -2  19    1.80    2.30
   0  -2  19    7.20    2.10
   0   2  20   71.90    4.30
   0   2 -20   68.50    4.30
   0   2 -20   65.00    4.10
   0  -2 -20   76.00    5.80
   0  -2  20   76.30    4.60
   0  -2  20   70.10    3.70
   0   2  21   39.90    3.90
   0   2 -21   40.80    3.60
   0   2 -21   42.30    3.10
   0  -2 -21   37.50    3.40
   0  -2  21   48.30    4.50
   0  -2  21   42.80    3.10
   0   2  22   77.40    4.30
   0   2 -22   78.20    4.80
   0   2 -22   81.00    4.70
   0  -2 -22   78.70    4.70
   0  -2  22   73.70    5.10
   0   2  23   22.50    3.30
   0   2 -23   25.20    3.50
   0   2 -23   31.10    4.60
   0  -2 -23   23.90    4.10
   0  -2  23   23.00    3.20
   0   2  24   27.70    3.40
   0   2 -24   31.50    3.50
   0   2 -24   38.30    3.80
   0  -2 -24   33.80    4.70
   0  -2  24   33.40    3.80
   0   2  25   38.10    4.40
   0   2 -25   48.00    3.80
   0   2 -25   47.30    3.70
   0  -2 -25   85.80   10.30
   0  -2  25   34.70    3.90
   0   2 -26   40.20    4.10
   0   2 -26   35.50    4.60
   0  -2 -26   35.20    4.40
   0   2 -27    4.00    3.40
   0  -2 -27    4.30    3.30
   0   2 -28   17.30    3.70
   0  -2 -28   16.40    3.70
   0   2 -29   48.60    5.10
   0  -2 -29   51.90    5.10
   0   2 -30   31.60    5.30
   0  -2 -30   28.40    5.50
   0   2 -31    4.80    4.10
   0  -2 -31    4.80    3.80
   0   2 -32   12.80    4.10
   0  -2 -32    9.30    4.00
   0  -2 -33   44.40   10.10
   0   4   0  224.60    8.00
   0   4   0  231.40    8.60
   0   4   1  667.40   22.40
   0   4  -1  641.50   21.80
   0  -4  -1  658.40   22.20
   0   4   2   54.60    2.60
   0   4  -2   37.90    2.20
   0  -4  -2   41.40    2.10
   0  -4   2   53.80    2.60
   0   4   3  361.60   12.60
   0   4  -3  355.60   12.70
   0  -4  -3  350.00   12.80
   0  -4   3  380.10   13.30
   0   4   4  111.00    4.60
   0   4  -4  118.70    5.30
   0  -4  -4  108.80    4.50
   0  -4   4  118.70    4.40
   0   4   5  586.00   20.80
   0   4  -5  601.00   20.30
   0  -4  -5  588.40   20.60
   0  -4   5  595.20   20.10
   0   4   6  993.60   32.90
   0   4  -6  981.90   32.80
   0  -4  -6  986.40   33.50
   0  -4   6  968.40   32.90
   0   4   7  171.40    6.60
   0   4  -7  170.10    6.80
   0  -4  -7  175.50    6.90
   0  -4   7  166.20    6.70
   0  -4   7  163.10    6.70
   0   4   8   50.70    2.70
   0   4  -8   48.00    2.70
   0  -4  -8   48.20    2.60
   0  -4   8   47.90    2.80
   0   4   9  253.40    9.60
   0   4  -9  249.60    9.70
   0  -4  -9  238.00    9.30
   0  -4   9  263.20   10.10
   0   4  10  594.40   21.70
   0   4 -10  590.60   21.60
   0  -4 -10  580.20   20.90
   0  -4  10  625.30   21.70
   0   4  11  401.20   14.70
   0   4 -11  388.30   14.50
   0  -4  11  408.20   15.10
   0   4  12   25.00    2.10
   0   4 -12   24.80    2.20
   0  -4 -12   28.00    2.30
   0  -4  12   26.80    2.20
   0   4  13  338.20   12.00
   0   4 -13  329.50   12.40
   0  -4 -13  335.20   12.40
   0  -4 -13  341.60   14.00
   0  -4  13  341.20   13.30
   0   4  14  118.90    7.00
   0   4 -14  105.20    5.20
   0  -4 -14  110.70    5.20
   0  -4 -14  117.80    6.00
   0  -4  14  111.40    4.90
   0   4  15  178.10    7.40
   0   4 -15  162.70    7.20
   0  -4 -15  169.90    6.80
   0  -4 -15  170.80    8.20
   0  -4  15  164.00    7.30
   0  -4  15  174.90    8.00
   0   4  16    2.20    2.00
   0   4 -16   -0.50    2.20
   0  -4 -16   -0.70    2.20
   0  -4 -16    2.30    1.50
   0  -4  16    2.00    2.10
   0  -4  16    2.40    2.20
   0   4  17  147.60    6.40
   0  -4 -17  142.80    6.30
   0  -4 -17  141.60    6.80
   0  -4  17  140.30    6.60
   0  -4  17  146.30    6.70
   0   4  18   15.10    2.60
   0  -4 -18   15.30    2.20
   0  -4 -18   16.50    2.20
   0  -4  18   14.50    2.50
   0  -4  18   16.40    2.20
   0   4  19   88.30    4.80
   0   4 -19   96.30    5.40
   0  -4 -19   93.70    6.00
   0  -4 -19   86.90    5.20
   0  -4  19   99.80    5.10
   0  -4  19   92.80    5.80
   0   4  20   11.80    2.70
   0   4 -20   11.90    2.70
   0  -4 -20   11.00    2.40
   0  -4  20   13.00    2.60
   0  -4  20   14.10    2.40
   0   4  21   37.30    3.50
   0   4 -21   43.80    3.70
   0  -4 -21   34.30    3.40
   0  -4  21   40.90    3.50
   0  -4  21   40.30    3.40
   0   4  22    0.40    2.70
   0   4 -22    1.30    2.90
   0  -4 -22    4.10    2.60
   0  -4  22    5.80    3.20
   0  -4  22    2.80    2.50
   0   4  23  116.30    6.10
   0   4 -23  119.20    6.80
   0  -4 -23  117.30    6.40
   0  -4  23  109.90    6.00
   0  -4  23  121.20    6.40
   0   4  24    0.30    2.90
   0   4 -24    3.90    3.00
   0  -4 -24    0.10    3.00
   0  -4  24    0.80    3.30
   0  -4  24    2.40    2.50
   0   4  25   35.70    4.10
   0   4 -25   52.40    6.00
   0  -4 -25   47.10    5.00
   0  -4  25   49.80    3.60
   0   4 -26    3.50    3.20
   0  -4 -26    4.80    3.50
   0   4 -27   43.60    4.80
   0  -4 -27   44.10    4.90
   0   4 -28    4.00    4.00
   0  -4 -28   -2.00    3.70
   0   4 -29   38.50    5.00
   0  -4 -29   41.90    5.20
   0   4 -30   -1.00    3.70
   0  -4 -30    7.90    4.70
   0   4 -31   15.90    4.50
   0  -4 -31   16.70    4.20
   0   4 -32    3.90    6.30
   0  -4 -32    1.90    3.90
   0   6   0   37.20    2.10
   0   6   0   40.10    2.10
   0   6   1   16.30    1.40
   0   6  -1   15.70    1.50
   0   6  -1   15.70    1.50
   0  -6  -1   15.10    1.40
   0   6   2   33.40    2.00
   0   6  -2   30.30    2.00
   0  -6  -2   31.30    2.10
   0  -6   2   33.00    2.10
   0   6   3  319.90   12.60
   0   6  -3  311.50   11.40
   0  -6  -3  315.60   12.40
   0  -6   3  319.90   11.60
   0   6   4    4.70    1.20
   0   6  -4    3.20    1.20
   0  -6  -4    5.50    1.40
   0  -6   4    5.60    1.20
   0   6   5  102.40    4.50
   0   6  -5  103.60    4.50
   0  -6  -5  101.90    4.40
   0  -6   5  106.60    4.70
   0   6   6   23.00    1.70
   0   6  -6   23.50    1.80
   0  -6  -6   24.50    1.90
   0  -6   6   23.10    1.90
   0   6   7  481.70   17.70
   0   6  -7  472.60   16.70
   0  -6  -7  469.90   17.10
   0  -6   7  488.00   17.10
   0   6   8   10.40    1.40
   0   6  -8    9.00    1.50
   0  -6  -8    7.20    1.20
   0  -6   8    8.90    1.60
   0   6   9   37.70    2.20
   0   6  -9   38.00    2.50
   0  -6  -9   33.80    2.20
   0  -6   9   34.50    2.30
   0  -6   9   35.60    2.20
   0   6  10    7.40    1.80
   0   6 -10   11.40    1.90
   0  -6 -10    9.90    1.50
   0  -6  10   11.90    1.80
   0  -6  10   11.50    1.50
   0   6  11  300.60   11.00
   0   6 -11  293.20   11.20
   0  -6 -11  289.70   11.00
   0  -6  11  278.60   10.60
   0   6  12   13.90    1.80
   0   6 -12   13.50    2.50
   0  -6 -12   13.90    1.70
   0  -6  12   17.40    2.30
   0   6  13   19.20    3.60
   0   6 -13   12.00    2.20
   0  -6  13   14.20    2.00
   0   6  14   33.50    2.90
   0   6 -14   26.40    2.80
   0  -6  14   30.80    2.60
   0   6  15  206.80    8.00
   0   6 -15  196.70    8.40
   0  -6 -15  197.20    7.80
   0  -6 -15  191.70    8.30
   0  -6  15  194.30    8.30
   0   6  16   17.90    2.60
   0   6 -16   17.90    2.60
   0  -6 -16   18.10    2.10
   0  -6 -16   18.30    2.00
   0  -6  16   22.10    2.60
   0   6  17   25.30    2.60
   0   6 -17   24.30    2.80
   0  -6 -17   19.70    2.70
   0  -6 -17   24.70    2.50
   0  -6  17   25.80    3.50
   0   6  18   45.10    3.20
   0   6 -18   45.00    3.70
   0  -6 -18   42.10    3.50
   0  -6 -18   44.60    3.10
   0  -6  18   42.00    3.50
   0  -6  18   43.60    3.70
   0   6  19  247.70   10.10
   0   6 -19  263.50   12.50
   0  -6 -19  245.00    9.90
   0  -6 -19  232.90   10.60
   0  -6  19  248.70   11.10
   0  -6  19  238.40   11.10
   0   6  20   16.90    2.90
   0   6 -20   23.50    3.50
   0  -6 -20   20.10    2.80
   0  -6 -20   19.20    2.50
   0  -6  20   18.30    3.50
   0  -6  20   21.60    2.80
   0   6  21   90.50    5.00
   0   6 -21   83.00    5.60
   0  -6 -21   84.60    5.30
   0  -6 -21   83.70    5.20
   0  -6  21   92.40    5.20
   0  -6  21   94.70    5.00
   0   6  22   22.40    3.80
   0   6 -22   26.20    3.60
   0  -6 -22   19.70    3.90
   0  -6 -22   18.30    2.50
   0  -6  22   13.40    3.50
   0  -6  22   19.30    2.90
   0   6  23   60.00    4.70
   0   6 -23   71.60    4.90
   0  -6 -23   61.80    4.30
   0  -6 -23   59.70    4.30
   0  -6  23   63.50    5.20
   0  -6  23   65.70    4.30
   0   6  24   30.80    4.70
   0   6 -24   28.20    3.70
   0  -6 -24   30.10    3.70
   0  -6  24   30.50    3.30
   0   6 -25   14.00    4.30
   0  -6 -25   17.90    3.60
   0  -6  25   18.60    3.20
   0   6 -26   13.20    4.10
   0  -6 -26    7.50    3.40
   0  -6  26   11.60    3.40
   0   6 -27   66.30    5.20
   0  -6 -27   65.20    5.30
   0   6 -28   12.60    3.90
   0  -6 -28   13.00    3.80
   0   6 -29   26.40    5.00
   0  -6 -29   31.90    4.60
   0   6 -30   12.60    4.20
   0  -6 -30   15.40    4.90
   0   6 -31   27.40    4.80
   0  -6 -31   25.80    4.50
   0  -6 -32    0.90    4.50
   0   8   0   20.10    1.90
   0   8   0   22.70    2.00
   0   8   1   18.50    1.80
   0   8  -1   16.30    2.20
   0   8  -1   16.10    1.90
   0  -8  -1   15.60    1.70
   0   8   2  250.10   10.00
   0   8  -2  236.10    9.00
   0   8  -2  237.70    9.80
   0  -8  -2  238.40    9.10
   0   8   3   46.30    2.40
   0   8  -3   40.40    2.40
   0  -8  -3   43.60    2.70
   0  -8   3   44.10    2.70
   0   8   4   17.00    1.70
   0   8  -4   18.10    1.60
   0  -8  -4   19.00    1.80
   0  -8   4   21.10    1.70
   0   8   5   33.10    2.10
   0   8  -5   31.00    2.00
   0  -8  -5   30.80    2.00
   0  -8   5   33.80    2.20
   0   8   6   54.20    3.00
   0   8  -6   46.90    2.90
   0  -8  -6   47.50    2.50
   0  -8   6   53.70    2.80
   0   8   7    4.10    1.40
   0   8  -7    4.30    1.70
   0  -8  -7    6.00    1.80
   0  -8   7    3.90    1.70
   0   8   8  352.70   13.30
   0   8  -8  374.00   12.80
   0  -8  -8  366.60   13.20
   0  -8   8  357.40   13.40
   0   8   9    0.60    1.50
   0   8  -9    2.70    1.70
   0  -8  -9    3.60    1.90
   0  -8   9    2.70    1.50
   0   8  10  136.90    5.90
   0   8 -10  140.10    5.70
   0  -8 -10  145.00    6.30
   0  -8  10  143.20    5.90
   0   8  11   48.70    4.60
   0   8 -11   45.40    4.70
   0  -8  11   48.90    3.00
   0  -8  11   47.80    2.80
   0   8  12   89.90    4.80
   0   8 -12   85.90    4.10
   0  -8 -12   76.70    3.50
   0  -8  12   81.50    4.10
   0  -8  12   87.60    3.90
   0   8  13    6.40    2.20
   0   8 -13    8.90    2.10
   0  -8  13    3.00    1.80
   0   8  14  125.20    5.50
   0   8 -14  130.00    6.20
   0  -8  14  147.10    6.30
   0   8  15    7.10    4.30
   0   8 -15    1.70    2.10
   0  -8  15    2.00    2.10
   0   8  16   69.40    3.70
   0   8 -16   58.50    4.00
   0  -8 -16   59.30    3.70
   0  -8  16   62.70    5.20
   0   8  17    5.40    2.50
   0   8 -17   10.80    2.70
   0  -8 -17    8.60    2.40
   0  -8 -17    5.70    1.90
   0  -8  17    7.30    2.70
   0   8  18   87.90    4.90
   0   8 -18   92.10    5.50
   0  -8 -18   84.90    4.70
   0  -8 -18   85.00    4.90
   0  -8  18   96.30    5.30
   0   8  19   45.50    3.90
   0   8 -19   51.60    4.00
   0  -8 -19   48.00    3.30
   0  -8 -19   49.80    3.40
   0  -8  19   48.90    4.00
   0   8  20   58.60    4.10
   0   8 -20   54.70    4.50
   0  -8 -20   56.00    3.90
   0  -8 -20   54.90    3.90
   0  -8  20   84.60    9.10
   0   8  21   -3.70    2.90
   0   8 -21   -3.00    3.10
   0  -8 -21    0.20    2.70
   0  -8 -21    0.20    2.30
   0  -8  21   -3.00    2.90
   0  -8  21   -2.60    3.10
   0   8  22   42.50    3.90
   0   8 -22   55.20    5.70
   0  -8 -22   44.20    3.90
   0  -8 -22   46.10    3.30
   0  -8  22   47.30    4.60
   0  -8  22   49.90    4.50
   0   8  23   17.60    3.70
   0   8 -23   39.40    6.30
   0  -8 -23   26.00    3.70
   0  -8 -23   28.60    3.20
   0  -8  23   29.10    3.50
   0   8  24   21.70    3.80
   0   8 -24   38.10    4.60
   0  -8 -24   34.50    4.10
   0  -8 -24   36.30    3.30
   0  -8  24   31.70    3.70
   0   8 -25   18.30    4.20
   0  -8 -25   18.10    4.90
   0  -8  25   17.20    3.30
   0   8 -26   30.50    4.10
   0  -8 -26   41.80    4.40
   0  -8  26   37.00    3.70
   0   8 -27    2.90    3.50
   0  -8 -27    2.80    3.30
   0   8 -28   24.30    4.50
   0  -8 -28   25.40    4.00
   0   8 -29    6.40    4.40
   0  -8 -29   15.80    6.00
   0   8 -30    9.30    4.10
   0  -8 -30   20.80    4.80
   0  -8 -31   -0.30    4.40
   0  -8 -32   21.50    4.50
   0  10   0    5.90    1.60
   0  10   0    4.00    1.50
   0  10   1    6.70    1.80
   0  10   1    2.00    1.50
   0  10  -1    3.60    2.10
   0  10  -1    3.30    1.50
   0  10   2  123.60    6.00
   0  10  -2  122.50    5.30
   0  10  -2  128.90    5.70
   0 -10  -2  123.40    5.10
   0  10   3   28.60    2.40
   0  10  -3   29.00    2.60
   0  10  -3   28.60    2.50
   0 -10  -3   28.60    2.20
   0  10   4    3.80    1.60
   0  10  -4    7.70    1.90
   0 -10  -4    4.90    1.70
   0 -10   4    6.00    1.80
   0  10   5   17.20    2.10
   0  10  -5   16.70    2.20
   0 -10  -5   22.50    2.80
   0 -10   5   19.70    2.80
   0  10   6  463.30   16.20
   0  10  -6  451.70   16.40
   0 -10  -6  451.50   17.20
   0 -10   6  468.60   16.50
   0  10   7   18.30    2.00
   0  10  -7   16.20    2.10
   0 -10  -7   20.40    2.10
   0 -10   7   23.60    2.20
   0  10   8   54.80    3.40
   0  10  -8   50.30    3.50
   0 -10  -8   53.40    3.40
   0 -10   8   59.20    3.10
   0  10   9    0.50    2.80
   0  10  -9   -1.30    1.90
   0 -10  -9    0.40    1.60
   0 -10   9    2.30    1.90
   0  10  10   26.40    2.50
   0  10 -10   27.30    2.40
   0 -10 -10   31.00    2.80
   0 -10  10   30.00    2.70
   0  10  11   40.20    2.70
   0  10 -11   37.70    2.90
   0 -10 -11   36.70    2.60
   0 -10  11   44.10    3.00
   0  10  12   90.50    4.40
   0  10 -12   89.80    4.90
   0 -10 -12   88.90    4.50
   0 -10  12   90.30    5.00
   0  10  13   24.90    2.40
   0  10 -13   22.40    2.80
   0 -10  13   21.80    3.90
   0 -10  13   23.20    2.10
   0  10  14  111.20    5.00
   0  10 -14  110.00    5.10
   0 -10  14  111.50    5.60
   0  10  15   69.60    4.00
   0  10 -15   65.50    4.20
   0 -10 -15   65.60    3.80
   0 -10  15   68.70    4.00
   0  10  16   26.70    2.90
   0  10 -16   22.80    3.30
   0 -10 -16   21.00    2.80
   0 -10  16   24.40    3.40
   0  10  17    4.70    2.40
   0  10 -17    3.20    2.70
   0 -10 -17    1.70    2.30
   0 -10  17   -1.90    2.60
   0  10  18   67.20    3.90
   0  10 -18   71.10    4.60
   0 -10 -18   64.70    4.40
   0 -10  18   67.60    4.50
   0  10  19   17.00    2.60
   0  10 -19   21.20    3.50
   0 -10 -19   14.40    2.80
   0 -10 -19   18.30    2.80
   0 -10  19   13.60    3.10
   0  10  20   82.30    5.00
   0  10 -20   80.00    5.00
   0 -10 -20   78.40    4.60
   0 -10 -20   67.50    4.40
   0 -10  20   79.40    5.50
   0  10  21    2.80    2.90
   0  10 -21    9.10    3.70
   0 -10 -21    4.10    2.80
   0 -10 -21    3.70    2.50
   0 -10  21    0.30    2.90
   0  10  22   30.80    3.60
   0  10 -22   30.60    4.40
   0 -10 -22   37.50    4.10
   0 -10 -22   35.10    3.30
   0  10  23    3.50    4.40
   0  10 -23    5.00    4.30
   0 -10 -23   14.90    4.10
   0 -10 -23   10.30    2.90
   0 -10  23   12.20    3.20
   0  10 -24   50.50    6.70
   0 -10 -24   60.20    5.30
   0 -10  24   54.50    6.80
   0  10 -25   -1.00    5.00
   0 -10 -25    2.80    3.80
   0 -10  25   -1.60    3.40
   0  10 -26   30.00    4.50
   0 -10 -26   34.30    3.90
   0 -10  26   31.00    4.80
   0  10 -27   12.20    6.40
   0 -10 -27    8.70    3.30
   0  10 -28   15.50    4.30
   0 -10 -28   19.40    4.60
   0  10 -29   -5.30    4.10
   0 -10 -29    1.00    4.50
   0 -10 -30   25.00    4.40
   0 -10 -31    0.40    3.80
   0  12   0  127.50    6.50
   0  12   0  115.80    5.90
   0  12   1   39.40    3.50
   0  12   1   40.50    2.70
   0  12  -1   40.20    3.40
   0  12  -1   39.20    2.60
   0  12   2    6.50    2.90
   0  12   2   12.50    2.60
   0  12  -2    4.30    2.20
   0  12  -2    4.10    2.00
   0  12   3  346.30   13.10
   0  12  -3  335.90   13.10
   0  12  -3  331.70   13.00
   0 -12  -3  333.30   13.60
   0  12   4   39.10    3.10
   0  12  -4   35.40    2.70
   0  12  -4   39.10    2.80
   0 -12  -4   41.10    3.20
   0  12   5   41.30    2.80
   0  12  -5   43.40    3.20
   0  12  -5   44.20    2.90
   0 -12  -5   37.10    2.90
   0  12   6    3.90    1.90
   0  12  -6    7.00    1.90
   0 -12  -6    9.00    2.10
   0 -12   6    9.60    1.80
   0  12   7  154.10    6.40
   0  12  -7  147.40    6.10
   0 -12  -7  159.90    6.90
   0 -12   7  159.70    6.40
   0  12   8   88.20    4.60
   0  12  -8   86.50    4.40
   0 -12  -8   87.00    4.50
   0 -12   8   88.10    4.10
   0  12   9   72.30    3.90
   0  12  -9   74.90    4.10
   0 -12  -9   75.60    4.40
   0 -12   9   81.80    4.20
   0  12  10    5.40    2.00
   0  12 -10    5.80    2.20
   0 -12 -10    6.70    2.20
   0 -12  10    4.20    2.20
   0  12  11  195.20    7.70
   0  12 -11  187.70    7.50
   0 -12 -11  189.00    7.50
   0 -12  11  186.20    7.70
   0  12  12   39.10    2.90
   0  12 -12   39.20    3.70
   0 -12 -12   34.80    3.00
   0 -12  12   37.40    3.30
   0  12  13    2.70    2.30
   0  12 -13    5.30    2.60
   0 -12 -13    4.80    2.00
   0 -12  13    4.30    2.60
   0  12  14   19.20    2.60
   0  12 -14   22.00    3.10
   0 -12  14   23.30    3.20
   0 -12  14   20.30    2.30
   0  12  15   61.20    3.80
   0  12 -15   60.60    4.20
   0 -12  15   59.70    4.30
   0 -12  15   57.00    3.00
   0  12  16   15.90    2.50
   0  12 -16   16.50    3.20
   0 -12 -16   14.80    3.30
   0 -12  16   16.00    3.10
   0  12  17   52.50    4.00
   0  12 -17   54.90    4.40
   0 -12 -17   52.60    3.70
   0 -12  17   60.90    4.60
   0  12  18   13.20    3.60
   0  12 -18   16.00    5.00
   0 -12 -18   10.10    2.80
   0 -12  18   15.80    3.10
   0  12  19   51.30    4.30
   0  12 -19   59.90    4.30
   0 -12 -19   55.60    4.10
   0 -12  19   46.80    3.90
   0  12  20   14.40    3.50
   0  12 -20    8.40    4.80
   0 -12 -20   11.40    3.40
   0  12  21   20.50    3.00
   0  12 -21   39.30    4.40
   0 -12 -21   38.00    3.90
   0 -12 -21   30.80    3.60
   0  12 -22    7.30    4.40
   0 -12 -22   13.10    4.70
   0 -12 -22    9.70    2.90
   0  12 -23   24.30    4.30
   0 -12 -23   19.70    4.00
   0  12 -24   26.60    5.40
   0 -12 -24   24.20    3.90
   0  12 -25   19.40    5.70
   0 -12 -25   10.30    4.40
   0 -12  25   11.80    4.20
   0  12 -26    0.70    4.30
   0 -12 -26    3.50    3.80
   0 -12  26   -0.30    3.40
   0  12 -27   36.30    6.00
   0 -12 -27   38.60    5.10
   0  12 -28    2.40    4.40
   0 -12 -28   -0.10    3.70
   0 -12 -29    1.90    3.80
   0 -12 -30    2.20    4.10
   0  14   0   42.70    3.10
   0  14   0   45.40    3.40
   0  14   1  123.00    5.90
   0  14   1  120.60    5.80
   0  14  -1  119.80    5.50
   0  14  -1  136.10    6.30
   0  14   2   98.30    4.90
   0  14   2  101.60    5.10
   0  14  -2  102.30    5.10
   0  14  -2   96.80    4.90
   0  14   3  162.00    7.20
   0  14   3  171.50    7.40
   0  14  -3  167.20    7.50
   0  14  -3  164.40    7.70
   0  14   4    4.10    2.90
   0  14  -4    8.50    2.50
   0  14  -4    0.70    1.80
   0 -14  -4    4.70    2.30
   0  14   5  113.30    5.40
   0  14  -5  105.70    5.40
   0  14  -5  108.40    5.60
   0 -14  -5  101.80    5.30
   0  14   6    1.60    2.70
   0  14  -6    3.80    2.30
   0  14  -6    3.10    2.30
   0 -14  -6    4.20    2.80
   0  14   7   50.00    3.60
   0  14  -7   46.70    3.30
   0  14  -7   43.00    3.10
   0 -14  -7   43.60    3.20
   0  14   8    1.10    2.20
   0  14  -8   -0.30    3.20
   0 -14  -8    4.70    2.90
   0 -14   8    5.80    2.90
   0  14   9  161.40    6.90
   0  14  -9  166.30    7.50
   0 -14  -9  174.20    7.70
   0 -14   9  173.80    7.10
   0  14  10   55.20    3.80
   0  14 -10   55.70    4.40
   0 -14 -10   69.30    4.80
   0 -14  10   62.30    4.10
   0  14  11   41.30    3.40
   0  14 -11   31.30    3.30
   0 -14 -11   37.20    3.30
   0 -14  11   36.50    3.30
   0  14  12    6.60    2.40
   0  14 -12    3.90    3.10
   0 -14 -12    5.10    2.20
   0 -14  12    7.70    3.30
   0  14  13   44.50    3.30
   0  14 -13   49.60    5.60
   0 -14 -13   42.20    3.30
   0 -14  13   45.60    3.80
   0  14  14    0.60    2.50
   0  14 -14    2.40    2.80
   0 -14 -14   -0.30    2.40
   0 -14  14   -1.20    3.10
   0  14  15   78.20    4.80
   0  14 -15   88.20    5.70
   0 -14 -15   81.60    5.30
   0 -14  15   80.60    4.90
   0 -14  15   87.00    4.30
   0  14  16   10.70    3.00
   0  14 -16    6.40    4.20
   0 -14 -16    7.30    2.60
   0 -14  16    6.30    3.40
   0 -14  16    6.40    1.60
   0  14  17   30.90    3.30
   0  14 -17   35.90    4.60
   0 -14 -17   35.90    3.30
   0  14  18   -1.50    3.00
   0  14 -18    6.10    3.30
   0 -14 -18    0.50    2.60
   0  14  19   18.70    4.00
   0  14 -19   27.70    4.60
   0 -14 -19   31.00    3.60
   0  14 -20   -3.70    3.50
   0 -14 -20    3.40    3.30
   0  14 -21   61.00    5.70
   0 -14 -21   60.20    5.00
   0  14 -22    6.30    3.90
   0 -14 -22   11.70    3.30
   0  14 -23   26.60    5.00
   0 -14 -23   30.50    4.10
   0  14 -24    5.70    5.60
   0 -14 -24   -1.50    3.00
   0  14 -25   21.00    4.80
   0 -14 -25   28.90    6.00
   0  14 -26   -2.00    4.40
   0 -14 -26   -2.60    4.10
   0 -14 -27   33.00    4.40
   0 -14 -28   12.70    3.70
   0  16   0   47.50    3.70
   0  16   0   45.40    3.40
   0  16   1   25.50    3.20
   0  16   1   34.70    4.10
   0  16  -1   26.10    3.10
   0  16  -1   25.40    2.80
   0  16   2   34.20    3.00
   0  16   2   42.10    4.10
   0  16  -2   32.40    3.20
   0  16  -2   29.30    3.20
   0  16   3   64.00    4.10
   0  16   3   64.30    4.10
   0  16  -3   66.50    4.80
   0  16  -3   63.60    4.50
   0  16   4  161.60    7.10
   0  16   4  153.10    7.10
   0  16  -4  149.10    6.60
   0  16  -4  147.80    7.50
   0  16   5   29.10    3.10
   0  16   5   22.70    2.80
   0  16  -5   23.80    3.20
   0  16  -5   27.90    3.00
   0  16   6    7.60    2.80
   0  16  -6    5.60    2.80
   0  16  -6    7.20    2.30
   0 -16  -6    6.70    2.70
   0  16   7    2.80    3.30
   0  16  -7   -2.30    3.30
   0  16  -7    0.70    2.40
   0 -16  -7    0.10    2.50
   0  16   8   99.30    5.30
   0  16  -8   97.80    5.80
   0  16  -8  141.40   13.30
   0 -16  -8  102.40    5.20
   0  16   9   87.00    7.40
   0  16  -9   78.30    4.50
   0  16  -9   81.00    4.70
   0  16  10   48.30    4.10
   0  16 -10   51.30    4.00
   0 -16  10   46.90    4.00
   0  16  11    4.00    3.30
   0  16 -11   11.10    3.50
   0 -16  11    5.10    3.00
   0  16  12   10.20    2.90
   0  16 -12    9.10    3.30
   0 -16 -12   15.40    3.40
   0 -16  12   21.50    5.10
   0  16  13   36.90    3.60
   0  16 -13   36.10    3.60
   0 -16 -13   34.10    3.50
   0 -16  13   30.10    3.60
   0  16  14   39.00    3.60
   0  16 -14   44.60    4.30
   0 -16 -14   42.90    3.90
   0  16  15    9.00    3.00
   0  16 -15    8.60    3.40
   0 -16 -15   11.70    3.10
   0  16  16   85.50    5.30
   0  16 -16   93.80    5.60
   0 -16 -16  104.60    6.20
   0 -16  16   95.40    4.70
   0  16 -17   29.30    4.30
   0 -16 -17   25.70    3.60
   0  16 -18   20.50    3.60
   0 -16 -18   11.90    4.50
   0  16 -19    6.00    4.10
   0 -16 -19    1.90    3.20
   0  16 -20   38.60    5.00
   0 -16 -20   34.20    4.20
   0  16 -21   55.00    6.20
   0 -16 -21   54.40    4.80
   0  16 -23    1.30    3.80
   0 -16 -23    3.70    3.70
   0  16 -24   12.40    4.50
   0 -16 -24   12.30    4.80
   0 -16 -25   16.10    4.10
   0 -16 -26   14.50    4.40
   0 -16 -27   14.80    5.30
   0  18   0   20.10    3.30
   0  18   0   21.60    3.00
   0  18   1   -1.90    3.00
   0  18   1    2.80    2.80
   0  18  -1    4.30    2.80
   0  18  -1   -1.60    2.80
   0  18   2   60.70    4.30
   0  18   2   67.50    4.50
   0  18  -2   69.90    4.90
   0  18  -2   68.20    7.60
   0  18   3   21.00    4.30
   0  18   3   11.30    3.70
   0  18  -3   16.50    4.20
   0  18  -3   17.10    6.40
   0  18   4  245.70   10.80
   0  18   4  227.30    9.80
   0  18  -4  233.60    9.40
   0  18  -4  218.30   10.00
   0  18   5   -1.00    3.40
   0  18   5    4.70    2.70
   0  18  -5    7.20    3.40
   0  18  -5   -2.50    2.60
   0  18   6   11.40    3.90
   0  18   6    3.80    2.80
   0  18  -6    8.40    3.40
   0  18  -6    1.90    3.10
   0  18   7    5.10    3.70
   0  18   7   -0.80    3.00
   0  18  -7    0.60    3.30
   0  18  -7    1.20    2.60
   0  18   8  115.90    6.00
   0  18  -8  112.60    6.20
   0  18  -8  107.10    6.20
   0 -18  -8  112.50    6.20
   0  18   9   -1.20    3.30
   0  18  -9    0.30    3.50
   0 -18  -9    9.10    4.00
   0  18  10   58.80    4.30
   0  18 -10   69.90    4.80
   0  18  11    4.10    3.00
   0  18 -11    3.80    3.20
   0  18  12   55.90    4.10
   0  18 -12   61.20    4.70
   0 -18 -12   67.50    8.50
   0  18 -13    9.70    4.30
   0 -18 -13    3.70    3.60
   0  18 -14   35.20    3.80
   0 -18 -14   37.90    3.70
   0  18 -15   -1.50    3.50
   0 -18 -15   -1.20    3.10
   0  18 -16  102.30    6.00
   0 -18 -16   97.50    6.40
   0  18 -17   -3.70    3.70
   0 -18 -17   -6.20    3.70
   0  18 -18   23.90    4.80
   0 -18 -18   22.80    3.90
   0  18 -19   -3.40    4.20
   0 -18 -19    0.10    4.20
   0  18 -20   36.70    5.60
   0 -18 -20   39.40    5.10
   0  18 -21    9.50    4.20
   0 -18 -21    9.30    4.80
   0  18 -22   21.20    4.60
   0 -18 -22   28.50    4.70
   0 -18 -23    0.90    4.10
   0 -18 -24   15.50    4.40
   0 -18 -25    3.20    3.90
   0  20   0   38.10    4.40
   0  20   1   36.10    4.10
   0  20  -1   28.30    3.90
   0  20   2   29.70    3.50
   0  20  -2   32.40    3.70
   0  20  -3   18.70    3.50
   0  20  -4   43.50   10.10
   0  20  -5    8.40    3.10
   0  20   6   19.30    4.20
   0  20  -6   23.40    4.30
   0  20   7   22.00    4.00
   0  20  -7   16.10    3.50
   0  20  -8   27.30    3.60
   0  20  -9   45.40    4.50
   0  20 -10   26.50    4.30
   0 -20 -10   23.80    3.30
   0  20 -11   -2.60    3.40
   0 -20 -11    0.90    3.20
   0  20 -12   13.20    4.30
   0 -20 -12   12.80    3.60
   0  20 -13   44.60    4.50
   0 -20 -13   39.90    5.00
   0  20 -14   28.30    8.60
   0 -20 -14   26.60    3.90
   0  20 -15    0.10    3.90
   0 -20 -15    1.80    3.40
   0  20 -16   19.60    4.40
   0 -20 -16   17.20    4.00
   0  20 -17   29.00    4.90
   0 -20 -17   29.50    4.80
   0  20 -18    5.40    3.90
   0 -20 -18    7.70    5.10
   0  20 -19   10.40    4.70
   0 -20 -19    5.20    3.70
   0 -20 -20    8.40    3.70
   0 -20 -21   11.70    3.90
   0 -20 -22   41.20    9.80
   0  22   0    9.30    3.60
   0  22   1   26.50    3.70
   0  22  -1   24.50    4.20
   0  22  -2   20.00    4.20
   0  22  -3   63.40    4.90
   0  22  -4    8.10    4.00
   0  22   5   59.20    6.00
   0  22  -5   51.40    4.70
   0  22  -6   15.60    3.60
   0  22  -7   17.00    4.30
   0  22   8   -0.40    3.70
   0  22  -8   -1.30    4.10
   0  22   9   36.40    5.70
   0  22  -9   22.90    4.30
   0  22  10   11.70    3.90
   0  22 -10   19.80    7.60
   0  22  11   69.40    6.60
   0  22 -11   50.10    6.70
   0  22  12    7.80    4.70
   0  22 -12    0.90    3.70
   0  22 -13   27.80    4.60
   0 -22 -13   29.40    5.00
   0  22 -14   -1.50    4.40
   0 -22 -14    7.20    3.70
   0  22 -15   32.70    5.00
   0 -22 -15   26.50    5.40
   0 -22 -16    1.20    4.10
   0 -22 -17   18.90    5.20
   0 -22 -18    3.90    5.20
   0 -22 -19   17.90    5.00
   0  24  -1   23.30    4.50
   0  24   2   11.70    4.10
   0  24  -2   16.30    4.90
   0  24  -3   23.50    4.40
   0  24  -6    8.30    4.00
   0  24   7   43.00    8.10
   0  24  -7   32.30    4.70
   0  24   8    2.40    3.90
   0  24  -8    2.40    3.80
   0  24   9    9.10    4.90
   0  24  10   13.40    4.50
   0  24 -10    7.80    4.10
   0  24  11   19.60    5.20
   0  24  12    4.20    3.90
   0  24  13   17.20    6.40
   1   1 -33   -0.10    3.40
   1  -1 -33   10.80    4.30
   1   1 -32   26.80    5.00
   1  -1 -32   33.70    4.30
   1   1 -31    6.00    4.30
   1  -1 -31    4.80    3.90
   1   1 -30   19.40    5.30
   1  -1 -30   16.00    4.90
   1   1 -29    8.70    3.80
   1  -1 -29    9.90    3.60
   1   1 -28   71.90    5.10
   1  -1 -28   70.40    5.40
   1  -1 -28   62.90    6.70
   1   1 -27   24.30    3.80
   1   1 -27   28.30    4.00
   1  -1 -27   29.90    4.00
   1  -1 -27   24.70    3.80
   1   1 -26   34.10    3.70
   1   1 -26   27.20    4.00
  -1   1  26   14.00    3.80
  -1  -1  26   19.40    3.70
   1  -1 -26   32.10    3.80
   1  -1 -26   33.50    4.80
   1   1 -25    6.20    3.40
   1   1 -25    4.50    2.80
  -1   1  25   -3.00    2.80
  -1  -1  25   -1.40    2.80
   1  -1 -25    1.70    3.10
   1  -1 -25    0.30    3.40
   1   1 -24  100.70    5.60
   1   1 -24  100.60    5.60
  -1   1  24  101.00    6.00
  -1  -1  24  100.50    5.50
   1  -1 -24   99.80    5.60
   1   1 -23   25.20    3.10
   1   1 -23   27.20    4.00
  -1   1  23   25.50    3.60
  -1  -1  23   25.30    3.10
   1  -1 -23   24.10    3.10
   1   1 -22   58.30    4.20
   1   1 -22   66.70    4.40
  -1   1  22   61.30    4.00
  -1  -1  22   65.20    4.20
   1  -1 -22   61.00    3.80
   1   1 -21    4.30    2.80
   1   1 -21    1.00    2.70
  -1   1  21   -0.60    2.30
  -1  -1  21   -1.00    2.40
   1  -1 -21   -2.70    2.70
   1   1 -20  118.70    6.50
   1   1 -20  117.00    7.00
  -1   1  20  110.10    5.70
  -1  -1  20  119.60    5.60
  -1  -1  20  120.90    5.70
   1  -1 -20  119.20    5.70
   1   1 -19   64.00    4.00
   1   1 -19   61.10    4.10
  -1   1  19   57.20    3.80
  -1  -1  19   58.10    3.60
  -1  -1  19   59.40    3.70
   1  -1 -19   57.20    3.60
   1   1 -18   84.20    4.60
   1   1 -18   84.10    4.90
  -1   1  18   86.20    4.40
  -1  -1  18   83.80    4.60
  -1  -1  18   91.90    4.90
   1  -1 -18   80.50    4.20
   1   1 -17    3.50    2.20
  -1   1  17    5.60    1.90
  -1  -1  17    5.50    2.00
  -1  -1  17    2.80    1.80
   1  -1 -17    6.10    2.40
  -1   1  16  147.10    6.00
  -1  -1  16  143.60    6.40
  -1  -1  16  143.20    7.20
   1  -1 -16  139.10    6.50
   1   1 -15  113.10    5.30
  -1   1  15  117.10    5.40
  -1  -1  15  113.60    5.30
  -1  -1  15  116.30    5.30
   1  -1 -15  111.40    5.40
   1   1 -14  130.50    5.90
  -1   1  14  135.20    6.00
  -1  -1  14  126.50    5.60
  -1  -1  14  143.60    6.50
  -1   1  13   -1.60    1.80
  -1  -1  13    2.00    1.60
  -1  -1  13    2.10    1.70
   1  -1 -13    4.50    1.80
  -1   1  12  109.00    4.80
  -1  -1  12  114.20    5.10
  -1  -1  12  113.70    5.10
   1  -1 -12  116.60    5.70
   1   1 -11   31.50    2.30
  -1   1  11   35.40    2.20
  -1  -1  11   36.10    2.40
  -1  -1  11   36.20    2.50
   1  -1 -11   38.80    2.30
   1   1 -10  176.20    7.40
  -1   1  10  178.50    7.50
  -1  -1  10  175.90    7.50
  -1  -1  10  186.30    8.40
   1  -1 -10  179.30    8.30
   1   1  -9    4.00    1.50
  -1   1   9    4.40    1.10
  -1  -1   9    2.90    1.10
  -1  -1   9    2.50    1.40
   1  -1  -9    4.50    1.20
   1   1  -8   15.40    1.60
  -1   1   8   16.40    1.40
  -1   1   8   14.50    1.50
  -1  -1   8   12.10    1.40
  -1  -1   8   17.90    1.50
   1  -1  -8   18.10    1.70
   1   1  -7   82.50    4.20
   1   1  -7   90.70    4.20
  -1   1   7   82.60    3.70
  -1  -1   7   83.50    3.70
  -1  -1   7   79.90    4.00
   1  -1  -7   78.60    4.30
   1   1  -6   42.40    2.20
   1   1  -6   48.30    2.50
  -1   1   6   46.50    2.20
  -1  -1   6   48.50    2.30
  -1  -1   6   50.30    3.50
   1  -1  -6   47.40    2.60
   1   1  -5  141.30    5.40
  -1   1   5  131.60    5.70
  -1  -1   5  133.30    6.10
   1  -1  -5  141.60    5.40
   1  -1  -5  162.60    6.30
   1   1  -4  190.20    7.10
  -1  -1   4  183.00    6.90
   1  -1  -4  192.50    6.80
  -1  -1   3    5.50    0.90
   1  -1  -3    5.30    0.60
   1   1  -2 1002.10   32.80
   1  -1  -2  996.70   32.00
  -1  -1   1    5.40    0.60
   1  -1  -1    7.30    0.40
  -1   1   0  197.90    8.20
  -1  -1   0  244.00    8.40
  -1   1  -1  315.10   11.30
  -1  -1  -1  319.90   11.00
  -1   1  -2 1035.70   35.50
  -1  -1  -2 1050.10   34.60
  -1   1  -3  205.80    7.50
  -1  -1  -3  203.00    7.60
   1   1   4  393.90   14.70
  -1   1  -4  409.90   14.50
  -1  -1  -4  415.00   14.30
   1  -1   4  403.20   14.40
   1   1   5  238.20    9.10
  -1   1  -5  226.00    9.20
  -1  -1  -5  234.20    9.40
   1  -1   5  233.60    8.90
   1   1   6  629.00   21.90
  -1   1  -6  589.50   22.10
   1  -1   6  627.50   22.10
   1   1   7   29.50    1.80
  -1   1  -7   27.00    2.00
   1  -1   7   34.00    2.10
   1   1   8  605.50   21.50
  -1  -1  -8  615.00   21.80
   1  -1   8  606.10   21.40
   1  -1   8  582.00   22.40
   1   1   9   85.30    4.00
  -1  -1  -9  102.00    4.20
   1  -1   9   83.60    3.80
   1  -1   9   88.80    4.40
   1   1  10  304.20   11.90
   1  -1  10  310.40   12.00
   1  -1  10  313.90   12.60
   1   1  11   16.10    1.80
  -1  -1 -11   14.50    1.40
   1  -1  11   16.30    1.70
   1  -1  11   12.80    1.40
   1   1  12   83.40    4.00
   1  -1  12   81.70    4.10
   1  -1  12   85.00    4.50
   1   1  13   60.50    3.50
  -1   1 -13   60.90    3.50
   1  -1  13   60.50    3.20
   1  -1  13   59.60    3.50
   1   1  14  481.10   17.50
  -1   1 -14  473.00   17.90
   1  -1  14  501.60   17.90
   1  -1  14  474.70   18.40
   1   1  15   67.10    3.70
  -1   1 -15   71.10    4.10
   1  -1  15   75.20    3.80
   1  -1  15   70.30    3.40
   1   1  16   59.10    3.80
  -1   1 -16   60.80    3.60
  -1  -1 -16   58.80    3.40
   1  -1  16   56.20    3.60
   1  -1  16   62.00    3.10
   1   1  17    3.10    2.60
  -1   1 -17    4.80    2.60
  -1  -1 -17    3.50    2.30
   1  -1  17    2.50    2.10
   1  -1  17    3.70    1.40
   1   1  18   97.90    4.80
  -1   1 -18  102.60    5.40
  -1  -1 -18   95.20    4.90
   1  -1  18  100.50    4.90
   1   1  19   62.80    3.70
  -1   1 -19   66.00    4.60
  -1  -1 -19   62.40    4.20
   1  -1  19   66.30    4.30
   1   1  20   56.50    3.50
  -1   1 -20   56.30    4.10
  -1  -1 -20   49.40    4.20
   1  -1  20   54.40    3.80
   1   1  21   13.20    9.70
  -1   1 -21    3.30    2.70
  -1  -1 -21   -1.60    2.50
   1  -1  21   -4.30    3.20
   1   1  22  121.10    6.30
  -1   1 -22  122.00    6.30
  -1   1 -22  118.20    6.90
  -1  -1 -22  120.80    6.40
   1  -1  22  113.40    5.80
   1   1  23    6.30    2.90
  -1   1 -23   10.50    3.30
  -1   1 -23   11.40    3.30
  -1  -1 -23    6.90    3.00
   1  -1  23    5.40    2.80
   1   1  24   37.30    4.50
  -1   1 -24   34.20    3.70
  -1   1 -24   35.00    4.00
  -1  -1 -24   40.10    3.70
   1  -1  24   31.90    3.90
  -1   1 -25   11.80    5.90
  -1   1 -25    6.50    3.00
  -1  -1 -25    0.70    3.00
  -1   1 -26  109.60    6.40
  -1   1 -26  106.10    6.50
  -1  -1 -26  109.90    6.80
  -1   1 -27    1.70    3.40
  -1  -1 -27    4.70    3.20
  -1  -1 -27    9.90    3.90
  -1   1 -28   34.70    4.20
  -1  -1 -28   34.50    4.10
  -1   1 -29   -2.50    3.50
  -1  -1 -29   -2.80    3.90
  -1   1 -30   43.70    4.90
  -1  -1 -30   39.40    4.80
  -1   1 -31    0.90    3.80
  -1  -1 -31    2.10    3.40
  -1   1 -32   21.30    5.00
  -1  -1 -32   20.20    4.30
   1   3 -33    5.60    4.30
   1  -3 -33   14.90    5.00
   1   3 -32    6.90    5.10
   1  -3 -32    7.30    3.90
   1   3 -31   39.00    5.00
   1  -3 -31   53.10    5.80
   1   3 -30    7.90    3.30
   1  -3 -30    5.20    3.40
   1   3 -29   19.80    5.90
   1  -3 -29   15.90    4.40
   1   3 -28    9.50    4.10
   1  -3 -28   -2.30    3.40
   1   3 -27  110.30    6.10
   1  -3 -27  105.00    6.40
   1   3 -26    8.30    3.30
  -1   3  26    4.00    3.00
   1  -3 -26   13.10    3.80
   1   3 -25   48.00    4.20
  -1   3  25   47.70    5.00
  -1  -3  25   45.40    4.10
  -1  -3  25   44.40    3.50
   1  -3 -25   50.30    4.10
   1   3 -24   14.50    3.20
  -1   3  24   10.70    3.00
  -1  -3  24   16.10    4.10
  -1  -3  24   10.80    2.80
   1  -3 -24   10.20    3.00
   1   3 -23   58.20    4.30
   1   3 -23   55.80    3.80
  -1   3  23   47.80    3.60
  -1  -3  23   54.30    3.90
  -1  -3  23   54.80    3.80
   1  -3 -23   50.70    4.30
   1   3 -22    6.40    2.60
   1   3 -22    5.80    2.50
  -1   3  22    5.20    2.40
  -1  -3  22    9.20    3.00
  -1  -3  22    9.50    2.80
   1  -3 -22    7.30    2.90
   1   3 -21   68.50    4.40
   1   3 -21   58.90    4.00
  -1   3  21   74.40    4.40
  -1  -3  21   69.40    4.20
  -1  -3  21   67.60    4.60
   1  -3 -21   69.20    4.70
   1   3 -20   13.10    2.80
   1   3 -20   12.00    2.10
  -1   3  20    9.30    3.20
  -1  -3  20    9.70    2.60
  -1  -3  20   10.20    3.50
   1  -3 -20    6.10    2.80
   1   3 -19   78.00    4.40
   1   3 -19   78.10    4.20
  -1   3  19   85.60    4.40
  -1  -3  19   85.40    4.40
  -1  -3  19   82.80    4.60
   1  -3 -19   75.80    4.30
   1  -3 -19   74.70    5.10
   1   3 -18   46.40    3.30
   1   3 -18   44.30    3.00
  -1   3  18   47.60    3.00
  -1  -3  18   42.80    3.20
  -1  -3  18   46.00    3.30
   1  -3 -18   47.20    3.40
   1  -3 -18   47.20    3.00
   1   3 -17   28.70    2.40
  -1   3  17   29.50    2.30
  -1  -3  17   29.00    2.50
  -1  -3  17   32.30    2.70
   1  -3 -17   25.60    2.60
   1  -3 -17   33.50    2.80
   1   3 -16   13.10    2.30
  -1   3  16   11.90    2.20
  -1  -3  16   13.90    2.10
  -1  -3  16   13.80    2.30
   1  -3 -16   14.70    2.00
   1  -3 -16   13.70    2.10
   1   3 -15  269.70   10.80
   1   3 -15  272.00   11.00
  -1   3  15  285.10   10.80
  -1  -3  15  276.50   11.10
  -1  -3  15  298.00   13.20
   1  -3 -15  272.00   10.70
   1  -3 -15  282.90   12.70
   1   3 -14   21.20    2.40
   1   3 -14   32.10    3.60
  -1   3  14   28.70    2.40
  -1  -3  14   27.10    2.60
  -1  -3  14   29.20    2.50
   1  -3 -14   29.10    2.40
   1   3 -13  104.40    4.90
   1   3 -13  109.30    4.90
  -1   3  13  105.30    4.80
  -1  -3  13  101.50    4.80
  -1  -3  13  109.20    5.30
   1  -3 -13  107.10    5.70
   1   3 -12   67.60    3.50
   1   3 -12   69.50    3.90
  -1   3  12   67.80    3.10
  -1  -3  12   67.50    3.40
  -1  -3  12   72.80    4.40
   1  -3 -12   69.10    3.60
   1   3 -11  339.00   12.60
  -1   3  11  353.10   12.90
  -1  -3  11  350.60   13.60
   1  -3 -11  362.60   14.40
   1   3 -10   18.40    2.00
  -1   3  10   21.00    1.60
  -1  -3  10   15.20    1.70
   1  -3 -10   17.20    1.80
   1   3  -9  131.60    5.40
  -1   3   9  126.70    5.30
  -1  -3   9  134.00    5.70
   1  -3  -9  145.90    6.30
   1   3  -8  143.60    6.10
  -1   3   8  142.70    5.70
  -1  -3   8  150.50    6.20
   1  -3  -8  146.20    5.60
   1   3  -7 1004.90   34.50
  -1   3   7 1024.30   34.50
  -1  -3   7 1032.90   34.60
  -1  -3   7  984.90   34.80
   1  -3  -7 1001.80   33.70
   1   3  -6   30.80    2.00
  -1   3   6   37.40    1.90
  -1  -3   6   33.40    1.90
  -1  -3   6   34.90    2.00
   1  -3  -6   31.70    1.90
   1   3  -5  405.20   14.60
  -1   3   5  430.90   14.70
  -1  -3   5  405.80   14.40
   1  -3  -5  422.90   14.30
   1   3  -4  207.00    7.90
  -1   3   4  209.80    7.80
  -1  -3   4  231.40    8.10
   1  -3  -4  210.90    7.70
   1   3  -3  118.40    4.40
   1  -3  -3  114.30    4.40
   1   3  -2   24.90    1.90
   1  -3  -2   20.10    1.50
  -1  -3   1  201.70    7.60
   1  -3  -1  197.00    7.20
  -1   3   0   17.50    1.60
  -1  -3   0   28.20    2.10
  -1   3  -1  128.70    4.90
  -1  -3  -1  128.20    5.00
  -1   3  -2  135.90    5.60
  -1  -3  -2  136.20    5.10
   1   3   3  307.50   10.60
  -1   3  -3  281.50   10.40
  -1  -3  -3  285.90   10.60
   1  -3   3  296.20   10.40
   1   3   4   56.60    2.70
  -1   3  -4   50.90    2.90
  -1  -3  -4   49.70    2.60
   1  -3   4   51.70    2.60
   1   3   5   15.10    1.30
  -1   3  -5   13.50    1.60
  -1  -3  -5   13.50    1.30
   1  -3   5   15.80    1.30
   1   3   6   54.10    2.70
  -1   3  -6   55.10    2.80
  -1  -3  -6   56.40    2.70
   1  -3   6   55.20    2.70
   1   3   7    1.80    1.00
  -1   3  -7    2.10    1.10
  -1  -3  -7    0.70    1.00
   1  -3   7    3.50    1.20
   1   3   8  321.30   12.00
  -1   3  -8  308.10   11.60
  -1  -3  -8  325.40   11.70
   1  -3   8  322.30   11.90
   1   3   9   92.60    4.30
  -1   3  -9   89.80    4.00
  -1   3  -9  106.00    4.00
   1  -3   9   91.30    4.40
   1   3  10  291.70   10.90
  -1   3 -10  287.40   11.00
  -1   3 -10  286.10   10.80
  -1  -3 -10  287.00   11.10
   1  -3  10  289.00   11.20
   1   3  11  160.70    6.40
  -1   3 -11  163.70    6.90
  -1   3 -11  166.60    6.60
  -1  -3 -11  163.30    6.80
  -1  -3 -11  163.50    7.00
   1  -3  11  164.10    6.90
   1   3  12   56.50    3.20
  -1   3 -12   54.20    3.20
  -1   3 -12   55.10    2.90
  -1  -3 -12   58.30    2.90
  -1  -3 -12   58.20    3.30
   1  -3  12   58.80    3.50
   1   3  13  166.30    6.90
  -1   3 -13  158.70    6.70
  -1  -3 -13  156.10    6.90
  -1  -3 -13  167.60    7.20
   1  -3  13  153.40    6.80
   1  -3  13  171.60    8.40
   1   3  14  173.80    7.10
  -1   3 -14  155.00    7.20
  -1   3 -14  166.90    7.00
  -1  -3 -14  169.50    7.40
  -1  -3 -14  165.00    7.30
   1  -3  14  169.20    7.10
   1  -3  14  185.40    8.10
   1   3  15  166.90    7.00
  -1   3 -15  155.90    7.40
  -1   3 -15  153.60    6.90
  -1  -3 -15  157.30    6.80
  -1  -3 -15  160.10    7.50
   1  -3  15  160.50    7.10
   1  -3  15  162.90    7.80
   1   3  16  168.50    7.60
  -1   3 -16  157.90    7.00
  -1  -3 -16  171.40    7.10
  -1  -3 -16  161.00    7.60
   1  -3  16  165.40    7.70
   1  -3  16  176.50    7.20
   1   3  17  147.30    7.10
  -1   3 -17  140.30    6.30
  -1  -3 -17  144.30    6.70
   1  -3  17  141.50    6.60
   1  -3  17  145.70    6.90
   1   3  18   46.70    3.10
  -1   3 -18   37.30    3.20
  -1   3 -18   42.60    3.20
  -1  -3 -18   36.20    3.00
   1  -3  18   42.10    3.30
   1  -3  18   39.80    3.00
   1   3  19   47.70    3.50
  -1   3 -19   54.00    4.00
  -1   3 -19   52.30    3.40
  -1  -3 -19   46.00    3.60
   1  -3  19   49.90    3.60
   1  -3  19   52.20    3.40
   1   3  20   94.10    4.90
  -1   3 -20   89.10    5.30
  -1   3 -20   88.50    4.40
  -1  -3 -20   90.70    5.30
   1  -3  20   95.60    5.90
   1  -3  20   99.00    4.80
   1   3  21   68.60    4.30
  -1   3 -21   65.00    4.70
  -1   3 -21   65.10    3.70
  -1  -3 -21   60.50    4.60
   1  -3  21   74.60    4.70
   1  -3  21   65.10    4.10
   1   3  22   71.40    4.80
  -1   3 -22   84.50    5.10
  -1   3 -22   74.80    4.50
  -1  -3 -22   79.40    4.90
   1  -3  22   70.00    4.50
   1  -3  22   91.20    9.60
   1   3  23   55.60    4.10
  -1   3 -23   62.70    4.40
  -1   3 -23   60.00    4.10
  -1  -3 -23   65.50    5.00
   1  -3  23   61.90    5.40
   1   3  24   10.30    3.20
  -1   3 -24   13.10    3.70
  -1   3 -24   15.20    2.80
  -1  -3 -24    9.60    3.10
   1  -3  24    9.10    3.60
  -1   3 -25   21.20    3.80
  -1  -3 -25   24.70    3.50
  -1   3 -26   11.90    3.40
  -1  -3 -26    6.60    3.10
  -1   3 -27   24.20    4.30
  -1  -3 -27   16.80    4.10
  -1   3 -28   24.20    4.50
  -1  -3 -28   48.70    6.50
  -1   3 -29   20.30    4.70
  -1  -3 -29   22.20    4.20
  -1   3 -30   -0.70    3.60
  -1  -3 -30    5.70    3.40
  -1   3 -31   48.30    5.20
  -1  -3 -31   42.30    6.20
  -1  -3 -32    0.90    4.00
   1  -5 -33   14.80    4.60
   1   5 -32   17.60    4.30
   1  -5 -32    5.00    4.50
   1   5 -31   16.10    4.30
   1  -5 -31   18.50    4.30
   1   5 -30    1.50    3.40
   1  -5 -30    1.70    3.70
   1   5 -29   47.50    5.30
   1  -5 -29   33.30    5.00
   1   5 -28    3.90    3.60
   1  -5 -28    2.80    3.60
   1   5 -27   48.70    4.30
  -1  -5  27   46.70    4.20
   1  -5 -27   47.20    8.70
   1   5 -26    8.10    3.60
  -1   5  26   -5.90    3.60
  -1  -5  26   -0.10    2.60
   1  -5 -26    0.00    3.30
   1   5 -25   54.70    4.50
  -1   5  25   50.30    5.50
  -1  -5  25   61.40    5.10
   1  -5 -25   51.80    4.30
   1   5 -24   42.70    3.80
  -1   5  24   39.00    4.60
  -1  -5  24   36.50    4.00
  -1  -5  24   41.70    3.60
   1  -5 -24   36.60    3.90
   1   5 -23   54.90    4.40
  -1   5  23   58.40    4.50
  -1  -5  23   55.00    3.90
  -1  -5  23   62.00    4.60
   1  -5 -23   54.20    4.30
   1   5 -22    5.90    3.10
  -1   5  22    5.90    3.10
  -1  -5  22    2.20    2.80
  -1  -5  22    2.70    1.90
   1  -5 -22    5.60    2.80
   1  -5 -22    2.00    1.90
   1   5 -21  118.90    6.30
  -1   5  21  115.80    5.50
  -1  -5  21  114.30    6.00
  -1  -5  21  115.80    6.50
   1  -5 -21  117.50    5.50
   1  -5 -21  121.80    6.70
   1   5 -20   10.30    2.60
  -1   5  20    8.70    2.90
  -1  -5  20    8.40    2.60
  -1  -5  20    5.00    2.80
   1  -5 -20   12.30    2.60
   1  -5 -20    5.30    2.30
   1   5 -19  113.80    6.10
  -1   5  19  106.90    5.30
  -1  -5  19  118.30    5.80
  -1  -5  19  118.60    5.80
   1  -5 -19  115.10    5.50
   1  -5 -19  117.90    6.70
   1   5 -18   24.60    2.90
  -1   5  18   22.00    2.30
  -1  -5  18   21.90    3.10
  -1  -5  18   25.20    3.00
   1  -5 -18   23.30    2.40
   1  -5 -18   22.50    2.60
   1   5 -17  148.00    7.10
  -1   5  17  144.20    6.20
  -1  -5  17  152.50    6.60
  -1  -5  17  151.20    8.80
   1  -5 -17  146.60    6.80
   1  -5 -17  156.30    7.00
   1   5 -16   33.90    2.80
  -1   5  16   34.80    2.80
  -1  -5  16   40.30    3.40
  -1  -5  16   36.80    3.30
   1  -5 -16   34.10    2.60
   1  -5 -16   37.40    2.70
   1   5 -15  111.90    5.20
  -1   5  15  120.10    5.20
  -1  -5  15  110.00    5.40
   1  -5 -15  105.80    5.00
   1  -5 -15  114.00    5.90
   1   5 -14   29.20    2.40
  -1   5  14   33.60    2.50
  -1  -5  14   35.30    3.00
   1  -5 -14   30.10    2.30
   1  -5 -14   30.90    2.40
   1   5 -13  321.60   12.10
  -1   5  13  338.10   12.20
  -1  -5  13  341.20   13.40
   1  -5 -13  321.40   12.50
   1  -5 -13  362.00   13.90
   1   5 -12   -0.90    1.60
  -1   5  12   -3.80    1.60
   1  -5 -12   -1.50    3.00
   1   5 -11   64.00    3.60
  -1   5  11   69.80    3.20
  -1  -5  11   66.30    3.40
   1  -5 -11   65.80    3.30
   1   5 -10    2.20    1.40
  -1  -5  10    2.00    1.40
  -1  -5  10    1.20    1.00
   1  -5 -10   -0.90    1.40
   1   5  -9  616.50   21.60
  -1   5   9  624.20   21.70
  -1  -5   9  612.10   22.10
  -1  -5   9  637.50   22.30
   1  -5  -9  630.50   21.30
   1   5  -8   19.80    1.80
  -1   5   8   21.90    1.60
  -1  -5   8   19.30    1.70
   1  -5  -8   22.10    1.70
   1   5  -7   76.20    3.70
  -1   5   7   77.00    3.30
  -1  -5   7   73.10    3.50
   1  -5  -7   72.70    3.60
   1   5  -6    2.90    1.10
  -1   5   6    3.20    1.00
  -1  -5   6    2.40    1.10
   1  -5  -6    2.30    1.00
   1   5  -5  580.90   20.80
  -1   5   5  582.10   21.00
  -1  -5   5  603.50   20.60
   1  -5  -5  572.20   20.70
   1   5  -4   11.50    1.20
  -1   5   4   13.50    1.30
  -1  -5   4   15.90    1.90
   1  -5  -4   11.90    1.10
   1   5  -3  313.00   12.60
  -1   5   3  338.40   11.90
  -1  -5   3  328.80   12.00
   1  -5  -3  319.40   11.90
   1   5  -2   41.20    2.40
   1   5  -2   43.60    2.30
  -1   5   2   44.90    2.30
   1  -5  -2   45.00    2.40
   1   5  -1  395.20   14.60
   1   5  -1  404.10   14.90
  -1   5   1  400.10   15.20
  -1   5   1  411.70   15.00
   1   5   0   -0.90    0.90
  -1   5   0   -2.70    1.00
  -1   5   0    1.90    0.80
  -1  -5   0   -5.40    1.30
   1   5   1  423.80   15.30
  -1   5  -1  413.40   14.80
  -1  -5  -1  399.30   14.60
   1  -5   1  417.40   14.60
   1   5   2   23.10    1.70
  -1   5  -2   21.60    1.80
  -1  -5  -2   19.90    1.50
   1  -5   2   25.00    1.70
   1   5   3  204.70    7.80
  -1   5  -3  211.60    7.90
  -1  -5  -3  211.90    8.50
   1  -5   3  214.80    7.80
   1   5   4  151.70    6.10
  -1   5  -4  156.80    6.30
  -1  -5  -4  159.30    6.70
   1  -5   4  153.80    5.70
   1   5   5  186.00    7.40
  -1   5  -5  184.30    7.30
  -1  -5  -5  183.60    7.60
   1  -5   5  178.20    6.90
   1   5   6   99.70    4.20
  -1   5  -6   93.10    4.20
  -1  -5  -6   97.20    4.10
   1  -5   6   96.00    4.30
   1   5   7  186.00    6.70
  -1   5  -7  181.90    7.20
  -1  -5  -7  183.30    7.20
   1  -5   7  184.50    7.10
   1  -5   7  187.10    6.90
   1   5   8  148.50    6.20
  -1   5  -8  148.10    6.20
  -1  -5  -8  146.30    5.70
   1  -5   8  151.10    6.30
   1   5   9  100.40    4.20
  -1   5  -9   91.90    4.50
  -1  -5  -9   96.10    4.30
   1  -5   9  100.40    4.60
   1   5  10   45.80    2.60
  -1   5 -10   49.30    3.00
  -1  -5 -10   46.20    2.70
   1  -5  10   49.70    3.00
   1   5  11  117.30    5.10
  -1   5 -11  114.90    5.00
  -1  -5 -11  116.10    5.00
   1  -5  11  124.70    5.70
   1   5  12   88.50    4.00
  -1   5 -12   87.40    4.60
  -1  -5 -12   91.20    4.60
   1  -5  12   92.90    4.40
   1   5  13  154.20    6.30
  -1   5 -13  146.80    6.30
  -1  -5 -13  159.60    6.80
  -1  -5 -13  154.60    7.10
   1  -5  13  148.90    6.60
   1   5  14    2.70    1.70
  -1   5 -14    1.00    2.10
  -1  -5 -14    2.00    1.70
  -1  -5 -14    0.80    1.30
   1  -5  14    1.30    1.80
   1   5  15   54.50    3.30
  -1   5 -15   47.70    3.20
  -1  -5 -15   49.30    3.30
  -1  -5 -15   53.60    3.30
   1  -5  15   48.30    3.10
   1   5  16   30.30    2.70
  -1   5 -16   31.60    2.90
  -1  -5 -16   33.10    2.90
  -1  -5 -16   31.50    2.50
   1  -5  16   35.00    3.00
   1   5  17   90.20    4.20
  -1   5 -17   87.10    4.90
  -1  -5 -17   94.20    4.90
  -1  -5 -17   86.90    4.60
   1  -5  17  102.00    6.20
   1  -5  17   90.30    5.10
   1   5  18    1.00    2.20
  -1   5 -18    3.30    2.60
  -1  -5 -18    1.40    2.60
  -1  -5 -18    0.60    1.50
   1  -5  18    4.90    2.50
   1  -5  18   -0.20    2.00
   1   5  19  136.40    6.40
  -1   5 -19  141.20    8.30
  -1  -5 -19  133.10    6.10
  -1  -5 -19  133.30    6.80
   1  -5  19  147.20    7.20
   1  -5  19  139.70    6.50
   1   5  20   31.30    3.10
  -1   5 -20   24.50    3.30
  -1  -5 -20   28.10    3.00
  -1  -5 -20   27.50    2.40
   1  -5  20   23.00    3.10
   1  -5  20   30.60    2.70
   1   5  21   84.80    5.00
  -1   5 -21   81.40    5.40
  -1  -5 -21   90.00    5.00
   1  -5  21   85.80    7.70
   1  -5  21   79.70    4.80
   1   5  22    0.10    3.40
  -1   5 -22    6.70    4.10
  -1  -5 -22    6.70    4.90
   1  -5  22    1.00    2.70
   1  -5  22    7.30    2.60
   1   5  23   58.50    4.60
  -1   5 -23   73.00    5.50
  -1  -5 -23   75.00    5.90
   1  -5  23   59.60    5.50
   1  -5  23   61.60    4.40
   1   5  24   -7.70    3.20
  -1   5 -24    2.70    6.60
  -1  -5 -24   -1.60    3.20
   1  -5  24    2.00    2.70
  -1   5 -25   79.80    5.90
  -1  -5 -25   72.80    5.30
   1  -5  25   69.10    4.40
  -1   5 -26    6.90    3.80
  -1  -5 -26    8.30    3.30
  -1  -5 -27   69.40    5.90
  -1   5 -28    1.30    3.60
  -1  -5 -28   -3.10    3.60
  -1   5 -29   41.10    4.80
  -1  -5 -29   36.60    4.80
  -1   5 -30    8.20    5.00
  -1  -5 -30   16.90    5.00
  -1   5 -31   13.30    4.00
  -1  -5 -31   12.70    4.50
  -1  -5 -32    8.10    8.80
   1  -7 -33   16.40    6.30
   1   7 -32   12.60    4.40
   1  -7 -32   12.30    4.80
   1   7 -31    3.80    4.00
   1  -7 -31    0.70    4.30
   1   7 -30   20.30    3.90
   1  -7 -30   39.10    9.50
   1   7 -29   29.70    4.40
   1  -7 -29   28.10    4.20
   1   7 -28   19.70    3.90
   1  -7 -28   14.40    3.50
   1   7 -27   17.50    3.90
  -1  -7  27   11.40    3.10
   1  -7 -27    7.40    3.60
   1   7 -26   54.60    5.20
  -1  -7  26   53.50    5.20
   1  -7 -26   61.50    9.80
   1   7 -25   36.20    5.40
  -1   7  25   19.10    3.50
  -1  -7  25   25.70    3.40
   1  -7 -25   33.70    4.70
   1  -7 -25   24.80    3.30
   1   7 -24   28.10    5.80
  -1   7  24   23.80    3.90
  -1  -7  24   21.10    3.10
   1  -7 -24   28.00    4.40
   1  -7 -24   26.90    3.40
   1   7 -23    0.30    3.40
  -1   7  23    1.90    2.70
  -1  -7  23    3.40    3.60
  -1  -7  23    5.30    3.00
   1  -7 -23   -3.60    3.50
   1  -7 -23    0.60    2.10
   1   7 -22   34.50    3.80
  -1   7  22   28.50    3.70
  -1  -7  22   24.70    3.60
  -1  -7  22   28.80    3.40
   1  -7 -22   34.00    3.80
   1  -7 -22   29.00    3.50
   1   7 -21  292.70   12.00
  -1   7  21  271.10   11.60
  -1  -7  21  284.60   12.20
  -1  -7  21  281.30   13.90
   1  -7 -21  294.60   11.00
   1  -7 -21  284.90   12.50
   1   7 -20  141.10    6.80
  -1   7  20  137.70    6.60
  -1  -7  20  136.10    7.20
  -1  -7  20  136.80    7.70
   1  -7 -20  144.70    6.60
   1  -7 -20  129.70    6.90
   1   7 -19    7.80    3.10
  -1   7  19    5.60    2.50
  -1  -7  19    0.10    2.70
  -1  -7  19    3.90    2.80
   1  -7 -19    0.50    2.50
   1  -7 -19    1.70    2.50
   1   7 -18  121.00    5.70
  -1   7  18  112.80    5.40
  -1  -7  18  112.20    5.70
   1  -7 -18  122.10    5.90
   1  -7 -18  112.70    6.00
   1   7 -17   57.40    3.90
  -1   7  17   60.00    3.60
  -1  -7  17   59.30    3.80
   1  -7 -17   56.50    3.40
   1  -7 -17   55.00    4.00
   1   7 -16   31.40    2.90
  -1   7  16   38.20    2.70
  -1  -7  16   40.20    3.00
   1  -7 -16   37.20    2.90
   1  -7 -16   35.20    2.90
   1   7 -15   55.40    3.60
  -1   7  15   62.00    3.20
  -1  -7  15   62.60    3.90
   1  -7 -15   66.40    3.70
   1   7 -14  103.90    4.70
  -1   7  14  111.40    4.60
  -1  -7  14  108.20    5.00
   1  -7 -14  100.10    4.90
   1   7 -13   73.60    4.00
  -1   7  13   76.50    3.70
  -1  -7  13   81.00    4.00
   1  -7 -13   74.40    3.70
   1   7 -12  538.60   19.30
  -1   7  12  506.40   18.20
  -1  -7  12  524.80   18.60
  -1  -7  12  530.60   19.30
   1  -7 -12  495.60   18.20
   1   7 -11   -0.20    1.90
  -1   7  11    1.10    1.60
  -1  -7  11    0.20    1.90
  -1  -7  11    0.70    1.30
   1  -7 -11   -3.50    1.80
   1   7 -10   56.30    3.00
  -1   7  10   59.30    3.10
  -1  -7  10   62.70    3.30
   1  -7 -10   63.30    4.90
   1   7  -9   69.00    3.40
  -1   7   9   71.40    3.10
  -1  -7   9   68.40    3.50
   1  -7  -9   70.60    3.60
   1   7  -8  120.00    5.40
  -1   7   8  144.50    9.70
  -1  -7   8  120.70    5.60
   1  -7  -8  121.20    5.40
   1   7  -7    8.90    1.50
  -1   7   7   10.80    1.50
  -1  -7   7   11.70    1.60
   1  -7  -7   14.50    2.20
   1   7  -6  298.70   11.20
  -1   7   6  309.20   11.10
  -1  -7   6  303.00   11.90
   1  -7  -6  296.10   11.30
   1   7  -5  220.40    8.80
  -1   7   5  228.20    9.00
  -1  -7   5  226.00    9.00
   1  -7  -5  222.10    8.70
   1   7  -4   63.60    3.30
  -1   7   4   60.80    3.20
  -1  -7   4   69.80    3.30
   1  -7  -4   63.60    3.10
   1   7  -3   43.70    2.50
   1   7  -3   47.10    2.60
  -1   7   3   45.70    2.60
   1  -7  -3   44.70    2.50
   1   7  -2   46.40    2.70
   1   7  -2   43.60    2.50
  -1   7   2   46.10    2.70
   1  -7  -2   44.60    2.80
   1   7  -1  145.30    6.40
   1   7  -1  150.00    6.20
  -1   7   1  148.10    6.00
  -1   7   1  145.60    6.30
   1   7   0  195.50    7.80
  -1   7   0  196.80    7.60
  -1   7   0  201.90    7.80
  -1  -7   0  194.80    8.00
   1   7   1   10.40    1.50
  -1   7  -1   10.50    1.20
  -1  -7  -1   11.10    1.40
   1  -7   1    9.30    1.40
   1   7   2   10.70    1.50
  -1   7  -2   12.30    1.90
  -1  -7  -2   10.90    1.40
   1  -7   2   13.40    2.20
   1   7   3  363.70   13.50
  -1   7  -3  368.50   13.90
  -1  -7  -3  360.40   14.30
   1  -7   3  383.10   13.70
   1   7   4  147.70    5.90
  -1   7  -4  139.70    6.40
  -1  -7  -4  141.20    6.30
   1  -7   4  151.80    6.40
   1   7   5  124.00    5.40
  -1   7  -5  119.40    4.90
  -1  -7  -5  117.60    4.90
   1  -7   5  120.90    5.20
   1   7   6   20.10    1.80
  -1   7  -6   18.20    1.70
  -1  -7  -6   21.30    2.30
   1  -7   6   17.80    1.70
   1   7   7  212.40    9.00
  -1   7  -7  210.50    8.40
  -1  -7  -7  218.50    9.00
   1  -7   7  210.30    8.00
   1   7   8  103.60    4.60
  -1   7  -8  107.40    4.30
  -1  -7  -8  110.60    5.20
   1  -7   8  101.30    4.40
   1   7   9   92.70    3.90
  -1   7  -9   92.30    4.10
  -1  -7  -9   87.80    3.90
   1  -7   9   91.10    4.10
   1   7  10   33.30    2.40
  -1   7 -10   27.50    2.40
  -1  -7 -10   29.50    2.30
   1  -7  10   29.60    2.30
   1   7  11  100.10    4.20
  -1   7 -11   95.50    5.90
  -1  -7 -11   94.30    4.70
   1  -7  11   99.20    4.90
   1   7  12   62.10    3.20
  -1   7 -12   63.00    5.20
  -1  -7 -12   56.60    3.10
   1  -7  12   63.20    3.60
   1   7  13    7.90    1.90
  -1   7 -13    8.40    2.10
   1  -7  13    9.90    2.20
   1   7  14   10.40    2.00
  -1   7 -14    7.30    2.20
   1  -7  14   15.80    2.70
   1   7  15   20.70    2.30
  -1   7 -15   20.00    2.60
  -1  -7 -15   21.00    2.50
   1  -7  15   26.50    3.50
   1   7  16   96.30    4.50
  -1   7 -16   82.70    4.80
  -1  -7 -16  106.20    5.00
  -1  -7 -16   96.00    5.00
   1  -7  16   99.70    4.80
   1   7  17   42.50    3.30
  -1   7 -17   41.60    3.20
  -1  -7 -17   47.60    3.60
  -1  -7 -17   43.60    3.20
   1  -7  17   49.90    3.60
   1   7  18   45.60    3.50
  -1   7 -18   42.70    3.60
  -1  -7 -18   45.40    3.80
  -1  -7 -18   39.10    2.90
   1  -7  18   45.70    3.80
   1   7  19  101.70    5.40
  -1   7 -19   99.40    5.40
  -1  -7 -19  104.30    5.70
  -1  -7 -19   99.40    5.10
   1  -7  19  111.60    6.00
   1   7  20    7.10    3.50
  -1   7 -20   14.40    5.50
  -1  -7 -20    5.70    2.80
  -1  -7 -20    9.70    2.10
   1  -7  20   10.90    4.10
   1  -7  20    6.30    2.70
   1   7  21   20.10    3.80
  -1   7 -21   21.90    3.70
  -1  -7 -21   18.40    3.60
  -1  -7 -21   22.30    2.40
   1  -7  21   17.00    3.30
   1  -7  21   21.00    2.80
   1   7  22   34.60    3.80
  -1   7 -22   36.30    3.80
  -1  -7 -22   38.30    5.10
  -1  -7 -22   37.20    3.70
   1  -7  22   49.50    8.10
   1  -7  22   33.20    3.30
   1   7  23   29.90    3.90
  -1   7 -23   34.80    4.70
  -1  -7 -23   59.40   10.10
  -1  -7 -23   32.80    3.00
   1  -7  23   34.40    3.40
  -1   7 -24   32.10    3.90
  -1  -7 -24   33.40    4.20
   1  -7  24   29.60    3.60
  -1   7 -25   38.50    4.20
  -1  -7 -25   41.60    4.00
   1  -7  25   48.10    4.00
  -1   7 -26   19.80    4.30
  -1  -7 -26   18.10    4.10
  -1   7 -27   21.10    4.40
  -1  -7 -27   27.00    4.20
  -1   7 -28   19.70    5.00
  -1  -7 -28   34.30    6.90
  -1   7 -29   29.10    4.40
  -1  -7 -29   28.90    4.70
  -1   7 -30   20.30    4.70
  -1  -7 -30   11.00    4.00
  -1  -7 -31   -1.60    4.40
   1  -9 -32    3.00    4.50
   1   9 -31   -4.50    4.40
   1  -9 -31   -4.00    3.50
   1   9 -30   19.80    4.70
   1  -9 -30   21.60    4.30
   1   9 -29    2.10    4.80
   1  -9 -29   -1.60    3.90
   1   9 -28   85.60   15.60
   1  -9 -28   14.20    4.60
   1   9 -27    7.00    4.30
  -1  -9  27    3.10    3.80
   1  -9 -27   -0.50    4.10
   1   9 -26   48.30    5.20
  -1  -9  26   49.30    4.80
   1  -9 -26   54.70    4.90
   1   9 -25    5.10    4.40
  -1  -9  25   14.70    5.40
   1  -9 -25    4.20    3.20
   1   9 -24   29.60    6.10
  -1   9  24   27.50    3.90
  -1  -9  24   41.60    4.50
   1  -9 -24   33.60    4.40
   1  -9 -24   37.30    4.60
   1   9 -23   -0.70    5.60
  -1   9  23    4.30    4.20
  -1  -9  23    2.10    4.30
   1  -9 -23    1.20    3.10
   1  -9 -23    1.70    2.50
   1   9 -22   90.90    5.50
  -1   9  22   85.10    5.00
  -1  -9  22   79.20    6.10
  -1  -9  22   93.00    6.30
   1  -9 -22   85.10    5.00
   1  -9 -22   81.90    5.20
   1   9 -21   13.70    4.20
  -1   9  21    4.90    2.50
  -1  -9  21    0.50    2.80
   1  -9 -21    6.80    2.90
   1  -9 -21    3.20    2.60
   1   9 -20   45.00    3.90
  -1   9  20   52.10    3.70
  -1  -9  20   46.80    4.00
   1  -9 -20   46.50    3.50
   1  -9 -20   47.90    3.90
   1   9 -19    9.30    3.10
  -1   9  19    6.80    2.50
  -1  -9  19    6.10    2.70
   1  -9 -19    9.20    3.20
   1  -9 -19    6.10    2.60
   1   9 -18  111.60    5.30
  -1   9  18  110.20    5.30
  -1  -9  18  100.60    5.50
   1  -9 -18  105.20    5.00
   1  -9 -18   99.50    5.90
   1   9 -17   -1.00    2.60
  -1   9  17   -3.30    2.50
  -1  -9  17   -3.20    2.00
   1  -9 -17    2.90    2.50
   1   9 -16  140.00    6.40
  -1   9  16  139.90    6.00
  -1  -9  16  140.60    5.90
   1  -9 -16  134.20    6.40
   1   9 -15    3.40    2.20
  -1   9  15    0.60    1.90
  -1  -9  15    2.10    3.40
   1  -9 -15    1.00    1.90
   1   9 -14   96.90    4.80
  -1   9  14   97.70    4.60
  -1  -9  14  106.30    5.30
  -1  -9  14  103.00    4.50
   1  -9 -14   93.90    4.70
   1   9 -13   11.70    2.30
  -1   9  13    8.20    2.00
  -1  -9  13   12.80    2.20
  -1  -9  13   10.00    2.00
   1  -9 -13   10.50    1.90
   1   9 -12  102.60    5.40
  -1   9  12  109.90    4.90
  -1  -9  12  109.80    5.30
   1  -9 -12  109.40    5.30
   1   9 -11   -2.50    1.90
  -1   9  11   -2.30    1.70
  -1  -9  11   -1.90    1.70
   1  -9 -11   -3.10    1.50
   1   9 -10  210.00    8.40
  -1   9  10  221.30    8.50
  -1  -9  10  218.40    8.60
   1  -9 -10  219.60    9.40
   1   9  -9   17.00    2.00
  -1   9   9   26.40    2.30
  -1  -9   9   27.10    2.30
   1  -9  -9   21.70    2.10
   1   9  -8  221.30    8.60
  -1   9   8  231.60    8.70
  -1  -9   8  230.10    8.60
   1  -9  -8  216.60    9.10
   1   9  -7  115.40    4.90
  -1   9   7  116.30    5.20
  -1  -9   7  120.70    5.00
   1  -9  -7  112.90    4.70
   1   9  -6  151.60    6.00
  -1   9   6  146.80    6.40
  -1  -9   6  151.50    6.00
   1  -9  -6  151.60    6.70
   1   9  -5    5.50    2.50
  -1   9   5   11.80    2.20
  -1  -9   5    6.70    1.70
   1  -9  -5    9.50    2.30
   1   9  -4  430.10   16.60
   1   9  -4  425.40   16.20
  -1   9   4  434.70   15.40
   1  -9  -4  423.40   15.80
   1   9  -3   16.40    2.90
   1   9  -3   16.50    2.10
  -1   9   3   14.70    1.70
   1  -9  -3   13.50    1.80
   1   9  -2   52.20    2.90
   1   9  -2   51.10    2.70
  -1   9   2   54.20    2.80
  -1   9   2   51.70    3.00
   1   9  -1   71.80    4.10
   1   9  -1   68.60    3.30
  -1   9   1   75.50    3.80
  -1   9   1   73.40    4.00
   1   9   0  389.60   14.20
   1   9   0  399.90   15.10
  -1   9   0  387.20   14.60
  -1   9   0  401.30   15.10
   1   9   1   49.10    3.00
  -1   9  -1   45.90    3.10
  -1   9  -1   49.00    2.60
  -1  -9  -1   53.70    3.40
   1   9   2   13.00    1.70
  -1   9  -2    8.80    1.50
  -1   9  -2   15.50    1.60
  -1  -9  -2   15.30    1.80
   1   9   3   14.80    2.00
  -1   9  -3   12.00    2.00
  -1  -9  -3   17.30    2.60
   1  -9   3   16.80    2.30
   1   9   4  361.50   13.90
  -1   9  -4  366.90   13.10
  -1  -9  -4  352.30   13.80
   1  -9   4  367.60   13.50
   1   9   5   53.20    3.10
  -1   9  -5   52.20    2.90
  -1  -9  -5   56.70    3.20
   1  -9   5   53.70    3.10
   1   9   6  190.60   11.50
  -1   9  -6  178.30    7.50
  -1  -9  -6  185.60    7.10
   1  -9   6  187.40    8.00
   1   9   7  178.00    7.00
  -1   9  -7  171.00    8.10
  -1  -9  -7  179.70    7.40
   1  -9   7  188.20    7.30
   1   9   8  128.30    5.20
  -1   9  -8  124.40    5.10
  -1  -9  -8  120.70    5.50
   1  -9   8  122.40    5.40
   1   9   9    7.00    1.80
  -1   9  -9    7.50    1.90
  -1  -9  -9    8.50    1.80
   1  -9   9    5.80    2.00
   1   9  10   58.30    3.30
  -1   9 -10   61.50    3.20
  -1  -9 -10   54.50    3.20
   1  -9  10   57.00    3.20
   1   9  11   42.30    2.60
  -1   9 -11   53.20    3.50
  -1  -9 -11   38.80    2.80
   1  -9  11   47.20    3.20
   1  -9  11   44.30    2.60
   1   9  12  144.00    6.10
  -1   9 -12  146.20    6.70
  -1  -9 -12  146.30    6.50
   1  -9  12  148.80    6.10
   1   9  13   36.70    2.80
  -1   9 -13   33.10    2.90
  -1  -9 -13   35.30    2.70
   1  -9  13   39.00    4.30
   1   9  14   82.20    3.90
  -1   9 -14   82.50    4.70
  -1  -9 -14   78.80    4.10
   1  -9  14   87.90    4.80
   1   9  15    1.10    2.60
  -1   9 -15   -0.40    2.30
  -1  -9 -15    2.00    2.10
   1  -9  15   -0.50    2.60
   1   9  16   47.90    3.40
  -1   9 -16   46.80    3.70
  -1  -9 -16   57.40    4.40
   1  -9  16   49.20    3.40
   1   9  17    4.80    2.90
  -1   9 -17    4.70    2.70
  -1  -9 -17    8.30    2.60
   1  -9  17    5.00    2.90
   1   9  18   26.50    4.50
  -1   9 -18   27.70    3.40
  -1  -9 -18   24.00    2.80
  -1  -9 -18   23.90    2.80
   1  -9  18   24.00    3.20
   1   9  19    3.70    2.60
  -1   9 -19    4.80    3.50
  -1  -9 -19   -0.30    2.50
  -1  -9 -19    3.00    2.20
   1  -9  19    6.40    3.00
   1   9  20  151.60    7.10
  -1   9 -20  152.70    7.50
  -1  -9 -20  152.00    7.50
  -1  -9 -20  149.20    6.90
   1  -9  20  157.20    8.60
   1   9  21   -1.80    2.80
  -1   9 -21    5.80    3.50
  -1  -9 -21   -1.10    2.80
  -1  -9 -21    1.40    1.90
   1  -9  21   -2.50    3.20
   1   9  22   14.20    3.20
  -1   9 -22   16.20    3.70
  -1  -9 -22   49.40    9.90
  -1  -9 -22   11.70    2.30
   1  -9  22   16.40    3.20
  -1   9 -23    3.90    3.80
  -1  -9 -23    2.90    3.40
  -1  -9 -23   -0.20    1.90
   1  -9  23   -0.70    3.10
  -1   9 -24   84.80    6.00
  -1  -9 -24   73.90    5.50
   1  -9  24   88.50    5.70
  -1   9 -25    9.30    4.20
  -1  -9 -25    0.10    3.50
   1  -9  25   -0.70    2.60
  -1   9 -26    5.20    3.90
  -1  -9 -26    8.60    3.90
  -1   9 -27    1.40    4.50
  -1  -9 -27    2.80    5.50
  -1   9 -28   55.70    5.70
  -1  -9 -28   49.40    5.50
  -1   9 -29    2.10    3.60
  -1  -9 -29   -2.50    4.10
  -1  -9 -30   11.50    4.00
   1 -11 -31    1.10    3.60
   1 -11 -30   12.00    4.10
   1  11 -29   25.40    4.80
   1 -11 -29   16.40    4.00
   1  11 -28   14.40    4.40
   1 -11 -28   18.70    4.90
   1  11 -27    3.80    4.00
  -1 -11  27    2.20    4.40
   1 -11 -27    3.70    3.70
   1  11 -26   19.40    4.90
  -1 -11  26   15.50    4.20
   1 -11 -26   14.20    3.70
   1  11 -25   50.70    5.70
  -1 -11  25   39.10    4.50
   1 -11 -25   49.90    4.60
   1  11 -24   53.50    9.90
  -1 -11  24   42.70    5.10
   1 -11 -24   41.20    4.10
   1 -11 -24  112.10   17.50
   1  11 -23   17.60    4.10
  -1  11  23    9.50    3.30
   1 -11 -23   13.40    3.80
   1 -11 -23   15.70    3.10
   1  11 -22   41.50    5.00
  -1  11  22   33.90    3.80
   1 -11 -22   40.10    3.90
   1 -11 -22   37.80    3.70
   1  11 -21   28.30    4.60
  -1  11  21   30.40    3.60
   1 -11 -21   26.80    3.80
   1 -11 -21   28.00    3.10
   1  11 -20   12.70    3.40
  -1  11  20   18.00    3.50
  -1 -11  20    8.20    3.40
   1 -11 -20   12.20    3.10
   1 -11 -20   16.60    3.10
   1  11 -19   12.20    3.30
  -1  11  19   11.10    2.60
  -1 -11  19    9.10    2.90
   1 -11 -19   10.30    2.80
   1  11 -18   20.50    5.50
  -1  11  18   26.10    2.70
  -1 -11  18   24.90    4.10
   1 -11 -18   23.40    2.90
   1  11 -17  188.80    8.10
  -1  11  17  176.60    8.00
  -1 -11  17  194.10    8.80
   1 -11 -17  182.90    8.20
   1  11 -16  183.00    8.50
  -1  11  16  177.00    7.80
  -1 -11  16  190.50    8.60
   1 -11 -16  181.40    7.70
   1  11 -15   27.60    3.20
  -1  11  15   25.60    2.60
  -1 -11  15   27.10    3.90
  -1 -11  15   26.20    2.30
   1  11 -14    5.50    2.50
  -1  11  14    5.40    1.90
  -1 -11  14    6.10    2.70
  -1 -11  14    6.10    1.70
   1  11 -13  281.90   10.30
  -1  11  13  276.70   10.40
  -1 -11  13  270.70   10.90
   1 -11 -13  274.60   11.00
   1  11 -12   36.30    3.30
  -1  11  12   34.50    2.60
  -1 -11  12   31.70    2.90
   1 -11 -12   30.70    2.60
   1  11 -11   -2.40    2.00
  -1  11  11   -1.70    1.70
  -1 -11  11    2.60    1.90
   1 -11 -11   -3.20    2.20
   1  11 -10  103.70    4.60
  -1  11  10  103.60    5.10
  -1 -11  10  112.70    4.90
   1 -11 -10   98.40    4.90
   1  11  -9  132.70    5.70
  -1  11   9  131.40    5.80
  -1 -11   9  138.50    5.90
   1 -11  -9  136.40    6.10
   1  11  -8   88.10    4.90
  -1  11   8   99.20    5.10
  -1 -11   8   96.10    4.30
   1 -11  -8   94.60    4.90
   1  11  -7    0.70    1.90
  -1  11   7    6.30    3.50
  -1 -11   7    3.00    1.70
   1 -11  -7    0.50    2.10
   1  11  -6   35.30    2.90
  -1  11   6   41.00    4.70
  -1 -11   6   43.20    2.90
   1 -11  -6   40.60    2.80
   1  11  -5  209.20    7.90
   1  11  -5  220.00    8.90
  -1  11   5  221.20    9.20
   1 -11  -5  205.80    8.40
   1  11  -4   33.30    2.60
   1  11  -4   39.50    2.70
  -1  11   4   37.80    2.80
   1 -11  -4   39.80    2.90
   1  11  -3    7.60    2.00
   1  11  -3    4.00    1.80
  -1  11   3    5.60    1.90
  -1  11   3    3.80    1.70
   1  11  -2   92.50    4.70
   1  11  -2   90.40    4.00
  -1  11   2   80.90    4.10
  -1  11   2   84.80    4.40
   1  11  -1  144.80    6.20
   1  11  -1  148.70    6.00
  -1  11   1  139.10    6.00
  -1  11   1  144.50    6.10
   1  11   0   44.80    3.20
   1  11   0   47.10    3.00
  -1  11   0   41.80    2.70
  -1  11   0   46.20    2.70
   1  11   1   46.70    3.00
   1  11   1   49.80    3.30
  -1  11  -1   52.90    3.60
  -1  11  -1   45.70    2.90
   1  11   2  143.90    6.40
  -1  11  -2  141.40    6.20
  -1  11  -2  144.80    6.10
  -1 -11  -2  150.40    6.10
   1  11   3  245.90   10.20
  -1  11  -3  230.50    9.70
  -1  11  -3  225.70    9.50
  -1 -11  -3  231.70    9.00
   1  11   4   30.60    2.50
  -1  11  -4   26.40    2.30
  -1 -11  -4   27.80    2.50
   1 -11   4   29.60    2.20
   1  11   5   40.40    3.10
  -1  11  -5   32.20    2.40
  -1 -11  -5   29.80    2.70
   1 -11   5   30.50    2.20
   1  11   6  112.20    5.40
  -1  11  -6  106.90    4.90
  -1 -11  -6  112.40    5.50
   1 -11   6  102.10    4.60
   1  11   7  213.30    8.80
  -1  11  -7  215.60    9.80
  -1 -11  -7  221.10    9.00
   1 -11   7  218.80    9.10
   1  11   8   89.80    4.20
  -1  11  -8   87.00    4.40
  -1 -11  -8   91.90    4.50
   1 -11   8   91.50    4.50
   1  11   9   15.90    2.40
  -1  11  -9   17.60    2.30
  -1 -11  -9   14.80    2.10
   1 -11   9   18.20    2.30
   1  11  10   18.90    2.20
  -1  11 -10   16.90    2.50
  -1 -11 -10   19.20    2.20
   1 -11  10   15.60    2.70
   1  11  11   90.20    4.50
  -1  11 -11   91.00    4.50
  -1 -11 -11   88.20    4.60
   1 -11  11   93.80    5.00
   1  11  12   51.60    3.20
  -1  11 -12   49.90    3.30
   1 -11  12   48.00    3.50
   1  11  13   39.60    3.00
  -1  11 -13   40.60    3.10
   1 -11  13   33.80    3.10
   1 -11  13   37.50    2.00
   1  11  14   44.40    3.20
  -1  11 -14   41.50    3.50
   1 -11  14   44.50    3.50
   1  11  15   51.50    3.90
  -1  11 -15   45.90    3.90
   1 -11  15   46.80    3.60
   1  11  16   41.00    3.40
  -1  11 -16   45.40    3.80
  -1 -11 -16   35.70    3.40
   1 -11  16   43.30    3.50
   1  11  17   33.40    3.30
  -1  11 -17   35.40    3.90
  -1 -11 -17   29.50    3.20
   1 -11  17   34.40    3.40
   1  11  18   43.50    3.90
  -1  11 -18   40.70    4.00
  -1 -11 -18   44.60    3.70
   1 -11  18   47.80    3.70
   1  11  19   16.90    3.00
  -1  11 -19   38.50   14.10
  -1 -11 -19   16.60    2.80
   1 -11  19   13.90    3.30
   1  11  20   51.40    4.20
  -1  11 -20   57.50    5.40
  -1 -11 -20   55.40    4.90
  -1 -11 -20   53.50    4.20
   1  11  21   41.00    4.10
  -1  11 -21   63.30    5.20
  -1 -11 -21   56.80    4.40
  -1 -11 -21   52.90    4.30
  -1  11 -22   28.90    4.60
  -1 -11 -22   28.50    4.50
  -1 -11 -22   31.50    3.00
  -1  11 -23   10.10    4.10
  -1 -11 -23    7.80    3.70
  -1  11 -24    7.60    4.20
  -1 -11 -24   14.40    3.90
   1 -11  24   16.90    5.00
  -1  11 -25   15.90    4.50
  -1 -11 -25   21.30    3.80
   1 -11  25   17.90    4.30
  -1  11 -26   11.80    4.10
  -1 -11 -26   16.70    4.00
  -1  11 -27    4.40    4.60
  -1 -11 -27    6.00    4.80
  -1  11 -28   15.60    4.80
  -1 -11 -28   15.20    4.10
  -1 -11 -29    5.50    4.60
  -1 -11 -30   10.10    5.40
   1 -13 -30    0.60    3.90
   1 -13 -29   27.60    5.40
   1  13 -28    0.80    4.00
   1 -13 -28    5.70    4.70
   1  13 -27   19.70    5.20
   1 -13 -27   13.60    4.40
   1  13 -26    4.10    4.10
  -1 -13  26    0.90    4.90
   1 -13 -26   -2.50    3.10
   1  13 -25   32.20    6.20
  -1 -13  25   30.30    4.50
   1 -13 -25   26.40    3.70
   1  13 -24   -5.90    3.90
   1 -13 -24   -1.40    4.10
   1  13 -23   54.10    5.50
   1 -13 -23   52.20    4.70
   1  13 -22    1.50    4.00
   1 -13 -22   -3.20    3.40
   1 -13 -22    2.40    3.10
   1  13 -21   59.30    4.90
  -1  13  21   46.00    3.80
   1 -13 -21   51.60    4.00
   1  13 -20   -3.60    3.40
  -1  13  20   -7.00    3.00
   1 -13 -20    1.20    2.70
   1  13 -19   65.60    5.20
  -1  13  19   54.30    4.40
   1 -13 -19   56.60    4.20
   1  13 -18   -4.00    3.20
  -1  13  18    4.90    3.80
  -1 -13  18   -4.20    3.00
   1 -13 -18   -0.20    2.60
   1  13 -17   78.00    5.70
  -1  13  17   75.30    4.40
  -1 -13  17   67.90    4.90
   1 -13 -17   65.60    4.20
   1  13 -16    5.80    3.00
  -1  13  16    7.10    2.40
  -1 -13  16    7.60    3.20
  -1 -13  16    6.20    1.90
   1 -13 -16    6.40    3.00
   1  13 -15   28.70    3.10
  -1  13  15   27.70    3.00
  -1 -13  15   49.10   12.40
  -1 -13  15   34.40    3.50
   1 -13 -15   29.60    3.10
   1  13 -14    8.50    2.70
  -1  13  14   10.50    2.60
  -1 -13  14    8.30    3.10
   1 -13 -14    6.70    2.80
   1  13 -13   72.30    4.50
  -1  13  13   77.00    4.10
  -1 -13  13   73.50    4.50
   1 -13 -13   73.20    4.20
   1  13 -12    0.90    2.50
  -1  13  12   -3.30    2.20
  -1 -13  12   -3.30    2.50
   1 -13 -12   -0.80    2.40
   1  13 -11  135.30    6.10
  -1  13  11  130.90    5.80
  -1 -13  11  127.90    6.00
   1 -13 -11  130.40    6.00
   1  13 -10   36.80    3.40
  -1  13  10   42.30    3.10
  -1 -13  10   40.80    3.50
   1 -13 -10   39.10    3.20
   1  13  -9   40.50    3.30
  -1  13   9   75.70    7.50
  -1 -13   9   49.10    3.60
   1 -13  -9   46.00    3.40
   1  13  -8    8.20    2.20
  -1  13   8    9.80    2.00
  -1 -13   8   12.40    2.60
   1 -13  -8   13.80    2.70
   1  13  -7  119.90    5.60
   1  13  -7  130.40    5.90
  -1  13   7  125.80    5.70
   1 -13  -7  124.60    5.70
   1  13  -6   36.80    2.90
   1  13  -6   34.10    2.80
  -1  13   6   36.40    3.00
   1 -13  -6   39.10    3.00
   1  13  -5  148.90    6.40
   1  13  -5  152.30    6.30
  -1  13   5  161.10    6.80
   1 -13  -5  149.80    6.90
   1  13  -4    8.70    2.10
   1  13  -4    6.10    2.10
  -1  13   4    7.10    2.40
  -1  13   4   10.00    2.10
   1  13  -3  107.60    6.00
   1  13  -3  113.80    5.00
  -1  13   3  115.20    5.50
  -1  13   3  117.80    5.70
   1  13  -2   28.80    2.70
   1  13  -2   24.10    2.50
  -1  13   2   27.90    2.70
  -1  13   2   24.10    2.60
   1  13  -1  165.60    7.00
   1  13  -1  152.40    7.10
  -1  13   1  148.90    7.30
  -1  13   1  155.50    6.70
   1  13   0    8.80    2.20
   1  13   0    7.70    2.30
  -1  13   0    7.20    2.30
  -1  13   0    4.20    2.30
   1  13   1  140.90    7.20
   1  13   1  137.40    6.50
  -1  13  -1  141.50    6.50
  -1  13  -1  139.60    6.20
   1  13   2   15.20    2.60
   1  13   2    8.00    2.50
  -1  13  -2   12.60    2.50
  -1  13  -2    7.90    2.10
   1  13   3  151.40    6.50
  -1  13  -3  144.00    7.30
  -1  13  -3  156.50    6.60
  -1 -13  -3  148.80    6.30
   1  13   4   26.20    3.10
  -1  13  -4   18.90    3.80
  -1  13  -4   20.30    2.60
  -1 -13  -4   22.70    2.80
   1  13   5  202.80    8.60
  -1  13  -5  191.10    8.30
  -1 -13  -5  194.00    8.50
   1 -13   5  193.00    8.10
   1  13   6    0.20    2.00
  -1  13  -6   -3.60    2.10
  -1 -13  -6    2.60    2.10
   1 -13   6   -0.20    2.20
   1  13   7  148.70    6.60
  -1  13  -7  143.10    6.20
  -1 -13  -7  144.20    6.50
   1 -13   7  151.20    6.30
   1  13   8   19.80    2.60
  -1  13  -8   19.20    2.50
  -1 -13  -8   22.80    2.70
   1 -13   8   20.50    2.60
   1  13   9  232.40    8.90
  -1  13  -9  222.30    9.80
  -1 -13  -9  221.40    9.90
   1 -13   9  217.50    8.80
   1  13  10   18.70    2.50
  -1  13 -10   19.70    2.70
  -1 -13 -10   21.60    2.60
   1 -13  10   25.50    3.30
   1  13  11  109.70    5.50
  -1  13 -11  102.10    5.70
  -1 -13 -11  110.20    5.60
   1 -13  11  117.60    5.90
   1  13  12   19.50    3.00
  -1  13 -12   12.40    2.70
   1 -13  12   17.20    2.70
   1  13  13   21.90    2.70
  -1  13 -13   23.00    3.50
   1 -13  13   23.60    3.40
   1  13  14   92.00    5.70
  -1  13 -14  102.00    6.60
   1 -13  14   99.80    5.90
   1 -13  14   95.00    4.10
   1  13  15  112.00    5.80
  -1  13 -15  126.30    6.60
   1 -13  15  120.10    6.20
   1  13  16   12.30    2.90
  -1  13 -16   11.20    3.90
  -1 -13 -16   10.50    3.70
   1 -13  16   11.90    2.80
   1  13  17   67.50    4.50
  -1  13 -17   82.10    5.20
  -1 -13 -17   72.30    4.30
   1 -13  17   70.20    5.50
   1  13  18    3.50    2.60
  -1  13 -18    4.40    4.10
  -1 -13 -18    4.50    3.80
   1  13  19   31.60    3.60
  -1  13 -19   44.20    4.40
  -1 -13 -19   40.90    4.00
  -1  13 -20   -0.70    3.80
  -1 -13 -20   -3.10    3.40
  -1  13 -21   29.00    4.80
  -1 -13 -21   34.60    4.10
  -1 -13 -21   31.30    5.00
  -1  13 -22   18.90    4.30
  -1 -13 -22   15.90    3.70
  -1  13 -23   37.60    5.20
  -1 -13 -23   33.20    4.10
  -1  13 -24    2.90    4.60
  -1 -13 -24   -0.50    4.10
  -1  13 -25   40.30    7.00
  -1 -13 -25   37.60    4.60
  -1  13 -26    6.50    5.10
  -1 -13 -26    6.30    6.10
  -1 -13 -27    4.80    4.90
  -1 -13 -28   -4.90    5.10
   1 -15 -29    4.90    3.10
   1 -15 -28   -0.20    3.70
   1 -15 -27   11.00    4.70
   1  15 -26    1.40    4.50
   1 -15 -26    5.90    3.50
   1  15 -25    6.80    4.70
   1 -15 -25   18.60    4.90
   1  15 -24   15.90    4.60
   1 -15 -24   15.40    3.70
   1  15 -23   98.50    7.70
   1 -15 -23   93.10    5.80
   1  15 -22   14.10    4.50
   1 -15 -22   13.40    3.90
   1  15 -21   -3.20    3.80
   1 -15 -21    4.00    4.20
   1  15 -20   18.50    3.90
   1 -15 -20    7.20    3.80
   1  15 -19   59.10    4.70
  -1  15  19   45.30    4.40
   1 -15 -19   60.30    4.60
   1  15 -18    9.50    3.60
  -1  15  18   10.90    3.00
   1 -15 -18   16.70    4.40
   1  15 -17    9.50    3.90
  -1  15  17   12.10    3.10
  -1 -15  17   10.40    1.90
   1 -15 -17   14.90    3.90
   1  15 -16   19.30    4.30
  -1  15  16   20.40    2.80
  -1 -15  16   25.70    2.70
   1 -15 -16   23.70    3.20
   1  15 -15   86.20    6.10
  -1  15  15   79.90    5.10
  -1 -15  15   63.30    5.30
   1 -15 -15   73.50    4.40
   1  15 -14   15.30    3.80
  -1  15  14   12.90    3.30
  -1 -15  14   16.70    5.30
   1 -15 -14   17.00    2.80
   1  15 -13   22.40    3.00
  -1  15  13   19.40    2.90
  -1 -15  13   22.60    3.90
   1 -15 -13   24.30    3.30
   1  15 -12    9.90    2.90
  -1  15  12    8.00    2.40
  -1 -15  12   10.20    3.10
   1  15 -11   84.60    5.00
  -1  15  11   86.30    4.80
  -1 -15  11   83.40    4.80
   1 -15 -11   81.60    4.80
   1  15 -10   25.30    3.40
  -1  15  10   26.80    3.30
  -1 -15  10   27.90    3.40
   1 -15 -10   21.60    2.80
   1  15  -9   10.50    2.80
   1  15  -9    7.20    2.50
  -1  15   9    7.40    2.20
   1 -15  -9    6.70    3.10
   1  15  -8   18.90    2.80
   1  15  -8   20.60    2.70
  -1  15   8   20.80    2.80
   1 -15  -8   21.50    2.60
   1  15  -7  208.70    8.00
   1  15  -7  205.40    8.50
  -1  15   7  220.40    9.30
   1 -15  -7  216.40    9.70
   1  15  -6    4.80    2.50
   1  15  -6    2.60    2.40
  -1  15   6    1.20    2.20
   1 -15  -6    7.10    3.60
   1  15  -5    2.30    2.40
   1  15  -5    5.10    2.40
  -1  15   5    7.30    2.60
  -1  15   5    5.00    2.20
   1  15  -4   41.80    3.40
   1  15  -4   40.20    3.10
  -1  15   4   46.20    3.30
  -1  15   4   46.30    3.60
   1  15  -3  141.50    6.80
   1  15  -3  127.10    5.90
  -1  15   3  136.60    6.50
  -1  15   3  145.80    6.30
   1  15  -2   35.30    5.30
   1  15  -2   14.30    3.80
  -1  15   2   14.50    3.10
  -1  15   2   14.90    2.70
   1  15  -1   87.10    5.90
   1  15  -1   93.10    5.60
  -1  15   1   83.80    5.00
  -1  15   1   89.30    4.80
   1  15   0   38.00    3.20
   1  15   0   36.50    3.00
  -1  15   0   37.00    3.40
  -1  15   0   32.40    2.90
   1  15   1  102.80    6.00
   1  15   1  107.00    5.60
  -1  15  -1  109.70    5.40
  -1  15  -1   94.00    5.20
   1  15   2   33.40    3.20
   1  15   2   37.90    3.00
  -1  15  -2   32.90    3.20
  -1  15  -2   34.30    3.20
   1  15   3   31.50    3.00
   1  15   3   36.30    3.30
  -1  15  -3   31.70    2.90
  -1  15  -3   36.40    3.10
   1  15   4   40.50    3.40
  -1  15  -4   42.60    3.50
  -1  15  -4   39.90    3.70
  -1 -15  -4   40.70    3.20
   1  15   5  108.50    5.50
  -1  15  -5  106.10    5.70
  -1  15  -5  112.90    5.80
  -1 -15  -5  104.70    5.00
   1  15   6   38.40    3.10
  -1  15  -6   38.30    3.40
  -1  15  -6   32.40    3.00
  -1 -15  -6   37.10    3.60
   1  15   7   77.20    4.80
  -1  15  -7   76.80    4.80
  -1  15  -7   70.00    4.20
  -1 -15  -7   80.10    4.70
   1 -15   7   68.30    4.20
   1  15   8   27.70    3.20
  -1  15  -8   25.50    3.10
  -1 -15  -8   27.00    3.30
   1 -15   8   31.50    4.00
   1  15   9   32.00    3.60
  -1  15  -9   27.60    3.40
  -1 -15  -9   32.80    3.20
   1 -15   9   29.60    5.70
   1  15  10   21.50    3.90
  -1  15 -10   23.30    3.00
  -1 -15 -10   20.90    2.90
   1 -15  10   22.40    3.10
   1  15  11   97.50    5.20
  -1  15 -11   91.80    5.00
  -1 -15 -11   99.20    5.60
   1 -15  11  101.10    5.30
   1  15  12   47.80    4.10
  -1  15 -12   51.20    4.30
  -1 -15 -12   47.70    3.70
   1 -15  12   51.80    4.30
   1  15  13   73.10    4.60
  -1  15 -13   69.70    4.70
  -1 -15 -13   71.00    6.50
   1 -15  13   80.40    5.90
   1  15  14   25.70    4.70
  -1  15 -14   23.00    4.10
  -1 -15 -14   21.60    3.30
   1 -15  14   18.00    3.10
   1  15  15   46.60    3.80
  -1  15 -15   50.00    4.40
  -1 -15 -15   50.00    5.20
   1 -15  15   50.80    2.60
   1  15  16   19.80    3.10
  -1  15 -16   22.80    3.60
  -1 -15 -16   43.30    9.50
   1  15  17   30.70    3.70
  -1  15 -17   38.00    4.00
  -1 -15 -17   42.90    3.70
  -1  15 -18   10.60    3.60
  -1 -15 -18   16.10    3.70
  -1  15 -19   48.90    5.10
  -1 -15 -19   46.30    4.60
  -1  15 -20   18.90    4.70
  -1 -15 -20   21.60    4.10
  -1  15 -21   10.00    4.00
  -1 -15 -21   19.80    3.80
  -1  15 -22   15.60    5.20
  -1 -15 -22    7.70    4.10
  -1  15 -23   15.60    5.70
  -1 -15 -23   11.60    3.80
  -1  15 -24   17.40    5.50
  -1 -15 -24   20.60    4.40
  -1  15 -25   21.40    4.50
  -1 -15 -25   18.60    4.70
  -1 -15 -26   14.70    5.00
  -1 -15 -27   34.50    5.20
   1 -17 -27    0.00    2.90
   1 -17 -26    3.70    3.90
   1 -17 -25   -2.50    3.30
   1  17 -24   26.20    4.80
   1 -17 -24   27.80    4.70
   1  17 -23    7.20    4.20
   1 -17 -23   12.80    4.90
   1  17 -22    1.40    4.20
   1 -17 -22    4.30    3.50
   1  17 -21    2.40    4.10
   1 -17 -21   -0.70    3.30
   1  17 -20   40.10    4.90
   1 -17 -20   36.30    3.70
   1  17 -19   18.00    4.40
   1 -17 -19   13.00    3.60
   1  17 -18   49.80    5.00
   1 -17 -18   56.00    7.20
   1  17 -17   -2.50    3.80
  -1 -17  17   -0.80    2.30
   1 -17 -17    1.90    5.70
   1  17 -16   44.60    5.10
  -1  17  16   25.60    3.80
   1 -17 -16   44.30    4.20
   1  17 -15   -0.10    3.90
  -1  17  15   -1.50    2.70
   1 -17 -15    2.50    3.30
   1  17 -14   90.40    5.30
  -1  17  14   85.80    5.70
   1 -17 -14   99.70    5.90
   1  17 -13   42.40    4.10
  -1  17  13   40.90    3.70
   1 -17 -13   48.30    3.80
   1  17 -12   38.10    4.50
  -1  17  12   34.10    3.40
   1  17 -11    1.50    3.10
   1  17 -11    2.80    2.80
  -1  17  11    9.20    4.00
   1  17 -10   70.60    4.90
   1  17 -10   74.50    7.10
  -1  17  10   75.90    4.90
   1 -17 -10   66.90    4.60
   1  17  -9    5.80    3.40
   1  17  -9    7.60    3.30
  -1  17   9    4.30    3.00
   1 -17  -9    9.00    3.00
   1  17  -8   97.70    5.70
   1  17  -8   82.70    4.90
  -1  17   8   95.20    5.30
   1 -17  -8   87.90    5.00
   1  17  -7    6.20    3.60
   1  17  -7    4.60    3.30
  -1  17   7    8.50    3.30
  -1  17   7   14.00    4.50
   1  17  -6  145.00    6.90
   1  17  -6  148.10    6.90
  -1  17   6  149.00    7.40
  -1  17   6  159.10    9.00
   1  17  -5    9.80    3.10
   1  17  -5    6.90    3.30
  -1  17   5   11.50    3.50
  -1  17   5    3.90    2.50
   1  17  -4    9.50    3.70
   1  17  -4   16.00    3.20
  -1  17   4   19.00    3.30
  -1  17   4   14.30    2.70
   1  17  -3    9.00    3.40
   1  17  -3    9.60    3.00
  -1  17   3   10.40    3.50
  -1  17   3    6.10    3.50
   1  17  -2  169.70    8.30
   1  17  -2  156.00    7.80
  -1  17   2  178.30    8.90
  -1  17   2  169.80    8.10
   1  17  -1  164.20   31.80
   1  17  -1   50.30    4.00
  -1  17   1   59.30    4.80
  -1  17   1   53.50    3.70
   1  17   0   10.30    2.80
  -1  17   0   15.40    3.30
  -1  17   0   11.60    2.60
   1  17   1    6.10    2.90
   1  17   1    2.40    2.80
  -1  17  -1    3.70    3.30
  -1  17  -1    6.40    2.60
   1  17   2  122.80    6.10
   1  17   2  125.90    6.10
  -1  17  -2  133.80    6.90
  -1  17  -2  133.50    6.50
   1  17   3    1.90    2.70
   1  17   3   -1.20    2.80
  -1  17  -3   -0.50    3.10
  -1  17  -3   -1.50    2.60
   1  17   4    7.10    2.70
   1  17   4    3.00    2.60
  -1  17  -4    5.40    2.90
  -1  17  -4    7.60    2.70
   1  17   5   31.20    3.70
   1  17   5   26.40    3.20
  -1  17  -5   31.80    3.80
  -1  17  -5   27.90    3.20
   1  17   6  209.20    9.20
  -1  17  -6  212.30    9.80
  -1  17  -6  202.40    9.50
  -1 -17  -6  205.90    8.60
   1  17   7    2.80    2.80
  -1  17  -7   -1.90    2.90
  -1  17  -7    0.90    2.90
  -1 -17  -7   -0.30    2.80
   1  17   8   10.30    4.20
  -1  17  -8    5.80    3.10
  -1  17  -8    0.40    2.80
  -1 -17  -8    7.70    2.90
   1  17   9   15.70    3.20
  -1  17  -9   16.40    3.40
  -1  17  -9   16.40    3.80
  -1 -17  -9   12.60    3.20
   1  17  10  106.10    5.70
  -1  17 -10  107.90    6.10
  -1 -17 -10  113.70    6.00
   1 -17  10   96.90    5.80
   1  17  11   14.00    3.80
  -1  17 -11   14.50    3.70
   1 -17  11    5.20    2.80
   1  17  12   39.50    3.70
  -1  17 -12   41.10    4.30
   1  17  13   -2.10    2.80
  -1  17 -13    5.50    3.20
  -1 -17 -13    2.40    2.90
  -1  17 -14   89.10    5.50
  -1 -17 -14   80.00    5.50
  -1  17 -15    8.50    3.30
  -1 -17 -15    2.40    4.10
  -1  17 -16   23.90    3.90
  -1 -17 -16   22.90    4.00
  -1  17 -17    4.30    3.80
  -1 -17 -17    5.10    3.10
  -1  17 -18   92.10    5.80
  -1 -17 -18   95.90    6.00
  -1  17 -19   -2.40    4.80
  -1 -17 -19    3.50    4.20
  -1  17 -20    5.30    4.40
  -1 -17 -20   17.30    4.30
  -1  17 -21    6.90    4.10
  -1 -17 -21    3.00    3.50
  -1  17 -22   71.80    7.10
  -1 -17 -22   89.40    7.00
  -1 -17 -23   -1.60    3.70
  -1 -17 -24   13.40    5.50
  -1 -17 -25    6.80    3.80
   1 -19 -24   17.10    3.90
   1 -19 -23   12.00    4.10
   1 -19 -22   13.10    3.70
   1  19 -21   -0.60    4.40
   1 -19 -21   -1.50    3.20
   1  19 -20   12.50    4.20
   1 -19 -20   31.30    8.20
   1  19 -19    1.60    3.80
   1 -19 -19    9.10    4.20
   1  19 -18   33.80    4.50
   1 -19 -18   29.80    4.60
   1  19 -17    2.60    4.50
   1 -19 -17    2.80    3.40
   1  19 -16   42.30    4.50
   1 -19 -16   41.10    3.80
   1  19 -15   26.00    4.30
   1 -19 -15   28.70    4.30
   1  19 -14   28.70    4.50
   1 -19 -14   37.30    5.00
   1  19 -13    3.50    3.80
   1 -19 -13   10.60    4.40
   1  19 -12   49.30    4.50
   1 -19 -12   42.00    4.30
   1  19 -11   25.40    4.50
  -1  19  11   14.50    3.20
   1 -19 -11   19.20    3.70
   1  19 -10   42.60    4.20
  -1  19  10   37.30    3.80
   1  19  -9    2.70    3.40
  -1  19   9    9.70    3.70
   1  19  -8   64.40    5.10
  -1  19   8   55.00    4.50
   1  19  -7    0.80    3.10
  -1  19   7    6.70    3.40
  -1  19   7    4.90    2.80
   1  19  -6   10.80    3.10
  -1  19   6   14.90    3.20
  -1  19   6    7.10    3.50
   1  19  -5    4.20    3.20
   1  19  -5   -0.30    3.00
  -1  19   5    1.00    3.10
  -1  19   5    1.50    2.70
   1  19  -4   81.20    5.40
   1  19  -4   73.00    5.40
  -1  19   4   82.70    5.10
  -1  19   4   81.30    4.70
   1  19  -3   51.80    4.40
   1  19  -3   44.90    4.00
  -1  19   3   61.50    5.20
  -1  19   3   47.90    4.40
   1  19  -2   56.50    4.80
   1  19  -2   58.00    4.20
  -1  19   2   57.80    4.60
  -1  19   2   53.00    4.10
   1  19  -1   21.70    3.60
   1  19  -1   14.40    3.70
  -1  19   1   20.30    3.30
  -1  19   1   14.90    2.90
   1  19   0   82.90    5.70
   1  19   0   78.40    5.30
  -1  19   0   80.40    5.40
  -1  19   0   75.60    4.60
   1  19   1    5.60    3.20
   1  19   1    4.60    2.80
  -1  19  -1    1.70    2.80
  -1  19  -1    8.40    3.80
   1  19   2   40.90    4.20
   1  19   2   40.70    4.20
  -1  19  -2   43.10    4.20
  -1  19  -2   49.40    4.30
   1  19   3    2.50    3.20
   1  19   3    5.70    3.30
  -1  19  -3   -0.30    3.00
  -1  19  -3    2.40    3.80
   1  19   4   40.60    3.90
   1  19   4   46.40    4.60
  -1  19  -4   43.80    4.20
  -1  19  -4   35.50    4.10
   1  19   5   21.70    3.60
   1  19   5   21.90    3.30
  -1  19  -5   19.10    3.50
  -1  19  -5   19.60    6.00
   1  19   6   47.80    4.30
   1  19   6   39.30    4.30
  -1  19  -6   51.60    9.70
   1  19   7    1.60    3.60
   1  19   7   -3.20    3.00
  -1  19  -7   23.20   13.10
  -1  19  -8   19.00    3.40
  -1 -19  -8   19.70    3.30
  -1  19  -9    7.80    3.50
  -1  19 -10   51.70    4.40
  -1  19 -11    6.20    3.20
  -1 -19 -11   10.80    3.00
  -1  19 -12   60.30    4.90
  -1 -19 -12   59.40    4.50
  -1  19 -13    0.20    4.80
  -1 -19 -13   -0.20    3.00
  -1  19 -14   36.10    4.60
  -1 -19 -14   39.90    4.80
  -1  19 -15   17.60    6.80
  -1 -19 -15   17.80    3.60
  -1  19 -16   15.90    4.00
  -1 -19 -16   29.00    3.90
  -1  19 -17    9.50    4.10
  -1 -19 -17    4.80    4.70
  -1  19 -18   38.60    5.10
  -1 -19 -18   36.40    5.30
  -1  19 -19   -2.30    4.70
  -1 -19 -19   -0.40    3.60
  -1  19 -20   20.10    4.90
  -1 -19 -20   11.70    3.70
  -1 -19 -21    4.80    3.50
  -1 -19 -22   20.50    4.30
  -1 -19 -23   10.50    4.40
   1 -21 -22    5.00    3.00
   1 -21 -21    3.00    3.60
   1 -21 -20   10.80    4.30
   1 -21 -19   14.40    3.50
   1  21 -18   10.60    4.50
   1 -21 -18   16.40    4.60
   1  21 -17   15.90    4.30
   1 -21 -17    9.40    3.60
   1  21 -16   -7.90    3.90
   1 -21 -16    3.40    3.60
   1  21 -15   22.90    4.50
   1 -21 -15   24.80    3.90
   1  21 -14    7.40    3.70
   1 -21 -14    7.30    3.30
   1  21 -13   19.30    4.00
   1 -21 -13   17.50    4.30
   1  21 -12   20.30    8.10
  -1  21  12    3.70    3.00
   1  21 -11   45.40    5.00
  -1  21  11   49.70    4.90
   1  21 -10    6.50    4.00
  -1  21  10    7.80    3.90
   1  21  -9   27.90    4.20
   1  21  -8    3.50    3.50
   1  21  -7   18.00    3.90
  -1  21   7   19.80    4.40
   1  21  -6    5.60    3.60
   1  21  -5   48.20    4.70
   1  21  -4   34.10    4.30
   1  21  -3   83.70    6.40
  -1  21   3   99.90   12.90
   1  21  -2    9.80    4.30
  -1  21   2   10.10    3.20
   1  21  -1   11.10    3.90
  -1  21   1   12.50    3.30
   1  21   0   32.60    4.10
  -1  21   0   27.30    3.70
   1  21   1   38.70    4.90
  -1  21  -1   44.40    4.30
   1  21   2   10.70    4.90
  -1  21  -2   -2.40    2.90
   1  21   3   45.20    4.50
  -1  21  -3   50.60    5.50
   1  21   4   40.30    4.40
  -1  21  -4   41.50    5.50
  -1  21  -5   32.50    3.90
  -1  21  -6   14.10    3.40
  -1  21  -7   23.60    4.10
  -1  21  -8   12.80    3.80
  -1  21  -9   39.20    4.20
  -1  21 -10   -2.00    3.60
  -1 -21 -10   -2.90    3.40
  -1  21 -11   20.00    3.60
  -1 -21 -11   21.50    4.70
  -1  21 -12   33.70    4.50
  -1 -21 -12   39.00    5.50
  -1  21 -13   35.10    7.90
  -1 -21 -13   27.00    4.30
  -1  21 -14   -2.40    3.70
  -1 -21 -14    0.20    3.10
  -1  21 -15   19.10    4.80
  -1 -21 -15   17.20    4.20
  -1  21 -16    4.80    4.20
  -1 -21 -16    8.00    4.30
  -1  21 -17   27.70    5.70
  -1 -21 -17   20.90    4.90
  -1 -21 -18    2.40    3.50
  -1 -21 -19    8.60    3.30
  -1 -21 -20    3.00    3.80
   1 -23 -18    1.10    3.60
   1 -23 -17   48.20   10.00
   1 -23 -16    4.10    3.50
  -1  23  15   13.10    4.60
  -1  23  14    1.20    4.70
   1  23 -13   51.20    5.30
  -1  23  13   62.60    5.40
   1  23 -12    1.00    4.10
  -1  23  12    4.80    4.90
   1  23 -11    8.00    4.20
  -1  23  11   23.30    5.40
   1  23 -10    2.40    4.30
  -1  23  10    0.70    4.10
   1  23  -9   54.10    6.00
  -1  23   9   57.30    5.30
   1  23  -8   -1.10    3.90
  -1  23   8   12.80    4.80
   1  23  -7    1.70    3.70
  -1  23   7    3.80    3.60
   1  23  -6    3.60    4.50
  -1  23   6    4.50    3.80
   1  23  -3    4.90    3.80
  -1  23   3    6.90    3.80
   1  23  -2   -2.20    3.80
  -1  23   2   11.30    3.90
   1  23  -1   59.30    5.30
   1  23   0    6.00    4.00
  -1  23  -1   20.70    4.00
  -1  23  -2    3.50    3.60
   1  23   3   63.90    6.00
  -1  23  -3   64.00    5.20
  -1  23  -4   12.90    3.70
  -1  23  -5   20.60    3.90
   1  23   8   -1.40    4.20
  -1  23  -8   -2.10    4.10
   1  23   9   33.00    6.80
  -1  23  -9   43.70    5.90
   1  23  10   40.00   10.10
  -1  23 -10   10.40    4.00
   1  23  11   36.30    4.90
  -1  23 -11   36.60    6.50
   1  23  12    2.40    5.00
  -1  23 -12   -4.60    4.20
  -1 -23 -13   17.40    4.10
  -1 -23 -14   26.60    6.70
  -1 -23 -15    7.30    4.00
  -1 -23 -16   -3.20    3.70
  -1  25  11   -1.20    4.20
  -1  25  10   19.10    6.90
  -1  25   9   16.30    4.60
  -1  25   8   11.10    3.90
  -1  25   7    5.30    3.90
   1  25  -6   10.60    4.40
  -1  25   6    8.90    4.00
   1  25  -3   11.40    5.90
   1  25  -2   20.40    4.30
  -1  25   1   11.50    3.90
  -1  25  -2   11.90    4.70
   1  25   3   14.20    4.90
   1  25   4   31.40    4.70
  -1  25  -4   23.50    3.30
   1  25   5    5.80    3.90
   1  25   6    6.40    5.10
  -1  25  -6    9.50    4.10
   1  25   7   16.80    5.90
   1  25   8   20.10    4.60
   2   0 -34   22.60    5.00
   2   0 -33    3.00    4.80
   2   0 -32   34.40    5.60
   2   0 -31    1.30    3.40
   2   0 -30   53.20    4.40
   2   0 -29    3.30    3.10
   2   0 -28   12.30    4.70
   2   0 -28    6.40    3.50
   2   0 -27   -1.70    3.20
   2   0 -27    0.70    3.20
  -2   0  27   -6.00    3.40
   2   0 -26  189.50    8.90
   2   0 -26  183.50   10.70
  -2   0  26  169.90    8.40
   2   0 -25    1.40    2.60
   2   0 -25   -1.90    3.20
  -2   0  25   -5.50    2.70
   2   0 -24   55.10    4.00
   2   0 -24   57.40    4.90
  -2   0  24   47.20    3.80
   2   0 -23    6.60    3.20
   2   0 -23   -1.90    3.00
  -2   0  23   -4.70    2.60
   2   0 -22  132.30    6.30
   2   0 -22  128.00    7.10
  -2   0  22  131.00    6.50
   2   0 -21    1.10    2.70
   2   0 -21    1.00    2.70
  -2   0  21   -3.80    2.60
   2   0 -20   24.40    2.90
   2   0 -20   26.70    3.10
  -2   0  20   26.90    2.70
   2   0 -19   -3.20    2.10
   2   0 -19    1.20    3.60
  -2   0  19   -2.80    2.00
   2   0 -18  459.10   17.30
  -2   0  18  450.70   17.10
  -2   0  18  437.80   17.90
   2   0 -17   -2.80    2.20
  -2   0  17   -4.60    2.20
  -2   0  17   -1.30    2.00
  -2   0  16   34.90    2.50
  -2   0  16   35.80    2.70
  -2   0  15   -1.30    1.90
  -2   0  15   -3.90    2.30
  -2   0  14  571.30   20.00
  -2   0  14  550.70   20.90
  -2   0  13    0.00    1.30
  -2   0  13   -0.40    1.80
  -2   0  12  469.50   19.90
   2   0 -11   -2.00    1.70
  -2   0  11   -0.10    1.20
   2   0 -10  264.70   12.30
  -2   0  10  264.70   10.20
  -2   0  10  261.70   11.60
   2   0  -9   -2.20    1.10
  -2   0   9    0.00    1.10
  -2   0   9   -2.00    1.10
   2   0  -8   36.40    2.70
  -2   0   8   35.80    1.90
   2   0  -7   -4.50    1.10
   2   0  -7   -0.50    1.00
  -2   0   7   -0.70    0.70
  -2   0   7   -3.50    1.30
   2   0  -6  136.70    5.70
   2   0  -6  154.90    7.40
   2   0  -6  137.90    6.20
  -2   0   6  148.00    5.60
   2   0  -5   12.10    1.50
   2   0  -5    9.80    2.10
  -2   0   5   12.50    1.30
   2   0  -4  102.20    4.00
  -2   0   4  105.10    4.80
   2   0  -3   -0.20    0.30
   2   0  -3   -1.50    0.50
   2   0  -3   -1.20    0.40
  -2   0   3    0.20    0.90
   2   0  -2  524.10   16.70
  -2   0   2  502.50   18.50
  -2   0   1   -2.00    0.70
  -2   0   0  322.60   11.50
  -2   0   0  321.80   12.20
   2   0   1    2.00    0.70
  -2   0  -1   -0.20    0.40
  -2   0  -2   24.90    2.00
   2   0   4 1934.50   64.40
   2   0   5   -3.20    1.00
   2   0   6  298.90   11.70
   2   0   7   -3.60    1.10
   2   0   8  603.90   21.70
   2   0   9   -1.80    1.30
   2   0  10  166.60    7.50
   2   0  11    3.10    1.90
  -2   0 -11   -0.80    1.80
   2   0  12  947.40   32.60
   2   0  13    1.40    2.00
   2   0  14  281.60   11.00
  -2   0 -14  280.60   11.80
   2   0  15    2.60    2.30
  -2   0 -15   -2.00    1.90
   2   0  16   46.70    3.70
  -2   0 -16   36.70    3.10
   2   0  17   -0.90    2.80
  -2   0 -17    2.10    2.20
   2   0  18  147.90    6.30
  -2   0 -18  149.90    7.00
   2   0  19   -3.60    2.60
  -2   0 -19   -0.80    4.90
   2   0  20  100.40    5.40
  -2   0 -20  115.60    6.10
   2   0  21   -2.00    2.60
  -2   0 -21    0.40    3.00
   2   0  22    6.80    2.60
  -2   0 -22   10.50    3.00
   2   0  23    5.00    3.60
  -2   0 -23    1.50    3.80
  -2   0 -24  211.00    9.30
  -2   0 -25   -1.80    3.10
  -2   0 -26   31.60    4.30
  -2   0 -26   56.20   11.40
  -2   0 -27    3.10    4.00
  -2   0 -28   92.70    6.20
  -2   0 -29    1.10    4.40
  -2   0 -30   35.40    4.80
  -2   0 -31   13.20    5.90
   2   2 -34   22.20    4.70
   2  -2 -34   13.80    4.50
   2   2 -33    9.40    4.10
   2  -2 -33    9.40    3.70
   2   2 -32   16.30    5.10
   2  -2 -32   10.90    4.20
   2   2 -31   24.60    4.10
   2  -2 -31   23.60    4.90
   2   2 -30   26.90    4.20
   2  -2 -30   29.80    4.00
   2   2 -29   30.50    3.70
   2  -2 -29   34.40    4.00
   2  -2 -29   37.90    5.50
   2   2 -28   22.20    4.00
   2  -2 -28   51.10    8.00
   2  -2 -28   26.60    5.60
   2   2 -27   31.20    3.50
   2   2 -27   28.50    3.50
  -2   2  27   20.60    4.10
   2  -2 -27   25.20    4.60
   2  -2 -27   31.40    4.30
   2   2 -26   55.60    4.30
   2   2 -26   56.70    5.50
  -2   2  26   42.30    3.90
  -2  -2  26   48.30    4.50
   2  -2 -26   48.40    4.30
   2  -2 -26   49.90    5.90
   2   2 -25   41.60    4.20
   2   2 -25   46.00    4.10
  -2   2  25   38.80    3.60
  -2  -2  25   48.00    4.20
   2  -2 -25   45.40    3.90
   2   2 -24   40.60    3.50
   2   2 -24   34.90    3.50
  -2   2  24   31.10    3.70
  -2  -2  24   44.20    4.60
  -2  -2  24   40.90    3.90
   2  -2 -24   31.40    3.50
   2   2 -23   19.40    2.90
   2   2 -23   17.90    2.80
  -2   2  23   18.90    3.10
  -2  -2  23   20.50    3.40
  -2  -2  23   19.90    2.70
   2  -2 -23   15.50    3.20
   2   2 -22   36.90    3.20
   2   2 -22   36.70    3.40
  -2   2  22   35.80    3.20
  -2  -2  22   36.00    3.40
  -2  -2  22   34.70    3.10
   2  -2 -22   30.50    3.10
   2   2 -21   80.10    4.70
   2   2 -21   76.70    4.60
  -2   2  21   79.90    4.40
  -2  -2  21   82.20    4.60
  -2  -2  21   81.20    5.60
   2  -2 -21   80.30    4.80
   2   2 -20   52.50    4.10
   2   2 -20   48.20    4.40
  -2   2  20   50.00    3.40
  -2  -2  20   56.20    3.70
  -2  -2  20   46.80    3.30
   2  -2 -20   53.70    4.00
   2   2 -19    6.60    2.10
   2   2 -19    3.60    2.20
  -2   2  19    3.00    2.00
  -2  -2  19   14.70    6.30
  -2  -2  19    7.70    2.20
   2  -2 -19    5.80    2.10
   2   2 -18  150.60    6.50
   2   2 -18  139.60    7.00
  -2   2  18  143.50    5.90
  -2  -2  18  149.80    6.30
  -2  -2  18  143.40    8.10
   2  -2 -18  140.30    6.30
   2  -2 -18  146.70    8.50
   2   2 -17  213.10    8.90
   2   2 -17  206.30    8.90
  -2   2  17  209.40    8.20
  -2  -2  17  215.70    8.50
  -2  -2  17  216.00    8.70
   2  -2 -17  209.10    8.40
   2  -2 -17  201.70   10.30
   2   2 -16   19.30    2.20
   2   2 -16   21.00    2.10
  -2   2  16   19.90    2.10
  -2  -2  16   28.10    4.90
  -2  -2  16   21.50    2.70
   2  -2 -16   16.70    2.20
   2  -2 -16   23.00    2.30
   2   2 -15    7.60    1.80
   2   2 -15    4.90    1.80
  -2   2  15   10.70    1.70
  -2  -2  15    5.00    2.20
  -2  -2  15    9.00    2.10
   2  -2 -15    7.80    1.80
   2   2 -14  151.90    6.50
   2   2 -14  149.50    6.80
  -2   2  14  154.70    6.60
  -2  -2  14  150.80    6.30
  -2  -2  14  149.10    8.20
   2  -2 -14  137.80    7.20
   2   2 -13  186.00    7.90
   2   2 -13  190.50    8.00
  -2   2  13  196.80    7.60
  -2  -2  13  198.60    8.10
  -2  -2  13  191.90    8.50
   2  -2 -13  189.30    9.40
   2   2 -12  146.70    6.30
   2   2 -12  149.10    6.70
  -2   2  12  155.90    6.00
  -2  -2  12  158.80    6.40
  -2  -2  12  148.40    6.90
   2  -2 -12  153.10    6.80
   2   2 -11    4.90    1.30
   2   2 -11    5.90    1.70
  -2   2  11    7.80    1.30
  -2  -2  11    7.80    1.80
  -2  -2  11    4.40    1.50
   2  -2 -11    6.50    1.70
   2   2 -10    3.00    1.20
   2   2 -10    3.70    1.20
  -2   2  10    4.80    1.10
  -2  -2  10    3.40    1.10
  -2  -2  10    4.90    1.70
   2  -2 -10    3.60    1.30
   2   2  -9  420.40   15.70
   2   2  -9  426.00   16.20
  -2   2   9  422.60   15.10
  -2  -2   9  435.90   15.40
  -2  -2   9  432.90   16.90
   2  -2  -9  398.70   17.00
   2   2  -8  242.80    9.70
   2   2  -8  244.50   10.10
  -2   2   8  251.30    9.20
  -2  -2   8  246.90    9.50
  -2  -2   8  239.00   11.40
   2  -2  -8  241.00    9.20
   2  -2  -8  252.60   10.70
   2   2  -7    2.30    0.90
  -2   2   7    3.40    0.90
  -2  -2   7    2.80    0.90
  -2  -2   7    3.60    1.00
   2  -2  -7    1.70    0.90
   2  -2  -7    2.50    1.40
   2   2  -6  674.60   23.10
  -2   2   6  645.90   22.10
  -2  -2   6  674.00   23.20
  -2  -2   6  675.30   23.80
   2  -2  -6  638.20   22.30
   2  -2  -6  691.70   26.30
   2   2  -5  196.50    7.40
  -2   2   5  199.40    7.20
  -2  -2   5  201.80    7.10
   2  -2  -5  189.80    7.10
   2   2  -4   53.60    2.60
  -2   2   4   67.00    2.50
   2  -2  -4   53.00    2.30
   2   2  -3   78.50    3.00
   2  -2  -3   64.50    2.60
   2   2  -2  197.90    7.20
  -2  -2   1 1251.00   40.60
  -2   2   0   89.30    3.40
  -2  -2   0   94.60    3.70
  -2   2  -1   18.40    1.60
  -2  -2  -1   27.90    2.10
   2   2   2  359.60   14.50
  -2   2  -2  417.60   13.90
  -2  -2  -2  428.90   13.80
  -2   2  -3   30.60    2.00
  -2   2  -3   37.10    1.50
  -2  -2  -3   33.90    1.80
   2  -2   3   34.90    1.80
   2   2   4   15.00    1.20
  -2   2  -4   10.60    1.40
  -2  -2  -4   10.70    1.40
   2  -2   4   14.50    1.30
   2   2   5   22.20    1.60
  -2   2  -5   20.70    1.70
  -2  -2  -5   22.70    1.70
   2  -2   5   22.20    1.60
   2   2   6  913.30   31.80
  -2   2  -6  896.50   31.90
  -2  -2  -6  906.70   30.50
   2  -2   6  903.30   31.00
   2   2   7  329.70   11.90
  -2   2  -7  322.10   13.00
  -2  -2  -7  318.40   11.80
   2  -2   7  322.20   12.10
   2   2   8  281.30   10.50
  -2   2  -8  277.70   11.40
  -2  -2  -8  274.80   10.60
   2  -2   8  275.90   10.50
   2   2   9   41.30    2.30
  -2  -2  -9   41.90    2.00
   2  -2   9   42.30    2.40
   2   2  10   14.10    1.70
   2  -2  10   15.70    1.80
   2   2  11   47.30    2.90
  -2  -2 -11   54.50    2.50
   2  -2  11   51.50    3.10
   2  -2  11   45.10    3.10
   2   2  12  576.80   21.40
  -2  -2 -12  545.60   20.20
   2  -2  12  582.90   21.40
   2  -2  12  570.70   20.90
   2   2  13  133.20    5.70
  -2   2 -13  133.70    6.20
  -2  -2 -13  131.80    5.70
   2  -2  13  140.70    6.10
   2  -2  13  123.70    5.70
   2   2  14  141.90    6.30
  -2   2 -14  139.90    6.60
  -2  -2 -14  135.80    6.10
   2  -2  14  136.60    6.30
   2  -2  14  137.20    6.60
   2   2  15   93.30    4.80
  -2   2 -15   91.40    4.90
  -2  -2 -15   94.40    4.80
   2  -2  15   95.60    4.70
   2  -2  15   95.20    4.50
   2   2  16   37.10    3.20
  -2   2 -16   35.40    3.10
  -2  -2 -16   37.70    3.10
   2  -2  16   37.70    3.00
   2  -2  16   37.70    2.50
   2   2  17   54.70    3.70
  -2   2 -17   50.90    3.50
  -2  -2 -17   52.50    3.50
   2  -2  17   52.30    3.70
   2  -2  17   51.20    2.90
   2   2  18  238.70   10.00
  -2   2 -18  255.10   10.50
  -2  -2 -18  251.80   10.80
   2  -2  18  268.70   10.90
   2  -2  18  255.00    9.70
   2   2  19   65.80    5.10
  -2   2 -19   78.70    6.90
  -2   2 -19   65.40    3.80
  -2  -2 -19   56.80    4.60
   2  -2  19   69.90    5.40
   2   2  20   59.50    4.10
  -2   2 -20   61.20    4.20
  -2   2 -20   56.30    3.80
  -2  -2 -20   62.50    4.10
   2  -2  20   61.20    3.80
   2   2  21   25.30    4.00
  -2   2 -21   33.60    3.30
  -2   2 -21   32.10    3.00
  -2  -2 -21   34.40    3.80
   2  -2  21   34.50    3.80
   2   2  22   49.70    4.00
  -2   2 -22   59.10    4.90
  -2   2 -22   56.10    3.70
  -2  -2 -22   54.00    4.00
   2  -2  22   50.00    4.30
   2   2  23   57.80    4.40
  -2   2 -23   52.20    4.60
  -2   2 -23   53.30    3.60
  -2  -2 -23   50.10    4.30
   2  -2  23   55.70    6.20
  -2   2 -24   96.90    7.70
  -2   2 -24   91.90    5.30
  -2  -2 -24   96.60    7.80
  -2   2 -25    5.10    3.70
  -2   2 -25    8.00    2.60
  -2  -2 -25   13.80    4.70
  -2   2 -26   47.70    4.80
  -2  -2 -26   39.90    4.50
  -2   2 -27   42.10    4.60
  -2  -2 -27   38.40    4.20
  -2   2 -28   14.90    3.80
  -2  -2 -28   25.30    5.20
  -2   2 -29    5.40    4.10
  -2  -2 -29    2.20    4.20
  -2   2 -30   39.10    5.10
  -2  -2 -30   47.50    5.20
  -2   2 -31    2.70    4.70
  -2  -2 -31   22.00    6.00
   2  -4 -34   -0.40    3.50
   2   4 -33   16.10    3.70
   2  -4 -33    9.90    4.00
   2   4 -32    2.30    3.60
   2  -4 -32    0.70    4.30
   2   4 -31   33.40    5.20
   2  -4 -31   35.00    4.60
   2   4 -30    6.70    5.80
   2  -4 -30    1.40    3.10
   2   4 -29   59.50    5.50
   2  -4 -29   47.20    4.40
   2   4 -28   10.80    3.50
  -2  -4  28    9.10    2.80
   2  -4 -28   14.30    3.80
   2   4 -27   56.10    4.90
  -2   4  27   29.10    4.20
  -2  -4  27   49.20    3.80
   2  -4 -27   49.40    4.50
   2   4 -26    8.40    3.30
  -2   4  26    7.10    2.90
  -2  -4  26   -0.70    3.30
  -2  -4  26    8.50    3.10
   2  -4 -26    7.00    4.10
   2   4 -25   63.00    8.00
  -2   4  25   54.60    4.80
  -2  -4  25   55.70    4.20
  -2  -4  25   54.30    4.00
   2  -4 -25   60.30    4.20
   2   4 -24    7.90    3.10
  -2   4  24   11.40    2.70
  -2  -4  24   12.80    5.90
  -2  -4  24   14.40    3.00
   2  -4 -24   17.40    3.10
   2   4 -23  149.60    6.90
  -2   4  23  148.40    6.80
  -2  -4  23  142.00    7.30
  -2  -4  23  152.10    8.00
   2  -4 -23  153.70    6.90
   2   4 -22    5.90    2.70
  -2   4  22    6.80    2.80
  -2  -4  22   15.00    5.30
  -2  -4  22    8.90    2.70
   2  -4 -22   10.00    2.70
   2  -4 -22    3.80    2.30
   2   4 -21   44.50    3.80
  -2   4  21   40.60    3.30
  -2  -4  21   45.10    3.90
  -2  -4  21   43.10    3.80
   2  -4 -21   48.40    3.20
   2  -4 -21   43.70    3.30
   2   4 -20   33.60    4.10
  -2   4  20   31.50    2.70
  -2  -4  20   28.20    3.00
  -2  -4  20   28.60    3.00
   2  -4 -20   33.90    3.20
   2  -4 -20   28.60    3.10
   2   4 -19  121.60    5.80
  -2   4  19  127.10    5.80
  -2  -4  19  118.40    6.00
  -2  -4  19  127.90    6.10
   2  -4 -19  118.60    5.70
   2  -4 -19  115.70    6.30
   2   4 -18    8.90    2.70
  -2   4  18    7.20    2.30
  -2  -4  18    6.30    2.10
  -2  -4  18    6.10    2.90
   2  -4 -18    7.70    2.50
   2  -4 -18    5.60    2.30
   2   4 -17  212.40    8.70
  -2   4  17  207.50    8.00
  -2  -4  17  211.30    9.20
  -2  -4  17  218.10    9.30
   2  -4 -17  205.30    8.70
   2  -4 -17  204.60    9.60
   2   4 -16   -3.90    2.00
  -2   4  16   -0.40    1.50
  -2  -4  16   -1.60    2.30
  -2  -4  16    0.80    1.80
   2  -4 -16   -1.20    1.50
   2  -4 -16   -0.90    1.80
   2   4 -15   65.90    3.70
  -2   4  15   71.80    3.40
  -2  -4  15   75.00    3.80
  -2  -4  15   64.80    4.30
   2  -4 -15   68.70    3.60
   2  -4 -15   66.00    4.30
   2   4 -14   30.70    2.80
  -2   4  14   33.60    2.20
  -2  -4  14   32.60    2.30
  -2  -4  14   32.10    2.80
   2  -4 -14   30.60    2.20
   2  -4 -14   31.20    2.70
   2   4 -13  327.00   12.90
  -2   4  13  346.90   12.70
  -2  -4  13  354.10   13.00
   2  -4 -13  336.20   12.30
   2  -4 -13  350.90   13.70
   2   4 -12  101.70    4.90
  -2   4  12  100.10    4.30
  -2  -4  12  105.30    5.00
   2  -4 -12  101.60    4.40
   2  -4 -12  106.50    5.60
   2   4 -11  253.90   10.00
  -2   4  11  254.90    9.50
  -2  -4  11  263.80   10.10
   2  -4 -11  255.20    9.70
   2  -4 -11  258.10   11.10
   2   4 -10   54.90    3.10
  -2   4  10   55.80    2.60
  -2  -4  10   58.60    2.80
  -2  -4  10   56.30    3.00
   2  -4 -10   52.60    2.80
   2   4  -9  301.90   11.40
  -2   4   9  297.50   10.90
  -2  -4   9  306.50   11.30
  -2  -4   9  294.30   11.30
   2  -4  -9  298.20   11.20
   2   4  -8   35.50    2.00
  -2   4   8   35.10    2.10
  -2  -4   8   37.20    2.00
   2  -4  -8   34.60    2.00
   2   4  -7  145.50    6.00
  -2   4   7  151.60    5.80
  -2  -4   7  149.00    6.10
   2  -4  -7  145.30    5.90
   2   4  -6   45.70    2.40
  -2   4   6   43.90    2.30
  -2  -4   6   43.00    2.40
   2  -4  -6   40.40    2.10
   2   4  -5 1457.90   47.40
  -2   4   5 1445.50   47.70
  -2  -4   5 1448.30   49.20
   2  -4  -5 1407.00   47.40
  -2   4   4    1.50    0.80
  -2  -4   4    3.40    0.80
   2  -4  -4    2.10    2.10
   2   4  -3   56.60    2.80
  -2   4   3   64.10    2.80
  -2  -4   3   71.90    3.10
   2  -4  -3   60.10    3.50
   2   4  -2  309.10   11.30
   2   4  -2  324.90   12.00
  -2   4   2  310.80   11.80
  -2   4   2  325.20   11.70
   2   4  -1  507.20   17.80
  -2   4   1  497.50   18.40
  -2  -4   1  516.70   17.60
   2  -4  -1  493.20   18.30
   2   4   0   15.40    1.50
  -2   4   0   14.10    1.30
  -2  -4   0   14.80    1.40
   2  -4   0   16.40    1.10
   2   4   1 1529.50   51.90
  -2   4  -1 1621.30   51.10
  -2  -4  -1 1483.60   50.80
   2  -4   1 1599.00   50.30
   2   4   2   10.50    1.10
  -2   4  -2   12.30    1.30
  -2  -4  -2    9.50    1.60
   2  -4   2   11.00    1.10
   2   4   3  418.70   15.60
  -2   4  -3  422.80   15.90
  -2  -4  -3  413.90   14.50
   2  -4   3  412.30   15.00
   2   4   4   23.60    1.70
  -2   4  -4   25.90    1.90
  -2  -4  -4   21.20    1.50
   2  -4   4   24.30    1.60
   2   4   5    4.70    1.20
  -2   4  -5    6.20    1.20
  -2  -4  -5    5.20    1.20
   2  -4   5    6.10    1.10
   2   4   6    2.10    1.10
  -2   4  -6    4.40    1.20
  -2  -4  -6    4.40    1.10
   2  -4   6    6.30    1.20
   2   4   7  129.50    5.60
  -2   4  -7  126.10    5.10
  -2  -4  -7  127.10    5.30
   2  -4   7  133.20    5.40
   2   4   8    0.80    1.20
  -2   4  -8    3.20    2.00
  -2  -4  -8    0.80    1.10
   2  -4   8    1.60    1.40
   2   4   9  101.00    4.50
  -2   4  -9   97.10    4.30
  -2  -4  -9  100.90    4.40
   2  -4   9  102.10    4.70
   2   4  10   10.90    1.60
  -2   4 -10    9.90    1.70
  -2  -4 -10    9.80    1.60
   2  -4  10    9.50    1.80
   2   4  11  187.60   12.00
  -2   4 -11  150.80    6.80
  -2  -4 -11  156.00    6.50
   2  -4  11  158.90    6.80
   2   4  12    1.90    1.70
  -2   4 -12   -0.60    1.80
  -2  -4 -12   -3.60    1.90
  -2  -4 -12    1.40    1.20
   2  -4  12    2.10    1.80
   2   4  13   39.50    2.70
  -2   4 -13   38.60    3.10
  -2  -4 -13   34.70    2.80
  -2  -4 -13   37.80    2.40
   2  -4  13   39.80    2.70
   2   4  14  119.10    5.70
  -2   4 -14  111.60    5.60
  -2  -4 -14  123.60    5.30
  -2  -4 -14  115.30    5.60
   2  -4  14  117.20    5.50
   2   4  15   98.20    5.00
  -2   4 -15   82.00    4.40
  -2  -4 -15   91.80    4.80
  -2  -4 -15   96.20    4.60
   2  -4  15   91.00    4.80
   2   4  16    5.10    4.50
  -2   4 -16    6.00    2.10
  -2  -4 -16    8.80    2.40
  -2  -4 -16    3.40    1.50
   2  -4  16    4.10    2.40
   2  -4  16    2.70    1.80
   2   4  17  100.50    5.20
  -2  -4 -17   93.40    4.60
   2  -4  17   93.70    6.50
   2  -4  17   97.10    5.20
   2   4  18  123.50    5.80
  -2  -4 -18  126.50    6.30
   2  -4  18  123.30    6.00
   2  -4  18  119.80    6.10
   2   4  19   71.20    4.40
  -2   4 -19   75.30    4.90
  -2  -4 -19   73.20    4.60
   2  -4  19   77.30    5.00
   2  -4  19   73.80    4.40
   2   4  20   58.50    4.10
  -2   4 -20   54.70    4.10
  -2  -4 -20   52.90    4.00
   2  -4  20   56.50    4.00
   2  -4  20   55.60    3.90
   2   4  21   61.30    5.50
  -2   4 -21   57.60    4.30
  -2  -4 -21   62.20    4.20
   2  -4  21   69.10    8.30
   2  -4  21   59.40    3.60
   2   4  22    3.30    3.00
  -2   4 -22    7.00    3.60
  -2  -4 -22    8.30    3.20
   2  -4  22    7.20    2.90
   2  -4  22    7.70    2.60
   2   4  23   66.30    4.70
  -2   4 -23   79.90    5.60
  -2  -4 -23   73.00    4.90
   2  -4  23   57.60    5.80
   2  -4  23   74.20    4.00
  -2   4 -24   10.90    4.00
  -2  -4 -24   13.30    3.40
  -2   4 -25   65.20    4.70
  -2  -4 -25   65.90    5.40
  -2   4 -26   13.30    6.80
  -2  -4 -26   19.60    3.70
  -2   4 -27   41.60    4.60
  -2  -4 -27   42.90    5.00
  -2   4 -28   -1.00    4.40
  -2  -4 -28    0.80    3.80
  -2   4 -29   59.80    5.50
  -2  -4 -29   49.60    5.10
  -2   4 -30    7.80    3.80
  -2  -4 -30   -1.20    3.70
  -2  -4 -31   29.50    5.70
   2  -6 -34    4.40    4.40
   2   6 -33    8.90    4.30
   2  -6 -33   12.60    4.20
   2   6 -32   31.00    6.80
   2  -6 -32   10.70    4.20
   2   6 -31   10.40    3.70
   2  -6 -31   16.80    4.50
   2   6 -30   15.20    4.00
   2  -6 -30   11.20    3.40
   2   6 -29   33.50    4.10
   2  -6 -29   29.80    4.00
   2   6 -28   14.80    4.30
  -2  -6  28    7.50    3.50
   2  -6 -28   10.70    3.40
   2   6 -27   20.70    4.00
  -2  -6  27   25.90    4.00
   2  -6 -27   20.50    3.50
   2   6 -26   17.50    3.60
  -2   6  26   19.70    3.10
  -2  -6  26   21.50    3.80
   2  -6 -26   32.20    4.20
   2   6 -25   30.60    3.50
  -2   6  25   36.40    4.20
  -2  -6  25   21.80    3.70
  -2  -6  25   30.40    4.10
   2  -6 -25   31.60    3.80
   2  -6 -25   32.80    3.60
   2   6 -24   15.30    3.80
  -2   6  24   18.20    3.20
  -2  -6  24   18.20    3.80
  -2  -6  24   16.40    3.50
   2  -6 -24   14.30    3.20
   2  -6 -24   15.60    2.70
   2   6 -23   69.90    6.90
  -2   6  23   62.90    4.60
  -2  -6  23   62.10    4.80
  -2  -6  23   68.10    4.70
   2  -6 -23   64.00    5.10
   2  -6 -23   73.30    6.00
   2   6 -22   36.40    3.60
  -2   6  22   25.50    2.80
  -2  -6  22   34.30    3.70
  -2  -6  22   33.50    4.50
   2  -6 -22   34.70    3.20
   2  -6 -22   27.20    3.20
   2   6 -21   72.90    4.60
  -2   6  21   68.20    4.10
  -2  -6  21   76.00    5.90
  -2  -6  21   77.50    5.00
   2  -6 -21   74.00    4.80
   2  -6 -21   68.30    4.60
   2   6 -20    2.80    2.80
  -2   6  20   -1.00    2.40
  -2  -6  20    2.30    3.00
  -2  -6  20    2.00    3.30
   2  -6 -20   -2.10    2.10
   2  -6 -20    2.50    2.30
   2   6 -19  105.40    5.60
  -2   6  19  100.40    4.90
  -2  -6  19  103.10    5.50
  -2  -6  19  101.60    6.20
   2  -6 -19  100.50    5.90
   2  -6 -19  112.00    7.30
   2   6 -18   76.60    4.50
  -2   6  18   76.40    4.00
  -2  -6  18   83.30    4.30
  -2  -6  18   75.70    5.50
   2  -6 -18   85.90    4.20
   2  -6 -18   71.30    4.60
   2   6 -17  111.00    5.10
  -2   6  17  113.60    5.10
  -2  -6  17  121.30    5.90
   2  -6 -17  115.80    5.50
   2  -6 -17  106.60    5.50
   2   6 -16   46.70    3.10
  -2   6  16   45.70    2.70
  -2  -6  16   48.10    3.40
   2  -6 -16   48.80    3.10
   2  -6 -16   42.30    3.10
   2   6 -15   67.40    3.60
  -2   6  15   68.80    3.50
  -2  -6  15   70.00    3.90
   2  -6 -15   65.10    4.20
   2   6 -14   68.50    3.90
  -2   6  14   78.50    4.00
  -2  -6  14   69.50    3.60
   2  -6 -14   75.90    4.30
   2   6 -13   -0.30    1.90
  -2   6  13    2.30    1.40
  -2  -6  13    2.10    1.80
  -2  -6  13    2.20    1.40
   2  -6 -13    1.10    1.70
   2   6 -12   64.70    3.40
  -2   6  12   67.70    3.20
  -2  -6  12   63.00    3.30
  -2  -6  12   60.50    3.10
   2  -6 -12   62.00    3.10
   2   6 -11  764.10   26.20
  -2   6  11  792.70   26.10
  -2  -6  11  802.00   26.70
  -2  -6  11  781.50   28.90
   2  -6 -11  760.10   27.10
   2   6 -10  267.80    9.70
  -2   6  10  253.90    9.60
  -2  -6  10  254.80    9.60
   2  -6 -10  243.30    9.90
   2   6  -9   62.10    3.10
  -2   6   9   65.10    3.00
  -2  -6   9   62.20    3.30
   2  -6  -9   64.90    3.30
   2   6  -8   13.30    2.10
  -2   6   8   14.20    1.70
  -2  -6   8   14.90    1.70
   2  -6  -8   13.70    1.70
   2   6  -7  729.40   26.10
  -2   6   7  716.00   25.20
  -2  -6   7  722.80   25.30
   2  -6  -7  723.70   24.90
   2   6  -6  114.30    4.90
  -2   6   6  114.30    4.70
  -2  -6   6  123.90    5.30
   2  -6  -6  110.40    4.70
   2   6  -5   62.20    3.40
  -2   6   5   65.60    3.30
  -2  -6   5   66.70    3.10
   2  -6  -5   65.60    3.20
   2   6  -4  184.70    7.50
  -2   6   4  198.00    7.40
  -2  -6   4  191.50    7.70
   2  -6  -4  198.00    7.50
   2   6  -3  700.20   24.80
   2   6  -3  700.50   24.50
  -2   6   3  731.40   25.60
   2  -6  -3  699.80   24.40
   2   6  -2   22.00    1.70
   2   6  -2   20.20    1.90
  -2   6   2   21.90    1.70
  -2   6   2   21.50    1.60
   2   6  -1    9.20    1.60
  -2   6   1    8.30    1.20
  -2   6   1    8.80    1.10
  -2  -6   1    8.20    1.30
   2   6   0   88.10    4.10
  -2   6   0   88.20    3.80
  -2  -6   0   86.50    3.80
   2  -6   0   87.80    3.90
   2   6   1  739.30   26.50
  -2   6  -1  774.80   25.60
  -2  -6  -1  748.40   25.90
   2  -6   1  774.60   26.40
   2   6   2   -1.10    1.20
  -2   6  -2   -0.60    1.10
  -2  -6  -2   -0.40    1.60
   2  -6   2   -1.00    1.30
   2   6   3   47.90    2.70
  -2   6  -3   47.20    2.80
  -2  -6  -3   46.00    2.60
   2  -6   3   49.70    2.50
   2   6   4   55.40    2.70
  -2   6  -4   55.80    3.20
  -2  -6  -4   54.70    3.10
   2  -6   4   56.10    2.80
   2   6   5  333.40   13.10
  -2   6  -5  330.40   11.80
  -2  -6  -5  329.90   12.80
   2  -6   5  330.10   11.90
   2   6   6  104.40    4.50
  -2   6  -6  103.70    4.30
  -2  -6  -6  102.10    4.00
   2  -6   6  105.70    4.40
   2   6   7  281.00   10.50
  -2   6  -7  279.90   10.80
  -2  -6  -7  272.20    9.50
   2  -6   7  279.90   10.10
   2   6   8    0.90    1.40
  -2   6  -8   -0.30    1.50
  -2  -6  -8    2.60    1.40
   2  -6   8   -0.10    1.40
   2   6   9  302.50   13.60
  -2   6  -9  283.80   11.60
  -2  -6  -9  284.20   10.20
   2  -6   9  295.80   11.60
   2   6  10  119.80    7.60
  -2   6 -10  104.90    5.00
  -2  -6 -10  105.50    4.60
   2  -6  10  112.90    5.00
   2   6  11    0.40    1.70
  -2   6 -11    1.00    1.80
   2  -6  11    0.70    1.70
   2   6  12   34.80    2.70
  -2   6 -12   30.20    3.90
   2  -6  12   37.00    2.90
   2   6  13  153.60    6.60
  -2   6 -13  142.20    6.60
  -2  -6 -13  148.90    6.10
   2  -6  13  156.10    6.80
   2   6  14   49.10    3.70
  -2   6 -14   49.90    3.40
  -2  -6 -14   52.20    3.00
   2  -6  14   54.70    3.60
   2   6  15   11.30    2.50
  -2   6 -15    5.60    2.70
  -2  -6 -15   10.50    2.30
  -2  -6 -15    7.20    1.70
   2  -6  15   10.80    2.40
   2   6  16   30.10    2.80
  -2   6 -16   25.00    2.90
  -2  -6 -16   31.10    3.10
  -2  -6 -16   27.30    2.40
   2  -6  16   25.80    3.10
   2   6  17  153.60    6.50
  -2   6 -17  155.20    7.20
  -2  -6 -17  154.50    7.10
  -2  -6 -17  154.70    6.90
   2  -6  17  153.60    7.10
   2   6  18    4.90    3.10
  -2   6 -18    2.60    2.70
  -2  -6 -18   -0.90    2.90
  -2  -6 -18    2.70    2.60
   2  -6  18    2.50    2.40
   2   6  19   21.00    3.90
  -2   6 -19   15.50    3.30
  -2  -6 -19   21.20    2.70
  -2  -6 -19   18.10    2.10
   2  -6  19   20.60    3.70
   2  -6  19   21.30    2.80
   2   6  20   12.80    3.10
  -2   6 -20    5.80    3.10
  -2  -6 -20   11.10    3.20
  -2  -6 -20    8.50    1.70
   2  -6  20    9.90    2.80
   2  -6  20   10.10    2.20
   2   6  21   90.90    5.10
  -2   6 -21   88.10    5.60
  -2  -6 -21   85.90    5.10
   2  -6  21   81.40    5.30
   2  -6  21   85.50    5.40
   2   6  22    6.00    3.50
  -2   6 -22   13.30    3.50
  -2  -6 -22    6.60    3.10
   2  -6  22    7.50    3.10
   2  -6  22    8.10    2.50
   2   6  23   17.80    4.00
  -2   6 -23   31.20    3.90
  -2  -6 -23   29.30    3.80
   2  -6  23   30.60    3.30
  -2   6 -24    9.40    4.00
  -2  -6 -24   15.20    4.20
   2  -6  24   10.00    2.70
  -2   6 -25   64.40    8.10
  -2  -6 -25   67.30    5.30
  -2   6 -26    0.10    5.00
  -2  -6 -26    2.50    3.50
  -2   6 -27   27.40    5.90
  -2  -6 -27   13.40    4.70
  -2   6 -28    6.80    4.00
  -2  -6 -28   10.10    5.00
  -2   6 -29   23.50    4.50
  -2  -6 -29   29.50    5.10
  -2   6 -30    3.40    4.10
  -2  -6 -30    3.00    4.00
  -2  -6 -31   19.10    4.50
   2  -8 -33    2.90    4.80
   2   8 -32   26.20    5.40
   2  -8 -32   20.50    4.50
   2   8 -31    3.30    3.90
   2  -8 -31    4.10    3.70
   2   8 -30   14.90    4.30
   2  -8 -30   18.00    4.30
   2   8 -29    3.80    3.50
   2  -8 -29    1.20    3.50
   2   8 -28   62.00    5.60
  -2  -8  28   53.00    5.10
   2  -8 -28   55.00    4.40
   2   8 -27    4.00    3.70
  -2  -8  27   -0.30    2.90
   2  -8 -27    1.60    4.00
   2   8 -26   17.20    4.50
  -2   8  26    1.90    3.00
  -2  -8  26   16.30    4.70
   2  -8 -26    4.80    3.50
   2   8 -25    5.70    3.50
  -2   8  25   50.20   12.30
  -2  -8  25    5.50    2.70
   2  -8 -25    4.60    3.50
   2  -8 -25    5.20    4.10
   2   8 -24  102.00    8.30
  -2   8  24   93.80    5.70
  -2  -8  24  101.70    7.00
   2  -8 -24  109.60    5.60
   2  -8 -24   93.50    6.20
   2   8 -23   11.30    3.50
  -2   8  23   13.20    3.20
  -2  -8  23   10.20    3.50
  -2  -8  23   16.50    3.00
   2  -8 -23    6.80    3.10
   2  -8 -23   10.10    2.80
   2   8 -22   37.30    4.20
  -2   8  22   37.40    3.80
  -2  -8  22   31.10    4.00
  -2  -8  22   36.30    4.80
   2  -8 -22   45.30    4.50
   2  -8 -22   34.00    3.10
   2   8 -21    8.10    2.90
  -2   8  21    8.50    2.70
  -2  -8  21   12.50    3.10
  -2  -8  21   12.50    4.00
   2  -8 -21   14.40    2.70
   2  -8 -21   13.10    2.70
   2   8 -20  187.80    8.30
  -2   8  20  173.80    7.30
  -2  -8  20  183.90    8.80
  -2  -8  20  190.70   10.30
   2  -8 -20  175.20    8.20
   2  -8 -20  180.20    8.60
   2   8 -19    1.60    2.60
  -2   8  19    2.10    2.20
  -2  -8  19    0.50    2.50
   2  -8 -19    2.80    2.60
   2  -8 -19    4.70    2.50
   2   8 -18   11.10    3.20
  -2   8  18   14.40    2.50
  -2  -8  18   11.90    3.80
   2  -8 -18   16.20    4.80
   2  -8 -18   11.70    2.70
   2   8 -17    0.20    2.40
  -2   8  17    0.30    1.90
  -2  -8  17    3.40    2.60
   2  -8 -17    2.10    1.90
   2  -8 -17    4.10    2.80
   2   8 -16  192.90    7.80
  -2   8  16  174.00    6.80
  -2  -8  16  178.60    7.90
   2   8 -15   38.40    3.20
  -2   8  15   41.80    2.80
  -2  -8  15   39.60    3.10
   2   8 -14   71.00    4.40
  -2   8  14   75.00    4.00
  -2  -8  14   74.90    3.90
  -2  -8  14   74.80    3.90
   2   8 -13   42.50    3.00
  -2   8  13   37.00    2.50
  -2  -8  13   36.90    2.60
  -2  -8  13   40.60    3.00
   2   8 -12  178.70    7.80
  -2   8  12  181.60    7.70
  -2  -8  12  186.00    6.90
   2  -8 -12  182.00    7.60
   2   8 -11    1.40    1.90
  -2   8  11    0.40    1.30
  -2  -8  11    1.70    2.00
   2  -8 -11   -3.60    1.80
   2   8 -10  228.90    9.60
  -2   8  10  233.90    8.80
  -2  -8  10  227.30    8.90
   2  -8 -10  233.40    9.30
   2   8  -9   28.10    2.30
  -2   8   9   26.60    2.20
  -2  -8   9   30.70    2.40
   2  -8  -9   26.40    2.00
   2   8  -8  306.70   11.70
  -2   8   8  316.00   11.60
  -2  -8   8  314.10   11.80
   2  -8  -8  313.00   11.30
   2   8  -7  113.70    5.30
  -2   8   7  113.00    5.00
  -2  -8   7  116.70    5.10
   2  -8  -7  120.00    5.50
   2   8  -6  489.60   17.30
  -2   8   6  484.50   19.80
  -2  -8   6  496.80   18.00
   2  -8  -6  492.40   18.00
   2   8  -5    2.50    2.10
  -2   8   5    2.10    1.60
  -2  -8   5    4.80    2.20
   2  -8  -5    6.70    2.30
   2   8  -4  295.20   11.40
   2   8  -4  318.40   11.60
  -2   8   4  303.60   11.80
   2  -8  -4  309.50   12.00
   2   8  -3    4.90    2.60
   2   8  -3    2.40    1.80
  -2   8   3    1.50    1.70
   2  -8  -3    4.90    1.60
   2   8  -2  198.20    7.80
   2   8  -2  197.30    8.00
  -2   8   2  196.60    8.90
  -2   8   2  210.90    8.20
   2   8  -1    4.00    1.60
  -2   8   1    4.20    1.80
  -2   8   1    2.70    1.60
  -2  -8   1    9.10    2.40
   2   8   0  308.20   11.30
  -2   8   0  290.60   12.30
  -2   8   0  291.30   10.80
  -2  -8   0  295.70   11.60
   2   8   1  118.30    5.30
  -2   8  -1  116.40    5.00
  -2  -8  -1  117.10    5.40
   2  -8   1  114.80    5.30
   2   8   2  131.30    5.90
  -2   8  -2  125.00    5.30
  -2  -8  -2  124.90    5.50
   2  -8   2  129.10    5.90
   2   8   3    6.50    1.50
  -2   8  -3    4.80    1.40
  -2  -8  -3    6.50    1.80
   2  -8   3    6.20    1.60
   2   8   4  145.40    6.20
  -2   8  -4  147.00    6.30
  -2  -8  -4  142.20    5.60
   2  -8   4  145.90    6.40
   2   8   5   45.60    2.60
  -2   8  -5   46.80    2.80
  -2  -8  -5   46.90    3.10
   2  -8   5   47.00    2.80
   2   8   6  321.70   12.40
  -2   8  -6  322.60   13.50
  -2  -8  -6  330.60   11.90
   2  -8   6  324.10   11.60
   2   8   7   45.30    2.70
  -2   8  -7   42.90    3.00
  -2  -8  -7   46.50    2.90
   2  -8   7   42.00    2.80
   2   8   8    5.00    1.60
  -2   8  -8    5.40    1.70
  -2  -8  -8    2.60    1.70
   2  -8   8    6.50    2.10
   2   8   9   59.20    3.20
  -2   8  -9   59.50    3.10
  -2  -8  -9   53.30    3.10
   2  -8   9   62.60    3.10
   2   8  10   72.40    4.00
  -2   8 -10   67.00    3.60
  -2  -8 -10   66.20    3.50
   2  -8  10   71.10    3.70
   2   8  11   10.50    1.80
  -2   8 -11   11.70    2.50
  -2  -8 -11   13.70    2.00
   2  -8  11   15.50    2.20
   2   8  12  217.90    9.20
  -2   8 -12  215.50    9.00
   2  -8  12  222.20    8.80
   2   8  13   29.10    2.40
  -2   8 -13   30.60    2.90
  -2  -8 -13   24.10    2.30
   2  -8  13   29.40    3.20
   2   8  14   29.10    5.00
  -2   8 -14   24.60    2.90
  -2  -8 -14   22.70    2.50
   2  -8  14   24.90    2.70
   2   8  15   63.70    3.70
  -2   8 -15   66.90    4.50
  -2  -8 -15   61.10    3.70
   2  -8  15   72.70    4.30
   2   8  16   50.50    4.00
  -2   8 -16   44.40    3.60
  -2  -8 -16   48.30    3.50
   2  -8  16   51.50    3.60
   2   8  17   -2.30    2.20
  -2   8 -17    4.10    3.00
  -2  -8 -17    2.40    2.50
  -2  -8 -17    0.00    1.70
   2  -8  17    0.00    2.50
   2   8  18  162.70   15.40
  -2   8 -18  147.10    7.00
  -2  -8 -18  134.90    6.20
  -2  -8 -18  134.40    6.70
   2  -8  18  193.00   14.60
   2   8  19    0.60    2.90
  -2   8 -19   -2.40    3.00
  -2  -8 -19   -2.30    2.60
  -2  -8 -19    0.00    1.90
   2  -8  19    1.20    2.90
   2   8  20   50.50    4.10
  -2   8 -20   62.40    5.80
  -2  -8 -20   56.90    4.10
  -2  -8 -20   45.80    3.40
   2  -8  20   54.60    4.10
   2   8  21   25.50    3.60
  -2   8 -21   30.80    3.80
  -2  -8 -21   35.30    4.50
  -2  -8 -21   32.20    3.30
   2  -8  21   20.10    3.60
   2  -8  21   28.00    4.00
   2   8  22   41.50    4.90
  -2   8 -22   46.80    4.80
  -2  -8 -22   39.80    3.50
  -2  -8 -22   41.80    3.10
   2  -8  22   44.10    4.30
  -2   8 -23   -1.70    3.60
  -2  -8 -23    0.80    3.10
  -2  -8 -23   -0.80    1.80
   2  -8  23    2.40    2.70
  -2   8 -24   14.20    4.00
  -2  -8 -24   16.40    3.70
   2  -8  24   14.00    2.70
  -2   8 -25    4.10    4.30
  -2  -8 -25   -0.50    4.40
  -2   8 -26   58.20    6.80
  -2  -8 -26   65.10    7.40
  -2   8 -27   -1.50    3.80
  -2  -8 -27    1.60    4.10
  -2   8 -28    8.00    4.50
  -2  -8 -28    7.10    3.70
  -2   8 -29    5.40    4.70
  -2  -8 -29    6.60    6.40
  -2  -8 -30   19.70    4.40
   2 -10 -33   -2.90    3.40
   2 -10 -32   14.80    4.60
   2  10 -31   -5.50    4.00
   2 -10 -31    8.90    6.30
   2  10 -30    8.80    4.50
   2 -10 -30   18.30    7.00
   2  10 -29   11.40    4.00
   2 -10 -29    5.50    3.50
   2  10 -28   27.80    4.80
   2 -10 -28   21.40    3.60
   2  10 -27    4.80    4.30
  -2 -10  27    3.90    3.30
   2 -10 -27    7.50    3.20
   2  10 -26   55.80    5.90
  -2 -10  26   50.30    5.20
   2 -10 -26   47.10    4.40
   2  10 -25   18.50    4.40
  -2  10  25    7.40    4.40
  -2 -10  25   14.20    4.20
   2 -10 -25   14.40    3.60
   2 -10 -25   14.90    3.30
   2  10 -24   31.50    5.10
  -2  10  24   31.10    4.20
  -2 -10  24   32.90    4.50
   2 -10 -24   26.60    3.20
   2 -10 -24   32.30    3.60
   2  10 -23    5.30    3.70
  -2  10  23    3.80    2.90
  -2 -10  23    6.70    4.20
   2 -10 -23    4.90    2.50
   2 -10 -23    1.80    2.60
   2  10 -22   29.20    4.20
  -2  10  22   26.00    3.30
  -2 -10  22   20.80    3.60
   2 -10 -22   28.70    3.60
   2 -10 -22   25.10    3.40
   2  10 -21    6.50    3.10
  -2  10  21    6.00    2.70
  -2 -10  21    6.70    4.10
   2 -10 -21    4.40    2.50
   2 -10 -21    2.70    2.20
   2  10 -20  138.60    6.70
  -2  10  20  137.00    6.30
  -2 -10  20  132.40    7.10
   2 -10 -20  130.50    6.20
   2 -10 -20  129.60    6.80
   2  10 -19   38.20    4.80
  -2  10  19   37.70    3.10
  -2 -10  19   40.40    3.60
   2 -10 -19   35.40    3.20
   2 -10 -19   36.80    3.60
   2  10 -18   83.50    4.70
  -2  10  18   80.80    4.00
  -2 -10  18   75.50    5.60
   2 -10 -18   82.90    5.20
   2  10 -17    1.60    5.20
  -2  10  17   -1.30    2.60
  -2 -10  17   -2.10    3.00
   2 -10 -17   -1.70    3.60
   2  10 -16   64.50    4.00
  -2  10  16   65.00    4.00
  -2 -10  16   64.60    3.90
  -2 -10  16   64.60    3.70
   2 -10 -16   65.00    5.70
   2  10 -15   33.40    3.10
  -2  10  15   37.40    2.90
  -2 -10  15   35.90    3.30
  -2 -10  15   39.50    2.70
   2 -10 -15   34.30    2.80
   2  10 -14   42.20    3.30
  -2  10  14   44.20    3.00
  -2 -10  14   46.20    3.30
  -2 -10  14   46.00    3.40
   2 -10 -14   40.60    3.10
   2  10 -13    0.90    2.10
  -2  10  13   -0.20    1.60
  -2 -10  13   -0.60    1.90
   2 -10 -13    0.60    2.10
   2  10 -12  115.50    5.90
  -2  10  12  112.30    5.10
  -2 -10  12  115.70    5.20
   2 -10 -12  114.90    5.40
   2  10 -11   18.50    2.30
  -2  10  11   20.30    2.20
  -2 -10  11   17.80    2.10
   2 -10 -11   16.90    2.20
   2  10 -10   70.10    3.70
  -2  10  10   79.20    4.00
  -2 -10  10   80.70    3.90
   2 -10 -10   74.00    3.90
   2  10  -9   14.30    2.30
  -2  10   9   12.30    1.90
  -2 -10   9   17.00    1.90
   2 -10  -9   15.30    1.90
   2  10  -8  164.40    6.90
  -2  10   8  170.70    7.10
  -2 -10   8  168.50    6.50
   2 -10  -8  164.80    7.20
   2  10  -7    9.40    2.10
  -2  10   7   11.90    2.00
  -2 -10   7   12.00    2.00
   2 -10  -7   10.90    2.00
   2  10  -6  176.50    7.90
  -2  10   6  192.70    7.40
  -2 -10   6  189.20    7.40
   2 -10  -6  181.60    7.80
   2  10  -5    6.10    2.10
   2  10  -5    9.90    1.90
  -2  10   5    8.00    1.70
   2 -10  -5   10.80    3.10
   2  10  -4  163.30    6.80
   2  10  -4  167.30    6.70
  -2  10   4  167.90    6.70
   2 -10  -4  178.10    6.60
   2  10  -3  240.10    9.20
   2  10  -3  244.10    8.90
  -2  10   3  235.50    9.30
  -2  10   3  244.20    9.30
   2  10  -2  303.30   11.50
   2  10  -2  312.20   11.80
  -2  10   2  303.70   12.30
  -2  10   2  313.50   12.40
   2  10  -1    8.20    2.20
   2  10  -1    3.90    2.50
  -2  10   1    2.40    2.30
  -2  10   1    1.30    1.60
   2  10   0  116.90    5.50
  -2  10   0  113.10    5.60
  -2  10   0  112.30    5.10
  -2 -10   0  114.60    5.40
   2  10   1   59.00    3.70
  -2  10  -1   47.50    3.10
  -2  10  -1   49.00    3.00
  -2 -10  -1   63.20    3.50
   2  10   2  341.70   12.90
  -2  10  -2  330.40   12.50
  -2 -10  -2  325.60   13.30
   2 -10   2  337.40   12.80
   2  10   3    4.70    2.10
  -2  10  -3    1.60    1.90
  -2 -10  -3    5.50    2.10
   2 -10   3    1.40    2.10
   2  10   4  136.70    6.60
  -2  10  -4  142.80    7.10
  -2 -10  -4  144.40    6.40
   2 -10   4  140.60    6.40
   2  10   5  169.40    7.10
  -2  10  -5  162.20    6.80
  -2 -10  -5  174.20    7.00
   2 -10   5  161.10    7.60
   2  10   6  259.00   10.10
  -2  10  -6  261.40   11.00
  -2 -10  -6  255.10    9.60
   2 -10   6  257.10    9.90
   2  10   7   19.10    2.20
  -2  10  -7   15.80    2.30
  -2 -10  -7   17.40    2.30
   2 -10   7   21.60    2.20
   2  10   8   57.70    3.10
  -2  10  -8   62.10    3.40
  -2 -10  -8   63.90    3.60
   2 -10   8   61.20    3.50
   2  10   9   48.50    3.30
  -2  10  -9   51.60    3.00
  -2 -10  -9   50.20    3.00
   2 -10   9   45.20    3.20
   2  10  10  322.00   12.20
  -2  10 -10  328.90   14.00
  -2 -10 -10  311.90   11.60
   2 -10  10  331.30   12.00
   2  10  11   21.00    2.50
  -2  10 -11   20.40    2.40
  -2 -10 -11   21.80    2.40
   2 -10  11   21.90    2.70
   2 -10  11   20.90    1.20
   2  10  12   18.20    4.60
  -2  10 -12    8.10    2.50
  -2 -10 -12   13.40    2.20
   2 -10  12   11.80    3.10
   2  10  13   16.00    2.40
  -2  10 -13   20.60    2.90
  -2 -10 -13   16.50    2.70
   2 -10  13   21.90    2.90
   2  10  14   84.60    4.40
  -2  10 -14   90.60    5.20
  -2 -10 -14   85.80    4.50
   2 -10  14   88.20    4.60
   2  10  15    6.10    3.20
  -2  10 -15    1.60    2.70
  -2 -10 -15    4.30    2.60
   2 -10  15   -4.50    2.70
   2  10  16   78.70    4.60
  -2  10 -16   72.00    5.00
  -2 -10 -16   72.10    4.50
   2 -10  16   75.40    4.60
   2  10  17   86.00   15.10
  -2  10 -17   38.20    3.60
  -2 -10 -17   37.00    3.10
   2 -10  17   37.00    3.70
   2  10  18   56.40    3.90
  -2  10 -18   63.00    4.90
  -2 -10 -18   58.20    4.20
   2 -10  18   52.00    4.50
   2  10  19   19.00    3.40
  -2  10 -19  112.80   20.70
  -2 -10 -19   27.20    4.70
  -2 -10 -19   19.30    2.70
   2 -10  19   15.60    3.40
   2  10  20   63.30    4.70
  -2  10 -20   67.40    5.10
  -2 -10 -20   67.90    4.90
  -2 -10 -20   60.50    3.90
   2  10  21    1.30    3.30
  -2  10 -21   11.90    4.20
  -2 -10 -21    5.80    2.80
  -2 -10 -21    5.30    2.60
  -2  10 -22   51.50    4.70
  -2 -10 -22   48.00    4.10
  -2 -10 -22   41.50    3.60
  -2  10 -23    2.10    4.00
  -2 -10 -23    9.20    3.20
   2 -10  23    5.00    3.50
  -2  10 -24   11.20    4.10
  -2 -10 -24   20.90    4.60
   2 -10  24   18.50    4.40
  -2  10 -25   29.40    4.90
  -2 -10 -25   39.50    7.30
  -2  10 -26   25.90    4.60
  -2 -10 -26   23.90    4.70
  -2  10 -27    4.80    4.50
  -2 -10 -27    2.50    3.40
  -2  10 -28    6.60    4.40
  -2 -10 -28    6.80    4.00
  -2 -10 -29    3.60    3.90
   2 -12 -31   15.40    5.50
   2 -12 -30   13.10    6.70
   2  12 -29   18.70    4.80
   2 -12 -29   23.60    6.00
   2  12 -28    3.40    4.70
   2 -12 -28    2.90    4.20
  -2 -12  27   13.30    5.30
   2 -12 -27   16.60    4.50
   2  12 -26   17.60    5.00
  -2 -12  26   15.60    3.90
   2 -12 -26   22.90    3.90
   2  12 -25   21.50    4.50
  -2 -12  25   23.50    4.40
   2 -12 -25   28.20    3.40
   2  12 -24   -4.30    3.60
  -2 -12  24   -1.90    3.50
   2 -12 -24    2.40    3.40
   2 -12 -24    3.00    3.40
   2  12 -23   66.30    5.00
  -2  12  23   46.00    4.50
   2 -12 -23   59.40    4.40
   2 -12 -23   57.20    5.10
   2  12 -22    4.60    3.50
  -2  12  22    2.80    2.60
   2 -12 -22    8.90    3.40
   2 -12 -22   11.60    3.80
   2  12 -21  102.80    6.10
  -2  12  21   85.20    5.40
   2 -12 -21   89.50    5.00
   2 -12 -21   94.40    5.50
   2  12 -20    6.40    3.30
  -2  12  20   11.80    2.90
  -2 -12  20    9.40    6.20
   2 -12 -20   10.20    2.80
   2  12 -19   55.60    4.20
  -2  12  19   64.40    5.20
  -2 -12  19   50.90    4.60
   2 -12 -19   57.40    4.30
   2  12 -18   21.50    3.50
  -2  12  18   28.40    3.70
  -2 -12  18   24.60    3.30
   2 -12 -18   24.60    3.00
   2  12 -17   25.80    5.00
  -2  12  17   17.20    2.60
  -2 -12  17   24.00    4.00
  -2 -12  17   21.20    2.50
   2 -12 -17   20.90    3.10
   2  12 -16    1.00    2.60
  -2  12  16    2.10    2.10
  -2 -12  16    4.20    3.00
  -2 -12  16    1.80    1.90
   2 -12 -16    9.70    2.80
   2  12 -15  193.60    8.00
  -2  12  15  191.50    8.30
  -2 -12  15  189.40    8.10
  -2 -12  15  194.20    8.80
   2 -12 -15  196.60    8.00
   2  12 -14   79.30    4.80
  -2  12  14   79.80    4.20
  -2 -12  14   90.00    5.00
   2 -12 -14   96.60    6.70
   2  12 -13   37.10    3.20
  -2  12  13   40.30    3.00
  -2 -12  13   39.60    3.00
   2 -12 -13   35.00    2.70
   2  12 -12    2.40    2.20
  -2  12  12    1.40    1.90
  -2 -12  12    4.90    2.40
   2 -12 -12    0.80    2.40
   2  12 -11   81.60    4.40
  -2  12  11   72.80    3.80
  -2 -12  11   76.30    3.80
   2 -12 -11   69.30    3.90
   2  12 -10   51.60    3.80
  -2  12  10   54.70    3.30
  -2 -12  10   52.00    3.20
   2 -12 -10   55.10    3.20
   2  12  -9  143.50    6.10
  -2  12   9  146.40    5.90
  -2 -12   9  143.30    6.60
   2 -12  -9  143.60    6.80
   2  12  -8   29.20    2.80
  -2  12   8   30.40    2.70
  -2 -12   8   30.50    2.60
   2 -12  -8   34.20    2.70
   2  12  -7  200.90    8.50
   2  12  -7  213.60    9.10
  -2  12   7  205.50    8.20
   2 -12  -7  207.20    8.90
   2  12  -6   10.70    2.60
   2  12  -6   14.70    2.10
  -2  12   6   14.20    2.20
   2 -12  -6   14.80    2.50
   2  12  -5   22.00    2.60
   2  12  -5   17.30    2.20
  -2  12   5   23.70    2.60
   2 -12  -5   20.20    2.10
   2  12  -4    7.80    3.10
   2  12  -4   12.70    2.40
  -2  12   4    8.80    2.00
  -2  12   4   17.30    3.60
   2  12  -3  201.60    9.10
   2  12  -3  204.80    8.50
  -2  12   3  198.30    7.90
  -2  12   3  218.50    8.80
   2  12  -2   31.90    3.00
   2  12  -2   33.60    3.10
  -2  12   2   35.50    2.90
  -2  12   2   38.30    4.40
   2  12  -1   32.30    2.70
   2  12  -1   31.10    2.90
  -2  12   1   29.40    2.50
  -2  12   1   29.20    2.60
   2  12   0  207.50    8.40
   2  12   0  194.20    8.40
  -2  12   0  197.90    8.50
  -2  12   0  194.70    7.80
   2  12   1   98.90    4.60
  -2  12  -1   96.80    5.20
  -2  12  -1   97.60    4.50
  -2 -12  -1   93.30    4.70
   2  12   2   14.60    2.50
  -2  12  -2   17.50    2.30
  -2  12  -2   15.60    2.30
  -2 -12  -2   19.10    2.50
   2  12   3  235.40    9.10
  -2  12  -3  242.50   10.80
  -2  12  -3  234.90   10.10
  -2 -12  -3  220.50    8.70
   2  12   4   35.50    2.90
  -2  12  -4   33.70    2.70
  -2 -12  -4   35.50    3.20
   2 -12   4   36.10    2.80
   2  12   5  129.90    6.00
  -2  12  -5  118.80    5.40
  -2 -12  -5  119.10    5.10
   2 -12   5  126.20    6.00
   2  12   6   97.30    4.70
  -2  12  -6   96.90    5.00
  -2 -12  -6   98.40    5.00
   2 -12   6   93.80    4.50
   2  12   7  128.60    6.40
  -2  12  -7  119.20    5.50
  -2 -12  -7  124.30    5.80
   2 -12   7  125.70    5.20
   2  12   8   47.40    3.30
  -2  12  -8   43.60    3.60
  -2 -12  -8   43.50    3.50
   2 -12   8   50.70    3.30
   2  12   9  198.30    8.90
  -2  12  -9  192.00    8.50
  -2 -12  -9  191.60    7.80
   2 -12   9  196.80    8.10
   2  12  10    9.70    2.30
  -2  12 -10   10.00    2.60
  -2 -12 -10   11.60    2.30
   2 -12  10    8.10    2.40
   2  12  11   43.10    3.30
  -2  12 -11   39.00    3.40
  -2 -12 -11   39.70    3.10
   2 -12  11   43.90    3.20
   2  12  12   73.50    4.20
  -2  12 -12   57.40    4.30
   2 -12  12   62.10    3.60
   2  12  13   66.80    4.00
  -2  12 -13   66.00    4.30
   2 -12  13   71.70    4.50
   2  12  14   18.10    4.40
  -2  12 -14   15.00    3.40
  -2 -12 -14   14.20    2.60
   2 -12  14   11.80    2.80
   2  12  15  171.70   16.90
  -2  12 -15  126.10    6.70
  -2 -12 -15  112.20    5.80
   2 -12  15  115.20    6.30
   2  12  16   22.90    2.90
  -2  12 -16   30.20    4.20
  -2 -12 -16   26.90    3.40
   2 -12  16   22.10    3.70
   2  12  17   75.30    4.60
  -2  12 -17   72.10    4.90
  -2 -12 -17   80.00    6.80
   2 -12  17   71.00    4.90
   2  12  18    5.30    2.90
  -2  12 -18   11.30    6.20
  -2 -12 -18    4.30    3.00
   2  12  19   39.20    4.00
  -2  12 -19   41.40    5.20
  -2 -12 -19   42.30    3.50
  -2  12 -20   16.20    4.40
  -2 -12 -20   16.00    3.40
  -2  12 -21   65.90    5.70
  -2 -12 -21   69.10    5.40
  -2 -12 -21   65.70    4.90
  -2  12 -22    2.20    4.20
  -2 -12 -22    1.00    3.20
  -2  12 -23   17.50    5.30
  -2 -12 -23   17.20    3.80
  -2  12 -24    8.90    4.50
  -2 -12 -24    5.80    4.40
  -2  12 -25   22.60    5.20
  -2 -12 -25   28.30    5.10
  -2  12 -26    6.20    4.70
  -2 -12 -26    6.50    3.70
  -2 -12 -27   16.40    4.10
  -2 -12 -28    5.90    4.20
   2 -14 -30   -0.90    3.10
   2 -14 -29   12.10    4.20
   2 -14 -28    0.30    4.60
   2  14 -27   20.40    4.60
  -2 -14  27   19.10    5.50
   2 -14 -27   24.00    6.40
   2  14 -26   -5.40    4.60
  -2 -14  26    2.30    4.40
   2 -14 -26   -1.60    3.40
   2  14 -25   44.90    5.40
   2 -14 -25   37.90    4.80
   2  14 -24   31.00    6.20
   2 -14 -24   12.60    3.50
   2  14 -23   18.90    4.70
   2 -14 -23   19.50    3.90
   2 -14 -23   19.00    3.30
   2  14 -22   13.40    7.00
   2 -14 -22   -3.10    2.70
   2 -14 -22   -1.50    2.80
   2  14 -21   58.40    5.30
  -2  14  21   53.50    4.50
   2 -14 -21   58.50    4.20
   2  14 -20   23.90    3.80
  -2  14  20   54.10   12.50
   2 -14 -20   23.30    2.90
   2  14 -19   31.70    3.70
  -2  14  19   36.10    3.60
   2 -14 -19   36.80    3.10
   2  14 -18   -2.10    3.10
  -2  14  18    2.30    2.70
  -2 -14  18    1.60    2.10
   2 -14 -18    1.00    2.50
   2  14 -17   97.00    5.30
  -2  14  17   92.20    4.90
  -2 -14  17   90.70    5.80
  -2 -14  17  102.80    4.90
   2 -14 -17   96.50    5.40
   2  14 -16   10.20    4.60
  -2  14  16    8.50    2.80
  -2 -14  16    7.40    3.90
  -2 -14  16    6.90    2.20
   2 -14 -16   13.00    3.50
   2  14 -15  109.60    5.80
  -2  14  15  108.20    5.20
  -2 -14  15  110.40    6.40
   2 -14 -15  108.70    5.60
   2  14 -14   -5.10    2.70
  -2  14  14    1.30    2.90
  -2 -14  14    3.50    3.10
   2 -14 -14    3.90    2.50
   2  14 -13   93.30    5.40
  -2  14  13   92.20    4.90
  -2 -14  13   96.40    5.10
   2 -14 -13   92.60    5.30
   2  14 -12    3.20    2.60
  -2  14  12    3.20    2.20
  -2 -14  12    0.10    2.30
   2 -14 -12    3.50    2.20
   2  14 -11   16.40    3.00
  -2  14  11   14.80    2.50
  -2 -14  11   15.30    2.80
   2 -14 -11   17.90    2.80
   2  14 -10    8.80    2.60
  -2  14  10    9.20    2.20
  -2 -14  10   13.30    3.20
   2 -14 -10   11.40    2.70
   2  14  -9  237.10    9.10
   2  14  -9  227.40    9.80
  -2  14   9  233.90    9.20
   2 -14  -9  228.50    9.20
   2  14  -8    2.40    2.60
   2  14  -8    4.30    2.50
  -2  14   8    4.40    2.00
   2 -14  -8    1.60    2.40
   2  14  -7   40.40    3.30
   2  14  -7   44.40    3.20
  -2  14   7   40.80    3.40
   2 -14  -7   40.40    3.10
   2  14  -6   10.40    2.40
   2  14  -6    5.50    2.50
  -2  14   6    9.00    2.30
  -2  14   6   27.30    6.00
   2  14  -5   72.00    4.30
   2  14  -5   84.00    4.10
  -2  14   5   80.20    4.40
  -2  14   5   90.10    7.90
   2  14  -4   41.50    3.80
   2  14  -4   45.40    4.10
  -2  14   4   40.60    3.40
  -2  14   4   39.70    3.20
   2  14  -3  253.10   10.20
   2  14  -3  252.30   10.30
  -2  14   3  255.50   10.20
  -2  14   3  254.30   11.20
   2  14  -2    9.10    2.60
   2  14  -2    7.90    3.40
  -2  14   2   13.70    2.90
  -2  14   2    6.20    2.30
   2  14  -1   96.10    4.80
   2  14  -1  103.00    5.60
  -2  14   1  101.10    4.90
  -2  14   1   99.40    5.10
   2  14   0   13.90    2.70
   2  14   0   16.10    3.20
  -2  14   0   16.70    2.60
  -2  14   0   15.10    2.60
   2  14   1   86.70    4.80
   2  14   1   87.70    4.40
  -2  14  -1   87.80    4.50
  -2  14  -1   94.50    5.00
   2  14   2   37.20    3.30
  -2  14  -2   43.30    3.40
  -2  14  -2   40.70    3.10
  -2 -14  -2   42.40    3.20
   2  14   3  169.00    7.10
  -2  14  -3  162.80    6.80
  -2  14  -3  180.40    8.90
  -2 -14  -3  159.50    7.50
   2  14   4   10.70    2.50
  -2  14  -4   11.80    2.40
  -2  14  -4   13.20    2.20
  -2 -14  -4   10.70    2.90
   2  14   5  140.40    6.20
  -2  14  -5  132.90    6.00
  -2 -14  -5  132.80    5.80
   2 -14   5  127.80    6.40
   2  14   6   -2.30    2.10
  -2  14  -6   -4.20    2.40
  -2 -14  -6   -4.10    2.70
   2 -14   6   -1.60    2.20
   2  14   7  112.70    5.20
  -2  14  -7  103.40    6.20
  -2 -14  -7  110.50    5.70
   2 -14   7  111.90    5.20
   2  14   8   11.40    3.10
  -2  14  -8   10.30    2.60
  -2 -14  -8   15.80    3.00
   2 -14   8    7.50    2.50
   2  14   9  218.60    9.60
  -2  14  -9  214.20    8.70
  -2 -14  -9  229.20   10.00
   2 -14   9  216.40    9.60
   2  14  10   38.90    3.60
  -2  14 -10   39.00    3.70
  -2 -14 -10   49.00    3.80
   2 -14  10   40.40    3.70
   2  14  11   70.20    4.00
  -2  14 -11   56.40    4.90
   2 -14  11   67.40    4.20
   2  14  12   33.00    9.70
  -2  14 -12   18.80    4.20
   2 -14  12   13.10    2.70
   2  14  13   96.00    5.40
  -2  14 -13   97.50    5.20
  -2 -14 -13   92.30    5.30
   2 -14  13   98.20    5.80
   2  14  14   14.00    2.90
  -2  14 -14   10.90    3.20
  -2 -14 -14   15.70    3.10
   2 -14  14   18.70    3.80
   2  14  15  139.20    6.80
  -2  14 -15  150.10    8.30
  -2 -14 -15  155.70    7.60
   2 -14  15  145.90    7.80
   2  14  16   29.50    3.50
  -2  14 -16   34.80    4.20
  -2 -14 -16   30.40    3.70
   2  14  17   20.40    3.40
  -2  14 -17   26.00    4.00
  -2 -14 -17   22.60    3.70
  -2  14 -18   -3.60    3.10
  -2 -14 -18   -1.00    3.00
  -2  14 -19   36.00    4.90
  -2 -14 -19   34.40    4.10
  -2  14 -20    2.00    3.80
  -2 -14 -20   -3.90    3.30
  -2  14 -21   59.40    6.60
  -2 -14 -21   60.80    5.80
  -2  14 -22   11.70    4.60
  -2 -14 -22   11.50    4.10
  -2  14 -23   41.30    5.50
  -2 -14 -23   46.50    5.50
  -2  14 -24   -4.90    4.20
  -2 -14 -24    0.40    3.80
  -2  14 -25   12.30    5.20
  -2 -14 -25   16.20    4.20
  -2 -14 -26   -1.00    3.90
  -2 -14 -27   35.20    8.00
   2 -16 -29    5.30    2.90
   2 -16 -28    6.50    4.80
   2 -16 -27    2.00    4.30
   2 -16 -26   20.50    4.00
   2  16 -25    5.20    4.00
   2 -16 -25   -1.20    5.10
   2  16 -24    3.70    4.70
   2 -16 -24   -1.00    3.30
   2  16 -23   13.80    4.30
   2 -16 -23   13.80    4.00
   2  16 -22   50.70    5.50
   2 -16 -22   40.60    4.20
   2  16 -21   25.10    4.30
   2 -16 -21   26.90    3.70
   2  16 -20    8.20    3.80
   2 -16 -20   12.40    3.10
   2  16 -19    2.60    3.50
   2 -16 -19   -1.10    2.60
   2  16 -18   41.10    4.20
  -2  16  18   29.20    3.20
  -2 -16  18   36.20    3.00
   2 -16 -18   35.70    3.50
   2  16 -17   25.30    3.90
  -2  16  17   29.00    3.50
  -2 -16  17   31.40    3.10
   2 -16 -17   45.40    4.30
   2  16 -16   75.80    5.60
  -2  16  16   68.90    4.70
   2 -16 -16   71.00    4.70
   2  16 -15   16.50    4.10
  -2  16  15   19.00    3.20
   2 -16 -15   17.10    2.80
   2  16 -14   35.20    3.50
  -2  16  14   37.80    3.90
  -2 -16  14   22.40    3.70
   2 -16 -14   33.10    3.40
   2  16 -13   39.40    4.90
  -2  16  13   38.00    3.90
  -2 -16  13   48.80    7.10
   2  16 -12   40.00    4.10
   2  16 -12   34.10    3.60
  -2  16  12   32.10    3.50
  -2 -16  12   34.10    3.70
   2  16 -11    4.80    3.60
   2  16 -11    2.00    2.50
  -2  16  11    8.70    2.50
   2 -16 -11    8.80    2.30
   2  16 -10  127.20    7.20
   2  16 -10  117.00    6.20
  -2  16  10  130.50    5.80
   2 -16 -10  126.70    5.70
   2  16  -9   91.70    5.50
   2  16  -9   88.90    5.10
  -2  16   9  106.70    5.20
   2 -16  -9  101.90    5.00
   2  16  -8   88.30    5.10
   2  16  -8   85.40    4.70
  -2  16   8   83.50    4.70
   2 -16  -8   87.30    4.70
   2  16  -7    3.40    2.90
   2  16  -7    4.30    2.50
  -2  16   7    2.30    2.40
  -2  16   7    4.00    3.50
   2  16  -6   75.10    4.50
   2  16  -6   69.30    4.10
  -2  16   6   71.60    4.60
  -2  16   6   72.90    3.90
   2  16  -5  140.90    6.50
   2  16  -5  134.40    6.30
  -2  16   5  141.70    7.40
  -2  16   5  147.60    6.60
   2  16  -4   39.10    3.60
   2  16  -4   33.20    3.40
  -2  16   4   38.90    3.20
  -2  16   4   40.10    3.10
   2  16  -3    6.50    3.50
   2  16  -3    5.40    2.60
  -2  16   3    3.60    2.50
  -2  16   3    2.80    2.50
   2  16  -2  111.40    5.60
   2  16  -2  113.80    6.20
  -2  16   2  108.70    5.90
  -2  16   2  112.30    5.60
   2  16  -1   81.60    4.80
   2  16  -1   80.40    5.10
  -2  16   1   92.70    5.20
  -2  16   1   88.10    5.00
   2  16   0   24.50    3.00
   2  16   0   25.40    2.90
  -2  16   0   24.30    3.00
  -2  16   0   26.30    3.50
   2  16   1   28.90    3.30
   2  16   1   30.90    3.20
  -2  16  -1   30.80    2.90
  -2  16  -1   33.90    3.60
   2  16   2   68.70    4.70
   2  16   2   69.60    4.90
  -2  16  -2   70.80    4.30
  -2  16  -2   63.80    4.00
   2  16   3  147.00    7.30
   2  16   3  143.80    7.10
  -2  16  -3  138.20    6.90
  -2  16  -3  135.10    6.40
   2  16   4  117.10    6.60
  -2  16  -4  110.50    5.40
  -2  16  -4  115.20    5.50
  -2 -16  -4  112.50    5.70
   2  16   5   -1.50    2.60
  -2  16  -5   -3.10    2.70
  -2  16  -5   -0.70    2.30
  -2 -16  -5    0.80    3.10
   2  16   6    6.70    3.00
  -2  16  -6    3.80    2.60
  -2  16  -6    3.60    2.40
  -2 -16  -6    4.50    2.70
   2  16   7   71.60    4.80
  -2  16  -7   65.40    4.30
  -2  16  -7   67.30    4.30
  -2 -16  -7   73.40    4.50
   2  16   8   99.20    5.10
  -2  16  -8  100.50    5.20
  -2 -16  -8   93.20    5.20
   2 -16   8   93.40    5.20
   2  16   9   39.40    3.70
  -2  16  -9   36.40    3.90
   2 -16   9   42.40    3.50
   2  16  10   67.90    5.20
  -2  16 -10   55.20    4.60
   2 -16  10   60.80    5.20
   2  16  11   21.90    2.90
  -2  16 -11   18.60    3.40
  -2 -16 -11   21.70    3.50
   2 -16  11   21.30    3.40
   2  16  12   17.10    3.00
  -2  16 -12   16.50    3.30
  -2 -16 -12   20.70    3.30
   2 -16  12   13.30    3.70
   2  16  13   31.00    4.00
  -2  16 -13   34.40    4.30
  -2 -16 -13   34.10    3.70
   2  16  14   44.20    4.50
  -2  16 -14   53.00    4.60
  -2 -16 -14   58.00    3.90
   2 -16  14   55.10    2.70
  -2  16 -15   54.80    5.00
  -2 -16 -15   50.70    4.80
  -2  16 -16   44.20    4.60
  -2 -16 -16   38.00    3.90
  -2  16 -17   16.40    3.70
  -2 -16 -17   21.30    3.60
  -2  16 -18   19.20    5.50
  -2 -16 -18   20.20    4.30
  -2  16 -19   19.30    4.20
  -2 -16 -19   19.90    3.60
  -2  16 -20   48.10    5.60
  -2 -16 -20   42.20    4.70
  -2  16 -21    9.20    5.60
  -2 -16 -21    3.20    3.20
  -2  16 -22   29.90    4.80
  -2 -16 -22   32.40    4.70
  -2  16 -23   19.00    7.40
  -2 -16 -23   19.70    4.10
  -2 -16 -24    2.40    3.30
  -2 -16 -25    4.70    4.40
   2 -18 -27    1.10    2.40
   2 -18 -26   15.10    5.30
   2 -18 -25    2.40    3.70
   2 -18 -24    4.40    6.00
   2  18 -23   -5.00    4.00
   2 -18 -23   15.70    5.50
   2  18 -22   46.30    5.80
   2 -18 -22   47.70    4.50
   2  18 -21   -1.80    3.40
   2 -18 -21   -3.00    3.30
   2  18 -20    8.30    3.70
   2 -18 -20    7.80    4.30
   2  18 -19    4.00    3.70
   2 -18 -19   -0.90    3.30
   2  18 -18   68.50    5.40
   2 -18 -18   61.20    4.70
   2  18 -17    8.40    4.10
   2 -18 -17   -0.90    3.10
   2  18 -16   17.10    3.70
   2 -18 -16   19.80    3.20
   2  18 -15   -0.20    3.40
  -2  18  15   -2.20    2.60
   2 -18 -15    1.60    3.40
   2  18 -14  138.40    6.70
  -2  18  14  132.30    6.60
   2 -18 -14  144.60    7.20
   2  18 -13    3.00    3.30
  -2  18  13    2.70    3.40
   2 -18 -13    6.50    4.00
   2  18 -12   37.70    3.60
  -2  18  12   39.10    4.50
   2 -18 -12   41.80    3.80
   2  18 -11   -0.90    4.40
  -2  18  11   -2.10    2.60
   2 -18 -11    2.70    2.90
   2  18 -10  148.40    7.80
  -2  18  10  129.50    6.40
   2 -18 -10  139.40    6.90
   2  18  -9    2.60    3.20
   2  18  -9   -4.90    3.20
  -2  18   9   -1.40    2.90
  -2  18   9    0.90    2.60
   2  18  -8   69.50    4.70
   2  18  -8   51.70    4.30
  -2  18   8   63.80    4.50
  -2  18   8   79.80    4.80
   2  18  -7   -3.00    3.20
   2  18  -7    5.80    5.80
  -2  18   7    3.10    6.50
  -2  18   7    4.40    3.10
   2  18  -6   68.30    4.40
   2  18  -6   67.00    4.90
  -2  18   6   68.40    4.50
  -2  18   6   67.40    4.30
   2  18  -5   -0.50    2.90
   2  18  -5    4.20    3.60
  -2  18   5   -0.80    2.50
  -2  18   5    3.40    2.70
   2  18  -4  117.30    6.00
   2  18  -4  102.60    5.70
  -2  18   4  111.70    6.20
  -2  18   4  112.50    5.80
   2  18  -3   21.20    4.00
   2  18  -3    7.40    2.80
  -2  18   3   12.20    2.80
  -2  18   3   15.30    3.40
   2  18  -2  104.10    6.10
   2  18  -2  103.10    5.70
  -2  18   2   91.50    5.80
  -2  18   2   96.50    5.50
   2  18  -1   19.90    3.40
   2  18  -1   15.70    2.90
  -2  18   1   25.70    4.20
  -2  18   1   19.30    2.90
   2  18   0  107.40    6.30
   2  18   0  109.60    5.80
  -2  18   0  114.50    5.70
  -2  18   0  115.40    6.20
   2  18   1    1.90    3.00
   2  18   1    2.90    2.50
  -2  18  -1    2.80    2.90
  -2  18  -1    3.00    3.40
   2  18   2   62.30    4.70
   2  18   2   51.10    4.10
  -2  18  -2   54.00    4.10
  -2  18  -2   59.30    5.20
   2  18   3    5.50    3.20
   2  18   3    6.50    2.80
  -2  18  -3    1.20    2.50
  -2  18  -3    1.10    2.40
   2  18   4   40.80    3.60
   2  18   4   35.20    3.50
  -2  18  -4   40.40    3.70
  -2  18  -4   32.70    3.20
   2  18   5    9.80    3.20
   2  18   5    5.80    2.80
  -2  18  -5    8.90    2.90
  -2  18  -5    7.70    2.50
   2  18   6   54.90    4.50
  -2  18  -6   64.10    4.30
  -2  18  -6   52.50    4.30
  -2 -18  -6   59.90    4.00
   2  18   7   10.50    3.80
  -2  18  -7   -1.70    2.80
  -2  18  -7    2.60    5.10
  -2 -18  -7   -2.20    2.80
   2  18   8   64.00    5.10
  -2  18  -8   68.10    4.60
  -2  18  -8   45.50    3.90
  -2 -18  -8   66.00    4.50
   2  18   9   -5.80    3.90
  -2  18  -9   -1.30    3.00
  -2  18 -10   73.00    5.50
  -2  18 -11    1.70    3.40
  -2 -18 -11   -1.80    4.10
  -2  18 -12   30.90    4.10
  -2 -18 -12   30.30    3.80
  -2  18 -13   -1.70    3.40
  -2 -18 -13   -0.60    3.20
  -2  18 -14   37.20    4.50
  -2 -18 -14   36.10    4.50
  -2  18 -15    5.20    3.80
  -2 -18 -15    0.00    3.30
  -2  18 -16   67.40    5.70
  -2 -18 -16   70.00    5.30
  -2  18 -17   -3.70    6.60
  -2 -18 -17    6.20    5.70
  -2  18 -18    9.60    4.40
  -2 -18 -18   12.90    4.00
  -2  18 -19    2.80    4.70
  -2 -18 -19    0.00    3.60
  -2  18 -20   27.40    5.00
  -2 -18 -20   30.20    4.50
  -2  18 -21    2.20    4.30
  -2 -18 -21   -0.60    3.40
  -2 -18 -22   21.40    4.40
  -2 -18 -23   -2.90    3.50
   2 -20 -24    6.10    2.70
   2 -20 -23   10.40    5.60
   2 -20 -22    9.30    6.00
   2 -20 -21    1.80    3.30
   2  20 -20   20.10    4.90
   2 -20 -20   26.80    5.50
   2  20 -19    6.00    3.80
   2 -20 -19    7.30    4.10
   2  20 -18   32.60    5.00
   2 -20 -18   28.30    3.70
   2  20 -17   10.80    3.90
   2 -20 -17   14.30    3.50
   2  20 -16   24.30    4.30
   2 -20 -16   22.80    3.60
   2  20 -15    0.50    4.30
   2 -20 -15    3.40    3.80
   2  20 -14    4.80    4.20
   2 -20 -14    5.30    3.20
   2  20 -13   47.10    4.80
   2 -20 -13   54.00    4.30
   2  20 -12   31.80    4.60
  -2  20  12   37.70    4.40
   2  20 -11   -0.50    3.30
   2  20 -10   35.10    4.10
   2  20  -9   35.60    5.10
  -2  20   9   34.30    4.20
   2  20  -8    1.80    3.70
  -2  20   8    0.80    3.30
   2  20  -7    4.30    4.00
  -2  20   7   -4.60    2.90
   2  20  -6   47.40    4.30
  -2  20   6   40.90    4.30
   2  20  -5   68.50    5.30
  -2  20   5   46.00    4.10
   2  20  -4   23.90    3.70
  -2  20   4   21.20    3.60
  -2  20   4   17.70    3.20
   2  20  -3   20.80    5.10
  -2  20   3   10.00    3.10
  -2  20   3    2.00    2.90
   2  20  -2   42.80    4.60
  -2  20   2   43.20    4.90
  -2  20   2   33.40    3.50
   2  20  -1   67.70    5.20
  -2  20   1   69.10    4.70
  -2  20   1   58.30    4.30
   2  20   0   45.40   14.20
  -2  20   0   16.70    3.50
  -2  20   0   10.30    3.00
   2  20   1   54.50   14.20
  -2  20  -1   10.20    3.50
   2  20   2   60.80    4.90
  -2  20  -2   60.20    5.20
   2  20   3   64.90    4.80
  -2  20  -3   56.40    4.90
  -2  20  -4   88.10    5.70
  -2  20  -5   12.10    3.40
  -2  20  -6    0.30    3.80
   2  20   7   41.60    4.70
  -2  20  -7   36.50    5.40
  -2  20  -8   22.70    5.60
  -2 -20  -8   26.00    3.40
  -2  20  -9    5.70    3.40
  -2 -20  -9   11.30    3.60
  -2  20 -10   35.90    4.20
  -2 -20 -10   31.30    3.60
  -2  20 -11   64.80    4.90
  -2 -20 -11   68.60    4.90
  -2  20 -12   20.70    4.10
  -2 -20 -12   22.90    4.90
  -2 -20 -13   -0.70    3.30
  -2  20 -14   19.00    5.50
  -2 -20 -14   15.50    4.40
  -2  20 -15   25.80    4.30
  -2 -20 -15   24.50    4.60
  -2  20 -16   13.60    4.80
  -2 -20 -16   19.80    4.10
  -2  20 -17    4.10    4.60
  -2 -20 -17    3.70    3.60
  -2  20 -18   11.90    4.00
  -2 -20 -18   11.90    4.60
  -2 -20 -19   23.00    6.30
  -2 -20 -20    4.40    5.00
   2 -22 -21    2.80    3.00
   2 -22 -20    6.50    3.50
   2 -22 -19    8.40    3.80
   2 -22 -18   -8.10    3.20
   2 -22 -17   10.00    3.70
   2  22 -16    7.50    4.70
   2 -22 -16   -0.70    3.60
   2  22 -15   35.90    4.60
  -2  22  15   35.90    5.10
   2  22 -14    2.50    3.90
  -2  22  14   -4.30    5.00
   2  22 -13   22.40    4.30
  -2  22  13   24.50    4.30
   2  22 -12    1.80    3.60
  -2  22  12    0.50    3.40
   2  22 -11   32.40    4.60
  -2  22  11   34.50    5.30
   2  22 -10   10.10    4.10
  -2  22  10    7.40    3.70
   2  22  -9   26.70    4.20
  -2  22   9   35.50    4.50
   2  22  -8   -0.80    3.40
  -2  22   8    4.50    3.20
   2  22  -7   52.90    5.00
  -2  22   7   48.00    4.90
   2  22  -6    6.00    3.90
   2  22  -5   35.10    4.40
   2  22  -4   10.10    3.60
  -2  22   4   -2.70    3.20
   2  22  -3   25.20    4.00
  -2  22   3   28.00    4.30
   2  22  -2    1.00    3.60
  -2  22   2    5.20    4.90
   2  22  -1   58.70    5.00
  -2  22   1   70.10    7.60
   2  22   0    4.00    3.50
  -2  22   0    6.40    4.80
   2  22   1   29.10    4.30
  -2  22  -4    0.80    3.50
  -2  22  -5   39.40    4.50
  -2  22  -6   17.10    4.20
  -2  22  -7   16.80    4.00
   2  22   8    8.30    4.00
  -2  22  -8    3.90    3.70
   2  22   9   38.90    4.40
  -2  22  -9   40.30    4.80
   2  22  10   18.40    4.90
  -2  22 -10    7.20    4.60
  -2  22 -11   22.80    5.10
  -2 -22 -11   24.40    4.30
  -2 -22 -12    2.10    3.50
  -2  22 -13   34.70    5.50
  -2 -22 -13   38.80    4.60
  -2  22 -14   -0.80    4.00
  -2 -22 -14   -6.70    3.50
  -2 -22 -15   17.30    4.00
  -2 -22 -16    0.20    3.80
  -2 -22 -17   17.10    4.20
  -2  24  15   14.30    5.00
  -2  24  14    9.00    5.00
  -2  24  13   -0.80    3.80
  -2  24  12   -1.80    4.00
  -2  24  11   15.40    4.80
   2  24 -10   -4.10    3.70
  -2  24  10    1.40    4.00
   2  24  -9   12.90    4.60
  -2  24   9   10.80    5.10
   2  24  -8    1.10    3.80
  -2  24   8   -7.30    4.90
   2  24  -7   27.40    4.60
  -2  24   7   30.70    4.70
   2  24  -6   -1.90    3.90
   2  24  -5   -2.00    3.20
  -2  24   4    8.50    4.00
   2  24  -3   61.30    6.80
   2  24  -2   19.20    5.40
  -2  24   1    9.10    5.70
   2  24   1   27.10    4.90
  -2  24  -3   -2.00    3.40
  -2  24  -4   15.10    4.40
   2  24   6    8.60    4.90
   2  24   7   -2.20    3.90
  -2  24  -7    2.30    4.10
   2  24   8   11.50    4.50
  -2  24  -8   13.80    4.40
   2  24   9   26.70    5.20
  -2  24  -9   25.20    4.50
   2  24  10   16.90    5.10
  -2  26   5   -1.60    3.50
  -2  26   4   17.70    4.20
  -2  26   3    9.00    6.20
  -2  26   2   11.30    4.60
  -2  26   1    0.80    4.30
   3   1 -35    2.40    4.20
   3  -1 -35   -0.40    3.40
   3   1 -34    6.30    4.00
   3  -1 -34   11.90    4.10
   3   1 -33    3.00    4.50
   3  -1 -33    2.60    3.90
   3   1 -32   47.00    8.90
   3  -1 -32   36.70    5.70
   3   1 -31   13.70    3.90
   3  -1 -31   19.70    3.70
   3   1 -30   25.80    3.70
   3  -1 -30   21.00    3.40
   3   1 -29   20.20    3.60
   3   1 -29   55.50   13.30
   3  -1 -29   16.00    3.60
   3  -1 -29   20.40    3.80
   3   1 -28   73.10    7.40
   3   1 -28   71.30    6.20
  -3   1  28   53.30    4.80
   3  -1 -28   67.80    4.70
   3  -1 -28   78.70    7.80
   3   1 -27   13.90    3.70
   3   1 -27    5.30    3.30
  -3   1  27    0.40    2.60
  -3  -1  27    0.80    3.10
   3  -1 -27    1.90    2.90
   3  -1 -27   -0.30    4.00
   3   1 -26   57.90    4.40
   3   1 -26   59.10    5.50
  -3   1  26   55.20    3.90
  -3  -1  26   49.80    4.60
   3  -1 -26   58.10    4.30
   3  -1 -26   59.40    5.10
   3   1 -25    4.90    2.80
   3   1 -25    5.10    3.50
  -3   1  25    3.00    2.90
  -3  -1  25    8.60    3.80
   3  -1 -25    6.60    2.60
   3  -1 -25    8.00    4.10
   3   1 -24   91.20    5.20
   3   1 -24   90.10    6.40
  -3   1  24   96.30    5.00
  -3  -1  24   89.50    5.00
   3  -1 -24   95.90    5.30
   3  -1 -24   98.40    7.40
   3   1 -23   26.20    3.30
   3   1 -23   24.40    3.80
  -3   1  23   23.40    3.60
  -3  -1  23   22.10    3.00
   3  -1 -23   25.30    3.10
   3  -1 -23   21.60    4.40
   3   1 -22   36.50    3.20
   3   1 -22   63.00    8.50
  -3   1  22   36.10    3.20
  -3  -1  22   38.60    3.80
  -3  -1  22   36.00    3.60
   3  -1 -22   38.70    3.60
   3  -1 -22   35.40    3.90
   3   1 -21    2.30    2.70
   3   1 -21   -0.30    3.00
  -3   1  21    0.80    2.60
  -3  -1  21   -3.60    2.20
  -3  -1  21   -1.10    2.60
   3  -1 -21    4.40    4.00
   3  -1 -21    0.50    2.60
   3   1 -20  188.50    7.90
   3   1 -20  176.40    8.30
  -3   1  20  198.70    7.80
  -3  -1  20  192.40    7.90
  -3  -1  20  198.70    7.90
   3  -1 -20  185.40    8.00
   3   1 -19   19.60    2.80
  -3   1  19   18.40    2.20
  -3  -1  19   16.40    2.40
  -3  -1  19   16.00    2.70
   3  -1 -19   16.60    2.70
   3   1 -18   67.40    3.70
  -3   1  18   66.20    3.60
  -3  -1  18   60.90    3.50
  -3  -1  18   69.70    4.00
   3   1 -17   28.80    2.80
  -3   1  17   28.50    2.40
  -3  -1  17   30.90    2.60
  -3  -1  17   25.70    2.70
   3   1 -16  236.50   10.00
  -3   1  16  248.00   10.00
  -3  -1  16  243.30    9.40
  -3  -1  16  248.10   10.80
   3  -1 -16  242.60    9.70
   3  -1 -16  225.40   12.50
   3   1 -15   55.60    3.40
  -3   1  15   57.00    3.20
  -3   1  15   54.10    3.70
  -3  -1  15   58.30    3.70
  -3  -1  15   55.80    3.70
   3  -1 -15   48.70    3.50
   3   1 -14  171.70    8.60
   3   1 -14  164.90    7.70
  -3   1  14  177.10    7.40
  -3   1  14  159.10    7.50
  -3  -1  14  170.70    7.10
  -3  -1  14  165.20    7.60
   3  -1 -14  176.50    8.30
   3   1 -13   11.00    1.60
   3   1 -13   10.50    2.30
  -3   1  13   10.10    1.50
  -3   1  13   11.80    2.20
  -3  -1  13   13.10    1.80
  -3  -1  13   11.90    1.80
   3  -1 -13   12.40    1.80
   3   1 -12  217.50    8.50
   3   1 -12  218.90    9.30
  -3   1  12  216.20    8.50
  -3   1  12  203.30    8.80
  -3  -1  12  213.70    8.70
   3  -1 -12  222.30    9.30
   3   1 -11    5.60    1.50
   3   1 -11    8.40    1.70
  -3   1  11    5.00    1.70
  -3   1  11    4.50    1.40
  -3  -1  11    4.90    1.20
  -3  -1  11    5.30    1.60
   3  -1 -11    5.40    1.70
   3   1 -10   87.60    5.30
   3   1 -10   88.30    4.40
  -3   1  10   84.70    4.10
  -3  -1  10   87.30    3.80
   3  -1 -10   88.90    4.70
   3   1  -9   25.50    2.00
   3   1  -9   27.80    2.10
  -3   1   9   28.30    1.80
  -3  -1   9   27.60    1.80
   3  -1  -9   28.00    2.40
   3   1  -8  269.30   10.50
   3   1  -8  287.00   11.70
  -3   1   8  267.60   11.10
  -3  -1   8  276.90   10.50
  -3  -1   8  274.30   12.30
   3  -1  -8  276.70   11.40
   3   1  -7   15.60    1.30
   3   1  -7   19.20    1.50
  -3  -1   7   18.60    1.20
  -3  -1   7   17.90    1.50
   3  -1  -7   16.80    1.40
   3  -1  -7   18.00    1.80
   3   1  -6  199.30    7.80
   3   1  -6  215.50    8.30
  -3  -1   6  196.70    7.70
  -3  -1   6  197.50    7.90
   3  -1  -6  195.40    8.10
   3  -1  -6  213.30    9.30
   3   1  -5   15.80    1.00
  -3   1   5   13.60    1.60
  -3  -1   5   12.80    1.90
  -3  -1   5   15.60    1.60
   3  -1  -5   16.30    0.90
   3  -1  -5   25.90    2.30
   3  -1  -5   23.70    2.30
   3   1  -4   24.40    1.40
  -3   1   4   27.90    2.90
  -3  -1   4   33.40    1.80
   3  -1  -4   26.20    1.10
   3   1  -3  388.60   13.30
   3   1  -3  393.00   13.50
  -3   1   3  390.40   14.00
  -3   1   2   18.70    2.10
  -3   1   1   60.60    2.90
  -3  -1   1   54.80    2.30
  -3  -1   0  365.00   12.50
  -3  -1  -1   15.80    1.70
   3   1   2    6.60    0.90
  -3  -1  -2    8.00    1.00
   3  -1   2    8.60    1.00
   3   1   3   61.60    2.70
  -3  -1  -3   60.00    3.10
  -3  -1  -3   63.70    2.80
   3  -1   3   62.30    3.20
   3   1   4    6.60    1.10
  -3  -1  -4    5.60    1.20
   3  -1   4    6.50    1.00
   3   1   5  361.20   14.10
  -3  -1  -5  357.30   13.60
  -3  -1  -5  378.10   11.60
   3  -1   5  357.00   13.10
   3   1   6   15.20    1.70
   3  -1   6   13.50    1.30
   3   1   7   -1.70    1.30
   3  -1   7   -2.60    1.30
   3   1   8  209.20    9.00
   3  -1   8  215.70    8.40
   3   1   9   20.90    1.80
   3  -1   9   17.60    1.90
   3  -1   9   19.00    1.20
   3   1  10   40.30    2.60
   3  -1  10   40.90    2.80
   3  -1  10   39.90    1.90
   3   1  11   85.60    4.50
   3  -1  11   91.10    4.30
   3  -1  11   83.90    3.30
   3   1  12  260.00    9.60
  -3   1 -12  259.20   10.70
  -3  -1 -12  254.30   10.50
   3  -1  12  272.60    9.80
   3  -1  12  255.10    8.90
   3   1  13    6.30    1.90
  -3   1 -13    6.50    2.20
  -3  -1 -13    7.90    2.10
   3  -1  13   10.60    2.00
   3   1  14   72.10    3.60
  -3   1 -14   75.60    4.40
  -3  -1 -14   69.40    4.10
   3  -1  14   75.00    4.00
   3   1  15    7.10    2.10
  -3   1 -15    8.90    2.20
  -3  -1 -15    8.70    2.20
   3  -1  15    8.50    2.50
   3   1  16  213.80    8.80
  -3   1 -16  219.20    9.80
  -3  -1 -16  211.90    9.30
   3  -1  16  214.00    9.00
   3   1  17   29.60    2.90
  -3   1 -17   32.60    3.00
  -3  -1 -17   28.00    3.00
   3  -1  17   27.30    3.90
   3   1  18   19.50    2.80
  -3   1 -18   18.70    2.90
  -3  -1 -18   16.20    2.80
   3  -1  18   17.80    2.80
   3   1  19    0.20    2.30
  -3   1 -19   -1.00    3.20
  -3  -1 -19    2.10    2.70
   3  -1  19    1.00    2.50
   3   1  20  120.30    6.30
  -3   1 -20  124.00    8.50
  -3  -1 -20  119.10    5.90
   3  -1  20  116.80    5.90
   3   1  21   46.40    3.80
  -3   1 -21   51.40    4.10
  -3  -1 -21   51.00    4.10
   3  -1  21   44.60    4.10
   3   1  22   89.20    5.40
  -3   1 -22   90.40    6.00
  -3  -1 -22   86.80    6.10
   3  -1  22   88.20    5.30
  -3   1 -23   26.40    4.10
  -3  -1 -23   19.70    4.80
  -3   1 -24   21.60    3.50
  -3   1 -24   26.70    3.30
  -3  -1 -24   27.80    3.80
  -3   1 -25   22.40    3.80
  -3   1 -25   33.00    7.40
  -3  -1 -25   27.60    4.20
  -3   1 -26   59.40    4.80
  -3  -1 -26   61.90    5.00
  -3   1 -27    3.60    3.40
  -3  -1 -27    0.10    3.60
  -3   1 -28   50.40    4.70
  -3  -1 -28   76.00   13.20
  -3   1 -29    4.70    3.70
  -3  -1 -29   15.30    6.00
  -3   1 -30   31.90    4.80
  -3  -1 -30   24.30    4.60
   3  -3 -35   -0.70    3.20
   3   3 -34   77.20   13.00
   3  -3 -34   12.60    4.00
   3   3 -33   48.10    5.70
   3  -3 -33   35.40    4.80
   3   3 -32    9.00    4.70
   3  -3 -32   11.90    4.40
   3   3 -31   19.40    3.60
   3  -3 -31   16.90    3.40
   3   3 -30   15.90    4.30
   3  -3 -30    7.80    3.40
   3  -3 -30   16.90    4.60
   3   3 -29   50.10    4.80
   3  -3 -29   51.70    4.80
   3  -3 -29   64.20   11.70
   3   3 -28   17.20    4.90
  -3   3  28    8.80    3.00
   3  -3 -28   13.10    3.10
   3  -3 -28   14.30    4.70
   3   3 -27   20.00    3.70
  -3   3  27   62.90   12.10
  -3  -3  27   13.30    4.10
  -3  -3  27   19.90    3.90
   3  -3 -27   16.30    3.20
   3  -3 -27   21.30    4.90
   3   3 -26   34.50    3.40
  -3   3  26   29.90    4.20
  -3  -3  26   32.50    4.10
  -3  -3  26   32.50    3.70
   3  -3 -26   28.80    3.30
   3   3 -25   81.50    4.90
  -3   3  25   79.10    4.80
  -3  -3  25   84.40    5.20
  -3  -3  25   85.60    5.30
   3  -3 -25   77.40    5.10
   3   3 -24   -1.10    3.00
  -3   3  24   -1.10    2.50
  -3  -3  24   -1.30    2.80
  -3  -3  24    0.70    3.20
   3  -3 -24    0.60    3.70
   3   3 -23   76.50    4.70
  -3   3  23   68.70    4.10
  -3  -3  23   75.30    4.40
  -3  -3  23   67.90    4.90
   3  -3 -23   68.90    4.40
   3   3 -22   33.00    3.30
  -3   3  22   29.50    3.30
  -3  -3  22   35.80    4.00
  -3  -3  22   35.70    3.50
   3  -3 -22   28.70    3.70
   3   3 -21   54.30    4.20
  -3   3  21   56.10    3.70
  -3  -3  21   48.10    3.40
  -3  -3  21   49.30    4.30
   3  -3 -21   60.50    6.50
   3  -3 -21   49.20    4.40
   3   3 -20   12.20    2.40
  -3   3  20   10.80    2.60
  -3  -3  20   12.30    2.40
  -3  -3  20   16.00    3.10
   3  -3 -20   11.60    2.10
   3  -3 -20   14.10    2.60
  -3   3  19  111.20    5.10
  -3  -3  19  117.30    9.50
  -3  -3  19  121.00    6.60
   3  -3 -19  114.10    5.40
   3  -3 -19  106.00    6.00
  -3   3  18   14.80    2.40
  -3  -3  18   14.50    2.20
  -3  -3  18   17.00    3.60
   3  -3 -18   16.60    2.50
   3  -3 -18   13.80    2.50
   3   3 -17  128.20    5.80
  -3   3  17  130.30    5.90
  -3  -3  17  139.10    5.90
  -3  -3  17  129.80    6.30
   3  -3 -17  129.30    6.10
   3  -3 -17  134.60    6.70
   3   3 -16    1.60    2.10
  -3   3  16    4.00    1.70
  -3  -3  16    6.00    2.20
  -3  -3  16    5.40    1.90
   3  -3 -16    2.90    1.60
   3  -3 -16    4.80    2.00
   3   3 -15  180.40    7.70
  -3   3  15  184.90    7.50
  -3  -3  15  192.70    7.80
  -3  -3  15  189.80    7.90
   3  -3 -15  186.40    7.50
   3  -3 -15  181.10    9.10
   3   3 -14   28.00    2.50
  -3   3  14   30.40    2.10
  -3  -3  14   29.00    2.20
  -3  -3  14   29.70    3.00
   3  -3 -14   34.80    3.40
   3   3 -13   92.90    4.40
  -3   3  13   98.40    4.20
  -3  -3  13  100.30    4.40
  -3  -3  13   94.50    5.60
   3  -3 -13   93.00    5.30
   3   3 -12    8.60    1.40
  -3   3  12   10.60    1.30
  -3  -3  12   18.00    5.70
  -3  -3  12   10.90    2.20
   3  -3 -12   10.40    1.30
   3  -3 -12   12.70    2.10
   3   3 -11  185.00    7.20
  -3   3  11  191.40    7.30
  -3  -3  11  191.80    7.60
  -3  -3  11  211.20   10.40
   3  -3 -11  180.70    7.10
   3  -3 -11  192.80    9.00
   3   3 -10   66.70    3.30
  -3   3  10   69.20    3.10
  -3  -3  10   70.30    3.60
  -3  -3  10   75.10    4.20
  -3  -3  10   66.30    3.60
   3  -3 -10   66.80    2.90
   3  -3 -10   71.80    4.20
   3   3  -9  182.00    7.30
  -3   3   9  178.40    6.70
  -3  -3   9  190.60    7.70
  -3  -3   9  181.90    7.60
   3  -3  -9  176.60    6.80
   3  -3  -9  190.10    8.50
   3   3  -8   -0.30    1.30
  -3   3   8    1.40    0.90
  -3  -3   8    0.80    0.90
  -3  -3   8    1.60    1.20
   3  -3  -8    0.60    0.70
   3  -3  -8    0.90    1.50
   3   3  -7  345.70   12.80
  -3   3   7  341.60   12.20
  -3  -3   7  356.10   12.60
   3  -3  -7  336.80   12.30
   3   3  -6   66.00    3.00
  -3   3   6   68.20    2.80
  -3  -3   6   69.20    3.40
   3  -3  -6   62.80    2.80
   3   3  -5  293.20   10.20
  -3   3   5  282.50   10.30
  -3  -3   5  294.80   10.50
   3  -3  -5  275.70    9.90
   3   3  -4 1185.90   40.10
  -3  -3   4 1206.60   39.80
   3  -3  -4 1200.30   39.10
   3   3  -3  261.40    9.50
   3   3  -3  257.60    9.60
  -3   3   3  243.50    9.10
  -3   3   3  287.20    9.20
   3   3  -2   91.10    3.80
  -3   3   2   98.80    3.90
  -3  -3   2   91.40    3.90
   3  -3  -2   90.80    3.50
   3   3  -1 1056.90   36.10
  -3   3   1 1077.00   35.60
  -3  -3   1 1091.80   35.60
   3  -3  -1 1078.80   35.80
   3   3   0  154.90    5.90
  -3   3   0  160.20    5.90
  -3  -3   0  156.50    5.90
   3  -3   0  149.90    5.90
   3   3   1    9.40    1.00
  -3   3  -1    9.50    1.00
  -3  -3  -1    7.60    1.30
   3  -3   1   10.80    1.00
   3  -3   1    8.00    1.00
   3   3   2  142.10    5.80
  -3   3  -2  137.50    6.10
  -3  -3  -2  148.00    6.00
   3  -3   2  145.80    5.90
   3  -3   2  142.90    5.60
   3   3   3  303.60   11.20
  -3   3  -3  289.00   10.80
  -3  -3  -3  296.10   10.70
   3  -3   3  301.80   10.80
   3   3   4    9.10    1.40
  -3   3  -4    6.00    1.10
  -3  -3  -4    7.70    1.20
   3  -3   4    4.90    1.30
   3   3   5  390.50   14.60
  -3   3  -5  376.90   13.90
  -3  -3  -5  396.00   14.60
   3  -3   5  381.70   14.00
   3   3   6   10.30    1.50
  -3   3  -6   12.60    1.50
  -3  -3  -6    9.70    1.20
   3  -3   6    9.90    1.40
   3   3   7  114.10    4.30
  -3   3  -7  114.70    5.00
  -3  -3  -7  111.60    4.60
   3  -3   7  109.10    5.00
   3   3   8    3.20    1.40
  -3   3  -8    3.30    1.80
   3  -3   8   -0.10    1.40
   3   3   9   95.20    4.30
  -3   3  -9   98.40    4.50
   3  -3   9   95.90    4.80
   3   3  10   99.00    4.90
  -3   3 -10  101.30    5.30
  -3  -3 -10  104.50    4.50
  -3  -3 -10  112.90    4.20
   3  -3  10   99.40    4.70
   3   3  11   24.10    2.20
  -3  -3 -11   24.60    2.20
  -3  -3 -11   29.40    1.50
   3  -3  11   22.50    2.30
   3   3  12   -0.10    1.80
  -3  -3 -12    2.60    2.20
   3  -3  12   -1.30    1.80
   3   3  13  212.70    8.40
  -3   3 -13  198.50    8.50
  -3  -3 -13  199.10    8.30
   3  -3  13  201.30    8.90
   3   3  14   53.90    3.50
  -3   3 -14   50.90    3.50
  -3  -3 -14   45.70    3.20
   3  -3  14   46.40    3.70
   3  -3  14   50.00    2.90
   3   3  15   39.50    3.50
  -3   3 -15   27.00    2.80
  -3  -3 -15   38.20    3.00
   3  -3  15   32.00    3.30
   3  -3  15   37.20    2.30
   3   3  16    4.60    2.70
  -3   3 -16    1.50    2.50
  -3   3 -16    2.70    1.50
  -3  -3 -16    4.30    2.20
   3  -3  16   -0.50    2.20
   3  -3  16    2.00    1.40
   3   3  17  132.90    6.30
  -3   3 -17  129.40    6.20
  -3   3 -17  126.80    6.30
  -3  -3 -17  122.40    6.00
   3  -3  17  139.10    6.10
   3  -3  17  141.10    6.10
   3   3  18   23.90    3.30
  -3   3 -18   22.90    3.00
  -3   3 -18   26.90    2.10
  -3  -3 -18   38.70    5.90
   3  -3  18   24.10    4.30
   3  -3  18   27.00    1.90
   3   3  19   13.30    3.00
  -3   3 -19   10.70    3.20
  -3   3 -19   13.20    1.80
  -3  -3 -19   15.10    3.00
   3  -3  19   11.10    2.80
   3  -3  19   16.50    1.50
   3   3  20   78.90    5.10
  -3   3 -20   72.70    4.60
  -3   3 -20   76.50    3.80
  -3  -3 -20   77.60    5.40
   3  -3  20   71.50    4.50
   3   3  21  119.20    6.10
  -3   3 -21  121.20    6.50
  -3   3 -21  121.00    5.60
  -3  -3 -21  122.50    6.50
   3  -3  21  123.40    6.10
   3   3  22   17.90    4.20
  -3   3 -22   15.40    3.40
  -3   3 -22   18.80    3.20
  -3  -3 -22   13.60    3.40
   3  -3  22   10.40    3.30
  -3   3 -23   31.70    3.90
  -3   3 -23   30.30    2.50
  -3  -3 -23   35.90    3.80
  -3   3 -24    6.60    4.60
  -3   3 -24    9.70    2.00
  -3  -3 -24    6.90    3.50
  -3   3 -25   84.90    7.30
  -3  -3 -25   74.60    5.70
  -3   3 -26   28.90    4.90
  -3  -3 -26   33.30    5.60
  -3   3 -27   39.30    5.40
  -3  -3 -27   45.70    5.30
  -3   3 -28    9.70    3.80
  -3  -3 -28    4.10    4.30
  -3   3 -29   46.80    5.10
  -3  -3 -29   47.30    5.90
  -3   3 -30    4.30    4.00
  -3  -3 -30   -2.20    4.20
   3  -5 -35    6.40    4.50
   3  -5 -34   10.00    5.70
   3   5 -33   21.30    4.50
   3  -5 -33   20.60    6.70
   3   5 -32   -0.40    4.50
   3  -5 -32   11.70    7.10
   3   5 -31   26.40    4.40
   3  -5 -31   20.20    4.00
   3   5 -30    5.10    4.90
   3  -5 -30    0.10    3.90
   3   5 -29   46.70    4.60
  -3  -5  29   41.90    4.50
   3  -5 -29   43.30    4.80
   3   5 -28   18.40    3.70
  -3  -5  28   19.70    3.70
   3  -5 -28   14.60    3.60
   3   5 -27   72.60    4.90
  -3   5  27   71.00    5.80
  -3  -5  27   86.00    7.40
   3  -5 -27   74.40    4.80
   3   5 -26    2.10    3.60
  -3   5  26    5.00    3.30
  -3  -5  26   -1.30    3.30
  -3  -5  26   -0.70    2.70
   3  -5 -26    4.10    3.00
   3   5 -25   32.00    4.10
  -3   5  25   26.10    3.90
  -3  -5  25   29.90    4.30
  -3  -5  25   34.50    4.00
   3  -5 -25   31.60    3.60
   3  -5 -25   33.60    3.90
   3   5 -24   45.10    3.90
  -3   5  24   45.30    3.60
  -3  -5  24   38.20    3.70
  -3  -5  24   46.90    7.10
   3  -5 -24   48.60    3.40
   3  -5 -24   39.30    4.00
   3   5 -23  113.20    6.10
  -3   5  23  101.50    5.00
  -3  -5  23  102.50    6.00
  -3  -5  23  109.20    6.10
   3  -5 -23  113.40    5.70
   3  -5 -23  102.80    6.60
   3   5 -22   38.40    3.60
  -3   5  22   37.50    3.90
  -3  -5  22   38.80    3.40
  -3  -5  22   38.20    3.70
   3  -5 -22   43.70    3.40
   3  -5 -22   42.40    3.60
   3   5 -21   91.70    5.00
  -3   5  21   95.40    4.80
  -3  -5  21  100.60    5.40
  -3  -5  21  105.40    5.40
   3  -5 -21   91.40    4.90
   3  -5 -21   98.40    6.00
   3   5 -20   15.50    3.60
  -3   5  20   16.00    2.60
  -3  -5  20   18.50    3.40
  -3  -5  20   12.60    2.80
   3  -5 -20   20.30    2.90
   3  -5 -20   13.80    2.50
   3   5 -19  138.40    6.40
  -3   5  19  143.10    6.20
  -3  -5  19  136.20    6.20
  -3  -5  19  141.80    7.00
   3  -5 -19  135.50    6.10
   3  -5 -19  125.10    7.50
   3   5 -18   17.00    2.70
  -3   5  18   11.60    2.00
  -3  -5  18   11.80    2.10
  -3  -5  18   11.40    2.40
   3  -5 -18   13.40    1.90
   3  -5 -18   12.30    2.40
   3   5 -17   91.90    4.70
  -3   5  17   96.20    4.60
  -3  -5  17   95.80    4.60
  -3  -5  17   98.10    5.80
   3  -5 -17   95.40    4.60
   3  -5 -17   87.90    4.90
   3   5 -16    9.00    2.20
  -3   5  16    8.90    2.00
  -3  -5  16   14.50    2.30
  -3  -5  16    8.90    2.80
   3  -5 -16   10.60    2.10
   3   5 -15  197.80    7.80
  -3   5  15  201.50    7.80
  -3  -5  15  216.60    9.40
  -3  -5  15  212.60   11.10
   3  -5 -15  201.70    9.40
   3   5 -14   -5.20    1.90
  -3   5  14   -2.20    1.20
  -3  -5  14   -1.70    1.50
   3  -5 -14   -5.00    1.60
   3  -5 -14   -2.00    1.60
   3   5 -13  222.90    9.00
  -3   5  13  224.00    8.70
  -3  -5  13  221.20    8.90
  -3  -5  13  228.30    9.60
   3  -5 -13  214.90    8.60
   3  -5 -13  218.40    9.50
   3   5 -12   68.10    3.60
  -3   5  12   69.10    3.10
  -3  -5  12   67.60    3.40
  -3  -5  12   65.90    3.90
   3  -5 -12   67.70    3.30
   3  -5 -12   68.80    3.90
   3   5 -11  134.50    5.60
  -3   5  11  128.60    5.30
  -3  -5  11  129.60    5.40
  -3  -5  11  124.00    6.30
   3  -5 -11  128.40    5.40
   3   5 -10  119.50    5.20
  -3   5  10  121.10    5.00
  -3  -5  10  116.50    5.20
  -3  -5  10  122.00    5.00
   3  -5 -10  123.10    5.00
   3   5  -9  254.90    9.50
  -3   5   9  263.60    9.50
  -3  -5   9  264.00   10.40
   3  -5  -9  259.00    9.50
   3   5  -8   42.00    2.40
  -3   5   8   42.70    2.00
  -3  -5   8   42.70    2.30
   3  -5  -8   42.30    2.20
   3   5  -7  185.20    7.40
  -3   5   7  190.40    7.50
  -3  -5   7  191.70    7.70
   3  -5  -7  189.50    7.50
   3   5  -6   23.80    1.80
  -3   5   6   20.90    1.50
  -3  -5   6   22.70    1.70
   3  -5  -6   17.60    1.40
   3   5  -5  379.20   13.40
  -3   5   5  366.60   13.60
  -3  -5   5  381.70   14.30
   3  -5  -5  350.70   13.50
   3   5  -4   49.00    2.70
   3   5  -4   47.90    2.80
  -3   5   4   44.70    2.30
   3  -5  -4   45.40    2.40
   3   5  -3  680.40   22.70
   3   5  -3  667.20   23.00
  -3   5   3  657.50   22.50
  -3   5   3  646.50   23.50
   3   5  -2    0.40    0.90
  -3   5   2   -1.70    0.80
  -3   5   2   -0.10    0.70
  -3  -5   2   -0.70    0.90
   3   5  -1   63.60    2.90
  -3   5   1   58.50    2.80
  -3  -5   1   60.90    3.20
   3  -5  -1   59.80    3.10
   3   5   0  227.20    8.90
  -3   5   0  224.00    9.20
  -3  -5   0  215.90    8.20
   3  -5   0  224.80    8.50
   3   5   1  639.30   22.60
  -3   5  -1  647.00   21.90
  -3  -5  -1  643.60   22.50
   3  -5   1  634.60   21.60
   3   5   2  157.50    6.40
  -3   5  -2  161.10    6.10
  -3  -5  -2  155.20    6.30
   3  -5   2  157.10    5.90
   3   5   3  100.10    4.60
  -3   5  -3  101.60    4.30
  -3  -5  -3   99.70    4.50
   3  -5   3   98.20    4.50
   3   5   4  122.30    4.90
  -3   5  -4  115.40    4.80
  -3  -5  -4  117.40    4.70
   3  -5   4  115.80    4.90
   3   5   5  251.00    9.30
  -3   5  -5  250.70    9.80
  -3  -5  -5  249.80    9.80
   3  -5   5  262.10   10.00
   3   5   6    1.20    1.30
  -3   5  -6    1.30    1.30
  -3  -5  -6    0.40    1.20
   3  -5   6    0.80    1.10
   3   5   7  230.60    8.60
  -3   5  -7  227.80    8.60
  -3  -5  -7  231.40    8.50
   3  -5   7  238.00    8.90
   3   5   8   19.80    1.90
  -3   5  -8   23.80    1.90
  -3  -5  -8   20.70    1.90
   3  -5   8   22.20    2.00
   3   5   9  372.10   13.30
  -3   5  -9  361.20   13.50
  -3  -5  -9  359.70   13.50
   3  -5   9  380.10   14.60
   3   5  10   89.10    4.20
  -3   5 -10   89.10    4.90
  -3  -5 -10   90.90    4.30
   3  -5  10   92.50    4.70
   3   5  11   95.40    4.20
  -3   5 -11   87.30    4.60
  -3  -5 -11   92.60    4.60
   3  -5  11   90.70    4.60
   3   5  12  144.20    6.60
  -3   5 -12  144.30    6.80
  -3  -5 -12  142.60    6.10
   3  -5  12  138.40    6.30
   3   5  13   59.80    3.60
  -3   5 -13   49.90    3.50
  -3  -5 -13   53.10    3.20
  -3  -5 -13   56.10    3.00
   3  -5  13   53.90    3.50
   3   5  14   12.00    2.70
  -3  -5 -14    6.30    2.20
  -3  -5 -14    8.30    1.50
   3  -5  14    9.60    2.30
   3   5  15  256.60   10.50
  -3   5 -15  245.70   10.30
  -3  -5 -15  258.00    9.90
  -3  -5 -15  254.80   10.20
   3  -5  15  262.10   10.90
   3   5  16   -3.70    2.30
  -3   5 -16    0.70    2.50
  -3  -5 -16   -3.80    2.60
  -3  -5 -16    0.10    1.20
   3  -5  16    2.90    2.60
   3   5  17   21.20    2.90
  -3   5 -17   17.70    2.90
  -3  -5 -17   18.10    2.60
  -3  -5 -17   21.30    1.60
   3  -5  17   17.20    3.00
   3  -5  17   20.50    2.40
   3   5  18    9.30    3.40
  -3   5 -18    6.80    2.80
  -3  -5 -18   14.90    3.20
   3  -5  18    5.90    3.20
   3  -5  18   11.60    2.10
   3   5  19   45.20    4.30
  -3   5 -19   35.90    3.40
  -3  -5 -19   43.70    3.70
   3  -5  19   42.50    3.80
   3  -5  19   50.30    3.50
   3   5  20    8.40    3.20
  -3   5 -20    7.70    2.90
  -3  -5 -20    8.20    3.10
   3  -5  20    5.20    3.30
   3  -5  20    7.90    2.00
   3   5  21   76.80    5.20
  -3   5 -21   78.00    5.70
  -3  -5 -21   78.80    5.10
   3  -5  21   75.40    5.00
   3  -5  21   85.20    4.30
   3   5  22   -5.00    4.40
  -3   5 -22    0.90    3.70
  -3  -5 -22    9.90    3.60
   3  -5  22    7.10    2.00
  -3   5 -23   36.10    4.10
  -3  -5 -23   39.40    4.10
   3  -5  23   36.30    2.60
  -3   5 -24   -3.20    4.00
  -3  -5 -24    0.50    3.40
  -3   5 -25   30.30    4.60
  -3  -5 -25   37.50    4.70
  -3   5 -26   -1.30    4.20
  -3  -5 -26   -3.30    3.60
  -3   5 -27   55.90    5.20
  -3  -5 -27   49.50    5.90
  -3   5 -28   -1.70    3.30
  -3  -5 -28   -1.40    4.10
  -3   5 -29   29.50    5.20
  -3  -5 -29   20.30    5.10
  -3  -5 -30    4.50    4.90
   3  -7 -34    5.70    4.30
   3   7 -33    8.70    7.80
   3  -7 -33   -3.20    4.10
   3   7 -32   10.00    4.10
   3  -7 -32   19.20    5.30
   3   7 -31   10.80    4.40
   3  -7 -31   10.50    3.80
   3   7 -30   37.40    4.70
   3  -7 -30   38.50    4.90
   3   7 -29    7.70    4.50
  -3  -7  29    6.10    4.10
   3  -7 -29    8.10    3.70
   3   7 -28   23.30    3.80
  -3  -7  28   19.80    4.60
   3  -7 -28   18.40    3.20
   3   7 -27   60.60    4.70
  -3   7  27   34.90    4.80
  -3  -7  27   50.90    5.60
   3  -7 -27   54.70    4.00
   3   7 -26   27.60    3.90
  -3   7  26   21.80    3.40
  -3  -7  26   33.60    4.50
   3  -7 -26   33.60    4.10
   3  -7 -26   47.30    9.00
   3   7 -25   -6.60    3.90
  -3   7  25    4.40    3.40
  -3  -7  25   -0.80    3.20
  -3  -7  25   10.90    5.30
   3  -7 -25   -3.00    3.20
   3  -7 -25    3.90    2.90
   3   7 -24   47.40    5.10
  -3   7  24   46.70    4.80
  -3  -7  24   49.70    4.20
  -3  -7  24   49.70    4.00
   3  -7 -24   54.10    4.20
   3  -7 -24   48.20    4.70
   3   7 -23   68.80    5.90
  -3   7  23   64.60    4.40
  -3  -7  23   69.40    5.90
  -3  -7  23   62.10    5.90
   3  -7 -23   66.60    4.50
   3  -7 -23   60.00    4.40
   3   7 -22   68.30    4.50
  -3   7  22   64.50    4.30
  -3  -7  22   72.20    5.00
  -3  -7  22   73.20    5.20
   3  -7 -22   66.30    4.00
   3  -7 -22   66.10    5.20
   3   7 -21   60.80    4.20
  -3   7  21   61.20    3.80
  -3  -7  21   63.20    4.00
  -3  -7  21   61.60    4.80
   3  -7 -21   65.60    3.90
   3  -7 -21   68.60    4.20
   3   7 -20   31.40    3.60
  -3   7  20   24.50    2.50
  -3  -7  20   34.60    3.80
  -3  -7  20   25.50    3.60
   3  -7 -20   26.70    3.10
   3  -7 -20   23.10    3.30
   3   7 -19    9.80    2.80
  -3   7  19    8.20    2.50
  -3  -7  19    7.70    2.50
  -3  -7  19   10.70    2.60
   3  -7 -19    6.30    2.00
   3  -7 -19    4.60    2.20
   3   7 -18   40.70    3.20
  -3   7  18   48.00    3.50
  -3  -7  18   46.60    3.40
   3  -7 -18   39.30    2.80
   3  -7 -18   44.40    3.50
   3   7 -17   60.20    3.50
  -3   7  17   57.50    3.10
  -3  -7  17   53.50    3.50
   3  -7 -17   57.20    3.30
   3  -7 -17   57.00    4.10
   3   7 -16   36.30    2.80
  -3   7  16   45.70    2.90
  -3  -7  16   40.00    2.80
   3  -7 -16   35.90    2.40
   3  -7 -16   45.90    4.20
   3   7 -15   50.20    3.40
  -3   7  15   48.80    2.90
  -3  -7  15   51.90    3.40
  -3  -7  15   56.20    3.50
   3  -7 -15   53.80    3.40
   3  -7 -15   48.80    3.60
   3   7 -14   56.00    3.60
  -3   7  14   58.90    3.20
  -3  -7  14   60.20    3.20
  -3  -7  14   62.10    3.60
   3  -7 -14   53.60    3.20
   3   7 -13   57.40    3.20
  -3   7  13   60.00    3.10
  -3  -7  13   58.00    3.30
  -3  -7  13   57.40    3.90
   3  -7 -13   55.00    2.90
   3   7 -12   68.90    3.60
  -3   7  12   68.00    3.40
  -3  -7  12   75.40    3.90
  -3  -7  12   68.40    3.80
   3  -7 -12   69.00    3.50
   3   7 -11   30.70    2.50
  -3   7  11   33.10    2.10
  -3  -7  11   32.40    2.10
   3  -7 -11   33.30    2.40
   3   7 -10  163.00    6.40
  -3   7  10  158.80    6.10
  -3  -7  10  169.60    7.00
   3  -7 -10  159.40    6.90
   3   7  -9  390.00   14.10
  -3   7   9  390.70   14.30
  -3  -7   9  376.80   14.10
   3  -7  -9  375.50   14.30
   3   7  -8  229.90    9.10
  -3   7   8  234.40    8.90
  -3  -7   8  236.70    9.00
   3  -7  -8  226.90    8.40
   3   7  -7  234.10    9.60
  -3   7   7  228.00    9.20
  -3  -7   7  249.10    9.20
   3  -7  -7  236.10    9.60
   3   7  -6  149.50    6.50
  -3   7   6  143.50    6.30
  -3  -7   6  154.00    5.90
   3  -7  -6  145.60    6.30
   3   7  -5   31.00    2.10
   3   7  -5   33.00    2.20
  -3   7   5   34.90    2.20
   3  -7  -5   36.90    3.40
   3   7  -4   89.20    4.40
   3   7  -4   93.40    4.40
  -3   7   4   96.20    4.20
   3  -7  -4  112.80    5.10
   3   7  -3  183.50    7.90
   3   7  -3  200.70    7.40
  -3   7   3  186.30    7.60
  -3   7   3  183.70    7.70
   3   7  -2  363.10   13.70
  -3   7   2  350.50   13.10
  -3   7   2  370.60   13.10
  -3  -7   2  341.40   13.00
   3   7  -1   78.50    3.80
  -3   7   1   79.00    3.90
  -3   7   1   80.20    3.50
  -3  -7   1   84.60    3.90
   3   7   0  109.20    4.90
  -3   7   0  108.70    5.10
  -3  -7   0  106.20    4.90
   3  -7   0  118.10    8.00
   3   7   1    2.30    1.80
  -3   7  -1    0.60    1.40
  -3  -7  -1    5.70    2.00
   3  -7   1    3.30    1.80
   3   7   2  358.40   13.50
  -3   7  -2  340.20   12.70
  -3  -7  -2  345.20   13.00
   3  -7   2  352.00   12.80
   3   7   3  439.00   15.70
  -3   7  -3  438.50   15.80
  -3  -7  -3  440.40   15.20
   3  -7   3  440.20   16.30
   3   7   4  281.70   10.70
  -3   7  -4  272.20   10.20
  -3  -7  -4  280.50   10.40
   3  -7   4  287.80   10.20
   3   7   5   18.10    1.70
  -3   7  -5   15.70    1.90
  -3  -7  -5   17.10    1.70
   3  -7   5   17.20    1.70
   3   7   6   21.10    2.10
  -3   7  -6   23.20    2.00
  -3  -7  -6   22.50    2.00
   3  -7   6   21.80    1.80
   3   7   7  162.90    7.00
  -3   7  -7  170.80    6.80
  -3  -7  -7  160.50    6.80
   3  -7   7  162.00    6.40
   3  -7   7  163.40    5.70
   3   7   8  168.10    6.70
  -3   7  -8  178.00    7.20
  -3  -7  -8  167.00    6.40
   3  -7   8  182.40    7.00
   3   7   9   82.60    4.00
  -3   7  -9   76.10    3.80
  -3  -7  -9   70.30    4.00
   3  -7   9   79.30    4.00
   3   7  10   27.90    2.40
  -3   7 -10   27.30    2.40
  -3  -7 -10   24.90    2.20
   3  -7  10   25.20    2.40
   3   7  11   93.20    4.70
  -3   7 -11   85.90    4.40
  -3  -7 -11   94.30    4.70
   3  -7  11   90.90    4.70
   3   7  12  178.70    7.60
  -3   7 -12  166.60    6.90
  -3  -7 -12  168.10    6.80
   3  -7  12  184.60    7.80
   3   7  13   38.70    3.30
  -3   7 -13   41.10    3.00
  -3  -7 -13   42.20    2.80
   3  -7  13   39.10    3.40
   3   7  14   83.80    4.40
  -3   7 -14   76.30    4.10
  -3  -7 -14   84.30    4.10
   3  -7  14   76.50    4.40
   3   7  15  120.70    5.40
  -3   7 -15  110.40    5.70
  -3  -7 -15  121.20    5.90
   3  -7  15  125.00    6.20
   3   7  16  110.70    6.50
  -3   7 -16  105.40    5.60
  -3  -7 -16  105.50    5.40
  -3  -7 -16   97.80    4.90
   3  -7  16  101.90    5.10
   3   7  17    1.20    2.70
  -3   7 -17    2.10    2.90
  -3  -7 -17    7.90    3.10
  -3  -7 -17    2.20    1.60
   3  -7  17   -2.30    2.40
   3   7  18  121.00    6.10
  -3   7 -18  120.50    6.80
  -3  -7 -18  118.20    5.80
  -3  -7 -18  117.40    5.50
   3  -7  18  112.50    6.40
   3   7  19  100.70    5.40
  -3   7 -19   98.10    5.70
  -3  -7 -19  103.50    5.50
  -3  -7 -19  101.10    5.00
   3  -7  19   95.70    5.80
   3   7  20   51.00    3.90
  -3   7 -20  127.50   21.30
  -3  -7 -20   43.10    3.80
  -3  -7 -20   45.70    2.80
   3  -7  20   59.80    4.70
   3  -7  20   43.10    3.90
   3   7  21    2.50    3.40
  -3   7 -21    2.30    3.40
  -3  -7 -21    3.70    2.90
   3  -7  21    1.70    2.50
  -3   7 -22   40.00    4.40
  -3  -7 -22   42.00    5.90
   3  -7  22   32.20    3.10
  -3   7 -23   32.60    4.20
  -3  -7 -23   32.00    5.40
   3  -7  23   22.50    2.80
  -3   7 -24   33.10    4.70
  -3  -7 -24   33.90    4.40
   3  -7  24   30.30    3.40
  -3   7 -25    4.10    3.70
  -3  -7 -25    7.50    3.90
  -3   7 -26   35.20    5.10
  -3  -7 -26   36.00    4.80
  -3   7 -27   13.70    4.00
  -3  -7 -27   18.30    4.50
  -3   7 -28   13.10    4.40
  -3  -7 -28   15.30    4.40
  -3   7 -29   -1.20    4.20
  -3  -7 -29    2.00    3.80
   3  -9 -33   52.40   10.90
   3   9 -32    8.20    4.20
   3  -9 -32    1.80    4.40
   3   9 -31    1.80    3.90
   3  -9 -31    9.00    3.80
   3   9 -30   51.40    5.70
   3  -9 -30   72.30    8.80
   3   9 -29    2.00    5.10
   3  -9 -29    6.00    4.10
   3   9 -28   27.80    4.90
   3  -9 -28   25.20    4.40
   3   9 -27   -3.10    3.70
  -3  -9  27   -2.30    2.80
   3  -9 -27   -1.30    3.60
   3   9 -26   91.70    6.10
  -3   9  26   64.90    5.30
  -3  -9  26   84.30    6.20
   3  -9 -26   81.50    4.80
   3  -9 -26   74.50    5.70
   3   9 -25    1.70    4.00
  -3   9  25    4.90    3.50
  -3  -9  25    0.50    3.70
   3  -9 -25    0.70    2.60
   3  -9 -25    0.30    3.10
   3   9 -24   13.60    3.30
  -3   9  24   18.70    3.00
  -3  -9  24   23.50    4.80
   3  -9 -24   15.00    3.10
   3  -9 -24   15.20    3.20
   3   9 -23    2.30    3.20
  -3   9  23   -2.20    3.80
  -3  -9  23    0.10    3.20
  -3  -9  23    2.30    3.10
   3  -9 -23    0.70    2.90
   3  -9 -23   -1.60    2.30
   3   9 -22  197.50    8.70
  -3   9  22  169.50    7.90
  -3  -9  22  173.80    9.00
  -3  -9  22  196.40   10.20
   3  -9 -22  192.30    8.00
   3  -9 -22  177.10    8.40
   3   9 -21    1.90    3.00
  -3   9  21   -1.20    3.10
  -3  -9  21    6.70    4.20
  -3  -9  21    8.10    4.20
   3  -9 -21    3.20    2.90
   3  -9 -21    2.30    2.90
   3   9 -20   22.90    3.50
  -3   9  20   25.20    2.80
  -3  -9  20   52.50   15.30
   3  -9 -20   23.20    2.60
   3  -9 -20   21.70    3.10
   3   9 -19    7.00    2.70
  -3   9  19   12.40    2.90
  -3  -9  19    6.40    2.80
   3  -9 -19    7.00    2.00
   3  -9 -19   18.50    4.60
   3   9 -18  308.40   12.30
  -3   9  18  270.30   11.00
  -3  -9  18  301.00   11.90
   3  -9 -18  279.20   11.60
   3  -9 -18  288.80   12.90
   3   9 -17   16.30    3.50
  -3   9  17   12.80    1.90
  -3  -9  17   16.70    2.70
   3  -9 -17   14.10    2.60
   3   9 -16    9.90    2.50
  -3   9  16   10.40    1.90
  -3  -9  16   10.80    2.40
  -3  -9  16   15.10    2.40
   3  -9 -16   12.00    2.10
   3   9 -15   -0.60    2.20
  -3   9  15   -2.10    1.50
  -3  -9  15    0.70    4.20
  -3  -9  15   -1.30    2.30
   3  -9 -15   -1.50    1.90
   3   9 -14  280.70   11.50
  -3   9  14  270.10   10.30
  -3  -9  14  282.20   10.80
  -3  -9  14  274.40   10.90
   3  -9 -14  276.10   10.80
   3   9 -13   -1.30    1.80
  -3   9  13   -3.50    1.80
  -3  -9  13   -0.10    1.80
   3  -9 -13    0.00    2.30
   3   9 -12   66.20    3.60
  -3   9  12   69.90    3.20
  -3  -9  12   69.60    3.80
   3  -9 -12   73.40    3.90
   3   9 -11   10.90    2.10
  -3   9  11   11.30    1.50
  -3  -9  11   12.30    2.20
   3  -9 -11   11.30    1.90
   3   9 -10  180.10    7.50
  -3   9  10  194.90    7.60
  -3  -9  10  192.00    7.90
   3  -9 -10  182.50    7.70
   3   9  -9   54.50    3.20
  -3   9   9   56.10    3.10
  -3  -9   9   47.50    3.10
   3  -9  -9   51.60    3.10
   3   9  -8  135.00    6.20
  -3   9   8  137.70    5.50
  -3  -9   8  139.90    5.70
   3  -9  -8  133.80    6.00
   3   9  -7    1.40    2.00
  -3   9   7    0.90    1.70
  -3  -9   7    1.80    1.80
   3  -9  -7    3.90    2.50
   3   9  -6  474.60   17.30
   3   9  -6  495.40   17.50
  -3   9   6  491.40   17.90
   3  -9  -6  483.40   17.60
   3   9  -5    9.20    2.60
   3   9  -5   11.30    2.30
  -3   9   5    7.30    1.70
   3  -9  -5   11.80    2.10
   3   9  -4  237.20    9.30
   3   9  -4  247.40    9.30
  -3   9   4  233.50   10.10
  -3   9   4  243.20    9.00
   3   9  -3   16.00    2.50
   3   9  -3   19.60    2.70
  -3   9   3   15.20    2.10
  -3   9   3   37.80    7.50
   3   9  -2  255.40   10.00
   3   9  -2  250.10   10.70
  -3   9   2  257.20   10.90
  -3   9   2  277.10   12.10
   3   9  -1   39.90    2.90
  -3   9   1   37.10    2.70
  -3   9   1   36.10    2.30
  -3  -9   1   43.30    2.80
   3   9   0  178.60    7.70
  -3   9   0  169.40    6.80
  -3   9   0  175.30    7.10
  -3  -9   0  169.50    6.80
   3   9   1    9.10    2.90
  -3   9  -1    5.10    2.10
  -3  -9  -1   20.70    3.00
   3  -9   1   13.20    3.10
   3   9   2  499.10   19.00
  -3   9  -2  499.60   17.80
  -3  -9  -2  478.60   18.60
   3  -9   2  486.30   18.10
   3   9   3    1.60    2.00
  -3   9  -3    1.50    1.80
  -3  -9  -3    1.20    1.90
   3  -9   3   -1.20    1.80
   3   9   4   52.00    2.90
  -3   9  -4   52.30    3.20
  -3  -9  -4   49.40    2.90
   3  -9   4   53.80    3.40
   3   9   5    3.00    1.70
  -3   9  -5    5.70    1.70
  -3  -9  -5    5.30    2.00
   3  -9   5    2.90    1.50
   3   9   6  262.80    9.60
  -3   9  -6  266.00   11.20
  -3  -9  -6  252.40    9.70
   3  -9   6  267.50   10.10
   3   9   7   26.40    2.20
  -3   9  -7   30.80    2.30
  -3  -9  -7   33.00    3.00
   3  -9   7   28.40    2.30
   3   9   8  130.50    6.00
  -3   9  -8  134.20    6.40
  -3  -9  -8  129.30    5.70
   3  -9   8  130.80    6.30
   3   9   9   -0.80    1.80
  -3   9  -9   -0.10    2.00
  -3  -9  -9    3.40    1.80
   3  -9   9    2.50    1.90
   3   9  10  255.80   10.20
  -3   9 -10  268.30   10.60
   3  -9  10  267.10   10.20
   3   9  11    8.30    2.50
  -3   9 -11    5.20    2.20
   3  -9  11    7.90    2.30
   3   9  12   68.60    3.90
  -3   9 -12   66.10    3.80
  -3  -9 -12   68.90    4.10
   3  -9  12   67.20    3.60
   3   9  13   23.90    2.50
  -3   9 -13   20.10    2.70
  -3  -9 -13   21.10    2.50
   3  -9  13   21.60    3.00
   3   9  14   96.10    5.30
  -3   9 -14   97.20    5.20
  -3  -9 -14  101.70    4.80
   3  -9  14  101.30    5.10
   3   9  15    4.30    3.00
  -3   9 -15    8.40    2.60
  -3  -9 -15    3.70    2.50
   3  -9  15    2.20    2.50
   3   9  16   52.40    3.60
  -3   9 -16   58.70    4.00
  -3  -9 -16   56.90    4.00
   3  -9  16   61.10    4.50
   3   9  17   -6.30    2.80
  -3   9 -17    2.60    1.90
  -3  -9 -17    2.40    2.60
   3  -9  17    0.10    2.80
   3   9  18  145.70    7.10
  -3   9 -18  159.40    7.70
  -3  -9 -18  154.40    7.00
  -3  -9 -18  145.00    6.80
   3  -9  18  149.20    7.40
   3   9  19   -4.80    3.40
  -3   9 -19    1.10    3.50
  -3  -9 -19   -2.40    3.00
  -3  -9 -19    1.80    2.50
   3  -9  19   -1.00    3.30
   3   9  20   82.30    5.50
  -3   9 -20   96.90    6.20
  -3  -9 -20   95.80    5.50
  -3  -9 -20   86.30    4.70
  -3   9 -21    8.00    4.10
  -3  -9 -21    5.50    5.10
  -3  -9 -21    1.40    1.70
  -3   9 -22   33.60    4.90
  -3  -9 -22   33.40    5.80
  -3  -9 -22   25.20    2.40
   3  -9  22   32.90    4.50
  -3   9 -23   15.20    4.10
  -3  -9 -23   19.80    4.60
   3  -9  23   13.80    3.00
  -3   9 -24   84.70    6.30
  -3  -9 -24   89.60    6.90
  -3   9 -25   -3.90    3.50
  -3  -9 -25  -11.40    4.10
  -3   9 -26   21.80    6.80
  -3  -9 -26   17.10    3.60
  -3   9 -27    5.00    4.20
  -3  -9 -27    7.10    4.30
  -3   9 -28   30.50    4.80
  -3  -9 -28   25.60    4.40
  -3  -9 -29   11.40    5.20
   3 -11 -32   58.90   10.20
   3 -11 -31    9.70    4.00
   3  11 -30   12.20    4.50
   3 -11 -30   13.90    4.00
   3  11 -29    1.30    4.60
   3 -11 -29   11.50    6.10
   3  11 -28   23.40    5.50
  -3 -11  28   20.10    4.70
   3 -11 -28   30.40    5.10
   3  11 -27   16.70    5.60
  -3 -11  27    9.30    3.60
   3 -11 -27   13.60    3.50
   3  11 -26   17.00    4.50
  -3 -11  26   15.50    5.00
   3 -11 -26   22.10    3.90
   3  11 -25   23.90    4.90
  -3  11  25    8.20    3.30
  -3 -11  25   25.10    3.90
   3 -11 -25   20.40    3.10
   3 -11 -25   22.70    3.50
   3  11 -24   29.00    4.00
  -3  11  24   29.20    4.50
  -3 -11  24   40.50    5.80
   3 -11 -24   34.90    3.30
   3 -11 -24   31.50    3.70
   3  11 -23   22.80    4.40
  -3  11  23   19.00    3.10
  -3 -11  23   19.30    4.00
   3 -11 -23   22.70    3.20
   3 -11 -23   23.40    3.90
   3  11 -22   44.50    4.10
  -3  11  22   46.60    3.90
   3 -11 -22   43.40    3.70
   3 -11 -22   51.70    4.60
   3  11 -21   14.80    3.30
  -3  11  21   10.00    4.90
  -3 -11  21   16.30    3.90
   3 -11 -21   15.30    2.80
   3 -11 -21   17.00    3.60
   3  11 -20  101.90    6.10
  -3  11  20  108.70    5.30
  -3 -11  20   94.50    5.70
   3 -11 -20  109.00    5.90
   3 -11 -20   99.90    6.10
   3  11 -19   34.10    3.40
  -3  11  19   41.60    3.40
  -3 -11  19   36.30    3.80
   3 -11 -19   33.40    2.80
   3  11 -18   26.60    3.80
  -3  11  18   27.00    3.30
  -3 -11  18   30.40    3.90
  -3 -11  18   28.80    2.80
   3 -11 -18   24.20    3.10
   3  11 -17   31.70    3.20
  -3  11  17   34.20    3.10
  -3 -11  17   27.00    3.20
  -3 -11  17   30.40    2.90
   3 -11 -17   29.30    2.80
   3  11 -16   35.00    5.80
  -3  11  16   27.00    3.00
  -3 -11  16   27.70    2.90
  -3 -11  16   24.00    2.60
   3 -11 -16   26.50    2.90
   3  11 -15    9.30    3.10
  -3  11  15   11.30    2.10
  -3 -11  15    9.80    2.40
  -3 -11  15   13.10    2.40
   3 -11 -15   11.80    2.20
   3  11 -14   55.60    3.40
  -3  11  14   47.30    2.90
  -3 -11  14   51.90    3.20
   3 -11 -14   47.30    3.30
   3  11 -13   41.10    3.20
  -3  11  13   39.30    2.70
  -3 -11  13   41.80    3.30
   3 -11 -13   38.00    2.80
   3  11 -12  192.70    7.90
  -3  11  12  192.80    7.60
  -3 -11  12  196.80    7.90
   3 -11 -12  188.90    8.20
   3  11 -11   97.70    4.60
  -3  11  11   87.50    4.00
  -3 -11  11   95.00    4.50
   3 -11 -11   93.70    4.70
   3  11 -10   33.30    2.60
  -3  11  10   33.60    2.40
  -3 -11  10   26.90    2.50
   3 -11 -10   37.10    3.50
   3  11  -9  141.60    6.50
  -3  11   9  147.90    6.20
  -3 -11   9  145.60    6.20
   3 -11  -9  147.30    6.50
   3  11  -8   31.80    2.80
   3  11  -8   34.90    2.60
  -3  11   8   39.50    3.30
  -3 -11   8   32.00    2.80
   3 -11  -8   38.70    2.90
   3  11  -7    8.50    2.30
   3  11  -7    3.80    1.90
  -3  11   7   12.80    3.00
   3 -11  -7   11.70    2.40
   3  11  -6  110.10    6.60
   3  11  -6  110.20    4.90
  -3  11   6  113.00    5.00
   3 -11  -6  121.20    5.10
   3  11  -5  273.10   10.40
   3  11  -5  248.10    9.90
  -3  11   5  260.80   10.70
  -3  11   5  258.70   10.70
   3  11  -4  198.60    9.00
   3  11  -4  184.40    8.10
  -3  11   4  183.60    8.20
  -3  11   4  201.00    8.30
   3  11  -3   -0.20    2.00
   3  11  -3    0.60    2.20
  -3  11   3    5.40    1.90
  -3  11   3    0.60    1.80
   3  11  -2   12.10    2.10
   3  11  -2   13.20    1.80
  -3  11   2   17.20    2.00
  -3  11   2   19.70    2.00
   3  11  -1   57.00    3.50
   3  11  -1   67.70    3.60
  -3  11   1   62.80    3.40
  -3  11   1   61.80    3.10
   3  11   0  130.60    6.30
  -3  11   0  133.70    6.60
  -3  11   0  140.20    5.90
  -3 -11   0  130.30    5.70
   3  11   1   58.50    3.40
  -3  11  -1   59.40    3.10
  -3  11  -1   54.80    3.20
  -3 -11  -1   59.30    3.40
   3  11   2  212.00    8.30
  -3  11  -2  202.20    8.30
  -3 -11  -2  204.00    8.10
   3 -11   2  204.80    8.20
   3  11   3   88.00    4.30
  -3  11  -3   82.80    4.50
  -3 -11  -3   83.40    4.00
   3 -11   3   92.20    4.40
   3  11   4  104.60    4.90
  -3  11  -4   97.00    5.10
  -3 -11  -4  104.50    4.90
   3 -11   4  103.50    5.10
   3  11   5   56.40    3.40
  -3  11  -5   61.00    3.70
  -3 -11  -5   62.90    3.50
   3 -11   5   63.80    3.20
   3  11   6  165.00    6.80
  -3  11  -6  166.00    6.70
  -3 -11  -6  154.50    6.40
   3 -11   6  169.90    7.10
   3  11   7  129.50    5.70
  -3  11  -7  140.40    6.20
  -3 -11  -7  130.50    6.20
   3 -11   7  132.70    5.70
   3  11   8  249.60    9.80
  -3  11  -8  231.60    9.90
  -3 -11  -8  240.60    9.00
   3 -11   8  231.90    9.10
   3  11   9    1.80    2.20
  -3  11  -9    0.50    2.20
  -3 -11  -9    2.50    2.10
   3 -11   9   -0.40    2.70
   3  11  10   14.30    2.30
  -3  11 -10   15.30    3.20
  -3 -11 -10   12.30    2.50
   3 -11  10   14.80    2.70
   3  11  11  281.70   11.30
  -3  11 -11  290.20   12.40
  -3 -11 -11  304.60   12.30
   3 -11  11  296.20   11.70
   3  11  12   66.60    4.20
  -3  11 -12   61.00    4.00
  -3 -11 -12   58.80    3.90
   3 -11  12   58.60    3.90
   3  11  13    9.90    2.40
  -3  11 -13    8.40    2.50
  -3 -11 -13    6.40    2.70
   3 -11  13    2.30    2.60
   3  11  14  100.00    5.20
  -3  11 -14  101.40    5.50
  -3 -11 -14  111.50    5.50
   3 -11  14   99.20    5.50
   3  11  15   98.80    5.60
  -3  11 -15  107.50    6.30
  -3 -11 -15  107.00    5.60
   3 -11  15  105.90    5.80
   3  11  16   44.70    3.90
  -3  11 -16   46.90    3.90
  -3 -11 -16   56.10    3.90
   3 -11  16   43.90    4.00
   3  11  17   30.20    3.30
  -3  11 -17   38.10    3.90
  -3 -11 -17   35.80    3.30
   3 -11  17   37.50    3.90
   3  11  18   21.70    3.10
  -3  11 -18   28.80    4.00
  -3 -11 -18   25.00    4.00
   3 -11  18   27.90    7.80
   3  11  19  103.00    6.10
  -3  11 -19  121.40    6.90
  -3 -11 -19  122.60    5.90
  -3  11 -20   30.60    4.50
  -3 -11 -20   25.60    4.50
  -3 -11 -20   29.10    2.80
  -3  11 -21    0.70    3.90
  -3 -11 -21    4.40    3.20
  -3 -11 -21    1.90    2.20
  -3  11 -22   33.30    5.80
  -3 -11 -22   26.90    3.80
  -3  11 -23   69.50    6.30
  -3 -11 -23   64.60    6.20
  -3  11 -24   16.40    4.90
  -3 -11 -24    9.80    4.20
  -3  11 -25    6.80    4.30
  -3 -11 -25    3.60    3.90
  -3  11 -26   18.20    5.10
  -3 -11 -26   16.80    4.70
  -3 -11 -27   21.60    4.80
  -3 -11 -28    4.20    5.60
   3 -13 -31    4.10    3.00
   3 -13 -30    0.40    3.20
   3  13 -29   -3.90    4.00
   3 -13 -29    2.50    4.50
   3  13 -28   17.20    6.00
  -3 -13  28   17.60    7.10
   3 -13 -28   16.00    4.50
   3  13 -27   20.50    5.50
  -3 -13  27   46.30    8.80
   3 -13 -27   23.70    4.40
   3  13 -26   59.50   16.30
  -3 -13  26   -1.70    3.80
   3 -13 -26    2.00    3.50
   3  13 -25   44.70    5.20
  -3 -13  25   41.40    5.50
   3 -13 -25   34.40    4.60
   3  13 -24   10.30    4.00
   3 -13 -24   10.20    3.50
   3 -13 -24   11.80    3.20
   3  13 -23   33.80    4.80
  -3  13  23   32.80    4.30
   3 -13 -23   28.30    3.80
   3 -13 -23   28.90    3.80
   3  13 -22    4.60    4.00
  -3  13  22    5.60    3.30
   3 -13 -22    0.10    3.30
   3 -13 -22    5.00    3.20
   3  13 -21   44.50    4.80
  -3  13  21   45.20    4.00
   3 -13 -21   51.30    3.70
   3 -13 -21   44.90    4.50
   3  13 -20    4.80    5.40
  -3  13  20    5.50    2.90
   3 -13 -20    2.80    2.30
   3  13 -19   79.20    5.80
  -3  13  19   75.30    5.00
  -3 -13  19   72.80    5.20
  -3 -13  19   74.10    4.40
   3 -13 -19   72.50    4.60
   3  13 -18   -0.40    3.30
  -3  13  18   -1.20    2.60
  -3 -13  18    0.20    2.80
  -3 -13  18    3.50    2.50
   3 -13 -18    1.70    3.90
   3  13 -17  118.30    6.20
  -3  13  17  109.10    5.30
  -3 -13  17  107.30    6.40
  -3 -13  17  110.10    5.30
   3 -13 -17  106.20    5.50
   3  13 -16   30.90    5.30
  -3  13  16   29.30    3.50
  -3 -13  16   28.60    3.90
   3  13 -15  134.50    7.00
  -3  13  15  141.70    6.00
  -3 -13  15  143.20    7.00
   3  13 -14    8.30    3.30
  -3  13  14    5.00    1.90
  -3 -13  14    5.30    2.40
   3 -13 -14    3.50    2.20
   3  13 -13   56.30    3.50
  -3  13  13   58.00    4.00
  -3 -13  13   57.80    4.20
   3 -13 -13   57.10    3.60
   3  13 -12   23.10    2.70
  -3  13  12   27.70    2.70
  -3 -13  12   22.70    3.40
   3 -13 -12   22.10    3.00
   3  13 -11  199.80    9.10
  -3  13  11  209.90    8.30
  -3 -13  11  205.70    8.60
   3 -13 -11  190.50    8.50
   3  13 -10   -2.00    2.40
  -3  13  10   -2.30    2.30
  -3 -13  10    3.30    2.40
   3 -13 -10   -0.90    2.50
   3  13  -9   88.90    5.30
   3  13  -9   91.50    4.70
  -3  13   9   92.40    4.50
   3 -13  -9   99.20    4.60
   3  13  -8   19.30    2.70
   3  13  -8   14.10    2.10
  -3  13   8   21.80    2.70
   3 -13  -8   24.10    3.00
   3  13  -7  199.50    8.20
   3  13  -7  202.40    8.10
  -3  13   7  207.00    8.30
   3 -13  -7  204.60    8.00
   3  13  -6    7.50    2.90
   3  13  -6    6.60    2.10
  -3  13   6   12.00    2.90
  -3  13   6   11.80    2.30
   3  13  -5   98.70    5.20
   3  13  -5  100.10    4.90
  -3  13   5   96.90    4.60
  -3  13   5  103.10    4.50
   3  13  -4   31.10    3.10
   3  13  -4   29.80    2.80
  -3  13   4   30.10    2.80
  -3  13   4   26.70    2.50
   3  13  -3  128.10    5.80
   3  13  -3  133.50    5.80
  -3  13   3  136.00    6.10
  -3  13   3  135.90    6.20
   3  13  -2    7.10    2.80
   3  13  -2    4.20    2.10
  -3  13   2    4.90    2.20
  -3  13   2    0.70    2.30
   3  13  -1   86.30    4.10
   3  13  -1   84.50    4.50
  -3  13   1   89.40    4.70
  -3  13   1   83.30    4.40
   3  13   0   18.00    2.40
   3  13   0   20.70    2.80
  -3  13   0   15.70    2.40
  -3  13   0   14.90    2.20
   3  13   1  158.70    6.90
  -3  13  -1  162.70    6.80
  -3  13  -1  150.40    6.90
  -3 -13  -1  153.10    6.80
   3  13   2   15.00    2.70
  -3  13  -2    9.50    2.40
  -3  13  -2    8.00    2.60
  -3 -13  -2    8.30    2.20
   3  13   3   27.20    2.60
  -3  13  -3   23.30    2.50
  -3  13  -3   23.80    2.40
  -3 -13  -3   20.60    2.50
   3  13   4    4.30    2.20
  -3  13  -4    3.40    2.10
  -3 -13  -4   -1.70    2.20
   3 -13   4    4.70    3.80
   3  13   5  186.00    8.10
  -3  13  -5  174.80    7.60
  -3 -13  -5  187.90    8.40
   3 -13   5  186.00    7.80
   3  13   6    0.00    2.40
  -3  13  -6   -2.80    2.00
  -3 -13  -6    3.30    2.20
   3 -13   6   -0.30    2.30
   3  13   7  135.80    5.80
  -3  13  -7  129.60    6.60
  -3 -13  -7  124.60    5.80
   3 -13   7  135.90    5.50
   3  13   8   56.80    3.50
  -3  13  -8   56.10    3.80
  -3 -13  -8   54.70    4.00
   3 -13   8   55.20    3.40
   3  13   9   95.30    4.60
  -3  13  -9   94.90    5.20
  -3 -13  -9   94.80    4.80
   3 -13   9   97.50    5.30
   3  13  10    0.80    2.50
  -3  13 -10    7.00    2.40
   3 -13  10    0.90    2.40
   3  13  11   59.50    4.40
  -3  13 -11   57.70    4.50
   3 -13  11   68.50    6.10
   3  13  12   21.90    3.10
  -3  13 -12   22.90    3.30
   3 -13  12   30.40    8.20
   3  13  13  158.50    7.40
  -3  13 -13  168.30    8.20
   3 -13  13  164.20    7.50
   3  13  14    0.80    2.80
  -3  13 -14    4.00    3.10
  -3 -13 -14   -0.60    3.50
   3 -13  14   -0.50    3.40
   3  13  15   37.60    3.40
  -3  13 -15   38.40    4.10
  -3 -13 -15   45.10    4.40
   3 -13  15   46.40    4.20
   3  13  16    0.00    2.60
  -3  13 -16   -1.20    3.10
  -3 -13 -16    3.10    3.70
   3 -13  16    1.50    4.80
   3  13  17   59.10    4.40
  -3  13 -17   75.20    5.20
  -3 -13 -17   71.70    4.80
  -3  13 -18    0.60    3.60
  -3 -13 -18   -1.20    3.00
  -3  13 -19   78.30    6.00
  -3 -13 -19   85.60    5.80
  -3  13 -20    4.20    4.50
  -3 -13 -20    4.10    4.10
  -3  13 -21   32.60    4.70
  -3 -13 -21   39.20    4.50
  -3  13 -22   -3.50    3.90
  -3 -13 -22   -2.20    3.50
  -3  13 -23   65.90    6.60
  -3 -13 -23   70.10    5.60
  -3  13 -24    4.80    5.20
  -3 -13 -24    1.30    3.60
  -3  13 -25   18.10    4.70
  -3 -13 -25   23.90    4.30
  -3 -13 -26    9.30    4.10
   3 -15 -30   -0.80    2.20
   3 -15 -29   13.60    4.20
   3 -15 -28    1.30    4.30
   3  15 -27   16.90    5.00
  -3 -15  27   10.00    5.80
   3 -15 -27   17.90    4.10
   3  15 -26    3.40    4.00
  -3 -15  26    6.00    5.30
   3 -15 -26    5.40    3.10
   3  15 -25   23.30    4.80
   3 -15 -25   24.50    4.10
   3  15 -24   16.70    5.80
   3 -15 -24    6.70    4.00
   3  15 -23    9.90    4.20
   3 -15 -23   12.80    3.00
   3 -15 -23    9.40    4.50
   3  15 -22   13.70    4.40
   3 -15 -22   10.60    2.90
   3  15 -21   68.60    7.30
  -3  15  21   35.90    3.90
   3 -15 -21   48.60    3.90
   3  15 -20   12.70    3.70
  -3  15  20    1.40    2.60
   3 -15 -20    4.20    2.50
   3  15 -19   26.90    4.40
  -3  15  19   19.70    3.00
  -3 -15  19   24.10    2.80
   3 -15 -19   24.30    3.30
   3  15 -18   17.50    3.30
  -3  15  18   15.00    3.00
  -3 -15  18   14.20    2.60
   3 -15 -18   11.30    2.60
   3  15 -17   55.10    4.40
  -3  15  17   54.70    4.20
  -3 -15  17   57.70    4.20
   3 -15 -17   54.60    3.90
   3  15 -16   22.80    3.80
  -3  15  16   18.50    3.10
  -3 -15  16   14.90    3.40
   3 -15 -16   20.90    2.80
   3  15 -15  106.50    7.20
  -3  15  15   98.90    5.20
  -3 -15  15  108.30    6.10
   3 -15 -15  103.90    5.60
   3  15 -14    3.60    3.90
  -3  15  14    5.60    2.50
  -3 -15  14   -1.70    2.50
   3  15 -13    1.00    3.60
  -3  15  13    5.60    2.40
  -3 -15  13    3.90    2.70
   3  15 -12   31.80    3.30
   3  15 -12   30.20    3.00
  -3  15  12   34.20    3.00
   3 -15 -12   35.00    2.80
   3  15 -11   98.80    5.10
   3  15 -11   91.00    5.30
  -3  15  11  106.40    5.30
   3 -15 -11  105.20    5.20
   3  15 -10   20.20    2.90
   3  15 -10   19.50    4.70
  -3  15  10   21.00    2.60
   3 -15 -10   20.50    2.90
   3  15  -9   46.30    3.80
   3  15  -9   52.10    7.40
  -3  15   9   46.50    3.40
   3 -15  -9   47.00    3.30
   3  15  -8   46.70    3.80
   3  15  -8   46.10    3.70
  -3  15   8   56.30    3.80
  -3  15   8   56.70    3.50
   3  15  -7   48.20    3.50
   3  15  -7   45.40    3.30
  -3  15   7   48.40    3.60
  -3  15   7   48.20    3.50
   3  15  -6   52.60    3.50
   3  15  -6   51.40    3.30
  -3  15   6   50.30    3.60
  -3  15   6   52.30    3.50
   3  15  -5   68.00    4.20
   3  15  -5   66.80    3.90
  -3  15   5   69.30    4.00
  -3  15   5   73.70    3.90
   3  15  -4   10.50    3.00
   3  15  -4   11.60    2.40
  -3  15   4   14.20    2.90
  -3  15   4   11.60    2.30
   3  15  -3   96.00    5.30
   3  15  -3  102.50    5.30
  -3  15   3   93.30    5.20
  -3  15   3  101.40    5.00
   3  15  -2   65.00    4.30
   3  15  -2   62.30    4.10
  -3  15   2   66.00    4.30
  -3  15   2   70.50    3.90
   3  15  -1   46.70    3.50
   3  15  -1   50.60    3.70
  -3  15   1   46.90    3.60
  -3  15   1   46.50    3.20
   3  15   0   55.10    3.80
   3  15   0   51.80    3.70
  -3  15   0   52.30    3.90
  -3  15   0   52.00    3.50
   3  15   1  261.90   11.40
   3  15   1  271.20   10.60
  -3  15  -1  266.90   10.30
  -3  15  -1  260.90   11.00
   3  15   2   22.40    3.00
  -3  15  -2   23.10    2.70
  -3  15  -2   20.50    2.70
  -3 -15  -2   21.10    2.80
   3  15   3   72.00    4.10
  -3  15  -3   63.30    4.10
  -3  15  -3   64.50    3.80
  -3 -15  -3   72.50    4.00
   3  15   4   37.60    3.30
  -3  15  -4   36.40    3.20
  -3  15  -4   33.80    2.90
  -3 -15  -4   33.10    3.10
   3  15   5   88.50    4.70
  -3  15  -5   87.90    4.50
  -3 -15  -5   88.50    4.90
   3 -15   5   82.50    4.90
   3  15   6   60.30    4.30
  -3  15  -6   45.20    3.90
  -3 -15  -6   50.30    3.70
   3 -15   6   45.80    3.40
   3  15   7   80.00    4.60
  -3  15  -7   65.40    4.10
  -3 -15  -7   78.90    4.60
   3 -15   7   80.50    4.30
   3  15   8   10.60    2.80
  -3  15  -8  126.60   28.90
  -3 -15  -8   12.90    2.80
   3 -15   8   10.00    2.90
   3  15   9   71.10    4.50
  -3  15  -9   70.70    4.90
  -3 -15  -9   75.70    5.00
   3 -15   9   80.80    4.80
   3  15  10   19.80    3.30
  -3  15 -10   23.60    3.30
   3 -15  10   18.40    3.10
   3  15  11   33.90    3.40
  -3  15 -11   29.90    4.00
   3 -15  11   41.80    5.30
   3  15  12   15.80    2.80
  -3  15 -12   20.50    3.30
  -3 -15 -12   17.70    3.10
   3 -15  12   17.80    3.80
   3  15  13  108.10    6.30
  -3  15 -13  102.20    6.10
  -3 -15 -13  104.70    5.70
   3 -15  13   96.60    6.10
   3  15  14   -2.40    3.20
  -3  15 -14    3.30    4.30
  -3 -15 -14    1.90    2.90
  -3  15 -15   10.10    4.20
  -3 -15 -15    7.20    5.80
  -3  15 -16   20.20    4.10
  -3 -15 -16   29.00    5.80
  -3  15 -17   71.70    5.30
  -3 -15 -17   65.70    5.20
  -3  15 -18   15.90    4.00
  -3 -15 -18    7.80    3.20
  -3  15 -19   -0.10    3.80
  -3 -15 -19    5.30    3.50
  -3  15 -20    9.50    4.80
  -3 -15 -20    9.10    3.60
  -3  15 -21  160.90   26.30
  -3 -15 -21   64.90    5.60
  -3  15 -22    0.70    4.60
  -3 -15 -22    4.10    4.00
  -3  15 -23   11.40    4.50
  -3 -15 -23   17.90    4.90
  -3 -15 -24   19.30    4.40
  -3 -15 -25   20.80    5.50
   3 -17 -28    3.90    2.40
  -3 -17  27    6.70    5.40
   3 -17 -27    1.50    3.70
   3 -17 -26    0.80    3.30
   3  17 -25    1.00    4.20
   3 -17 -25    3.80    4.40
   3  17 -24   33.40    5.60
   3 -17 -24   31.40    3.90
   3  17 -23   -1.40    3.80
   3 -17 -23    2.40    3.60
   3  17 -22   -0.40    3.60
   3 -17 -22    7.20    3.20
   3  17 -21    8.00    5.10
   3 -17 -21   -5.20    3.30
   3  17 -20   46.30    4.70
   3 -17 -20   46.50    4.40
   3  17 -19   -3.40    4.50
   3 -17 -19   -1.90    2.60
   3  17 -18    4.40    3.70
  -3  17  18   -0.40    2.50
  -3 -17  18    2.70    3.30
   3 -17 -18    2.00    2.70
   3  17 -17    7.30    3.60
  -3  17  17    1.40    2.80
   3 -17 -17    1.70    2.80
   3  17 -16  145.50    7.60
  -3  17  16  126.70    6.90
   3 -17 -16  136.50    6.50
   3  17 -15   15.00    3.50
  -3  17  15   12.50    3.20
   3 -17 -15   13.90    2.90
   3  17 -14   16.00    3.90
  -3  17  14   13.60    3.40
   3 -17 -14   13.70    2.90
   3  17 -13    3.90    3.70
  -3  17  13    6.00    3.20
   3  17 -12   57.20    4.30
   3  17 -12   47.70    4.10
  -3  17  12   59.20    4.20
   3  17 -11   -0.40    3.10
   3  17 -11    6.50    4.30
  -3  17  11   -1.50    2.90
   3  17 -10  133.80    6.90
   3  17 -10  136.20    7.20
  -3  17  10  128.60    6.20
   3  17  -9   10.40    3.70
   3  17  -9    6.60    2.90
  -3  17   9    6.80    2.90
  -3  17   9    6.20    2.40
   3  17  -8   95.60    5.30
   3  17  -8   86.50    5.00
  -3  17   8   97.20    5.10
  -3  17   8   98.20    4.90
   3  17  -7    6.90    3.80
   3  17  -7    0.00    2.60
  -3  17   7    2.60    2.60
  -3  17   7    7.60    2.50
   3  17  -6   34.20    3.30
   3  17  -6   36.80    3.60
  -3  17   6   35.90    3.40
  -3  17   6   34.40    3.10
   3  17  -5   32.20    4.30
   3  17  -5   20.80    2.90
  -3  17   5   26.60    2.80
  -3  17   5   29.60    3.30
   3  17  -4  240.50   10.40
   3  17  -4  225.20   10.00
  -3  17   4  236.40   10.00
  -3  17   4  239.70    9.70
   3  17  -3   28.50    3.50
   3  17  -3   26.40    3.10
  -3  17   3   31.10    3.40
  -3  17   3   31.20    3.50
   3  17  -2  113.70    6.10
   3  17  -2  169.20   15.60
  -3  17   2  115.00    6.20
  -3  17   2  115.10    6.10
   3  17  -1   27.20    3.30
   3  17  -1   56.90   12.60
  -3  17   1   26.80    3.20
  -3  17   1   27.20    3.00
   3  17   0   90.10    5.30
   3  17   0   88.50    5.10
  -3  17   0   92.20    5.40
  -3  17   0   97.20    5.20
   3  17   1   23.40    3.40
   3  17   1   25.30    3.60
  -3  17  -1   24.40    3.30
  -3  17  -1   20.40    2.80
   3  17   2   34.40    3.80
   3  17   2   29.80    3.60
  -3  17  -2   35.40    3.40
  -3  17  -2   90.50   13.70
   3  17   3    5.40    3.10
   3  17   3    5.80    3.80
  -3  17  -3    5.50    3.30
  -3  17  -3   35.40   13.50
   3  17   4  179.70    8.30
  -3  17  -4  180.90    8.90
  -3  17  -4  174.70    7.90
  -3 -17  -4  182.50    8.40
   3  17   5   29.60    6.60
  -3  17  -5   11.10    2.70
  -3  17  -5   12.90    2.90
  -3 -17  -5   11.40    3.00
   3  17   6   16.70    3.20
  -3  17  -6   21.20    2.90
  -3  17  -6   24.60    3.20
  -3 -17  -6   20.70    3.30
   3  17   7    7.20    3.00
  -3  17  -7    0.50    2.80
  -3  17  -7    0.40    2.70
  -3 -17  -7    6.20    3.80
   3  17   8   60.90    4.50
  -3  17  -8   64.80    4.40
  -3 -17  -8   65.70    5.10
   3 -17   8   72.20    5.90
   3  17   9    9.70    4.40
  -3  17  -9    1.80    3.40
  -3 -17  -9    5.40    3.60
   3 -17   9    0.80    2.80
   3  17  10   34.70    4.50
  -3  17 -10   38.30    4.10
  -3 -17 -10   40.50    4.40
   3 -17  10   36.80    4.20
  -3  17 -11   -2.00    3.10
  -3  17 -12   46.40    4.50
  -3  17 -13   18.10    3.60
  -3 -17 -13   17.60    3.50
  -3  17 -14   15.60    3.70
  -3 -17 -14    8.70    3.10
  -3  17 -15   -0.20    3.90
  -3 -17 -15    2.20    3.50
  -3  17 -16   32.20    4.50
  -3 -17 -16   34.60    3.90
  -3  17 -17    8.30    4.00
  -3 -17 -17   10.20    3.80
  -3  17 -18   26.40    3.40
  -3 -17 -18   27.60    4.00
  -3 -17 -19    1.90    4.20
  -3  17 -20   24.90    5.30
  -3 -17 -20   18.00    3.90
  -3  17 -21   -1.10    5.00
  -3 -17 -21    0.50    4.10
  -3 -17 -22    8.00    4.10
  -3 -17 -23    3.90    4.00
   3 -19 -26   -1.80    3.10
   3 -19 -25   46.20    9.30
   3 -19 -24    4.70    3.20
   3 -19 -23    3.70    3.90
   3  19 -22    6.60    3.20
   3 -19 -22   14.80    3.90
   3  19 -21    3.50    4.00
   3 -19 -21   23.50    7.10
   3  19 -20   15.60    3.90
   3 -19 -20   22.00    3.50
   3  19 -19    5.90    3.80
   3 -19 -19    7.40    3.20
   3  19 -18   27.20    4.10
   3 -19 -18   22.40    4.70
   3  19 -17    6.30    3.70
   3 -19 -17    8.20    3.80
   3  19 -16   35.10    4.20
   3 -19 -16   27.00    3.50
   3  19 -15   12.40    4.30
   3 -19 -15   16.10    3.70
   3  19 -14   28.00    3.90
  -3  19  14   23.70    3.60
   3 -19 -14   39.80    3.60
   3  19 -13    5.70    3.60
  -3  19  13   -0.10    3.10
   3 -19 -13    4.00    3.60
   3  19 -12  112.60    6.30
  -3  19  12  116.20    6.60
  -3  19  12  104.10    5.80
   3  19 -11    5.20    4.40
  -3  19  11    6.10    3.00
  -3  19  11    1.10    2.50
   3  19 -10   22.30    3.50
  -3  19  10   15.10    3.60
   3  19  -9   -3.60    3.20
  -3  19   9    3.30    3.70
   3  19  -8   32.60    4.10
  -3  19   8   27.80    3.40
   3  19  -7    8.00    3.20
  -3  19   7    5.90    2.90
   3  19  -6   65.30    4.70
  -3  19   6   61.50    4.10
  -3  19   6   58.90    4.70
   3  19  -5    1.10    3.40
  -3  19   5    4.10    2.80
  -3  19   5   -1.30    2.50
   3  19  -4   94.70    6.40
   3  19  -4   82.30    5.60
  -3  19   4   93.80    4.80
  -3  19   4   91.10    5.50
   3  19  -3   16.70    3.80
   3  19  -3    7.00    3.20
  -3  19   3   21.90    3.10
  -3  19   3   20.40    3.30
   3  19  -2   36.00    3.90
   3  19  -2   31.60    4.40
  -3  19   2   41.80    3.80
  -3  19   2   36.10    3.40
   3  19  -1    6.20    3.70
   3  19  -1    3.60    3.10
  -3  19   1   11.00    3.70
  -3  19   1    9.00    4.60
   3  19   0   88.50    5.60
   3  19   0   78.00    4.90
  -3  19   0   77.80    5.00
  -3  19   0   83.40    5.30
   3  19   1   24.60    3.70
   3  19   1   16.10    4.30
  -3  19  -1   29.20    3.40
  -3  19  -1   18.30    3.10
   3  19   2   48.80    4.50
   3  19   2   34.50    3.90
  -3  19  -2   47.50    4.40
  -3  19  -2   44.20    4.40
   3  19   3   21.50    3.80
   3  19   3   16.80    3.30
  -3  19  -3   17.80    3.00
  -3  19  -3   18.50    3.00
   3  19   4   99.70   11.10
  -3  19  -4  103.50    5.60
  -3  19  -4   89.70    5.30
   3  19   5   20.10   10.40
  -3  19  -5    8.70    3.20
  -3  19  -5   10.50    3.10
  -3  19  -6   19.00    3.40
  -3 -19  -6   25.00    4.40
  -3  19  -7    5.70    3.20
  -3  19  -8   52.40    4.50
  -3 -19  -8   52.20    4.50
  -3  19  -9   34.70    4.20
  -3 -19  -9   29.00    4.50
  -3  19 -10   52.10    5.50
  -3 -19 -10   41.90    5.80
  -3  19 -11   -2.70    3.70
  -3 -19 -11    3.40    3.30
  -3  19 -12   45.40    5.00
  -3 -19 -12   51.40    4.70
  -3  19 -13    9.80    3.60
  -3 -19 -13   16.60    4.90
  -3  19 -14   18.70    4.30
  -3 -19 -14   19.60    3.80
  -3  19 -15    2.80    5.80
  -3 -19 -15    3.10    3.50
  -3  19 -16   22.40    4.00
  -3 -19 -16   23.60    4.10
  -3  19 -17    3.30    2.60
  -3 -19 -17   -0.60    3.90
  -3 -19 -18   27.30    5.60
  -3  19 -19   -4.80    4.30
  -3 -19 -19   -4.90    3.60
  -3 -19 -20   10.20    4.00
   3 -21 -23    5.10    2.40
   3 -21 -22   50.20    9.70
   3 -21 -21   10.10    4.90
   3 -21 -20    3.10    3.40
   3  21 -19   26.60    4.40
   3 -21 -19   28.90    5.20
   3  21 -18   18.60    4.70
   3 -21 -18   26.80    3.90
   3  21 -17   18.10    4.20
   3 -21 -17   14.90    4.10
   3  21 -16    1.70    4.50
   3 -21 -16   -4.00    3.90
   3  21 -15   18.60    4.40
  -3  21  15   24.90    4.70
   3  21 -14   29.00    4.40
  -3  21  14   29.00    6.20
   3  21 -13   28.10    5.00
  -3  21  13   22.90    4.10
   3  21 -12    3.50    4.00
  -3  21  12   -3.00    4.10
   3  21 -11   28.60    4.50
  -3  21  11   34.90    4.30
   3  21 -10   16.20    4.60
  -3  21  10   29.10    5.10
   3  21  -9   23.20    5.20
  -3  21   9   23.10    4.10
   3  21  -8    3.60    4.00
  -3  21   8   -0.70    3.30
   3  21  -7   47.10    4.80
   3  21  -6   42.70    4.20
   3  21  -5   37.90    4.50
   3  21  -4   13.70    3.70
   3  21  -3   42.20    4.50
  -3  21   3   39.40    4.00
   3  21  -2    8.60    3.60
  -3  21   2   13.80    3.70
   3  21  -1   16.90    3.70
  -3  21   1   25.80    4.10
   3  21   0   12.90    3.50
  -3  21   0   15.10    3.90
   3  21   1   66.50    5.20
  -3  21  -1  108.50   12.20
   3  21   2   18.80    5.30
  -3  21  -2   21.10    8.10
   3  21   3   30.70    4.90
  -3  21  -3   24.30    4.00
  -3  21  -4    1.60    3.30
  -3  21  -5   24.00    4.10
   3  21   6   11.80    3.90
  -3  21  -6   13.70    3.40
  -3  21  -7    5.60    3.50
  -3  21  -8   13.60    3.60
  -3 -21  -8    9.70    3.30
  -3  21  -9   61.90    5.50
  -3 -21  -9   70.20    4.90
  -3  21 -10   28.20    4.40
  -3 -21 -10   35.90    4.30
  -3  21 -11    6.90    4.00
  -3 -21 -11    3.50    3.40
  -3  21 -12    5.70    4.10
  -3 -21 -12   22.20   10.70
  -3  21 -13   33.10    5.50
  -3 -21 -13   36.40    5.40
  -3  21 -14    7.40    4.50
  -3 -21 -14    7.60    3.50
  -3  21 -15    8.20    4.70
  -3 -21 -15    2.90    3.70
  -3  21 -16   10.50    4.60
  -3 -21 -16   13.00    4.20
  -3 -21 -17   31.70    6.10
   3 -23 -20    2.60    2.30
  -3  23  19   52.30    9.20
  -3  23  18    1.70    4.30
  -3  23  17   10.30    4.00
  -3  23  16    6.20    4.20
  -3  23  15    3.00    4.60
   3  23 -14    5.90    5.00
  -3  23  14    0.50    4.40
   3  23 -13   45.60    5.20
  -3  23  13   36.50    4.60
   3  23 -12    1.60    3.30
  -3  23  12   -2.30    3.80
   3  23 -11   16.60    4.70
  -3  23  11   16.80    4.70
   3  23 -10    1.50    4.30
  -3  23  10    2.00    4.10
   3  23  -9   25.70    5.50
  -3  23   9   20.40    4.10
   3  23  -8    4.10    4.20
  -3  23   8    2.40    3.80
  -3  23   7   42.50    4.60
   3  23  -5   36.70    7.90
   3  23  -4    8.20    5.80
  -3  23   4    3.50    3.60
   3  23  -3   31.50    4.60
   3  23  -2   10.90    4.00
   3  23   0    9.90    3.90
  -3  23   0    6.20    3.70
  -3  23  -1    3.20    3.40
   3  23   2    9.50    4.10
  -3  23  -2    3.60    3.60
  -3  23  -5    7.10    3.60
  -3  23  -6    0.50    3.30
   3  23   7   23.60    5.50
  -3  23  -7   20.70    4.00
   3  23   8   15.60    4.40
  -3  23  -8   10.50    4.50
   3  23   9   23.40   10.50
   3  23  10   -2.00    5.00
  -3  23 -11   51.40    6.20
  -3 -23 -11   50.90    5.50
  -3 -23 -12   -2.10    3.60
  -3 -23 -13   15.20    5.80
  -3  25  13    4.00    4.50
  -3  25  12    4.10    3.90
  -3  25  11    0.50    3.40
  -3  25  10    6.90    4.30
  -3  25   9    3.70    3.80
  -3  25   8    2.00    4.70
  -3  25   7   -0.40    4.00
  -3  25   6   12.00    5.00
  -3  25   5    5.10    4.40
   3  25  -4   10.40    4.30
  -3  25   4    5.70    4.60
  -3  25   3   -0.10    3.50
  -3  25   2   21.00    4.60
   3  25  -1   18.20    5.10
  -3  25   1   16.00    4.90
  -3  25   0    6.00    4.20
  -3  25  -3    1.60    4.50
   4   0 -35   11.40    4.80
   4   0 -34   12.60    6.10
   4   0 -33    6.70    5.60
   4   0 -32   18.90    4.30
   4   0 -31   -1.00    4.60
   4   0 -30   22.20    3.60
   4   0 -29    4.00    2.80
   4   0 -29    0.70    3.30
   4   0 -28  115.00    6.00
   4   0 -28  107.20    8.00
  -4   0  28  100.90    6.20
   4   0 -27    0.70    2.70
  -4   0  27    3.80    4.00
   4   0 -26   24.20    3.30
   4   0 -26   44.80   11.10
  -4   0  26   19.10    3.30
   4   0 -25   -2.60    2.50
   4   0 -25    1.90    4.60
  -4   0  25    1.60    3.20
   4   0 -24   57.00    3.90
   4   0 -24   55.90    5.20
  -4   0  24   55.50    3.50
   4   0 -23   -5.60    2.80
   4   0 -23    0.50    3.70
  -4   0  23   -6.30    2.80
   4   0 -22  217.40    9.70
   4   0 -22  226.50   10.20
  -4   0  22  226.00    9.60
   4   0 -21    0.00    2.10
   4   0 -21   -2.10    2.40
  -4   0  21   -0.70    2.30
  -4   0  21   -2.40    2.20
   4   0 -20   49.00    3.10
   4   0 -20   45.70    4.00
  -4   0  20   47.00    3.20
  -4   0  20   46.50    3.80
   4   0 -19   -1.10    2.00
   4   0 -19   -2.90    2.60
  -4   0  19   -2.00    1.80
  -4   0  19    3.10    2.90
   4   0 -18  274.50   11.10
   4   0 -18  256.90   11.10
  -4   0  18  277.60   10.70
  -4   0  18  279.20   12.30
   4   0 -17   -1.30    2.20
  -4   0  17   -3.70    1.60
  -4   0  17   -0.80    2.80
   4   0 -16  148.50    7.10
  -4   0  16  143.00    6.40
  -4   0  16  139.70    6.90
   4   0 -15   -2.90    2.00
  -4   0  15   -1.60    1.40
  -4   0  15   -4.70    2.60
   4   0 -14  270.50   13.60
   4   0 -14  277.50   11.40
  -4   0  14  278.80   11.40
  -4   0  14  284.80   13.50
   4   0 -13   -0.10    1.60
   4   0 -13   -1.50    1.80
  -4   0  13   -1.20    1.10
  -4   0  13   -1.60    1.80
   4   0 -12  136.50    6.50
   4   0 -12  132.60    5.80
  -4   0  12  137.50    5.70
  -4   0  12  138.20    6.20
   4   0 -11    0.20    1.00
   4   0 -11   -1.40    2.00
   4   0 -11    0.80    1.80
  -4   0  11   -0.60    1.50
  -4   0  11   -0.50    1.70
   4   0 -10  222.70    9.10
   4   0 -10  243.10   11.20
   4   0 -10  244.60    9.90
  -4   0  10  228.20    8.70
  -4   0  10  226.70    9.80
   4   0  -9   -2.60    1.00
   4   0  -9   -1.90    1.50
   4   0  -9   -3.70    1.80
  -4   0   9   -0.60    0.90
  -4   0   9   -0.40    1.50
   4   0  -8   73.20    3.30
   4   0  -8   72.70    4.30
   4   0  -8   68.40    3.90
  -4   0   8   72.60    3.20
   4   0  -7   -0.90    1.10
   4   0  -7    0.60    1.30
  -4   0   7   -0.60    0.50
  -4   0   7   -0.50    1.40
   4   0  -6  824.50   28.30
   4   0  -6  849.60   30.60
  -4   0   6  836.10   27.90
  -4   0   6  827.50   29.80
   4   0  -5    4.80    1.00
   4   0  -5    3.30    3.30
   4   0  -5   11.30    3.60
  -4   0   5   -2.20    2.70
   4   0  -4  702.20   23.40
   4   0  -4  714.30   23.30
  -4   0   4  749.10   26.60
   4   0  -3    8.40    0.70
  -4   0   3    7.10    0.70
  -4   0   3    9.10    3.00
   4   0  -2  393.30   13.50
  -4   0   2  383.60   13.10
  -4   0   2  371.70   14.40
   4   0  -1    4.60    1.10
  -4   0   1    9.20    1.40
  -4   0   1    7.60    2.30
   4   0   0  535.30   18.80
   4   0   0  549.20   21.20
  -4   0   0  540.70   18.80
  -4   0   0  525.30   19.80
   4   0   1   -2.40    1.20
  -4   0  -1   -2.10    0.80
  -4   0  -1   -2.10    1.20
   4   0   2  742.10   25.60
  -4   0  -2  723.70   25.60
  -4   0  -2  728.40   25.00
   4   0   3   -0.60    0.90
   4   0   3   -0.30    0.70
  -4   0  -3   -2.40    1.00
   4   0   4   84.90    4.30
   4   0   4   77.40    3.50
   4   0   5   -2.00    1.10
   4   0   5   -1.00    0.60
   4   0   6 1042.30   36.30
   4   0   7    0.10    1.30
   4   0   8    4.50    1.50
   4   0   9    2.30    1.80
   4   0  10  375.80   13.90
   4   0  11   -2.00    1.80
  -4   0 -11   -3.50    1.90
   4   0  12  157.50    7.00
  -4   0 -12  152.40    7.70
   4   0  13    1.50    2.10
  -4   0 -13   -1.30    1.90
   4   0  14  257.80    9.60
  -4   0 -14  242.20   11.20
   4   0  15   -3.00    2.40
  -4   0 -15   -0.90    2.50
   4   0  16   86.50    4.40
  -4   0 -16   80.30    4.80
   4   0  17   -4.20    2.40
  -4   0 -17   -0.30    2.30
   4   0  18  250.70    9.70
  -4   0 -18  245.50   10.50
   4   0  19    3.30    3.20
  -4   0 -19    2.00    2.70
   4   0  20   30.80    3.00
  -4   0 -20   32.00    3.40
   4   0  21   -2.80    2.90
  -4   0 -21   -0.40    2.90
   4   0  22  130.50    7.50
  -4   0 -22  152.80    7.70
  -4   0 -23   -2.40    3.40
  -4   0 -24   68.40    4.90
  -4   0 -25   16.50    6.40
  -4   0 -26   53.50    4.90
  -4   0 -27    3.90    5.30
  -4   0 -28    6.50    4.50
  -4   0 -29   -3.00    4.00
   4   2 -35   17.00    4.00
   4  -2 -35   30.10    6.60
   4   2 -34   15.10    3.80
   4  -2 -34    6.40    6.10
   4   2 -33    8.10    3.40
   4  -2 -33   12.30    5.90
   4   2 -32   25.40    3.80
   4  -2 -32   16.50    4.40
   4   2 -31   33.00    4.30
   4  -2 -31   35.00    4.70
   4   2 -30   23.50    4.80
   4  -2 -30   31.80    5.00
   4  -2 -30   29.70    5.60
   4   2 -29    8.60    3.60
   4  -2 -29    2.30    3.10
   4  -2 -29    1.40    3.30
   4   2 -28   21.80    3.70
  -4   2  28   20.70    3.80
  -4  -2  28   12.20    3.40
   4  -2 -28   19.60    3.10
   4  -2 -28   25.50    4.80
   4   2 -27   72.20    5.30
  -4   2  27   73.70    4.90
  -4  -2  27   63.60    4.60
   4  -2 -27   74.70    5.10
   4  -2 -27   83.00    7.10
   4   2 -26   56.20    4.10
  -4   2  26   54.70    4.20
  -4  -2  26   48.20    4.30
  -4  -2  26   45.80    4.30
   4  -2 -26   46.20    3.70
   4  -2 -26   51.40    5.60
   4   2 -25    7.70    2.90
   4   2 -25    7.40    2.90
  -4   2  25    2.50    2.50
  -4  -2  25   -0.90    2.70
  -4  -2  25    9.80    3.50
   4  -2 -25    5.40    3.20
   4  -2 -25    1.40    3.40
   4   2 -24   57.30    4.10
   4   2 -24   60.40    4.10
  -4   2  24   55.70    3.80
  -4  -2  24   56.30    4.20
  -4  -2  24   63.80    6.30
   4  -2 -24   55.10    4.10
   4  -2 -24   59.40    5.00
   4   2 -23   64.30    3.90
   4   2 -23   58.80    4.90
  -4   2  23   57.00    4.10
  -4  -2  23   65.10    4.30
  -4  -2  23   59.80    4.70
   4  -2 -23   58.20    3.70
   4  -2 -23   57.50    4.60
   4   2 -22   18.20    2.80
   4   2 -22   37.30    8.30
  -4   2  22   13.90    2.60
  -4  -2  22   14.40    2.60
  -4  -2  22   19.90    3.60
   4  -2 -22   15.10    2.60
   4  -2 -22   17.70    3.60
   4   2 -21    4.40    3.80
   4   2 -21    6.80    3.00
  -4   2  21    0.50    2.70
  -4  -2  21    4.10    2.20
  -4  -2  21    2.20    2.40
   4  -2 -21    5.40    2.50
   4   2 -20   93.60    4.70
   4   2 -20   88.70    4.90
  -4   2  20   95.20    4.90
  -4  -2  20   88.80    4.80
  -4  -2  20   93.10    5.90
   4  -2 -20   86.60    4.40
   4  -2 -20   90.60    6.10
   4   2 -19   73.60    4.00
   4   2 -19   74.40    4.20
  -4   2  19   71.60    3.70
  -4  -2  19   71.30    3.70
  -4  -2  19   69.30    4.70
   4  -2 -19   64.40    3.60
   4  -2 -19   66.00    5.20
   4   2 -18   64.30    3.50
   4   2 -18   65.00    4.10
  -4   2  18   66.00    3.60
  -4  -2  18   68.60    3.60
  -4  -2  18   71.60    4.90
   4  -2 -18   66.50    3.60
   4  -2 -18   70.50    4.50
   4   2 -17   27.70    2.50
   4   2 -17   25.90    2.60
  -4   2  17   31.70    2.30
  -4  -2  17   28.50    2.40
  -4  -2  17   27.70    2.90
   4  -2 -17   24.30    2.50
   4  -2 -17   29.50    2.80
   4   2 -16   45.20    2.90
   4   2 -16   39.60    2.90
  -4   2  16   42.40    2.70
  -4  -2  16   43.00    3.90
  -4  -2  16   42.40    3.70
   4  -2 -16   43.70    3.40
   4   2 -15  110.70    4.90
   4   2 -15  105.60    5.80
  -4   2  15  110.50    4.80
  -4  -2  15  113.60    5.20
  -4  -2  15  105.90    6.70
   4  -2 -15  111.80    5.70
   4   2 -14   93.50    4.50
   4   2 -14   92.80    5.00
  -4   2  14   95.80    4.30
  -4  -2  14   98.00    4.60
  -4  -2  14   90.60    5.10
   4  -2 -14   89.10    5.50
   4   2 -13   25.80    2.00
   4   2 -13   26.90    2.30
  -4   2  13   22.40    1.90
  -4  -2  13   24.30    1.90
   4  -2 -13   30.00    2.70
   4   2 -12   89.50    4.00
   4   2 -12   86.00    4.50
  -4   2  12   87.10    4.20
  -4  -2  12   87.30    4.00
   4  -2 -12   85.20    5.20
   4   2 -11  187.10    7.40
  -4   2  11  190.50    7.60
  -4  -2  11  186.60    7.50
  -4  -2  11  186.30    8.10
   4  -2 -11  183.70    7.80
   4   2 -10  116.20    5.60
  -4   2  10  115.90    5.00
  -4  -2  10  117.00    5.00
  -4  -2  10  116.80    6.70
  -4  -2  10  107.70    5.40
   4  -2 -10  116.00    6.20
   4   2  -9    4.90    0.90
  -4   2   9    6.10    1.00
  -4  -2   9    6.70    1.00
  -4  -2   9    3.10    1.30
   4  -2  -9    5.90    0.80
   4  -2  -9    5.20    1.50
   4   2  -8   60.20    2.90
  -4   2   8   61.80    2.90
  -4  -2   8   57.80    2.90
  -4  -2   8   59.90    3.50
   4  -2  -8   56.90    2.60
   4  -2  -8   64.10    4.10
   4   2  -7  179.10    7.10
  -4   2   7  192.30    7.10
  -4  -2   7  180.30    7.20
  -4  -2   7  185.80    8.90
  -4  -2   7  175.10    7.20
   4  -2  -7  173.50    6.60
   4  -2  -7  186.80    8.90
   4   2  -6  507.10   17.70
  -4   2   6  507.00   17.50
  -4  -2   6  508.50   17.90
  -4  -2   6  519.50   21.30
   4  -2  -6  497.20   16.80
   4  -2  -6  529.60   20.60
   4   2  -5  640.40   22.30
  -4  -2   5  637.10   22.90
  -4  -2   5  710.90   27.00
   4  -2  -5  602.70   20.60
   4  -2  -5  710.40   25.60
   4  -2  -5  643.80   25.10
   4   2  -4   23.90    2.20
   4   2  -4   19.00    1.50
  -4  -2   4    9.70    2.80
   4  -2  -4   16.10    2.20
   4  -2  -4   21.30    3.40
   4   2  -3  443.40   15.70
  -4   2   3  448.60   15.10
  -4  -2   3  440.60   15.40
  -4  -2   3  519.40   20.60
   4  -2  -3  428.70   14.90
   4  -2  -3  478.30   17.00
   4   2  -2  132.10    5.40
  -4   2   2  137.50    5.40
  -4   2   2  141.90    6.10
  -4  -2   2  137.10    5.30
   4  -2  -2  134.60    5.10
   4  -2  -2  148.80    6.30
   4   2  -1   65.50    3.80
  -4   2   1   66.30    3.60
  -4   2   1   62.90    3.20
  -4  -2   1   86.00    5.10
   4  -2  -1   58.20    2.90
   4  -2  -1   59.00    3.40
   4   2   0 2661.30   85.10
  -4   2   0 2529.50   83.30
  -4   2   0 2592.50   88.10
  -4  -2   0 2623.20   84.10
   4  -2   0 2599.60   85.20
   4   2   1  899.30   29.00
  -4   2  -1  834.70   29.50
  -4   2  -1  861.20   30.70
  -4  -2  -1  860.60   29.60
   4  -2   1  846.50   29.80
   4   2   2    0.60    0.90
  -4   2  -2   -0.20    1.00
  -4  -2  -2    0.30    1.00
   4  -2   2    1.30    0.90
   4   2   3  183.70    7.00
  -4  -2  -3  172.80    6.60
   4  -2   3  169.80    6.90
   4   2   4  168.50    6.60
  -4   2  -4  158.50    7.00
  -4  -2  -4  168.80    6.50
   4  -2   4  171.20    6.90
   4   2   5   39.90    2.40
  -4  -2  -5   41.20    2.30
   4  -2   5   41.50    2.40
   4   2   6  415.10   16.10
  -4  -2  -6  406.40   14.90
  -4  -2  -6  423.80   14.80
   4  -2   6  412.20   14.80
   4   2   7  182.80    7.50
  -4  -2  -7  194.70    7.90
  -4  -2  -7  199.90    6.70
   4  -2   7  187.60    7.50
   4   2   8   86.20    4.10
  -4   2  -8   79.40    3.70
   4  -2   8   84.10    4.20
   4   2   9  103.40    4.70
   4  -2   9  106.50    4.50
   4   2  10  147.00    6.40
  -4  -2 -10  133.70    6.20
   4  -2  10  138.80    5.90
   4   2  11   98.70    4.70
   4  -2  11  101.60    5.10
   4   2  12  143.30    6.80
   4  -2  12  136.60    5.80
   4  -2  12  131.10    5.40
   4   2  13  128.80    5.90
  -4  -2 -13  129.30    5.70
   4  -2  13  127.60    5.90
   4  -2  13  124.80    4.80
   4   2  14   34.40    3.20
  -4   2 -14   33.50    2.90
  -4  -2 -14   34.70    2.80
   4  -2  14   33.50    2.90
   4  -2  14   33.30    1.50
   4   2  15   71.20    4.80
  -4   2 -15   61.60    4.00
  -4  -2 -15   56.10    3.90
   4  -2  15   73.90    4.70
   4   2  16   79.80    4.60
  -4   2 -16   82.00    4.90
  -4  -2 -16   80.50    4.60
   4  -2  16   92.10    4.90
   4   2  17   18.50    2.90
  -4   2 -17   23.10    3.10
  -4  -2 -17   22.20    2.80
   4  -2  17   23.80    3.00
   4   2  18   83.90    4.50
  -4   2 -18   78.40    5.10
  -4  -2 -18   74.60    5.10
   4  -2  18   75.50    4.90
   4   2  19   68.30    4.70
  -4   2 -19   66.20    4.50
  -4  -2 -19   65.40    4.30
   4  -2  19   60.10    4.00
   4   2  20   29.60    3.80
  -4   2 -20   29.90    3.80
  -4  -2 -20   29.30    3.50
   4  -2  20   26.90    3.20
   4   2  21   16.90    3.30
  -4   2 -21   17.70    3.20
  -4  -2 -21   18.60    3.20
   4  -2  21   20.50    3.00
   4   2  22   31.70    4.20
  -4   2 -22   37.80    4.30
  -4   2 -22   45.30    3.40
  -4  -2 -22   42.90    4.70
  -4   2 -23   99.50    6.10
  -4   2 -23   99.00    5.70
  -4  -2 -23  101.90    6.80
  -4   2 -24   22.30    4.10
  -4  -2 -24   26.80    4.20
  -4   2 -25   11.80    3.40
  -4  -2 -25    4.10    6.60
  -4   2 -26   27.80    4.60
  -4  -2 -26   36.50    5.40
  -4   2 -27   26.90    4.60
  -4  -2 -27   45.10    5.80
  -4   2 -28   18.60    4.10
  -4  -2 -28   17.70    4.10
  -4   2 -29    8.70    4.60
  -4  -2 -29    2.20    4.30
   4   4 -35   13.70    4.40
   4  -4 -35   11.10    3.80
   4   4 -34    6.40    3.80
   4  -4 -34    7.00    4.20
   4   4 -33   27.90    5.10
   4  -4 -33   23.80    4.30
   4   4 -32   18.10    8.50
   4  -4 -32   23.70    8.30
   4   4 -31   28.80    4.80
   4  -4 -31   26.10    4.80
   4   4 -30   -3.10    3.40
   4  -4 -30   -0.70    2.90
   4  -4 -30    6.20    5.60
   4   4 -29   40.50    4.60
  -4  -4  29   44.80    4.50
   4  -4 -29   40.60    4.70
   4  -4 -29   47.50    6.00
   4   4 -28   26.70    7.70
  -4   4  28    4.90    3.90
  -4  -4  28    9.80    3.60
   4  -4 -28   12.50    2.90
   4  -4 -28   12.50    4.30
   4   4 -27   66.60    5.30
  -4   4  27   58.20    4.30
  -4  -4  27   63.10    4.40
  -4  -4  27   60.60    5.00
   4  -4 -27   59.60    4.30
   4  -4 -27   58.70    6.50
   4   4 -26    1.70    3.50
  -4   4  26    3.50    3.00
  -4  -4  26   -0.80    3.40
  -4  -4  26   -1.80    3.30
   4  -4 -26   -0.60    2.70
   4   4 -25   64.90    4.40
  -4   4  25   53.60    4.40
  -4  -4  25   54.90    4.80
  -4  -4  25   76.80    7.20
   4  -4 -25   58.70    4.10
   4   4 -24   13.60    3.50
  -4   4  24   13.90    2.60
  -4  -4  24   12.10    3.00
  -4  -4  24   11.30    3.40
   4  -4 -24   15.70    3.70
   4  -4 -24   10.90    2.70
   4   4 -23   64.20    4.20
  -4   4  23   60.30    3.70
  -4  -4  23   65.10    4.20
  -4  -4  23   64.20    4.90
   4  -4 -23   65.60    4.20
   4  -4 -23   50.20    4.90
   4   4 -22    0.70    2.40
  -4   4  22    3.40    2.50
  -4  -4  22    3.30    2.90
  -4  -4  22   -0.50    3.10
   4  -4 -22    0.50    2.50
   4  -4 -22    1.90    2.70
   4   4 -21   81.70    5.10
  -4   4  21   74.50    4.20
  -4  -4  21   81.10    4.50
  -4  -4  21   86.60    5.50
   4  -4 -21   77.10    4.20
   4  -4 -21   84.30    5.20
   4   4 -20   12.60    2.60
  -4   4  20    6.40    1.90
  -4  -4  20    6.30    2.50
  -4  -4  20    5.30    2.50
   4  -4 -20    7.30    2.10
   4  -4 -20   11.80    4.30
   4   4 -19  175.90    7.50
  -4   4  19  182.40    7.40
  -4  -4  19  170.20    7.60
  -4  -4  19  175.70    8.80
   4  -4 -19  167.10    7.50
   4  -4 -19  185.30    9.20
   4   4 -18   -0.90    1.90
  -4   4  18   -0.50    2.00
  -4  -4  18   -1.60    1.70
  -4  -4  18   -1.80    2.80
   4  -4 -18   -1.50    1.90
   4  -4 -18    1.30    2.10
   4   4 -17   82.00    4.20
  -4   4  17   80.70    4.20
  -4  -4  17   90.80    4.40
  -4  -4  17   90.20    5.00
   4  -4 -17   86.60    4.00
   4  -4 -17   85.90    5.30
   4   4 -16   -2.70    1.60
  -4   4  16   -0.30    1.40
  -4  -4  16   -2.60    1.60
  -4  -4  16   -1.10    2.30
   4  -4 -16    2.40    1.70
   4  -4 -16   -0.30    1.80
   4   4 -15  196.80    8.30
  -4   4  15  206.80    8.20
  -4  -4  15  206.20    8.60
  -4  -4  15  212.20   10.80
   4  -4 -15  196.30    7.70
   4  -4 -15  200.30    9.70
   4   4 -14   -3.20    1.50
  -4   4  14   -1.90    1.20
  -4  -4  14   -0.80    1.90
  -4  -4  14   -2.60    2.10
   4  -4 -14   -4.50    1.30
   4  -4 -14   -2.10    2.10
   4   4 -13  189.10    8.10
  -4   4  13  169.40    6.80
  -4  -4  13  165.80    7.20
  -4  -4  13  177.30    8.20
  -4  -4  13  172.70    7.50
   4  -4 -13  165.60    6.60
   4  -4 -13  174.00    7.80
   4   4 -12   83.10    4.10
  -4   4  12   85.10    3.70
  -4  -4  12   88.50    4.10
  -4  -4  12   91.50    7.70
  -4  -4  12   85.70    4.20
   4  -4 -12   85.80    3.80
   4  -4 -12   83.70    5.00
   4   4 -11  199.80    8.10
  -4   4  11  200.90    8.00
  -4  -4  11  222.20   11.20
  -4  -4  11  207.10    9.80
   4  -4 -11  205.50    8.10
   4  -4 -11  205.80    9.50
   4   4 -10  109.40    4.80
  -4   4  10  109.70    4.40
  -4  -4  10  111.90    4.80
  -4  -4  10  111.80    4.90
   4  -4 -10  108.90    4.50
   4  -4 -10  111.60    6.10
   4   4  -9  316.20   12.10
  -4   4   9  313.30   11.50
  -4  -4   9  327.10   11.50
   4  -4  -9  316.10   11.50
   4   4  -8  123.50    5.40
  -4   4   8  125.90    4.70
  -4  -4   8  119.50    5.20
   4  -4  -8  116.40    4.70
   4   4  -7   78.60    3.70
  -4   4   7   78.30    3.10
  -4  -4   7   79.60    3.50
   4  -4  -7   76.20    3.30
   4   4  -6    0.40    2.10
  -4   4   6   -1.70    0.60
  -4  -4   6   -1.20    1.00
   4  -4  -6   -0.60    0.90
   4   4  -5  802.70   27.60
   4   4  -5  836.50   28.20
  -4   4   5  835.50   27.80
   4  -4  -5  793.10   27.40
   4   4  -4  171.30    6.30
   4   4  -4  172.10    6.90
  -4   4   4  164.30    6.30
  -4   4   4  165.30    6.50
   4   4  -3   50.20    2.60
  -4   4   3   44.20    2.30
  -4   4   3   49.00    2.30
  -4  -4   3   51.10    2.60
   4   4  -2  478.60   16.10
  -4   4   2  427.50   16.20
  -4  -4   2  457.20   15.80
   4  -4  -2  438.20   15.90
   4   4  -1  563.90   19.00
  -4   4   1  552.20   19.70
  -4  -4   1  526.50   18.80
   4  -4  -1  549.80   19.00
   4   4   0   83.20    3.80
  -4   4   0   77.70    3.40
  -4  -4   0   82.10    3.70
   4  -4   0   79.20    3.70
   4   4   1  267.90   10.10
  -4   4  -1  267.30   10.40
  -4  -4  -1  280.20   10.40
   4  -4   1  271.70   10.50
   4  -4   1  271.60   10.30
   4   4   2   31.10    2.00
  -4   4  -2   30.00    1.80
  -4  -4  -2   29.90    2.00
   4  -4   2   27.30    1.70
   4  -4   2   28.40    1.60
   4   4   3  245.20    9.10
  -4   4  -3  239.80    9.00
  -4  -4  -3  244.50    8.80
   4  -4   3  245.90    9.20
   4   4   4  126.80    5.40
  -4   4  -4  116.30    4.80
  -4  -4  -4  114.20    4.70
   4  -4   4  118.20    4.90
   4   4   5  215.00    8.40
  -4   4  -5  207.00    8.10
  -4  -4  -5  215.00    7.90
   4  -4   5  220.10    8.20
   4   4   6    7.30    1.50
  -4   4  -6    8.40    1.40
  -4  -4  -6    9.70    2.00
   4  -4   6    9.30    1.50
   4   4   7  772.50   26.20
  -4   4  -7  734.50   26.10
  -4  -4  -7  744.10   25.70
   4  -4   7  780.70   27.30
   4   4   8   19.60    1.90
  -4   4  -8   18.90    2.00
  -4  -4  -8   21.00    1.90
   4  -4   8   21.40    2.20
   4   4   9   64.80    3.50
  -4  -4  -9   60.90    3.30
   4  -4   9   68.70    3.50
   4   4  10   -1.30    1.60
  -4   4 -10   -0.80    1.30
  -4  -4 -10   -1.80    1.50
   4  -4  10    1.10    1.90
   4   4  11  256.70    9.60
  -4   4 -11  243.00   10.90
  -4  -4 -11  255.60   10.00
   4  -4  11  252.50   10.60
   4   4  12    7.20    1.90
  -4  -4 -12    8.50    2.20
   4  -4  12    7.70    2.20
   4   4  13  250.10   10.00
  -4  -4 -13  237.00    9.60
   4  -4  13  234.90   10.50
   4   4  14   91.20    4.70
  -4   4 -14   87.00    4.90
  -4   4 -14   89.10    3.50
  -4  -4 -14   90.90    4.50
   4  -4  14   84.70    4.50
   4   4  15  228.60   10.20
  -4   4 -15  225.50   10.10
  -4   4 -15  220.70    8.00
  -4  -4 -15  224.90    9.60
   4  -4  15  214.30    8.80
   4   4  16   52.80    4.30
  -4   4 -16   61.90    4.10
  -4   4 -16   60.80    2.70
  -4  -4 -16   51.30    3.50
   4  -4  16   59.20    4.20
   4  -4  16   57.30    3.30
   4   4  17   10.80    2.60
  -4   4 -17   10.50    2.80
  -4  -4 -17   10.20    2.90
   4  -4  17    9.50    2.70
   4  -4  17    8.60    1.60
   4   4  18   35.30    3.80
  -4   4 -18   34.40    3.60
  -4  -4 -18   35.20    3.40
   4  -4  18   28.20    3.20
   4  -4  18   32.40    2.20
   4   4  19  151.40    6.80
  -4   4 -19  153.70    7.60
  -4  -4 -19  153.90    8.00
   4  -4  19  153.20    7.70
   4  -4  19  156.40    6.20
   4   4  20    5.70    3.20
  -4   4 -20    3.90    3.30
  -4  -4 -20    8.10    3.00
   4  -4  20    9.60    3.40
   4   4  21   68.40    5.10
  -4   4 -21   73.20    4.70
  -4  -4 -21   72.90    5.70
   4  -4  21   55.90    5.00
  -4   4 -22    1.80    3.70
  -4  -4 -22    6.70    4.10
  -4   4 -23   56.40    5.00
  -4  -4 -23   50.80    4.80
  -4   4 -24    4.40    3.40
  -4  -4 -24   16.00    3.90
  -4   4 -25   34.40    4.60
  -4  -4 -25   30.30    4.40
  -4   4 -26   -3.30    3.50
  -4  -4 -26   -0.90    3.60
  -4   4 -27   40.40    4.80
  -4  -4 -27   45.00    5.80
  -4   4 -28   10.00    4.30
  -4  -4 -28   -3.30    3.50
  -4   4 -29   37.00    4.90
  -4  -4 -29   27.00    5.20
   4  -6 -35    0.90    3.10
   4   6 -34    1.50    3.70
   4  -6 -34    5.00    3.50
   4   6 -33   29.30    4.70
   4  -6 -33   18.30    4.10
   4   6 -32   12.30    4.70
   4  -6 -32    9.20    4.30
   4   6 -31    9.30    3.70
   4  -6 -31    0.70    3.70
   4   6 -30   -1.80    4.30
   4  -6 -30    6.30    4.40
   4   6 -29   46.70    4.70
  -4  -6  29   47.90    5.00
   4  -6 -29   48.40    4.00
   4   6 -28   14.20    3.50
  -4   6  28    4.90    3.50
  -4  -6  28   17.00    3.80
   4  -6 -28   19.50    3.20
   4   6 -27    9.70    3.30
  -4   6  27   14.30    3.00
  -4  -6  27   14.10    3.90
   4  -6 -27   17.50    3.80
   4  -6 -27   16.30    3.40
   4   6 -26   29.40    4.30
  -4   6  26   24.30    3.30
  -4  -6  26   12.60    3.60
  -4  -6  26   22.30    4.20
   4  -6 -26   25.90    3.80
   4  -6 -26   21.70    3.50
   4   6 -25   87.20    5.60
  -4   6  25   78.30    5.10
  -4  -6  25   76.80    5.40
  -4  -6  25   80.30    5.70
   4  -6 -25   83.00    4.80
   4  -6 -25   74.20    5.20
   4   6 -24    0.80    2.70
  -4   6  24    3.00    2.30
  -4  -6  24   -3.10    3.00
  -4  -6  24    6.50    5.50
   4  -6 -24    0.60    2.30
   4  -6 -24   30.60    9.50
   4   6 -23   40.60    3.50
  -4   6  23   36.70    3.20
  -4  -6  23   38.90    3.70
  -4  -6  23   42.40    4.70
   4  -6 -23   40.40    3.70
   4  -6 -23   42.60    5.60
   4   6 -22   22.60    3.50
  -4   6  22   21.40    2.60
  -4  -6  22   20.20    3.50
  -4  -6  22   16.60    3.10
   4  -6 -22   22.40    2.90
   4  -6 -22   23.60    3.50
   4   6 -21  134.40    6.30
  -4   6  21  131.80    6.70
  -4  -6  21  137.10    6.80
  -4  -6  21  137.00    7.10
   4  -6 -21  142.20    6.70
   4  -6 -21  139.90   10.70
   4   6 -20   20.00    2.70
  -4   6  20   22.50    4.80
  -4  -6  20   24.80    3.00
  -4  -6  20   20.90    3.00
   4  -6 -20   22.60    2.40
   4  -6 -20   25.20    3.30
   4   6 -19   43.60    3.10
  -4   6  19   40.20    3.00
  -4  -6  19   45.30    3.20
  -4  -6  19   43.70    6.40
   4  -6 -19   35.70    4.90
   4  -6 -19   41.10    3.60
   4   6 -18   23.50    2.90
  -4   6  18   21.90    2.10
  -4  -6  18   42.60    5.80
  -4  -6  18   19.00    3.50
   4  -6 -18   21.10    2.40
   4  -6 -18   23.80    2.90
   4   6 -17  122.60    5.60
  -4   6  17  129.00    5.30
  -4  -6  17  120.40    5.20
  -4  -6  17  131.10    8.60
   4  -6 -17  123.10    6.80
   4   6 -16   11.40    2.00
  -4   6  16   11.20    1.90
  -4  -6  16   11.00    1.90
  -4  -6  16   13.40    2.80
   4  -6 -16   11.50    2.40
   4   6 -15   78.50    3.90
  -4   6  15   75.90    3.50
  -4  -6  15   79.40    3.70
  -4  -6  15   77.30    4.20
   4  -6 -15   76.90    3.70
   4  -6 -15   73.40    4.20
   4   6 -14   78.40    4.20
  -4   6  14   80.40    3.70
  -4  -6  14   84.60    5.30
  -4  -6  14   79.50    4.60
   4  -6 -14   76.60    3.70
   4  -6 -14   79.70    4.30
   4   6 -13  281.70   10.50
  -4   6  13  273.60   10.30
  -4  -6  13  275.20   10.60
  -4  -6  13  288.70   11.70
   4  -6 -13  280.40   10.40
   4  -6 -13  292.20   13.80
   4   6 -12    6.60    1.60
  -4   6  12    9.30    1.50
  -4  -6  12    6.20    1.40
  -4  -6  12    4.60    2.10
   4  -6 -12    6.30    1.40
   4   6 -11   89.50    4.10
  -4   6  11   85.90    3.80
  -4  -6  11   89.30    4.20
   4  -6 -11   86.50    4.10
   4   6 -10    0.40    1.60
  -4   6  10   -0.90    1.20
  -4  -6  10   -1.30    1.60
   4  -6 -10    2.10    1.10
   4   6  -9  173.00    6.80
  -4   6   9  170.00    6.30
  -4  -6   9  168.70    7.20
   4  -6  -9  166.90    6.70
   4   6  -8  111.00    4.60
  -4   6   8  107.10    4.70
  -4  -6   8  109.40    4.90
   4  -6  -8  102.90    4.40
   4   6  -7  255.80   10.10
  -4   6   7  258.40    9.90
  -4  -6   7  260.00    9.90
   4  -6  -7  257.10    9.90
   4   6  -6   38.40    2.30
   4   6  -6   40.90    2.70
  -4   6   6   35.20    2.10
   4  -6  -6   37.10    2.10
   4   6  -5  201.10    7.90
   4   6  -5  220.00    8.00
  -4   6   5  210.20    8.30
   4  -6  -5  206.70    8.00
   4   6  -4   86.90    3.90
   4   6  -4   91.00    4.10
  -4   6   4   84.00    3.70
  -4   6   4   88.20    4.00
   4   6  -3  147.60    5.80
  -4   6   3  134.20    5.50
  -4   6   3  141.90    5.80
  -4  -6   3  140.00    5.90
   4   6  -2  256.10    9.80
  -4   6   2  244.20    9.90
  -4  -6   2  248.80    9.30
   4  -6  -2  250.20    9.50
   4   6  -1   66.20    3.20
  -4   6   1   63.00    3.20
  -4  -6   1   63.10    3.10
   4  -6  -1   61.80    3.10
   4   6   0  100.00    4.40
  -4   6   0   97.10    4.80
  -4  -6   0  103.40    4.70
   4  -6   0   96.00    4.30
   4   6   1  303.70   11.90
  -4   6  -1  292.00   10.80
  -4  -6  -1  282.00   11.20
   4  -6   1  292.70   10.70
   4   6   2  285.90   10.80
  -4   6  -2  281.30   11.50
  -4  -6  -2  280.50   10.30
   4  -6   2  280.70   11.20
   4   6   3  338.00   12.70
  -4   6  -3  333.50   13.30
  -4  -6  -3  342.90   13.50
   4  -6   3  345.60   12.70
   4   6   4   23.00    2.00
  -4   6  -4   19.30    1.70
  -4  -6  -4   24.10    2.50
   4  -6   4   24.10    1.70
   4  -6   4   21.30    1.40
   4   6   5  177.00    7.30
  -4   6  -5  176.20    8.20
  -4  -6  -5  172.50    7.00
   4  -6   5  180.60    7.00
   4  -6   5  173.20    6.80
   4   6   6   -0.40    1.40
  -4   6  -6   -1.00    1.40
  -4  -6  -6    1.00    1.40
   4  -6   6    1.90    1.50
   4   6   7  219.60    8.40
  -4   6  -7  202.00    8.20
  -4  -6  -7  211.90    7.90
   4  -6   7  213.80    8.30
   4   6   8  366.30   13.60
  -4   6  -8  341.90   13.00
  -4  -6  -8  349.60   12.50
   4  -6   8  359.40   14.10
   4   6   9  176.30    7.10
  -4   6  -9  165.30    6.90
  -4  -6  -9  166.40    6.80
   4  -6   9  173.00    7.20
   4   6  10   79.40    3.90
  -4   6 -10   69.40    3.60
  -4  -6 -10   67.60    3.50
   4  -6  10   76.50    4.10
   4   6  11  129.80    6.00
  -4   6 -11  116.90    5.40
   4  -6  11  125.20    5.30
   4   6  12    5.50    1.90
   4  -6  12    5.40    2.00
   4   6  13  240.10    9.90
  -4  -6 -13  221.40    9.00
   4  -6  13  232.00    9.30
   4   6  14   83.10    4.50
  -4   6 -14   80.70    4.90
  -4  -6 -14   77.00    4.20
   4  -6  14   83.30    4.90
   4   6  15   32.50    3.00
  -4   6 -15   35.80    3.30
  -4  -6 -15   34.30    3.20
  -4  -6 -15   36.10    2.40
   4  -6  15   38.30    3.70
   4   6  16   50.40    3.60
  -4   6 -16   49.10    3.80
  -4  -6 -16   53.80    3.70
  -4  -6 -16   48.80    2.60
   4  -6  16   47.80    3.90
   4   6  17  115.20    5.90
  -4   6 -17  115.40    6.90
  -4  -6 -17  117.40    5.90
  -4  -6 -17  130.80    4.90
   4  -6  17  116.50    6.30
   4   6  18   46.60    3.60
  -4   6 -18   43.70    3.80
  -4  -6 -18   45.60    3.70
   4  -6  18   35.90    3.70
   4   6  19   30.50    3.70
  -4   6 -19   39.90    3.90
  -4  -6 -19   33.00    3.60
   4  -6  19   32.00    3.80
   4  -6  19   37.70    2.90
   4   6  20   23.30    3.40
  -4   6 -20   30.30    4.70
  -4  -6 -20   24.50    4.70
   4  -6  20   10.20    4.50
   4  -6  20   22.80    2.60
   4   6  21   57.80    4.90
  -4   6 -21   76.60    5.90
  -4  -6 -21   73.30    5.10
   4  -6  21   72.00    4.10
  -4   6 -22   33.20    4.00
  -4  -6 -22   29.40    5.10
   4  -6  22   28.50    2.90
  -4   6 -23    2.40    3.30
  -4  -6 -23    3.00    5.20
   4  -6  23    1.20    1.70
  -4   6 -24   25.60    4.30
  -4  -6 -24   24.00    4.90
  -4   6 -25   41.10    5.00
  -4  -6 -25   41.30    5.20
  -4   6 -26    6.70    3.80
  -4  -6 -26    4.00    4.00
  -4   6 -27   16.10    4.40
  -4  -6 -27   14.10    4.50
  -4   6 -28    9.50    4.90
  -4  -6 -28    9.00    4.30
  -4  -6 -29   12.10    4.00
   4  -8 -34    9.60    3.80
   4   8 -33    3.30    3.60
   4  -8 -33   15.10    6.10
   4   8 -32   30.50    4.70
   4  -8 -32   24.40    4.50
   4   8 -31   -4.20    3.50
   4  -8 -31   -2.20    4.30
   4   8 -30   33.10    5.50
   4  -8 -30   36.20    5.00
   4   8 -29   13.10    3.70
  -4  -8  29    9.40    4.40
   4  -8 -29   12.80    3.20
   4   8 -28   38.50    4.40
  -4  -8  28   46.50    5.10
   4  -8 -28   39.10    4.00
   4   8 -27    0.80    3.50
  -4   8  27    9.80    4.40
  -4  -8  27   -0.70    3.10
   4  -8 -27    1.70    2.90
   4  -8 -27    3.30    3.20
   4   8 -26   55.80    4.40
  -4   8  26   46.90    4.30
  -4  -8  26   49.10    5.00
   4  -8 -26   48.70    3.90
   4  -8 -26   53.50    6.80
   4   8 -25    7.60    3.50
  -4   8  25    5.00    2.90
  -4  -8  25    2.50    3.30
  -4  -8  25   14.50    4.50
   4  -8 -25    8.90    2.90
   4  -8 -25    7.30    2.50
   4   8 -24   77.90    5.00
  -4   8  24   69.40    4.60
  -4  -8  24   81.10    5.40
  -4  -8  24   76.10    5.80
   4  -8 -24   76.50    4.30
   4  -8 -24   78.30    5.10
   4   8 -23   -1.10    3.10
  -4   8  23    2.10    2.30
  -4  -8  23   -2.90    3.80
  -4  -8  23   -1.20    3.20
   4  -8 -23   -2.00    2.80
   4  -8 -23    0.20    2.50
   4   8 -22   38.20    4.20
  -4   8  22   36.60    3.10
  -4  -8  22   40.30    4.20
  -4  -8  22   36.70    5.40
   4  -8 -22   34.80    2.90
   4  -8 -22   36.20    3.50
   4   8 -21   16.20    2.90
  -4   8  21   17.80    2.40
  -4  -8  21   14.30    5.40
  -4  -8  21   15.30    4.10
   4  -8 -21   12.70    2.80
   4  -8 -21   16.90    2.70
   4   8 -20  298.10   12.10
  -4   8  20  291.90   11.20
  -4  -8  20  295.30   11.60
  -4  -8  20  288.00   14.50
   4  -8 -20  306.10   11.90
   4  -8 -20  280.50   13.10
   4   8 -19   22.60    3.70
  -4   8  19   23.20    4.00
  -4  -8  19   19.30    3.20
  -4  -8  19   22.30    4.10
   4  -8 -19   23.90    2.50
   4  -8 -19   18.10    2.90
   4   8 -18   23.20    2.90
  -4   8  18   23.00    2.20
  -4  -8  18   21.90    3.10
   4  -8 -18   24.10    2.50
   4  -8 -18   26.00    3.00
   4   8 -17   38.70    3.10
  -4   8  17   41.80    2.80
  -4  -8  17   37.40    3.40
  -4  -8  17   42.30    3.00
   4  -8 -17   41.40    4.20
   4  -8 -17   40.20    3.50
   4   8 -16  159.50    6.90
  -4   8  16  148.60    6.00
  -4  -8  16  159.10    6.70
  -4  -8  16  154.20    7.50
   4  -8 -16  151.30    6.30
   4  -8 -16  143.90    7.50
   4   8 -15   -2.80    2.30
  -4   8  15   -0.70    1.30
  -4  -8  15    0.50    1.80
  -4  -8  15   -1.90    2.10
   4  -8 -15   -2.10    1.80
   4   8 -14   80.20    4.10
  -4   8  14   82.50    3.90
  -4  -8  14   81.50    4.30
  -4  -8  14   86.10    4.80
   4  -8 -14   77.70    4.10
   4   8 -13   22.80    2.20
  -4   8  13   21.70    2.00
  -4  -8  13   19.20    2.20
   4  -8 -13   19.00    2.00
   4   8 -12  375.00   13.20
  -4   8  12  357.20   13.20
  -4  -8  12  361.80   14.10
   4  -8 -12  358.70   13.50
   4   8 -11  137.30    6.00
  -4   8  11  139.20    5.40
  -4  -8  11  145.30    6.10
   4  -8 -11  135.40    6.20
   4   8 -10   44.60    2.70
  -4   8  10   43.30    2.50
  -4  -8  10   48.50    2.90
   4  -8 -10   41.60    2.60
   4   8  -9  138.10    5.60
  -4   8   9  142.10    5.70
  -4  -8   9  141.20    6.10
   4  -8  -9  137.80    5.80
   4   8  -8  285.30   11.40
  -4   8   8  280.10   10.60
  -4  -8   8  294.90   10.80
   4  -8  -8  269.60   10.80
   4   8  -7    1.80    1.70
   4   8  -7    3.60    1.70
  -4   8   7   -0.80    1.40
   4  -8  -7    1.80    1.50
   4   8  -6  120.70    5.50
   4   8  -6  129.70    5.40
  -4   8   6  120.00    5.30
   4  -8  -6  125.50    5.30
   4   8  -5  272.90   10.20
   4   8  -5  286.90   10.00
  -4   8   5  262.60   10.80
  -4   8   5  273.50   10.40
   4   8  -4  111.00    4.60
   4   8  -4  110.80    5.20
  -4   8   4  109.60    4.80
  -4   8   4  115.50    4.90
   4   8  -3   12.50    1.70
   4   8  -3   15.10    1.90
  -4   8   3   14.60    2.20
  -4   8   3   13.20    1.60
   4   8  -2   70.60    3.40
  -4   8   2   70.80    3.70
  -4   8   2   69.20    3.30
  -4  -8   2   68.20    3.20
   4   8  -1    7.30    1.90
  -4   8   1    7.60    1.80
  -4  -8   1    9.40    1.90
   4  -8  -1    9.10    1.70
   4   8   0  200.60    8.20
  -4   8   0  188.60    7.70
  -4  -8   0  189.30    7.70
   4  -8   0  201.20    7.60
   4   8   1  231.10    9.10
  -4   8  -1  222.70    9.50
  -4  -8  -1  226.10    8.70
   4  -8   1  225.30    8.90
   4   8   2   95.20    4.30
  -4   8  -2   90.90    4.80
  -4  -8  -2   90.70    3.90
   4  -8   2   93.90    4.50
   4   8   3    2.00    1.70
  -4   8  -3    1.70    1.40
  -4  -8  -3    2.70    2.60
   4  -8   3    4.20    2.20
   4   8   4  567.10   20.90
  -4   8  -4  550.60   19.70
  -4  -8  -4  551.10   19.50
   4  -8   4  537.60   18.50
   4   8   5   -1.90    2.20
  -4   8  -5   -0.60    1.60
  -4  -8  -5   -0.70    1.50
   4  -8   5    0.10    1.80
   4   8   6   42.10    2.70
  -4   8  -6   38.60    3.00
  -4  -8  -6   40.80    3.00
   4  -8   6   43.70    2.90
   4   8   7   76.40    3.80
  -4   8  -7   75.50    4.20
  -4  -8  -7   73.20    4.20
   4  -8   7   77.50    3.80
   4  -8   7   76.90    3.10
   4   8   8  251.40    9.50
  -4   8  -8  244.30   10.30
  -4  -8  -8  252.40   10.00
   4  -8   8  253.80    9.60
   4   8   9    7.20    1.90
  -4   8  -9   11.60    2.00
  -4  -8  -9    6.40    2.00
   4  -8   9    8.50    2.00
   4   8  10   78.20    4.00
  -4   8 -10   72.10    3.60
  -4  -8 -10   69.20    3.70
   4  -8  10   73.10    4.00
   4   8  11   -0.30    1.90
  -4   8 -11   -3.00    2.10
  -4  -8 -11    1.00    2.00
   4  -8  11   -4.60    1.90
   4   8  12   89.00    4.50
  -4   8 -12   94.50    4.50
  -4  -8 -12   91.00    4.60
   4  -8  12   99.20    4.90
   4   8  13    8.70    3.80
  -4   8 -13    4.80    2.30
  -4  -8 -13    6.80    2.10
   4  -8  13    8.30    2.50
   4   8  14   31.80    3.30
  -4   8 -14   34.90    3.50
  -4  -8 -14   28.80    2.80
   4  -8  14   36.10    3.80
   4   8  15   31.00    4.10
  -4   8 -15   24.70    2.70
  -4  -8 -15   37.10    5.70
   4  -8  15   30.10    3.10
   4   8  16  174.90    7.60
  -4   8 -16  174.60    8.10
  -4  -8 -16  181.70    8.40
   4  -8  16  170.40    8.40
   4   8  17    1.10    2.60
  -4   8 -17    8.60    3.90
  -4  -8 -17   -2.40    3.20
  -4  -8 -17   -0.20    1.70
   4  -8  17    5.30    3.10
   4   8  18   51.00    3.70
  -4   8 -18   63.30    5.10
  -4  -8 -18   51.80    3.90
  -4  -8 -18   50.50    3.00
   4  -8  18   48.40    4.20
   4   8  19   51.20    4.10
  -4   8 -19   62.10    5.00
  -4  -8 -19   59.60    5.30
  -4  -8 -19   53.20    3.00
   4  -8  19   46.20    4.90
   4   8  20   63.50    4.80
  -4   8 -20   85.40    7.60
  -4  -8 -20   69.10    5.00
  -4  -8 -20   70.60    3.50
  -4   8 -21   10.40    4.10
  -4  -8 -21    6.30    3.80
   4  -8  21    5.50    2.60
  -4   8 -22   38.70    4.80
  -4  -8 -22   34.00    5.80
   4  -8  22   28.80    3.30
  -4   8 -23    3.90    3.80
  -4  -8 -23    0.60    5.10
   4  -8  23   -1.10    2.90
  -4   8 -24   87.20    6.70
  -4  -8 -24   87.10    7.00
  -4   8 -25    6.40    4.00
  -4  -8 -25    9.50    3.80
  -4   8 -26   16.70    3.90
  -4  -8 -26   21.50    5.40
  -4   8 -27    4.80    3.80
  -4  -8 -27    5.70    4.10
  -4  -8 -28   24.40    4.60
   4 -10 -33    3.90    4.10
   4  10 -32   10.00    4.90
   4 -10 -32    8.70    4.00
   4  10 -31   10.00    7.00
   4 -10 -31   -4.60    3.80
   4  10 -30   24.90    4.50
   4 -10 -30   29.60    4.20
   4  10 -29   14.50    5.20
  -4 -10  29    8.90    3.90
   4 -10 -29   14.70    4.10
   4  10 -28   26.70    5.10
  -4 -10  28   26.10    4.60
   4 -10 -28   29.30    4.10
   4  10 -27    1.40    5.90
  -4 -10  27   -0.80    3.40
   4 -10 -27    0.90    2.60
   4  10 -26   40.40    4.30
  -4  10  26   40.00    4.80
  -4 -10  26   42.00    5.30
   4 -10 -26   37.30    3.70
   4 -10 -26   34.00    4.10
   4  10 -25   10.10    3.40
  -4  10  25   35.00    8.20
  -4 -10  25   15.00    4.50
   4 -10 -25    6.40    3.40
   4 -10 -25    9.70    2.90
   4  10 -24   64.20    4.80
  -4  10  24   62.90    4.20
  -4 -10  24   63.90    5.30
   4 -10 -24   62.20    4.20
   4 -10 -24   64.30    5.00
   4  10 -23   -5.50    2.90
  -4  10  23   -0.50    2.40
  -4 -10  23   -6.30    3.30
  -4 -10  23   -1.20    3.20
   4 -10 -23   -2.20    2.80
   4 -10 -23    1.90    3.30
   4  10 -22  138.00    6.50
  -4  10  22  136.00    7.00
  -4 -10  22  144.50    7.60
  -4 -10  22  144.20    8.80
   4 -10 -22  127.40    6.00
   4 -10 -22  134.50    7.80
   4  10 -21   28.70    3.70
  -4  10  21   33.60    3.70
  -4 -10  21   28.40    3.60
   4 -10 -21   28.40    3.20
   4 -10 -21   25.60    3.40
   4  10 -20   51.80    4.10
  -4  10  20   54.70    3.90
  -4 -10  20   52.10    4.60
   4 -10 -20   46.20    3.50
   4 -10 -20   47.60    4.30
   4  10 -19    1.10    2.50
  -4  10  19    4.40    2.20
  -4 -10  19   43.00   13.50
   4 -10 -19    4.30    2.20
   4 -10 -19    1.80    4.60
   4  10 -18   73.00    4.50
  -4  10  18   74.60    4.10
  -4 -10  18   72.10    4.20
  -4 -10  18   75.00    4.90
   4 -10 -18   74.60    4.20
   4 -10 -18   68.80    5.60
   4  10 -17   25.90    3.20
  -4  10  17   30.60    4.30
  -4 -10  17   31.50    4.10
  -4 -10  17   24.20    3.70
   4 -10 -17   23.00    2.30
   4  10 -16  282.20   10.80
  -4  10  16  293.00   10.90
  -4 -10  16  294.40   11.50
  -4 -10  16  299.80   12.70
   4 -10 -16  287.60   13.10
   4  10 -15   -0.60    2.60
  -4  10  15    1.70    1.60
  -4 -10  15   -0.20    2.10
  -4 -10  15    1.00    2.30
   4 -10 -15    1.50    1.80
   4  10 -14   87.70    4.70
  -4  10  14   87.10    4.00
  -4 -10  14  103.00    6.50
   4 -10 -14   85.20    4.30
   4  10 -13   11.10    2.30
  -4  10  13   12.50    1.90
  -4 -10  13   14.40    2.70
   4 -10 -13    9.40    2.00
   4  10 -12  137.10    6.80
  -4  10  12  140.60    5.60
  -4 -10  12  144.40    6.20
   4 -10 -12  137.90    5.80
   4  10 -11    1.40    2.20
  -4  10  11    3.10    1.40
  -4 -10  11    6.00    1.90
   4 -10 -11    4.10    1.90
   4  10 -10   77.90    4.30
  -4  10  10   77.40    3.70
  -4 -10  10   80.40    3.90
   4 -10 -10   78.00    3.90
   4  10  -9   52.20    3.20
  -4  10   9   48.20    2.70
  -4 -10   9   48.90    3.00
   4 -10  -9   46.50    2.80
   4  10  -8  391.50   13.70
   4  10  -8  405.70   14.80
  -4  10   8  385.40   14.70
   4 -10  -8  381.50   15.20
   4  10  -7   18.50    2.80
   4  10  -7   15.10    1.90
  -4  10   7   12.80    1.90
   4 -10  -7   14.60    1.80
   4  10  -6   58.70    4.10
   4  10  -6   59.70    3.10
  -4  10   6   56.70    3.30
  -4  10   6   57.10    3.20
   4  10  -5   -2.80    2.50
   4  10  -5   -0.30    1.90
  -4  10   5    1.20    1.50
  -4  10   5    2.50    1.90
   4  10  -4  103.60    5.00
   4  10  -4  107.50    5.30
  -4  10   4  110.70    5.00
  -4  10   4  112.20    5.50
   4  10  -3   16.90    2.10
   4  10  -3   20.70    2.20
  -4  10   3   15.20    1.70
  -4  10   3   17.40    2.20
   4  10  -2  114.90    5.30
  -4  10   2  113.60    5.30
  -4  10   2  113.60    5.40
  -4 -10   2  106.10    5.40
   4  10  -1   12.10    2.40
  -4  10   1    8.60    2.40
  -4  10   1    9.30    2.00
  -4 -10   1    8.80    2.20
   4  10   0  168.40    7.00
  -4  10   0  160.40    7.00
  -4 -10   0  163.70    6.70
   4 -10   0  167.90    7.60
   4  10   1    1.10    1.70
  -4  10  -1   -1.50    1.90
  -4 -10  -1    0.40    1.80
   4 -10   1    2.00    1.60
   4  10   2   65.80    3.50
  -4  10  -2   65.10    3.60
  -4 -10  -2   61.40    3.60
   4 -10   2   63.90    3.50
   4  10   3   56.70    3.10
  -4  10  -3   59.40    3.30
  -4 -10  -3   60.80    3.40
   4 -10   3   58.20    3.10
   4  10   4  174.20    7.10
  -4  10  -4  165.40    7.40
  -4 -10  -4  171.10    7.80
   4 -10   4  169.70    7.60
   4  10   5   13.50    2.50
  -4  10  -5   12.60    2.00
  -4 -10  -5   14.10    3.80
   4 -10   5   18.60    2.00
   4  10   6   81.50    4.20
  -4  10  -6   85.10    4.20
  -4 -10  -6   84.10    4.10
   4 -10   6   87.30    4.30
   4  10   7   -1.70    1.80
  -4  10  -7   -2.70    1.70
  -4 -10  -7    0.10    1.90
   4 -10   7    1.90    1.90
   4  10   8  265.10   10.20
  -4  10  -8  258.70   10.20
  -4 -10  -8  247.80    9.80
   4 -10   8  259.70    9.70
   4  10   9   64.90    3.60
  -4  10  -9   66.80    4.70
  -4 -10  -9   61.40    3.50
   4 -10   9   59.90    3.70
   4  10  10   40.10    3.10
  -4  10 -10   39.50    3.30
  -4 -10 -10   41.00    3.10
   4 -10  10   43.60    3.40
   4  10  11   71.20    5.00
  -4  10 -11   67.90    4.20
   4 -10  11   65.30    3.90
   4  10  12   99.30    5.10
  -4  10 -12   96.20    5.40
   4 -10  12   99.40    4.90
   4  10  13   -1.70    2.30
  -4  10 -13   -1.00    2.60
  -4 -10 -13   -2.00    3.70
   4 -10  13   -1.90    2.50
   4  10  14   80.60    5.00
  -4  10 -14   86.50    4.90
  -4 -10 -14   84.80    4.50
   4 -10  14   94.90    7.20
   4  10  15    6.80    2.70
  -4  10 -15   11.40    3.30
  -4 -10 -15   10.10    3.10
   4 -10  15   14.00    3.00
   4  10  16   32.00    3.30
  -4  10 -16   42.60    3.80
  -4 -10 -16   35.50    3.30
   4 -10  16   36.70    3.70
   4  10  17   37.00    3.80
  -4  10 -17   43.50    4.30
  -4 -10 -17   41.30    4.80
   4 -10  17   45.70    4.70
   4  10  18   61.80    5.10
  -4  10 -18   58.90    5.00
  -4 -10 -18   54.90    4.50
   4 -10  18   41.60    4.50
   4  10  19   -2.70    3.50
  -4  10 -19    4.60    3.30
  -4 -10 -19    3.20    3.30
  -4 -10 -19    3.00    2.20
  -4  10 -20   64.50    5.30
  -4 -10 -20   65.10    4.90
  -4 -10 -20   53.00    3.40
  -4  10 -21    5.00    3.60
  -4 -10 -21    3.90    3.90
  -4  10 -22   34.60    4.80
  -4 -10 -22   29.20    4.60
  -4  10 -23   -1.40    3.70
  -4 -10 -23    3.10    4.20
  -4  10 -24   49.60    5.60
  -4 -10 -24   41.60    5.50
  -4  10 -25   10.30    4.60
  -4 -10 -25   14.00    5.30
  -4  10 -26   29.10    5.10
  -4 -10 -26   20.60    5.40
  -4 -10 -27    0.90    4.00
   4 -12 -32    4.90    3.40
   4 -12 -31    5.90    3.00
   4  12 -30    5.30    4.60
   4 -12 -30    4.40    3.50
   4  12 -29   21.50    4.60
  -4 -12  29   19.30    5.00
   4 -12 -29   16.30    3.80
   4  12 -28   -3.90    5.40
  -4 -12  28   21.80   10.80
   4 -12 -28    7.30    3.80
   4  12 -27   10.20    5.40
  -4 -12  27   11.00    4.30
   4 -12 -27   13.20    3.50
   4  12 -26   28.00    5.60
  -4 -12  26   28.40    4.90
   4 -12 -26   29.30    3.50
   4  12 -25   48.20    6.10
  -4  12  25   41.90    4.10
  -4 -12  25   52.30    6.00
   4 -12 -25   53.50    4.40
   4 -12 -25   40.70    4.80
   4  12 -24   22.20    3.70
  -4  12  24   18.30    3.20
  -4 -12  24   22.40    4.40
   4 -12 -24   25.10    3.40
   4 -12 -24   19.80    4.30
   4  12 -23   20.80    3.60
  -4  12  23   11.70    3.70
   4 -12 -23   22.90    3.20
   4 -12 -23   22.30    3.90
   4  12 -22   17.40    5.40
  -4  12  22   16.80    2.90
   4 -12 -22   16.50    3.50
   4 -12 -22   20.50    4.30
   4  12 -21   66.30    4.70
  -4  12  21   60.50    4.30
  -4 -12  21   46.30    4.40
   4 -12 -21   54.90    4.20
   4 -12 -21   54.80    4.60
   4  12 -20   17.70    3.20
  -4  12  20   17.90    3.40
  -4 -12  20   16.30    3.20
   4 -12 -20   17.60    3.20
   4 -12 -20   17.40    3.40
   4  12 -19   36.80    3.80
  -4  12  19   38.70    3.70
  -4 -12  19   29.60    3.20
  -4 -12  19   40.20    3.70
   4 -12 -19   42.00    3.80
   4  12 -18   31.20    3.40
  -4  12  18   31.30    2.80
  -4 -12  18   31.70    3.50
  -4 -12  18   30.20    3.10
   4 -12 -18   30.00    3.20
   4  12 -17   69.80    4.40
  -4  12  17   70.20    3.70
  -4 -12  17   67.70    4.40
  -4 -12  17   70.50    4.10
   4 -12 -17   67.40    4.20
   4  12 -16    8.90    3.20
  -4  12  16   10.70    3.00
  -4 -12  16    8.20    2.70
   4 -12 -16   13.10    2.60
   4  12 -15   26.60    3.20
  -4  12  15   20.10    2.20
  -4 -12  15   25.90    4.40
   4 -12 -15   17.50    2.70
   4  12 -14   44.10    4.80
  -4  12  14   44.60    3.00
  -4 -12  14   47.20    3.40
   4 -12 -14   49.00    3.30
   4  12 -13  103.60    5.30
  -4  12  13  103.50    4.90
  -4 -12  13  102.20    5.10
   4 -12 -13  107.00    4.70
   4  12 -12   12.70    2.50
  -4  12  12   16.20    2.30
  -4 -12  12   12.00    2.30
   4 -12 -12   15.50    2.20
   4  12 -11  180.60    8.10
  -4  12  11  187.40    7.70
  -4 -12  11  188.30    7.80
   4 -12 -11  180.40    7.70
   4  12 -10   58.00    3.50
   4  12 -10   60.30    3.60
  -4  12  10   58.90    3.60
   4 -12 -10   64.20    3.60
   4  12  -9  137.80    6.00
   4  12  -9  141.90    5.90
  -4  12   9  136.60    5.70
   4 -12  -9  137.30    6.00
   4  12  -8   16.00    2.50
   4  12  -8   20.20    2.40
  -4  12   8   17.10    2.00
   4 -12  -8   22.10    2.50
   4  12  -7   74.40    4.10
   4  12  -7   75.60    3.90
  -4  12   7   78.90    4.00
  -4  12   7   77.80    3.80
   4  12  -6  142.00    6.50
   4  12  -6  139.70    6.30
  -4  12   6  140.30    6.80
  -4  12   6  149.00    6.10
   4  12  -5  156.30    6.60
   4  12  -5  158.80    6.70
  -4  12   5  157.60    6.50
  -4  12   5  159.60    6.60
   4  12  -4   16.60    2.50
   4  12  -4   13.60    2.10
  -4  12   4   11.90    2.20
  -4  12   4   13.00    2.10
   4  12  -3   56.70    3.50
   4  12  -3   58.10    3.70
  -4  12   3   63.50    3.50
  -4  12   3   58.50    3.30
   4  12  -2   47.80    3.20
   4  12  -2   53.10    3.60
  -4  12   2   46.70    3.10
  -4  12   2   50.10    3.00
   4  12  -1   79.30    4.40
  -4  12   1   81.50    4.20
  -4  12   1   80.20    4.60
  -4 -12   1   76.10    4.10
   4  12   0   54.40    3.10
  -4  12   0   55.50    3.60
  -4  12   0   55.00    3.50
  -4 -12   0   49.20    3.20
   4  12   1    7.00    2.10
  -4  12  -1    5.90    2.00
  -4  12  -1    6.30    2.40
  -4 -12  -1    5.10    2.40
   4  12   2    7.50    2.50
  -4  12  -2    8.80    2.10
  -4 -12  -2    9.20    2.60
   4 -12   2    8.50    2.00
   4  12   3  147.10    6.20
  -4  12  -3  146.40    6.40
  -4 -12  -3  138.10    6.40
   4 -12   3  142.20    6.00
   4  12   4   42.20    3.40
  -4  12  -4   37.10    3.10
  -4 -12  -4   31.80    2.70
   4 -12   4   34.90    2.60
   4  12   5   40.90    3.40
  -4  12  -5   38.10    3.40
  -4 -12  -5   37.00    2.80
   4 -12   5   39.00    2.90
   4  12   6   76.50    5.30
  -4  12  -6   71.40    4.50
  -4 -12  -6   77.60    4.00
   4 -12   6   83.80    4.10
   4  12   7   27.40    2.60
  -4  12  -7   31.20    2.80
  -4 -12  -7   26.50    2.80
   4 -12   7   33.60    3.00
   4  12   8    3.60    3.50
  -4  12  -8    0.90    2.30
  -4 -12  -8    2.70    2.10
   4 -12   8    0.30    2.60
   4  12   9   24.30    2.70
  -4  12  -9   23.20    3.00
  -4 -12  -9   25.20    2.60
   4 -12   9   26.50    2.90
   4  12  10   31.50    3.00
  -4  12 -10   38.20    3.40
  -4 -12 -10   39.40    3.30
   4 -12  10   39.40    3.40
   4  12  11   39.90    3.60
  -4  12 -11   31.30    3.00
  -4 -12 -11   32.40    3.00
   4 -12  11   36.50    3.50
   4  12  12    3.40    2.50
  -4  12 -12    5.90    2.60
  -4 -12 -12    9.00    2.50
   4 -12  12    8.00    3.10
   4  12  13   55.30    3.80
  -4  12 -13   48.60    4.10
  -4 -12 -13   56.70    4.30
   4 -12  13   56.20    4.10
   4  12  14   67.30    4.40
  -4  12 -14   66.70    4.90
  -4 -12 -14   63.10    4.40
   4 -12  14   65.70    4.60
   4  12  15   78.40    4.80
  -4  12 -15   91.70    5.30
  -4 -12 -15   94.60    6.10
   4 -12  15   91.60    5.30
   4  12  16    3.10    3.30
  -4 -12 -16    0.20    2.80
   4 -12  16   -6.00    3.30
   4  12  17   38.80    3.80
  -4  12 -17   48.20    3.90
  -4 -12 -17   55.40    4.50
  -4  12 -18   29.90    4.10
  -4 -12 -18   30.20    3.90
  -4  12 -19   44.70    4.70
  -4 -12 -19   43.70    5.60
  -4  12 -20   10.60    4.00
  -4 -12 -20    5.10    3.70
  -4  12 -21   61.20    5.70
  -4 -12 -21   51.50    5.50
  -4  12 -22    4.00    4.90
  -4 -12 -22    8.20    4.90
  -4  12 -23   32.30    5.40
  -4 -12 -23   34.30    4.80
  -4  12 -24    7.10    4.40
  -4 -12 -24    4.70    4.60
  -4  12 -25   10.30    4.10
  -4 -12 -25   19.50    4.70
  -4 -12 -26    1.80    5.60
   4 -14 -30   -1.70    3.40
   4 -14 -29    2.60    3.90
   4  14 -28    3.40    4.00
  -4 -14  28    4.80    4.40
   4 -14 -28   -7.20    3.10
   4  14 -27   52.80    6.10
  -4 -14  27   46.70    6.10
   4 -14 -27   54.80    4.40
   4  14 -26    3.40    5.20
  -4 -14  26   -1.50    4.00
   4 -14 -26   -0.10    3.70
   4  14 -25   20.00   10.80
  -4 -14  25    6.20    5.60
   4 -14 -25    4.90    3.00
   4  14 -24    5.80    3.90
   4 -14 -24   -1.90    2.40
   4 -14 -24   -0.70    3.60
   4  14 -23   60.70    5.20
  -4  14  23   39.00    4.10
   4 -14 -23   50.60    4.30
   4 -14 -23   41.60    4.50
   4  14 -22    4.40    4.20
  -4  14  22    0.00    2.30
   4 -14 -22   -4.20    3.10
   4 -14 -22   -3.30    3.90
   4  14 -21   35.60    6.00
  -4  14  21   27.20    3.50
   4 -14 -21   25.80    3.60
   4  14 -20   -2.00    3.40
  -4  14  20    3.80    2.40
  -4 -14  20    0.90    2.40
   4 -14 -20    3.60    3.30
   4  14 -19   57.80    6.10
  -4  14  19   48.80    3.50
  -4 -14  19   51.50    3.70
   4 -14 -19   53.60    3.80
   4  14 -18   -5.10    4.10
  -4  14  18   -0.80    2.10
  -4 -14  18   -3.40    4.00
  -4 -14  18   -1.50    2.50
   4 -14 -18   -6.00    2.30
   4  14 -17  127.10    7.10
  -4  14  17  125.60    5.80
  -4 -14  17  122.50    6.40
   4 -14 -17  124.80    6.70
   4  14 -16   -3.30    3.60
  -4  14  16    2.10    2.00
  -4 -14  16    2.60    2.90
   4 -14 -16    3.60    3.50
   4  14 -15   53.40    4.40
  -4  14  15   56.20    3.40
  -4 -14  15   72.80    6.90
   4 -14 -15   52.30    3.40
   4  14 -14    7.20    4.70
  -4  14  14   -3.60    2.60
  -4 -14  14    1.00    2.50
   4  14 -13   56.10    3.80
  -4  14  13   55.90    3.90
  -4 -14  13   59.50    4.50
   4  14 -12    2.80    3.20
   4  14 -12    5.70    4.00
  -4  14  12    3.20    1.90
   4 -14 -12    4.90    2.40
   4  14 -11  117.40    5.90
   4  14 -11  116.00    6.20
  -4  14  11  122.70    5.90
   4 -14 -11  123.30    5.70
   4  14 -10   -0.20    2.30
   4  14 -10    1.70    2.20
  -4  14  10    4.30    2.10
   4 -14 -10    9.80    2.30
   4  14  -9  114.60    5.40
   4  14  -9  102.80    5.20
  -4  14   9  108.90    5.40
   4 -14  -9  117.60    5.10
   4  14  -8    8.70    2.70
   4  14  -8    7.20    2.30
  -4  14   8    9.10    2.30
  -4  14   8    9.70    2.10
   4  14  -7   57.90    4.00
   4  14  -7   68.20    4.00
  -4  14   7   66.70    4.80
  -4  14   7   64.00    3.70
   4  14  -6    1.20    2.60
   4  14  -6    3.20    2.20
  -4  14   6   12.10    3.70
  -4  14   6   -2.20    1.80
   4  14  -5   59.90    3.90
   4  14  -5   61.90    4.00
  -4  14   5   58.10    4.70
  -4  14   5   56.30    3.30
   4  14  -4   28.10    3.30
   4  14  -4   28.30    3.50
  -4  14   4   25.70    2.80
  -4  14   4   27.30    2.80
   4  14  -3  199.80    8.50
   4  14  -3  207.70    9.40
  -4  14   3  215.40    8.80
  -4  14   3  208.60    9.10
   4  14  -2   23.40    2.90
   4  14  -2   23.90    2.50
  -4  14   2   23.20    2.80
  -4  14   2   22.10    2.40
   4  14  -1   45.50    3.20
   4  14  -1   42.70    3.20
  -4  14   1   50.50    3.50
  -4  14   1   45.10    6.80
   4  14   0   26.80    2.90
   4  14   0   33.60    3.20
  -4  14   0   35.00    3.20
  -4  14   0   59.00    7.50
  -4 -14   0   36.00    3.00
   4  14   1   84.40    4.70
  -4  14  -1   89.70    4.70
  -4  14  -1   89.30    4.20
  -4 -14  -1   90.80    4.50
   4  14   2   -2.30    2.50
  -4  14  -2   -0.70    2.20
  -4  14  -2   -1.80    2.00
  -4 -14  -2    0.50    2.30
   4  14   3   56.90    4.00
  -4  14  -3   61.00    4.00
  -4  14  -3   60.50    3.60
  -4 -14  -3   56.60    3.80
   4  14   4   34.40    2.90
  -4  14  -4   35.70    2.90
  -4 -14  -4   31.20    3.00
   4 -14   4   35.00    3.00
   4  14   5   53.70    3.80
  -4  14  -5   57.30    3.90
  -4 -14  -5   53.00    3.60
   4 -14   5   48.50    3.50
   4  14   6   15.20    3.30
  -4  14  -6   18.90    2.90
  -4 -14  -6   20.30    3.10
   4 -14   6   20.60    3.10
   4  14   7   46.30    3.40
  -4  14  -7   45.00    3.60
   4 -14   7   47.80    5.20
   4  14   8   14.00    2.80
  -4  14  -8   10.00    2.80
   4 -14   8   11.00    3.10
   4  14   9   91.60    4.90
  -4  14  -9   94.60    4.90
   4 -14   9   99.60    5.70
   4  14  10    4.90    2.70
  -4  14 -10    3.60    2.60
  -4 -14 -10   -0.30    2.70
   4 -14  10   -2.70    4.90
   4  14  11   80.00    7.90
  -4  14 -11   71.70    4.90
  -4 -14 -11   62.50    4.60
   4 -14  11   68.90    4.50
   4 -14  11   74.10    2.90
   4  14  12   13.60    2.90
  -4  14 -12   14.10    3.50
  -4 -14 -12   14.70    2.90
   4 -14  12   15.60    4.40
   4  14  13   29.40    3.20
  -4  14 -13   27.70    4.10
  -4 -14 -13   35.20    4.10
   4 -14  13   29.00    4.10
   4  14  14   -2.20    4.00
  -4  14 -14   -4.70    3.40
  -4 -14 -14    0.70    3.30
   4 -14  14   -6.70    2.80
  -4  14 -15   45.80    4.50
  -4 -14 -15   51.60    4.00
  -4  14 -16    2.30    3.90
  -4 -14 -16   -1.80    3.10
  -4  14 -17   32.00    4.10
  -4 -14 -17   38.80    4.90
  -4  14 -18    1.10    3.60
  -4 -14 -18    0.60    3.00
  -4  14 -19   58.80    5.30
  -4 -14 -19   57.20    5.70
  -4  14 -20   15.70    4.80
  -4 -14 -20   18.60    3.80
  -4  14 -21   43.40    5.20
  -4 -14 -21   45.70    5.70
  -4  14 -22    4.90    5.50
  -4 -14 -22   -0.30    4.70
  -4  14 -23   26.40    5.10
  -4 -14 -23   12.70    4.00
  -4 -14 -24    7.90    5.20
  -4 -14 -25   14.70    5.10
   4 -16 -29    0.10    3.30
  -4 -16  28   12.30    5.50
   4 -16 -28   12.80    3.20
  -4 -16  27    4.80    6.20
   4 -16 -27    8.80    3.80
   4  16 -26    6.50    4.50
   4 -16 -26    3.50    2.90
   4  16 -25    4.00    3.60
   4 -16 -25   -3.90    3.80
   4  16 -24  113.70   22.80
   4 -16 -24   16.60    3.40
   4  16 -23   30.70    6.10
   4 -16 -23   30.10    3.70
   4 -16 -23   21.30    4.80
   4  16 -22   31.50    4.70
   4 -16 -22   25.50    4.00
   4  16 -21    7.20    3.60
  -4  16  21   -7.20    2.90
   4 -16 -21    1.40    3.20
   4  16 -20   17.80    5.70
  -4  16  20   22.10    4.30
  -4 -16  20   18.40    3.60
   4 -16 -20   15.80    3.20
   4  16 -19   40.30    4.30
  -4  16  19   31.00    3.50
  -4 -16  19   34.60    3.90
   4 -16 -19   35.20    3.30
   4  16 -18   24.40    3.90
  -4  16  18   29.00    3.70
  -4 -16  18   28.10    3.80
   4 -16 -18   28.70    3.40
   4  16 -17    6.90    4.10
  -4  16  17   13.60    3.60
   4 -16 -17   10.20    2.90
   4  16 -16   25.40    3.50
  -4  16  16   16.40    3.10
   4 -16 -16   24.70    3.50
   4  16 -15   35.20    3.60
  -4  16  15   34.40    3.60
   4 -16 -15   35.70    3.10
   4  16 -14    7.10    4.00
   4  16 -14    4.00    2.90
  -4  16  14   11.50    2.40
   4 -16 -14   13.50    2.70
   4  16 -13    2.00    4.40
   4  16 -13    1.00    3.10
  -4  16  13   -2.00    2.20
   4 -16 -13   10.90    3.50
   4  16 -12   26.30    6.00
   4  16 -12   21.30    3.20
  -4  16  12   26.30    2.90
   4 -16 -12   31.30    2.80
   4  16 -11   36.10    3.50
   4  16 -11   41.50    3.80
  -4  16  11   36.00    3.50
   4 -16 -11   37.80    3.20
   4  16 -10   42.30    3.50
   4  16 -10   39.00    3.50
  -4  16  10   45.50    3.90
  -4  16  10   48.90    3.60
   4  16  -9   18.30    3.20
   4  16  -9   17.90    2.90
  -4  16   9   17.90    2.80
  -4  16   9   21.00    3.10
   4  16  -8   77.20    4.80
   4  16  -8   66.20    4.60
  -4  16   8   66.50    3.90
  -4  16   8   69.60    4.20
   4  16  -7    9.20    2.80
   4  16  -7    5.40    2.90
  -4  16   7    7.70    2.10
  -4  16   7    7.70    2.80
   4  16  -6   11.00    3.10
   4  16  -6   12.60    2.70
  -4  16   6   14.90    2.50
  -4  16   6   15.70    2.20
   4  16  -5    1.40    2.80
   4  16  -5    3.90    2.70
  -4  16   5    3.50    2.30
  -4  16   5    2.70    2.30
   4  16  -4  118.90    5.80
   4  16  -4  124.60    6.10
  -4  16   4  128.50    5.90
  -4  16   4  120.50    6.10
   4  16  -3   68.80    4.40
   4  16  -3   64.10    4.40
  -4  16   3   70.10    4.30
  -4  16   3   68.50    4.10
   4  16  -2  128.80    6.90
   4  16  -2  125.20    6.00
  -4  16   2  128.60    6.00
  -4  16   2  127.70    5.90
   4  16  -1   78.50    5.20
   4  16  -1   79.20    4.80
  -4  16   1   81.60    4.70
  -4  16   1   75.70    4.30
   4  16   0   10.30    2.80
   4  16   0    5.90    3.20
  -4  16   0    8.30    2.40
  -4  16   0    5.00    2.30
   4  16   1    8.20    4.60
   4  16   1    4.40    2.50
  -4  16  -1    8.30    2.40
  -4  16  -1    5.20    2.80
   4  16   2  180.00    8.30
  -4  16  -2  181.40    8.20
  -4  16  -2  173.40    8.00
  -4 -16  -2  176.90    8.20
   4  16   3   95.10    5.20
  -4  16  -3  100.90    4.90
  -4  16  -3   98.10    5.30
  -4 -16  -3   98.00    4.90
   4  16   4   43.50    3.80
  -4  16  -4   44.70    3.60
  -4  16  -4   51.70    4.00
  -4 -16  -4   44.20    3.50
   4  16   5   64.60    4.60
  -4  16  -5   60.00    4.10
  -4  16  -5   50.20    3.80
  -4 -16  -5   57.90    3.90
   4  16   6   41.90    3.60
  -4  16  -6   38.20    3.60
  -4 -16  -6   40.40    4.50
   4 -16   6   36.80    3.40
   4  16   7   25.60    3.80
  -4  16  -7   20.10    3.10
  -4 -16  -7   24.30    4.60
   4 -16   7   23.20    3.20
   4  16   8   35.40    3.40
  -4  16  -8   39.80    3.60
  -4 -16  -8   38.30    3.80
   4 -16   8   45.20    3.70
   4  16   9   21.10    3.30
  -4  16  -9   25.30    3.10
   4 -16   9   27.80    5.40
   4  16  10   28.40    3.70
  -4  16 -10   34.60    3.80
   4 -16  10   23.70    3.40
   4  16  11   29.60    3.60
  -4  16 -11   30.80    3.60
   4 -16  11   26.70    3.30
  -4  16 -12   11.80    3.30
  -4  16 -13   10.00    3.40
  -4 -16 -13   11.60    6.40
  -4  16 -14   40.20    4.20
  -4 -16 -14   31.30    3.90
  -4  16 -15   34.40    4.30
  -4 -16 -15   34.80    5.00
  -4  16 -16   17.50    3.90
  -4 -16 -16   22.60    4.00
  -4  16 -17   -4.30    3.60
  -4 -16 -17    9.00    4.60
  -4  16 -18   14.80    4.40
  -4 -16 -18   14.90    3.90
  -4  16 -19   27.20    5.80
  -4 -16 -19   16.10    3.80
  -4  16 -20    6.40    4.90
  -4 -16 -20    4.10    5.20
  -4  16 -21    4.60    4.30
  -4 -16 -21   -1.10    3.40
  -4  16 -22   32.10    5.10
  -4 -16 -22   43.80    6.50
  -4 -16 -23    9.50    4.70
   4 -18 -27   -2.50    2.50
   4 -18 -26   19.20    4.10
   4 -18 -25    0.50    3.10
   4  18 -24   21.20    4.50
   4 -18 -24   13.60    4.10
   4  18 -23   -1.60    4.00
   4 -18 -23   -7.10    4.00
   4  18 -22   12.90    3.60
   4 -18 -22   20.40    4.50
   4  18 -21   -1.70    4.10
   4 -18 -21   -0.80    3.30
   4  18 -20   21.30    4.90
   4 -18 -20   20.20    3.90
   4  18 -19    0.40    4.50
   4 -18 -19   -0.50    3.20
   4  18 -18   30.10    4.80
  -4  18  18   21.40    4.70
   4 -18 -18   30.80    3.90
   4  18 -17   -1.10    3.40
  -4  18  17   -4.10    2.80
   4 -18 -17    4.30    3.30
   4  18 -16   23.00    3.60
  -4  18  16   19.00    3.20
   4 -18 -16   22.20    3.10
   4  18 -15    3.90    4.70
  -4  18  15    1.50    3.10
   4 -18 -15    2.00    3.30
   4  18 -14   92.90    5.30
  -4  18  14   81.10    4.80
   4 -18 -14   88.30    5.70
   4  18 -13    2.60    3.20
  -4  18  13    4.90    3.20
   4  18 -12   11.30    4.20
  -4  18  12    6.10    4.20
  -4  18  12    5.20    2.90
   4  18 -11    4.70    4.00
  -4  18  11    2.20    3.70
  -4  18  11    4.20    2.80
   4  18 -10   60.10    5.00
  -4  18  10   63.60    4.20
  -4  18  10   55.00    3.80
   4  18  -9   23.20    3.60
   4  18  -9    9.20    3.50
  -4  18   9   20.00    3.30
  -4  18   9   18.90    2.90
   4  18  -8   41.50    4.10
   4  18  -8   34.50    3.90
  -4  18   8   38.10    3.10
  -4  18   8   35.70    3.10
   4  18  -7    1.80    3.20
   4  18  -7   -2.90    2.40
  -4  18   7   -0.70    2.70
  -4  18   7    2.70    3.20
   4  18  -6   88.80    5.50
   4  18  -6   79.70    5.10
  -4  18   6   80.10    4.80
  -4  18   6   77.10    4.90
   4  18  -5   17.10    3.50
   4  18  -5    9.50    3.10
  -4  18   5   14.30    3.30
  -4  18   5   11.90    2.80
   4  18  -4   92.20    5.90
   4  18  -4   85.60    5.00
  -4  18   4   90.10    4.60
  -4  18   4   80.20    4.60
   4  18  -3    5.00    3.10
   4  18  -3    7.50    4.60
  -4  18   3   11.90    6.30
  -4  18   3    4.30    2.50
   4  18  -2  139.80    7.10
   4  18  -2  133.90    6.90
  -4  18   2  142.50    9.50
  -4  18   2  131.80    6.50
   4  18  -1    7.40    4.30
   4  18  -1    5.80    3.10
  -4  18   1    8.50    2.70
  -4  18   1    3.20    2.40
   4  18   0   43.60    4.10
   4  18   0   42.90    3.90
  -4  18   0   42.30    3.70
  -4  18   0   42.10    3.70
   4  18   1    1.50    3.00
   4  18   1    0.30    2.60
  -4  18  -1    3.60    2.60
  -4  18  -1    8.10    2.60
   4  18   2   98.40    5.90
   4  18   2   83.30    5.20
  -4  18  -2   89.70    4.90
  -4  18  -2   79.30    5.00
   4  18   3    0.10    3.70
   4  18   3    3.10    2.70
  -4  18  -3   -1.50    3.40
  -4  18  -3    7.80    3.30
   4  18   4   38.60    3.70
  -4  18  -4   48.50    4.50
  -4  18  -4   41.10    4.00
  -4 -18  -4   48.80    3.80
   4  18   5   11.00    3.50
  -4  18  -5   11.00    2.90
  -4  18  -5    7.10    2.60
  -4 -18  -5   11.50    3.20
   4  18   6   48.50    4.60
  -4  18  -6   61.00    4.80
  -4  18  -6   59.20    4.90
  -4 -18  -6   65.30    4.60
  -4  18  -7   -0.60    2.80
  -4  18  -7   -1.00    2.80
  -4  18  -8   19.00    3.60
  -4  18  -9   -2.00    3.00
  -4 -18  -9    2.10    3.30
  -4  18 -10  102.90    6.20
  -4 -18 -10  101.20    5.70
  -4  18 -11   -5.10    3.40
  -4 -18 -11    6.10    3.50
  -4  18 -12   18.50    4.60
  -4 -18 -12   21.70    4.20
  -4  18 -13   -0.60    3.70
  -4 -18 -13    2.70    4.00
  -4  18 -14   72.50    5.40
  -4 -18 -14   71.30    5.10
  -4 -18 -15    0.70    3.50
  -4  18 -16   13.70    3.00
  -4 -18 -16   10.20    3.70
  -4  18 -17   -2.00    4.20
  -4 -18 -17   18.90   10.60
  -4  18 -18   37.30    5.10
  -4 -18 -18   37.20    5.50
  -4  18 -19    3.70    4.60
  -4 -18 -19    2.00    3.30
  -4 -18 -20    8.60    4.20
  -4 -18 -21    2.90    3.60
   4 -20 -24    0.20    2.80
   4 -20 -23   18.90    3.80
   4 -20 -22    7.10    3.50
   4  20 -21    0.70    3.10
   4 -20 -21    6.70    4.70
   4  20 -20    7.80    4.30
   4 -20 -20   16.30    4.30
   4  20 -19   32.20    5.00
   4 -20 -19   37.00    4.40
   4  20 -18   -3.40    3.40
   4 -20 -18   -2.30    4.20
   4  20 -17    2.90    3.30
   4 -20 -17    6.60    3.90
   4  20 -16   17.70    4.00
   4 -20 -16   10.90    3.70
   4  20 -15   64.00    6.50
  -4  20  15   63.90    5.30
   4  20 -14   33.00    4.60
  -4  20  14   34.80    4.70
   4  20 -13   12.40    4.40
  -4  20  13    9.70    3.40
   4  20 -12   16.20    4.30
  -4  20  12   21.30    3.70
  -4  20  12   10.70    3.30
   4  20 -11   37.60    4.50
  -4  20  11   39.40    4.90
  -4  20  11   31.20    3.90
   4  20 -10   21.80    3.70
  -4  20  10   22.10    3.30
  -4  20  10   16.50    3.40
   4  20  -9   15.40    4.60
  -4  20   9    7.70    3.50
  -4  20   9    6.80    3.60
   4  20  -8   37.50    4.30
  -4  20   8   43.10    4.30
  -4  20   8   37.30    3.90
   4  20  -7   31.60    4.10
  -4  20   7   29.00    4.10
  -4  20   7   24.90    3.40
   4  20  -6   15.00    3.70
  -4  20   6   10.80    3.30
  -4  20   6   12.20    2.90
   4  20  -5    5.70    4.00
  -4  20   5    4.70    3.00
  -4  20   5    5.60    3.20
   4  20  -4   17.70    3.90
  -4  20   4   12.30    3.50
  -4  20   4   25.70    5.00
   4  20  -3   51.60    4.90
  -4  20   3   51.90    4.10
  -4  20   3   50.10    4.50
   4  20  -2   35.80    4.00
  -4  20   2   36.60    3.70
  -4  20   2   29.30    3.60
   4  20  -1   27.10    4.40
  -4  20   1   27.00    3.60
  -4  20   1   18.50    3.40
   4  20   0   11.10    4.10
  -4  20   0    6.40    3.20
  -4  20   0   -1.10    2.70
   4  20   1   16.30    3.70
  -4  20  -1   13.00    2.90
  -4  20  -1    0.20    3.50
  -4  20  -2   57.00    4.40
  -4  20  -3   20.00    4.50
   4  20   4   23.90    3.90
  -4  20  -4   25.00    3.90
   4  20   5   27.90    4.90
  -4  20  -5   22.30    3.20
  -4  20  -6   14.90    3.40
  -4  20  -7   22.00    3.70
  -4  20  -8   60.20    5.00
  -4 -20  -8   64.20    6.00
  -4 -20  -9    7.10    3.40
  -4  20 -10   13.00    2.80
  -4 -20 -10    6.10    3.70
  -4  20 -11   37.70    4.10
  -4 -20 -11   38.30    4.80
  -4  20 -12   48.70    4.90
  -4 -20 -12   38.20    4.20
  -4  20 -13    6.10    4.10
  -4 -20 -13    2.20    3.40
  -4  20 -14   13.90    5.00
  -4 -20 -14   14.70    4.10
  -4  20 -15    8.00    4.00
  -4 -20 -15   16.90    4.80
  -4  20 -16   26.70    4.20
  -4 -20 -16   31.70    4.70
  -4  20 -17    2.30    4.40
  -4 -20 -17    1.60    3.70
  -4 -20 -18   26.10    7.40
   4 -22 -22    3.60    5.40
   4 -22 -21   10.00    3.20
   4 -22 -20   -3.30    3.00
  -4  22  19   23.80    4.40
  -4  22  18    0.50    3.80
  -4  22  17   30.00    4.20
   4  22 -16    0.50    4.80
  -4  22  16    5.30    3.70
   4  22 -15   27.00    4.50
  -4  22  15   24.80    4.70
   4  22 -14   -0.10    3.90
  -4  22  14   -3.00    3.20
   4  22 -13   41.00    5.30
  -4  22  13   38.30    4.90
   4  22 -12    4.10    4.00
  -4  22  12    7.00    4.50
   4  22 -11   30.20    6.40
  -4  22  11   30.20    5.40
   4  22 -10   12.50    4.30
  -4  22  10    8.30    3.60
   4  22  -9   39.40    5.40
  -4  22   9   38.10    4.80
   4  22  -8   23.30    4.00
  -4  22   8   15.80    3.80
   4  22  -7   24.30    4.50
  -4  22   7   28.60    3.70
   4  22  -6   14.20    4.10
  -4  22   6    9.60    4.20
   4  22  -5   54.80    5.10
  -4  22   5   45.70    4.90
   4  22  -4   14.60    4.10
  -4  22   4   11.00    3.30
   4  22  -3   37.90    4.80
  -4  22   3   37.90    4.20
   4  22  -2    1.90    4.30
  -4  22   2    9.90    3.80
   4  22  -1   58.10    4.90
  -4  22   1   53.70    4.80
  -4  22   0    2.40    3.20
  -4  22  -1   22.30    3.30
   4  22   2    7.00    3.60
   4  22   3   48.10    4.90
  -4  22  -5   10.30    3.80
  -4  22  -6    0.30    3.10
  -4  22  -7   13.80    4.40
  -4  22  -8   11.40    3.70
  -4 -22  -8   16.30    5.00
  -4 -22  -9   21.90    4.90
  -4  22 -10    2.50    3.40
  -4 -22 -10   -1.10    3.70
  -4  22 -11   30.10    5.80
  -4 -22 -11   32.50    5.30
  -4  22 -12   16.00    5.30
  -4 -22 -12   11.40    4.00
  -4  22 -13   18.50    4.50
  -4 -22 -13    2.40    4.20
  -4 -22 -14   -0.90    3.80
  -4  24  18    7.90    3.60
  -4  24  17   23.20    5.80
  -4  24  16   20.40    5.80
  -4  24  15    8.20    4.40
  -4  24  14    2.50    3.70
  -4  24  13    7.30    3.90
  -4  24  12   17.10    4.60
  -4  24  11    5.40    3.20
   4  24 -10    4.40    4.10
  -4  24  10    9.50    3.50
   4  24  -9    7.90    4.10
  -4  24   9   24.90    4.00
   4  24  -8   -0.30    2.40
  -4  24   8    1.20    3.30
  -4  24   7    7.00    4.00
   4  24  -6   21.00    4.70
  -4  24   6   17.80    4.80
   4  24  -5   27.80    4.80
  -4  24   5   29.80    4.10
   4  24  -4   11.80    4.00
  -4  24   4   15.20    3.90
  -4  24   3   20.80    4.70
  -4  24   2    5.20    4.10
   4  24  -1   14.60    4.00
  -4  24  -2   -1.20    4.00
  -4  24  -5   18.40    4.10
   4  24   6    9.30    4.90
  -4  24  -6   13.30    3.90
   4  24   7    6.90    4.50
  -4  26   9   -6.70    4.00
  -4  26   8   21.70    4.10
  -4  26   7   -2.90    3.50
  -4  26   6   20.00    5.10
  -4  26   5    2.80    3.90
  -4  26   4   31.90    4.50
  -4  26   3    6.10    4.10
  -4  26   2   10.40    5.60
  -4  26   1    3.60    5.00
   5   1 -36    3.30    4.70
   5  -1 -36    2.30    4.10
   5   1 -35    2.20    3.40
   5  -1 -35    0.30    4.30
   5   1 -34   30.50    4.30
   5  -1 -34   28.20    4.70
   5   1 -33    3.10    4.40
   5  -1 -33    6.90    6.40
   5   1 -32   32.90    4.60
   5  -1 -32   40.60    5.20
   5   1 -31    4.10    3.50
   5  -1 -31    4.40    3.20
   5   1 -30   34.10    3.90
   5  -1 -30   33.20    3.40
   5  -1 -30   32.70    4.50
   5   1 -29    0.40    3.50
   5   1 -29    3.40    2.90
  -5   1  29    5.30    3.60
  -5  -1  29   -2.00    4.10
   5  -1 -29   -0.80    2.50
   5  -1 -29    3.30    4.10
   5   1 -28   21.90    3.30
   5   1 -28   21.10    4.90
  -5   1  28   23.50    3.80
  -5  -1  28   28.50    3.90
   5  -1 -28   25.80    3.10
   5  -1 -28   29.90    4.90
   5   1 -27   27.20    3.30
   5   1 -27  119.90   25.60
  -5   1  27   27.50    4.10
  -5  -1  27   27.30    3.90
   5  -1 -27   26.80    3.40
   5  -1 -27   25.30    5.80
   5   1 -26   69.90    4.30
   5   1 -26  112.00   14.40
  -5   1  26   64.70    4.30
  -5  -1  26   63.10    6.20
   5  -1 -26   62.90    4.10
   5  -1 -26   69.20    7.10
   5   1 -25    8.80    4.00
   5   1 -25   13.70    4.60
  -5   1  25    9.90    2.70
  -5  -1  25    8.50    2.50
   5  -1 -25   14.00    3.60
   5  -1 -25    7.40    4.50
   5   1 -24   64.20    4.10
   5   1 -24   67.70    5.10
  -5   1  24   70.40    4.40
  -5  -1  24   63.20    4.10
  -5  -1  24   60.70    4.60
   5  -1 -24   67.50    4.10
   5  -1 -24   64.40    4.60
   5   1 -23   -0.90    2.10
   5   1 -23    3.40    3.50
  -5   1  23    0.20    2.60
  -5  -1  23   -3.70    2.80
  -5  -1  23   -0.30    3.10
   5  -1 -23    0.90    2.20
   5  -1 -23   -0.80    3.10
   5   1 -22   65.00    4.50
  -5   1  22   64.70    4.70
  -5  -1  22   71.20    4.30
  -5  -1  22   64.60    4.60
   5  -1 -22   68.40    4.50
   5  -1 -22   69.60    7.80
   5   1 -21    8.10    2.70
  -5   1  21    5.30    2.50
  -5  -1  21    6.90    2.00
  -5  -1  21    8.60    2.70
   5  -1 -21   10.80    2.60
   5  -1 -21    6.80    3.40
   5   1 -20  107.70    5.70
  -5   1  20  109.30    5.40
  -5  -1  20  109.80    5.20
  -5  -1  20  106.80    6.60
   5  -1 -20  102.70    5.30
   5  -1 -20  109.70    6.20
   5   1 -19   -0.80    2.80
  -5   1  19    2.50    2.30
  -5  -1  19   -3.20    2.20
  -5  -1  19    1.80    2.90
   5  -1 -19    0.90    2.30
   5  -1 -19    2.20    3.40
   5  -1 -19    2.10    3.30
   5   1 -18  197.50    8.10
   5   1 -18  191.90    9.00
  -5   1  18  202.80    8.40
  -5   1  18  203.90    9.70
  -5  -1  18  207.90    8.10
  -5  -1  18  198.50    8.40
   5  -1 -18  197.90    8.20
   5  -1 -18  188.00   10.40
   5  -1 -18  211.30   10.20
   5   1 -17   27.00    3.20
  -5   1  17   22.90    2.00
  -5   1  17   24.60    2.60
  -5  -1  17   25.70    2.20
  -5  -1  17   22.70    2.90
   5  -1 -17   25.30    2.10
   5  -1 -17   26.00    3.00
   5  -1 -17   31.10    4.80
   5   1 -16  176.50    7.30
   5   1 -16  178.00    7.90
  -5   1  16  178.80    7.80
  -5   1  16  181.70    8.20
  -5  -1  16  187.10    7.70
  -5  -1  16  183.70    7.90
   5  -1 -16  173.10    7.20
   5  -1 -16  192.40    9.60
   5  -1 -16  180.80    8.90
   5   1 -15   26.50    2.20
   5   1 -15   26.50    2.80
  -5   1  15   24.20    2.10
  -5   1  15   23.60    2.50
  -5  -1  15   25.00    2.00
  -5  -1  15   26.60    2.90
   5  -1 -15   24.00    1.80
   5  -1 -15   25.20    2.80
   5  -1 -15   25.50    3.60
   5   1 -14  260.50   10.00
   5   1 -14  255.90   11.00
  -5   1  14  259.90    9.90
  -5   1  14  244.10   10.50
  -5  -1  14  265.40   10.50
  -5  -1  14  254.60   10.70
   5  -1 -14  267.70   12.50
   5  -1 -14  263.30   11.50
   5   1 -13    8.10    1.50
   5   1 -13    7.00    2.20
  -5   1  13    6.20    1.40
  -5   1  13    8.90    2.20
  -5  -1  13    7.70    1.40
  -5  -1  13    7.40    2.10
   5  -1 -13    7.20    1.90
   5  -1 -13    7.90    2.10
   5   1 -12  218.80    8.70
   5   1 -12  220.40    9.10
  -5   1  12  205.90    8.30
  -5  -1  12  217.30    8.70
  -5  -1  12  216.70   11.00
   5  -1 -12  210.90   10.00
   5  -1 -12  227.80    9.60
   5   1 -11    1.00    0.90
   5   1 -11    1.30    2.00
   5   1 -11    2.40    1.70
  -5   1  11   -1.20    0.90
  -5  -1  11    3.70    2.20
  -5  -1  11   -1.10    2.70
   5  -1 -11   -0.80    1.80
   5  -1 -11    1.40    1.80
   5   1 -10  326.00   12.10
   5   1 -10  328.50   15.40
   5   1 -10  319.30   12.80
  -5   1  10  318.50   11.80
  -5  -1  10  317.20   11.90
  -5  -1  10  308.60   12.60
   5  -1 -10  327.80   14.00
   5  -1 -10  314.60   13.50
   5   1  -9  320.80   12.10
   5   1  -9  333.00   15.20
  -5   1   9  326.10   12.20
  -5  -1   9  329.10   12.20
  -5  -1   9  316.30   12.80
   5  -1  -9  331.60   14.30
   5  -1  -9  348.70   14.30
   5   1  -8  198.30    7.80
   5   1  -8  212.50    9.80
  -5   1   8  202.10    7.60
  -5  -1   8  200.00    8.10
  -5  -1   8  196.50    8.30
   5  -1  -8  212.90    9.60
   5  -1  -8  217.70    9.50
   5   1  -7   17.10    1.10
   5   1  -7   20.50    2.90
  -5  -1   7   16.70    1.20
  -5  -1   7   15.80    2.30
   5  -1  -7   17.40    3.20
   5  -1  -7   17.40    2.70
   5   1  -6  310.80   11.20
   5   1  -6  330.60   13.20
  -5   1   6  311.20   12.50
  -5   1   6  312.40   12.40
  -5  -1   6  315.70   11.40
  -5  -1   6  321.20   12.30
   5  -1  -6  316.20   12.80
   5  -1  -6  304.20   13.00
   5   1  -5  231.80    8.80
   5   1  -5  238.20    9.00
   5   1  -5  280.40   10.90
  -5   1   5  237.50   10.00
  -5   1   5  257.30   10.60
   5  -1  -5  268.00   11.20
   5  -1  -5  230.60   10.40
   5   1  -4  137.10    5.70
   5   1  -4  181.80    7.80
  -5   1   4  151.40    5.00
  -5   1   4  155.40    6.70
  -5   1   4  158.70    6.90
  -5  -1   4  142.70    5.60
   5  -1  -4  157.40    5.30
   5  -1  -4  168.80    7.10
   5  -1  -4  146.50    7.10
   5   1  -3  331.70   12.00
  -5   1   3  334.90   11.50
  -5   1   3  363.60   13.60
  -5   1   3  328.30   12.70
  -5  -1   3  322.80   11.90
   5  -1  -3  327.90   11.90
   5  -1  -3  369.60   14.00
   5   1  -2  808.80   26.80
  -5   1   2  785.70   26.90
  -5   1   2  804.20   28.70
  -5   1   2  818.00   28.70
  -5  -1   2  770.00   26.10
   5  -1  -2  744.10   27.00
   5  -1  -2  797.00   30.40
   5   1  -1  480.80   16.80
   5   1  -1  467.80   18.30
  -5   1   1  463.10   17.80
  -5  -1   1  459.80   15.90
   5  -1  -1  440.90   16.60
   5  -1  -1  451.40   18.20
   5   1   0    3.70    1.20
  -5   1   0    1.50    1.10
  -5  -1   0    3.90    0.80
   5  -1   0    3.20    0.80
   5  -1   0    4.00    1.10
   5   1   1   43.80    2.30
   5   1   1   46.00    3.00
  -5   1  -1   46.10    2.60
  -5  -1  -1   45.40    2.30
  -5  -1  -1   45.90    2.50
   5  -1   1   44.60    2.50
   5  -1   1   45.60    2.80
   5   1   2  147.70    6.00
  -5   1  -2  153.20    6.70
  -5  -1  -2  152.50    6.00
  -5  -1  -2  158.00    6.50
   5  -1   2  153.20    6.60
   5  -1   2  150.40    6.50
   5   1   3   71.00    3.60
  -5  -1  -3   72.30    3.60
  -5  -1  -3   72.90    3.40
   5  -1   3   71.50    3.60
   5  -1   3   71.60    3.50
   5   1   4  238.40    9.10
  -5  -1  -4  241.50    9.70
  -5  -1  -4  236.80    8.80
   5  -1   4  247.60    9.20
   5  -1   4  229.10    9.30
   5   1   5   17.90    1.50
  -5  -1  -5   15.50    1.40
  -5  -1  -5   15.60    1.10
   5  -1   5   16.60    1.70
   5  -1   5   15.40    1.40
   5   1   6   24.50    1.80
  -5  -1  -6   25.60    1.90
   5  -1   6   27.70    1.90
   5  -1   6   26.30    1.60
   5   1   7   19.00    1.70
  -5  -1  -7   14.80    1.70
   5  -1   7   14.80    2.00
   5  -1   7   15.70    1.20
   5   1   8  346.20   12.90
  -5  -1  -8  331.70   12.90
   5  -1   8  340.40   13.30
   5  -1   8  342.10   11.70
   5   1   9   24.20    2.50
  -5  -1  -9   29.20    2.30
   5  -1   9   27.00    2.20
   5   1  10   56.80    3.50
  -5  -1 -10   53.00    3.40
   5  -1  10   57.80    3.20
   5   1  11   99.20    4.90
  -5  -1 -11   92.90    5.10
   5  -1  11   98.60    4.30
   5   1  12  154.70    6.30
  -5  -1 -12  154.30    7.10
   5  -1  12  158.30    6.40
   5   1  13   -0.20    1.90
  -5   1 -13    5.00    2.20
  -5  -1 -13    0.70    2.20
   5  -1  13    3.00    2.40
   5   1  14  142.80    7.10
  -5   1 -14  138.90    6.00
  -5  -1 -14  131.80    6.40
   5  -1  14  141.50    6.30
   5   1  15   38.40    3.40
  -5   1 -15   34.60    3.30
  -5  -1 -15   40.90    3.40
   5  -1  15   36.90    3.10
   5   1  16  108.60    5.80
  -5   1 -16  109.60    5.90
  -5  -1 -16  113.20    5.80
   5  -1  16  118.50    5.90
   5   1  17    5.00    2.80
  -5   1 -17    2.70    2.90
  -5  -1 -17    4.90    3.00
   5  -1  17    3.50    2.50
   5   1  18   27.90    3.30
  -5   1 -18   17.90    3.20
  -5  -1 -18   18.80    2.90
   5  -1  18   23.30    3.20
   5   1  19   -2.00    3.00
  -5   1 -19   -3.00    2.70
  -5  -1 -19    1.20    2.80
   5  -1  19   -0.30    3.50
   5   1  20  134.50    7.10
  -5   1 -20  145.90   14.80
  -5  -1 -20  146.30    7.40
   5  -1  20  131.30    6.70
   5   1  21   36.50    4.50
  -5   1 -21   52.30    4.10
  -5  -1 -21   41.20    4.00
   5  -1  21   33.00    4.40
  -5   1 -22   30.10    4.00
  -5  -1 -22   29.00    4.30
  -5   1 -23    1.30    3.40
  -5  -1 -23    3.10    3.90
  -5   1 -24   55.50    5.20
  -5  -1 -24   60.30    5.40
  -5   1 -25    8.80    3.80
  -5  -1 -25   13.10    4.40
  -5   1 -26   23.90    4.20
  -5  -1 -26   26.90    5.00
  -5   1 -27   -1.90    3.40
  -5  -1 -27   -4.00    4.00
  -5   1 -28   33.00    5.30
  -5  -1 -28   38.50    5.00
  -5  -1 -29   12.80    4.60
   5  -3 -36    1.10    2.10
   5   3 -35   16.80    4.90
   5  -3 -35   11.20    4.00
   5   3 -34    4.40    3.70
   5  -3 -34    3.80    4.20
   5   3 -33   32.50    5.40
   5  -3 -33   51.60    8.20
   5   3 -32    6.60    3.30
   5  -3 -32   -3.80    4.90
   5   3 -31   10.10    4.50
   5  -3 -31    8.40    4.40
   5  -3 -31    2.70    5.50
   5   3 -30    3.20    2.90
   5  -3 -30    0.50    3.00
   5  -3 -30    5.10    5.00
   5   3 -29   93.90    5.70
  -5   3  29   83.30    6.00
  -5  -3  29   77.30    5.80
   5  -3 -29   82.80    5.30
   5  -3 -29   92.80    7.10
   5   3 -28   48.50    3.90
  -5   3  28   50.80    7.10
  -5  -3  28   36.40    4.70
  -5  -3  28   45.10    4.60
   5  -3 -28   34.50    4.10
   5  -3 -28   42.90    5.70
   5   3 -27   34.30    4.10
  -5   3  27   29.20    3.90
  -5  -3  27   40.70    4.30
  -5  -3  27   34.00    5.10
   5  -3 -27   30.70    3.50
   5  -3 -27   26.60    4.60
   5   3 -26   11.10    3.00
  -5   3  26    6.00    3.70
  -5  -3  26   14.10    3.00
  -5  -3  26   11.70    3.20
   5  -3 -26   12.00    2.80
   5  -3 -26   14.90    4.40
   5   3 -25  109.20    5.50
  -5   3  25  105.60    5.60
  -5  -3  25  110.20    6.00
  -5  -3  25  110.60    5.90
   5  -3 -25  105.20    5.70
   5  -3 -25  109.30    8.00
   5   3 -24   15.30    2.70
  -5   3  24   12.10    2.70
  -5  -3  24   16.50    3.00
  -5  -3  24   11.90    4.80
   5  -3 -24   10.30    2.60
   5  -3 -24   11.20    4.40
   5   3 -23   14.90    2.70
  -5   3  23   20.30    3.20
  -5  -3  23   17.30    2.50
  -5  -3  23   17.40    4.00
   5  -3 -23   21.20    3.30
   5  -3 -23   16.60    4.10
   5  -3 -23   12.80    3.60
   5   3 -22   38.50    3.20
  -5   3  22   31.90    3.10
  -5  -3  22   36.60    3.30
  -5  -3  22   36.20    4.50
   5  -3 -22   36.50    2.90
   5  -3 -22   61.30    9.10
   5   3 -21  113.00    8.10
  -5   3  21  142.10   11.40
  -5  -3  21  106.20    5.60
  -5  -3  21  113.60    6.30
   5  -3 -21  104.30    5.10
   5  -3 -21  106.80    6.50
   5   3 -20   42.70    3.20
  -5   3  20   45.90    3.10
  -5  -3  20   47.40    3.50
  -5  -3  20   44.20    3.90
   5  -3 -20   56.20    6.60
   5  -3 -20   43.80    4.40
   5   3 -19   75.20    4.10
  -5   3  19   84.70    4.10
  -5  -3  19   80.40    4.00
  -5  -3  19   80.90    5.10
   5  -3 -19   75.00    3.70
   5  -3 -19   81.70    5.50
   5   3 -18    4.20    2.00
  -5   3  18    7.40    1.90
  -5  -3  18    6.00    2.10
   5  -3 -18    7.70    1.60
   5  -3 -18    6.70    2.50
   5   3 -17  107.70    5.60
  -5   3  17  108.50    4.80
  -5  -3  17  112.60    5.00
   5  -3 -17  101.30    6.10
   5   3 -16   19.20    2.10
  -5   3  16   20.70    2.00
  -5  -3  16   20.80    2.00
  -5  -3  16   19.00    2.90
   5  -3 -16   21.10    2.50
   5   3 -15   35.80    2.30
  -5   3  15   38.10    2.30
  -5  -3  15   40.20    2.70
  -5  -3  15   38.30    3.30
   5  -3 -15   35.10    2.20
   5  -3 -15   38.60    3.20
   5   3 -14   50.70    2.70
  -5   3  14   57.00    2.90
  -5  -3  14   55.10    3.20
  -5  -3  14   58.00    4.40
   5  -3 -14   56.70    2.80
   5  -3 -14   60.40    4.20
   5   3 -13  240.60    9.40
  -5   3  13  247.60    9.60
  -5  -3  13  236.60    9.60
  -5  -3  13  239.00   10.30
   5  -3 -13  229.60    8.60
   5  -3 -13  224.20   10.10
   5   3 -12   37.00    2.30
  -5   3  12   39.00    2.20
  -5  -3  12   33.80    2.20
  -5  -3  12   34.60    2.80
   5  -3 -12   36.30    1.80
   5  -3 -12   37.70    8.80
   5   3 -11  242.80    9.30
  -5   3  11  231.10    9.10
  -5  -3  11  236.70    9.30
  -5  -3  11  240.50   11.40
  -5  -3  11  254.80    9.40
   5  -3 -11  232.40    8.70
   5  -3 -11  235.30   10.20
   5   3 -10    4.20    1.20
  -5   3  10    4.00    1.10
  -5  -3  10    3.30    1.40
  -5  -3  10    2.10    1.70
   5  -3 -10    4.20    0.90
   5  -3 -10    2.60    1.90
   5   3  -9  373.40   14.10
  -5   3   9  377.30   13.70
  -5  -3   9  381.60   13.80
  -5  -3   9  379.50   16.10
   5  -3  -9  352.80   13.00
   5  -3  -9  381.30   16.30
   5   3  -8  166.90    6.90
  -5   3   8  171.20    6.50
  -5  -3   8  173.40    6.90
  -5  -3   8  175.70    8.90
   5  -3  -8  160.80    6.00
   5  -3  -8  173.80    8.30
   5   3  -7  123.30    5.00
  -5   3   7  131.20    4.70
  -5  -3   7  123.90    5.20
  -5  -3   7  134.40    6.60
   5  -3  -7  115.30    4.50
   5  -3  -7  133.70    6.50
   5   3  -6   38.50    2.50
   5   3  -6   43.70    2.70
  -5   3   6   48.60    1.80
  -5  -3   6   41.90    3.30
   5  -3  -6   44.60    2.00
   5  -3  -6   44.60    4.50
   5   3  -5 1036.00   35.50
   5   3  -5 1051.60   35.00
  -5   3   5 1050.50   34.40
  -5   3   5 1033.30   33.70
   5  -3  -5 1101.00   40.60
   5   3  -4    9.80    1.30
  -5   3   4    5.70    0.70
  -5  -3   4    5.20    1.20
   5  -3  -4    7.00    2.00
   5   3  -3   83.10    3.70
  -5   3   3   86.90    3.50
  -5  -3   3   88.00    3.70
   5  -3  -3   85.00    3.50
   5  -3  -3   91.90    4.50
   5   3  -2  118.00    4.80
  -5   3   2  114.90    4.80
  -5  -3   2  117.50    5.00
   5  -3  -2  112.40    4.60
   5  -3  -2  111.90    5.20
   5   3  -1  462.80   16.60
  -5   3   1  452.50   16.60
  -5  -3   1  457.20   16.40
   5  -3  -1  464.90   16.80
   5  -3  -1  453.10   17.00
   5   3   0  423.60   15.90
  -5   3   0  426.60   15.10
  -5   3   0  430.40   16.40
  -5  -3   0  438.60   15.60
   5  -3   0  426.90   15.80
   5  -3   0  416.90   15.90
   5   3   1  121.20    5.40
  -5   3  -1  118.90    5.00
  -5   3  -1  120.10    5.30
  -5  -3  -1  122.40    5.00
   5  -3   1  121.00    5.20
   5   3   2   18.00    1.50
  -5   3  -2   16.70    1.90
  -5   3  -2   19.30    2.10
  -5  -3  -2   18.50    1.70
   5  -3   2   17.20    1.70
   5   3   3  803.90   27.10
  -5   3  -3  798.80   28.90
  -5  -3  -3  783.10   28.20
   5  -3   3  807.80   28.80
   5   3   4    3.80    1.30
  -5   3  -4    6.70    1.10
  -5  -3  -4    5.20    1.20
   5  -3   4    6.80    1.50
   5   3   5    4.50    1.40
  -5   3  -5    4.60    1.40
  -5  -3  -5    4.30    1.30
   5  -3   5    4.70    1.40
   5   3   6  167.30    6.80
  -5   3  -6  158.20    6.70
  -5  -3  -6  158.80    6.30
   5  -3   6  165.50    6.90
   5   3   7  384.70   13.50
  -5  -3  -7  358.80   13.60
   5  -3   7  358.00   13.60
   5   3   8  223.30    9.10
  -5  -3  -8  239.50    8.80
   5  -3   8  230.80    8.90
   5   3   9  127.40    5.90
  -5   3  -9  121.50    5.80
  -5  -3  -9  142.00    4.70
   5  -3   9  130.70    5.70
   5   3  10    6.90    1.80
  -5   3 -10    1.20    1.80
  -5  -3 -10    9.20    1.90
   5  -3  10    5.20    2.20
   5   3  11  270.40   10.00
  -5   3 -11  250.20   10.70
  -5  -3 -11  258.60   10.10
   5  -3  11  266.40   10.90
   5   3  12    0.00    2.40
  -5  -3 -12   -0.50    2.00
   5  -3  12   -0.10    1.90
   5   3  13   93.70    4.90
  -5  -3 -13   90.20    4.60
   5  -3  13   96.00    5.10
   5   3  14  198.20    9.10
  -5   3 -14  194.40    8.70
  -5  -3 -14  188.00    7.80
   5  -3  14  196.50    7.80
   5  -3  14  187.10    7.50
   5   3  15   96.40    4.70
  -5   3 -15   86.90    4.70
  -5  -3 -15   86.60    4.70
   5  -3  15   92.30    5.30
   5  -3  15   88.30    3.50
   5   3  16    8.20    2.60
  -5   3 -16    3.40    2.70
  -5  -3 -16    5.50    2.60
   5  -3  16    6.10    2.60
   5   3  17   88.60    5.10
  -5   3 -17  100.10    5.60
  -5  -3 -17   87.60    5.30
   5  -3  17   96.00    5.00
   5   3  18   33.20    3.80
  -5   3 -18   32.20    3.70
  -5  -3 -18   33.10    3.70
   5  -3  18   32.70    3.40
   5   3  19   40.90    3.80
  -5   3 -19   49.50    4.00
  -5   3 -19   46.60    2.90
  -5  -3 -19   47.10    4.10
   5  -3  19   50.60    4.20
   5   3  20    6.00    3.40
  -5   3 -20   70.30   19.20
  -5   3 -20    7.00    2.30
  -5  -3 -20    5.60    3.20
   5  -3  20    5.30    3.10
  -5   3 -21   61.40    4.60
  -5   3 -21   55.50    3.10
  -5  -3 -21   59.80    4.70
  -5   3 -22   23.30    4.00
  -5   3 -22   28.40    4.80
  -5  -3 -22   22.50    3.50
  -5   3 -23   26.10    4.10
  -5  -3 -23   31.00    4.20
  -5   3 -24    4.30    3.50
  -5  -3 -24   19.00    6.80
  -5   3 -25   23.70    4.10
  -5  -3 -25   22.30    4.40
  -5   3 -26   14.00    4.00
  -5  -3 -26   22.60    6.00
  -5   3 -27   39.80    6.00
  -5  -3 -27   36.90    4.90
  -5   3 -28    1.70    4.40
  -5  -3 -28   -2.50    4.50
   5   5 -35   10.30    4.80
   5  -5 -35    9.40    3.60
   5   5 -34   -2.60    3.90
   5  -5 -34   -0.80    3.50
   5   5 -33   19.20    5.10
   5  -5 -33   15.50    4.20
   5   5 -32    6.60    4.70
   5  -5 -32   -3.30    3.30
   5   5 -31   30.10    4.40
   5  -5 -31   28.90    4.60
   5   5 -30    4.90    3.20
  -5  -5  30   14.00    5.80
   5  -5 -30   12.40    3.40
   5   5 -29   25.90    3.90
  -5   5  29   17.50    3.80
  -5  -5  29   25.20    4.10
   5  -5 -29   23.00    3.50
   5  -5 -29   12.40    5.40
   5   5 -28   -4.60    2.70
  -5   5  28   -3.50    2.40
  -5  -5  28   -0.80    3.10
   5  -5 -28    4.60    3.20
   5  -5 -28    0.50    5.30
   5   5 -27   74.80    4.80
  -5   5  27   70.20    4.90
  -5  -5  27   66.90    5.10
  -5  -5  27   78.70    5.60
   5  -5 -27   70.00    4.70
   5   5 -26   -2.50    2.80
  -5   5  26   -3.90    3.20
  -5  -5  26    1.70    4.10
  -5  -5  26   -1.00    3.20
   5  -5 -26   -4.40    2.30
   5  -5 -26   -0.60    3.40
   5   5 -25   66.80    4.50
  -5   5  25   59.80    4.30
  -5  -5  25   65.20    4.80
  -5  -5  25   58.80    4.80
   5  -5 -25   67.00    4.20
   5  -5 -25   63.10    5.20
   5   5 -24   -1.20    3.10
  -5   5  24    1.30    2.70
  -5  -5  24   -4.20    3.00
  -5  -5  24   -3.70    4.50
   5  -5 -24   -1.50    2.50
   5  -5 -24    0.60    2.70
   5   5 -23   67.50    4.10
  -5   5  23   66.30    3.70
  -5  -5  23   74.80    4.70
  -5  -5  23   70.60    5.50
   5  -5 -23   69.20    4.50
   5  -5 -23   65.50    4.70
   5   5 -22    2.20    2.60
  -5   5  22    9.30    2.90
  -5  -5  22    3.60    2.30
  -5  -5  22    3.70    3.40
   5  -5 -22    7.40    2.40
   5  -5 -22    8.50    4.30
   5   5 -21  182.40    7.80
  -5   5  21  169.40    7.40
  -5  -5  21  174.50    7.70
  -5  -5  21  178.90   10.10
   5  -5 -21  187.10    7.80
   5  -5 -21  178.90    9.70
   5   5 -20   11.10    2.50
  -5   5  20    8.90    2.50
  -5  -5  20    9.40    2.30
  -5  -5  20    6.50    2.70
   5  -5 -20    6.70    1.80
   5  -5 -20    6.40    2.40
   5   5 -19   89.70    4.50
  -5   5  19   95.90    4.80
  -5  -5  19   96.10    4.70
  -5  -5  19   88.90    5.10
   5  -5 -19   97.00    4.80
   5  -5 -19   91.50    4.90
   5   5 -18   10.30    2.10
  -5   5  18   10.20    2.10
  -5  -5  18    8.30    2.40
  -5  -5  18    9.00    2.60
   5  -5 -18    9.90    2.30
   5  -5 -18   10.70    2.30
   5   5 -17  182.60    7.50
  -5   5  17  199.60    7.90
  -5  -5  17  196.60    7.70
  -5  -5  17  187.80    8.90
   5  -5 -17  182.80    7.60
   5  -5 -17  192.40    9.10
   5   5 -16    1.50    1.90
  -5   5  16    3.40    1.30
  -5  -5  16    2.00    1.60
  -5  -5  16    4.60    2.50
   5  -5 -16    3.50    1.60
   5  -5 -16    3.30    1.90
   5   5 -15  257.40   10.20
  -5   5  15  257.70    9.60
  -5  -5  15  255.00    9.90
  -5  -5  15  258.40   12.20
  -5  -5  15  260.70   10.00
   5  -5 -15  246.40    9.70
   5  -5 -15  247.70   11.30
   5   5 -14   48.00    2.90
  -5   5  14   49.20    2.60
  -5  -5  14   48.10    2.80
  -5  -5  14   43.00    3.60
  -5  -5  14   50.00    3.40
   5  -5 -14   47.20    2.60
   5  -5 -14   48.60    3.40
   5   5 -13  106.30    5.10
  -5   5  13  102.40    4.50
  -5  -5  13  115.60    5.10
  -5  -5  13  108.70    6.50
  -5  -5  13  105.40    5.20
   5  -5 -13  104.00    4.70
   5  -5 -13  111.20    6.30
   5   5 -12   57.30    4.30
  -5   5  12   48.20    2.50
  -5  -5  12   51.30    2.90
  -5  -5  12   49.60    3.50
   5  -5 -12   47.80    2.60
   5  -5 -12   48.70    3.20
   5   5 -11  201.10    7.60
  -5   5  11  191.60    7.50
  -5  -5  11  193.90    8.10
  -5  -5  11  190.20    8.30
   5  -5 -11  194.00    7.40
   5  -5 -11  205.10   10.10
   5   5 -10   17.90    1.70
  -5   5  10   19.80    1.40
  -5  -5  10   28.30    6.60
   5  -5 -10   20.90    1.70
   5   5  -9  139.40    6.10
  -5   5   9  136.90    5.30
  -5  -5   9  140.00    5.80
   5  -5  -9  138.00    5.40
   5   5  -8    0.10    1.20
  -5   5   8    0.30    0.90
  -5  -5   8   -2.10    1.40
   5  -5  -8    2.10    1.20
   5   5  -7  201.30    7.90
   5   5  -7  218.00    8.30
  -5   5   7  206.20    8.00
   5  -5  -7  210.20    7.80
   5   5  -6  104.40    4.40
   5   5  -6  105.50    4.40
  -5   5   6  102.00    4.30
   5  -5  -6  100.50    4.10
   5   5  -5  344.00   12.90
   5   5  -5  372.60   13.90
  -5   5   5  349.70   13.00
  -5   5   5  356.30   12.70
   5   5  -4  172.70    8.80
  -5   5   4  163.70    6.30
  -5   5   4  167.70    6.60
  -5  -5   4  163.40    6.80
   5   5  -3  269.50   10.70
  -5   5   3  270.90    9.80
  -5  -5   3  269.30   10.20
   5  -5  -3  271.70   10.30
   5   5  -2  172.20    6.60
  -5   5   2  169.20    6.90
  -5  -5   2  170.00    6.80
   5  -5  -2  168.70    6.90
   5   5  -1  104.90    4.30
  -5   5   1   99.40    4.40
  -5  -5   1  100.50    4.40
   5  -5  -1  100.10    3.90
   5   5   0  184.80    7.10
  -5   5   0  176.60    7.40
  -5  -5   0  195.10    7.20
   5  -5   0  184.30    7.70
   5  -5   0  180.50    7.40
   5   5   1  447.50   16.00
  -5   5  -1  430.50   16.20
  -5  -5  -1  437.80   15.90
   5  -5   1  443.60   16.70
   5  -5   1  431.70   15.80
   5   5   2  107.90    4.90
  -5   5  -2  107.70    5.20
  -5  -5  -2  109.90    5.10
   5  -5   2  107.00    5.10
   5  -5   2  104.00    4.50
   5   5   3  399.40   15.30
  -5   5  -3  378.20   14.10
  -5  -5  -3  382.40   13.60
   5  -5   3  386.00   14.10
   5   5   4   19.70    1.80
  -5   5  -4   21.90    2.00
  -5  -5  -4   18.70    1.70
   5  -5   4   17.90    1.60
   5   5   5  388.40   14.80
  -5   5  -5  359.60   13.30
  -5  -5  -5  369.30   13.20
   5  -5   5  384.50   13.70
   5   5   6   26.30    2.00
  -5   5  -6   24.50    2.10
  -5  -5  -6   26.70    2.10
   5  -5   6   27.90    2.10
   5   5   7   39.50    2.60
  -5   5  -7   37.10    3.00
  -5  -5  -7   40.40    2.70
   5  -5   7   40.90    2.70
   5   5   8   22.00    2.10
  -5   5  -8   20.70    2.10
  -5  -5  -8   20.90    2.00
   5  -5   8   22.40    2.20
   5   5   9  542.50   18.70
  -5   5  -9  506.40   18.80
  -5  -5  -9  523.00   18.50
   5  -5   9  530.00   19.00
   5   5  10    1.60    2.00
  -5   5 -10    3.00    1.30
  -5  -5 -10    1.30    3.20
   5  -5  10    1.30    1.90
   5   5  11  238.90    9.40
  -5   5 -11  222.90   10.60
  -5  -5 -11  229.40    9.00
   5  -5  11  234.60    9.50
   5   5  12   78.60    4.40
  -5  -5 -12   83.50    4.20
   5  -5  12   85.00    4.30
   5   5  13   88.00    4.90
  -5  -5 -13   82.80    4.40
  -5  -5 -13   97.00    3.60
   5  -5  13   83.60    4.40
   5   5  14   39.70    3.30
  -5  -5 -14   31.20    3.10
   5  -5  14   31.90    3.10
   5   5  15  141.90    6.60
  -5  -5 -15  124.30    6.50
   5  -5  15  136.60    6.20
   5   5  16  106.40    5.70
  -5   5 -16  108.50    5.70
  -5  -5 -16  101.10    5.30
   5  -5  16  100.30    5.40
   5   5  17  171.10    8.10
  -5   5 -17  176.10    7.90
  -5  -5 -17  174.60    8.30
   5  -5  17  177.60    7.80
   5  -5  17  170.70    8.10
   5   5  18   12.60    3.90
  -5   5 -18   11.30    3.00
  -5  -5 -18    6.40    3.10
   5  -5  18   12.90    3.20
   5  -5  18   13.50    2.10
   5   5  19   84.10    5.20
  -5   5 -19   89.10    5.40
  -5  -5 -19   84.40    5.30
   5  -5  19   82.60    5.00
   5  -5  19   79.30    3.80
   5   5  20    2.10    3.20
  -5   5 -20    2.20    3.50
  -5  -5 -20   -0.70    3.10
   5  -5  20   -2.20    3.30
   5  -5  20    2.20    1.10
  -5   5 -21   63.00    4.40
  -5  -5 -21   51.70    5.20
  -5   5 -22    2.90    3.70
  -5  -5 -22    6.90    4.80
  -5   5 -23   69.50    5.80
  -5  -5 -23   67.40    5.80
  -5   5 -24   27.90    4.40
  -5  -5 -24   20.40    4.90
  -5   5 -25   33.10    4.60
  -5  -5 -25   29.20    4.90
  -5   5 -26   -0.10    3.60
  -5  -5 -26   -0.40    5.40
  -5   5 -27   23.80    4.20
  -5  -5 -27   23.00    4.80
  -5   5 -28   -1.50    3.60
  -5  -5 -28   -0.20    3.60
   5   7 -34    5.70    3.40
   5  -7 -34   -1.10    3.80
   5   7 -33    6.50    3.60
   5  -7 -33    1.40    3.10
   5   7 -32   16.50    5.30
   5  -7 -32   14.10    4.20
   5   7 -31   14.60    4.60
   5  -7 -31   12.20    3.40
   5   7 -30   20.90    3.90
  -5  -7  30   26.50    4.50
   5  -7 -30   21.20    4.00
   5   7 -29    1.40    3.40
  -5   7  29   -1.20    3.10
  -5  -7  29    1.70    3.30
   5  -7 -29    2.10    3.40
   5   7 -28   21.70    4.10
  -5   7  28   15.50    3.30
  -5  -7  28   15.70    4.60
   5  -7 -28   19.10    3.20
   5   7 -27   52.20    6.60
  -5   7  27   36.00    4.10
  -5  -7  27   46.10    4.50
   5  -7 -27   48.00    3.90
   5  -7 -27   42.30    4.40
   5   7 -26   31.70    3.50
  -5   7  26   15.90    3.90
  -5  -7  26   14.40    3.40
  -5  -7  26   24.60    4.60
   5  -7 -26   31.80    3.50
   5  -7 -26   25.20    3.60
   5   7 -25    2.30    3.10
  -5   7  25   -0.70    2.60
  -5  -7  25   -0.40    3.60
  -5  -7  25    0.80    3.90
   5  -7 -25   -0.90    2.50
   5  -7 -25    4.70    3.60
   5   7 -24   75.70    4.60
  -5   7  24   72.60    5.80
  -5  -7  24   69.80    4.80
  -5  -7  24   81.90    5.80
   5  -7 -24   71.50    4.30
   5  -7 -24   70.70    6.20
   5   7 -23   64.40    4.80
  -5   7  23   66.50    4.20
  -5  -7  23   68.40    4.30
  -5  -7  23   64.40    5.80
   5  -7 -23   64.00    4.70
   5  -7 -23   68.60    4.80
   5   7 -22   53.00    4.50
  -5   7  22   54.20    3.50
  -5  -7  22   57.60    4.10
  -5  -7  22   56.60    4.70
   5  -7 -22   55.60    6.10
   5  -7 -22   62.10    5.20
   5   7 -21   22.80    2.90
  -5   7  21   20.30    3.00
  -5  -7  21   19.40    2.80
  -5  -7  21   19.20    4.20
   5  -7 -21   27.10    3.30
   5  -7 -21   20.20    3.40
   5   7 -20   58.10    4.00
  -5   7  20   56.60    3.30
  -5  -7  20   62.40    4.20
  -5  -7  20   58.60    4.90
   5  -7 -20   59.00    3.50
   5  -7 -20   52.60    3.80
   5   7 -19   50.40    3.60
  -5   7  19   53.60    3.30
  -5  -7  19   48.20    3.40
  -5  -7  19   53.90    4.40
   5  -7 -19   52.70    3.10
   5  -7 -19   48.60    3.90
   5   7 -18   69.20    3.60
  -5   7  18   66.30    3.40
  -5  -7  18   72.30    4.20
  -5  -7  18   71.00    5.60
   5  -7 -18   66.20    3.60
   5  -7 -18   69.90    4.60
   5   7 -17   13.40    2.20
  -5   7  17   12.10    1.80
  -5  -7  17    8.10    2.40
  -5  -7  17   13.30    3.30
  -5  -7  17   12.70    2.90
   5  -7 -17   15.00    2.00
   5  -7 -17   13.90    2.40
   5   7 -16   76.60    4.00
  -5   7  16   74.00    3.90
  -5  -7  16   75.80    4.00
  -5  -7  16   74.10    4.50
   5  -7 -16   71.60    3.70
   5  -7 -16   71.20    5.10
   5   7 -15   64.50    3.70
  -5   7  15   64.40    3.20
  -5  -7  15   61.30    3.80
  -5  -7  15   67.80    4.00
   5  -7 -15   67.90    3.20
   5  -7 -15   67.90    4.50
   5   7 -14  136.50    6.30
  -5   7  14  127.10    5.30
  -5  -7  14  136.50    6.20
  -5  -7  14  141.20    5.90
   5  -7 -14  133.00    6.10
   5  -7 -14  135.40    8.50
   5   7 -13    8.60    1.70
  -5   7  13   14.20    1.80
  -5  -7  13   10.50    1.90
  -5  -7  13   13.40    2.30
   5  -7 -13   12.50    1.60
   5   7 -12  208.90    7.60
  -5   7  12  207.00    7.90
  -5  -7  12  214.70    8.70
   5  -7 -12  203.20    8.10
   5   7 -11  255.10    9.90
  -5   7  11  247.00    9.00
  -5  -7  11  250.40   10.10
   5  -7 -11  242.80    9.50
   5   7 -10   90.60    4.40
  -5   7  10   92.80    4.40
  -5  -7  10   93.50    4.60
   5  -7 -10   88.70    3.90
   5   7  -9  132.10    5.80
  -5   7   9  129.40    5.50
  -5  -7   9  136.70    5.40
   5  -7  -9  131.60    5.60
   5   7  -8   96.50    4.50
  -5   7   8   94.20    4.30
   5  -7  -8   94.60    4.30
   5   7  -7   10.10    2.90
   5   7  -7    9.80    2.50
  -5   7   7    6.70    1.40
   5  -7  -7   21.00    3.00
   5   7  -6  577.30   19.70
   5   7  -6  582.60   20.10
  -5   7   6  547.60   19.80
  -5   7   6  569.20   20.40
   5   7  -5  286.10   11.20
   5   7  -5  287.50   11.00
  -5   7   5  270.70   10.20
  -5   7   5  278.40   10.40
   5   7  -4  123.00    5.30
   5   7  -4  114.60    5.50
  -5   7   4  106.60    4.80
  -5   7   4  103.70    5.30
   5   7  -3  444.60   16.30
  -5   7   3  399.50   15.30
  -5   7   3  424.00   15.40
  -5  -7   3  424.80   15.80
   5   7  -2   76.80    3.70
  -5   7   2   73.20    3.30
  -5  -7   2   72.50    3.70
   5  -7  -2   72.70    3.50
   5   7  -1   28.50    3.00
  -5   7   1   24.30    1.90
  -5  -7   1   39.70    3.00
   5  -7  -1   33.60    2.60
   5   7   0  404.10   14.90
  -5   7   0  399.80   15.10
  -5  -7   0  391.00   14.50
   5  -7   0  408.30   15.00
   5   7   1  799.20   28.70
  -5   7  -1  796.00   27.50
  -5  -7  -1  781.70   27.00
   5  -7   1  782.10   26.60
   5   7   2  208.80    8.00
  -5   7  -2  207.60    8.20
  -5  -7  -2  209.60    8.40
   5  -7   2  221.90    7.90
   5   7   3   84.10    4.00
  -5   7  -3   87.30    4.20
  -5  -7  -3   84.80    3.90
   5  -7   3   84.30    3.60
   5  -7   3   85.90    4.00
   5   7   4  227.20    8.60
  -5   7  -4  227.60   10.10
  -5  -7  -4  228.10    8.70
   5  -7   4  222.00    8.50
   5  -7   4  219.00    8.70
   5   7   5  100.40    4.40
  -5   7  -5  103.80    5.60
  -5  -7  -5  110.50    5.00
   5  -7   5  102.40    5.20
   5  -7   5  107.90    4.80
   5   7   6  507.10   18.20
  -5   7  -6  485.30   18.10
  -5  -7  -6  503.60   17.40
   5  -7   6  506.80   19.30
   5   7   7   69.90    3.60
  -5   7  -7   66.60    3.70
  -5  -7  -7   66.80    3.50
   5  -7   7   67.30    3.60
   5   7   8    6.30    1.80
  -5   7  -8   12.00    2.90
  -5  -7  -8    8.20    3.40
   5  -7   8    4.60    1.90
   5   7   9  155.00    6.20
  -5   7  -9  139.10    6.30
  -5  -7  -9  144.70    6.20
   5  -7   9  154.40    6.50
   5   7  10  144.50    6.00
  -5   7 -10  137.20    5.80
  -5  -7 -10  138.30    5.90
   5  -7  10  136.20    6.10
   5   7  11    5.00    2.70
  -5  -7 -11   -0.50    1.90
   5  -7  11    3.20    2.10
   5   7  12  100.30    5.80
  -5  -7 -12   96.30    5.00
   5  -7  12   99.60    4.70
   5   7  13  101.60    5.10
  -5   7 -13   90.30    5.00
  -5  -7 -13   92.20    4.60
   5  -7  13   93.80    5.40
   5   7  14   54.40    3.50
  -5   7 -14   51.00    3.50
  -5  -7 -14   50.20    3.50
   5  -7  14   50.80    3.80
   5   7  15   51.00    3.70
  -5   7 -15   56.90    4.00
  -5  -7 -15   53.30    3.70
   5  -7  15   52.00    8.50
   5   7  16   52.60    4.40
  -5   7 -16   68.50    5.10
  -5  -7 -16   62.70    4.90
  -5  -7 -16   56.10    2.90
   5  -7  16   56.60    4.30
   5   7  17   52.20    4.90
  -5   7 -17   51.20    4.40
  -5  -7 -17   70.30    6.20
  -5  -7 -17   65.50    2.60
   5  -7  17   53.90    4.20
   5   7  18   72.10    4.80
  -5   7 -18   78.10    5.90
  -5  -7 -18   75.60    4.90
   5  -7  18   73.90    5.40
   5   7  19   34.60    4.20
  -5   7 -19   38.40    4.10
  -5  -7 -19   41.60    4.10
   5  -7  19   51.40    9.10
  -5   7 -20   16.70    3.50
  -5  -7 -20   15.90    4.20
   5  -7  20   12.30    2.20
  -5   7 -21   28.10    4.30
  -5  -7 -21   33.80    4.80
   5  -7  21   36.30    3.10
  -5   7 -22   67.60    5.40
  -5  -7 -22   64.20    5.00
   5  -7  22   55.70    3.60
  -5   7 -23   38.70    5.10
  -5  -7 -23   37.50    8.50
  -5   7 -24   18.90    4.10
  -5  -7 -24   25.40    4.60
  -5   7 -26   26.50    4.60
  -5  -7 -26  126.30   25.90
  -5   7 -27   31.00    5.80
  -5  -7 -27   28.90    4.70
  -5  -7 -28   13.10    4.60
   5   9 -33    3.10    3.50
   5  -9 -33    2.30    3.20
   5   9 -32   47.10    6.40
   5  -9 -32   33.40    4.30
   5   9 -31   -2.30    3.80
   5  -9 -31    3.40    3.00
   5   9 -30   27.60    4.60
  -5  -9  30   29.70    5.60
   5  -9 -30   28.80    4.10
   5   9 -29    0.40    4.50
  -5  -9  29   -9.00    4.50
   5  -9 -29    2.50    3.80
   5   9 -28   47.50    5.00
  -5   9  28   31.90    4.00
  -5  -9  28   41.00    5.10
   5  -9 -28   52.00    4.50
   5   9 -27    2.80    3.50
  -5   9  27    7.40    4.20
  -5  -9  27    3.80    3.70
   5  -9 -27   -0.60    3.80
   5  -9 -27   -2.60    3.60
   5   9 -26   47.60    4.50
  -5   9  26   35.50    3.90
  -5  -9  26   50.70    6.10
   5  -9 -26   43.70    3.60
   5  -9 -26   47.90    5.70
   5   9 -25    9.20    3.60
  -5   9  25    6.50    3.30
  -5  -9  25   -0.50    4.40
  -5  -9  25    8.00    3.50
   5  -9 -25    7.20    2.80
   5  -9 -25    8.60    3.90
   5   9 -24   82.00    5.40
  -5   9  24   67.70    5.00
  -5  -9  24   81.00    5.20
  -5  -9  24   81.90    5.80
   5  -9 -24   77.00    4.50
   5  -9 -24   72.10    4.90
   5   9 -23   11.20    3.20
  -5   9  23   14.60    3.70
  -5  -9  23   17.10    3.40
  -5  -9  23   17.30    4.60
   5  -9 -23   15.10    2.60
   5  -9 -23   12.10    3.30
   5   9 -22   85.70    5.30
  -5   9  22   82.90    4.80
  -5  -9  22   94.40    4.80
  -5  -9  22  101.30    6.40
   5  -9 -22   89.70    5.00
   5  -9 -22   83.90    6.00
   5   9 -21   64.40    3.90
  -5   9  21   63.00    3.90
  -5  -9  21   58.00    4.50
  -5  -9  21   59.00    5.20
   5  -9 -21   63.90    3.50
   5  -9 -21   56.50    5.00
   5   9 -20  106.70    5.90
  -5   9  20   99.50    4.90
  -5  -9  20  104.00    5.90
  -5  -9  20  100.80    7.60
   5  -9 -20  119.30    7.40
   5  -9 -20  103.00    5.80
   5   9 -19   75.40    4.20
  -5   9  19   76.90    5.00
  -5  -9  19   70.90    4.20
   5  -9 -19   69.50    3.90
   5  -9 -19   66.90    4.90
   5   9 -18  142.00    7.10
  -5   9  18  126.90    5.50
  -5  -9  18  119.70    5.80
  -5  -9  18  133.70    6.60
   5  -9 -18  137.90    6.20
   5  -9 -18  121.40    6.50
   5   9 -17   19.50    3.40
  -5   9  17   14.20    1.80
  -5  -9  17    9.90    2.90
  -5  -9  17   16.80    2.80
   5  -9 -17   15.20    2.30
   5  -9 -17   16.80    3.10
   5   9 -16  170.20    7.30
  -5   9  16  156.40    6.80
  -5  -9  16  167.00    7.20
  -5  -9  16  166.00    8.10
   5  -9 -16  167.90    7.20
   5   9 -15   78.70    4.10
  -5   9  15   75.80    3.60
  -5  -9  15   71.30    3.80
  -5  -9  15   76.40    4.70
   5  -9 -15   74.90    4.00
   5   9 -14  155.00    6.20
  -5   9  14  155.00    6.60
  -5  -9  14  157.70    6.40
   5  -9 -14  158.30    6.80
   5   9 -13   43.60    3.20
  -5   9  13   46.40    2.50
  -5  -9  13   47.80    2.90
   5  -9 -13   46.30    2.60
   5   9 -12  159.50    6.90
  -5   9  12  158.80    6.20
  -5  -9  12  159.60    7.00
   5  -9 -12  157.20    6.60
   5   9 -11   -3.10    1.80
  -5   9  11   -3.30    1.50
  -5  -9  11   -2.50    1.90
   5  -9 -11    1.80    1.80
   5   9 -10  245.50   10.20
  -5   9  10  250.90    9.70
  -5  -9  10  255.20   10.30
   5  -9 -10  249.30   10.20
   5   9  -9   23.50    2.50
   5   9  -9   22.80    2.10
  -5   9   9   24.40    1.70
   5  -9  -9   22.30    2.20
   5   9  -8  198.40    7.80
   5   9  -8  212.10    8.10
  -5   9   8  193.50    8.10
   5  -9  -8  189.00    8.00
   5   9  -7    0.20    1.90
   5   9  -7    1.90    2.10
  -5   9   7    1.00    1.30
  -5   9   7    2.80    1.60
   5   9  -6  118.40    5.40
   5   9  -6  120.50    5.20
  -5   9   6  111.90    5.40
  -5   9   6  117.60    5.30
   5   9  -5   10.60    2.50
   5   9  -5   13.60    2.60
  -5   9   5    9.40    2.10
  -5   9   5    7.50    2.00
   5   9  -4  238.00    9.70
   5   9  -4  237.50    9.40
  -5   9   4  229.70    9.40
  -5   9   4  234.50    9.50
   5   9  -3    6.80    2.00
  -5   9   3    2.60    1.60
  -5   9   3    1.20    1.20
  -5  -9   3    5.90    2.50
   5   9  -2  105.10    5.20
  -5   9   2  102.20    4.70
  -5   9   2   98.10    4.40
  -5  -9   2   98.00    4.90
   5   9  -1   22.60    2.40
  -5   9   1   16.60    2.00
  -5  -9   1   20.80    2.10
   5  -9  -1   17.60    1.70
   5   9   0  166.50    6.80
  -5   9   0  159.90    6.90
  -5  -9   0  165.00    7.20
   5  -9   0  167.30    7.10
   5   9   1   -3.30    1.70
  -5   9  -1    8.50    2.20
  -5  -9  -1    5.00    2.30
   5  -9   1    2.50    2.00
   5   9   2  376.70   13.50
  -5   9  -2  381.20   14.40
  -5  -9  -2  365.90   13.70
   5  -9   2  393.70   15.20
   5   9   3    0.10    1.70
  -5   9  -3    0.70    1.60
  -5  -9  -3    0.50    1.80
   5  -9   3    2.60    1.50
   5   9   4   34.00    2.50
  -5   9  -4   34.70    2.70
  -5  -9  -4   30.30    2.40
   5  -9   4   35.60    2.40
   5   9   5   29.80    2.60
  -5   9  -5   27.90    2.50
  -5  -9  -5   28.10    2.50
   5  -9   5   27.40    2.30
   5   9   6  487.60   18.50
  -5   9  -6  486.90   18.00
  -5  -9  -6  487.50   18.80
   5  -9   6  489.80   18.40
   5  -9   6  477.90   17.30
   5   9   7    5.30    2.10
  -5   9  -7    1.00    1.90
  -5  -9  -7    2.10    1.90
   5  -9   7    5.80    2.10
   5   9   8   66.10    3.60
  -5   9  -8   65.30    3.80
  -5  -9  -8   66.90    3.70
   5  -9   8   71.30    3.70
   5   9   9    1.80    2.40
  -5   9  -9   -0.50    2.00
  -5  -9  -9   -4.40    2.00
   5  -9   9    2.10    2.00
   5   9  10  325.20   12.80
  -5   9 -10  322.60   13.30
  -5  -9 -10  336.20   12.50
   5  -9  10  317.20   13.50
   5   9  11   45.50    3.50
  -5   9 -11   40.50    4.60
  -5  -9 -11   41.50    3.30
   5  -9  11   43.40    3.30
   5   9  12   17.30    2.50
  -5   9 -12   14.80    3.70
  -5  -9 -12   11.60    2.50
   5  -9  12   19.50    3.00
   5   9  13    0.90    2.40
  -5   9 -13   -1.90    2.60
  -5  -9 -13   -2.60    2.20
   5  -9  13   -4.60    2.80
   5   9  14  188.50    8.00
  -5   9 -14  195.00    9.00
  -5  -9 -14  195.60    8.50
   5  -9  14  178.20    8.70
   5   9  15   20.90    3.10
  -5  -9 -15   22.70    3.20
   5  -9  15   18.60    3.40
   5   9  16   38.50    3.80
  -5   9 -16   38.20    3.40
  -5  -9 -16   41.70    5.90
   5  -9  16   39.80    4.30
   5   9  17    8.50    2.80
  -5   9 -17    8.10    3.20
  -5  -9 -17   14.40    3.00
   5  -9  17    9.10    4.50
   5   9  18  144.40    9.70
  -5   9 -18  123.80    6.80
  -5  -9 -18  136.60    7.20
  -5  -9 -18  123.40    5.70
   5  -9  18  113.20    7.50
  -5   9 -19    6.50    3.60
  -5  -9 -19    7.20    4.10
  -5  -9 -19    4.30    1.60
  -5   9 -20   27.50    4.40
  -5  -9 -20   28.50    3.90
  -5  -9 -20   29.00    1.90
  -5   9 -21    3.30    4.20
  -5  -9 -21    1.00    3.40
  -5   9 -22   97.10    6.60
  -5  -9 -22   99.30   10.20
   5  -9  22   85.90    6.10
  -5   9 -23    0.30    5.40
  -5  -9 -23    1.50    4.00
  -5   9 -24   22.40    4.50
  -5  -9 -24   18.40    4.50
  -5   9 -26   61.10    6.00
  -5  -9 -26   60.20    7.00
  -5  -9 -27    9.40    4.60
   5  11 -32   25.90   10.90
   5 -11 -32   13.50    4.50
   5  11 -31   27.10    5.10
   5 -11 -31   21.50    3.70
   5  11 -30    2.30    5.00
  -5 -11  30    1.40    6.10
   5 -11 -30    6.30    3.30
   5  11 -29    5.70    4.50
  -5 -11  29   14.20    9.10
   5 -11 -29    7.70    3.60
   5  11 -28   29.60    6.60
  -5 -11  28   21.30    4.60
   5 -11 -28   26.20    5.00
   5  11 -27   19.60    3.80
  -5  11  27   11.70    3.60
  -5 -11  27   26.90    5.80
   5 -11 -27   19.10    3.50
   5  11 -26   46.00    5.20
  -5  11  26   36.90    4.20
  -5 -11  26   50.30    6.00
   5 -11 -26   44.80    4.10
   5 -11 -26   44.40    4.80
   5  11 -25    4.70    4.00
  -5  11  25   -1.30    3.30
  -5 -11  25    4.40    3.70
   5 -11 -25    1.80    3.20
   5 -11 -25    6.30    4.00
   5  11 -24   24.40    3.90
  -5  11  24   21.10    3.70
  -5 -11  24   25.50    4.20
   5 -11 -24   30.50    3.50
   5 -11 -24   24.60    3.90
   5  11 -23   51.20    4.20
  -5  11  23   51.80    3.70
  -5 -11  23   45.40    5.00
  -5 -11  23   59.30    5.00
   5 -11 -23   53.90    3.80
   5 -11 -23   51.20    4.40
   5  11 -22   46.40    4.20
  -5  11  22   36.30    3.70
  -5 -11  22   38.30    3.60
  -5 -11  22   44.50    4.80
   5 -11 -22   39.80    3.30
   5 -11 -22   34.60    4.40
   5  11 -21   46.80    4.70
  -5  11  21   46.70    4.70
  -5 -11  21   36.70    4.30
   5 -11 -21   44.10    4.00
   5 -11 -21   38.10    4.10
   5  11 -20   67.00    6.00
  -5  11  20   61.50    3.70
  -5 -11  20   54.00    4.30
  -5 -11  20   65.90    4.00
   5 -11 -20   66.50    4.20
   5 -11 -20   63.30    4.50
   5  11 -19   35.00    3.50
  -5  11  19   34.60    2.80
  -5 -11  19   36.20    3.60
  -5 -11  19   38.10    3.30
   5 -11 -19   38.80    5.70
   5 -11 -19   39.50    5.00
   5  11 -18   24.90    3.10
  -5  11  18   22.90    2.30
  -5 -11  18   22.90    3.10
  -5 -11  18   25.60    3.10
   5 -11 -18   31.80    5.00
   5  11 -17    8.40    2.50
  -5  11  17   15.90    3.80
  -5 -11  17    6.40    2.70
  -5 -11  17    6.10    2.80
   5 -11 -17    4.90    1.90
   5  11 -16  146.10    6.80
  -5  11  16  135.80    5.90
  -5 -11  16  147.60    6.80
   5 -11 -16  143.50    6.70
   5  11 -15   38.90    3.40
  -5  11  15   40.80    2.60
  -5 -11  15   43.00    3.20
   5 -11 -15   38.00    2.90
   5  11 -14   53.40    3.90
  -5  11  14   54.00    3.00
  -5 -11  14   54.90    3.40
   5 -11 -14   55.00    3.40
   5  11 -13   23.70    2.70
  -5  11  13   22.60    2.10
  -5 -11  13   25.60    4.80
   5 -11 -13   21.40    2.20
   5  11 -12   32.30    3.00
  -5  11  12   35.30    2.70
  -5 -11  12   33.50    2.60
   5 -11 -12   32.50    2.60
   5  11 -11   37.40    3.10
  -5  11  11   36.70    2.40
  -5 -11  11   37.10    3.40
   5 -11 -11   38.10    2.50
   5  11 -10  279.40   10.70
   5  11 -10  298.10   11.20
  -5  11  10  282.70   10.50
   5 -11 -10  292.00   11.10
   5  11  -9    4.70    2.10
   5  11  -9   -0.70    1.90
  -5  11   9    0.20    1.20
   5 -11  -9    4.90    1.50
   5  11  -8   70.90    4.20
   5  11  -8   76.30    4.40
  -5  11   8   70.90    3.60
  -5  11   8   67.70    3.50
   5  11  -7  427.90   15.20
   5  11  -7  418.10   15.60
  -5  11   7  379.80   15.10
  -5  11   7  409.40   15.60
   5  11  -6  106.60    4.70
   5  11  -6  108.10    4.70
  -5  11   6   94.20    4.60
  -5  11   6  101.30    4.80
   5  11  -5    3.30    2.20
   5  11  -5    7.90    1.90
  -5  11   5    5.50    1.50
  -5  11   5    7.40    1.90
   5  11  -4   96.50    4.70
   5  11  -4   98.70    4.70
  -5  11   4   91.70    4.60
  -5  11   4  101.30    4.70
   5  11  -3  145.60    6.10
   5  11  -3  141.80    6.20
  -5  11   3  136.80    6.40
  -5  11   3  144.70    6.20
   5  11  -2   62.00    3.70
  -5  11   2   57.30    3.00
  -5  11   2   60.50    3.70
  -5 -11   2   63.20    3.40
   5  11  -1   73.50    4.00
  -5  11   1   79.80    3.80
  -5  11   1   76.70    3.90
  -5 -11   1   72.80    3.70
   5  11   0  157.70    7.40
  -5  11   0  151.50    7.30
  -5 -11   0  151.90    6.90
   5 -11   0  166.30    6.30
   5  11   1  145.60    6.30
  -5  11  -1  149.50    6.60
  -5 -11  -1  139.50    6.10
   5 -11   1  152.30    6.30
   5  11   2  106.60    5.10
  -5  11  -2  102.30    4.80
  -5 -11  -2   99.20    4.80
   5 -11   2  102.00    4.60
   5  11   3   33.00    2.60
  -5  11  -3   31.80    2.60
  -5 -11  -3   31.30    2.80
   5 -11   3   32.50    2.50
   5  11   4   72.20    3.90
  -5  11  -4   72.10    4.40
  -5 -11  -4   77.30    4.30
   5 -11   4   77.40    3.90
   5  11   5  188.00    7.70
  -5  11  -5  184.80    7.30
  -5 -11  -5  178.10    7.10
   5 -11   5  180.90    8.10
   5  11   6   74.10    3.80
  -5  11  -6   75.40    4.40
  -5 -11  -6   76.60    4.30
   5 -11   6   76.10    4.30
   5  11   7   -0.50    2.80
  -5  11  -7   -1.80    2.30
  -5 -11  -7   -2.70    2.10
   5 -11   7   17.20    5.00
   5  11   8   65.10    3.70
  -5  11  -8   66.50    3.80
  -5 -11  -8   67.90    4.10
   5 -11   8   67.50    4.00
   5 -11   8   66.30    3.10
   5  11   9   70.60    4.30
  -5  11  -9   73.90    4.00
  -5 -11  -9   71.90    4.10
   5 -11   9   69.20    4.10
   5  11  10   19.60    2.80
  -5  11 -10   20.40    2.90
  -5 -11 -10   21.50    2.70
   5 -11  10   24.10    2.80
   5  11  11    4.40    2.90
  -5  11 -11   -0.20    2.50
  -5 -11 -11    2.50    2.20
   5 -11  11    0.50    2.30
   5  11  12   55.90    3.70
  -5  11 -12   55.80    4.40
  -5 -11 -12   56.60    4.40
   5 -11  12   66.60    3.70
   5  11  13    6.00    2.70
  -5  11 -13    6.00    3.20
  -5 -11 -13    5.20    2.40
   5 -11  13    6.60    2.80
   5  11  14  126.40    6.70
  -5  11 -14  129.80    6.90
  -5 -11 -14  126.60    7.20
   5 -11  14  125.50    6.60
   5  11  15   26.90    3.10
  -5  11 -15   37.60    3.90
  -5 -11 -15   25.20    3.20
   5 -11  15   27.20    3.60
   5  11  16    6.50    3.10
  -5  11 -16    5.00    3.30
  -5 -11 -16    7.50    2.80
   5 -11  16    2.40    3.40
   5  11  17   30.00    4.60
  -5  11 -17   37.40    4.60
  -5 -11 -17   43.70    4.40
  -5  11 -18   30.10    4.60
  -5 -11 -18   31.80    4.50
  -5  11 -19   43.00    4.80
  -5 -11 -19   30.50    3.90
  -5 -11 -19   28.60    2.70
  -5  11 -20   43.10    4.80
  -5 -11 -20   42.90    7.70
  -5  11 -21   11.70    5.70
  -5 -11 -21    3.90    3.80
  -5  11 -22   19.70    4.80
  -5 -11 -22   18.30    4.50
  -5  11 -23   38.80    6.50
  -5 -11 -23   25.10    4.40
  -5  11 -25   17.60    8.00
  -5 -11 -25    7.50    4.50
  -5 -11 -26    9.20    4.00
   5 -13 -31   10.60    4.00
   5  13 -30    6.10    3.80
   5 -13 -30    2.90    4.00
   5  13 -29   33.30    5.50
  -5 -13  29   34.20    5.10
   5 -13 -29   47.40    6.40
   5  13 -28    3.90    4.40
  -5 -13  28   -1.70    4.40
   5 -13 -28    2.30    2.80
   5  13 -27   27.70    4.60
  -5 -13  27   27.50    5.50
   5 -13 -27   28.70    4.40
   5  13 -26    7.90    4.30
  -5 -13  26   10.80    4.20
   5 -13 -26    2.60    2.70
   5  13 -25   42.10    5.00
  -5  13  25   30.60    4.30
  -5 -13  25   33.80    5.50
   5 -13 -25   34.90    4.20
   5 -13 -25   31.50    4.10
   5  13 -24   -2.30    5.00
  -5  13  24    1.10    3.40
  -5 -13  24    3.20    4.70
   5 -13 -24    1.10    3.60
   5 -13 -24   -0.20    3.20
   5  13 -23   70.70    5.00
  -5  13  23   54.10    4.20
   5 -13 -23   63.30    4.50
   5 -13 -23   55.90    5.60
   5  13 -22   12.30    3.20
  -5  13  22    8.10    2.60
   5 -13 -22    8.90    3.20
   5 -13 -22    8.20    3.70
   5  13 -21   29.30    4.90
  -5  13  21   25.80    3.30
  -5 -13  21   30.70    3.70
   5 -13 -21   27.70    3.40
   5 -13 -21   27.30    4.30
   5  13 -20    0.50    3.10
  -5  13  20    4.80    3.20
  -5 -13  20   -6.10    3.50
  -5 -13  20    6.60    2.70
   5 -13 -20    4.00    3.30
   5  13 -19   62.00    4.40
  -5  13  19   67.10    6.30
  -5 -13  19   58.80    4.50
  -5 -13  19   66.00    4.70
   5 -13 -19   59.50    4.60
   5  13 -18    1.50    3.50
  -5  13  18    3.20    2.40
  -5 -13  18    0.60    2.60
  -5 -13  18   10.70    3.50
   5 -13 -18    1.20    3.40
   5  13 -17   41.40    3.80
[truncated: 895,958 more chars]
